# Supplementary material
Source: PubMed Central journal article supplement (PMC4202387)
Supplement: NIHMS60030-supplement-Supplementary_document.pdf [file NIHMS60030-supplement-Supplementary_document.pdf]

# THE LANCET

## **Supplementary appendix**

This appendix formed part of the original submission and has been peer reviewed. We post it as supplied by the authors.

Supplement to: Murray CJL, Ortblad KF, Guinovart C, et al. Global, regional, and national incidence and mortality for HIV, tuberculosis, and malaria during 1990–2013: a systematic analysis for the Global Burden of Disease Study 2013. *Lancet* 2014; published online July 22. [http://dx.doi.org/10.1016/S0140-6736\(14\)60844-8](http://dx.doi.org/10.1016/S0140-6736(14)60844-8).

# Global, regional and national incidence and death for HIV, tuberculosis and malaria during 1990-2013: a systematic analysis for the Global Burden of Disease Study 2013

---

This appendix provides more methodological detail on the HIV, TB, and malaria morbidity and mortality estimation process,

## Table of Contents

|     |                                                                           |    |
|-----|---------------------------------------------------------------------------|----|
| 1.  | HIV.....                                                                  | 2  |
| 1.1 | Additional methods for calculation mortality off ART.....                 | 2  |
|     | Data.....                                                                 | 2  |
|     | Calculating HIV Relative Survival.....                                    | 2  |
|     | Statistical Model .....                                                   | 2  |
|     | Compartmental Model .....                                                 | 2  |
| 1.2 | Additional methods for calculating mortality on ART .....                 | 3  |
|     | Data.....                                                                 | 3  |
|     | Modelling.....                                                            | 3  |
| 1.3 | HIV mortality in countries with vital registration systems .....          | 4  |
|     | Garbage code redistribution.....                                          | 4  |
|     | Misclassification paragraph .....                                         | 4  |
|     | Imputation of missing years for a complete time series of mortality ..... | 5  |
| 2.  | Tuberculosis.....                                                         | 5  |
| 2.1 | CODEm.....                                                                | 5  |
| 2.2 | DisMod-MR 2.0 data sources .....                                          | 7  |
| 2.3 | DisMod-MR 2.0 description and implementation.....                         | 7  |
| 2.4 | Incidence, Prevalence, and Mortality for TB with HIV.....                 | 11 |
| 3.  | Malaria.....                                                              | 11 |
| 3.1 | Explanation of malaria covariates .....                                   | 11 |
| 3.2 | CODEm Results .....                                                       | 11 |
| 3.3 | Sensitivity analysis .....                                                | 12 |
| 3.4 | Country groupings for malaria incidence data .....                        | 12 |
| 4.  | References .....                                                          | 12 |
| 5.  | Supplementary Tables and Figures.....                                     | 14 |

# 1. HIV

## 1.1 Additional methods for calculation mortality off ART

### Data

We reviewed the literature of HIV mortality in the absence of ART using the PubMed search terms *(((HIV) AND (mortality OR survival OR death) AND (seroconverters OR seroconversion OR seropositive OR seropositivity)))* and also screened the references of articles discovered by the search. These terms identified 2809 studies. These titles were screened and 145 abstracts were flagged for review. Studies were considered if they contained all-cause adult survival curves from time of sero-conversion. In total, we included 13 studies (Appendix Table 1). All pooled, age, and sex-specific survival data was extracted at one-year intervals up to 12 years since sero-conversion, after which data availability was sparse.

### Calculating HIV Relative Survival

To estimate HIV relative mortality, we calculated conditional mortality rates and subtracted estimates of age, sex, country, and year-specific background mortality rates.<sup>1</sup> Since this was calculated for each data point, we set the conditional HIV relative mortality rate to zero when the background mortality exceeded the all-cause conditional mortality for that study-year.

### Statistical Model

We developed a regression model to estimate the range of survival curves extracted in our analysis. Logit-transformed one year conditional probabilities of death were regressed on age group and year since sero-conversion indicator variables with a study-level random effect. To be consistent with UNAIDS Spectrum compartmental model, we used four age groups: 15-24, 25-34, 35-44, and 45+. The model's uncertainty was estimated using standard simulation methods by drawing 1000 times for each age group from the variance-covariance matrix of the regression coefficients and the standard deviation of the study level random effect.

### Compartmental Model

The AIDS Impact Model (AIM) component of Spectrum takes age and CD4-specific mortality and progression probabilities as inputs for epidemic estimates. These parameters are determined by optimizing a compartmental model such that the output matches Weibull-distribution fitted to survival data from three East African cohorts and a South African miners cohort.<sup>2</sup> We programmed a version of the UNAIDS compartmental model into R in order to quickly cycle through survival curve draws from our statistical model.<sup>3</sup> For each of these survival curves, we use the UNAIDS optimization framework, which assumes exponentially increasing mortality hazards and linearly increasing progression hazards across CD4 bins. We calculated loss as the sum of the squared errors between the predicted survival curve and the survival draw from the statistical model. This loss function was optimized using the *optim* package in R.

Appendix Figure 1a, 1b, and 1c show 1000 survival curves for each age group that capture the systematic variation in survival across the available studies for ages 15 to 24, 35 to 45, and 45+.

## 1.2 Additional methods for calculating mortality on ART

### Data

A PubMed search was conducted using the terms: (*"hiv"[MeSH Terms] OR "hiv"[All Fields]*) AND (*"mortality"[Subheading] OR "mortality"[All Fields] OR "mortality"[MeSH Terms]*) AND *antiretroviral[All Fields]* AND (*"therapy"[Subheading] OR "therapy"[All Fields] OR "therapeutics"[MeSH Terms] OR "therapeutics"[All Fields]*). The articles identified by this search were considered for inclusion in three separate meta-analyses: (1) probability of death by initial CD4 count; (2) age hazard ratios for mortality; and (3) sex hazard ratios for mortality. Studies were eligible for inclusion in the probability of death analysis if they reported data on both mortality and LTFU. Studies that traced patients through vital registration or other efforts were assumed to have 0 LTFU. Age and sex hazard ratios were only eligible if they were adjusted for the other factors of interest (age, sex and initial CD4, as applicable). Exclusion criteria for all studies included non-ART-naïve populations, children, and special populations such as hospitalized patients. For probability of death, 39 articles were included, contributing data for 80 distinct cohorts. For sex hazard ratios, 78 articles were included, contributing data for 86 cohorts. For age hazard ratios, 40 articles and cohorts were included. Appendix Table 2 shows the data sources included in these analyses.

### Modelling

We identified 17 studies that identified the true outcomes of lost to follow-up patients (LTFU) patients; 14 of which were included in a prior LTFU analysis<sup>4</sup> as well as 3 recently published studies. The results from these studies were used to adjust the extracted mortality estimates. Our methods built on previous work,<sup>4-6</sup> which exploits the observed relationship between total proportion LTFU in tracking studies and the proportion of those that had died. The relationship was estimated using the following equation:

$$\ln\left(\frac{M_{LTFU}}{1 - M_{LTFU}}\right) = \beta_0 + \beta_1 \ln\left(\frac{P_{LTFU}}{1 - P_{LTFU}}\right) + \varepsilon$$

Where  $M_{LTFU}$  is the proportion dying among those LTFU and  $P_{LTFU}$  is the proportion of the study LTFU.

A separate DisMod-MR 2.0 model (see below in the section on tuberculosis for a more detailed description of the parameterization of DisMod-MR 2.0) was used to synthesize adjusted CD4-specific conditional probabilities of death (0-6, 7-12, 12-24 months on ART) for each region. Age hazard ratios were referenced to the youngest age group for that study before being synthesized by DisMod-MR 2.0, including a study-level random effect. The posterior hazard ratio estimate for each age group was referenced to the hazard for the average age from the mortality studies. A random effects meta-analysis was run on the natural log of the sex hazard ratios, using the metan command in Stata.

The mortality rate estimates were multiplied by the age hazard ratios to generate age-specific estimates. The sex hazard ratios were applied using the following equations:

$$M_f = \left(\frac{M_{all}}{HR * p_m - p_m + 1}\right)$$
$$M_m = M_f * HR$$

Where  $M_f$  is the female mortality rate,  $M_{all}$  is the overall mortality rate found in the mortality studies,  $HR$  is the hazard for males compared to females,  $p_m$  is the proportion male, and  $M_m$  is the male mortality rate.

Background mortality rates excluding HIV were subtracted to obtain estimates of the excess mortality. All steps of this process were conducted at the 1000-draw level. Appendix Tables 3a, 3b and 3c show 1000 draws from the posterior distribution for each age, sex and CD4 category in sub-Saharan African sites (3a), low-middle-income countries outside of sub-Saharan Africa (3b), and high income countries (3c) for conditional mortality rates for 0-6 months, 6-12 months and 13-24 months as inputs to Spectrum.

### 1.3 HIV mortality in countries with vital registration systems

#### Garbage code redistribution

Garbage codes are causes of death that should not be identified as underlying causes of death but have been entered as the underlying cause of death on death certificates. Classic examples of garbage codes for HIV and malaria are Acute Febrile Illness, Fever with unknown origin, Septicemia and Kaposi's sarcoma. We can see these type of garbage codes in different death registry system, verbal autopsy studies and surveillance data. For each garbage code, the potential underlying causes of death have been identified based on pathophysiology bases. For example, the target codes for Kaposi's sarcoma include "other viral related cancer" and HIV or for Acute Febrile Illness target can be malaria, HIV, meningitis, respiratory infection and other different causes based on age and sex.

As part of the GBD, different types of algorithms have been developed to redistribute garbage codes. Some redistribution is proportional, some is based on statistical methods, and some is based on evidence and studies we have found in the literature. In the main body of the paper, two examples are given the effect of redistribution on HIV deaths.

#### Misclassification

We used the method developed by Birnbaum et al<sup>7</sup> to identify potentially misclassified HIV deaths. In principle, for each cause in each country, we compute the death rate at each age relative to the death rate at age 40. We also use all the pooled vital registration data in countries with HIV prevalence less than 0.1% to produce a standard relative age pattern of death. By computing the relative age pattern, differences in the level of mortality for a cause are removed from the comparison. For all diseases, the relative age pattern tends to be highly preserved. Injury relative age patterns are somewhat more variable across populations and overtime. We identify potentially misclassified deaths from HIV when the relative rates of death change over the time period during the HIV epidemic. Where the relative age pattern shows an increase in the age-groups 15-49 compared with the global standard relative age pattern and finally when there is no other explanation for the shift in the relative age pattern. All deaths that meet these criteria are transferred to HIV up until the relative age pattern reaches the global age pattern.

Appendix Table 4 shows HIV vital registration sources that were corrected for garbage codes and misclassified HIV deaths.

## Imputation of missing years for a complete time series of mortality

To use the time series of causes of death from vital registration to adjust incidence curves for the modified Spectrum analysis, we needed a complete time series. We used spatio-temporal Gaussian Process Regression (ST-GPR) to generate a complete time series from countries data. ST-GPR has been widely used for global health estimation studies.<sup>1,8-10</sup> Gaussian Process Regression (GPR) was applied to data for each country-age-sex group to derive a complete time series for HIV death rate. GPR is a stochastic modeling technique that is designed to detect signals amidst noisy data. It also serves as a powerful tool for interpolating non-linear trends.<sup>11,12</sup> Unlike classical linear models that assume that the trend underlying data follows a definitive functional form, GPR assumes that the specific trend of interest follows a Gaussian Process, which is defined by a mean function  $m(\cdot)$  and a Matérn covariance function  $Cov(\cdot)$ .

Random draws of 1,000 samples were obtained from the distributions above for every country, age, and sex group. The final estimated death rate for each country, age, and sex group was the mean of the draws. In addition, uncertainty intervals were obtained by taking the 2.5 and 97.5 percentiles of the samples. Note that the entire process was conducted in natural log scale, all values were back-transformed to the original scale. The analysis was implemented using the PyMC package in Python.

## 2. Tuberculosis

### 2.1 CODEm

Following Lozano et al and the GBD 2010, we use CODEm to model tuberculosis mortality.<sup>13,14</sup> The Cause of Death Ensemble Model (CODEm) is based on five general principles: identifying all available data, maximizing the comparability and quality of the dataset, developing a diverse set of plausible models, assessing the predictive validity of each plausible individual model and of ensemble models, and choosing the model or ensemble model with the best performance in out-of-sample predictive analysis.<sup>14</sup> Specifically, CODEm explores a large variety of possible models to estimate trends in causes of death. Possible models are identified using a covariate selection algorithm that yields many plausible combinations of covariates which are then run through four model classes. The model classes include mixed effects linear models and spatiotemporal GPR models for cause fractions and death rates. All models for each cause of death are then assessed using out-of-sample predictive validity and combined into an ensemble with optimal out-of-sample predictive performance.

We first identified a range of plausible covariates for tuberculosis based on the published literature. We divided these covariates into three groups based on the strength of epidemiological evidence: 1) class 1 covariates for which there is strong evidence and a biologically plausible pathway, 2) class 2 covariates for which there is some evidence but with a less direct causal pathway, and 3) class 3 covariates where there is general correlation evidence for a relationship as observed in previous time series or cross-sectional studies. Appendix Table 5 lists the candidate covariates, priors, and levels for the CODEm model based on physician judgment and literature review of risk factors related to tuberculosis.

For a covariate to be included, we needed to have a comparable, complete time series for 1980-2010. Transformations were performed based on the observed relationship between rates or cause fractions

and the covariate of interest untransformed or transformed – if the relationship between the transformed covariate and the rate or cause fraction was more linear than the relationship between the untransformed covariate, the transformation was included. We used the natural log transformation of lag distributed income (LDI) per capita, the logit transformation of malnutrition in children under 5 (proportion less than two standard deviations below mean weight for age),<sup>15</sup> cumulative cigarettes (5 years), smoking prevalence,<sup>16</sup> diabetes fasting plasma glucose (mmol/L),<sup>17</sup> indoor air pollution (all cooking fuels),<sup>18</sup> alcohol (liters per capita),<sup>19</sup> population density (500-1,000 ppl/sqkm, proportion), population density (over 1,000 ppl/sqkm, proportion), education (years per capita) and health system access (an aggregate measure of hospital beds per capita, in-facility deliveries, vaccination coverage, and other health system indicators produced by IHME).<sup>20,21</sup>

In the first step, we ran regressions for all possible combinations of category 1 covariates. We ran regressions for models where the dependent variable is the rate in logarithmic scale by age and models where the dependent variable is logit cause fraction by age. For each type of model, we assessed a possible universe of 64 combinations of level 1 covariates for males and females. All models, where the signs for all covariates in that model are in the expected direction and the coefficient is significant at the  $p < 0.05$  level, are retained. At levels two or three, category two and three covariates are added to these models using a forward stepwise technique which is not order dependent. This is achieved by starting the forward stepwise evaluation for each base model over for each category two covariate. Models which are subsets of other models at levels two or three were dropped. A total of 105 and 77 unique combinations of covariates for males and females respectively were kept where the prediction was significant at the  $p < 0.05$  level and in the predicted direction. Counting the covariates being run as both simple mixed effects and spatiotemporal models, this resulted in a total pool of 420 and 308 component models for males and females respectively.

As per Lozano et al, the ability of each of these models to make accurate predictions was formally evaluated.<sup>22</sup> We created 20 train-test-test splits. For each of these datasets, we randomly assign 70% of the data to the train set, 15% to the test 1 set, and the last 15% to test 2. The assignment of the data to train and test is implemented so that the pattern of holding out the data for the test datasets mimics the pattern of missingness in the full dataset. For each train dataset, we re-estimated each of the proposed models including both the linear model and the spatial-temporal model. We used the results of the models estimated on the training data alone to predict for the first test set. The test data have not been included in the model estimation; the performance of each model was therefore being evaluated out-of-sample. In this way, the out-of-sample predictions for the test set are a fair test of how each model will perform for tuberculosis mortality where the data are sparse or missing.

Predictive validity is evaluated using three metrics. First, we evaluate how well each model predicts age-specific death rates using the RMSE of the natural log of the death rate. Log death rates are comparable across age groups so that we can pool results from model performance across age groups with quite different underlying rates. Second, we also want models that predict accurate trends. To do this, for the test data, we compared the predicted slope for every time interval from 1 to 7 years and compare it to the slope from the held out data. We computed the RMSE for the predicted slope. Finally, we also want models that generate plausible prediction intervals so we computed the percent of the data in the test set included in the 95% data prediction interval. The prediction interval is based both on the uncertainty in the predicted death rate and the data variance for each observation.

Following Lozano et al, the best overall results in terms of RMSE and trend were yielded by the ensemble model with a Psi value of 1.1.<sup>22</sup> This value of Psi results in draws ranging from 91 for the top performing model to 0 for the worst performer in both males and females, as detailed in Appendix Tables 6a and 6b. For comparison it also shows the results for the best single model. The best component model for males was a spatiotemporal model on the logit of the cause fractions, with health system access, logit transformed malnutrition (proportion less than two standard deviations below mean weight for age), indoor air pollution (all cooking fuels), smoking prevalence, alcohol (liters per capita), education (years per capita), and log transformed lag distributed income (LDI) per capita. While the best component model for females was a spatiotemporal model on the logit of the cause fractions, with logit transformed malnutrition (proportion less than two standard deviations below mean weight for age), indoor air pollution (all cooking fuels), smoking prevalence, alcohol (liters per capita) and education (years per capita).

Appendix Table 7 shows TB mortality sources used in GBD 2013.

Appendix Table 8 shows CODEm covariates for both males and females.

## 2.2 Excess mortality estimates

Predicted death to incidence ratios were transformed into excess mortality hazards using the following logic. First, the relationship between incidence and prevalence is a function of remission and excess mortality:

$$\frac{i}{p} = r + m$$

Second, the population death rate from tuberculosis occurs fully among prevalent cases and hence:

$$m = \frac{d}{p}$$

Third, using these two equations we can express remission as:

$$r = ip1 + di1 - di$$

and excess mortality as:

$$m = dir1 - di$$

where  $i$  is incidence,  $p$  is prevalence,  $r$  is the remission hazard,  $m$  the excess mortality hazard and  $d$  the population mortality rate from tuberculosis.

## 2.3 DisMod-MR 2.0 data sources

Appendix Table 9 shows tuberculosis data sources used in DisMod-MR 2.0

## 2.4 DisMod-MR 2.0 description and implementation

DisMod-MR was developed for the GBD2010 study to deal with the many challenges in estimating the prevalence of non-fatal health outcomes and risk factor exposures. The information gathered by systematic reviews of published studies, grey literature sources and survey data varied tremendously for



each outcome of interest in terms of the volume of data, methods used to collect the data, geographical and temporal coverage, and the type of epidemiological parameter. The goal was to find the true variation in the occurrence of diseases and risk factors for every country and over time.

Estimates of prevalence (or any of the other epidemiological parameters of interest: incidence, remission, duration and risk of mortality) for the same populations often varied by much more than would be expected based on sampling error. Differences in data collection methods such as sampling design, case definitions, measurement instruments and implementation issues, contributed to large non-sampling error. There are two approaches to deal with this heterogeneity. One could set criteria for the optimal measurement of each disease parameter of interest and include only those studies that meet that high standard. This would make measurements comparable but would leave out the vast majority of information available. In GBD, the preferred approach is to make use of all available data that meets a minimum standard of acceptable quality and address major differences in measurement methods by adjusting data for any systematic bias introduced by a study quality characteristic relative to a chosen reference value. This was done by identifying for each disease or risk factor exposure the important study characteristics that can help explain the variation in measurements and flag data points that deviate from the chosen, optimal, reference value with a covariate. DisMod-MR then estimated a coefficient for each chosen study covariate and adjusted the data accordingly.

To help make estimates for countries and time periods for which little or no data were available, DisMod-MR would predict based on country characteristics and random effects on super-region, region and country. For this purpose a database of country covariates for 84 topic areas and 179 variants thereof was created. Missing data were filled in using Gaussian process or space-time regression methods to ensure a complete set of values for each covariate for every country and every year from 1980 to present. If no country covariates were specified and no data were available, a country estimate would revert to the average of a region, super-region or the world.

DisMod-MR dealt with any specification of age ranges by which data were available to produce estimates by the 20 standard GBD age groups. It also allowed the user to add strong prior knowledge on the age at onset or age pattern of prevalence or incidence such as restricting the occurrence of premenstrual syndrome to fertile ages or stipulating that there are no cases of Parkinson's disease before age 30. All these functions were new in DisMod-MR compared to earlier DisMod version used in previous GBD studies which required an analyst to choose one particular data source for a given disease parameter rather than being able to evaluate all available data. Hence the tool was renamed DisMod-MR, the suffix indicating the important meta-regression component. DisMod-MR also accommodated the main functionality of the earlier DisMod tools, i.e. confronting the data from different disease parameters and forcing consistency between these based on differential equations that determine the flow of cases in a stable population between those disease-free and prevalent cases of disease (through incidence or remission) and those in either category that die from other causes (other-cause mortality) and the disease of interest (cause-specific mortality).

To accommodate all functions, DisMod-MR was designed as a Bayesian meta-regression tool using a generalized negative binomial model with fixed effects on age, study and country level covariates as well

as random intercepts for country, region and super-region. Greater detail on DisMod-MR has been published in a web-appendix to the paper on non-fatal health outcomes in GBD2010.<sup>24</sup>

While DisMod-MR successfully addressed many of the major challenges in the estimation of non-fatal health outcomes and risk factor exposures it had a number of drawbacks which we have tried to solve for GBD 2013 by creating an updated version of the tool, DisMod-MR 2.0. The biggest drawback was the computing time required. Each disease model needed to run between 4 and 24 hours on a large computer cluster to produce results for all countries and three time periods (1990, 2005 and 2010). Moreover because of computational constraints a decision had to be made to restrict the consistency checks at the level of 21 regions only. To make country estimates, the relevant fixed effects on study and country covariates and the random effects for each country were applied. While this produced defensible estimates of prevalence it did not guarantee coherence between prevalence and other disease parameters such as incidence and excess mortality rates at the country level.

The code for DisMod-MR 2.0 was rewritten and optimized to run up to 50 times faster than DisMod-MR. A decision was also made to shift to an offset log-normal rather than a negative binomial model as this is easier to implement and because predictive validity tests carried out in DisMod-MR indicated that the statistical properties the two types of models were at least equivalent.

The much faster running time of the core computational engine in DisMod-MR 2.0 allows us to better evaluate all the data through a geographical cascade of four levels. At first, all the world's data are evaluated to estimate the fixed effects on age, sex, study level and country level covariates as well as a first pass at estimating the random effects for countries, regions and super-regions. The outputs of the global level are then used as prior information for the next, super-region level of the cascade. A single age pattern for both sexes and all years of interest is created with uncertainty bounds. All data points that are marked as pertaining to both sexes or flagged with a covariate for a study characteristic (e.g. a less than optimal case definition or a low response rate) are adjusted at this stage to reflect what the likely value would have been if the study had specified sex and/or used the reference study characteristic. The data are also split up between super-regions and, optionally, by time period and sex. Using the global prior and the adjusted data values for each super-region are re-estimated using the same core computational engine. While there is flexibility whether to re-assess fixed effects on sex or study level covariates at this level, the default option is to adjust the data by the sex and study-level covariates after the global level fit, only. At each successive level of the cascade the fixed effects on country-level covariates are re-evaluated and centered on the average of values for the countries that make up a super-region or region. Similarly, random effects are re-evaluated for just the countries in a given geography. It logically follows that no fixed or random effects are re-evaluated at country level. After fitting the model to each of the super-regions, the results are fed as priors to the region-specific fits and finally, region fits are used as a prior when modelling a country's results for a particular time period.

A new interface was created to draw relevant data for each disease, sequela or risk factor to be modelled, to apply all the default and optional settings and to visualize results. The analyst has a lot of choice to set model parameters to suit any given disease or risk factor of interest. There is a setting to

define the age mesh point at which DisMod-MR 2.0 does its calculations. The default setting is to use 21 age mesh points that define the 20 GBD standard age groups. For each study-level and country-level covariate the analyst can set a reference value and upper and lower values for the coefficients. The inclusion of cause-specific mortality rates by age and sex from GBD's mortality estimates is optional. An alternative method of informing a model with mortality data is by using the log of the age-standardised mortality rate as a country-level covariate. Other examples of the basic settings include a value for the parameter that determines the amount of smoothing over the age curve and is denoted by Greek letter 'xi' ( $\xi$ ); the value of the offset for the lognormal ('eta' or  $\eta$ ) for which the default setting is at one per cent of the median of available data values for a parameter or 0.0001 in case there are no data for that parameter; and a range of values for the parameter 'zeta' ( $\zeta$ ) that determines how much 'noise' the analyst allows DisMod-MR 2.0 to estimate for a parameter. The latter function is useful to the analyst. When DisMod-MR 2.0 estimates zeta close to the upper threshold it indicates there is a lot of noise in the data or it may be an indication that there are data entry errors that deserve attention.

Analysts have the choice of using a Gaussian, log-Gaussian, Laplace or Log-Laplace likelihood function in DisMod-MR 2.0. The default log-Gaussian equation for the data likelihood is:

$$-\log[p(y_j|\Phi)] = \log(\sqrt{2\pi}) + \log(\delta_j + s_j) + \frac{1}{2} \left( \frac{\log(a_j + \eta_j) - \log(m_j + \eta_j)}{\delta_j + s_j} \right)^2$$

where,  $y_j$  is a 'measurement value' (i.e. data point);  $\Phi$  denotes all model random variables;  $\eta_j$  is the offset value, eta, for a particular 'integrand' (prevalence, incidence, remission, excess mortality rate, with-condition mortality rate, cause-specific mortality rate, relative risk or standardized mortality ratio) and  $a_j$  is the adjusted measurement for data point  $j$ , defined by:

$$a_j = e^{(-u_j - c_j)} y_j$$

where  $u_j$  is the total 'area effect' (i.e. the sum of the random effects at three levels of the cascade: super-region, region and country) and  $c_j$  is the total covariate effect (i.e. the mean combined fixed effects for sex, study level and country level covariates), defined by:

$$c_j = \sum_{k=0}^{K[I(j)]-1} \beta_{I(j),k} \hat{X}_{k,j}$$

with standard deviation

$$s_j = \sum_{l=0}^{L[I(j)]-1} \zeta_{I(j),l} \hat{Z}_{l,j}$$

where  $k$  denotes the mean value of each data point in relation to a covariate (also called x-covariate);  $I(j)$  denotes a data point for a particular integrand,  $j$ ;  $\beta_{I(j),k}$  is the multiplier of the  $k^{\text{th}}$  x-covariate for the  $i^{\text{th}}$  integrand;  $\hat{X}_{k,j}$  is the covariate value corresponding to the data point  $j$  for covariate  $k$ ;  $l$  denotes the standard deviation of each data point in relation to a covariate (also called z-covariate);  $\zeta_{I(j),k}$  is the

multiplier of the  $i^{\text{th}}$  z-covariate for the  $i^{\text{th}}$  integrand; and  $\delta_j$  is the standard deviation for adjusted measurement  $j$ , defined by:

$$\delta_j = \log[y_j + e^{(-u_j - c_j)}\eta_j + c_j] - \log[y_j + e^{(-u_j - c_j)}\eta_j]$$

Where  $m_j$  denotes the model for the  $j^{\text{th}}$  measurement, not counting effects or measurement noise and defined by:

$$m_j = \frac{1}{B(j) - A(j)} \int_{A(j)}^{B(j)} I_j(a) da$$

where  $A(j)$  is the lower bound of the age range for a data point;  $B(j)$  is the upper bound of the age range for a data point; and  $I(j)$  denotes the function of age corresponding to the integrand for data point  $j$ .

## 2.5 Incidence, Prevalence, and Mortality for TB with HIV

Appendix Table 10 shows the age-standardized incidence, prevalence, and mortality for TB with HIV.

## 3. Malaria

Appendix Table 11 lists the malaria non-fatal data sources used in DisMod-MR 2.0 for the GBD 2013.

### 3.1 Explanation of malaria covariates

We tested the following time-series variables: rainfall, health-system access, first-line antimalarial drug resistance, insecticide-treated bednet coverage, indoor residual spraying coverage, income per head, and educational attainment.<sup>24</sup> First-line antimalarial drug resistance is a weighted average by country and year of the treatment efficacy of chloroquine, sulfadoxinepyrimethamine, and artemisinin-combination therapy with weights based on the frequency of drug use. Treatment efficacy was estimated with a spatio-temporal model of in-vivo efficacy studies and WHO antimalarial drug resistance database reports.<sup>25,26</sup> Frequency of drug use was estimated with a spatio-temporal model of survey data for antimalarial drug use in children with fever, which was supplemented by program data for supply of artemisinin-combination therapy, correcting for bias with survey data as the benchmark. Updated estimates of household bednet coverage and estimates for outside of Africa were produced with a previously described Bayesian statistical model.<sup>27</sup> Coverage of indoor residual spraying was based on a spatio-temporal model of survey data for reported household spraying in the previous 12 months and program data reported to WHO, correcting for bias with survey data as the benchmark.

### 3.2 CODEm Results

Appendix Table 12 lists the malaria mortality data sources used in the GBD 2013.

Appendix Table 13 lists the covariates used in CODEm

Appendix Tables 14a-h show the ensemble performance, for males and females, over and under 5 years, inside and outside Africa.

### 3.3 Sensitivity analysis

We developed a method to adjust cause-specific mortality fractions (CSMFs) to account for sensitivity and specificity of verbal autopsy when diagnosing malaria. Using constrained non-linear optimization techniques,<sup>28</sup> we back-calculated the malaria and non-malaria CSMFs subject to the constraints that both CSMFs must sum to one, and that no CSMF can be negative. Back-calculation was tested on both the input verbal autopsy data and the modeled estimates. Because the estimated sensitivity in adults and children was much lower than specificity, most malaria CSMFs were found to be higher after adjustment than before. This is illustrated in the global number of deaths by category from 1990 to 2013 in Appendix Figure 3.

### 3.4 Country groupings for malaria incidence data

Countries were divided into three categories based on the quality and availability of their malaria incidence data. Within each of these categories, malaria incidence cases were estimated. Appendix Table 15 shows the country groupings for each of the three categories.

## 4. References

- 1 Wang H, Dwyer-Lindgren L, Lofgren KT, *et al.* Age-specific and sex-specific mortality in 187 countries, 1970–2010: a systematic analysis for the Global Burden of Disease Study 2010. *The Lancet* 2012; **380**: 2071–94.
- 2 Futures Institute. AIM: A computer program for making HIV/AIDS projections and examining the demographic and social impacts of AIDS. , 2014<https://spectrummodel.zendesk.com/attachments/token/6eixzeawlonxjg7/?name=AIM+2014+English.pdf>.
- 3 R Core Team (2012). R: A language and environment for statistical computing. R Foundation for Statistical Computing. Vienna, Austria. ISBN 3-900051-07-0.<http://www.R-project.org/> (accessed 29 Apr2014).
- 4 Brinkhof MWG, Spycher BD, Yiannoutsos C, *et al.* Adjusting Mortality for Loss to Follow-Up: Analysis of Five ART Programmes in Sub-Saharan Africa. *PLoS ONE* 2010; **5**: e14149.
- 5 Egger M, Spycher BD, Sidle J, *et al.* Correcting Mortality for Loss to Follow-Up: A Nomogram Applied to Antiretroviral Treatment Programmes in Sub-Saharan Africa. *PLoS Med* 2011; **8**: e1000390.
- 6 Verguet S, Lim SS, Murray CJL, Gakidou E, Salomon JA. Incorporating loss to follow-up in estimates of survival among HIV-infected individuals in sub-Saharan Africa enrolled in antiretroviral therapy programs. *J Infect Dis* 2013; **207**: 72–9.
- 7 Birnbaum JK, Murray CJ, Lozano R. Exposing misclassified HIV/AIDS deaths in South Africa. *Bull World Health Organ* 2011; **89**: 278–85.
- 8 Murray CJL, Rosenfeld LC, Lim SS, *et al.* Global malaria mortality between 1980 and 2010: a systematic analysis. *Lancet* 2012; **379**: 413–31.

- 9 Hogan MC, Foreman KJ, Naghavi M, *et al.* Maternal mortality for 181 countries, 1980–2008: a systematic analysis of progress towards Millennium Development Goal 5. *The Lancet* 2010; **375**: 1609–23.
- 10 Rajaratnam JK, Marcus JR, Flaxman AD, *et al.* Neonatal, postneonatal, childhood, and under-5 mortality for 187 countries, 1970–2010: a systematic analysis of progress towards Millennium Development Goal 4. *The Lancet* 2010; **375**: 1988–2008.
- 11 Rasmussen CE. Gaussian processes for machine learning. , MIT Press, 2006.
- 12 Vasudevan S, Ramos F, Nettleton E, Durrant-Whyte H. Heteroscedastic Gaussian processes for data fusion in large scale terrain modeling. In: 2010 IEEE International Conference on Robotics and Automation (ICRA). , 2010: 3452–9.
- 13 Lozano R, Naghavi M, Foreman K, *et al.* Global and regional mortality from 235 causes of death for 20 age groups in 1990 and 2010: a systematic analysis for the Global Burden of Disease Study 2010. *The Lancet* 2012; **380**: 2095–128.
- 14 Foreman KJ, Lozano R, Lopez AD, Murray CJ. Modeling causes of death: an integrated approach using CODEm. *Popul Health Metr* 2012; **10**: 1.
- 15 Cegielski JP, McMurray DN. The relationship between malnutrition and tuberculosis: evidence from studies in humans and experimental animals. *Int J Tuberc Lung Dis Off J Int Union Tuberc Lung Dis* 2004; **8**: 286–98.
- 16 Lin H-H, Ezzati M, Murray M. Tobacco Smoke, Indoor Air Pollution and Tuberculosis: A Systematic Review and Meta-Analysis. *PLoS Med* 2007; **4**: e20.
- 17 Stevenson CR, Critchley JA, Forouhi NG, *et al.* Diabetes and the risk of tuberculosis: a neglected threat to public health? *Chronic Illn* 2007; **3**: 228–45.
- 18 Rehfuss E. Fuel for life: household energy and health. Geneva, World Health Organization, 2006<http://www.who.int/indoorair/publications/>.
- 19 Lönnroth K, Williams BG, Stadlin S, Jaramillo E, Dye C. Alcohol use as a risk factor for tuberculosis – a systematic review. *BMC Public Health* 2008; **8**: 289.
- 20 Lönnroth K, Jaramillo E, Williams BG, Dye C, Raviglione M. Drivers of tuberculosis epidemics: the role of risk factors and social determinants. *Soc Sci Med* 1982 2009; **68**: 2240–6.
- 21 Rieder H. Epidemiologic Basis of Tuberculosis Control. The Union. 1999.<http://www.theunion.org/what-we-do/publications/technical/epidemiologic-basis-of-tuberculosis-control> (accessed 10 Mar2014).
- 22 Lozano R, Wang H, Foreman KJ, *et al.* Progress towards Millennium Development Goals 4 and 5 on maternal and child mortality: an updated systematic analysis. *The Lancet* 2011; **378**: 1139–65.

- 23 Vos T, Flaxman AD, Naghavi M, *et al.* Years lived with disability (YLDs) for 1160 sequelae of 289 diseases and injuries 1990-2010: a systematic analysis for the Global Burden of Disease Study 2010. *Lancet* 2012; **380**: 2163–96.
- 24 Gakidou E, Cowling K, Lozano R, Murray CJ. Increased educational attainment and its effect on child mortality in 175 countries between 1970 and 2009: a systematic analysis. *The Lancet* 2010; **376**: 959–74.
- 25 WHO. Susceptibility of plasmodium falciparum to antimalarial drugs: Report on global monitoring 1996-2004. , 2005<http://www.who.int/malaria/publications/atoz/whohtmmal20051103/en/>.
- 26 WHO. Global report on antimalarial efficacy and drug resistance: 2000-2010. , 2010<http://www.who.int/malaria/publications/atoz/9789241500470/en/>.
- 27 Flaxman AD, Fullman N, Otten MW Jr, *et al.* Rapid Scaling Up of Insecticide-Treated Bed Net Coverage in Africa and Its Relationship with Development Assistance for Health: A Systematic Synthesis of Supply, Distribution, and Household Survey Data. *PLoS Med* 2010; **7**: e1000328.
- 28 Zhu C, Byrd R, Lu P, Nocedal J. L-BFGS-B: A Limited Memory FORTRAN Code for Solving Bound Constrained Optimization Problems Tech. rep. NAM-11. EECS Department, Northwestern University, 1994.

## 5. Supplementary Tables and Figures

Appendix Figure 1a. Comparison of HIV relative survival estimates: Age group 15–24

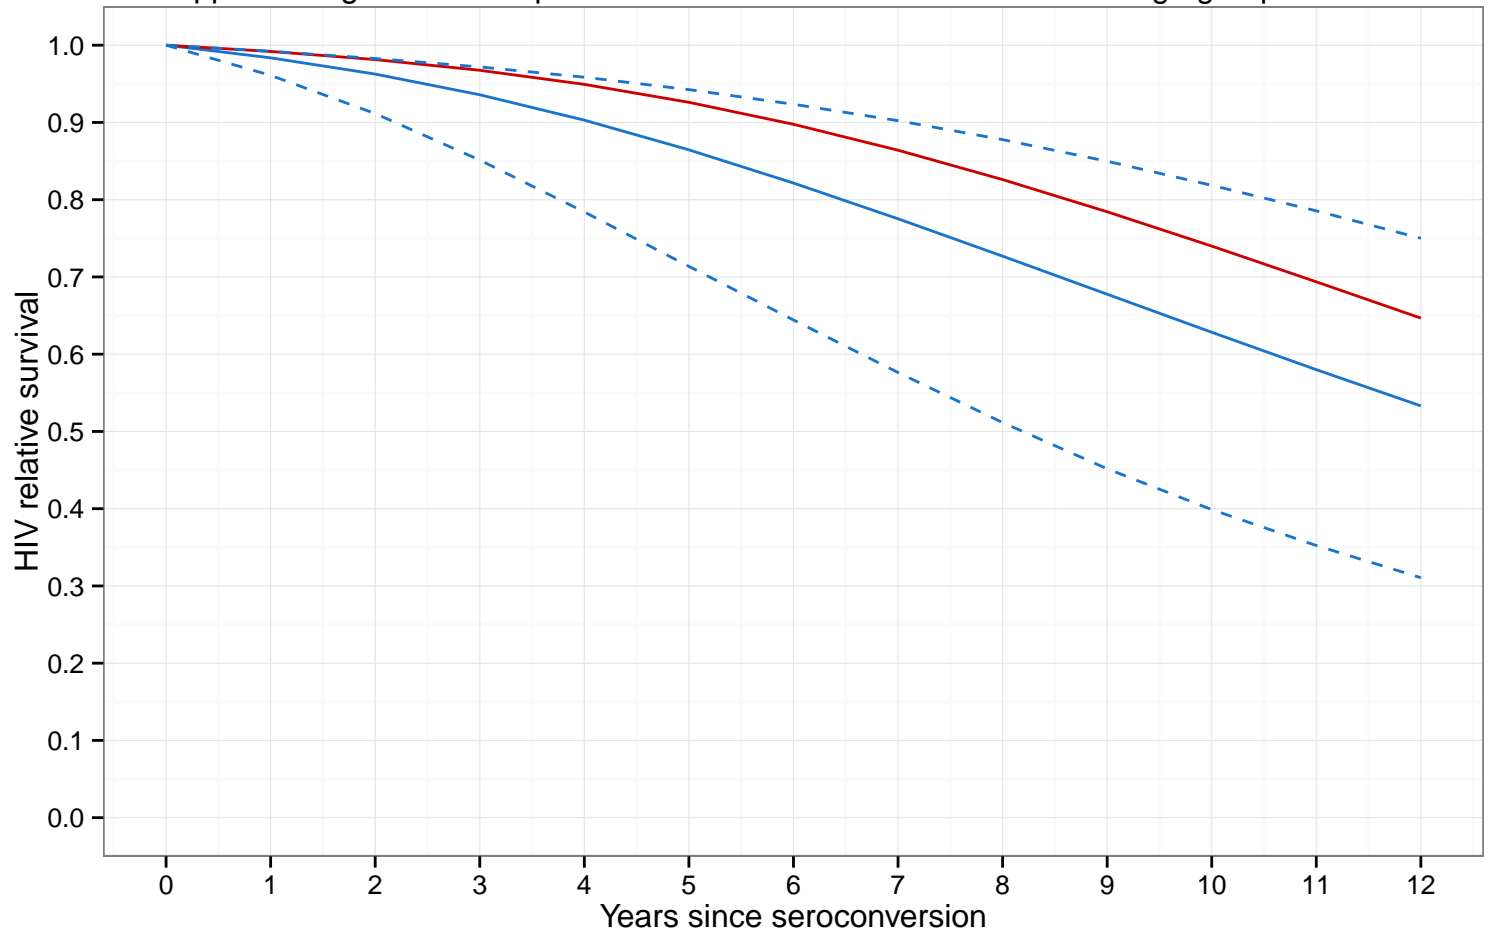

Source — GBD Compartmental Model — UNAIDS Compartmental Model



Appendix Figure 1b. Comparison of HIV relative survival estimates: Age group 35–44

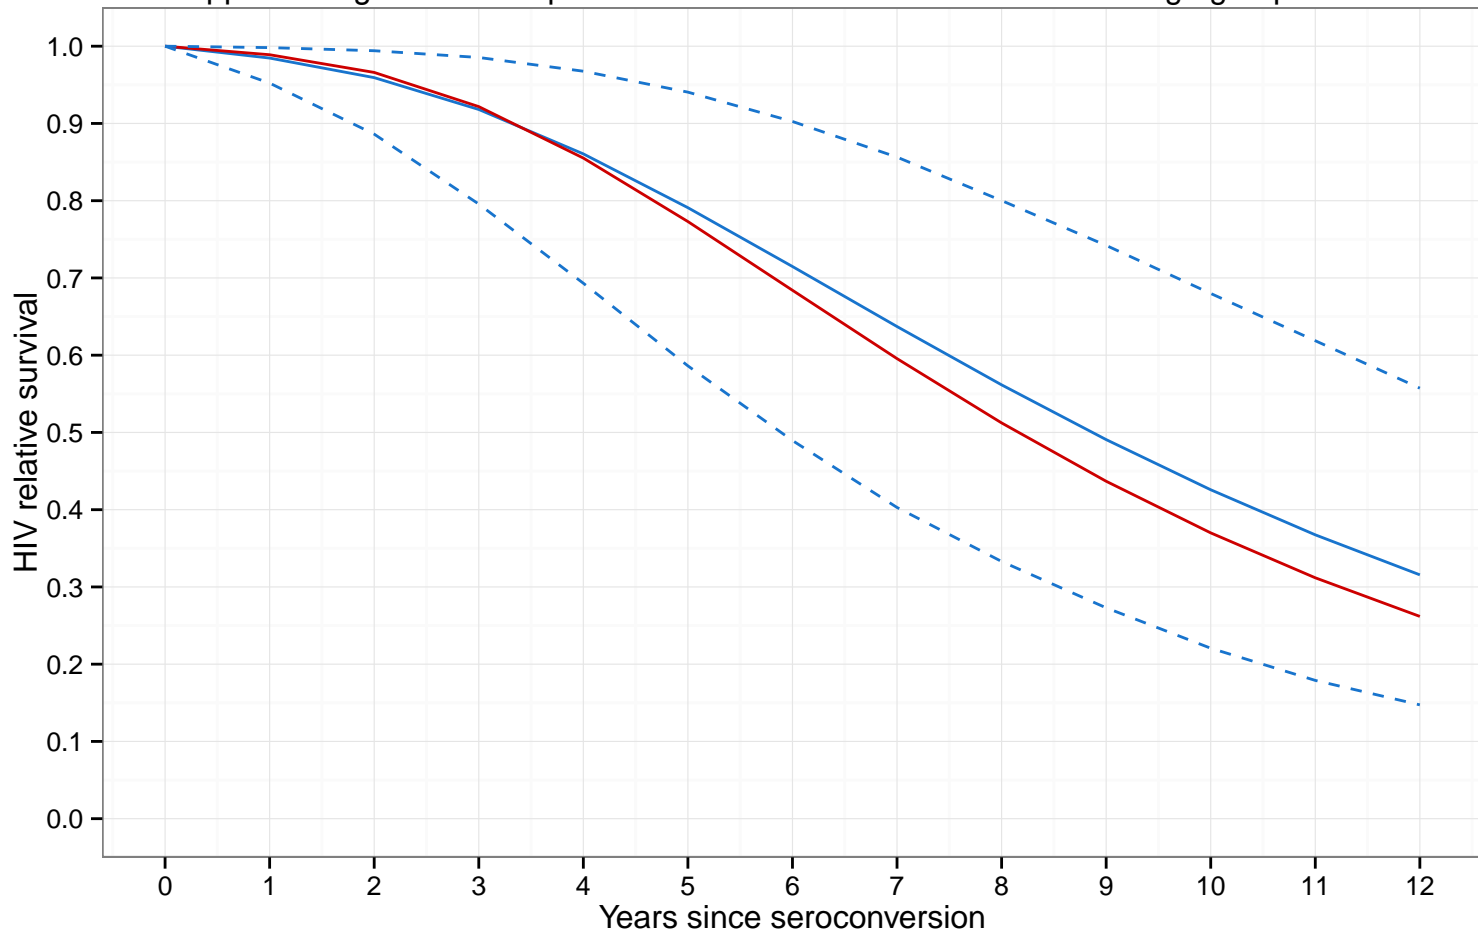

Source — GBD Compartmental Model — UNAIDS Compartmental Model

Appendix Figure 1c. Comparison of HIV relative survival estimates: Age group 45+

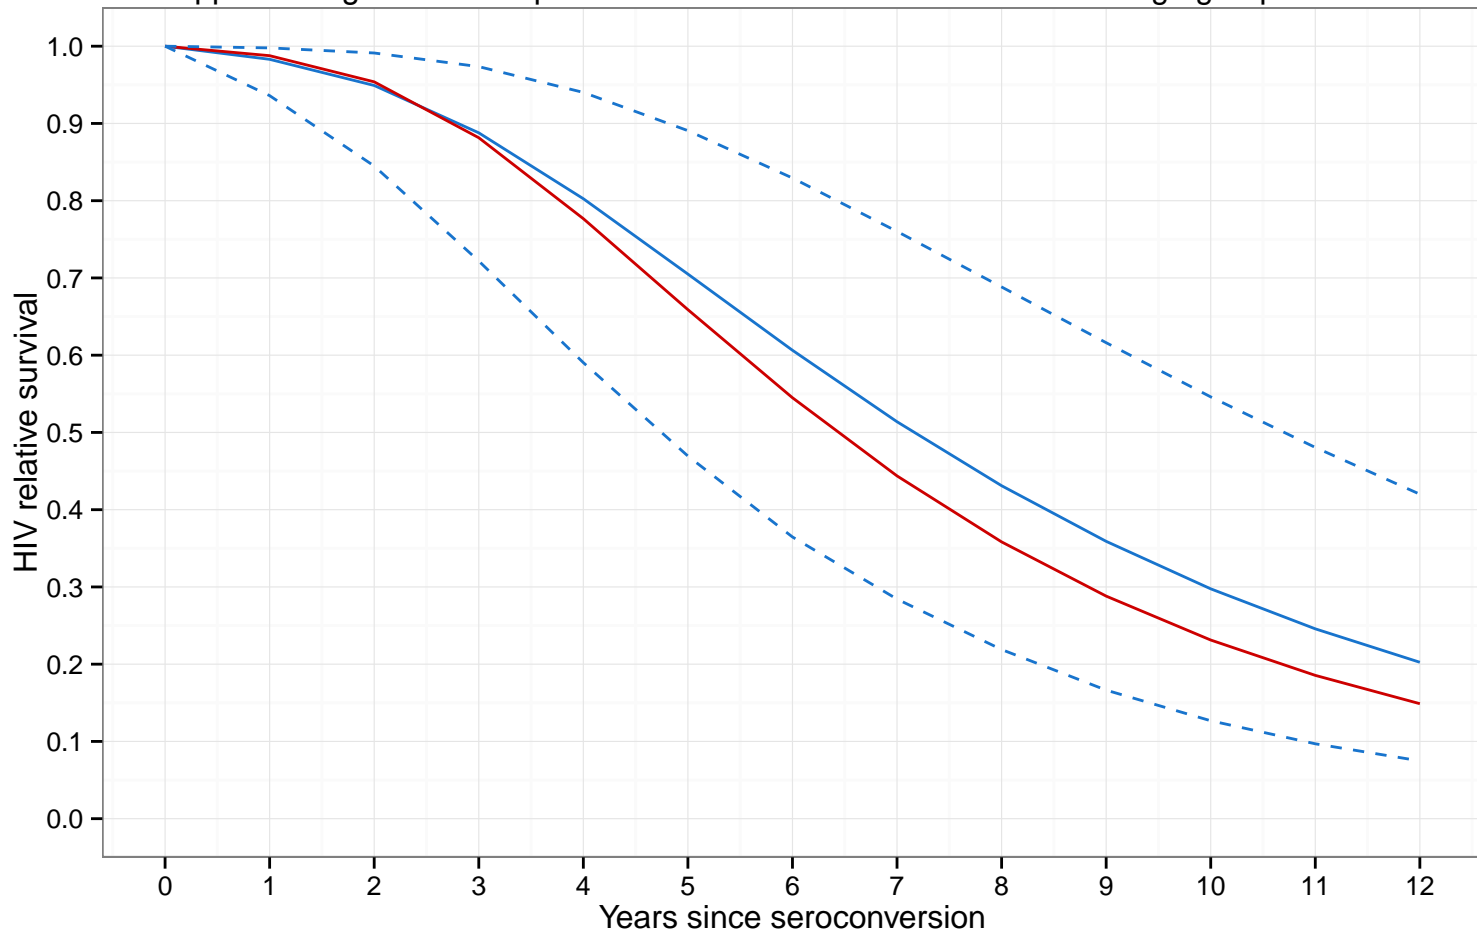

Source — GBD Compartmental Model — UNAIDS Compartmental Model

Appendix Figure 2a. Adult HIV Mortality in Uganda

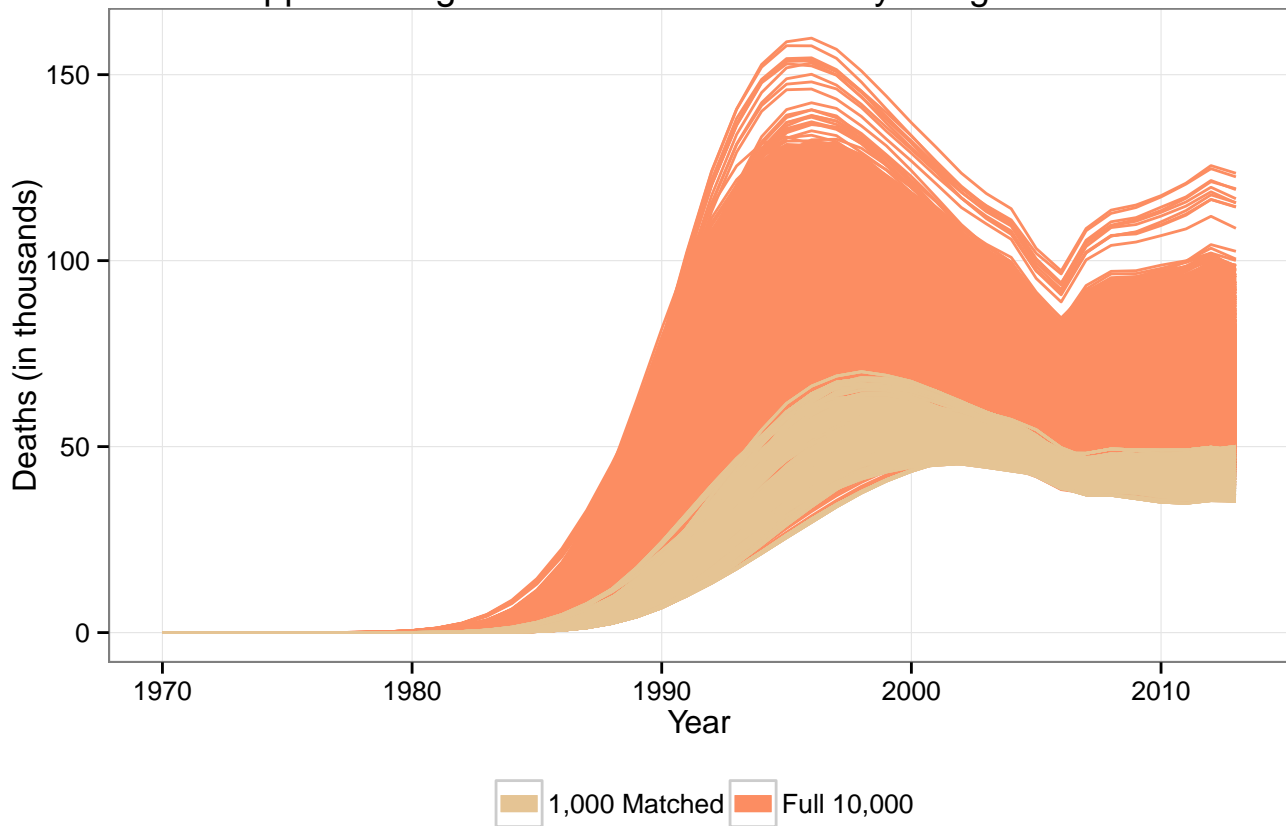

Appendix Figure 2b. Adult HIV Mortality in South Africa

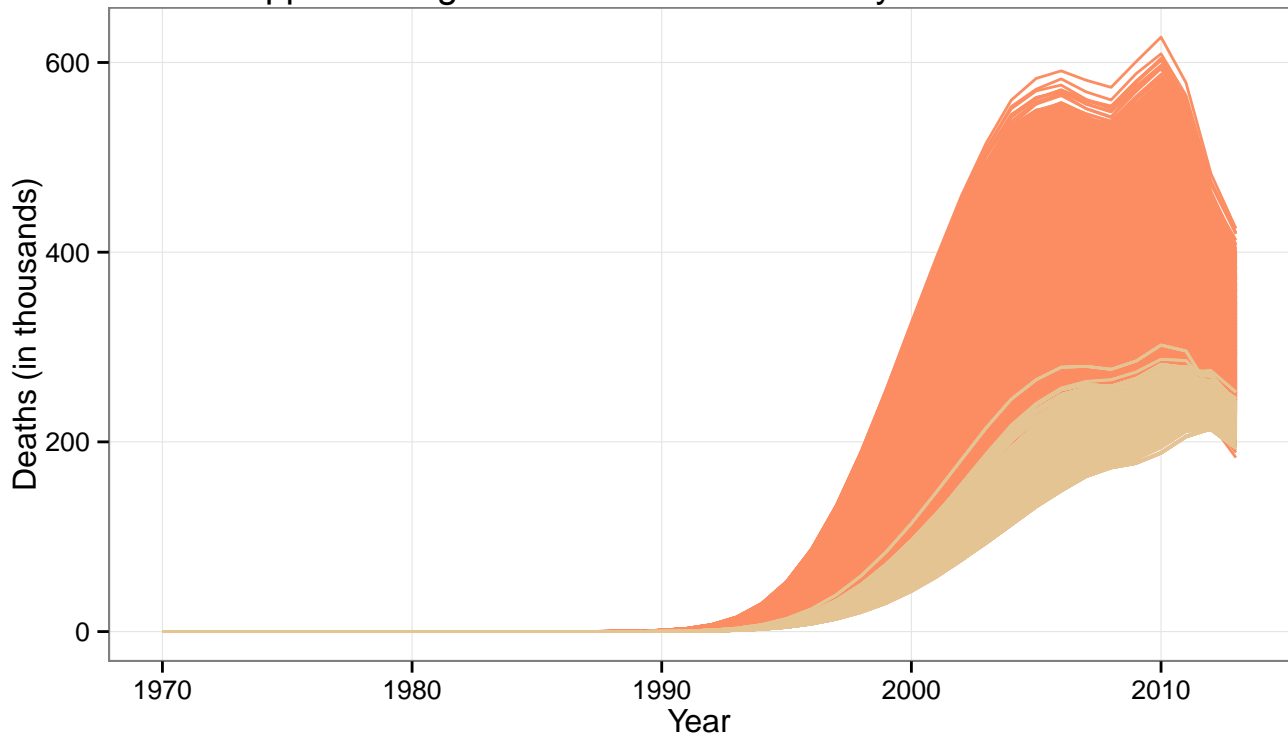

1,000 Matched Full 10,000

Appendix Figure 2c. Adult HIV Mortality in Ghana

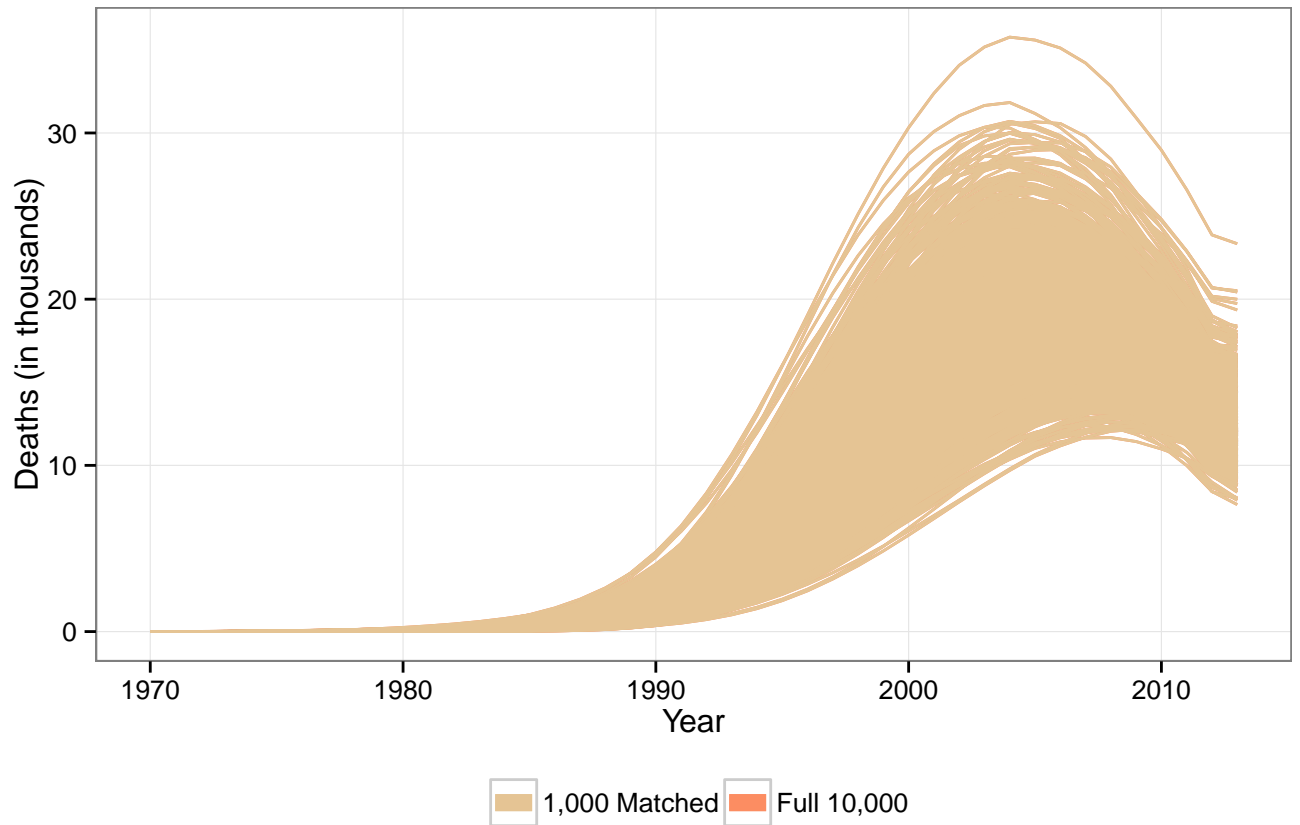

Appendix Figure 3. Effect of back-calculation on estimated malaria deaths

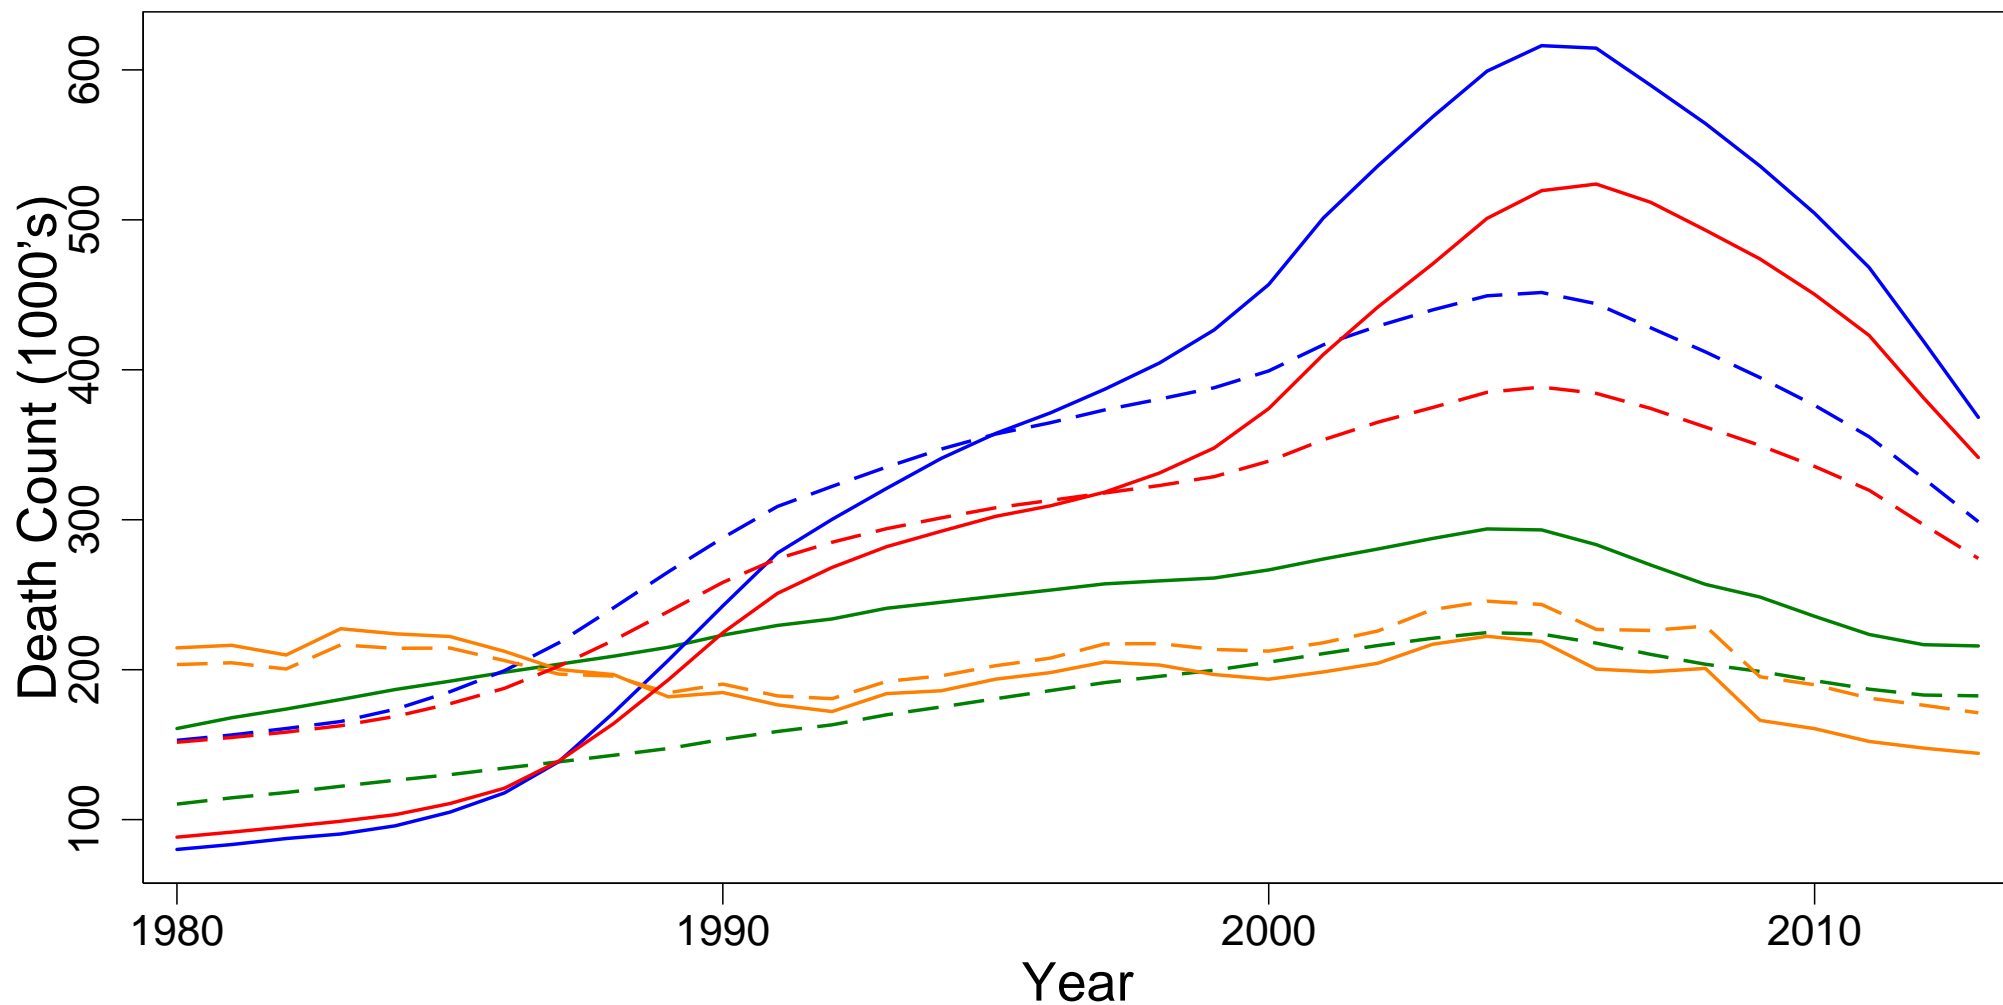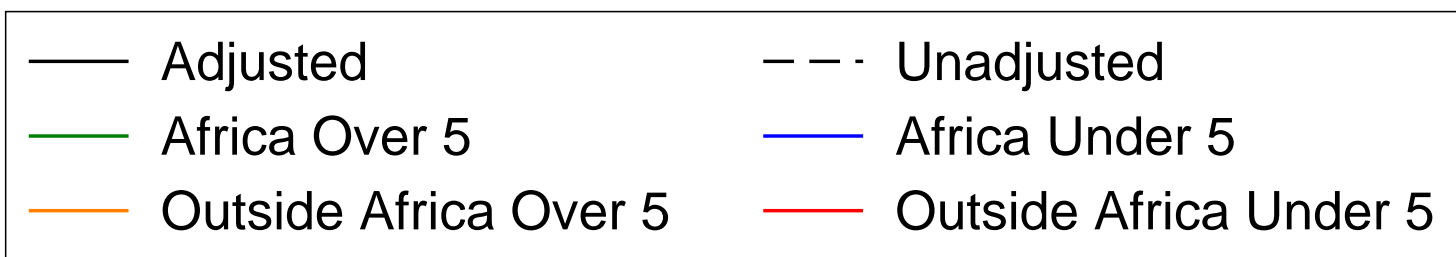

VR Countries Not Adjusted

Appendix Figure 4. Ratio of years of life saved through intervention to prevalent cases in adults over 15 in 2013.

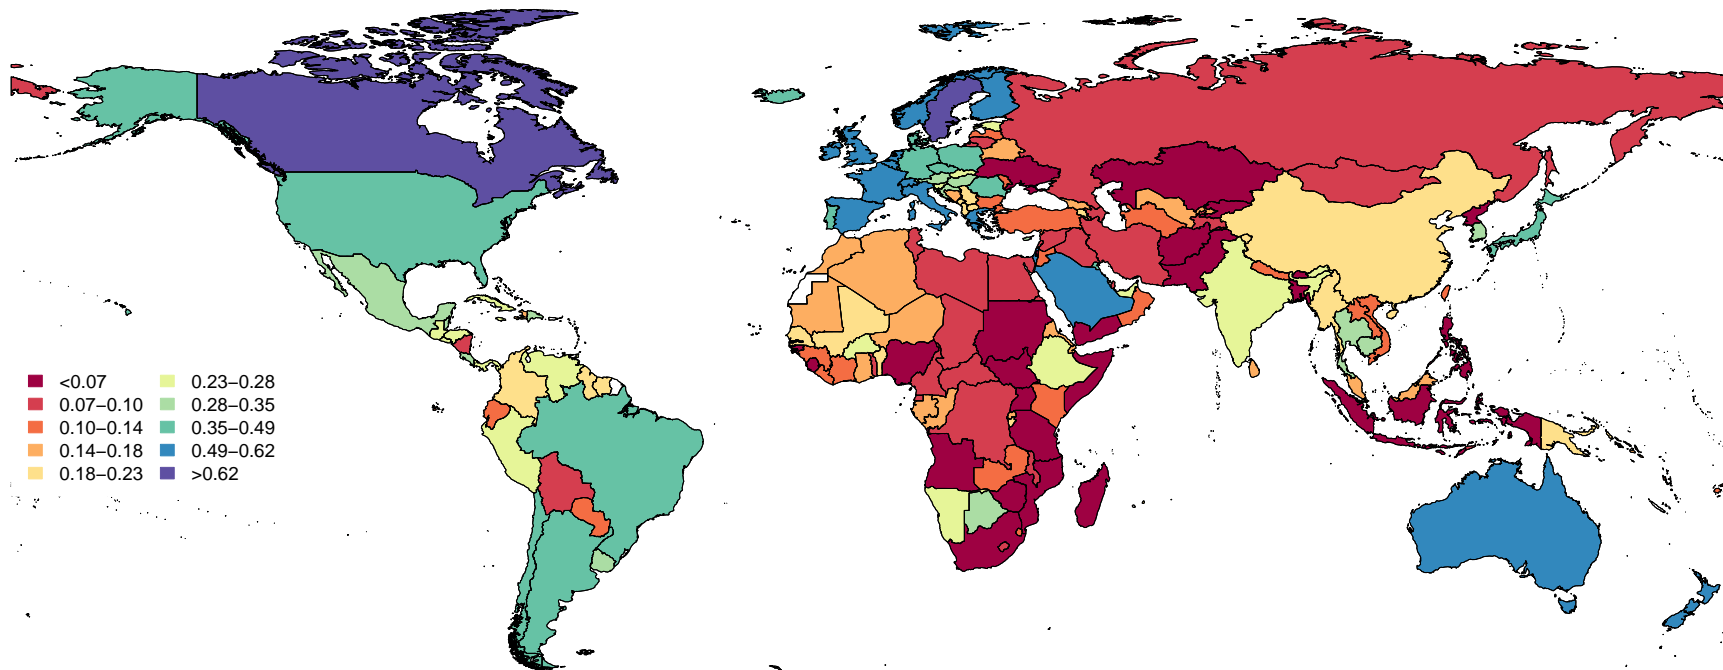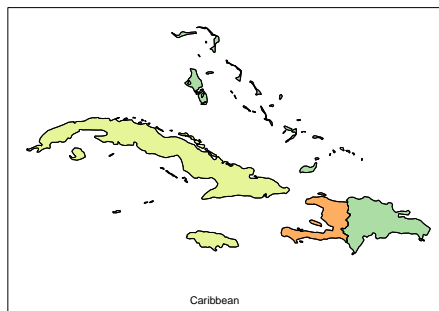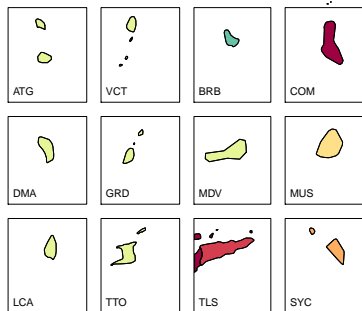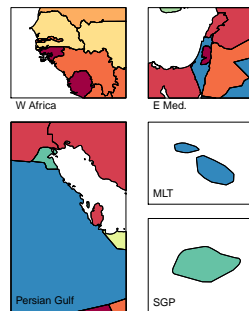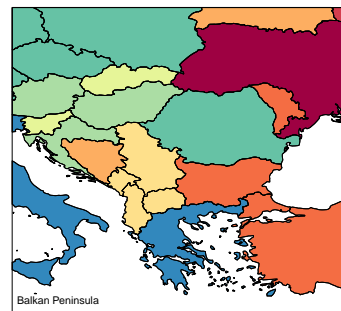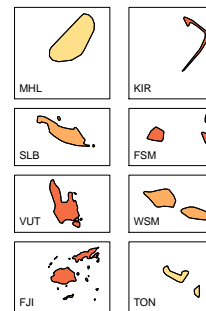

Appendix Figure 5. 95% CIs for GBD CD4 progression parameters compared to UNAIDS

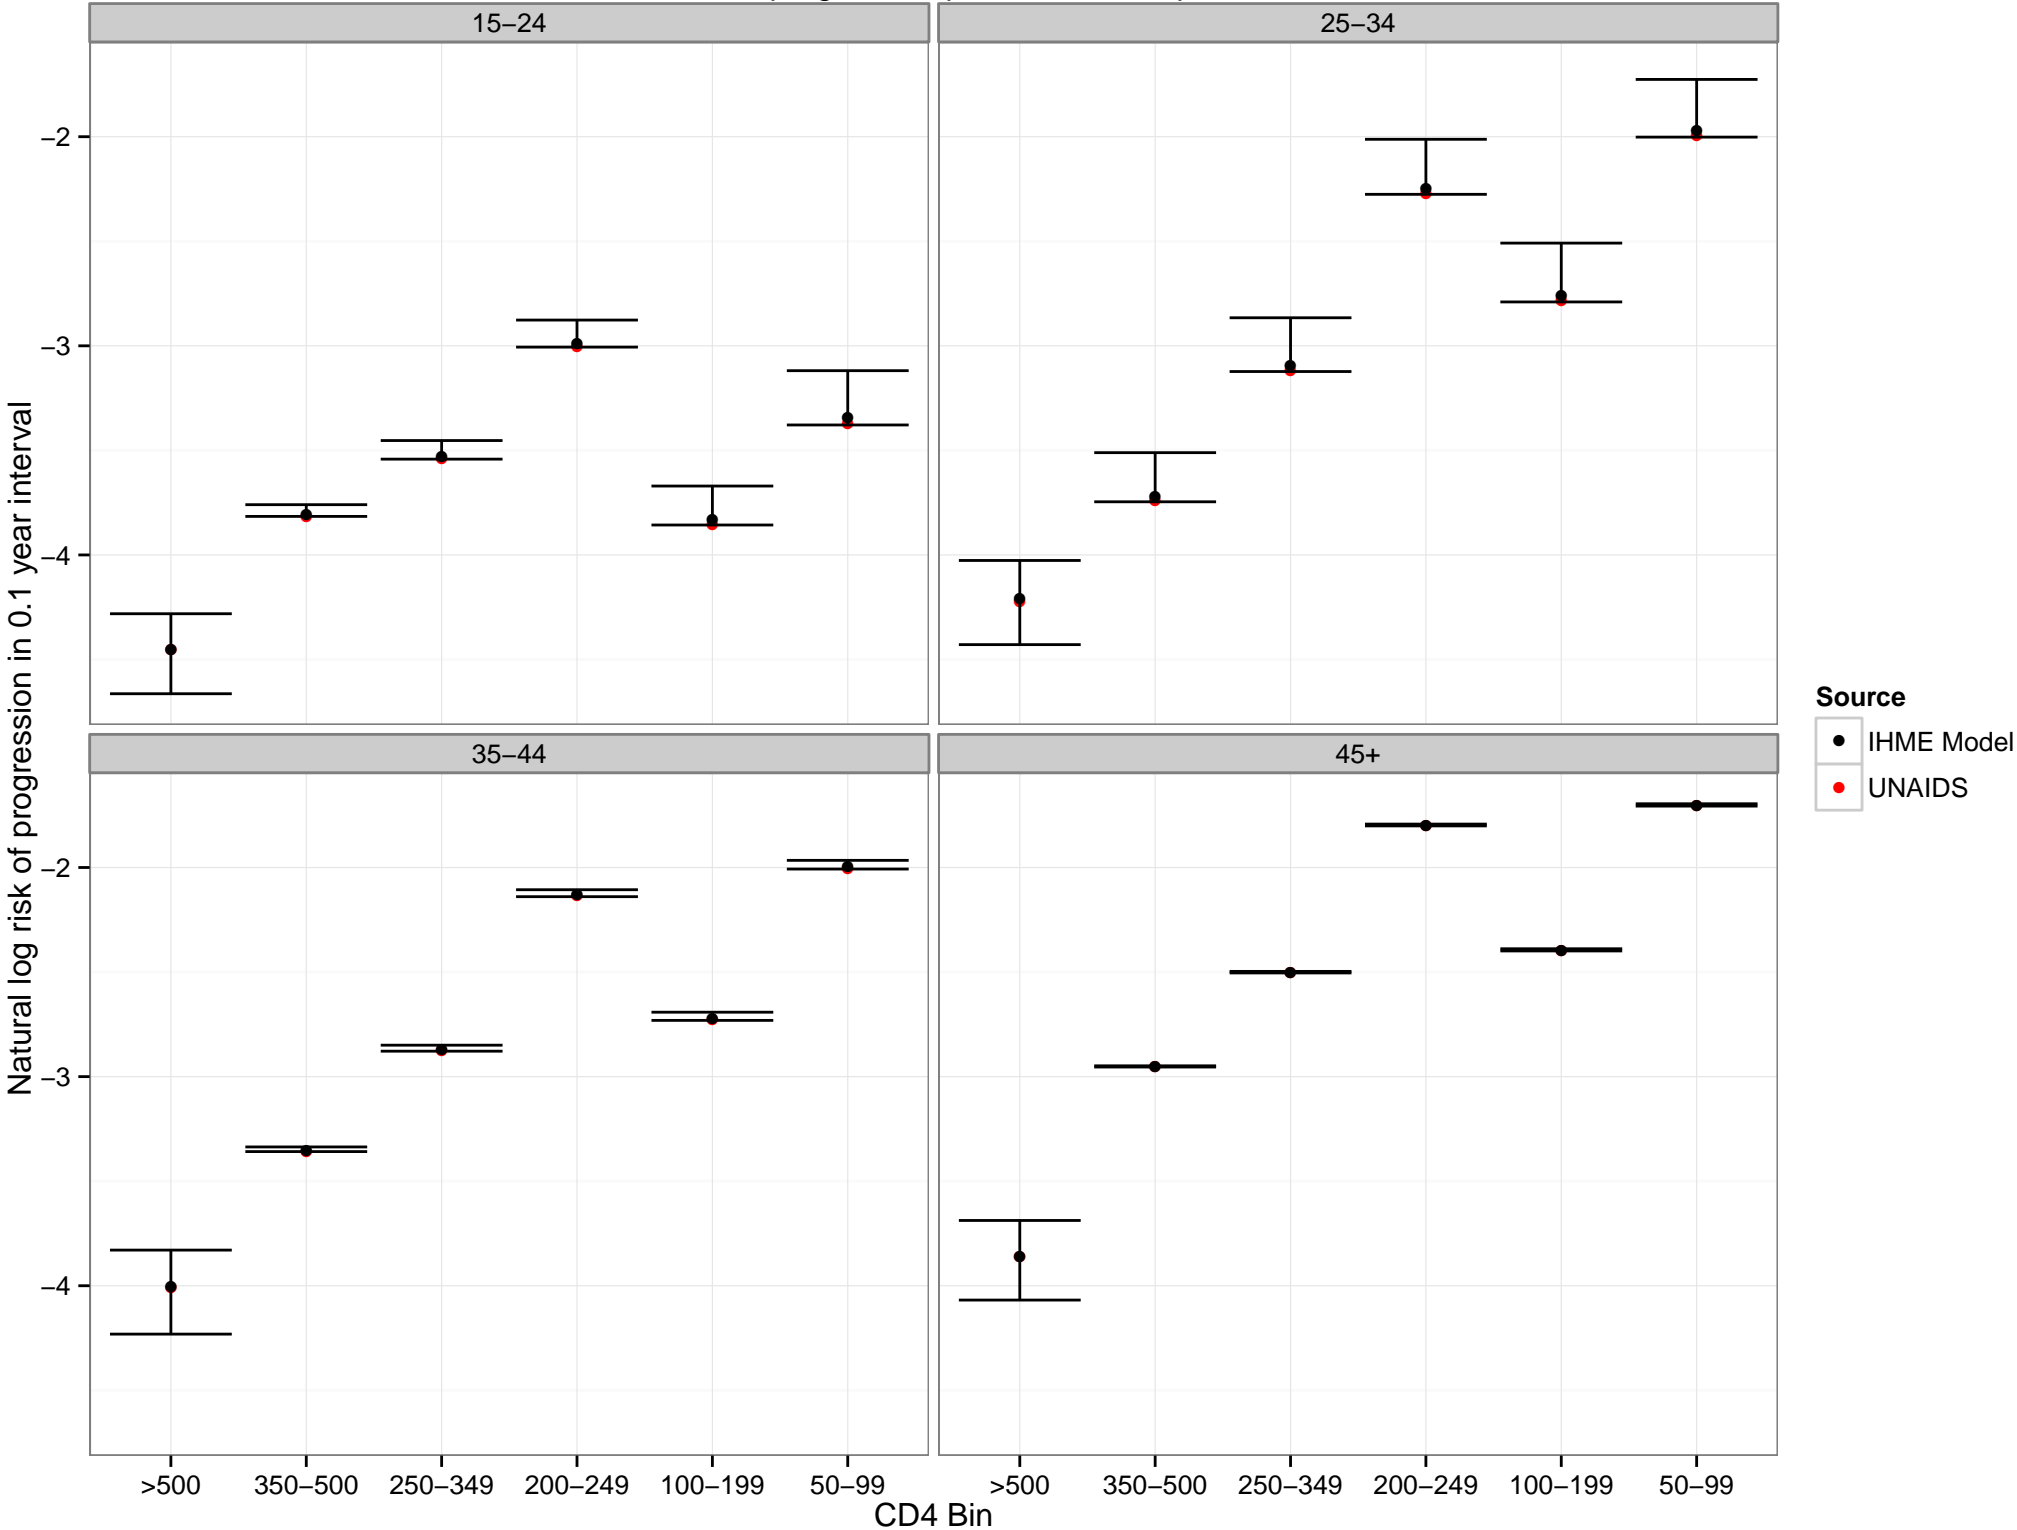



Appendix Figure 6. Comparison of national HIV prevalence survey estimates to GBD and UNAIDS estimates with 95% confidence intervals. Each graph represents age-specific estimates for a particular country, survey year, and sex.

BDI 2010 Males

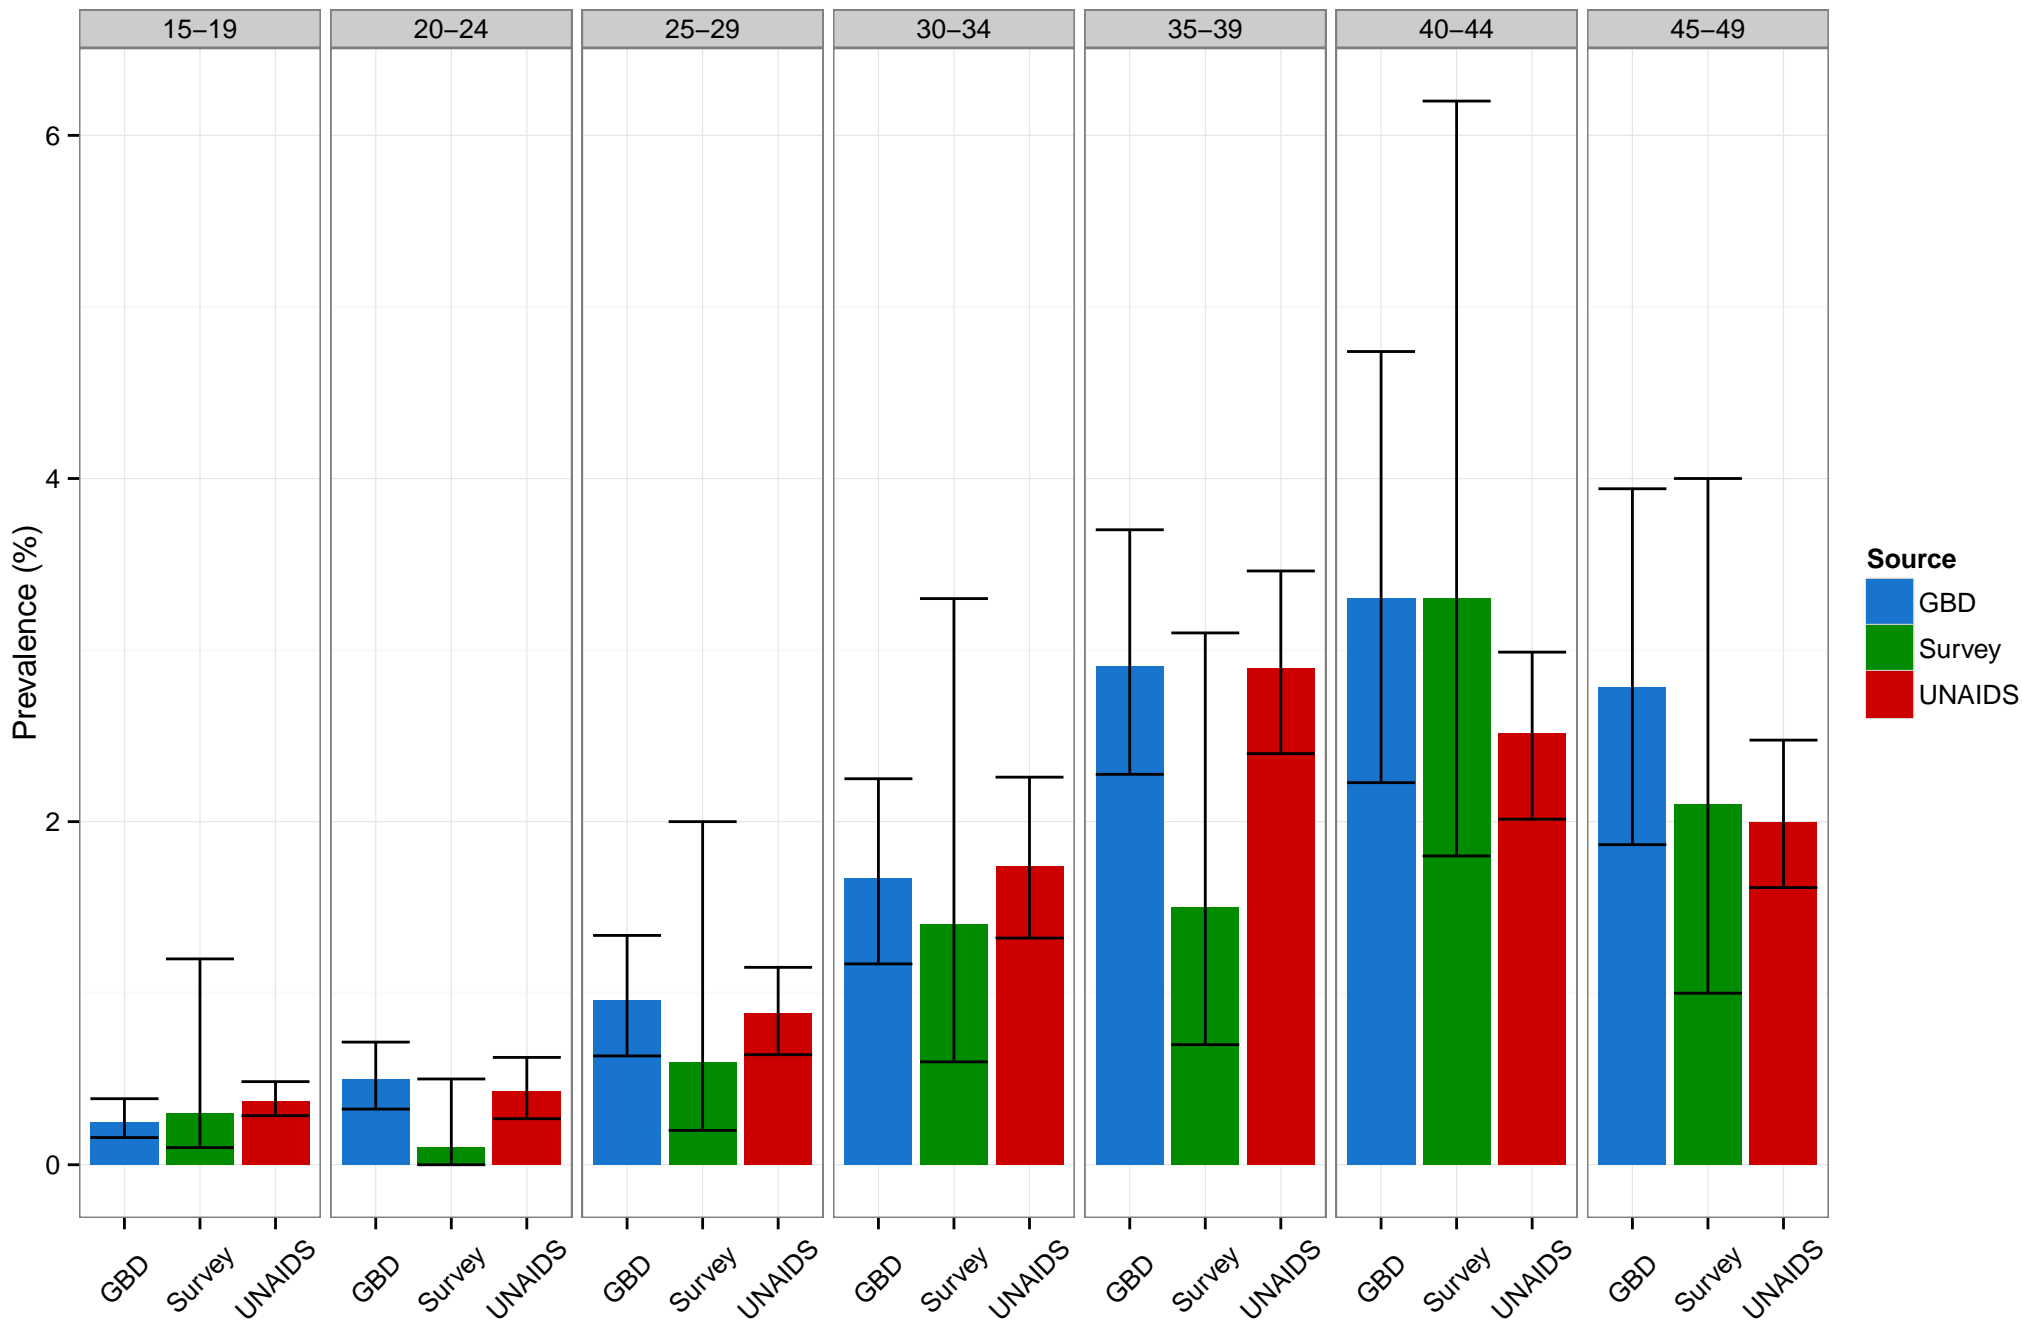

# HIV prevalence comparison to survey estimates by age-group with 95% confidence intervals

BDI 2010 Females

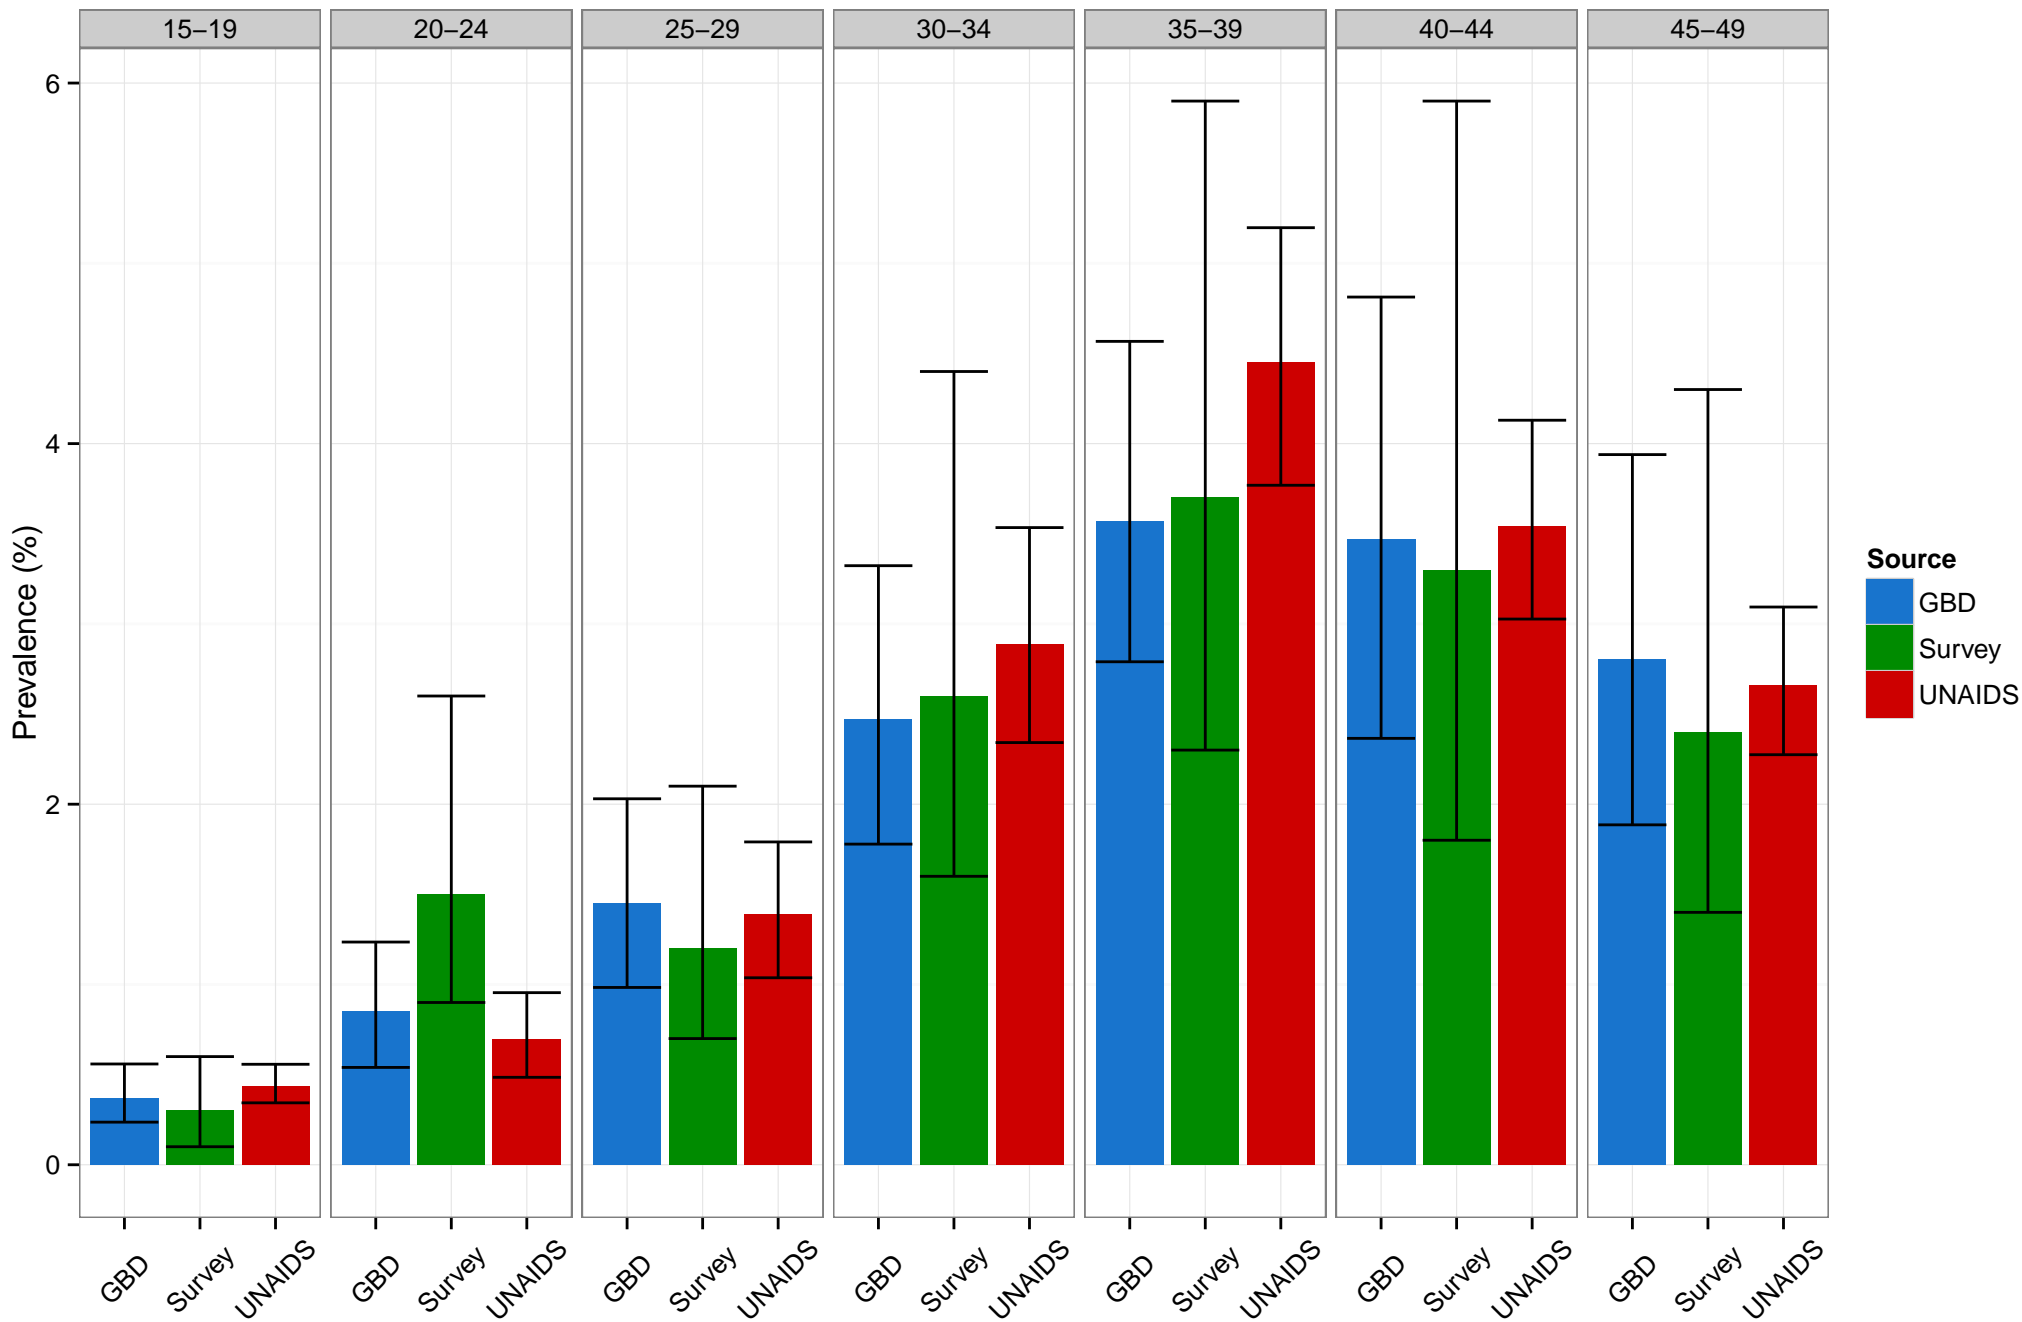

# HIV prevalence comparison to survey estimates by age-group with 95% confidence intervals

BEN 2006 Males

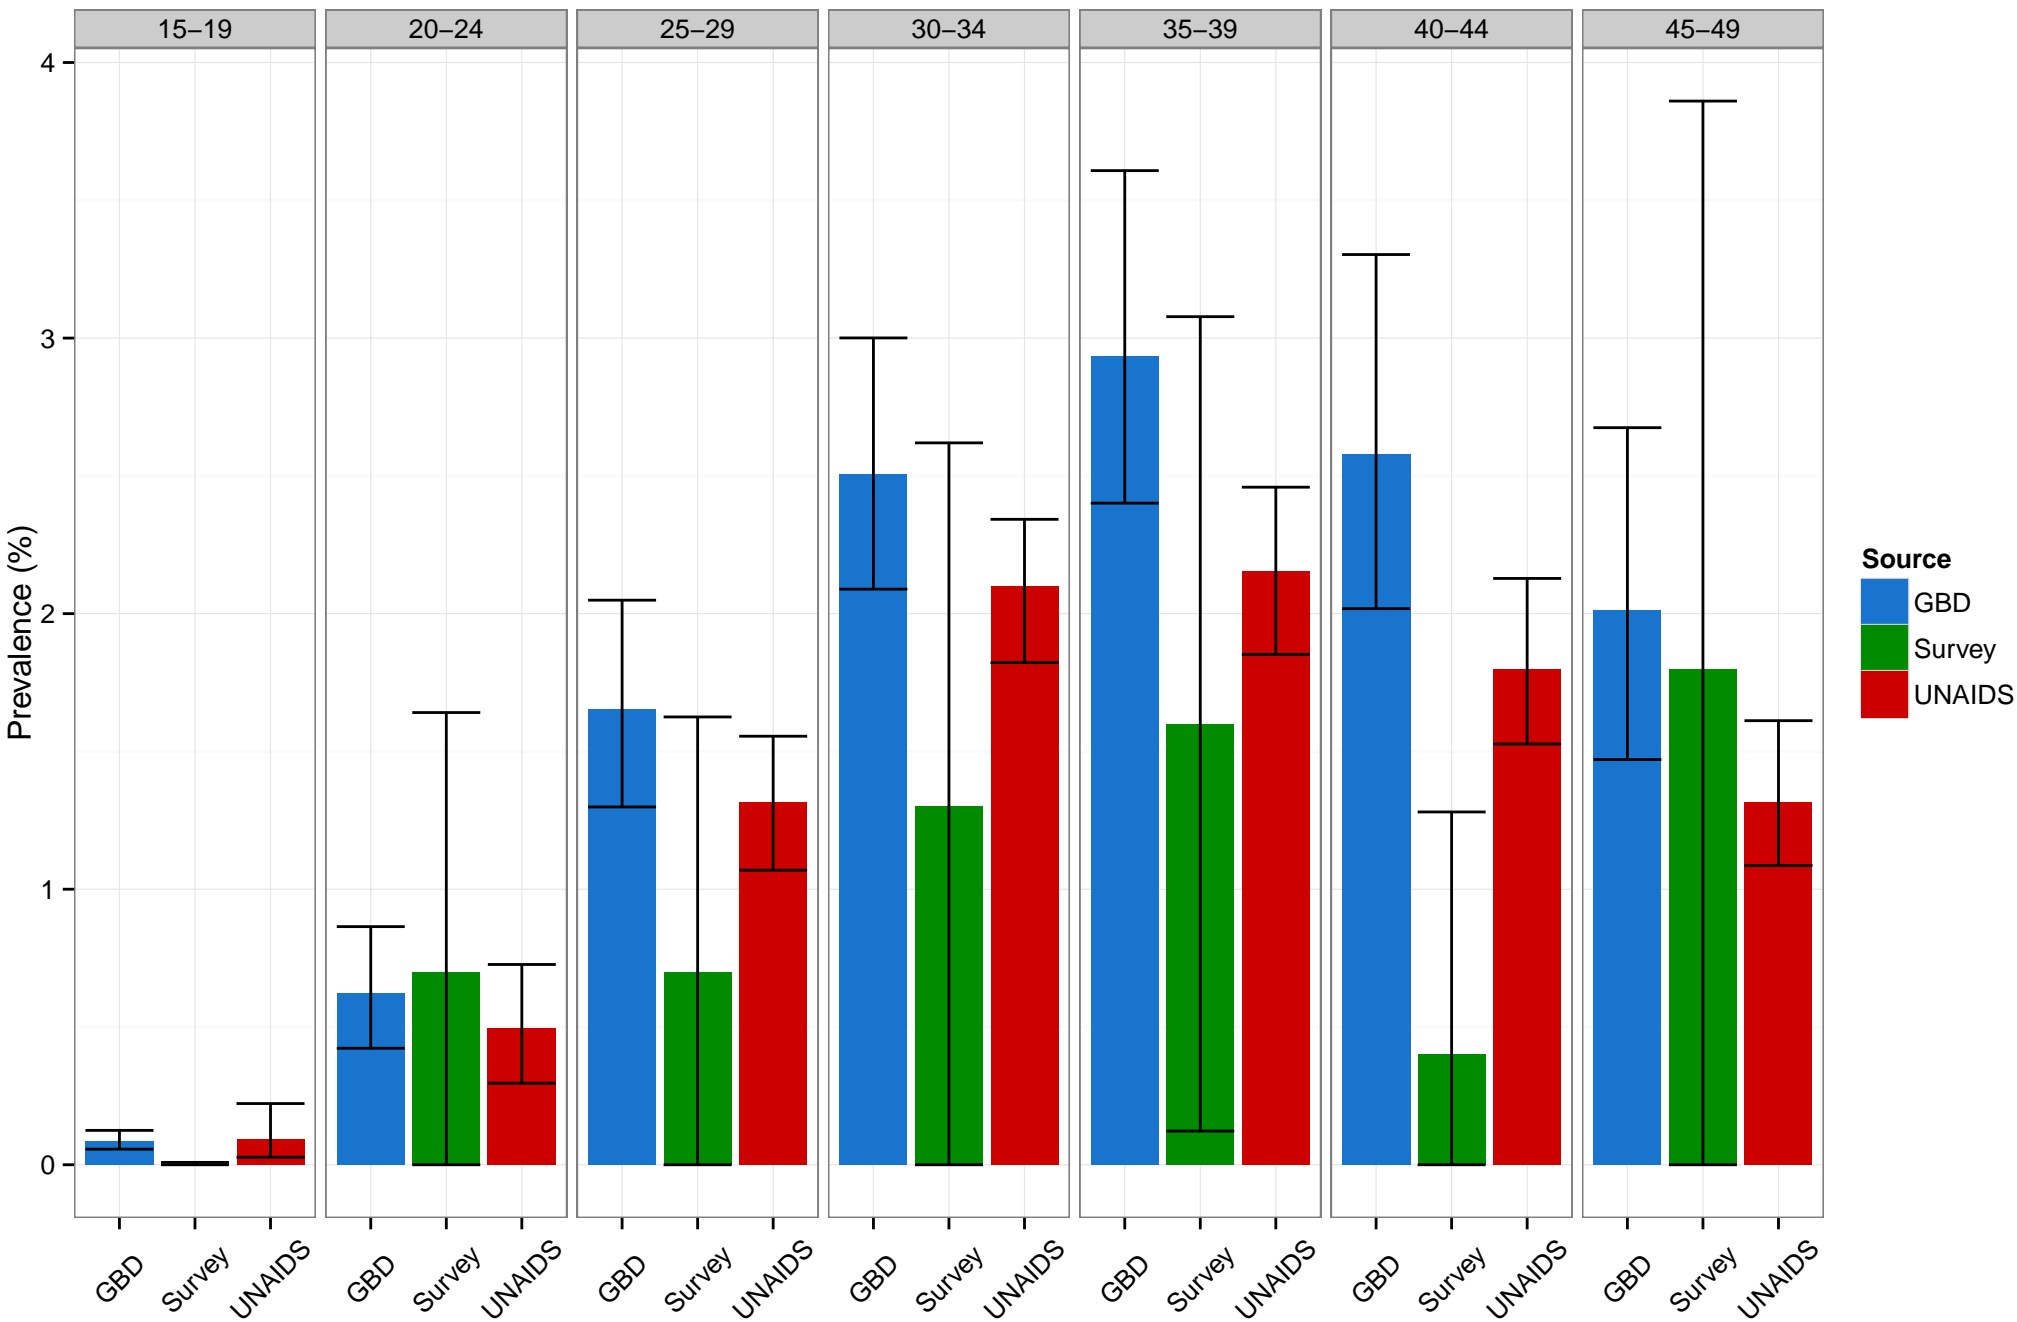

# HIV prevalence comparison to survey estimates by age-group with 95% confidence intervals

BEN 2006 Females

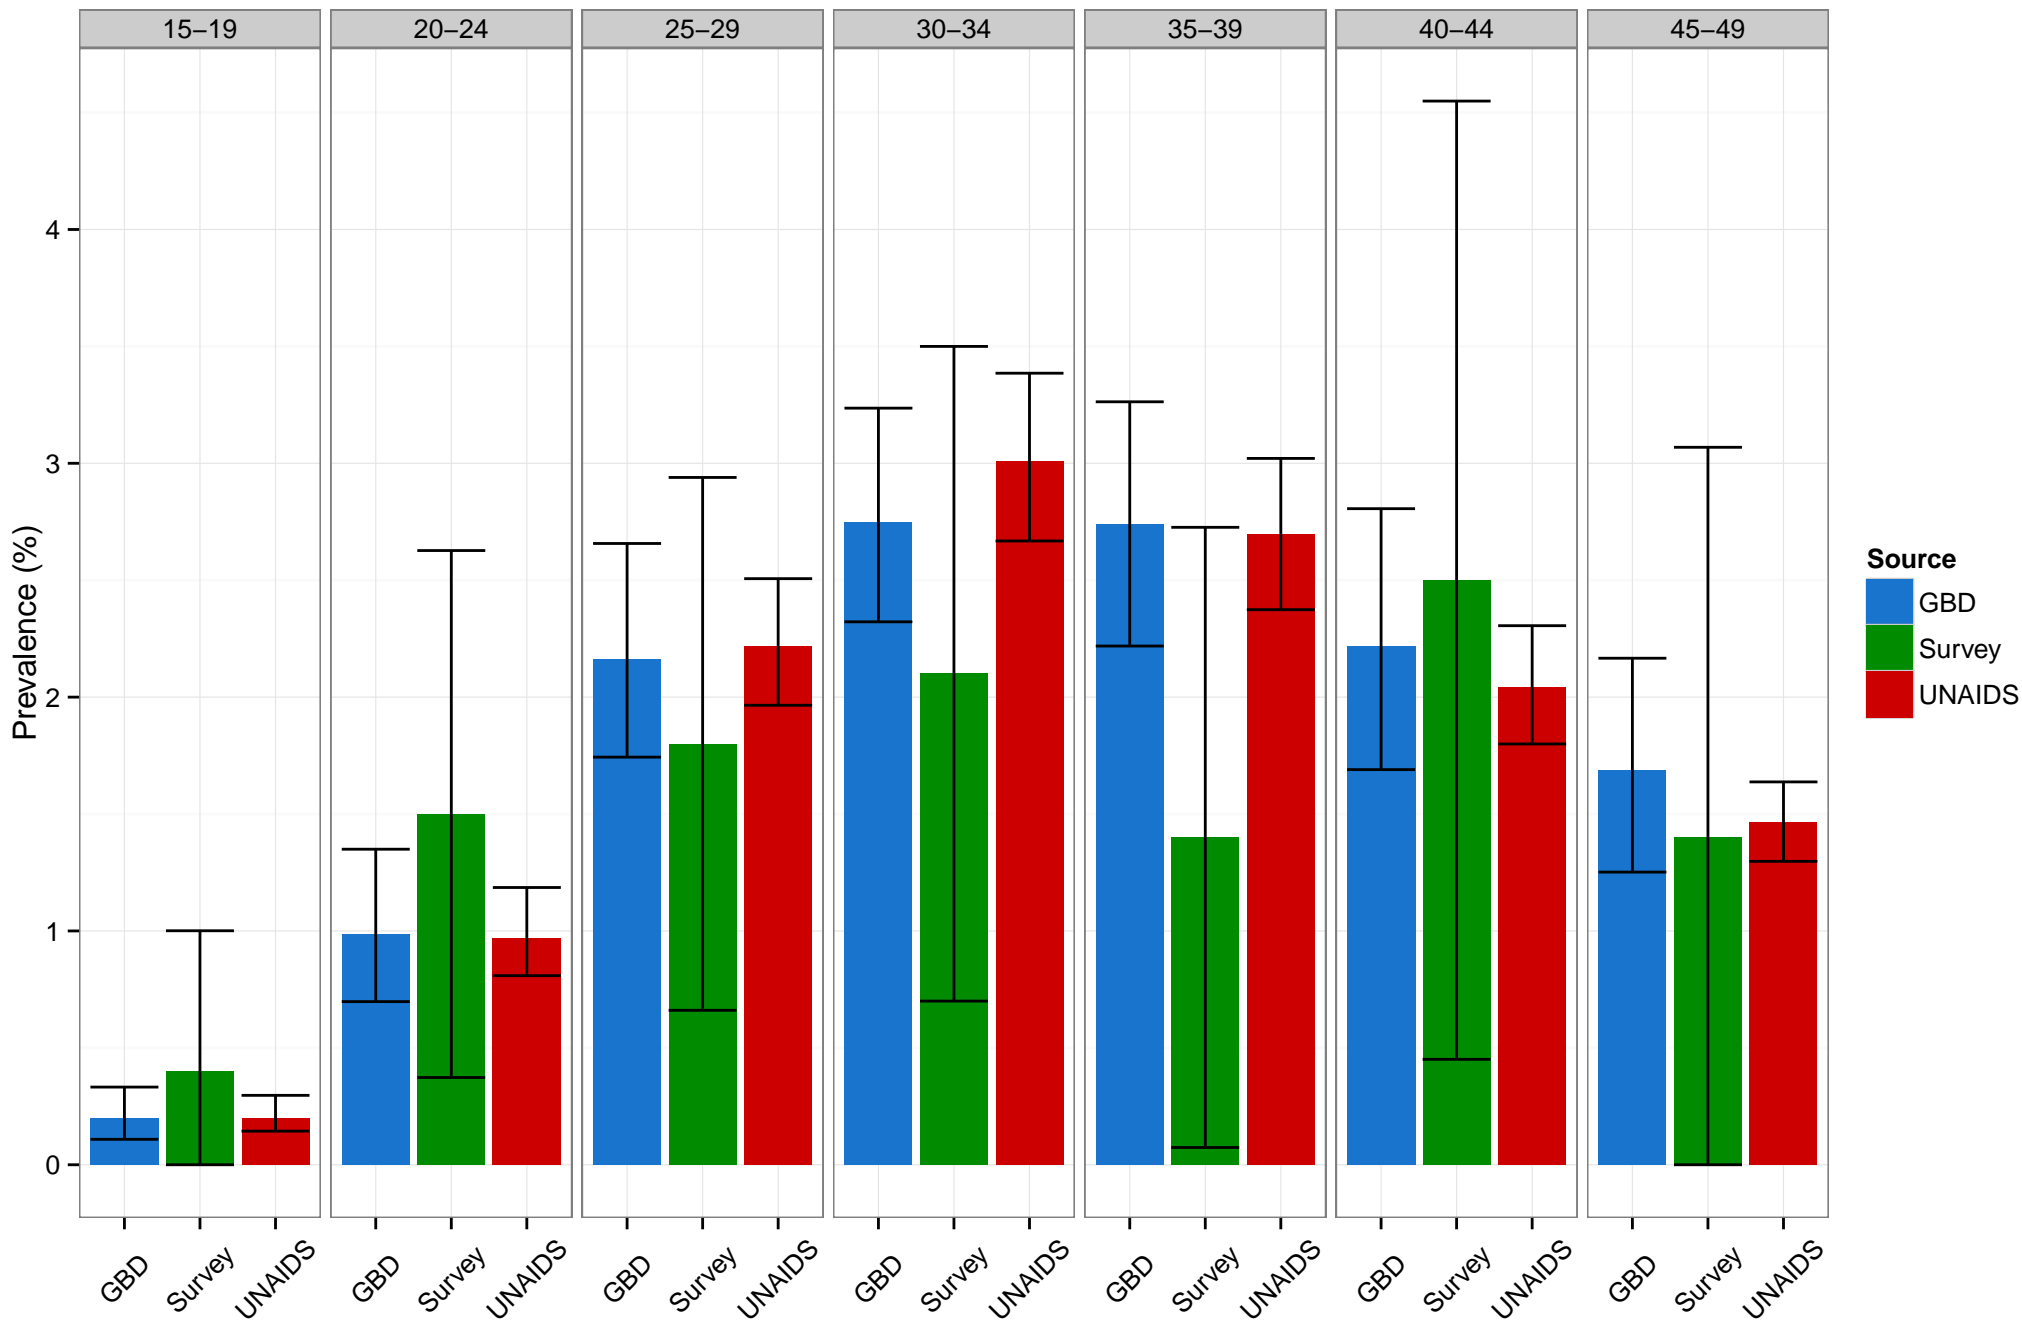

# HIV prevalence comparison to survey estimates by age-group with 95% confidence intervals

BEN 2011–2012 Males

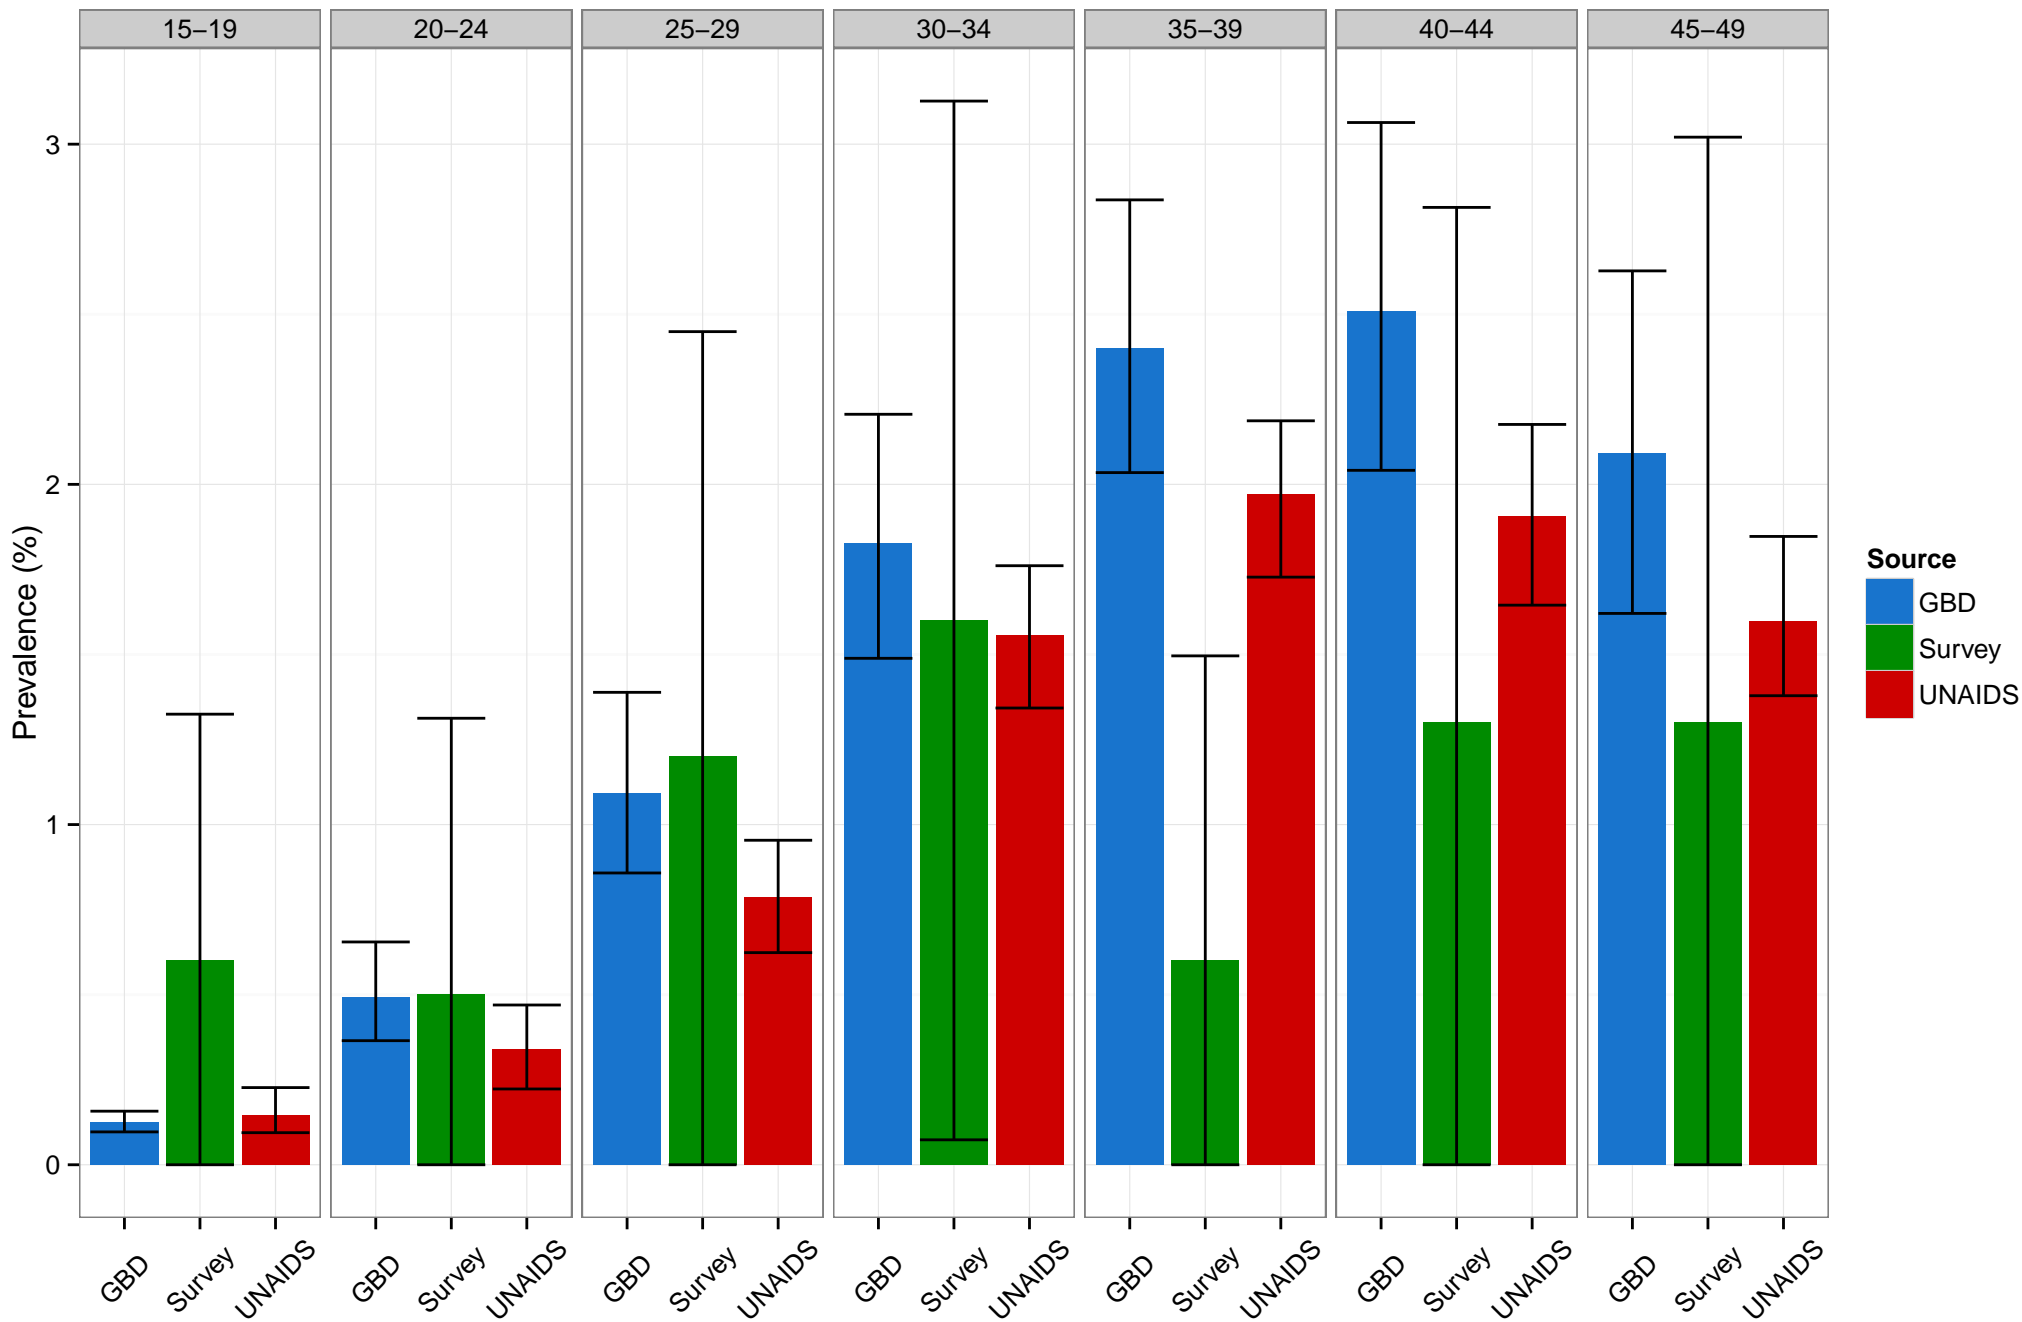

# HIV prevalence comparison to survey estimates by age-group with 95% confidence intervals

BEN 2011–2012 Females

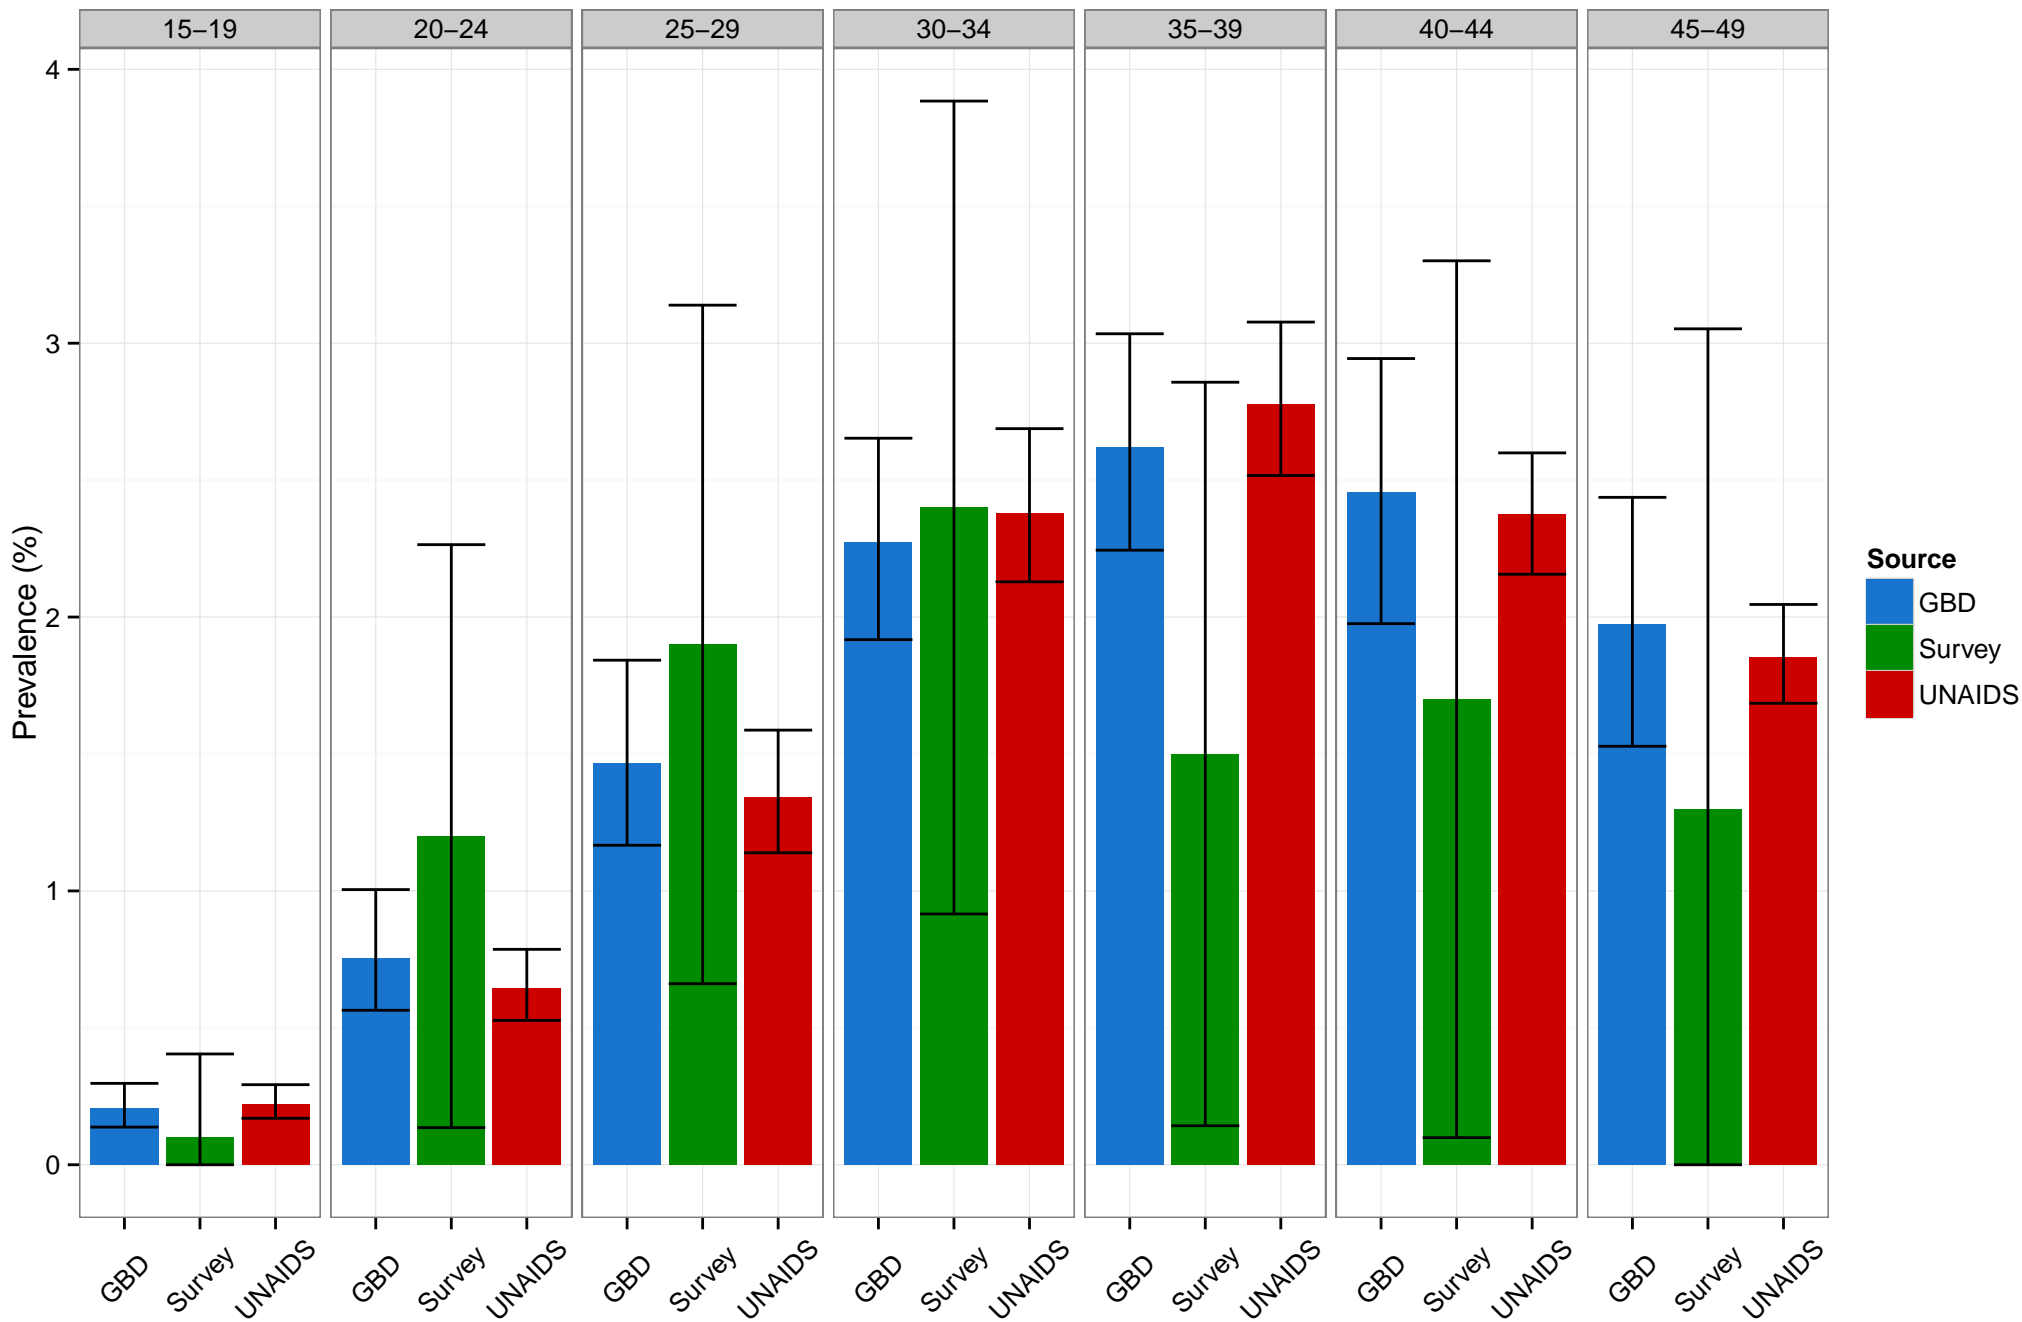

# HIV prevalence comparison to survey estimates by age-group with 95% confidence intervals

BFA 2003 Males

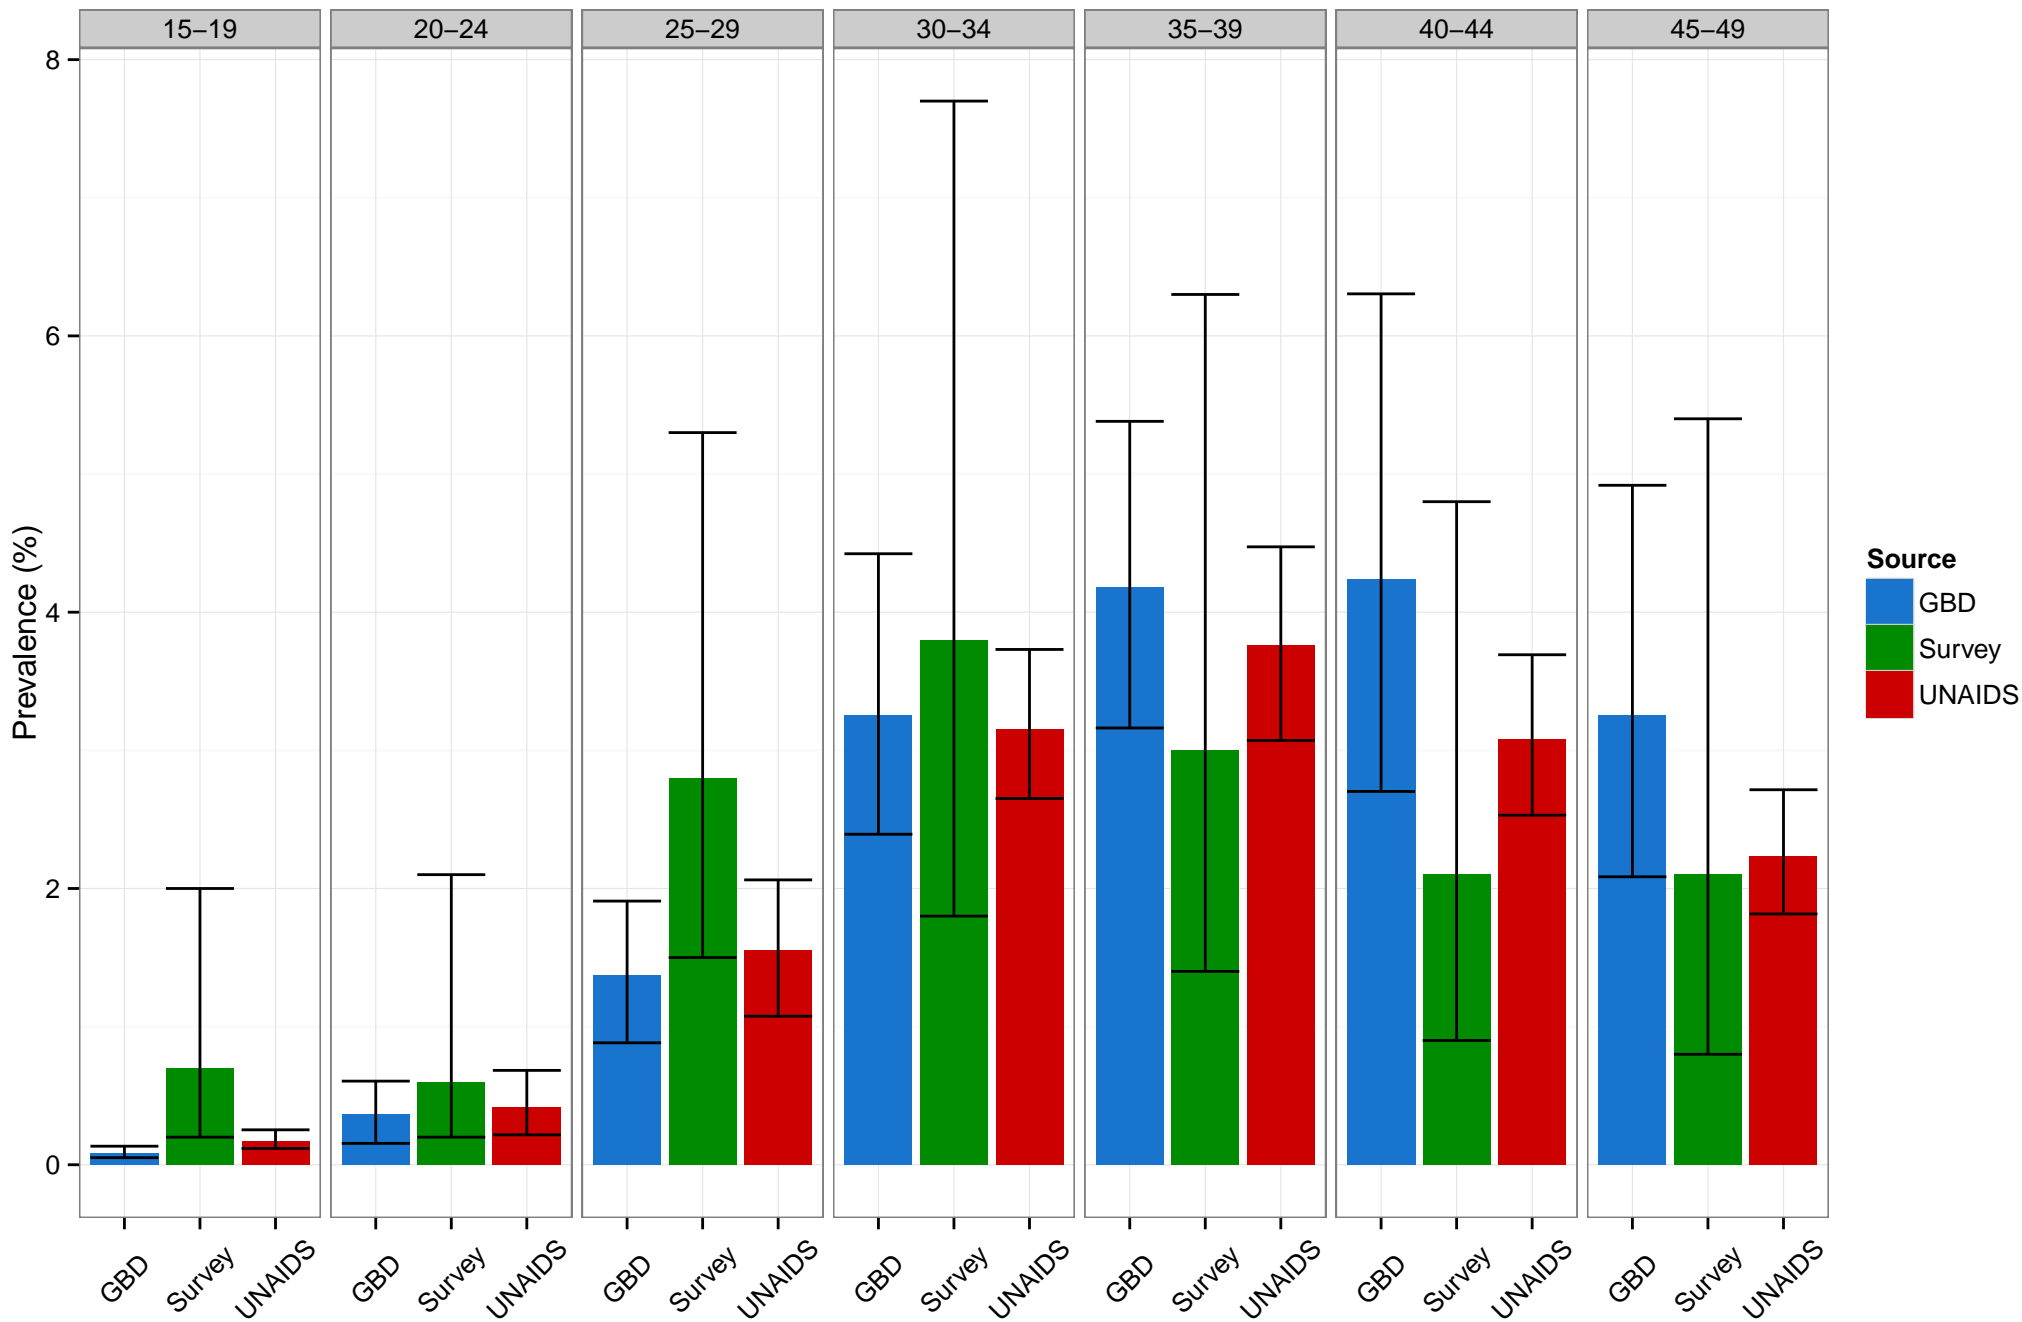

# HIV prevalence comparison to survey estimates by age-group with 95% confidence intervals

BFA 2003 Females

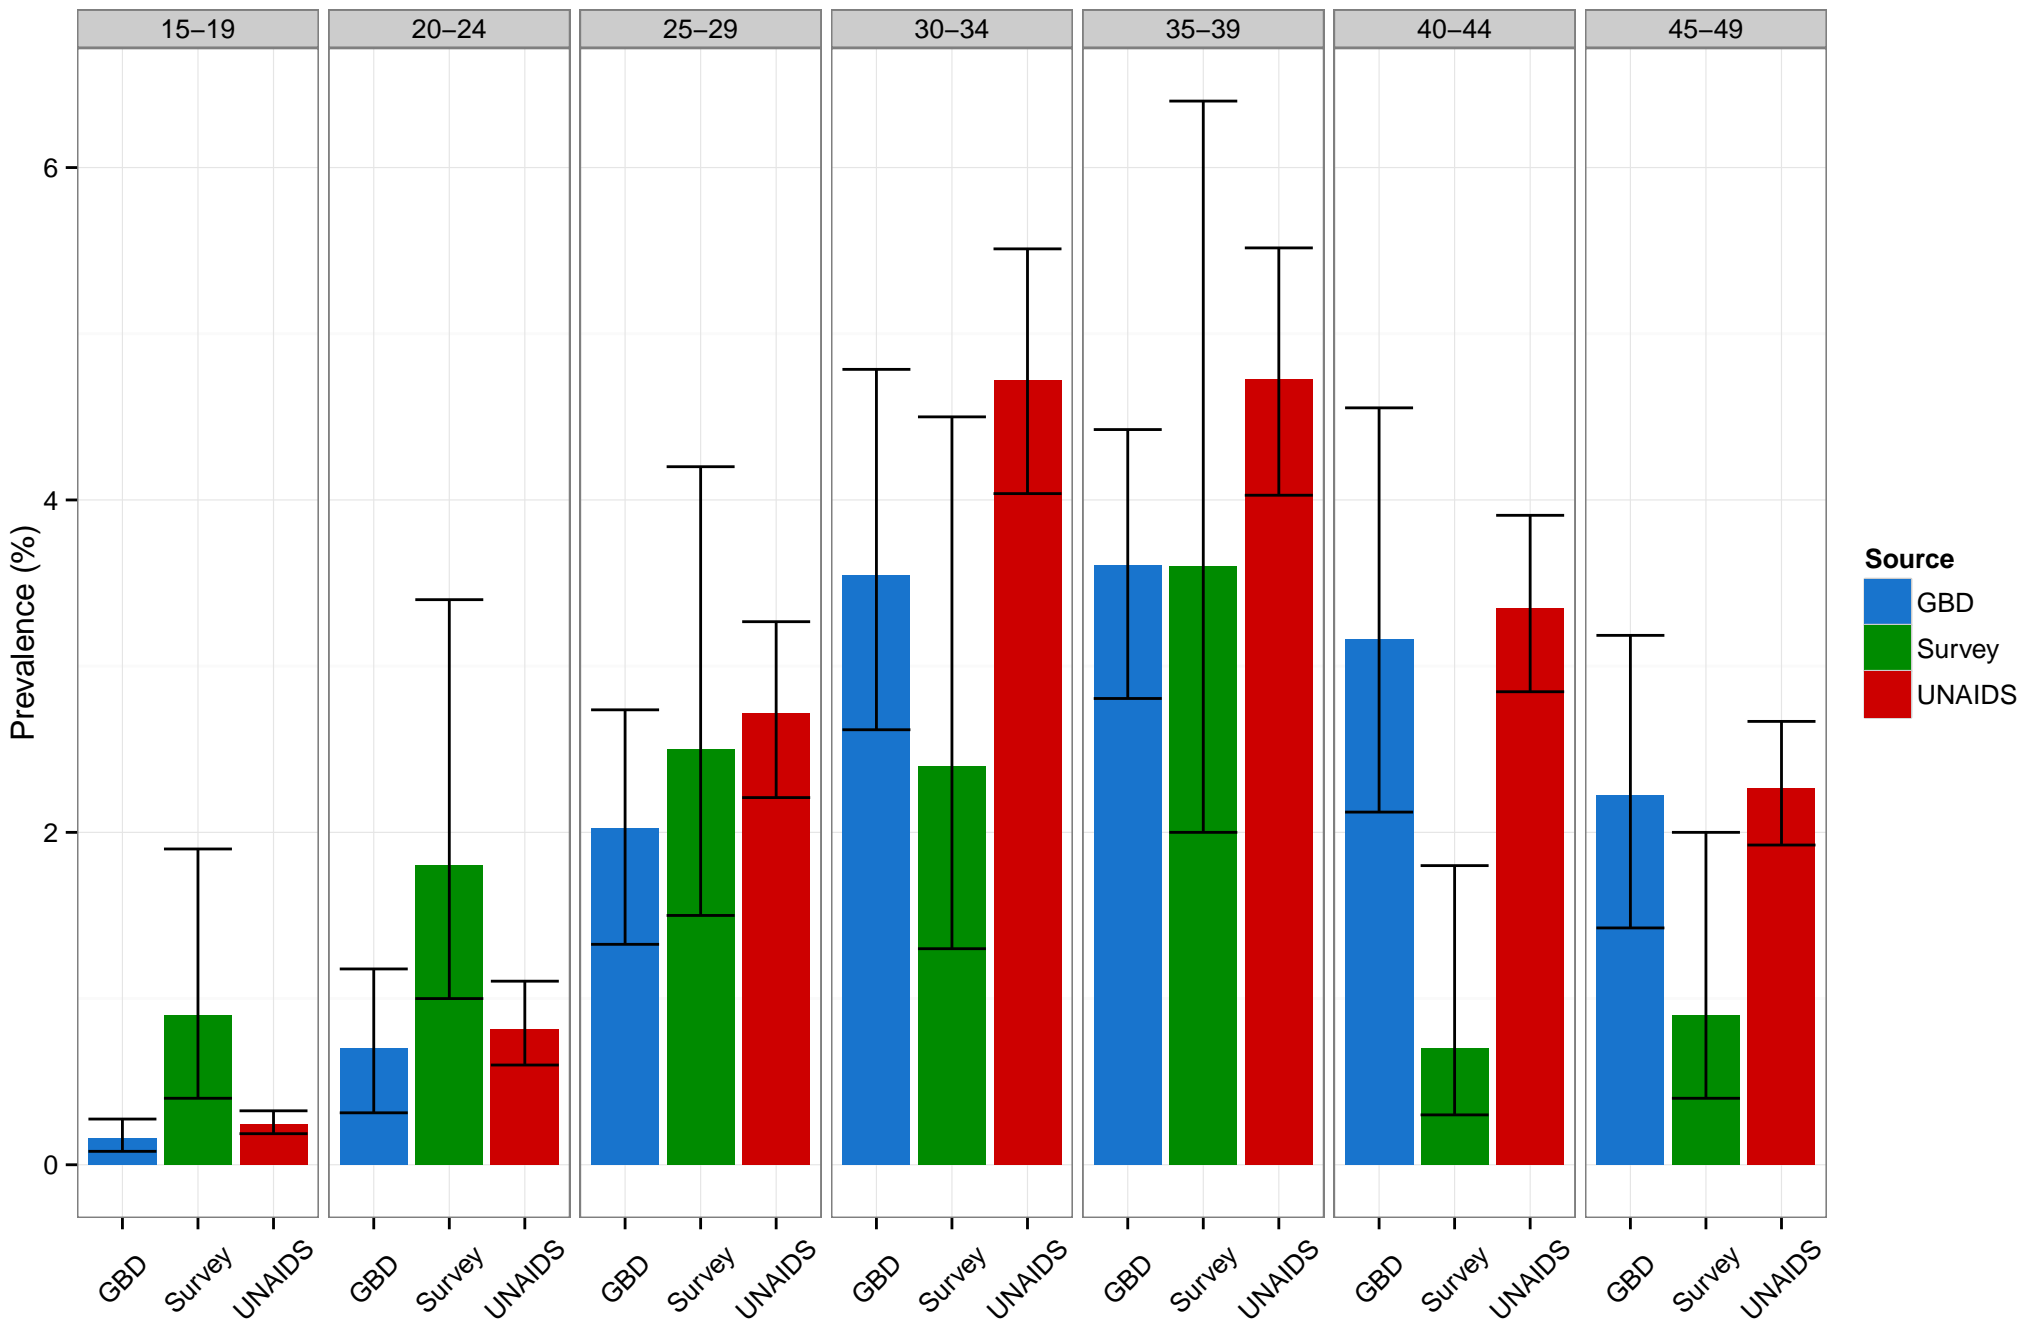



# HIV prevalence comparison to survey estimates by age-group with 95% confidence intervals

BFA 2010 Males

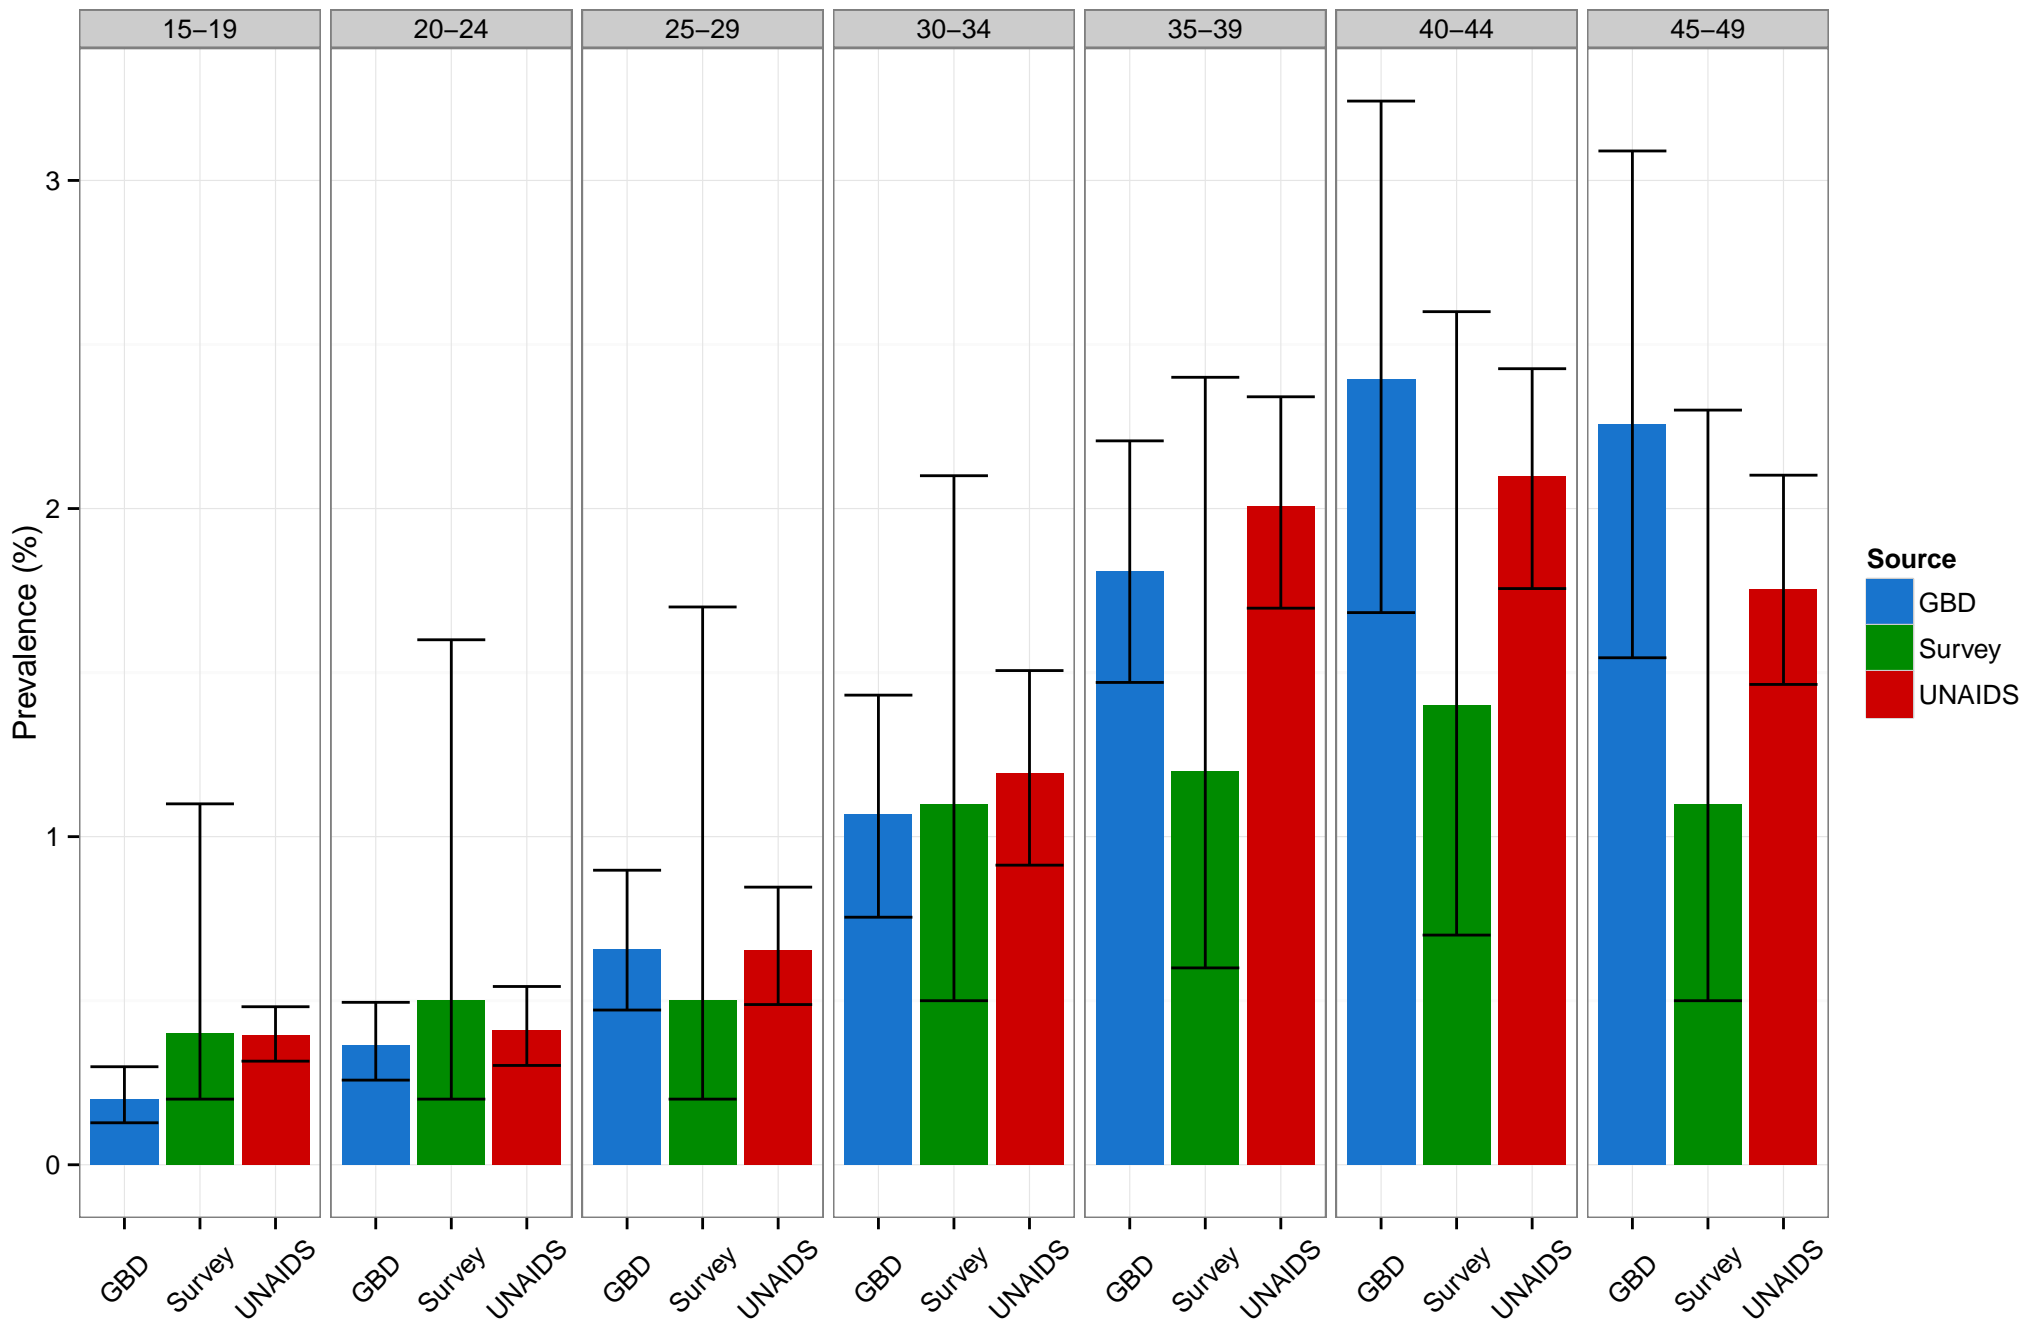

# HIV prevalence comparison to survey estimates by age-group with 95% confidence intervals

BFA 2010 Females

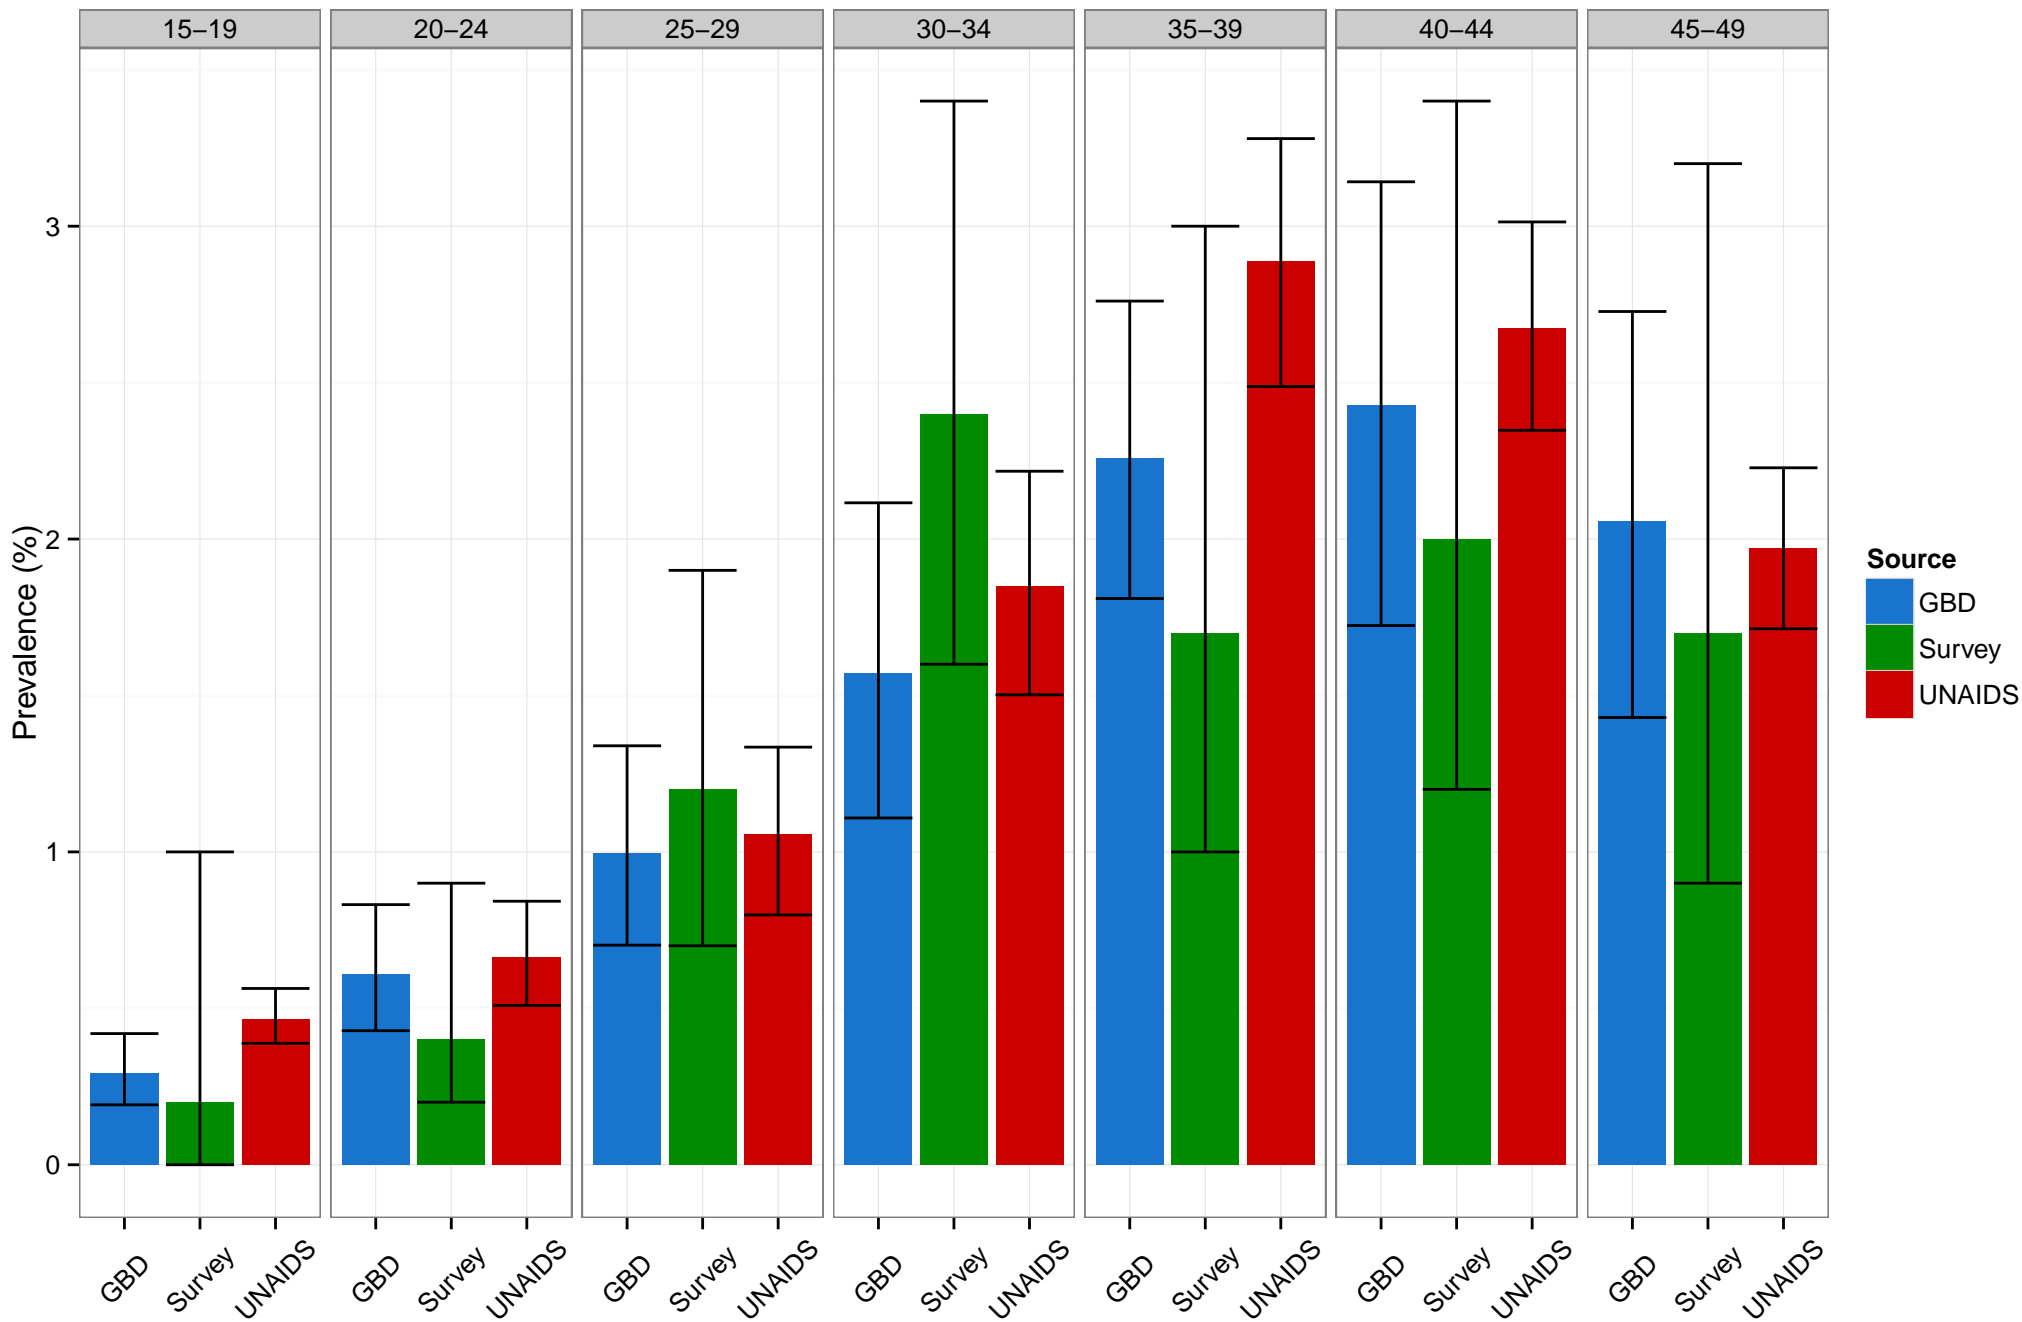

# HIV prevalence comparison to survey estimates by age-group with 95% confidence intervals

CIV 2005 Males

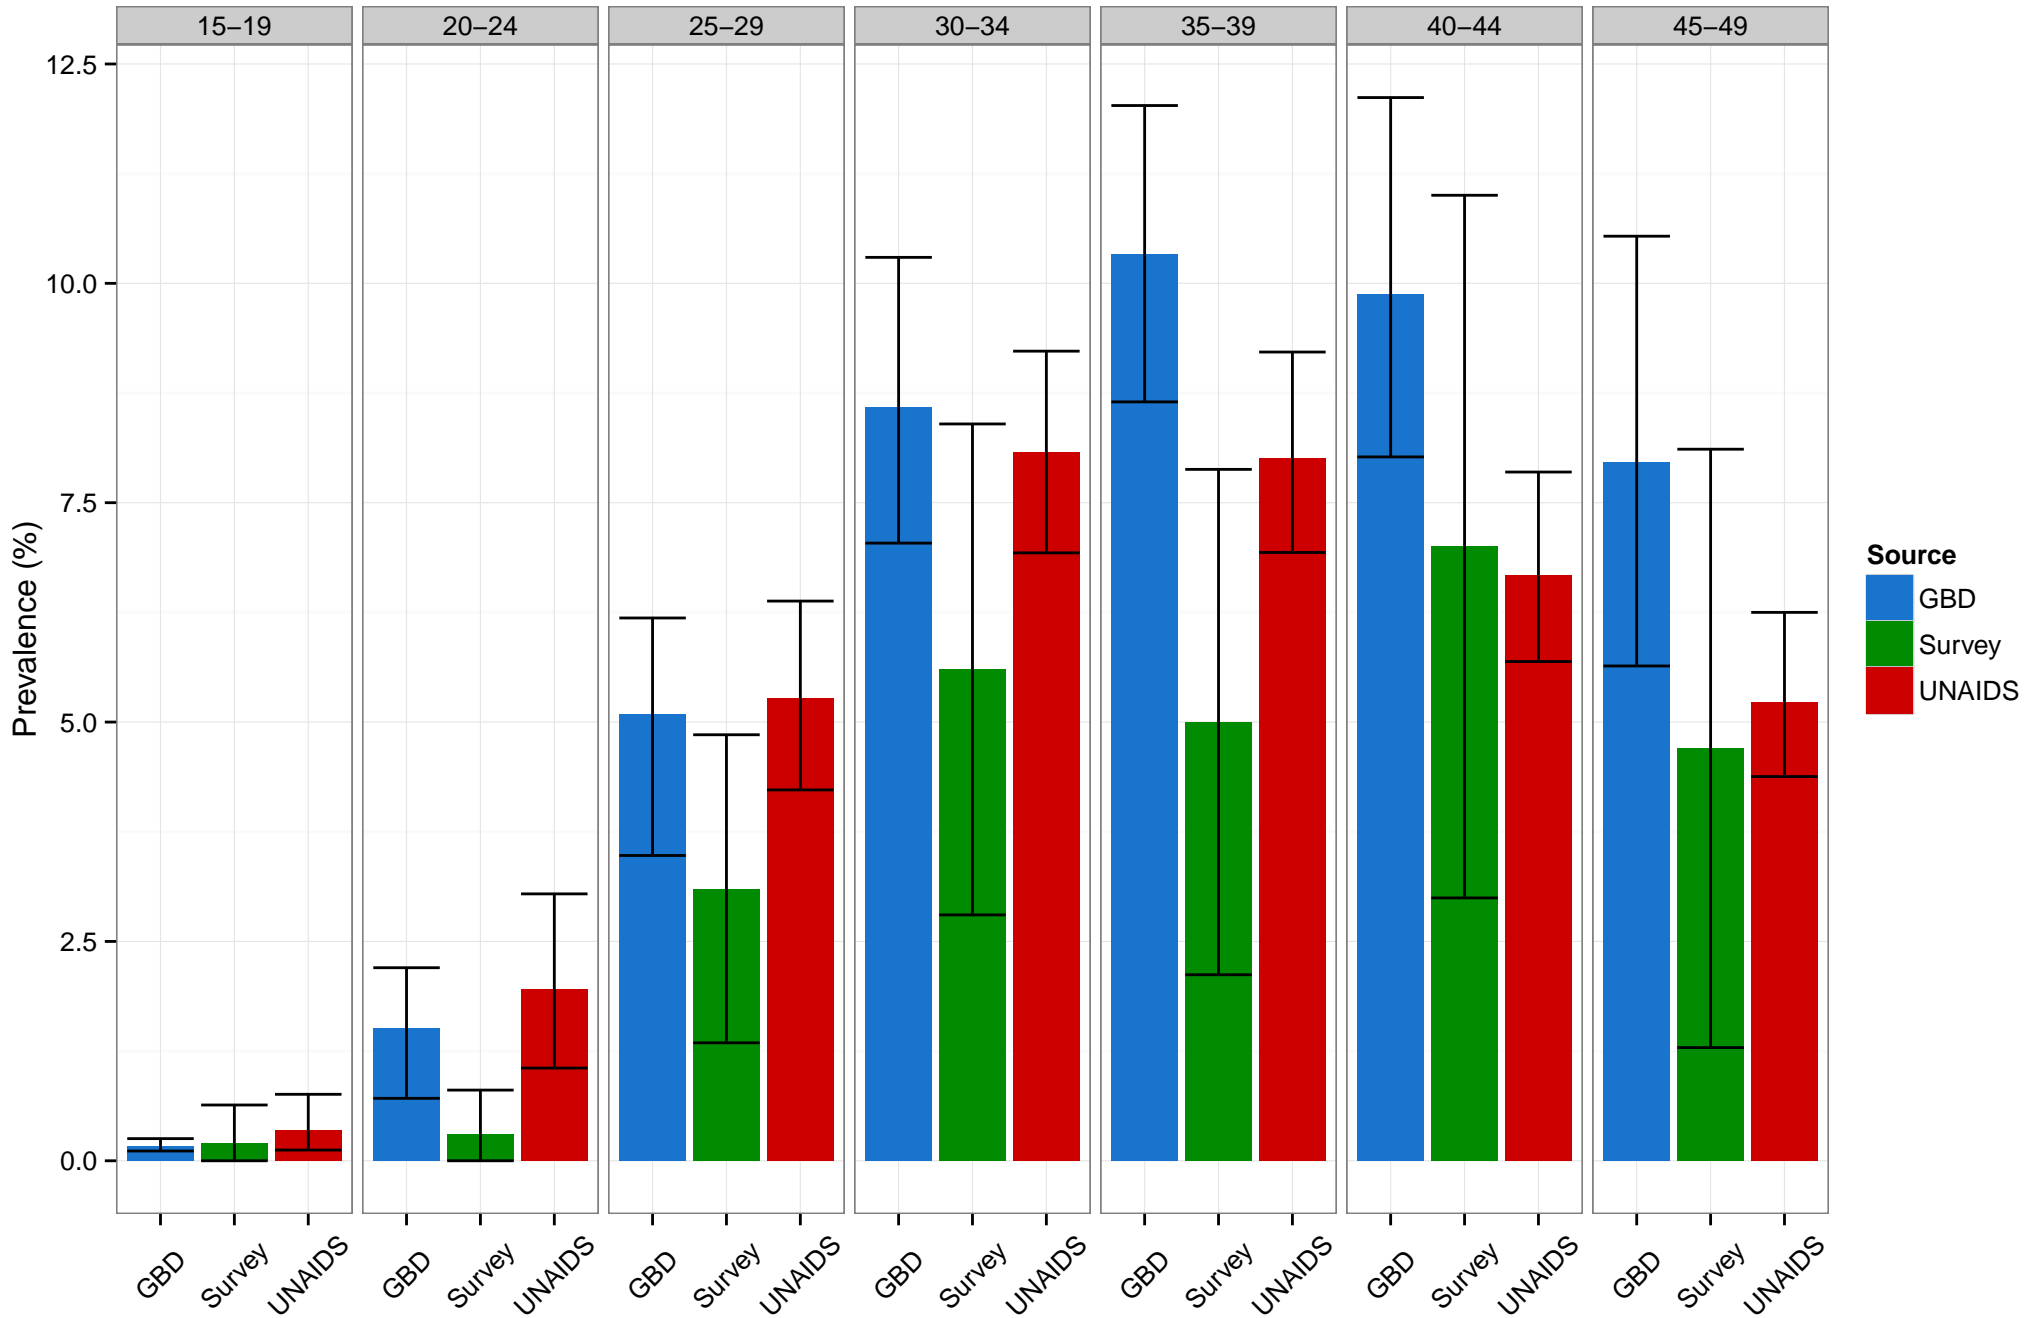

# HIV prevalence comparison to survey estimates by age-group with 95% confidence intervals

CIV 2005 Females

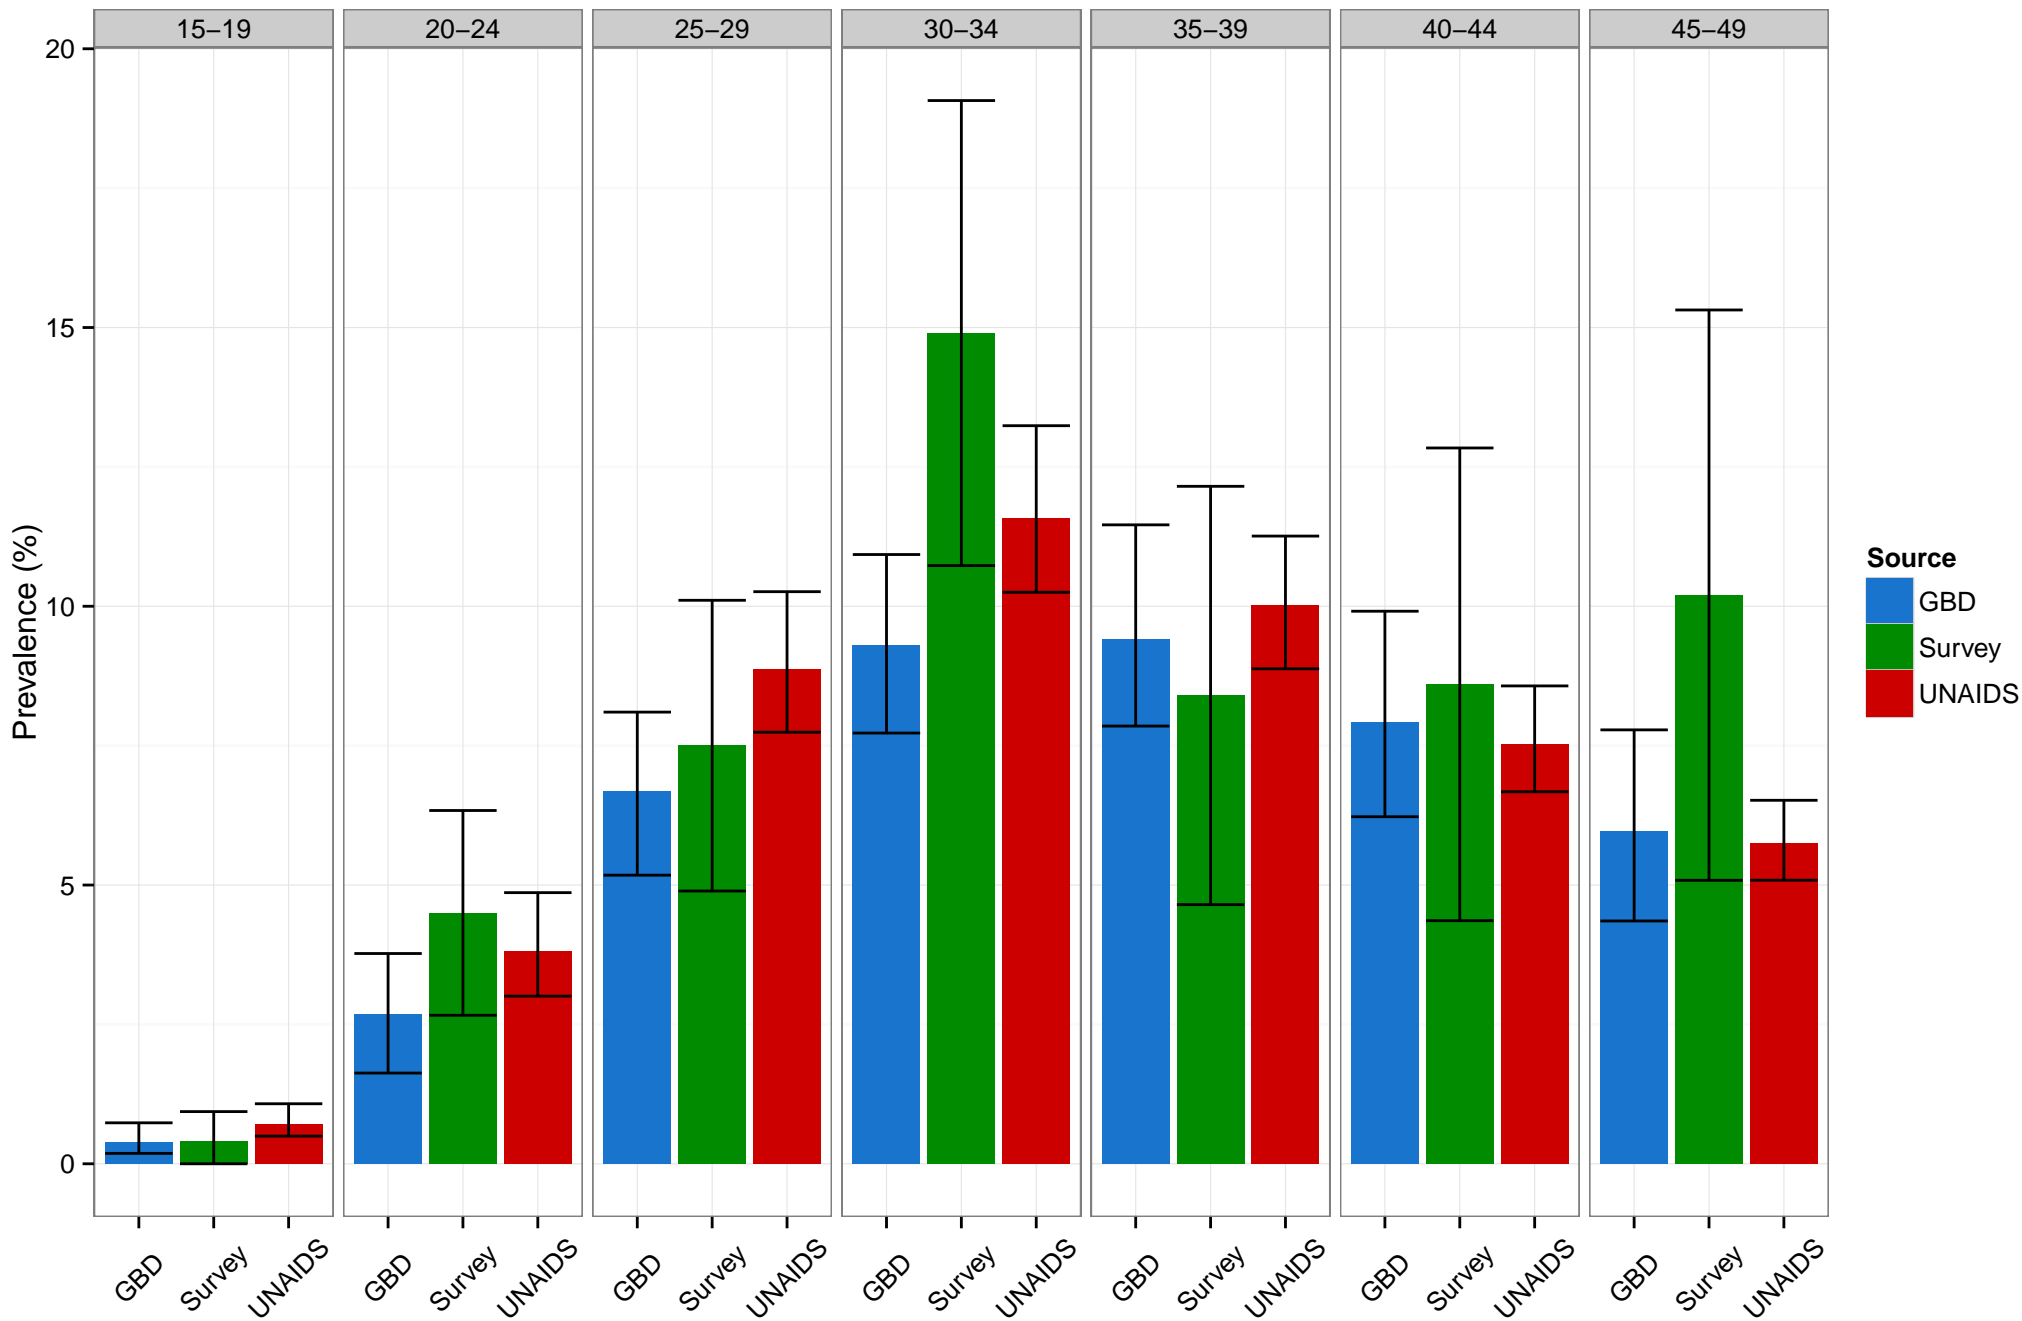

# HIV prevalence comparison to survey estimates by age-group with 95% confidence intervals

CIV 2011–2012 Males

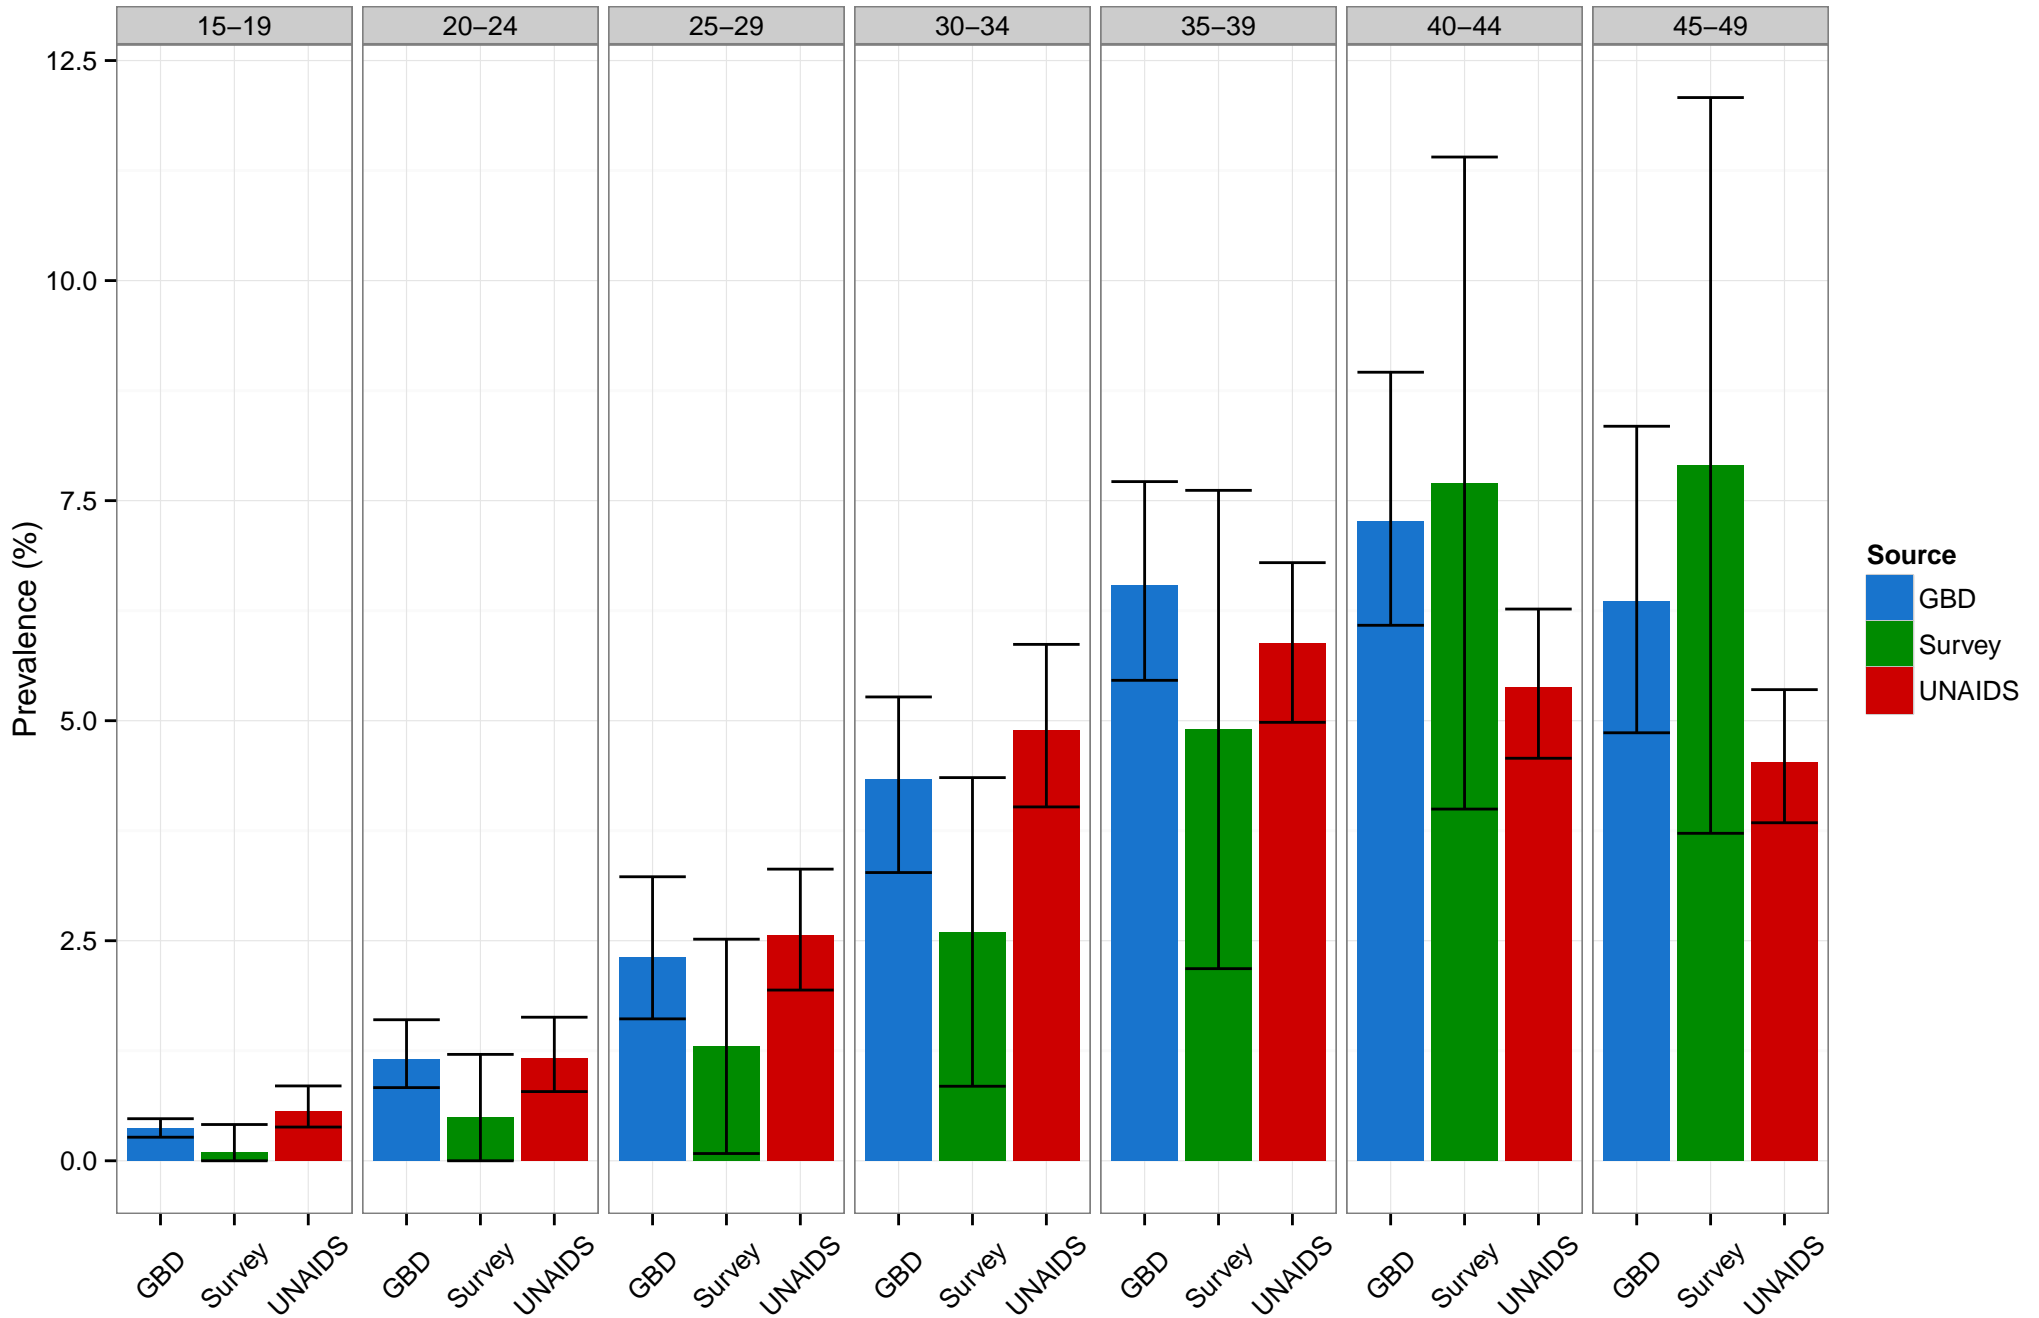

# HIV prevalence comparison to survey estimates by age-group with 95% confidence intervals

CIV 2011–2012 Females

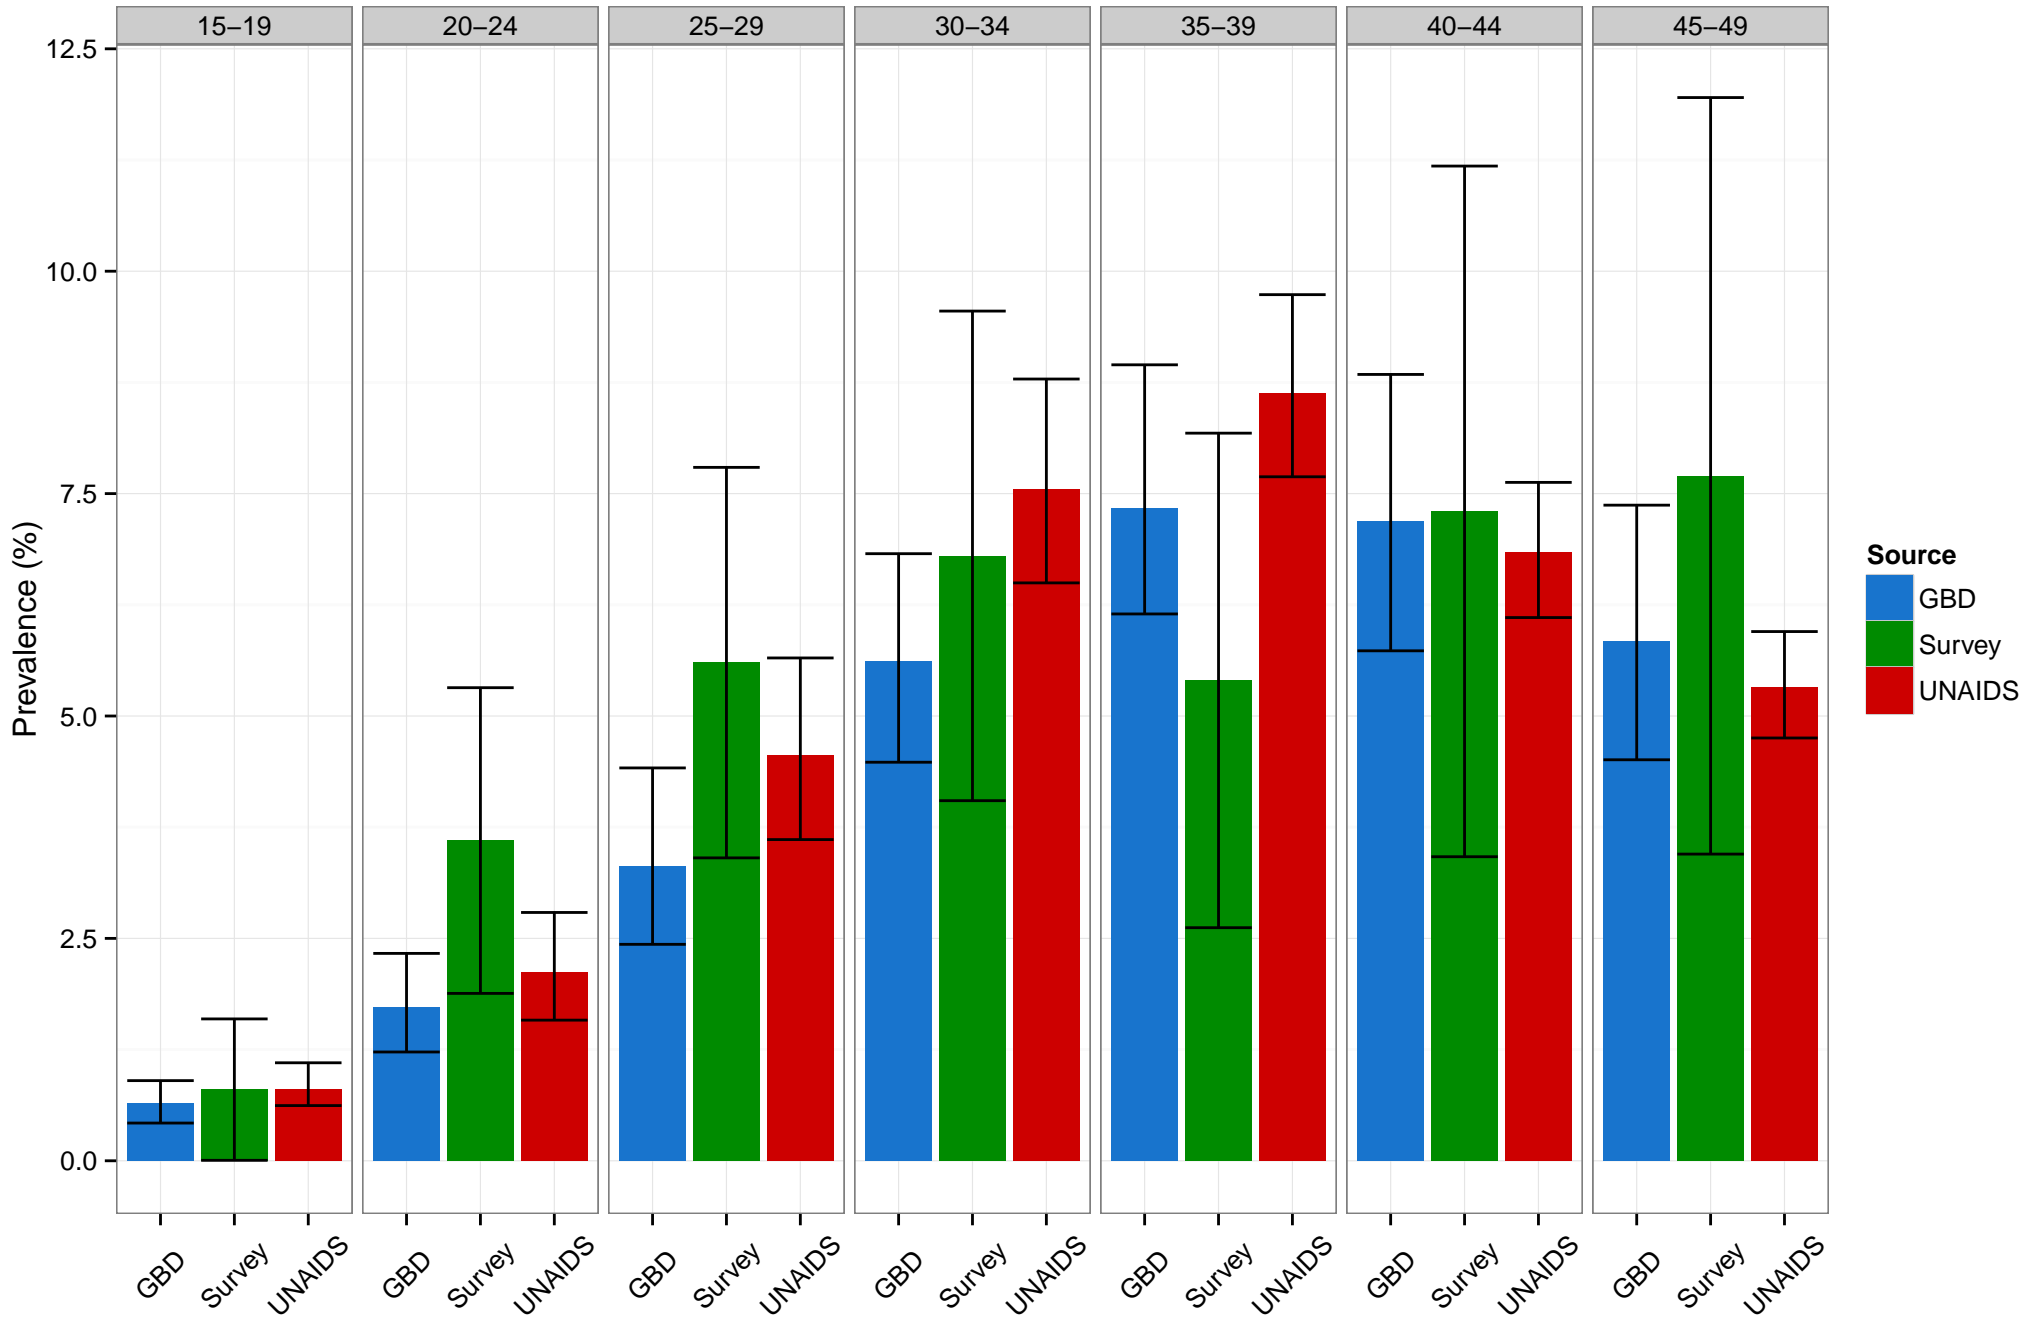

# HIV prevalence comparison to survey estimates by age-group with 95% confidence intervals

CMR 2004 Males

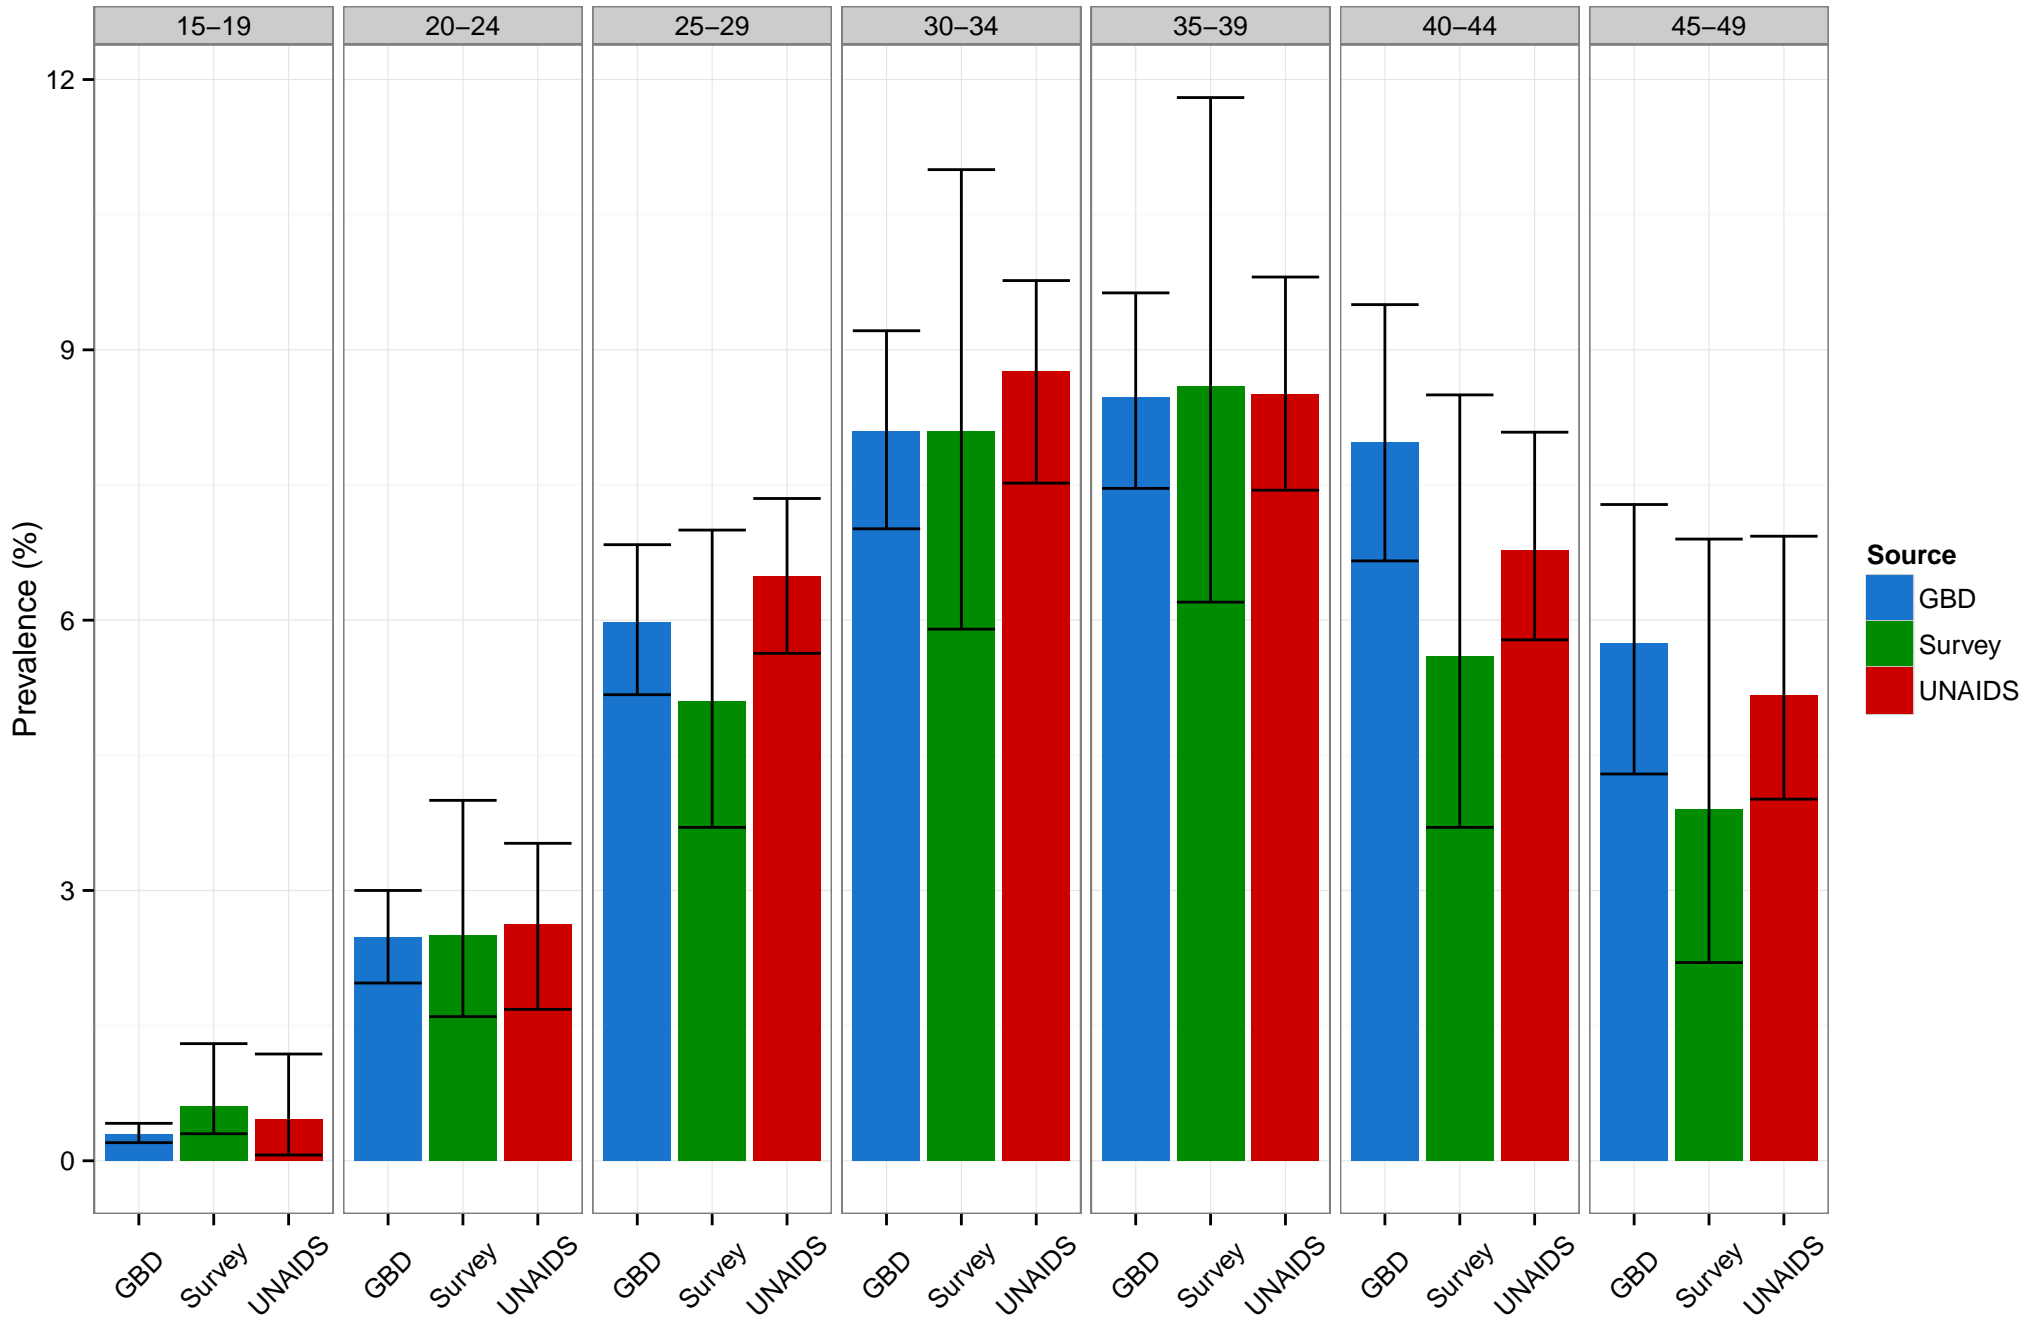

# HIV prevalence comparison to survey estimates by age-group with 95% confidence intervals

CMR 2004 Females

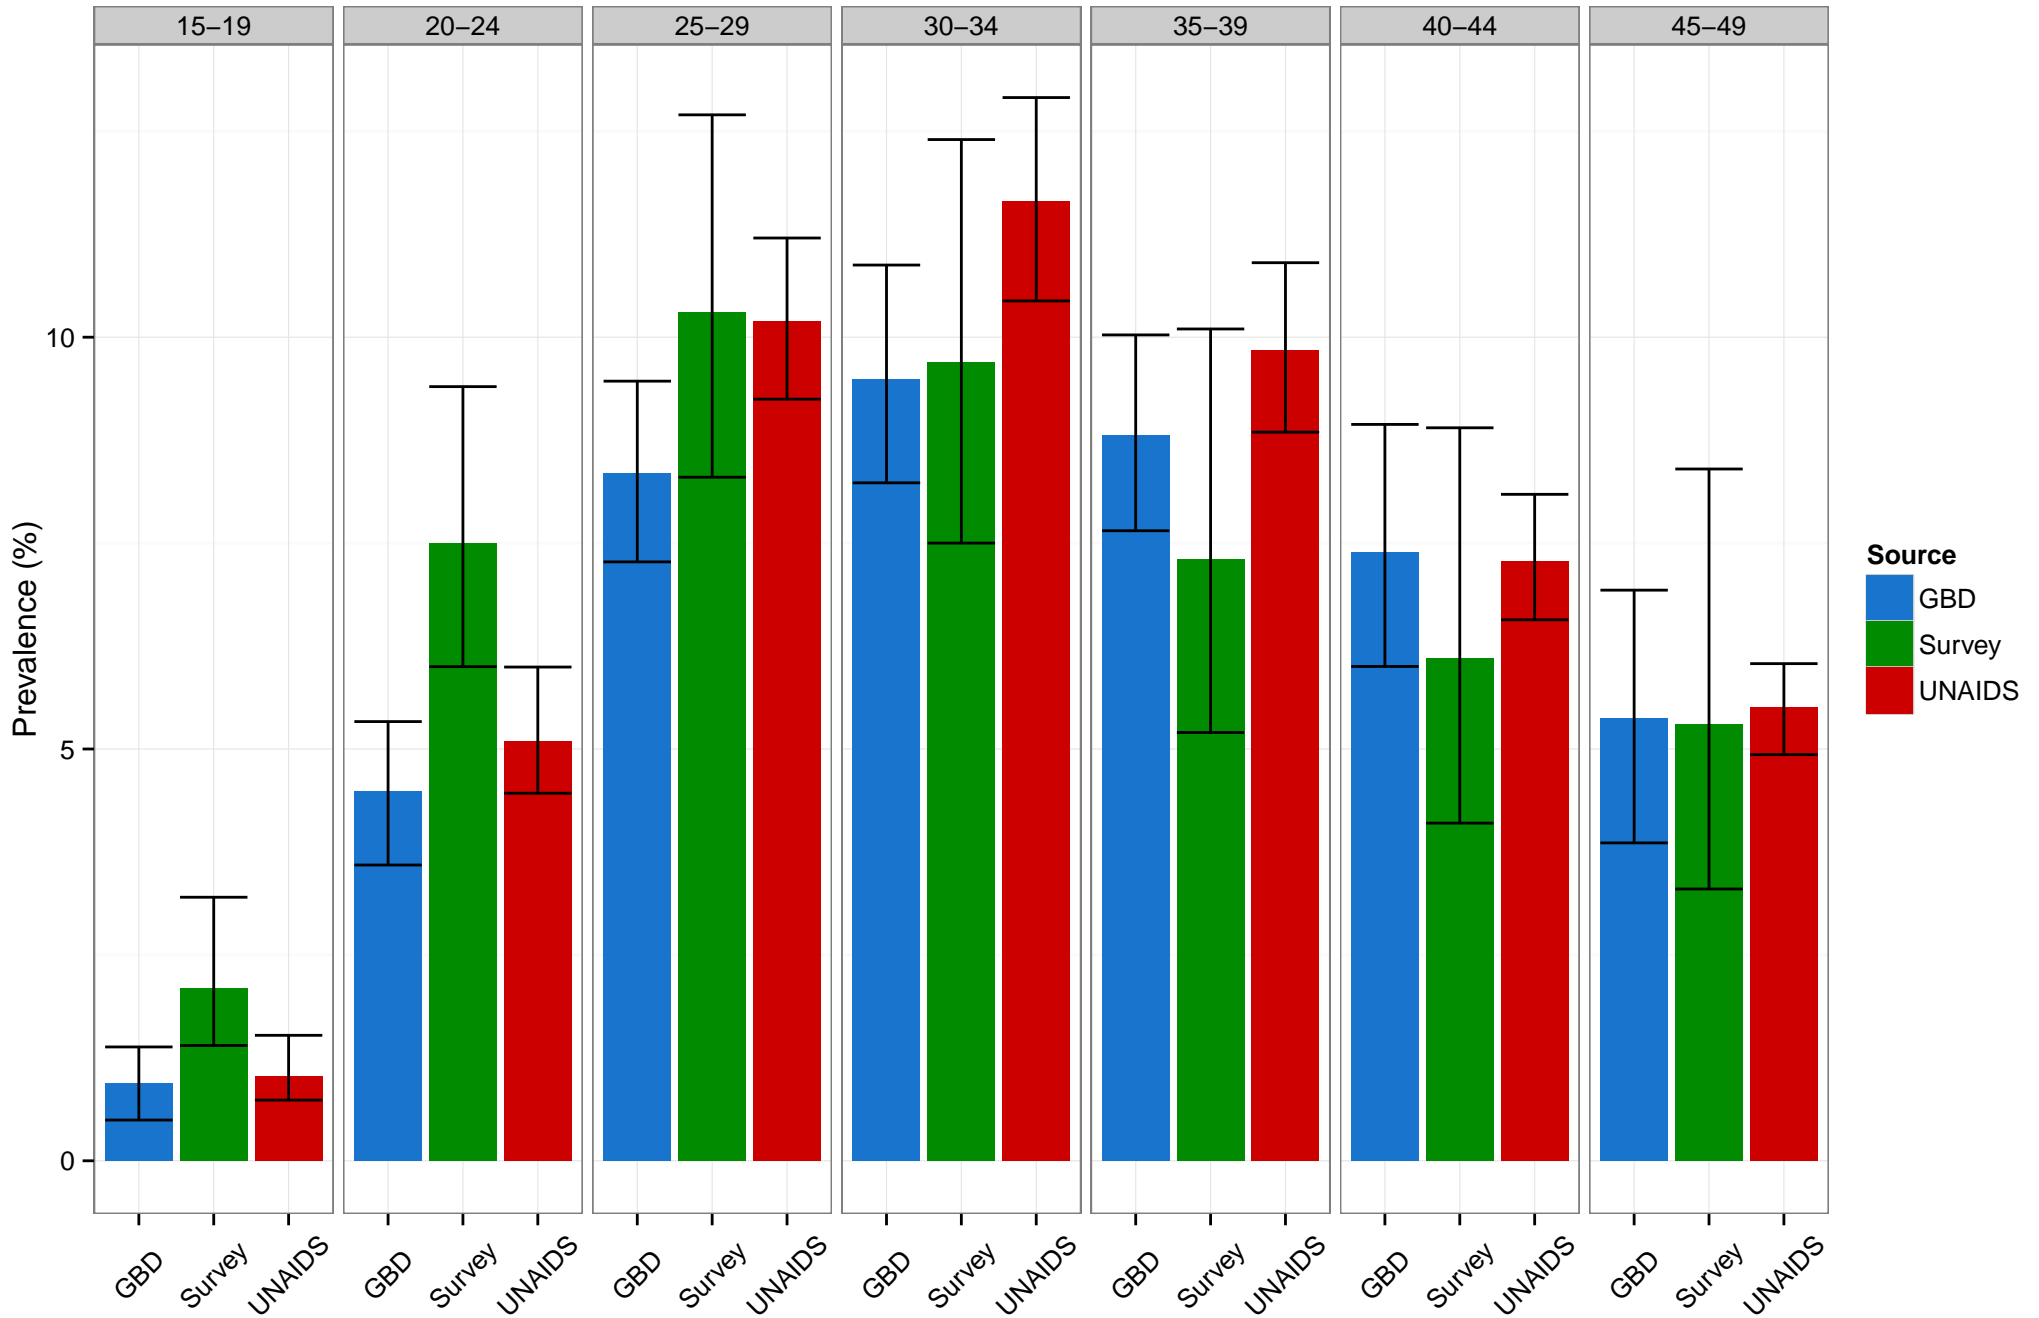



# HIV prevalence comparison to survey estimates by age-group with 95% confidence intervals

CMR 2011 Males

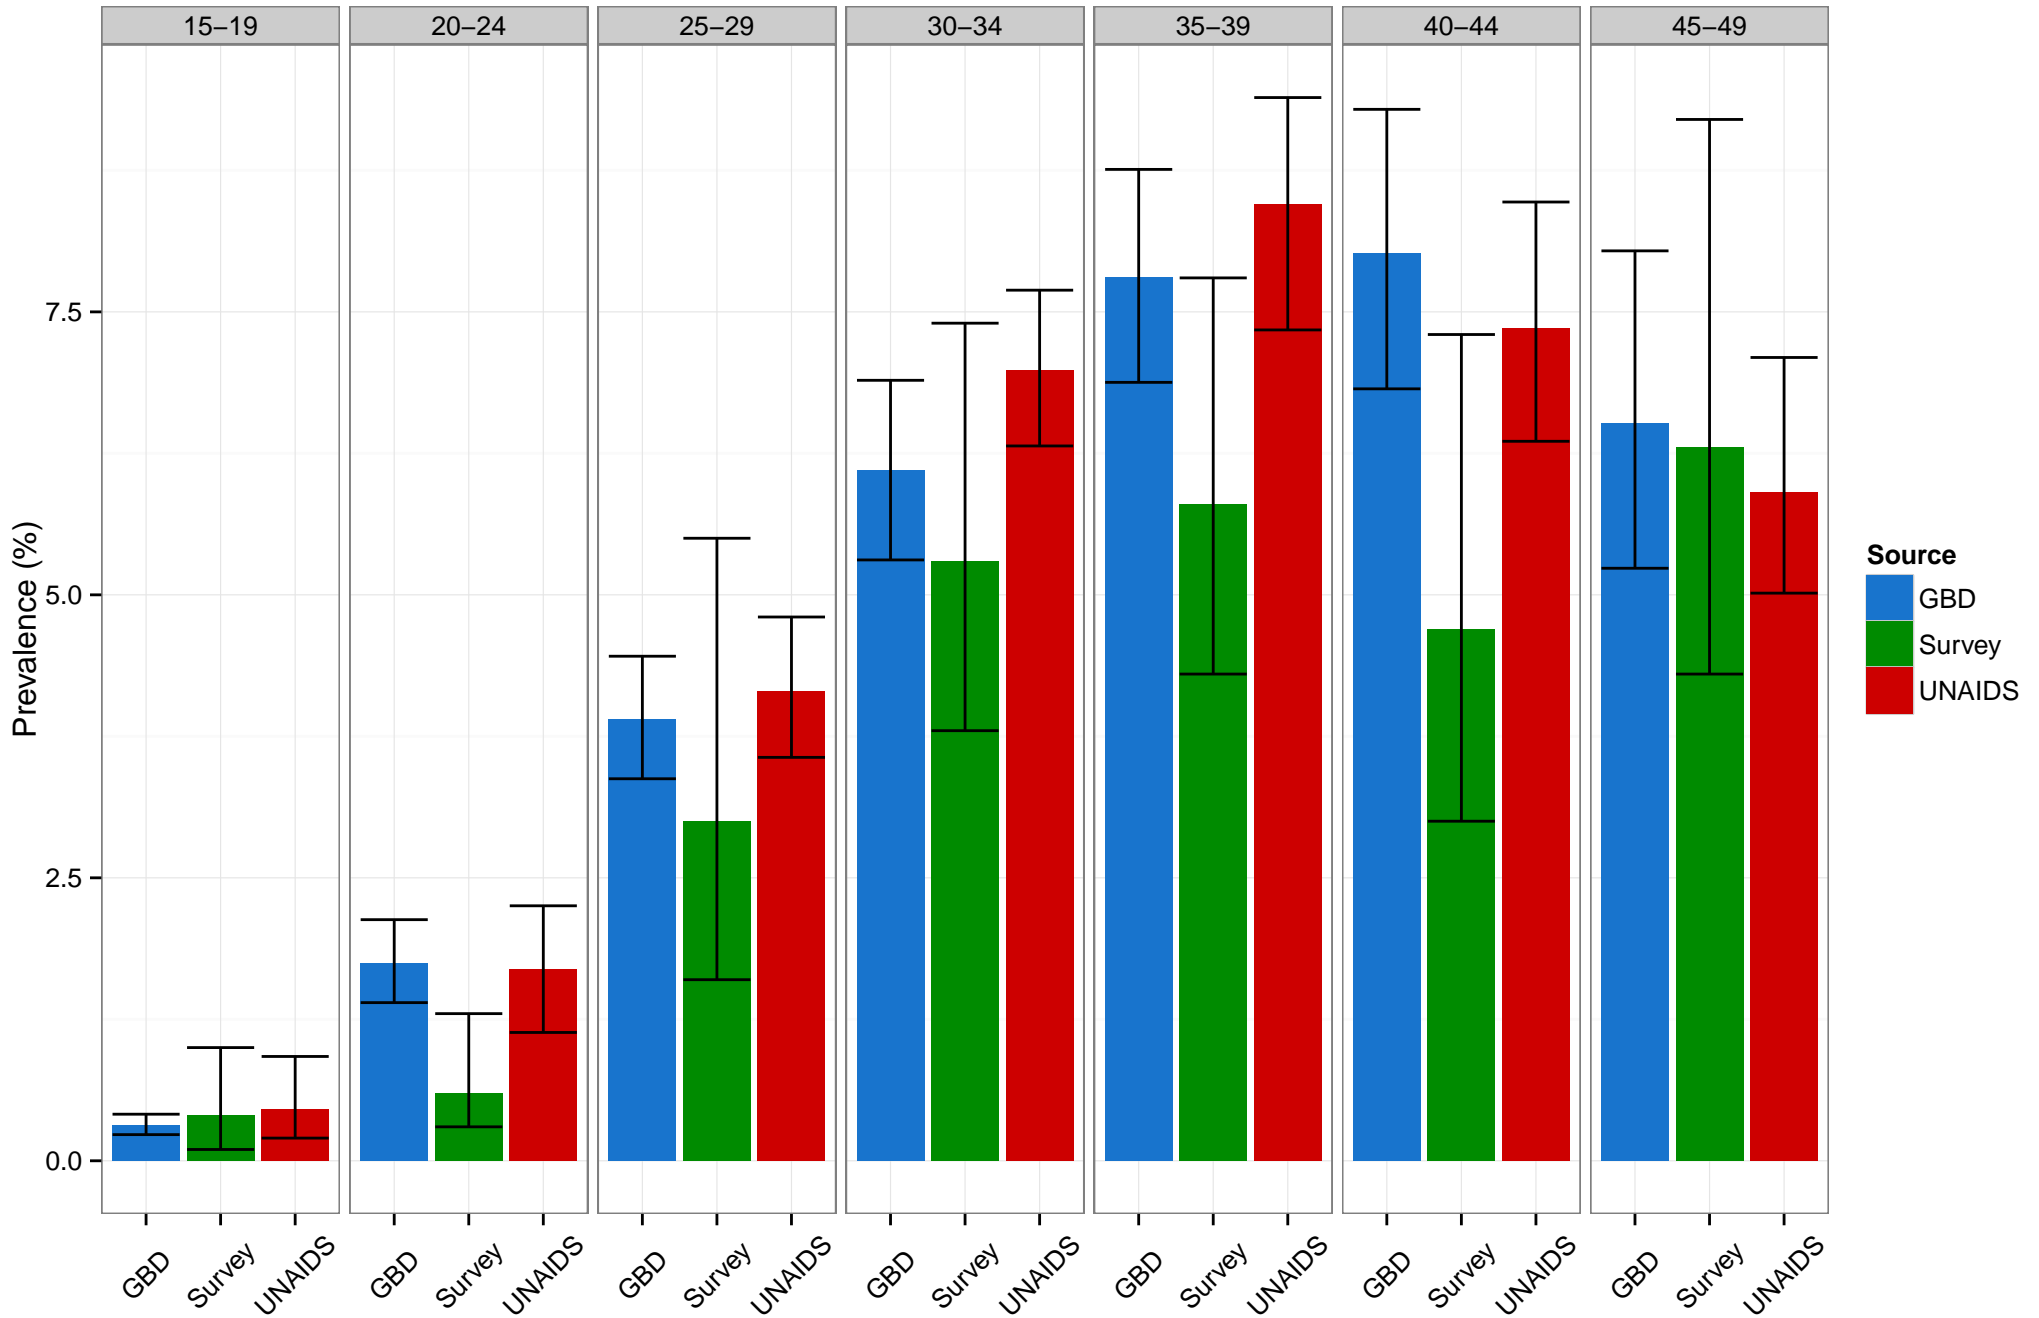

# HIV prevalence comparison to survey estimates by age-group with 95% confidence intervals

CMR 2011 Females

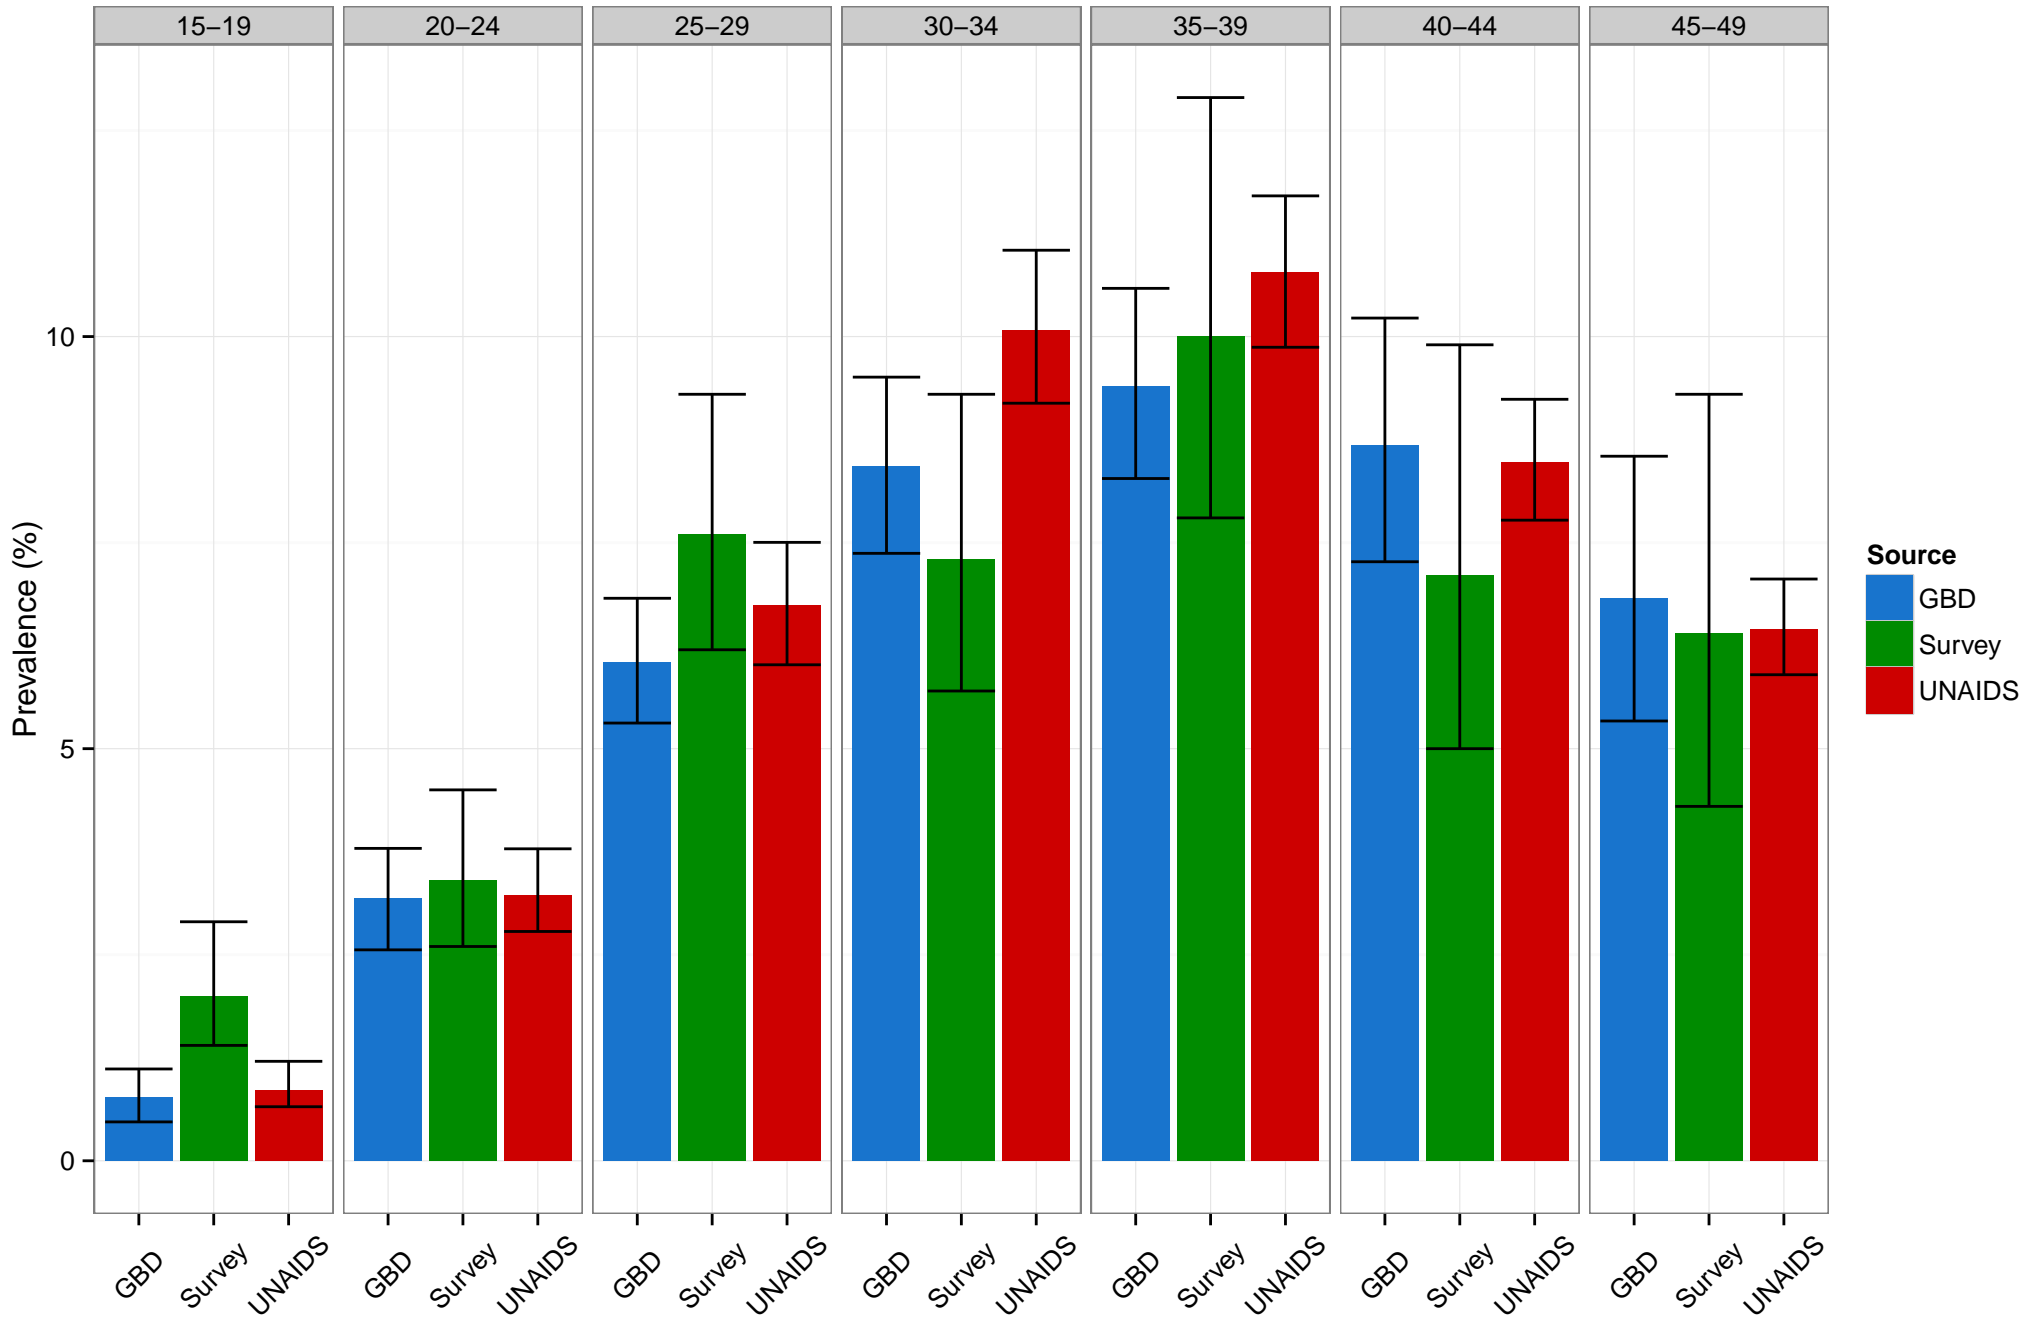

# HIV prevalence comparison to survey estimates by age-group with 95% confidence intervals

COD 2007 Males

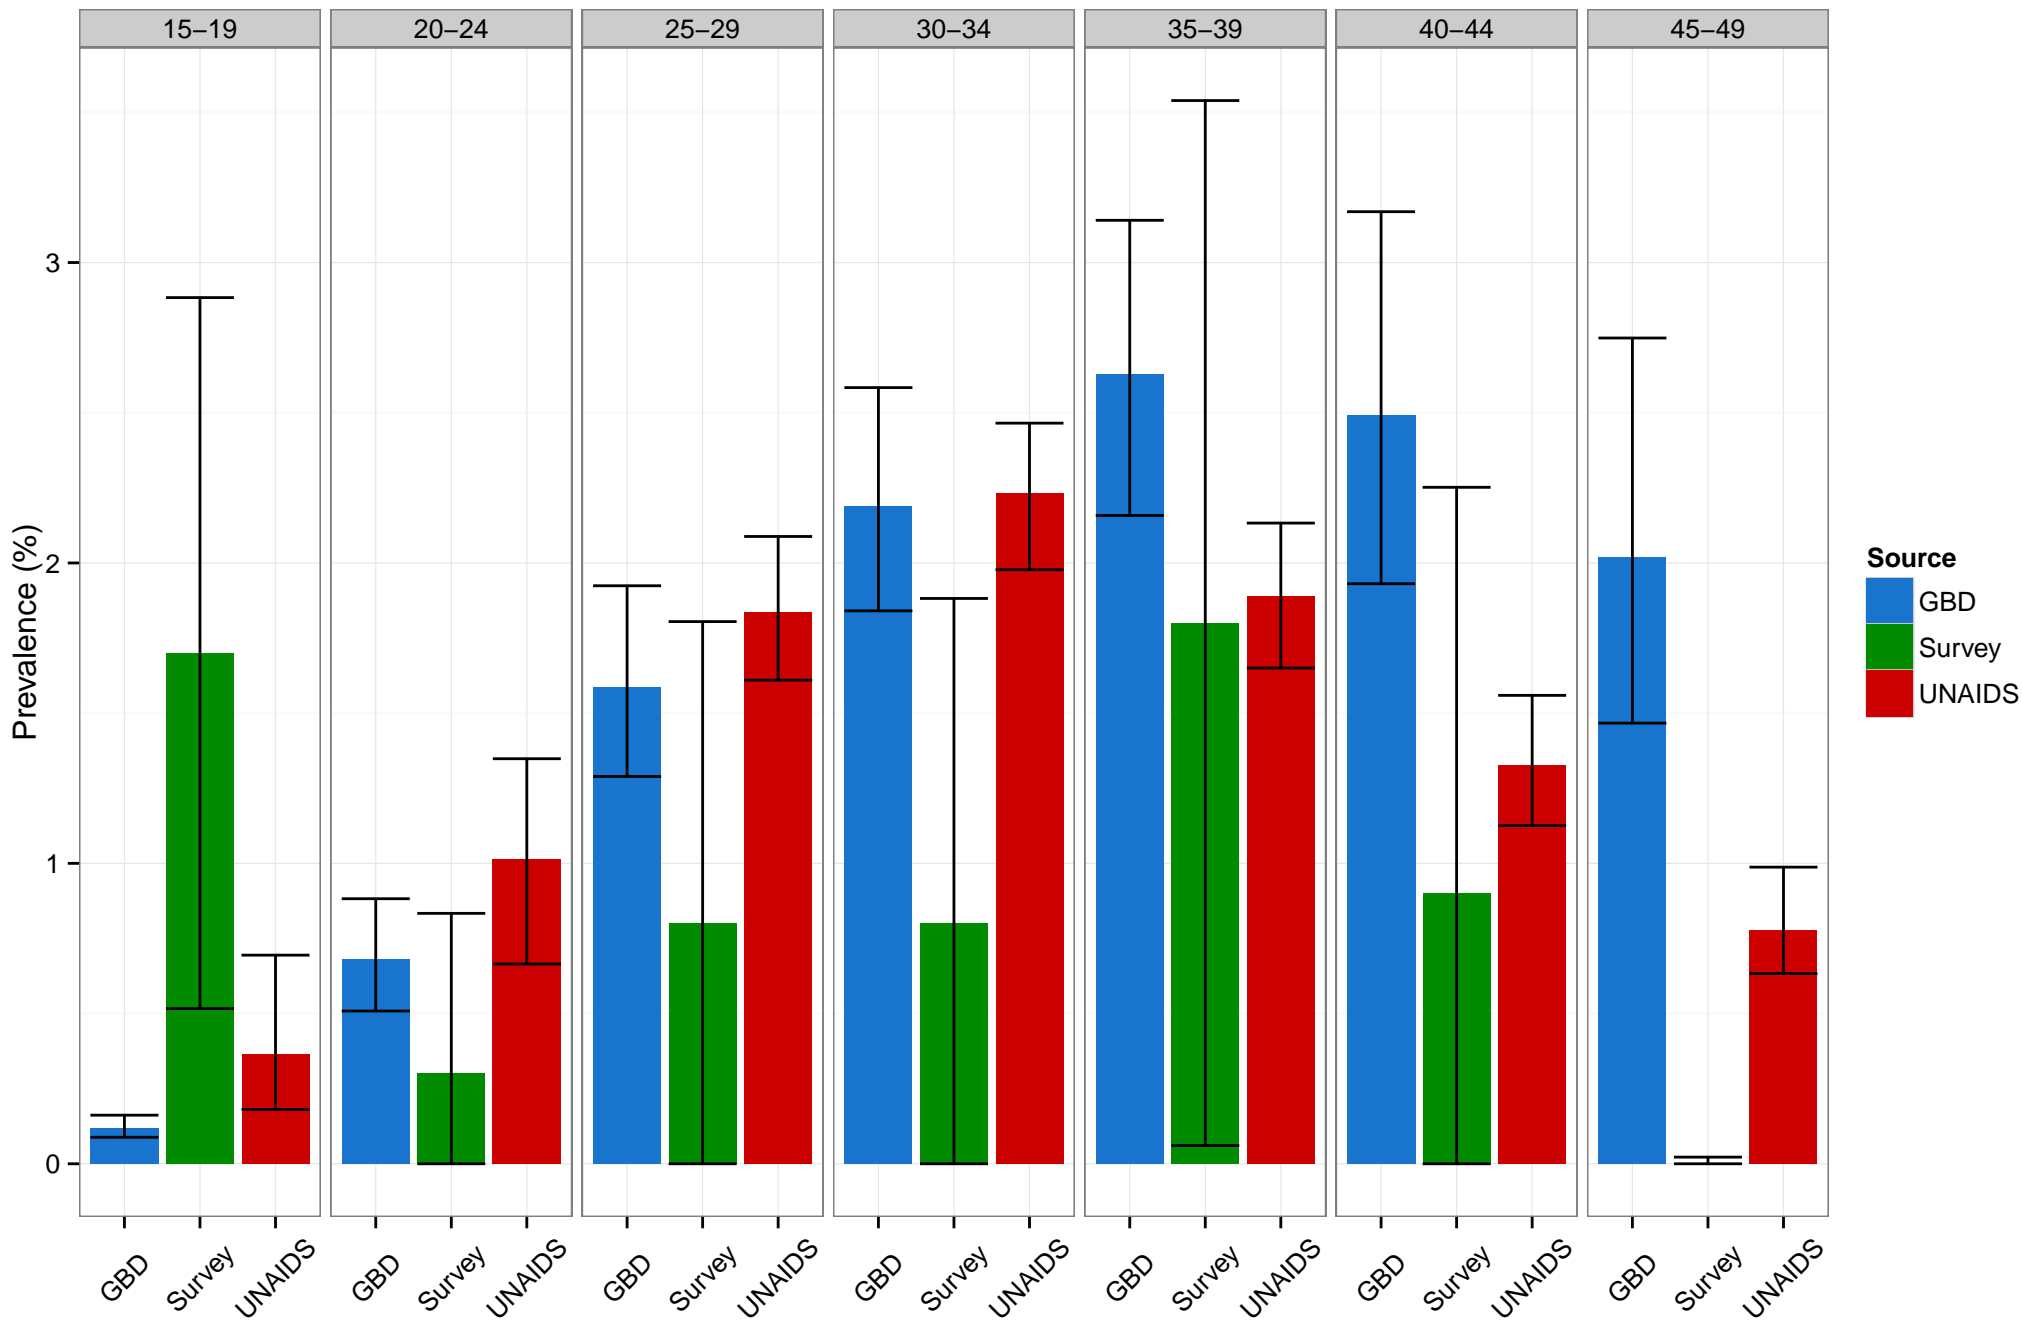

# HIV prevalence comparison to survey estimates by age-group with 95% confidence intervals

COD 2007 Females

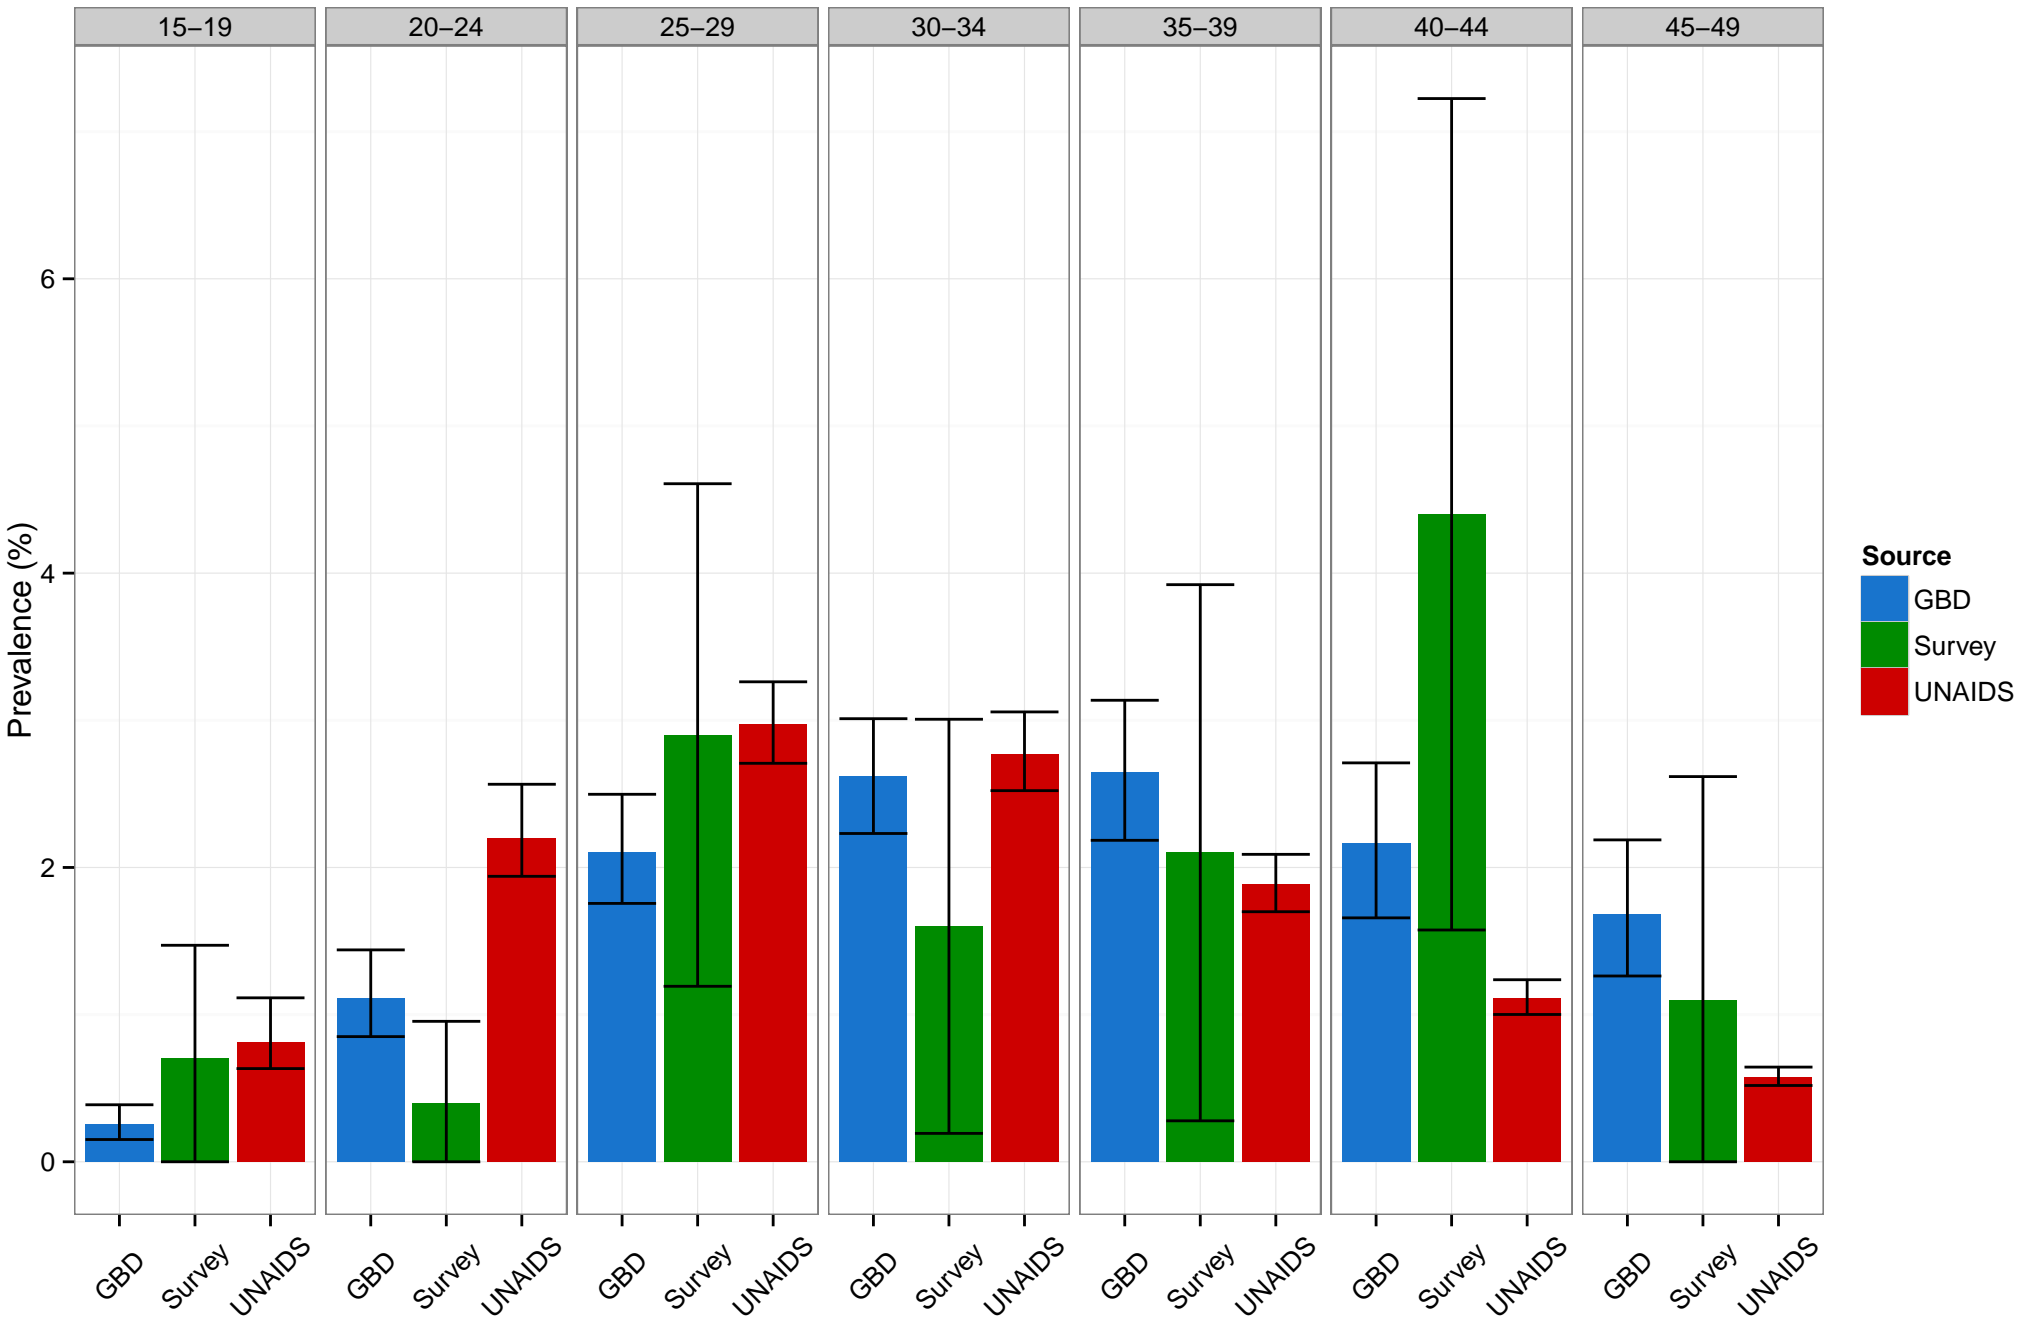

# HIV prevalence comparison to survey estimates by age-group with 95% confidence intervals

COG 2009 Males

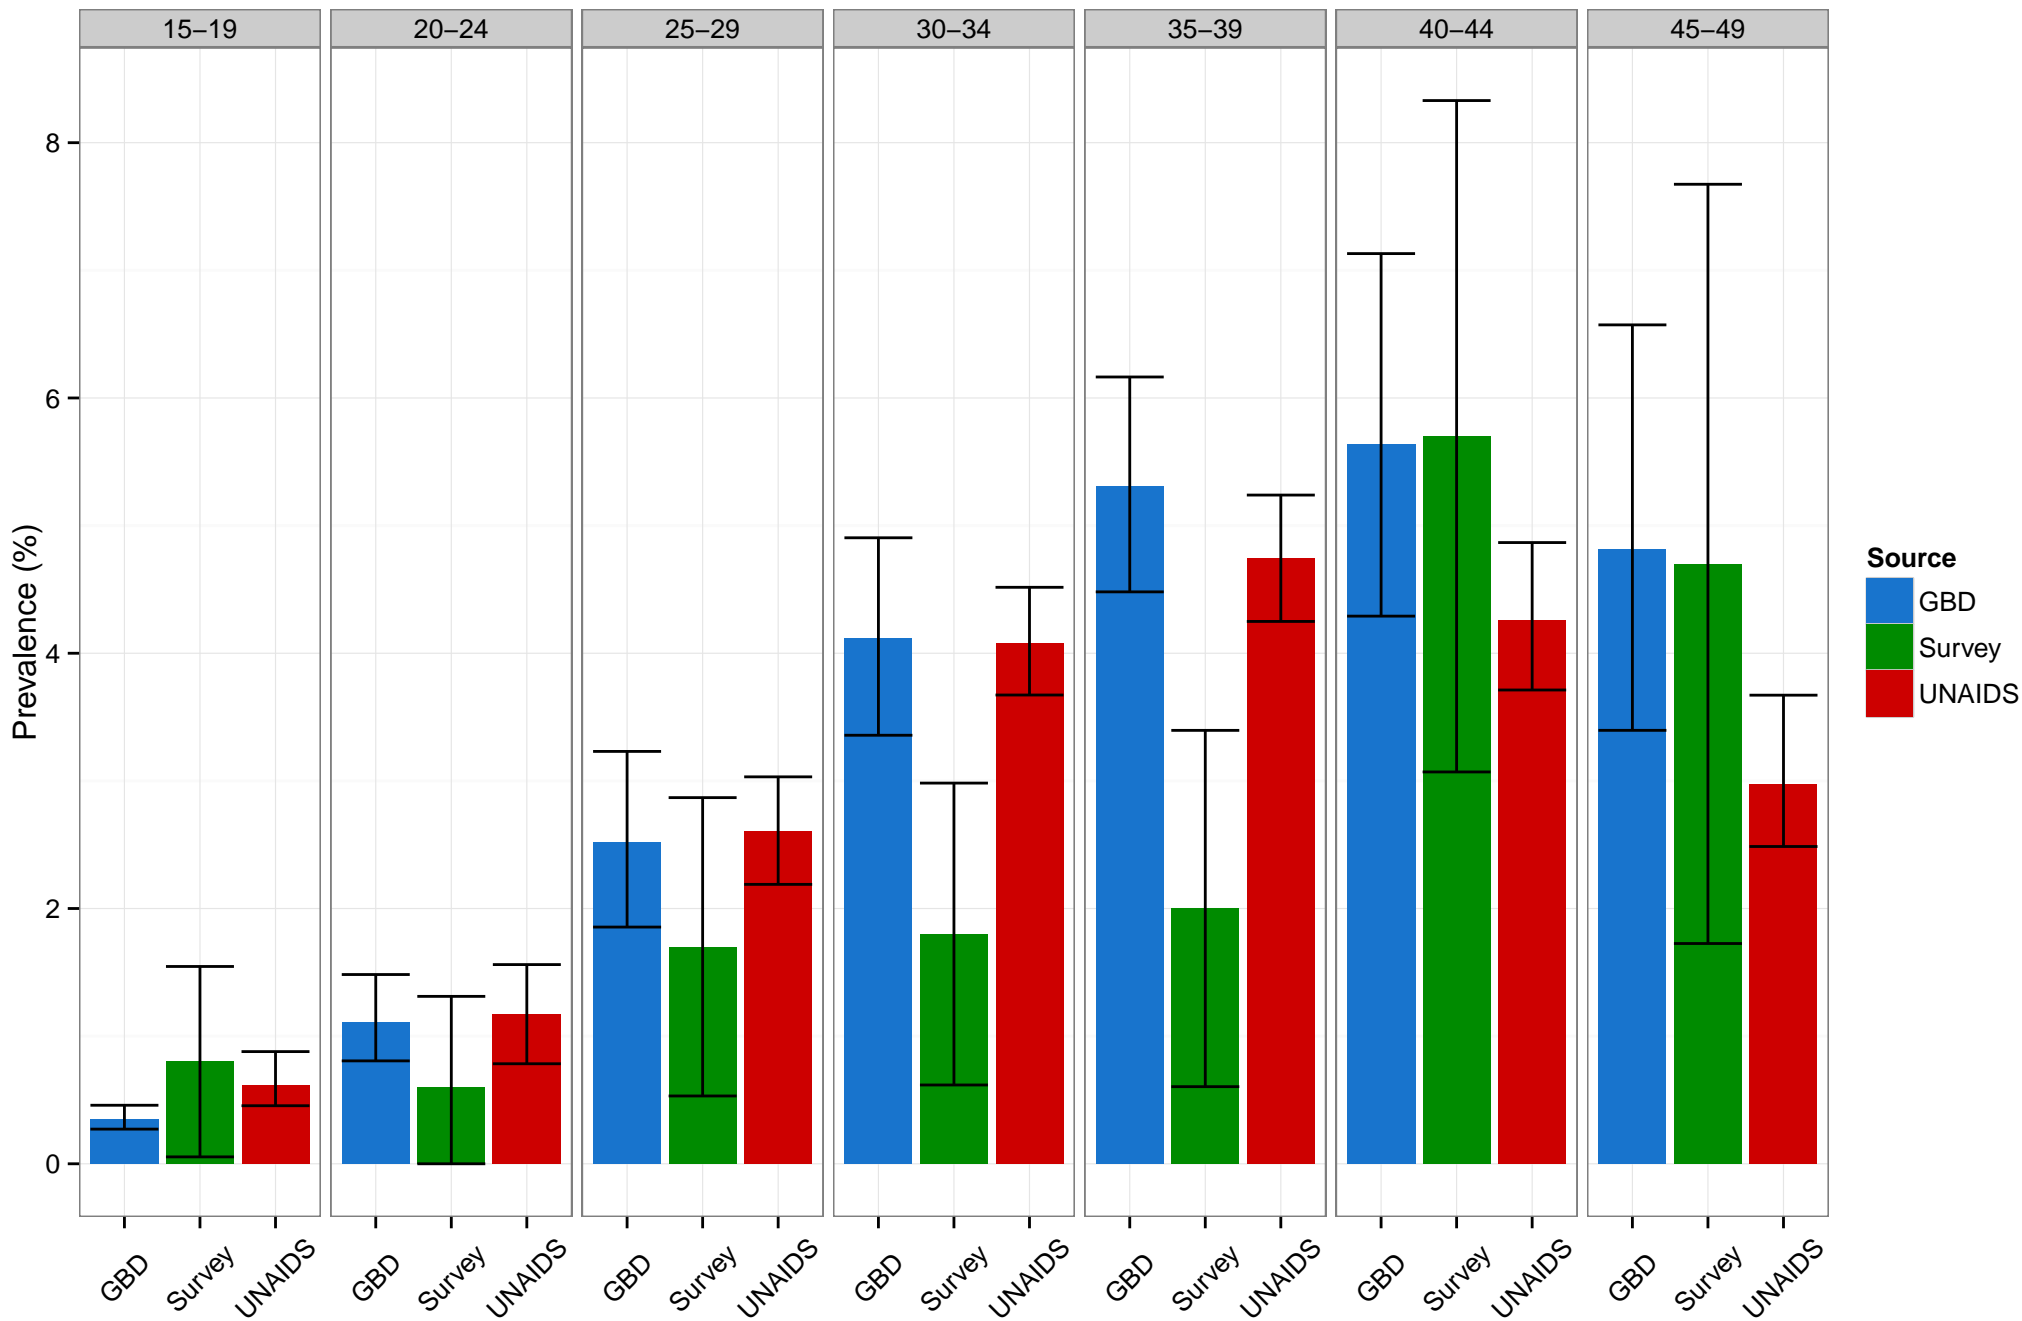

# HIV prevalence comparison to survey estimates by age-group with 95% confidence intervals

COG 2009 Females

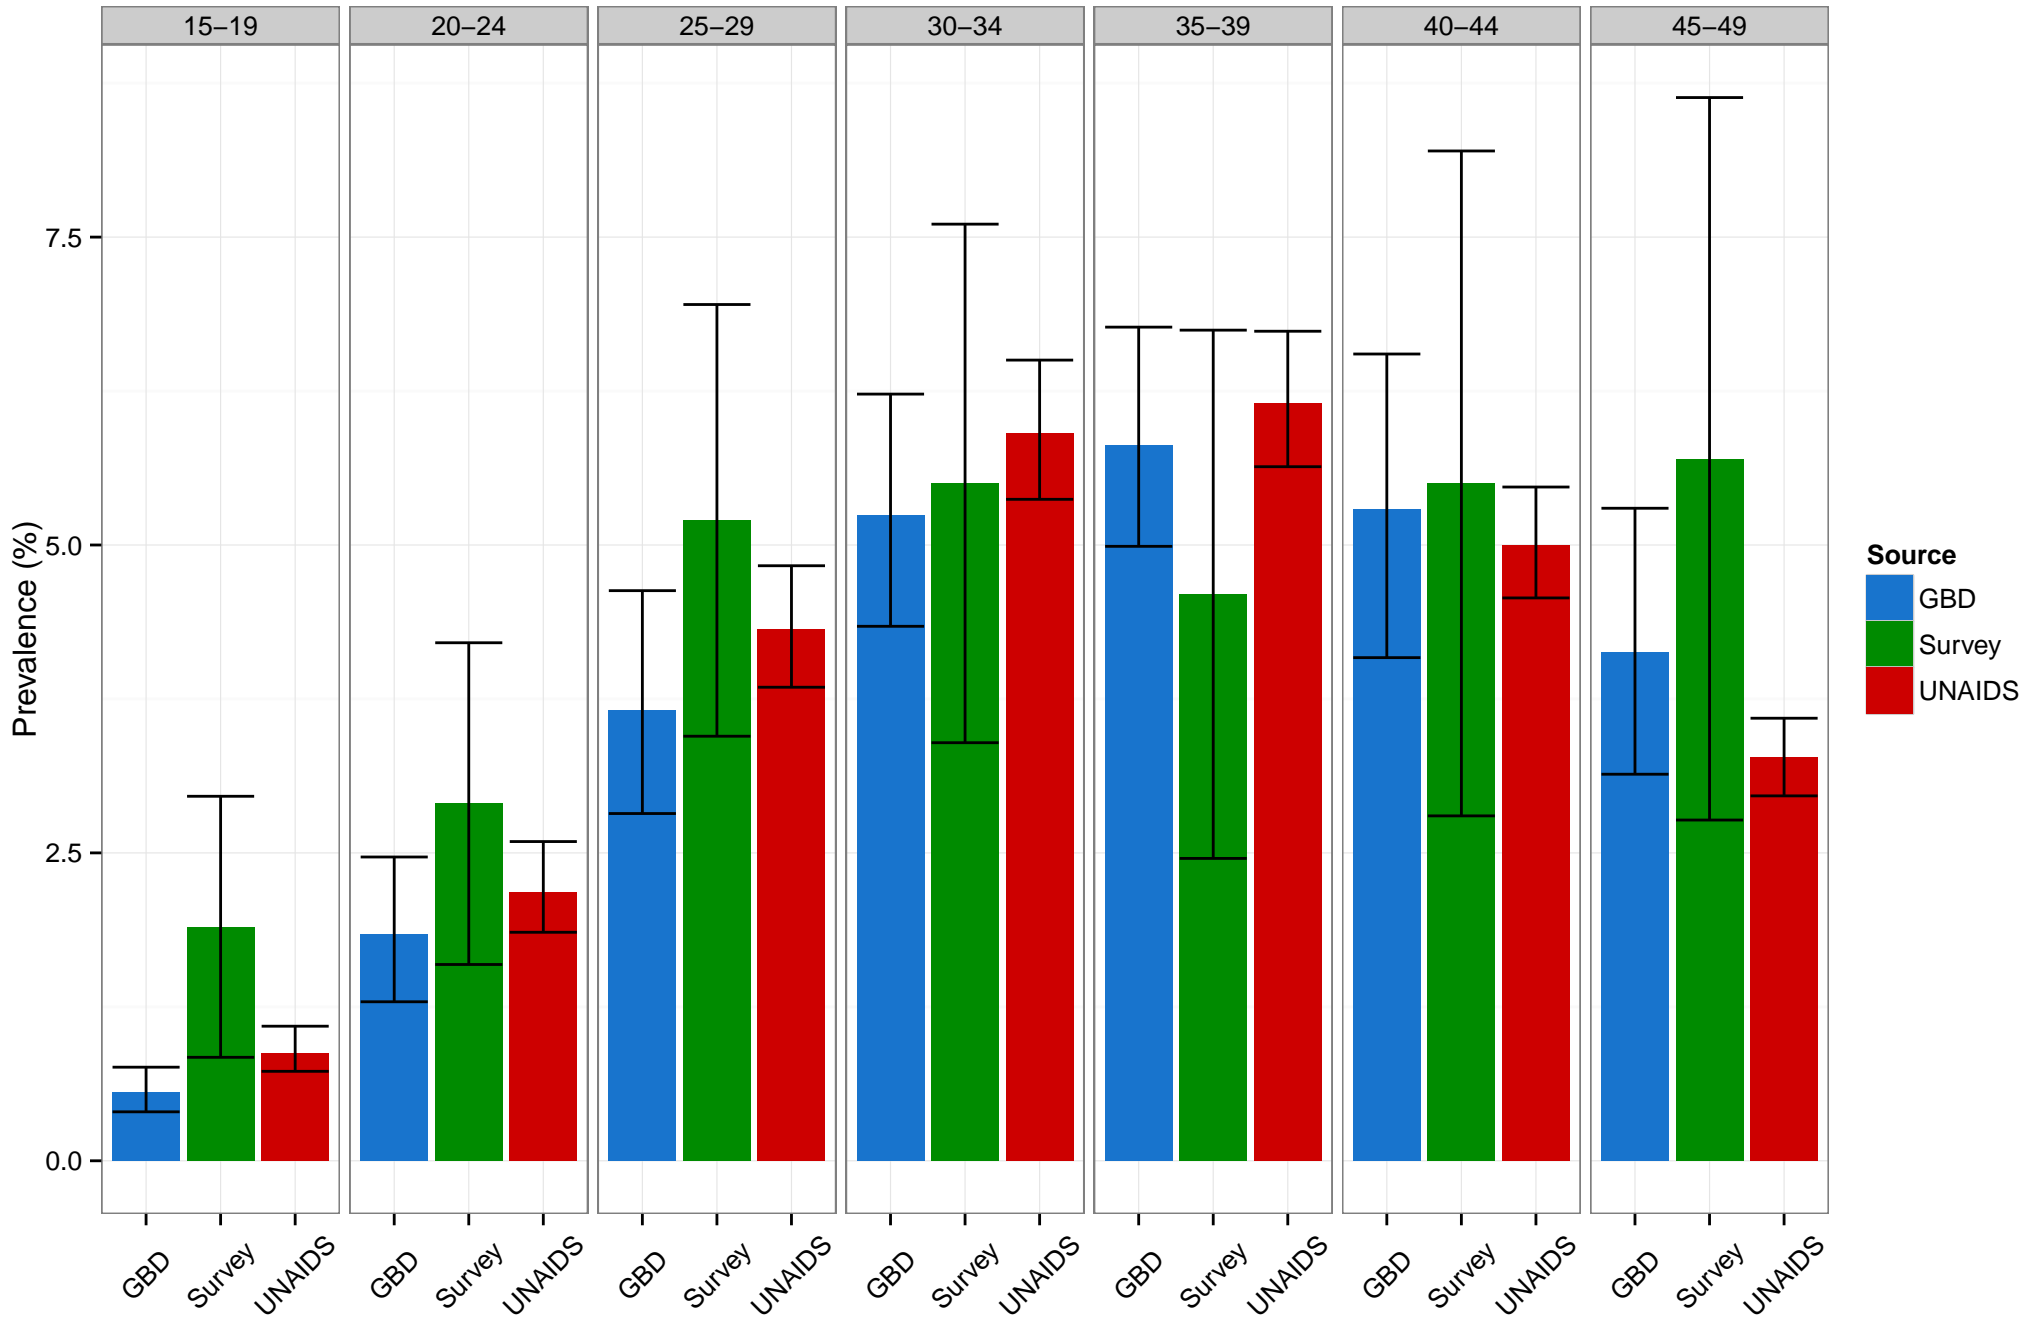

# HIV prevalence comparison to survey estimates by age-group with 95% confidence intervals

CPV 2005 Males

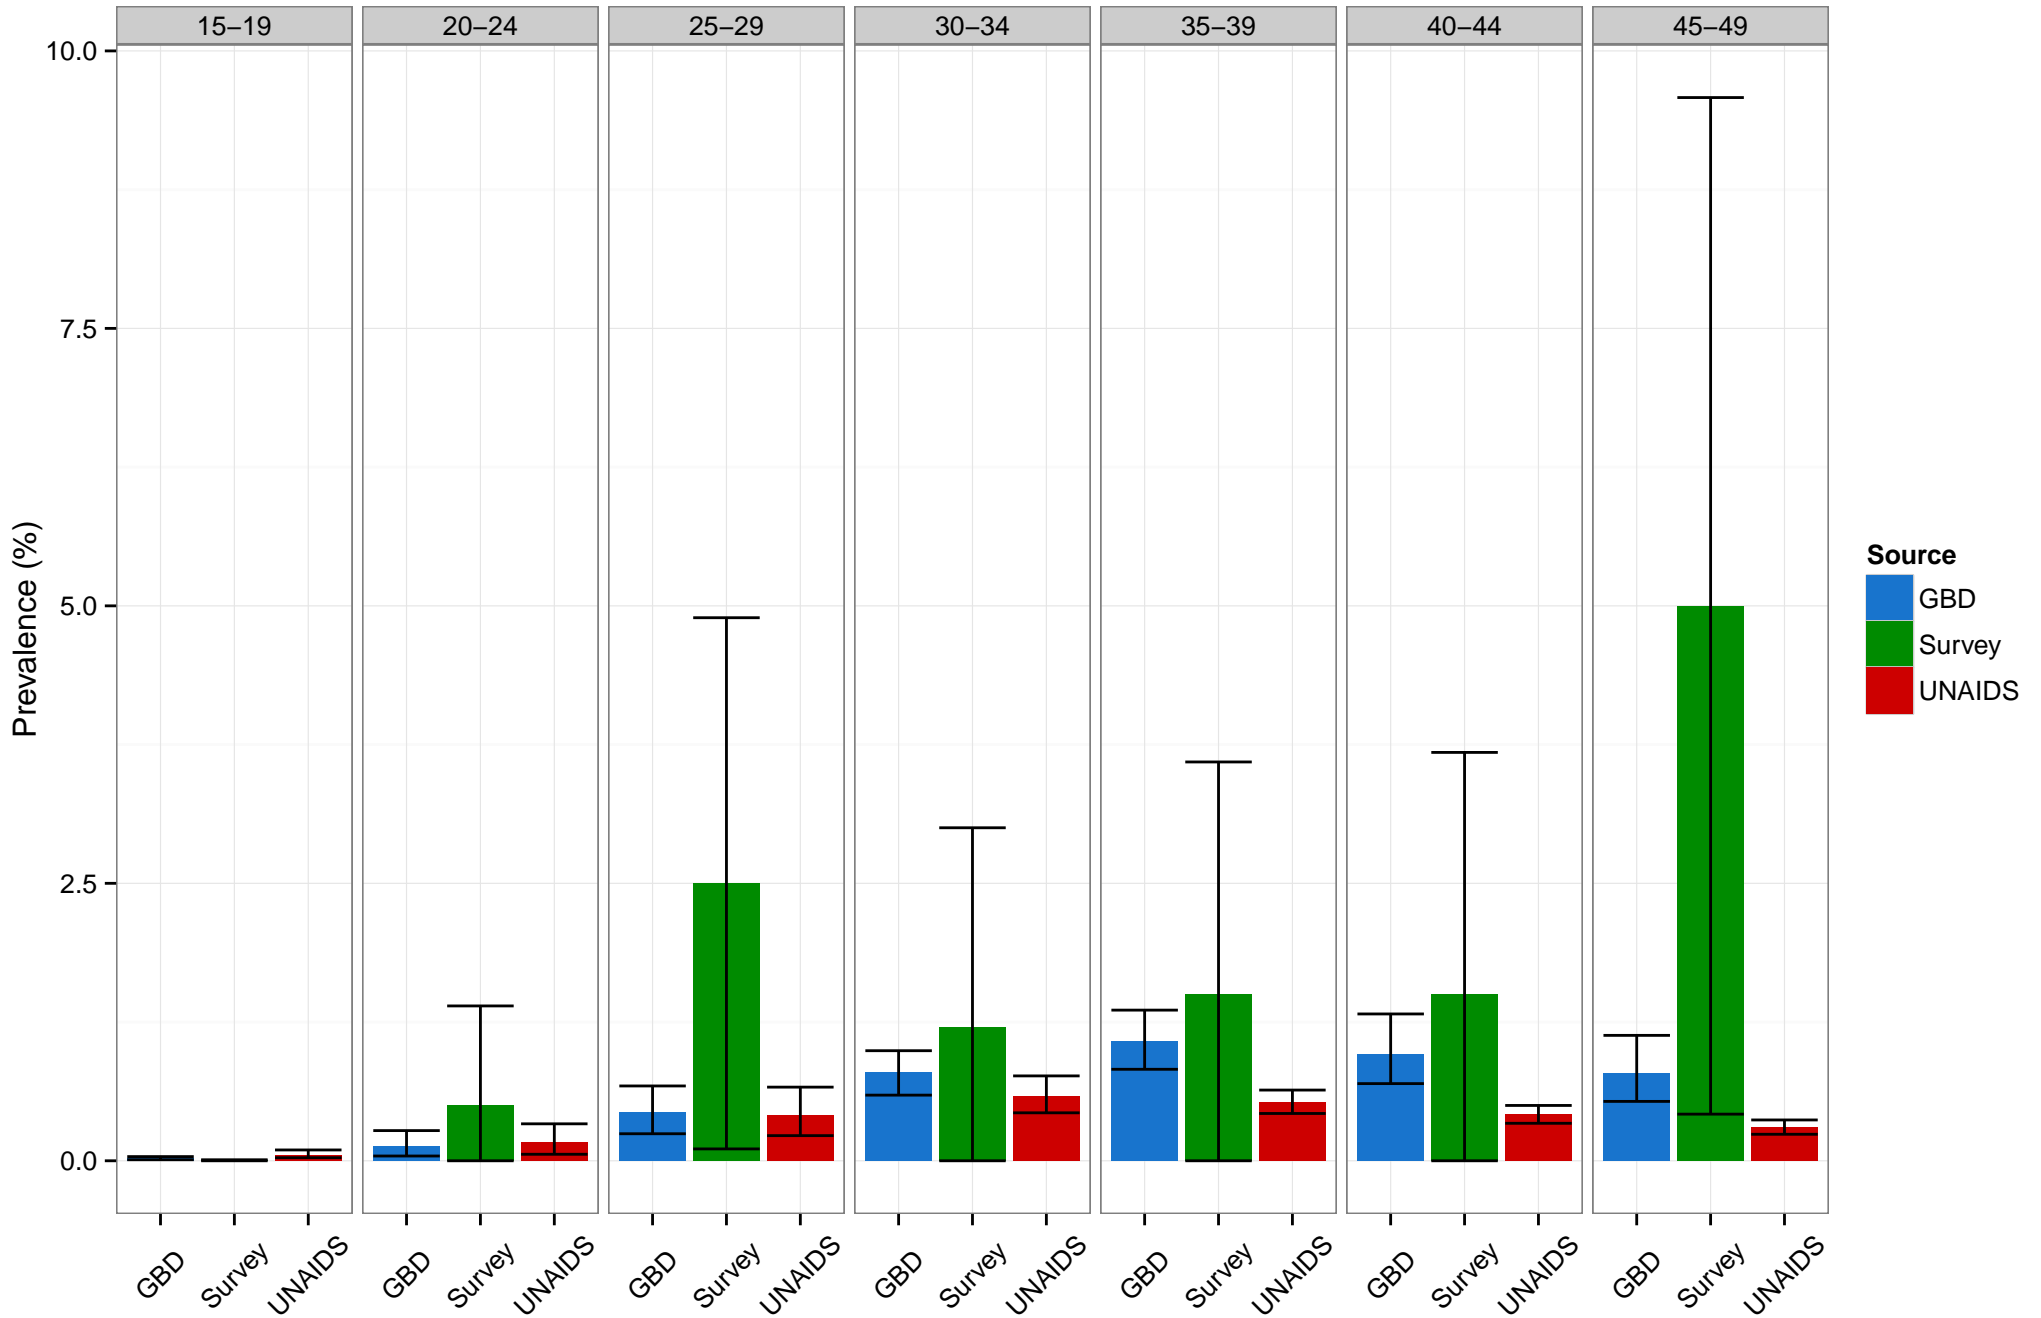

# HIV prevalence comparison to survey estimates by age-group with 95% confidence intervals

CPV 2005 Females

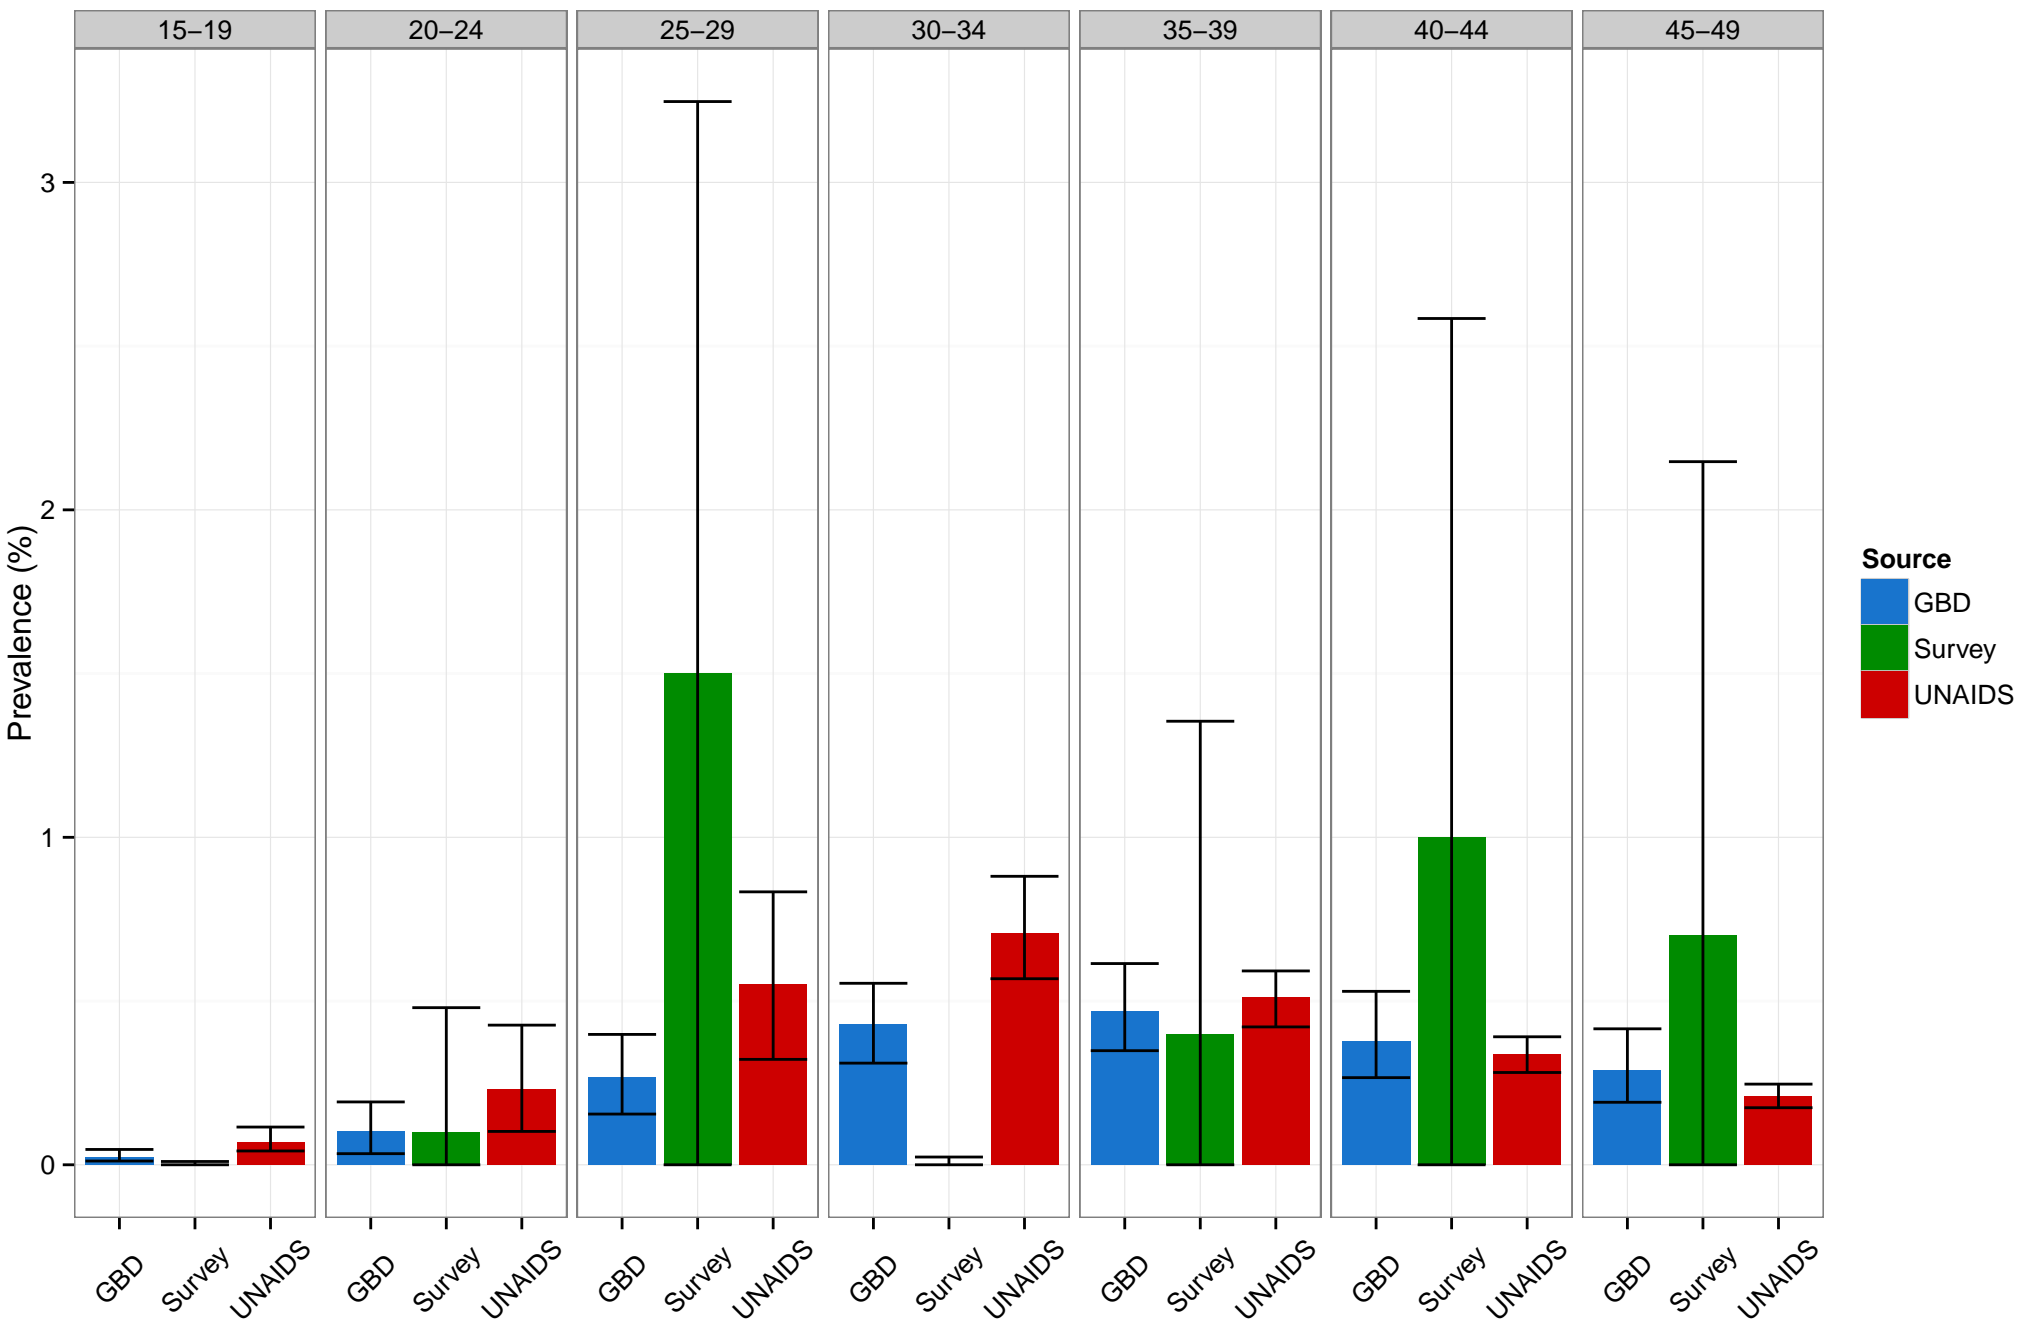



# HIV prevalence comparison to survey estimates by age-group with 95% confidence intervals

DOM 2002 Males

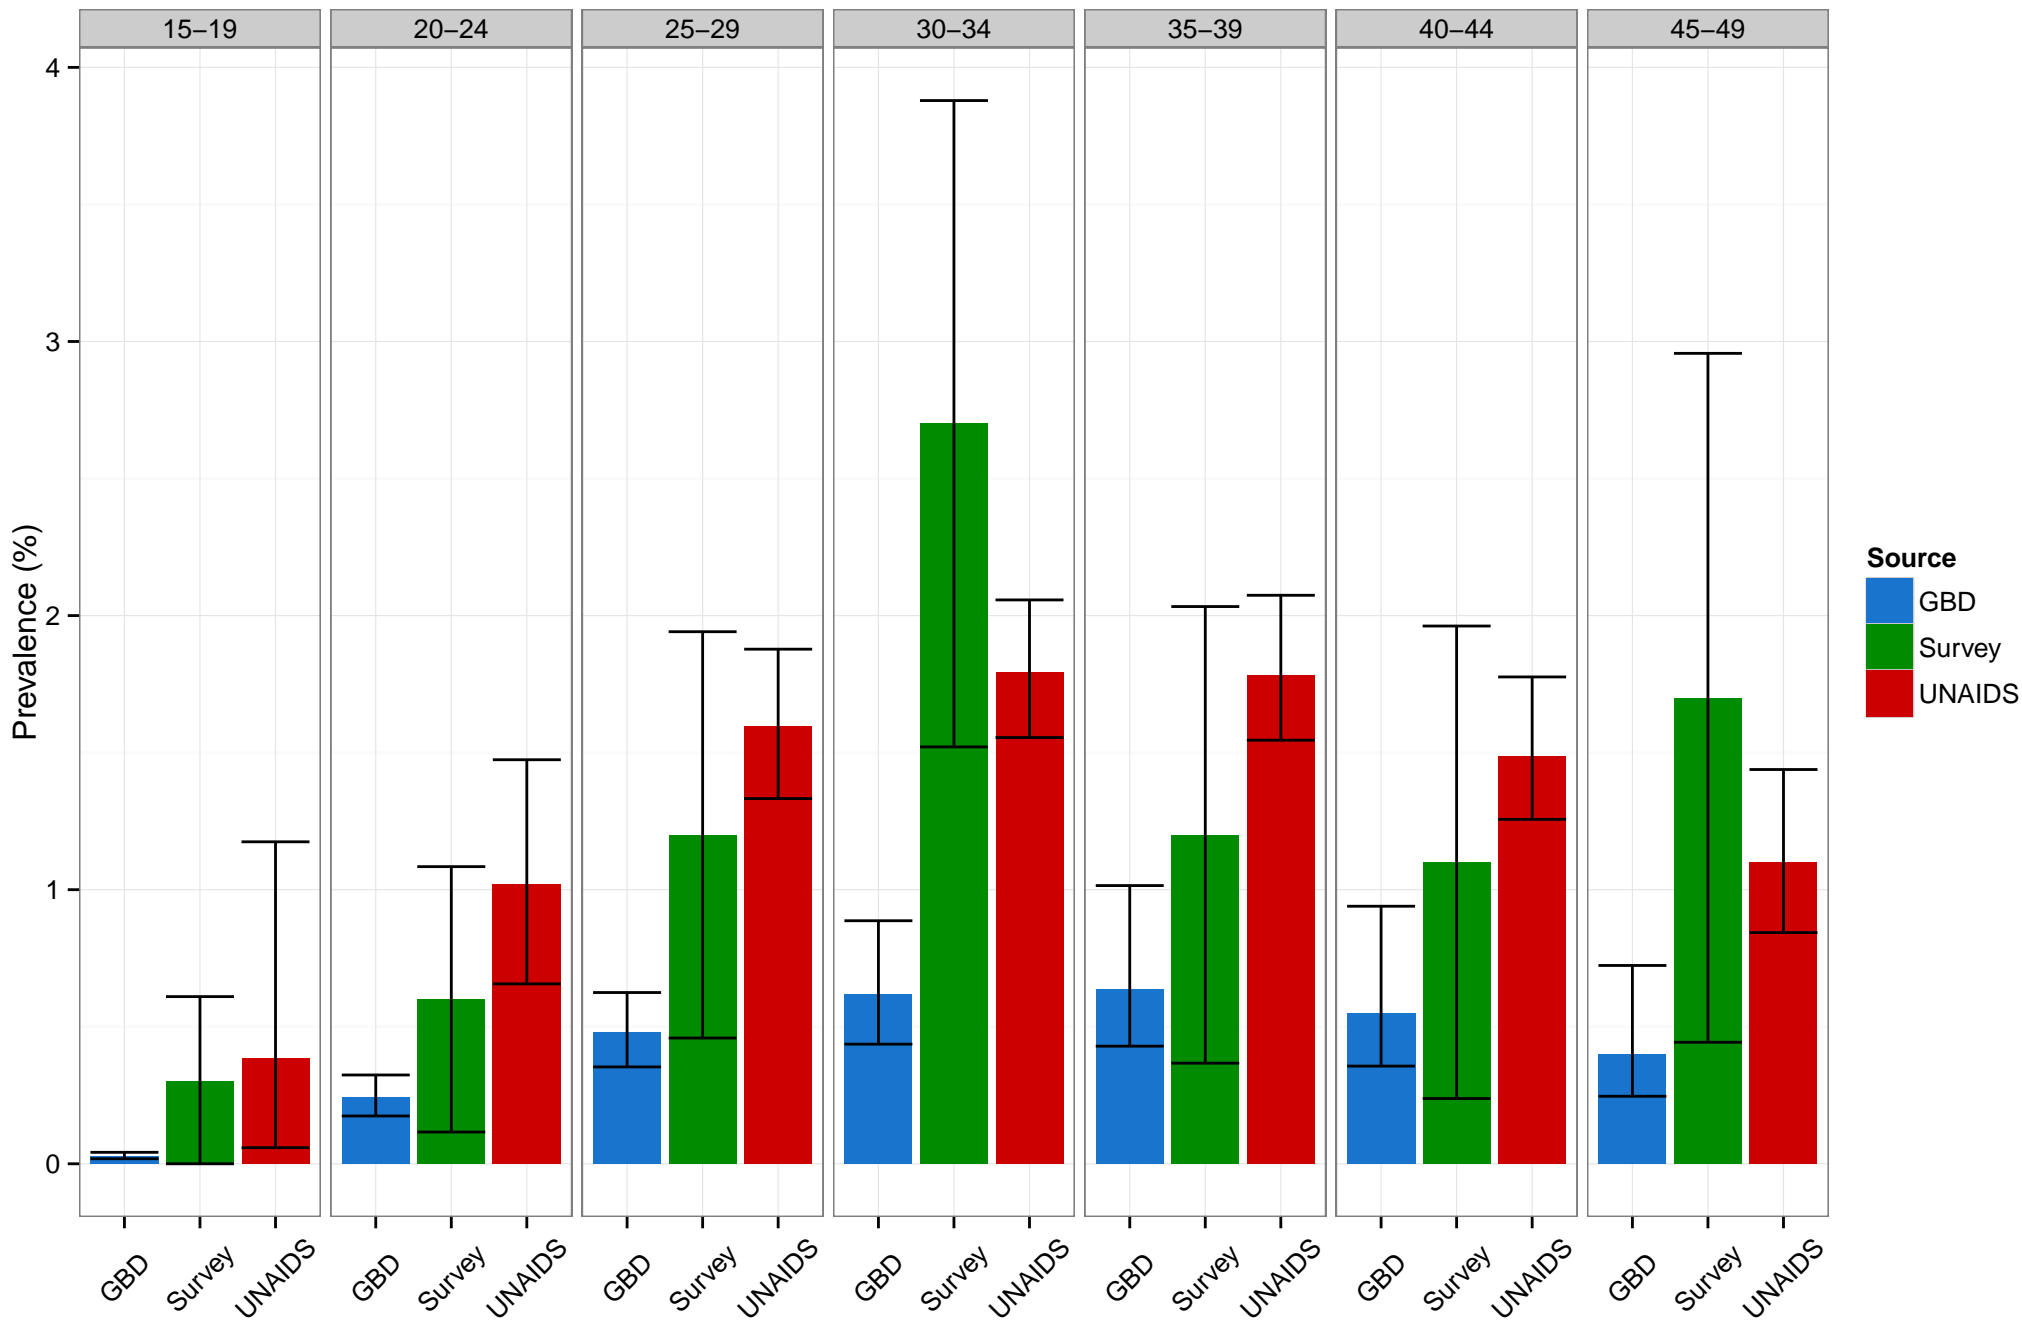

# HIV prevalence comparison to survey estimates by age-group with 95% confidence intervals

DOM 2002 Females

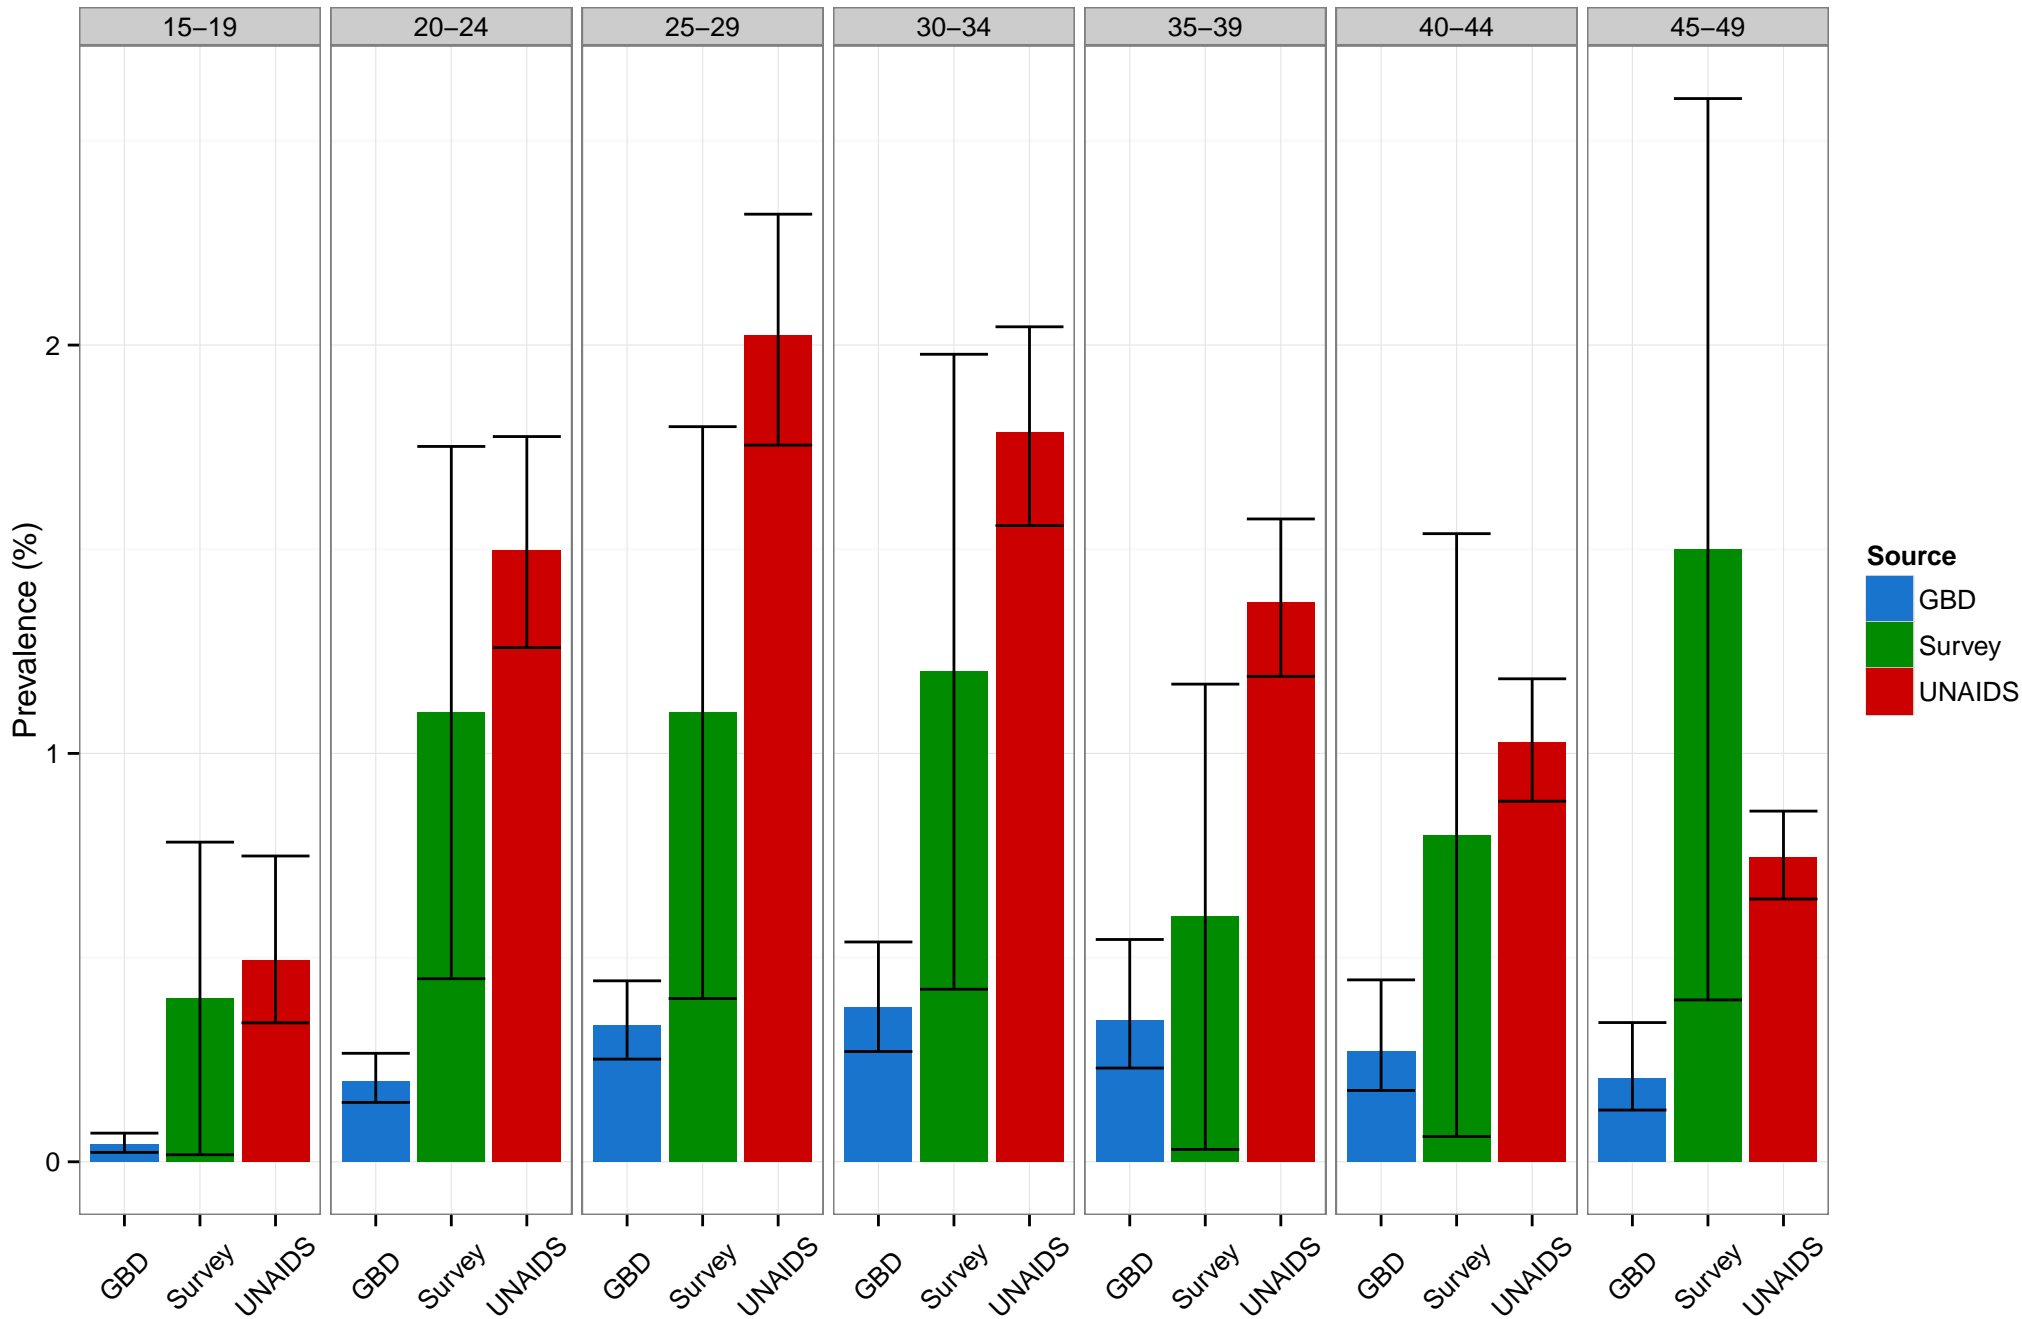

# HIV prevalence comparison to survey estimates by age-group with 95% confidence intervals

DOM 2007 Males

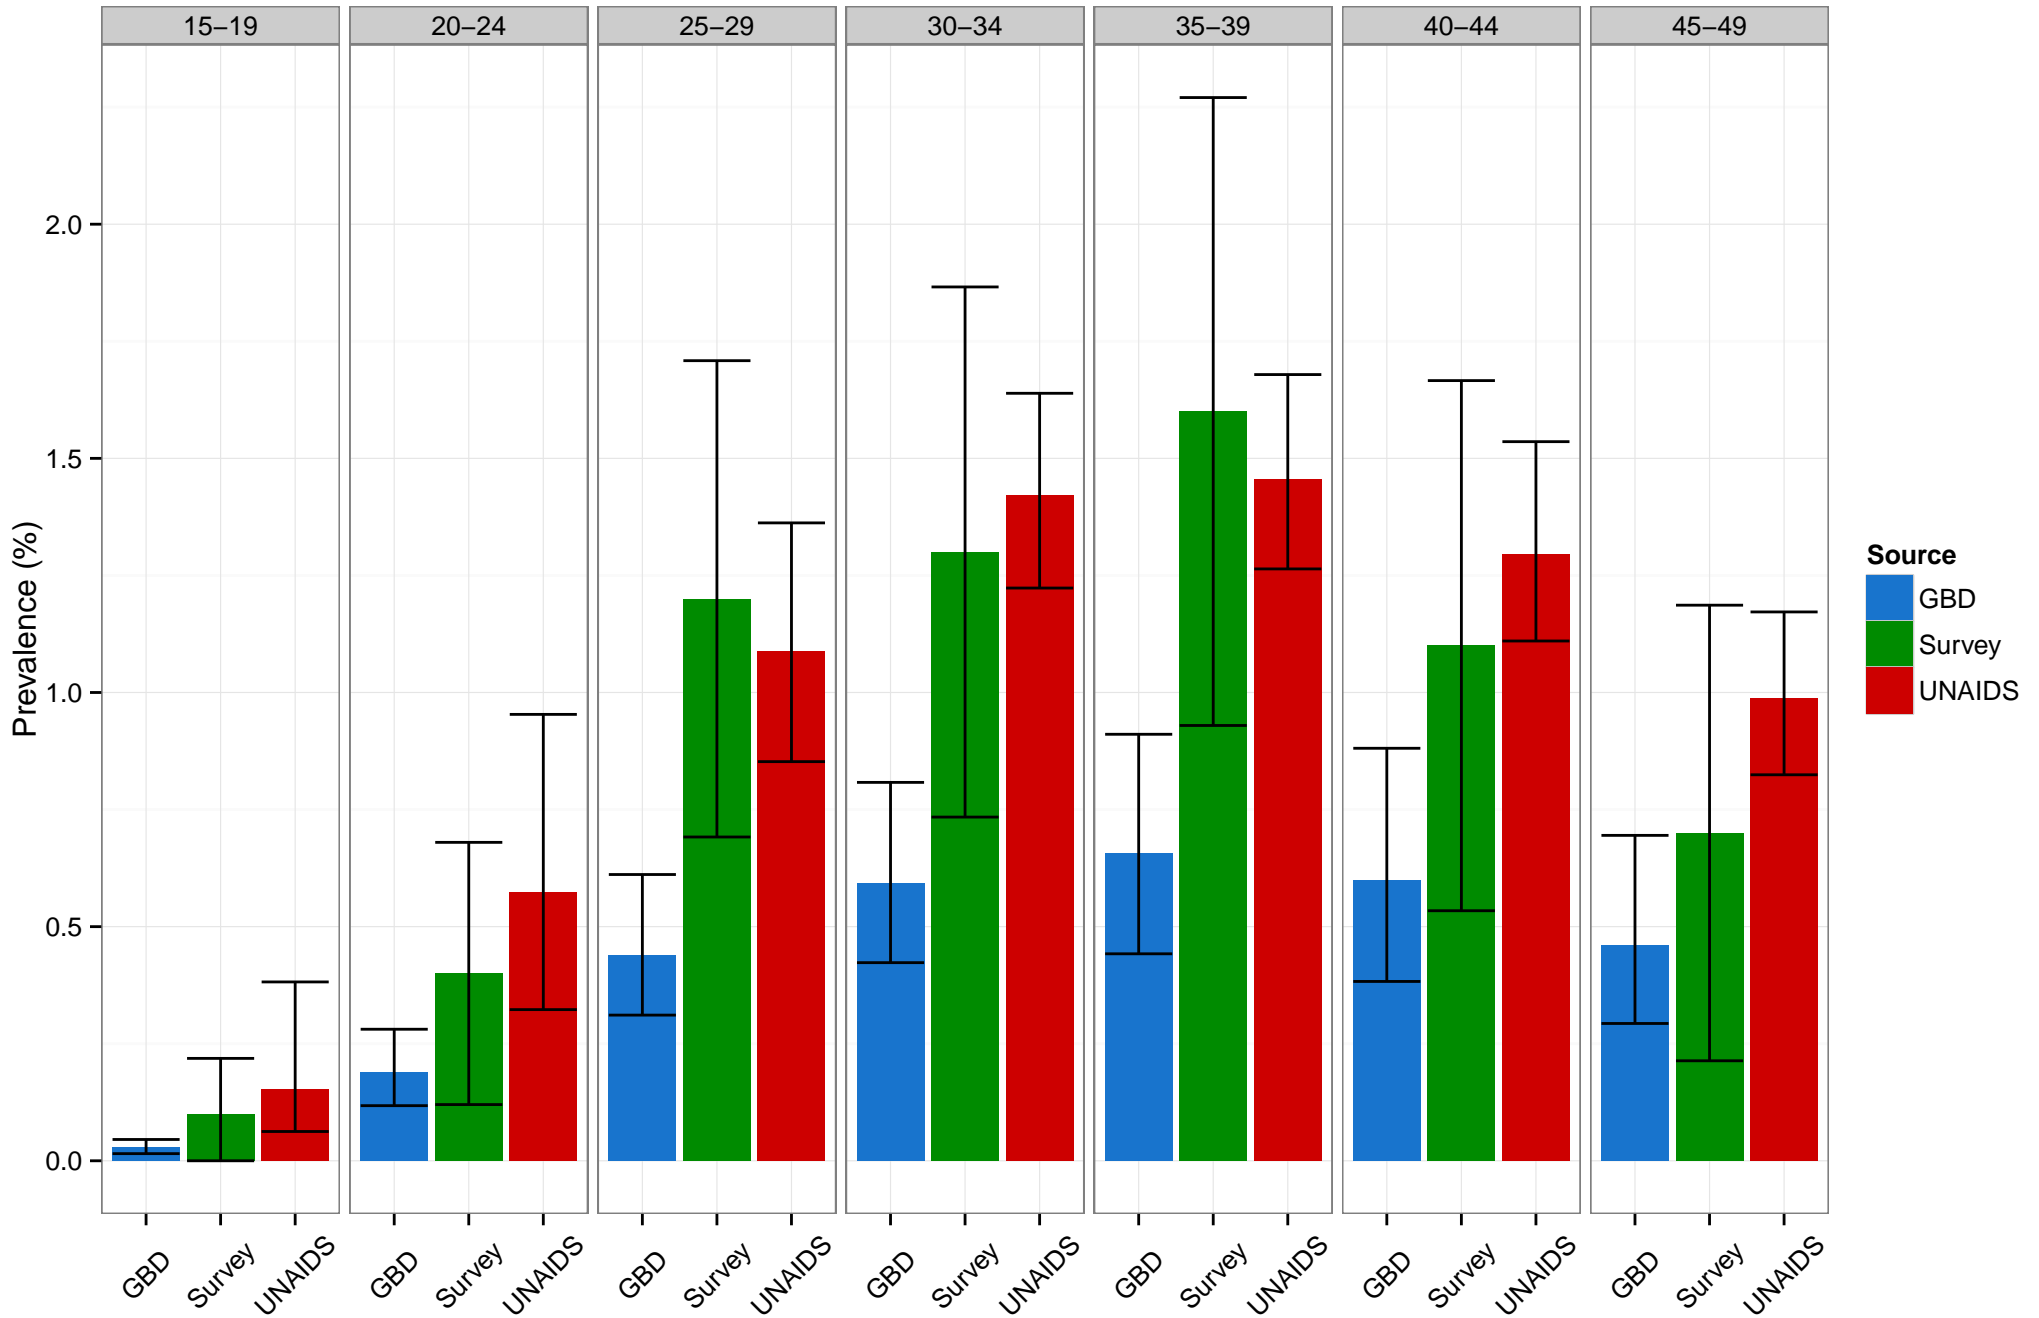

# HIV prevalence comparison to survey estimates by age-group with 95% confidence intervals

DOM 2007 Females

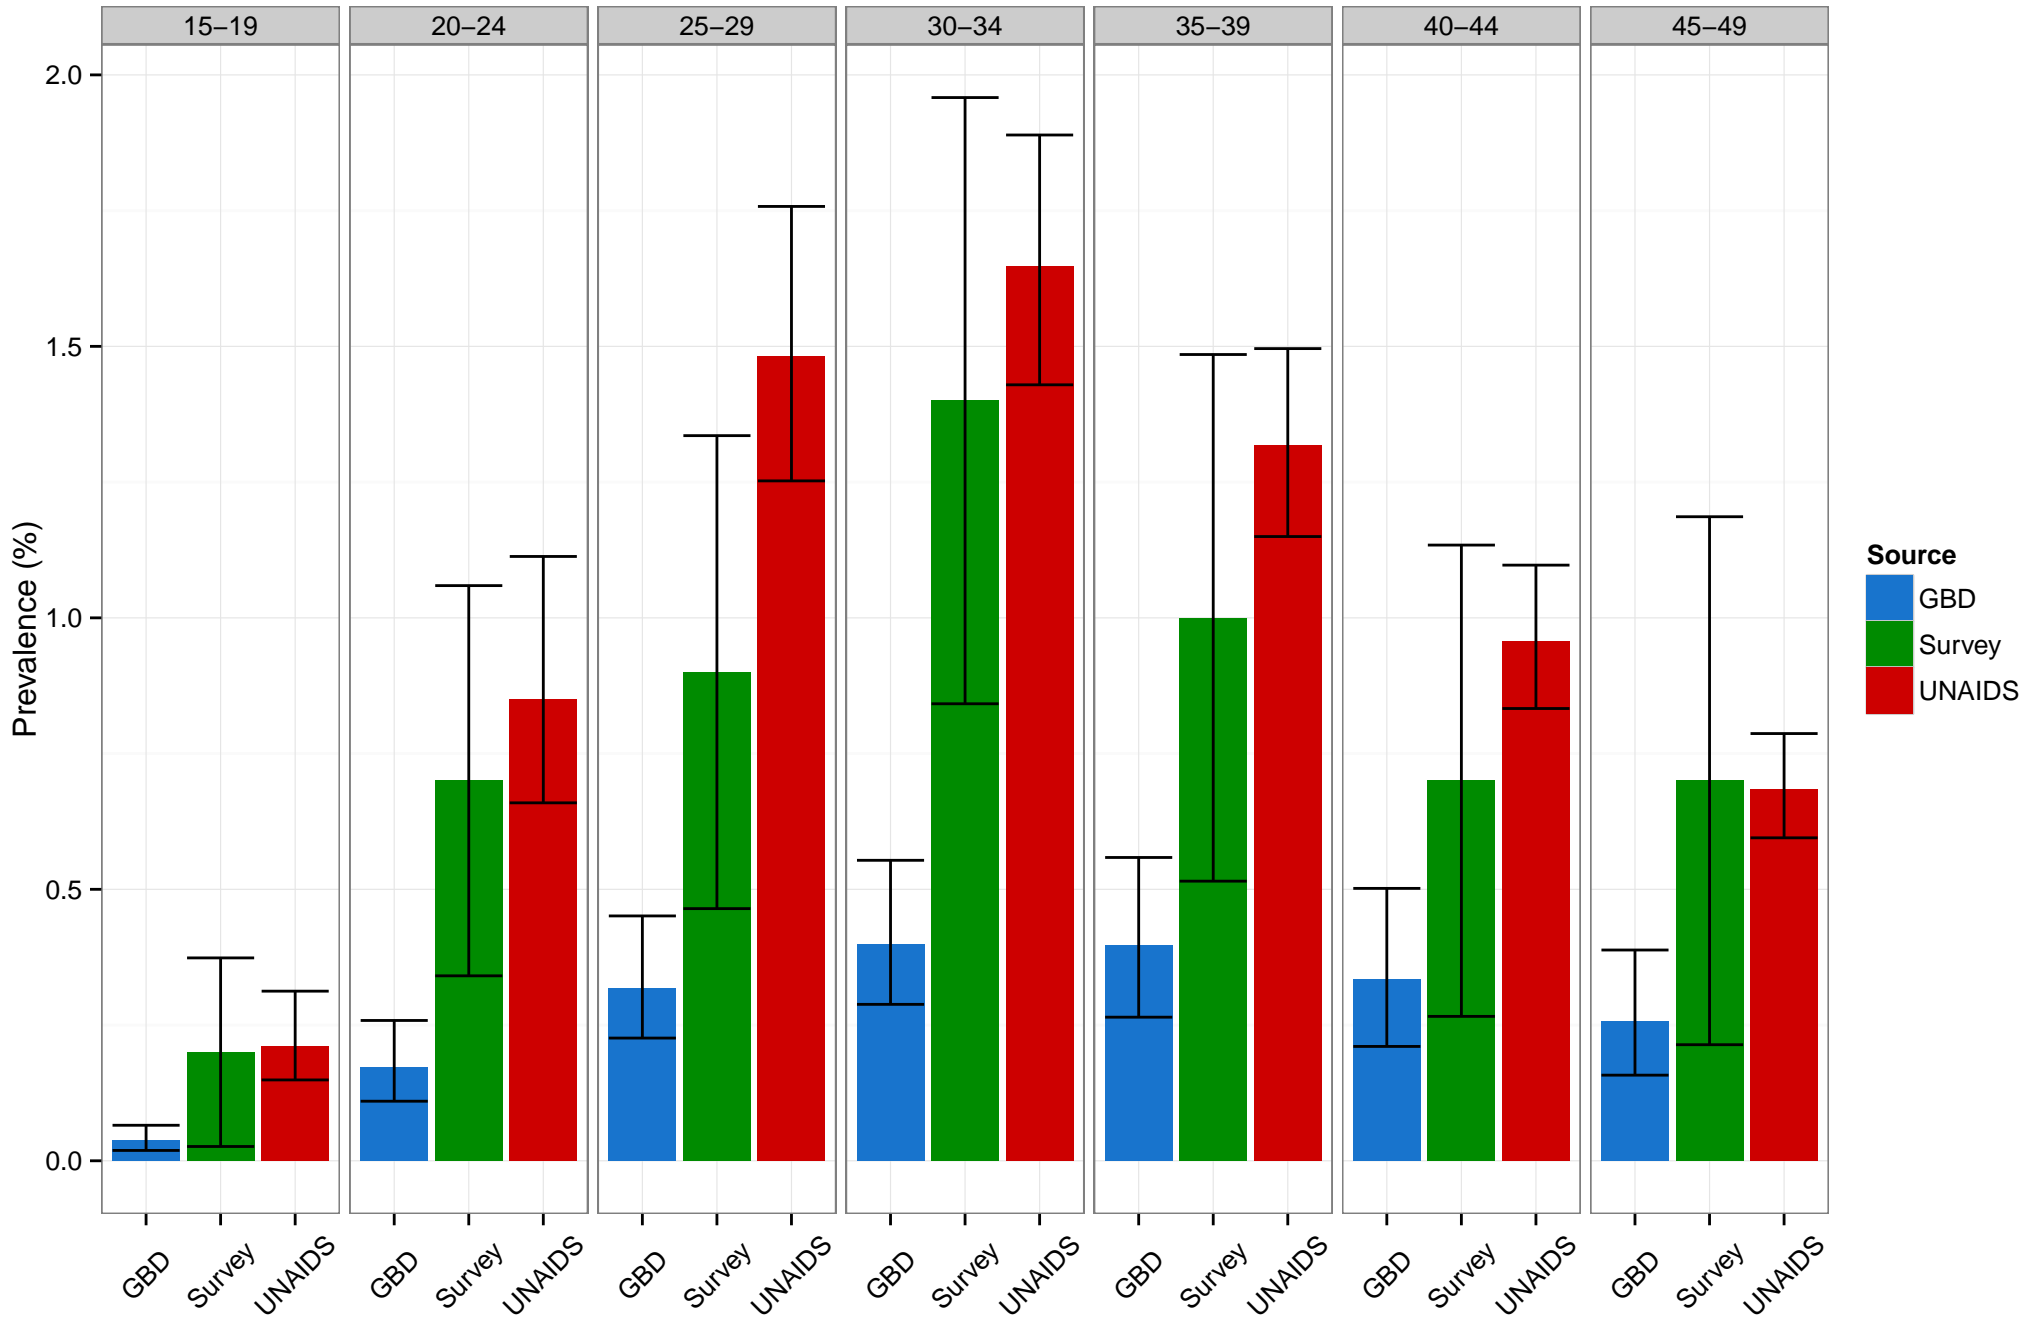

# HIV prevalence comparison to survey estimates by age-group with 95% confidence intervals

ETH 2005 Males

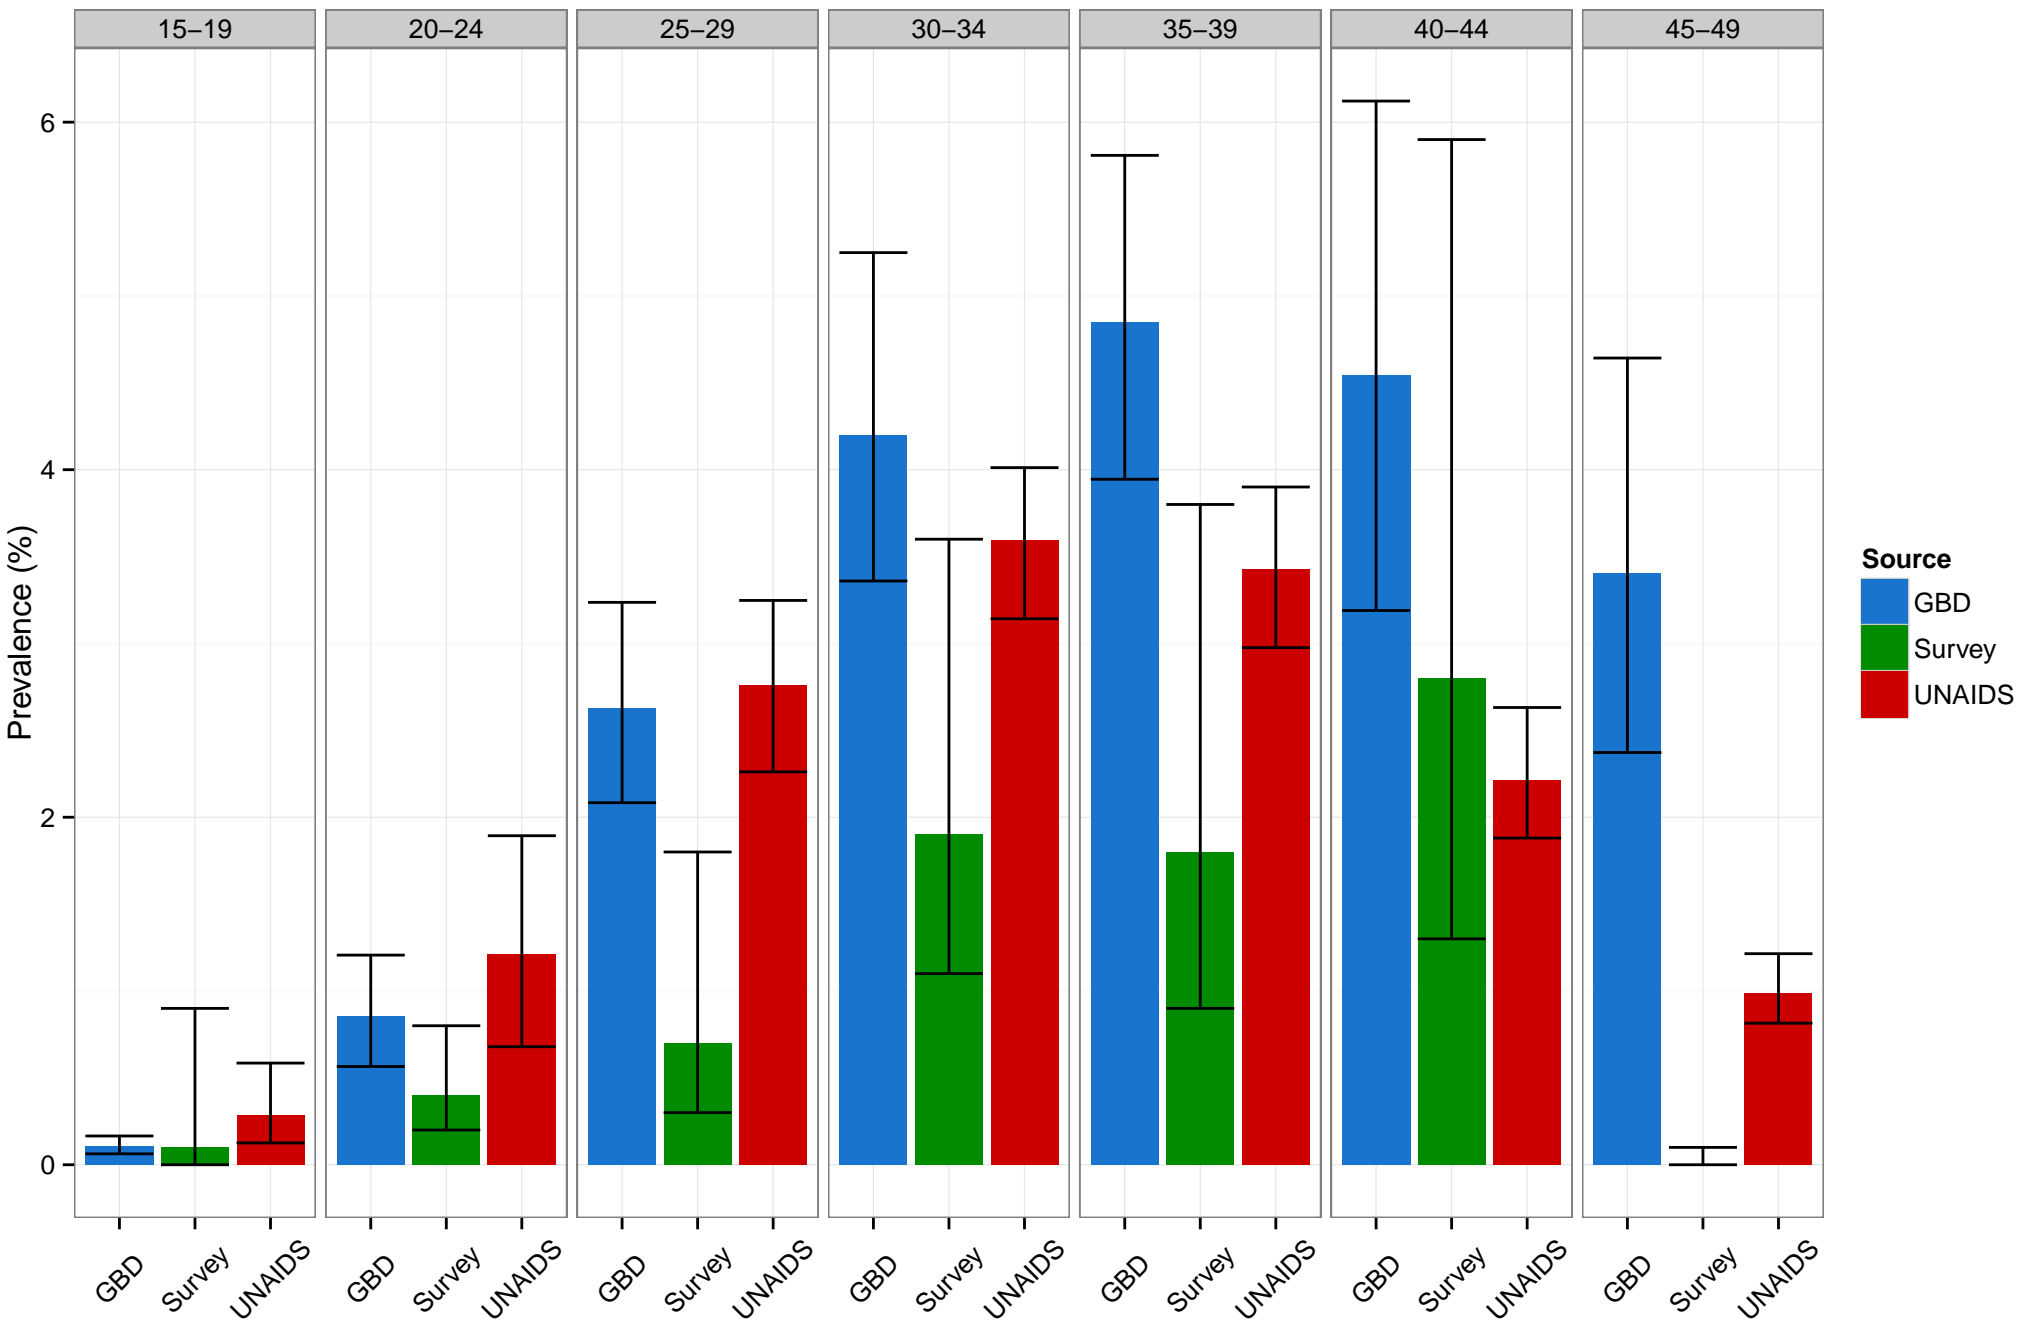

# HIV prevalence comparison to survey estimates by age-group with 95% confidence intervals

ETH 2005 Females

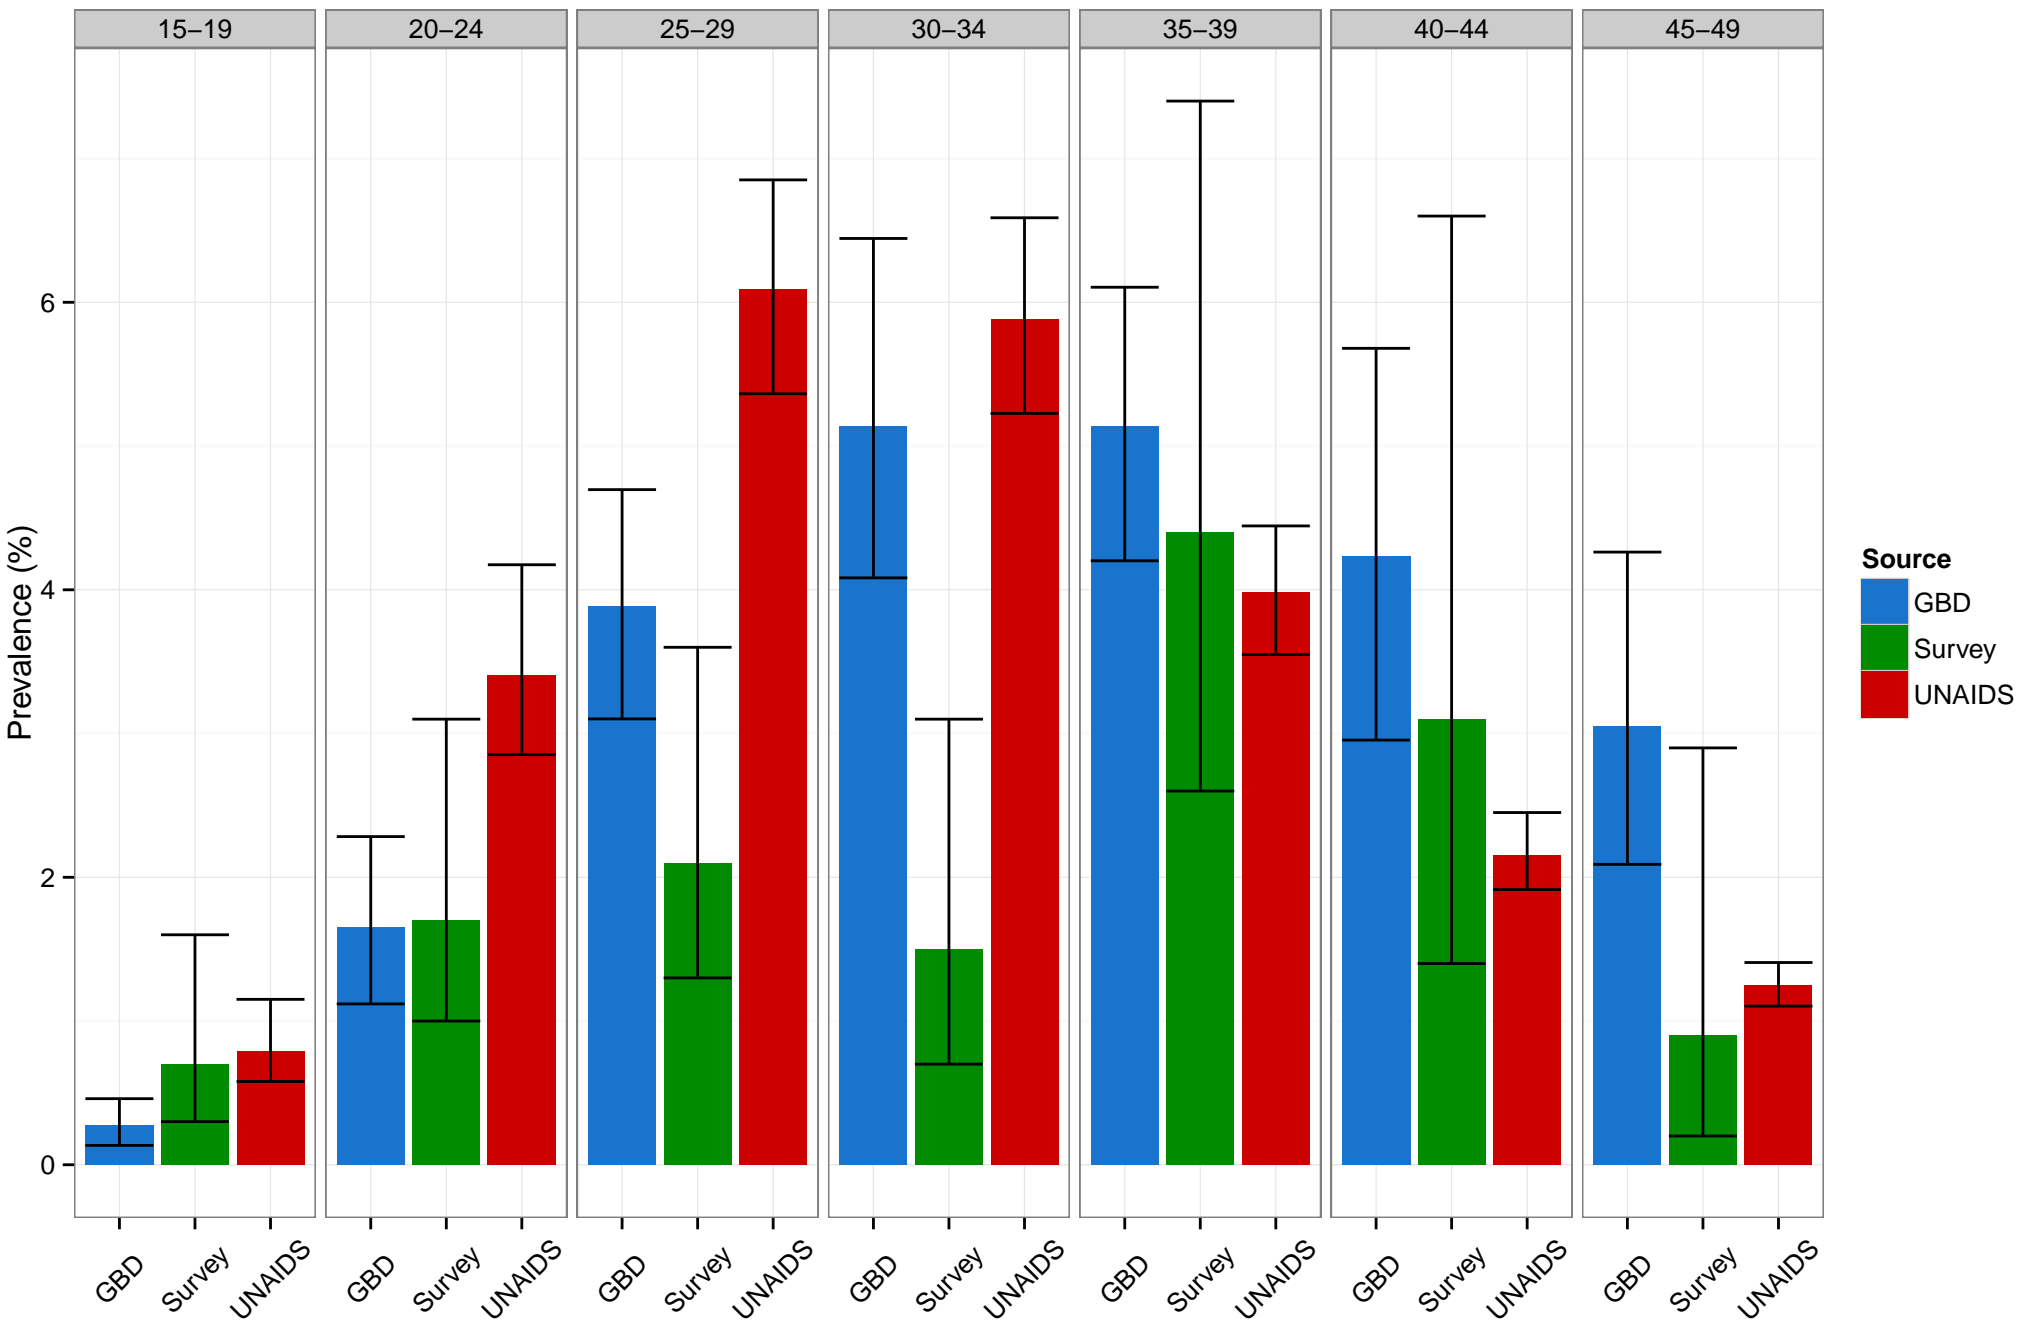

# HIV prevalence comparison to survey estimates by age-group with 95% confidence intervals

ETH 2011 Males

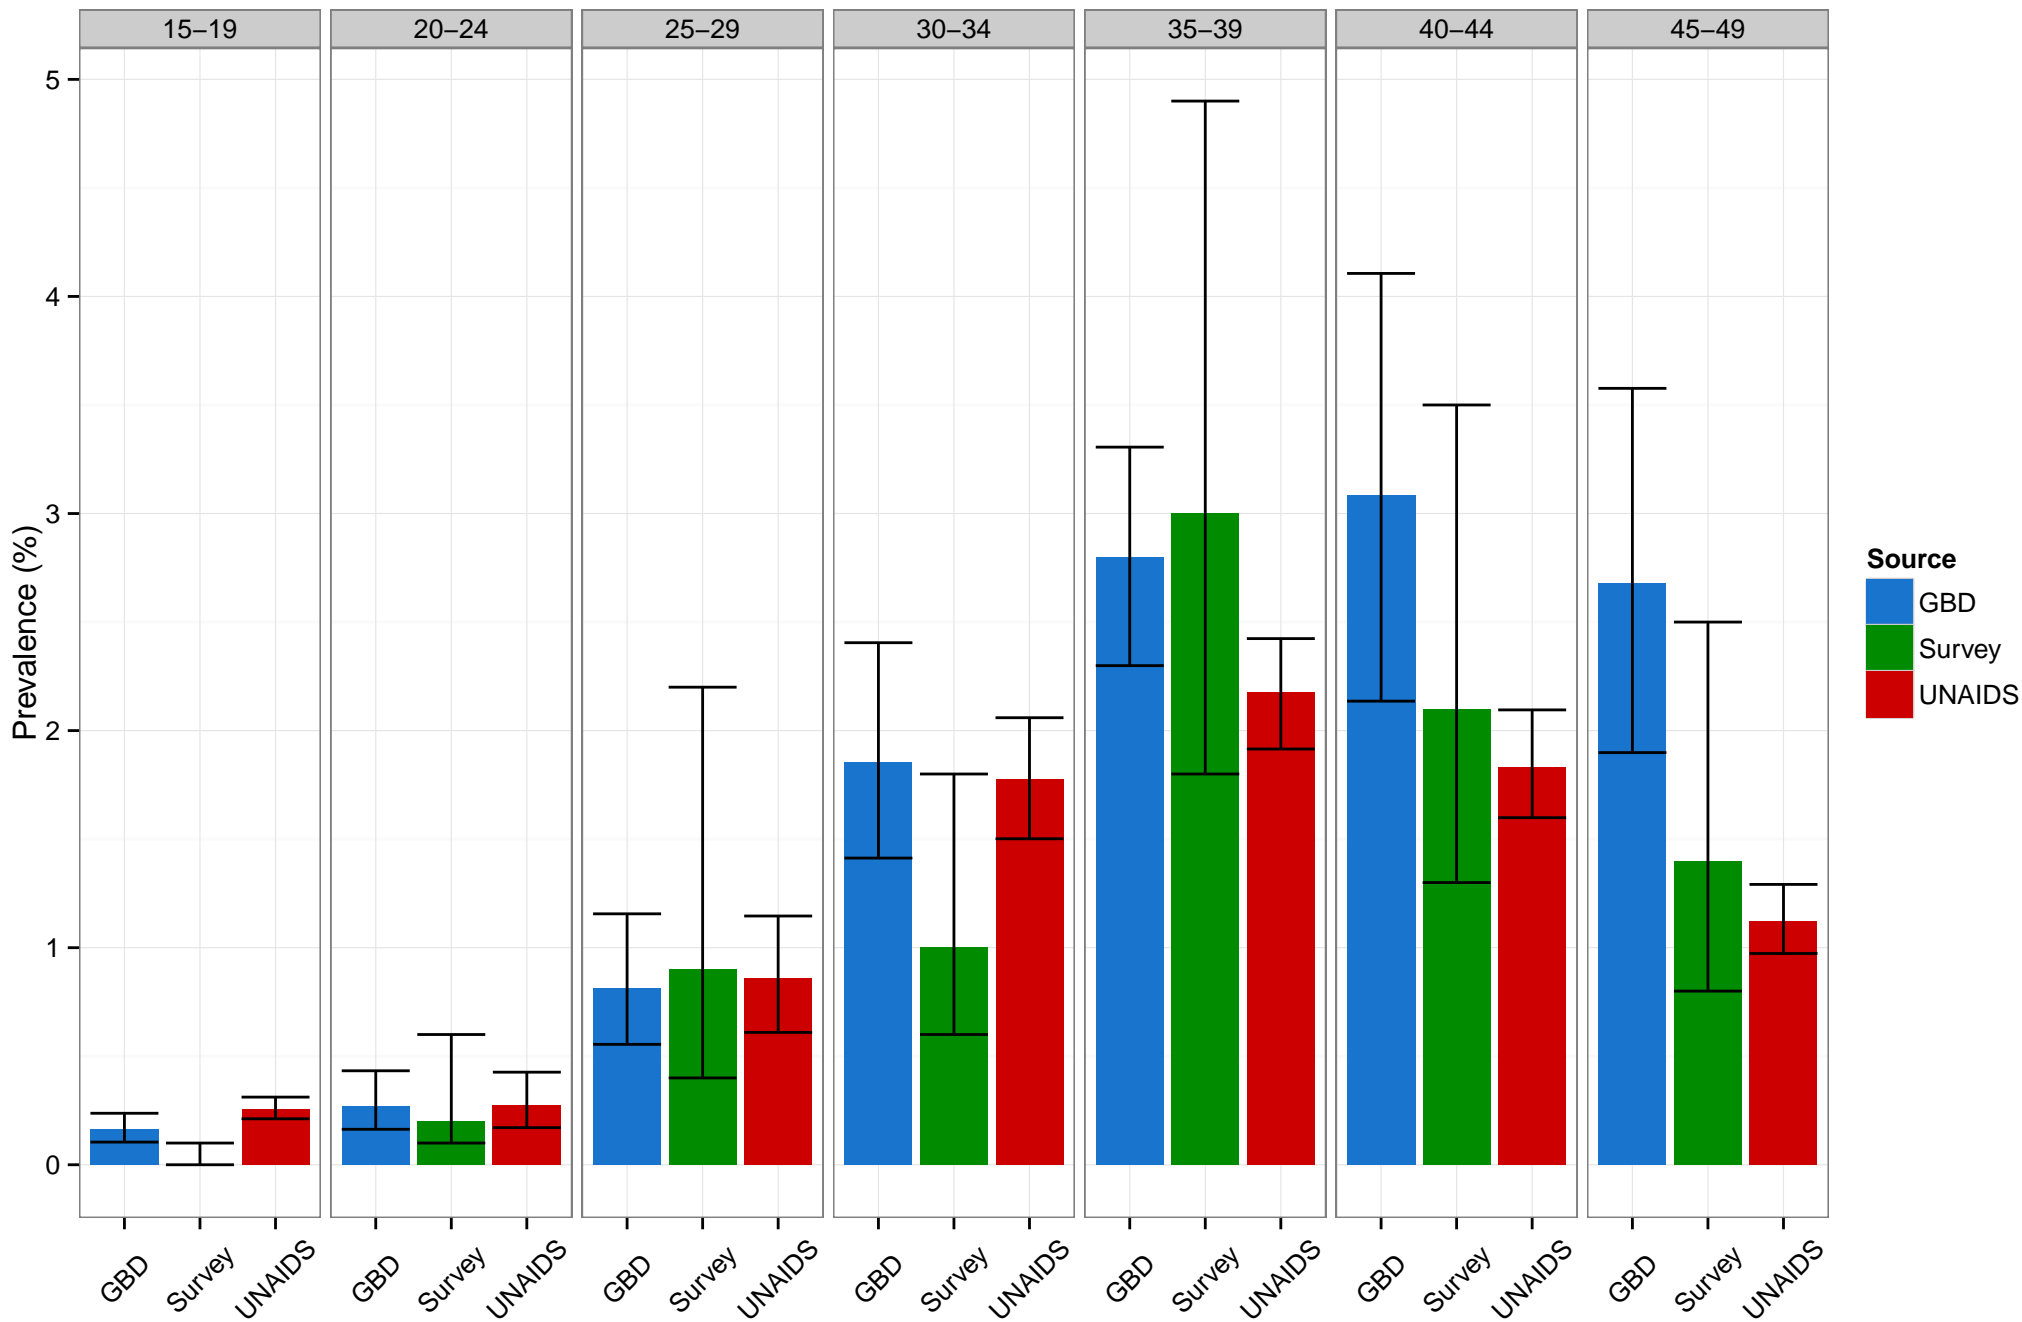

# HIV prevalence comparison to survey estimates by age-group with 95% confidence intervals

ETH 2011 Females

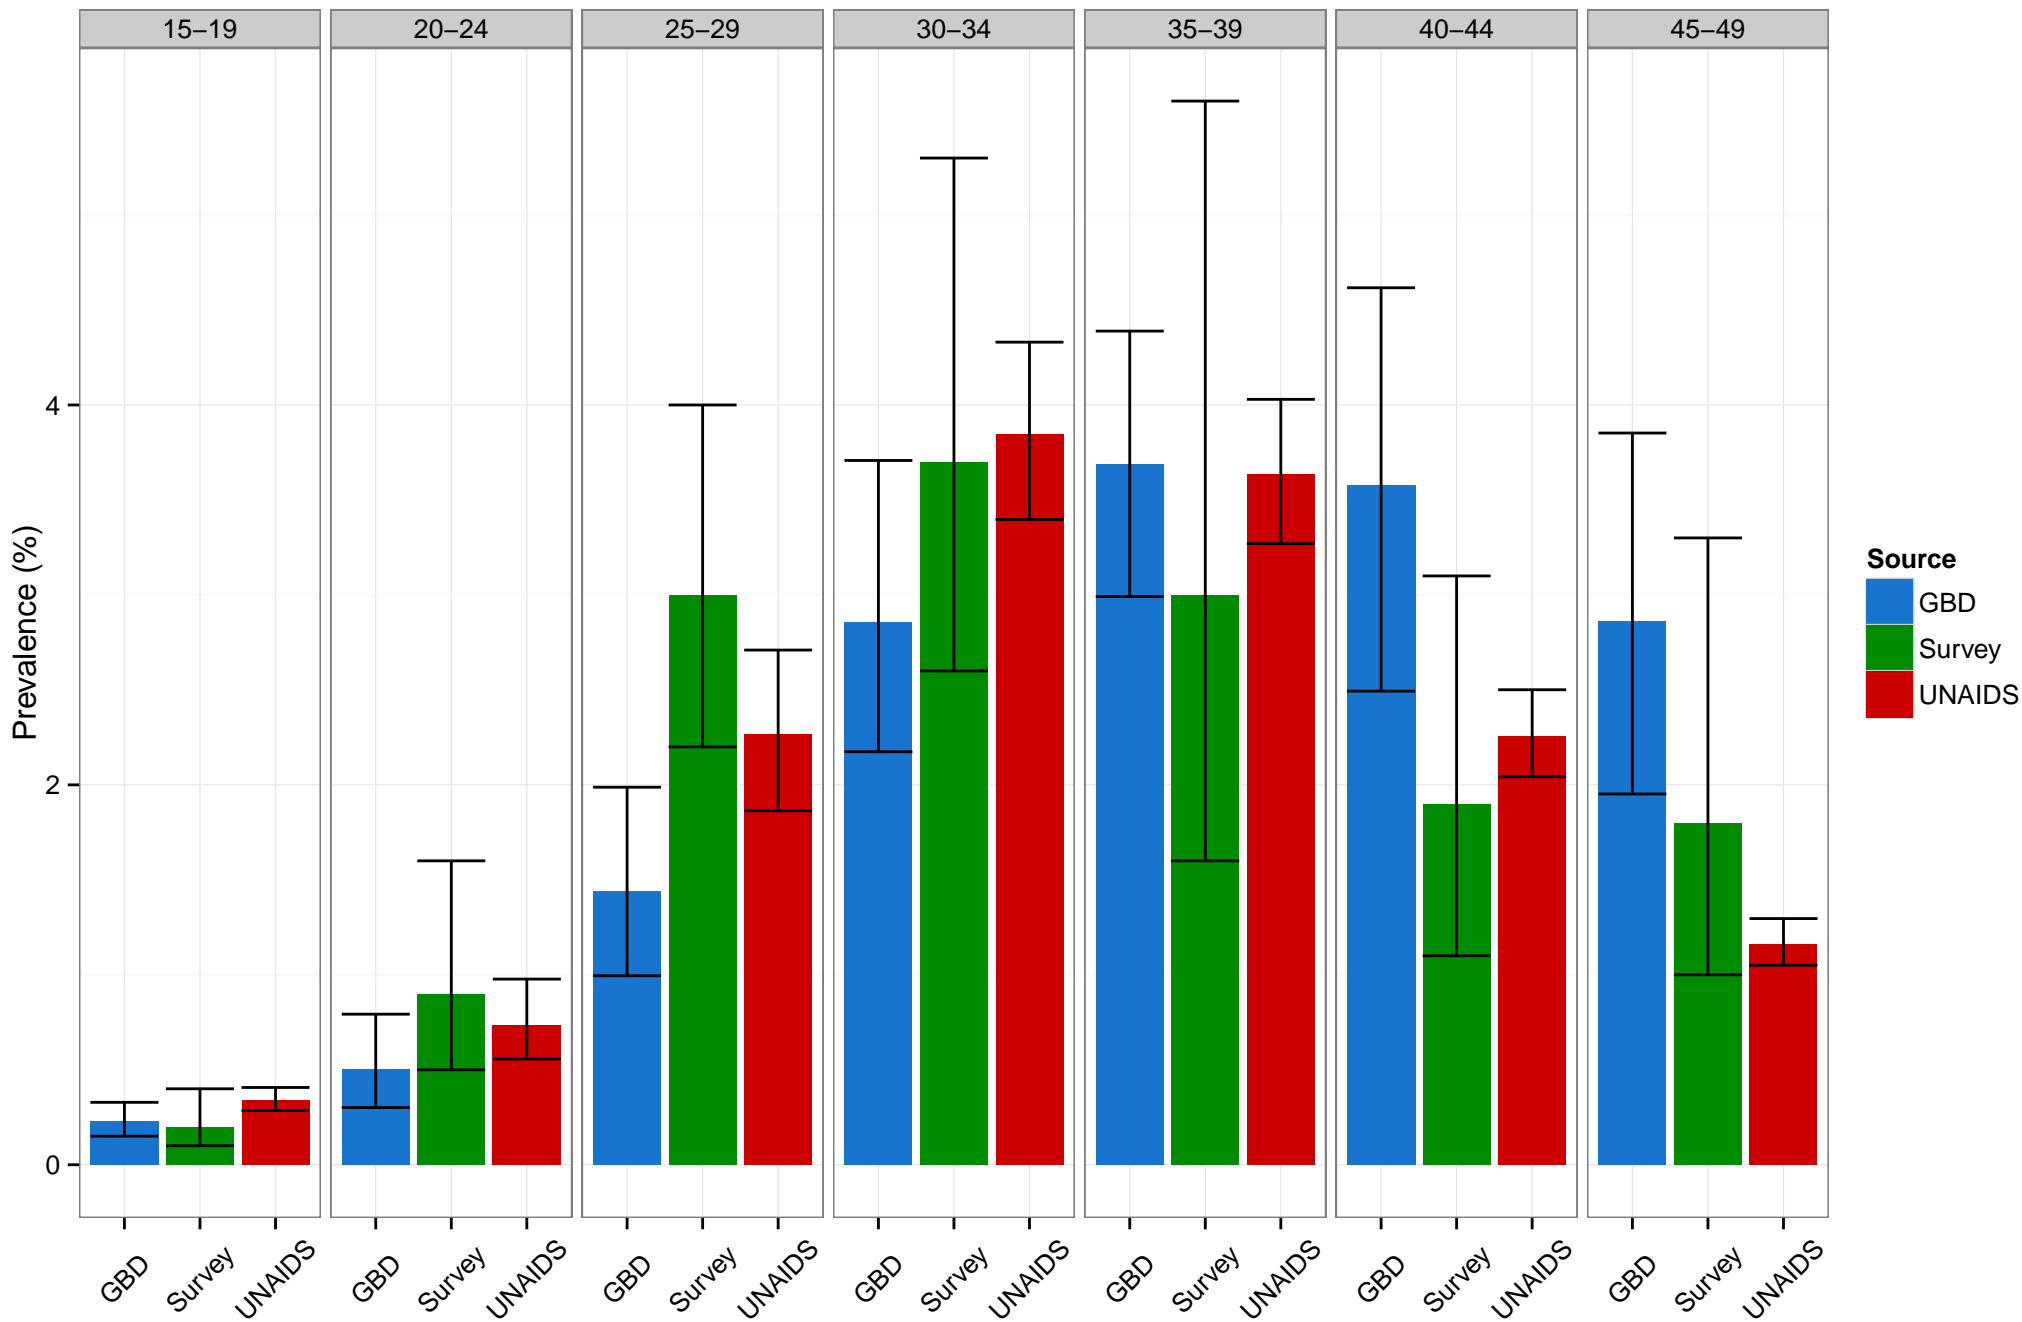



# HIV prevalence comparison to survey estimates by age-group with 95% confidence intervals

GAB 2012 Males

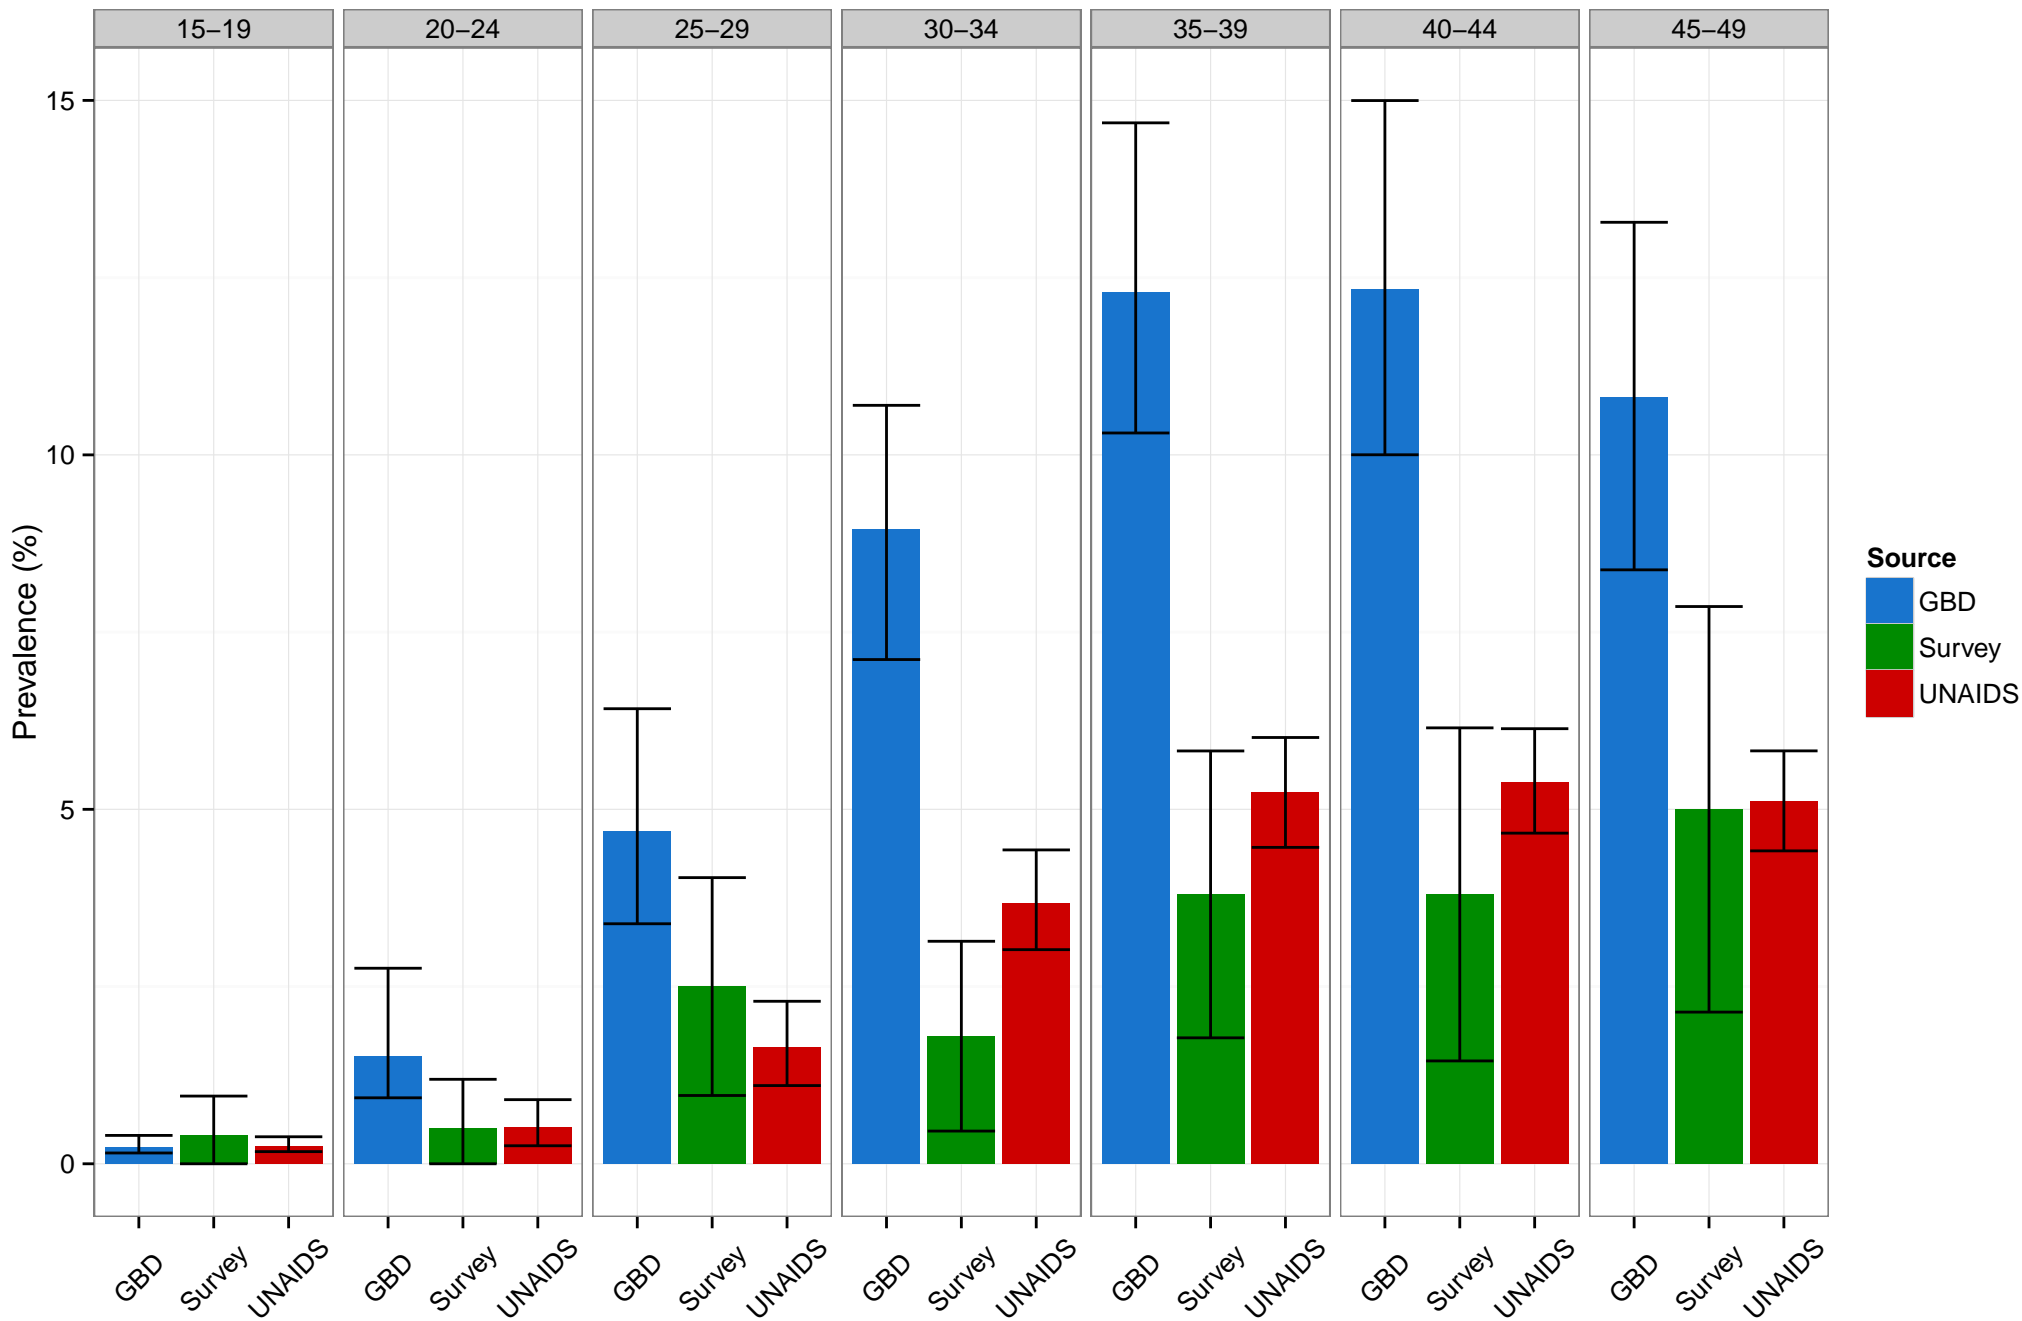

# HIV prevalence comparison to survey estimates by age-group with 95% confidence intervals

GAB 2012 Females

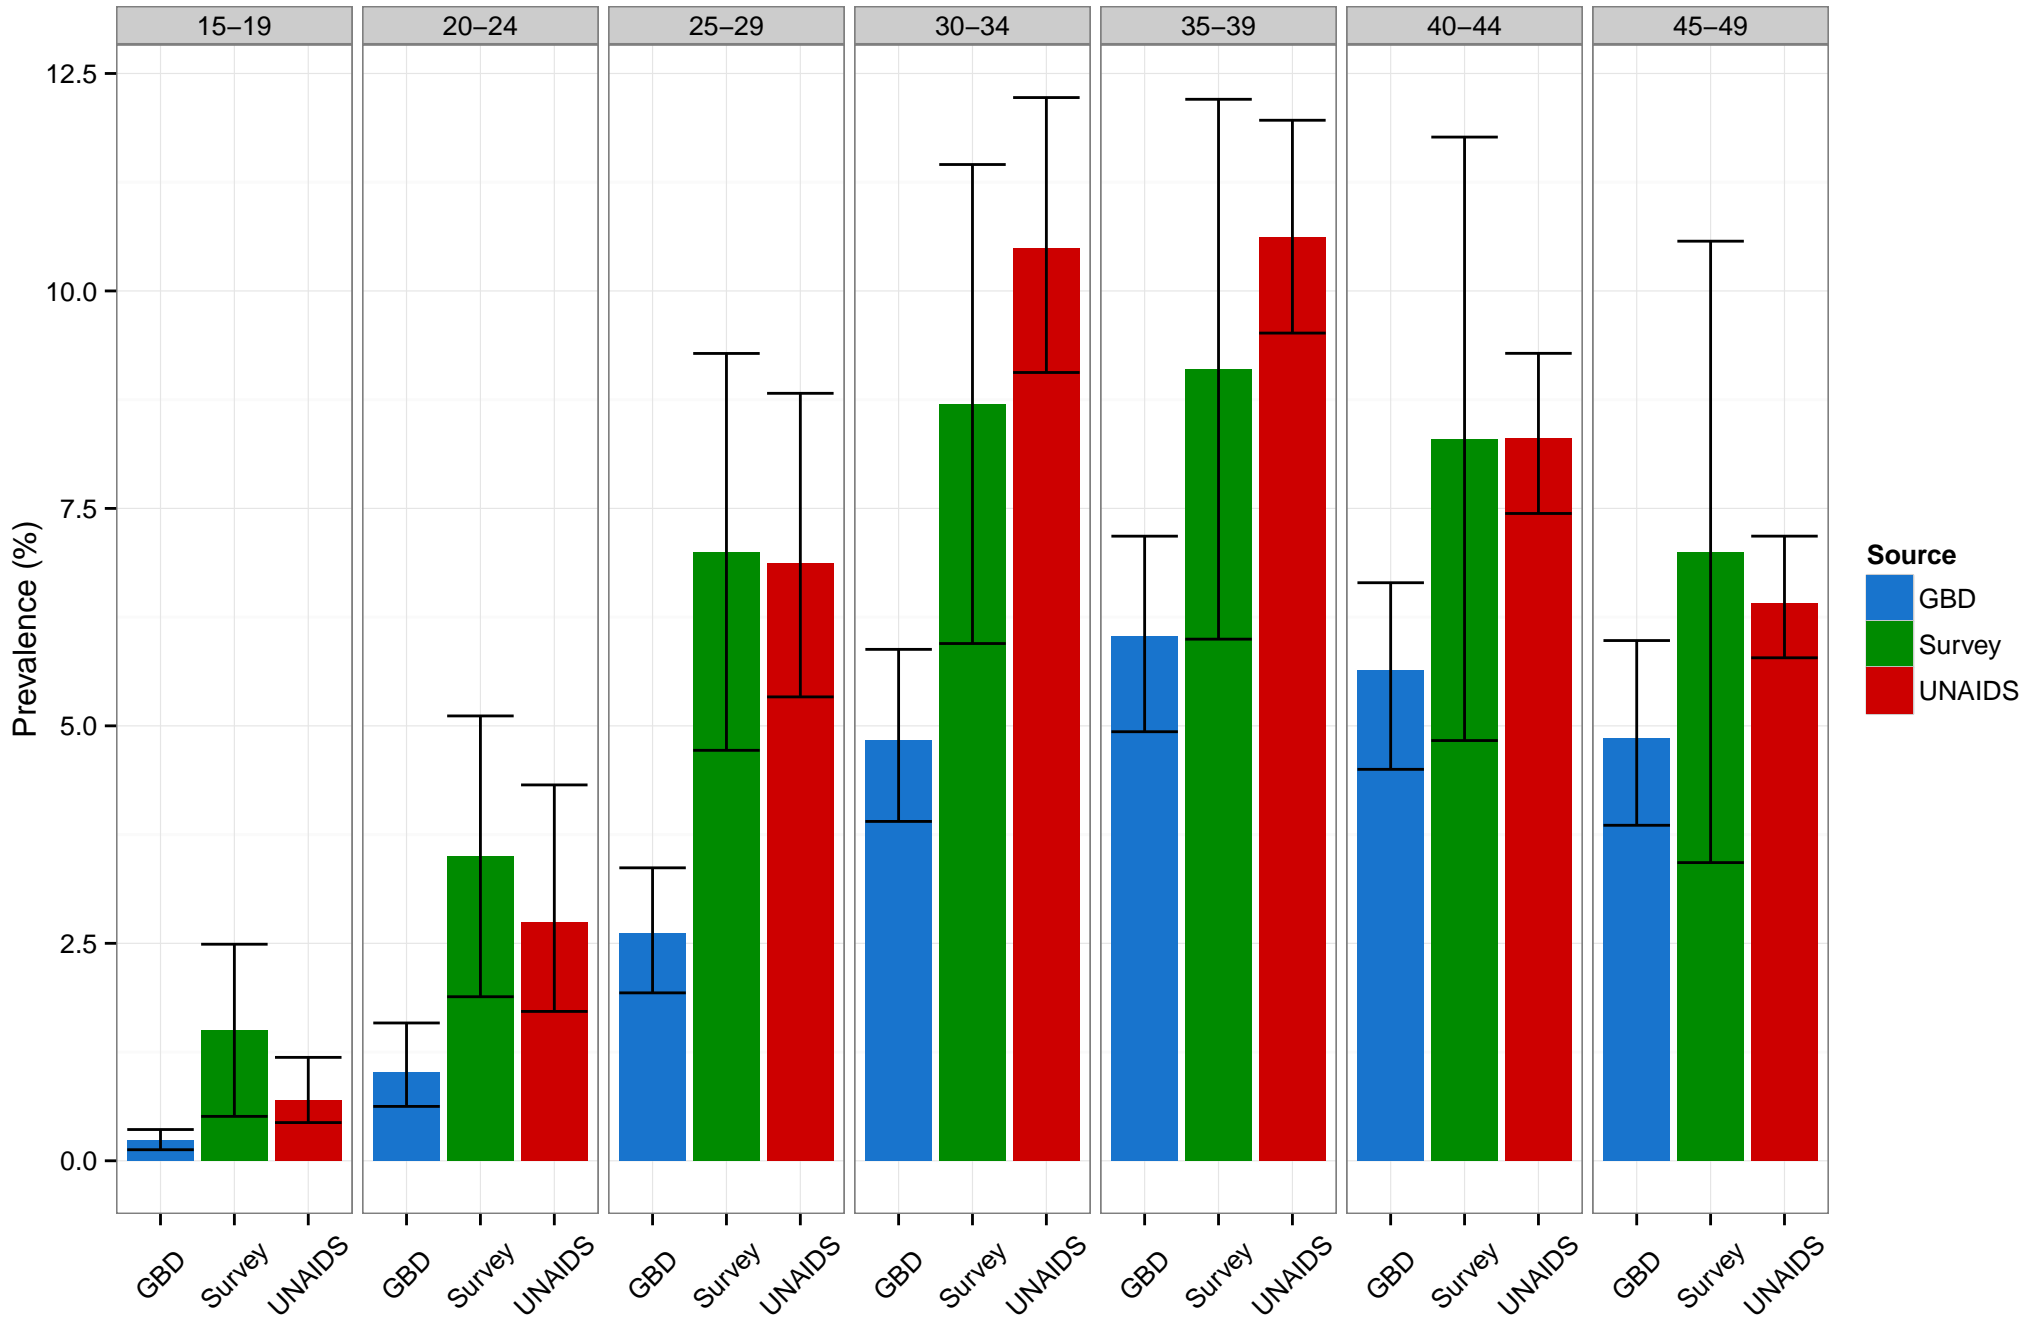

# HIV prevalence comparison to survey estimates by age-group with 95% confidence intervals

GHA 2003 Males

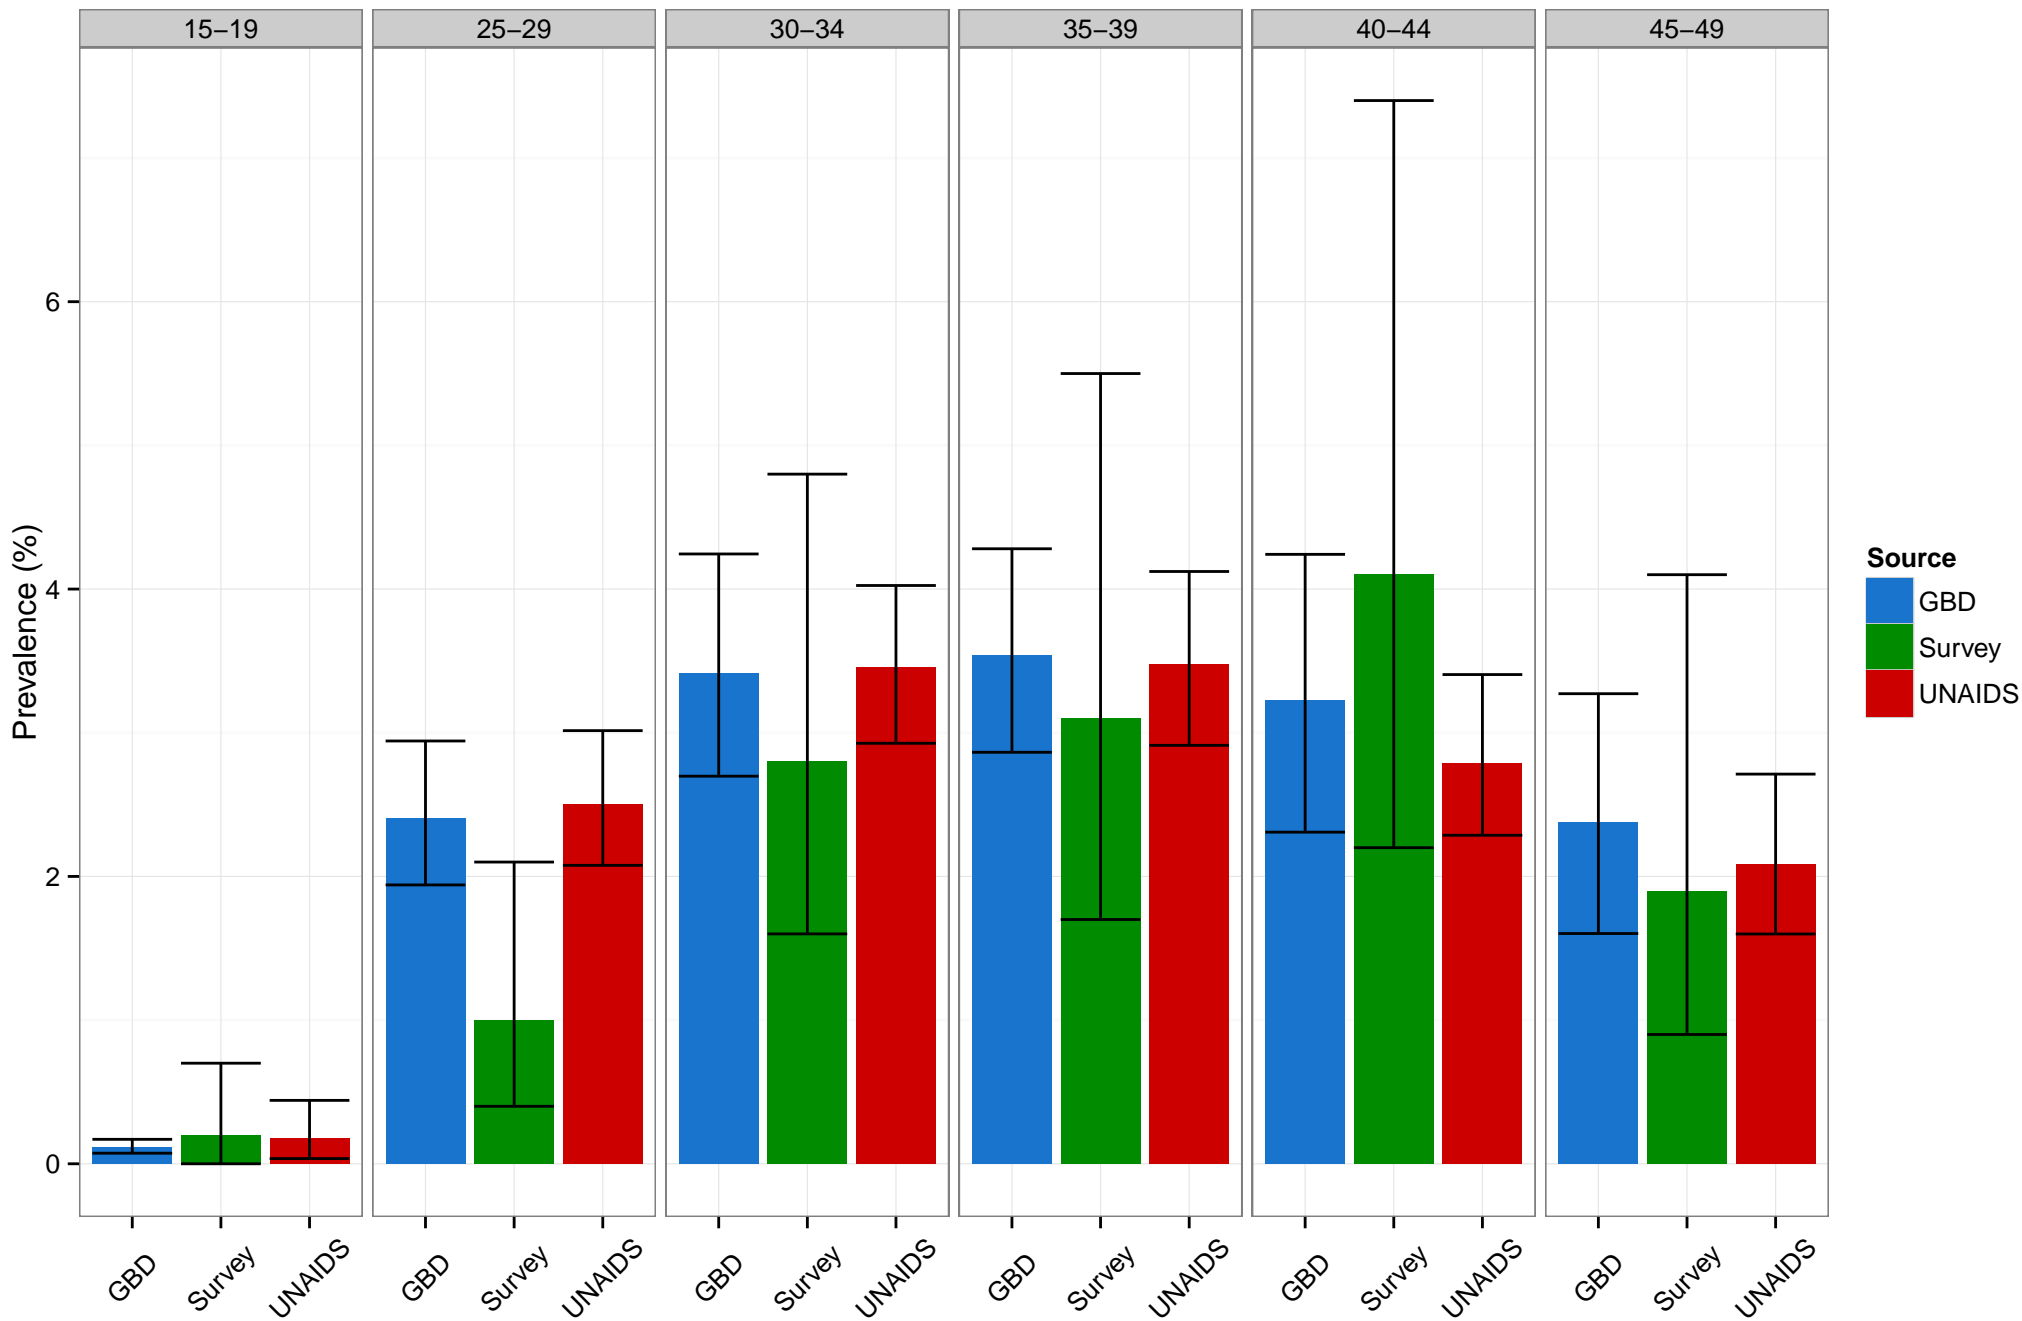

# HIV prevalence comparison to survey estimates by age-group with 95% confidence intervals

GHA 2003 Females

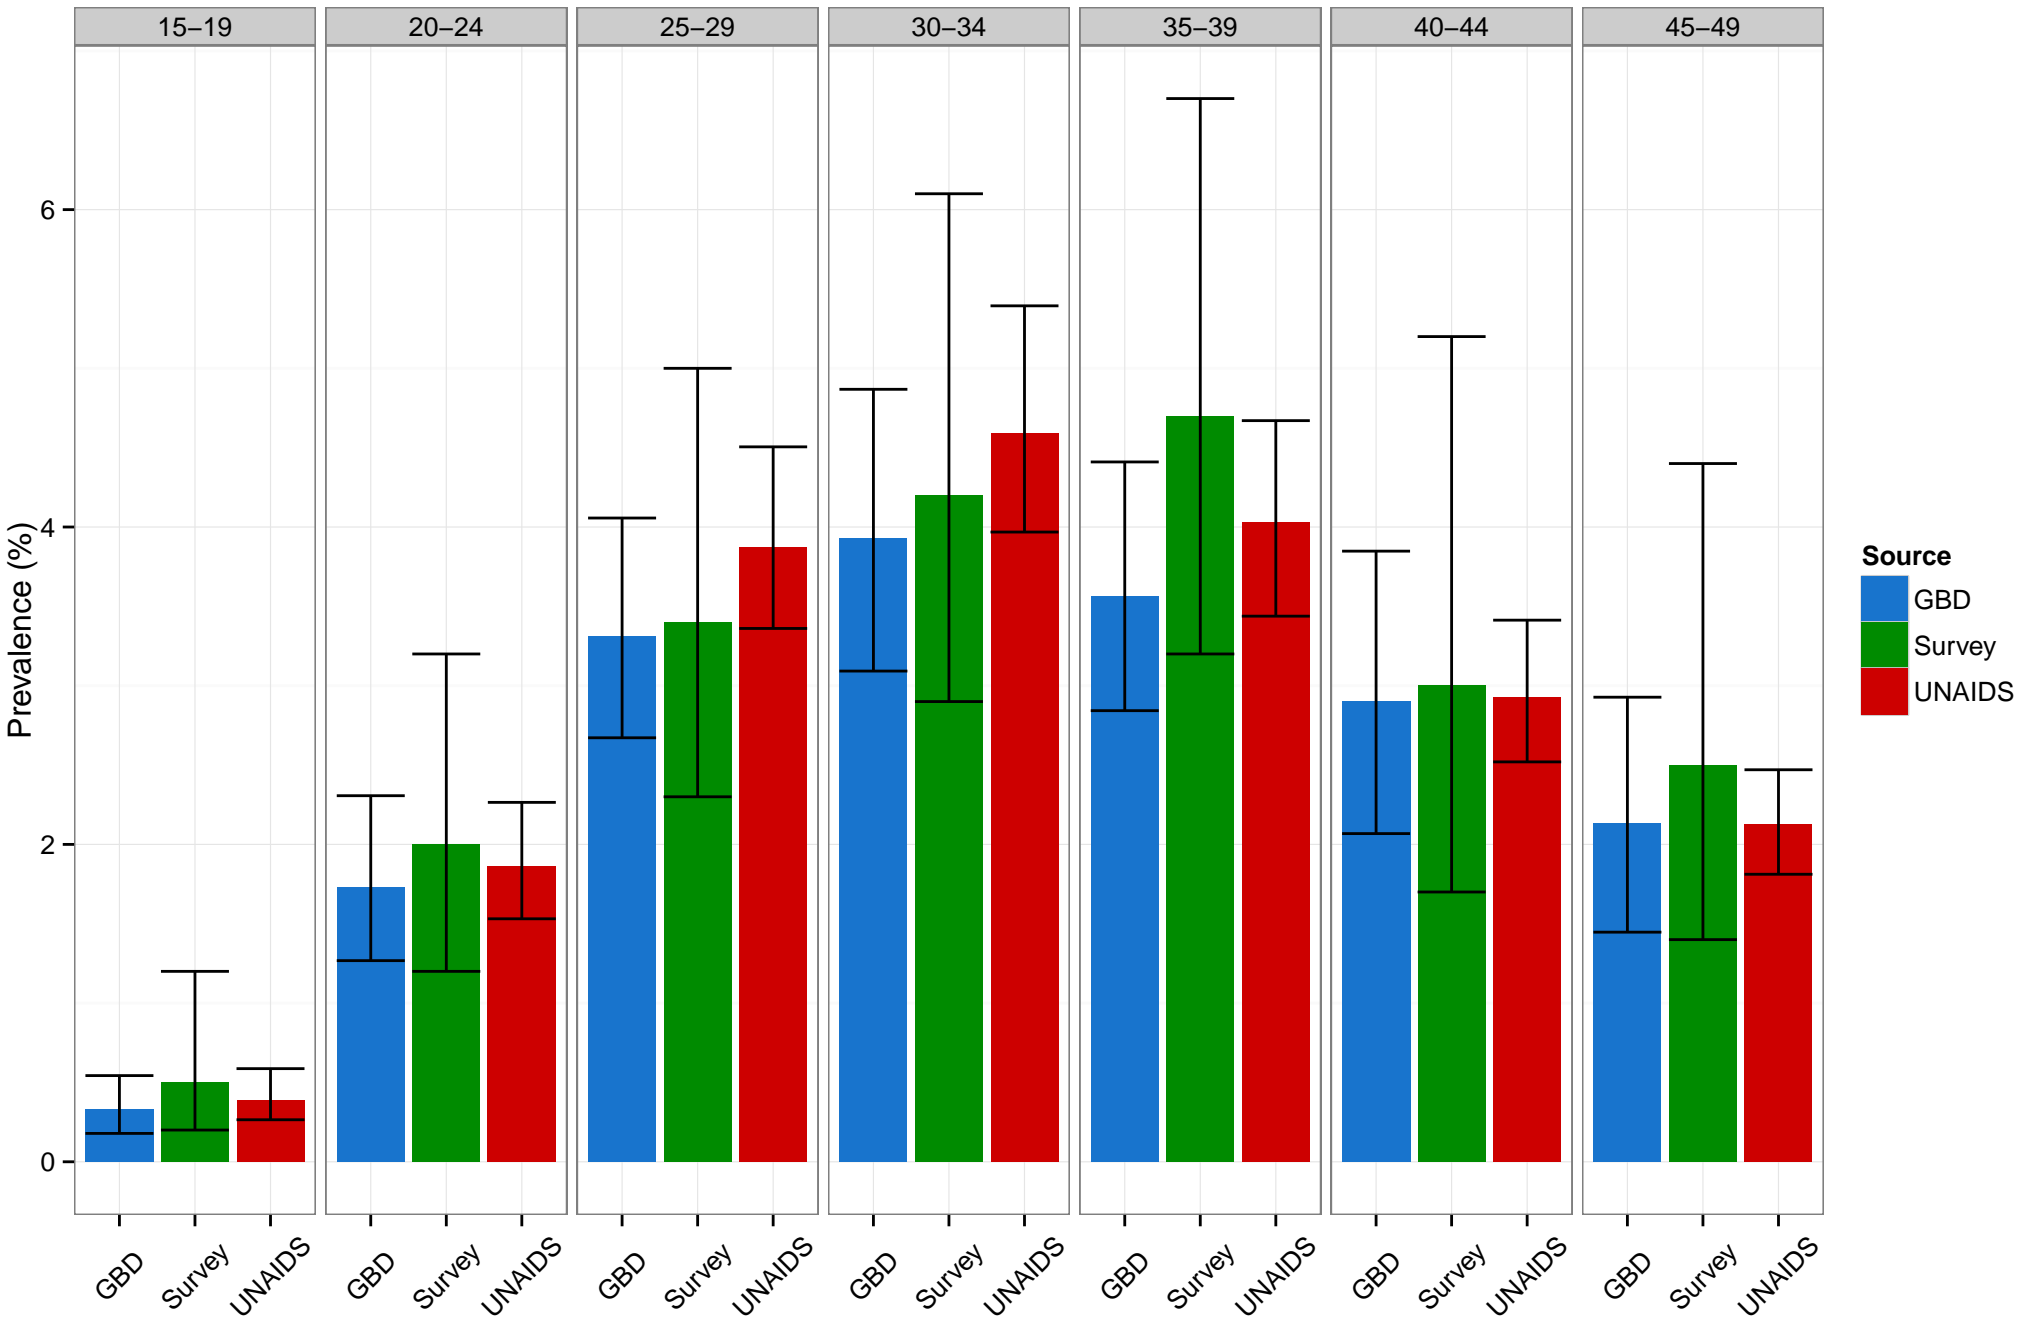

# HIV prevalence comparison to survey estimates by age-group with 95% confidence intervals

GIN 2005 Males

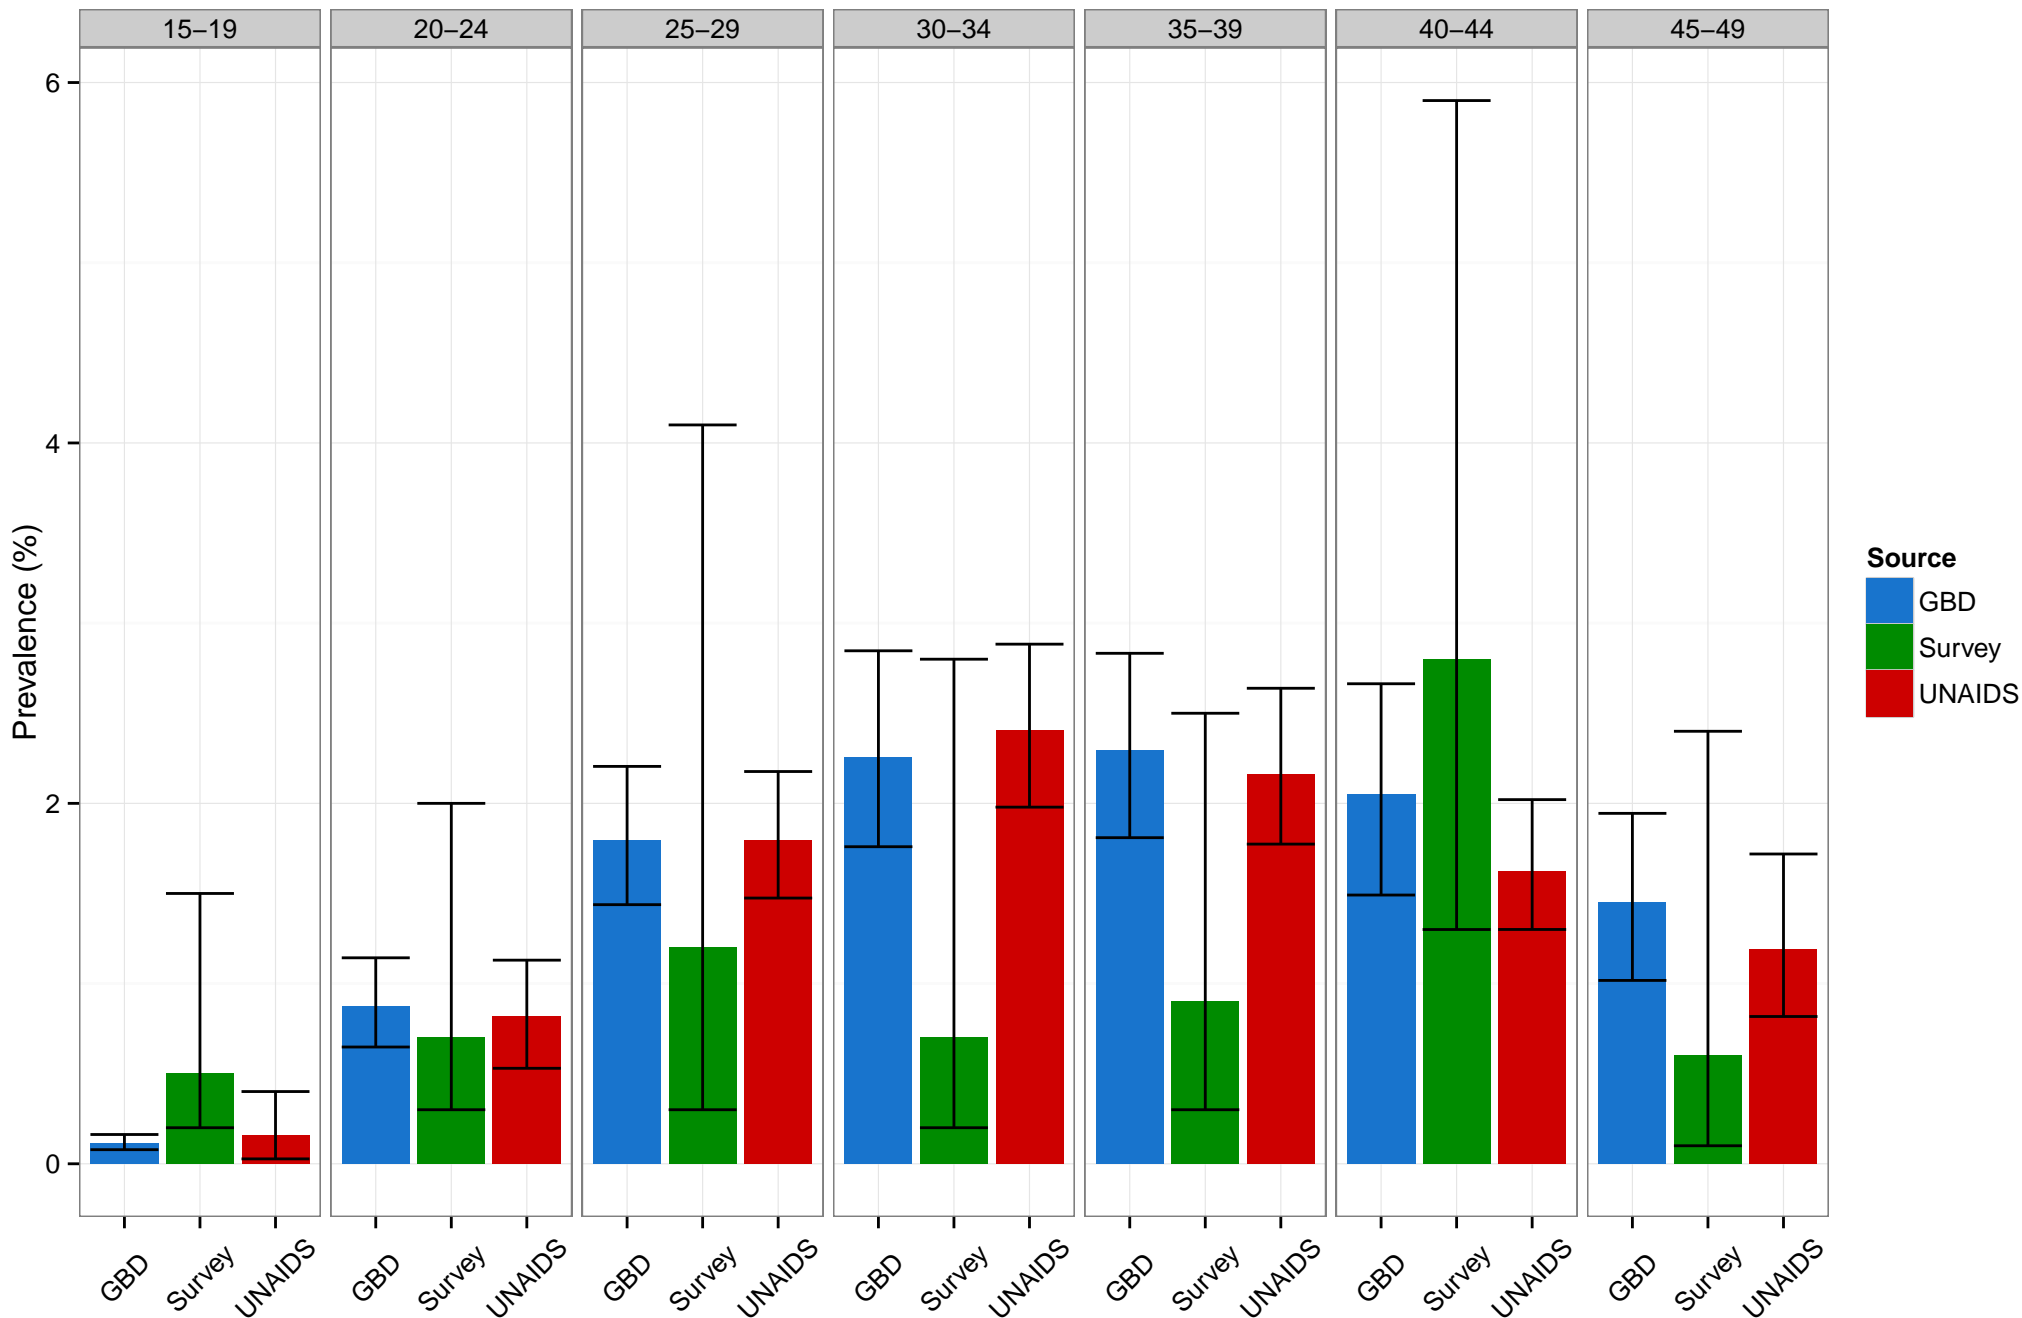

# HIV prevalence comparison to survey estimates by age-group with 95% confidence intervals

GIN 2005 Females

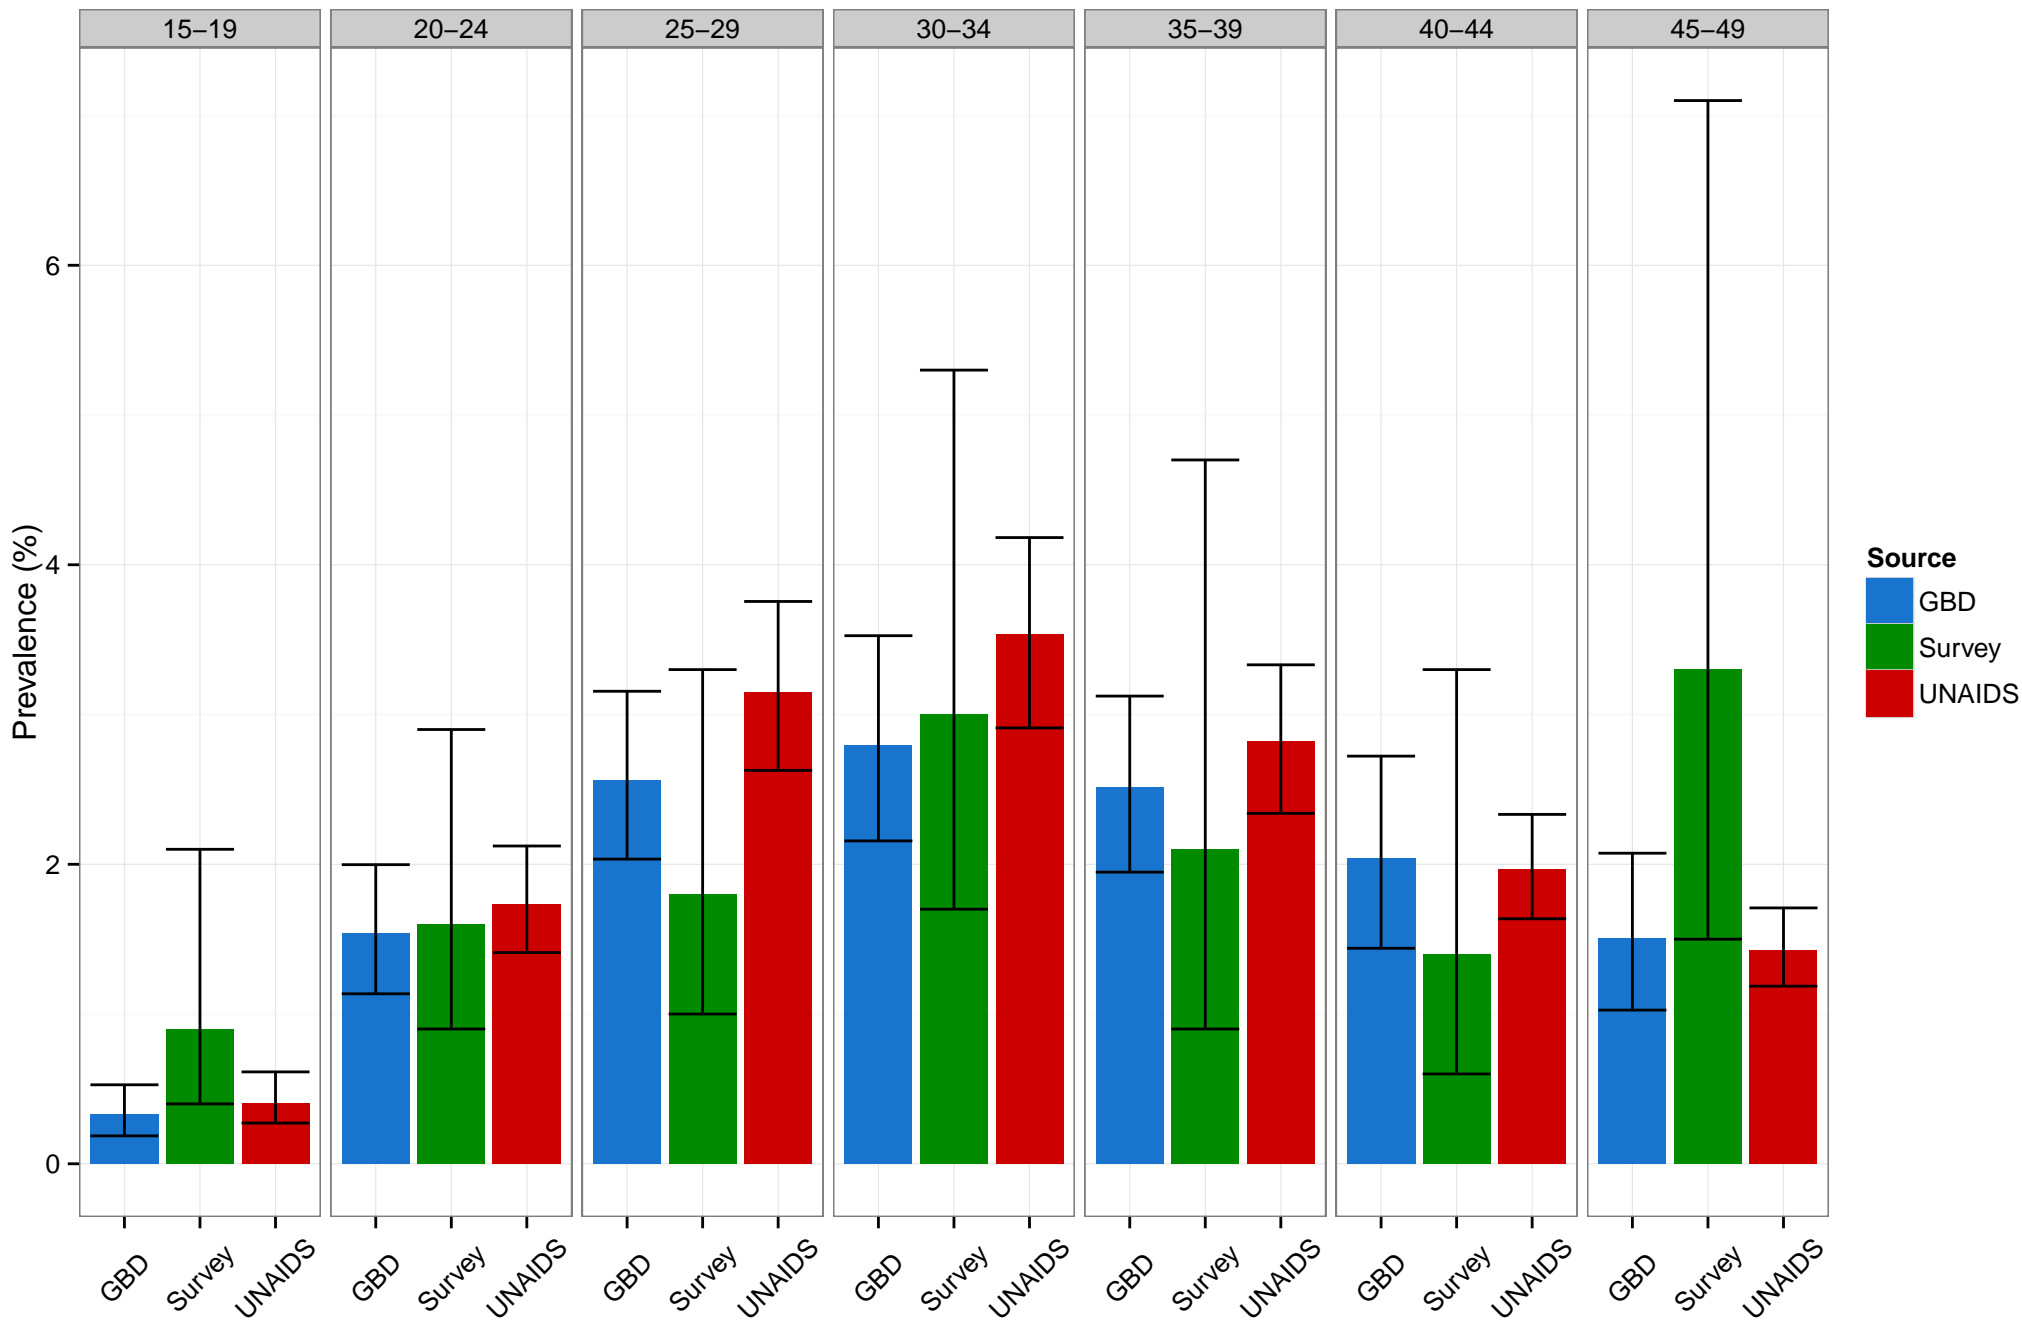

# HIV prevalence comparison to survey estimates by age-group with 95% confidence intervals

GIN 2012 Males

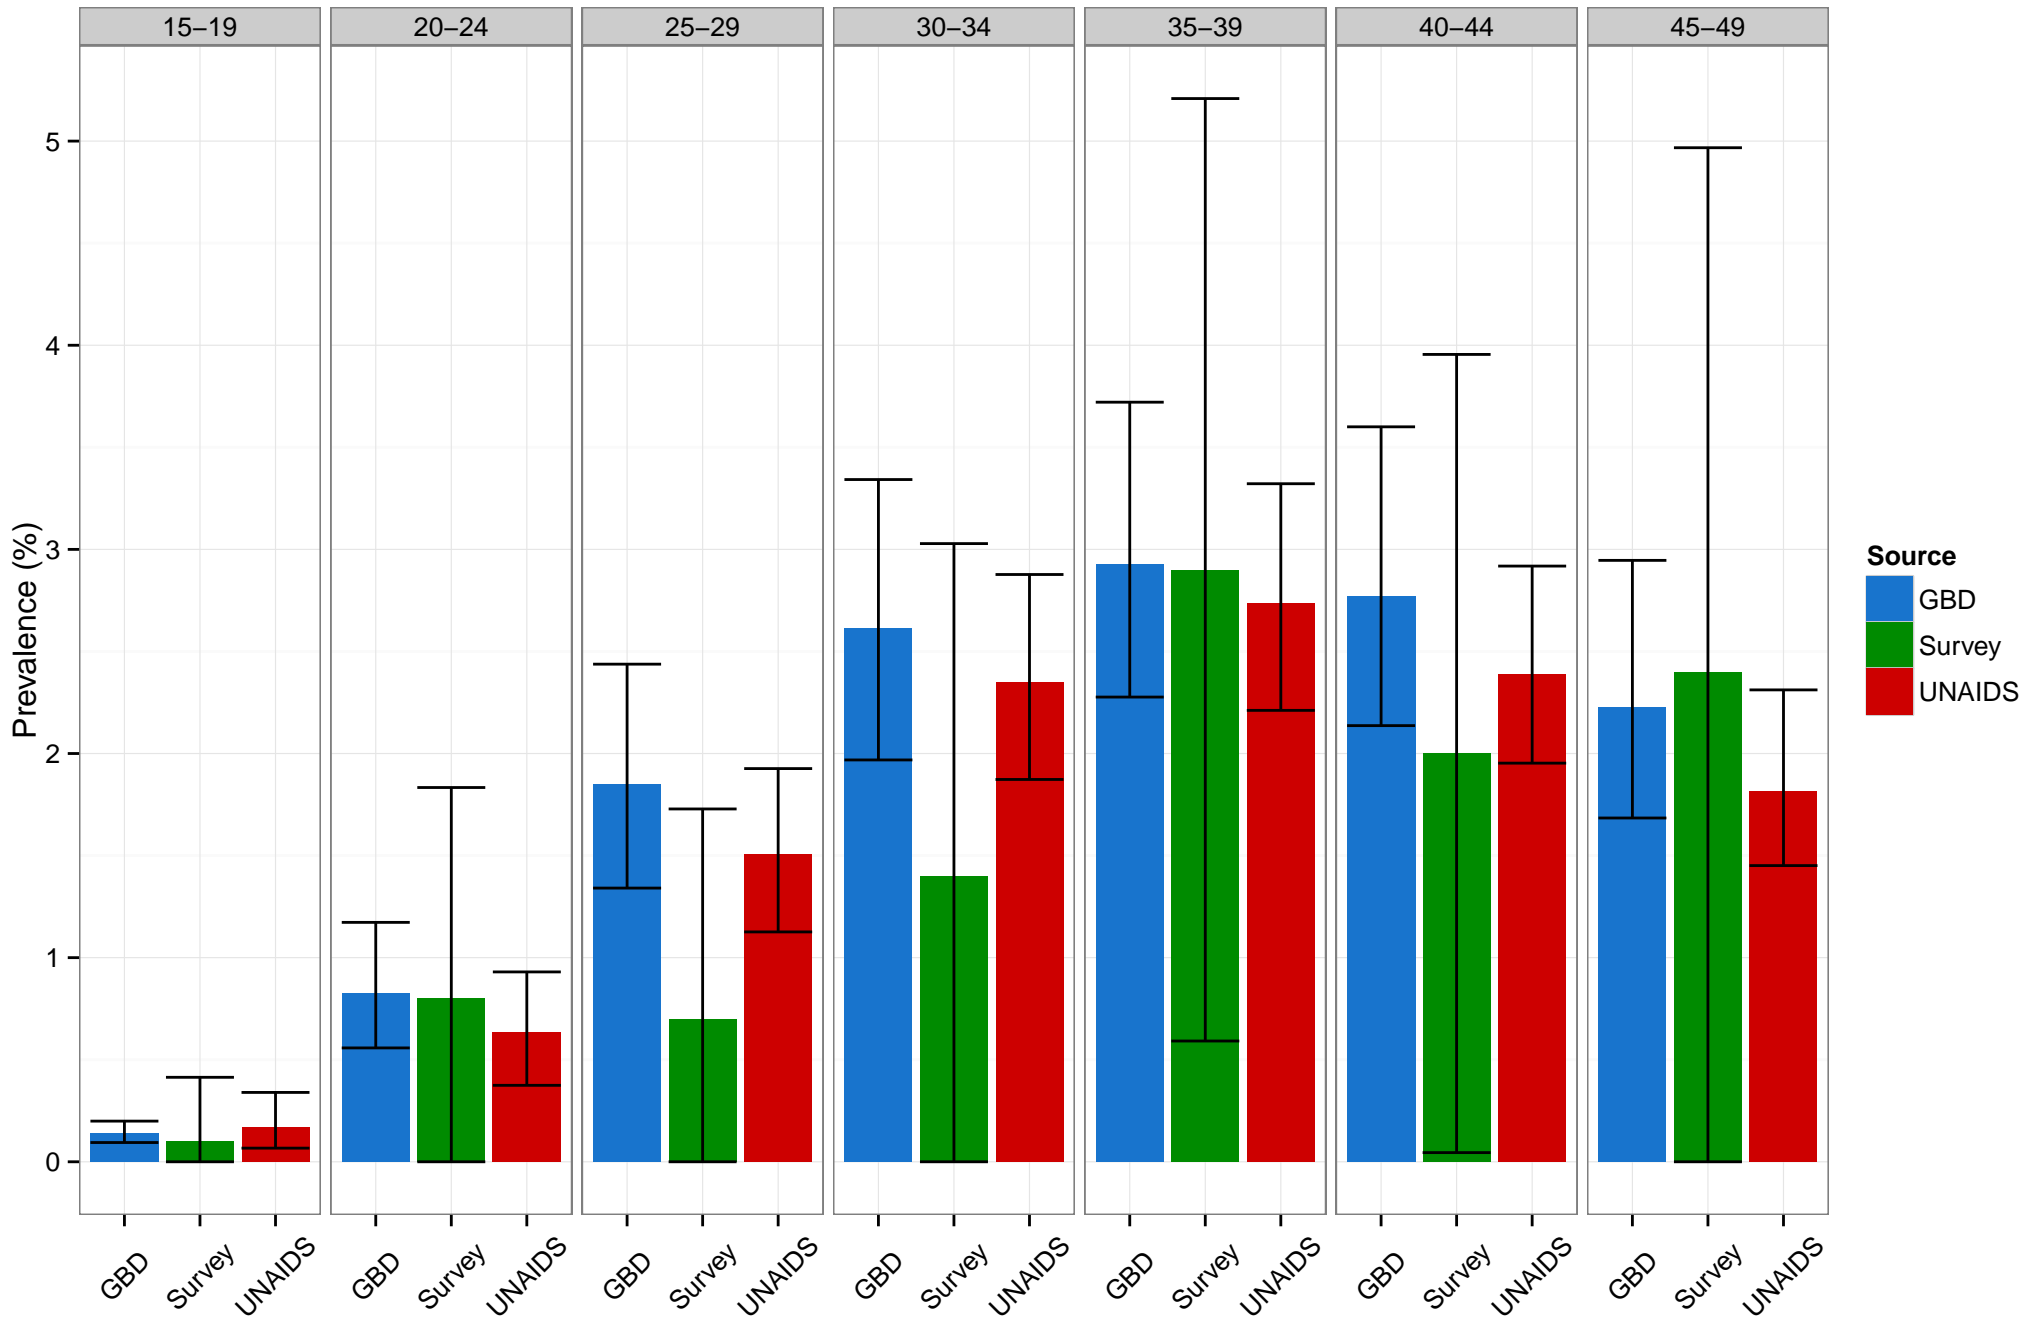

# HIV prevalence comparison to survey estimates by age-group with 95% confidence intervals

GIN 2012 Females

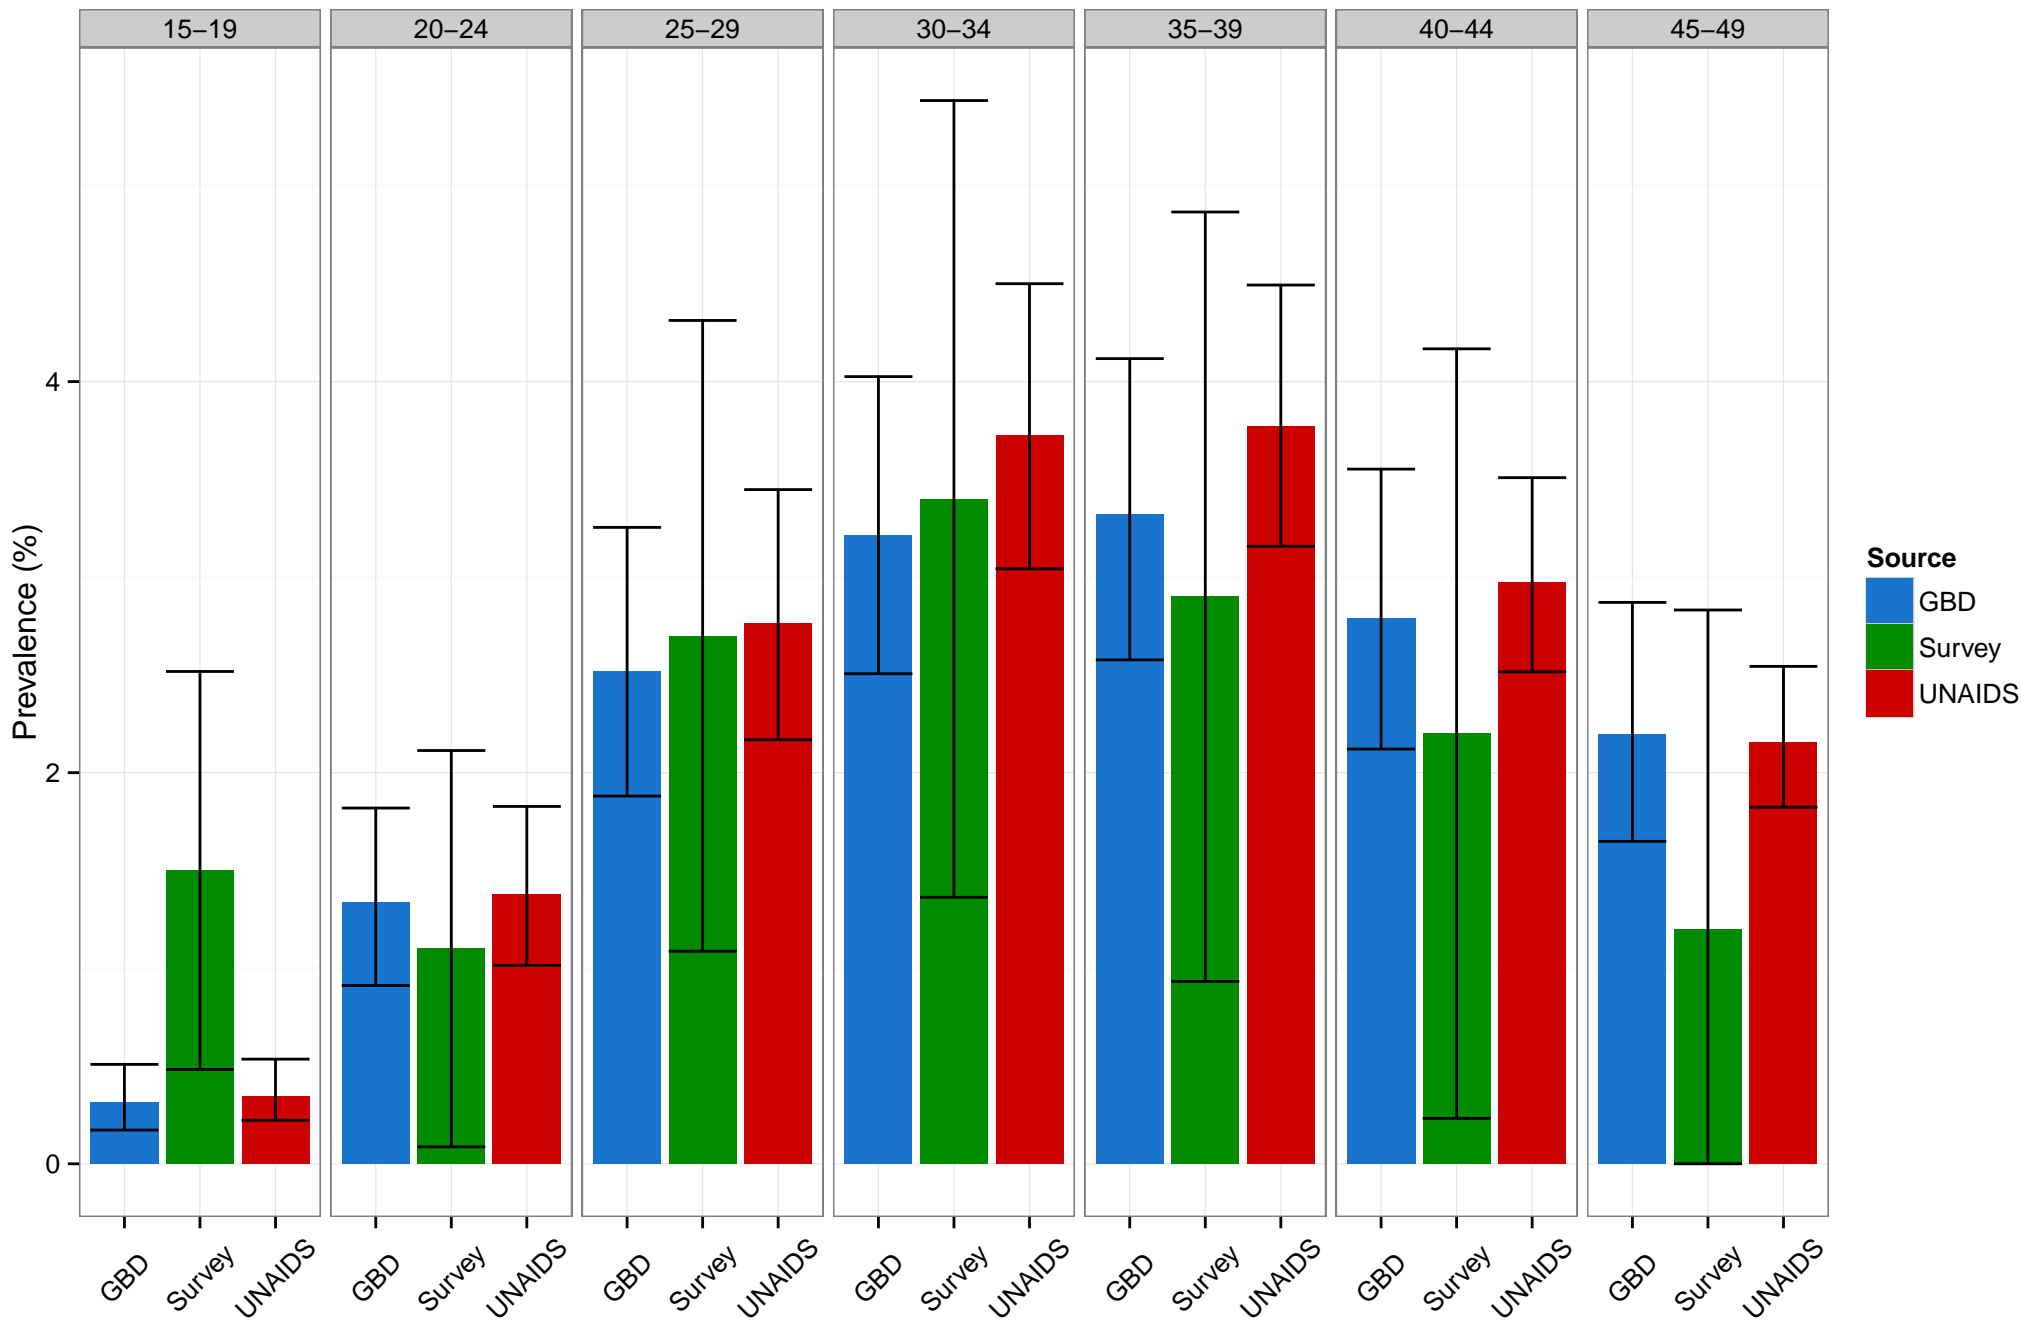



# HIV prevalence comparison to survey estimates by age-group with 95% confidence intervals

GNQ 2011 Males

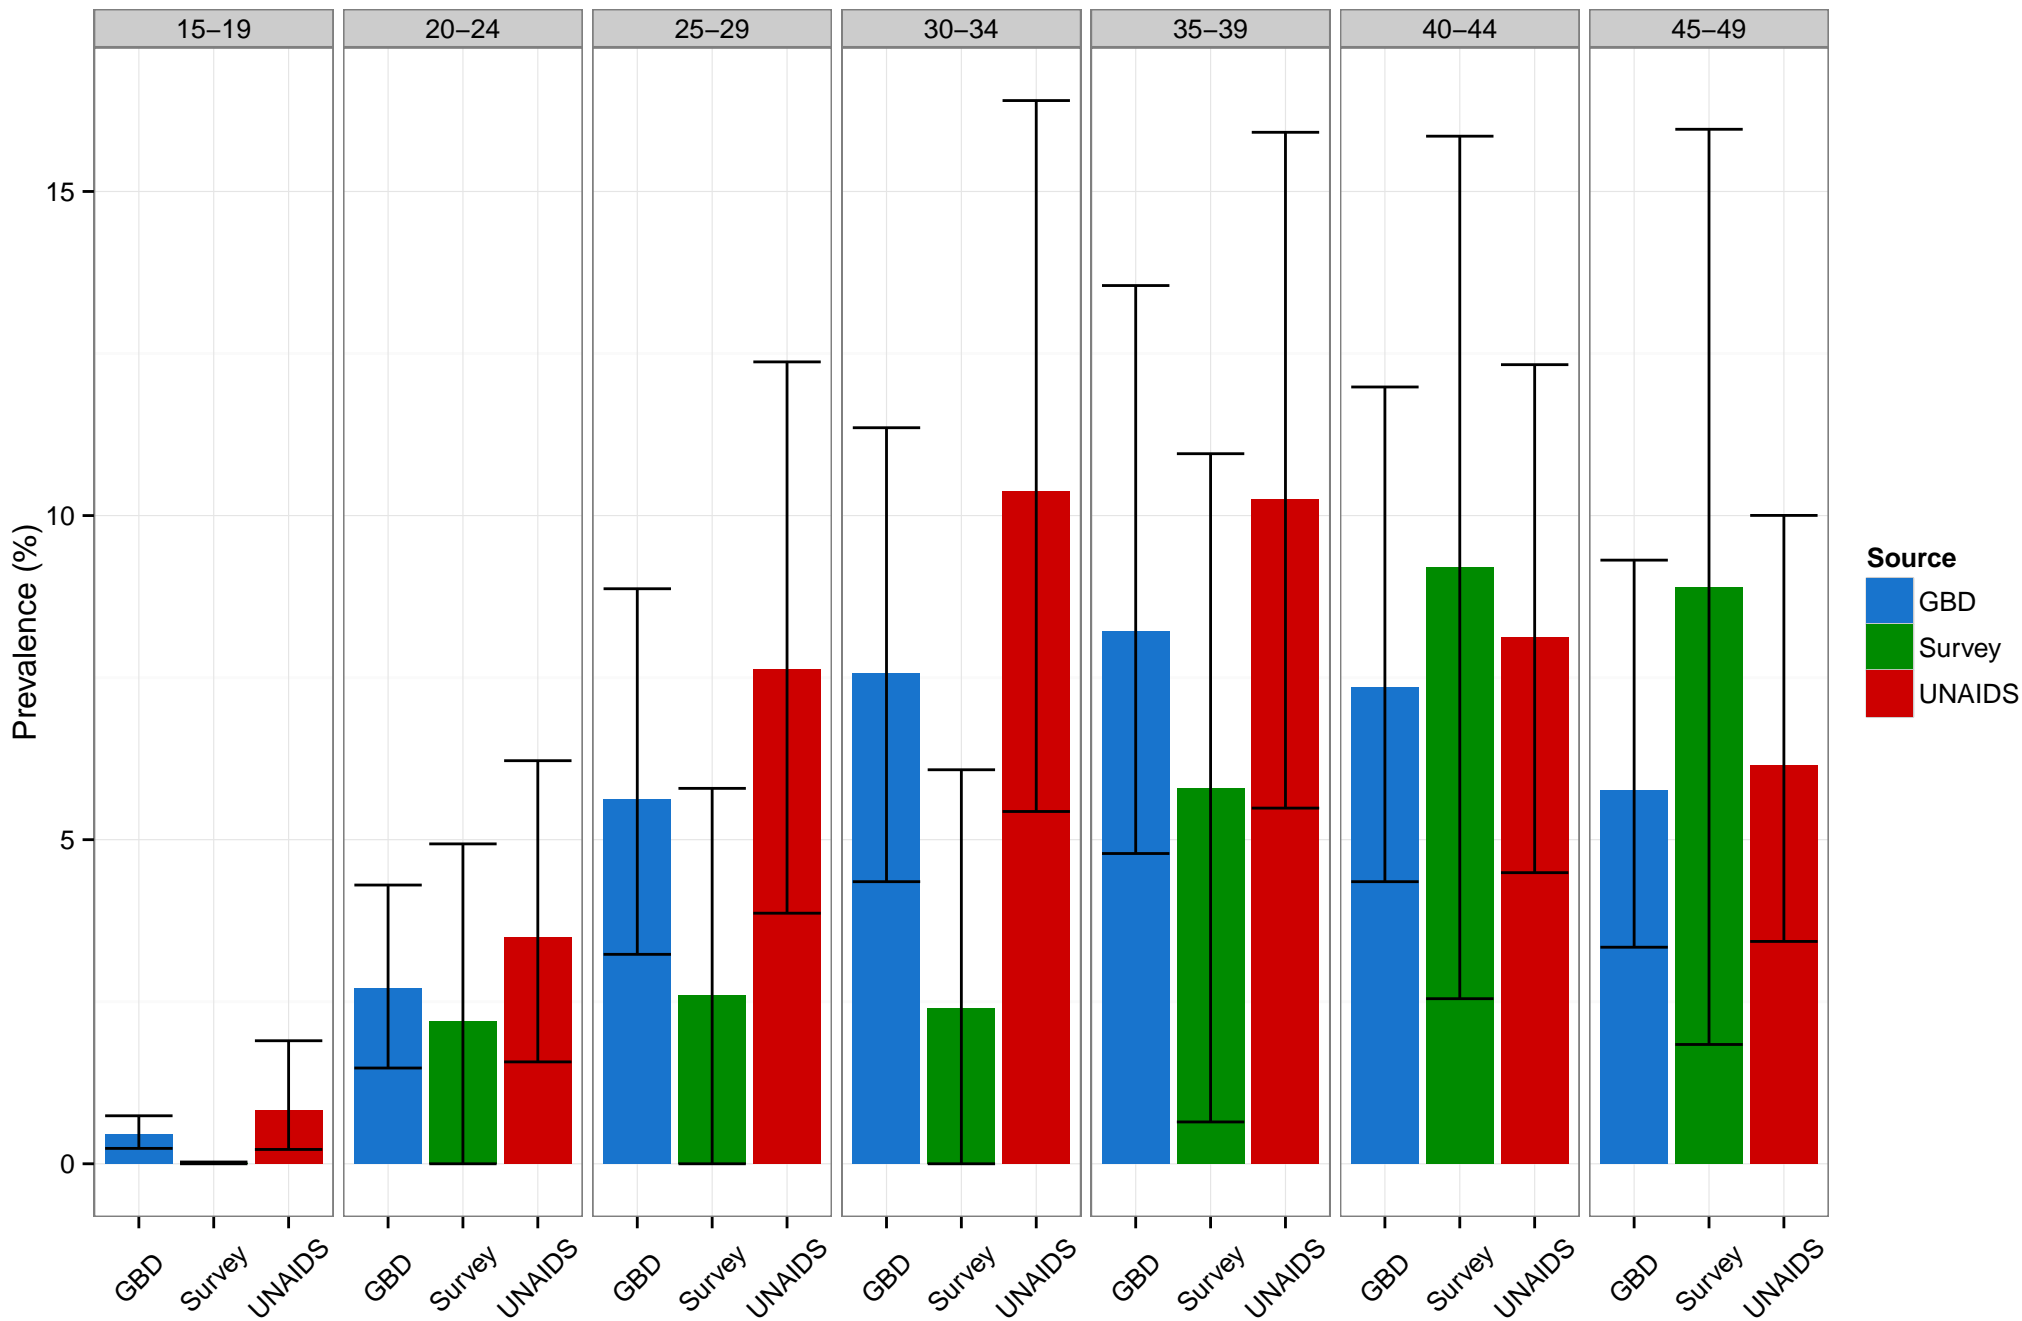

# HIV prevalence comparison to survey estimates by age-group with 95% confidence intervals

GNQ 2011 Females

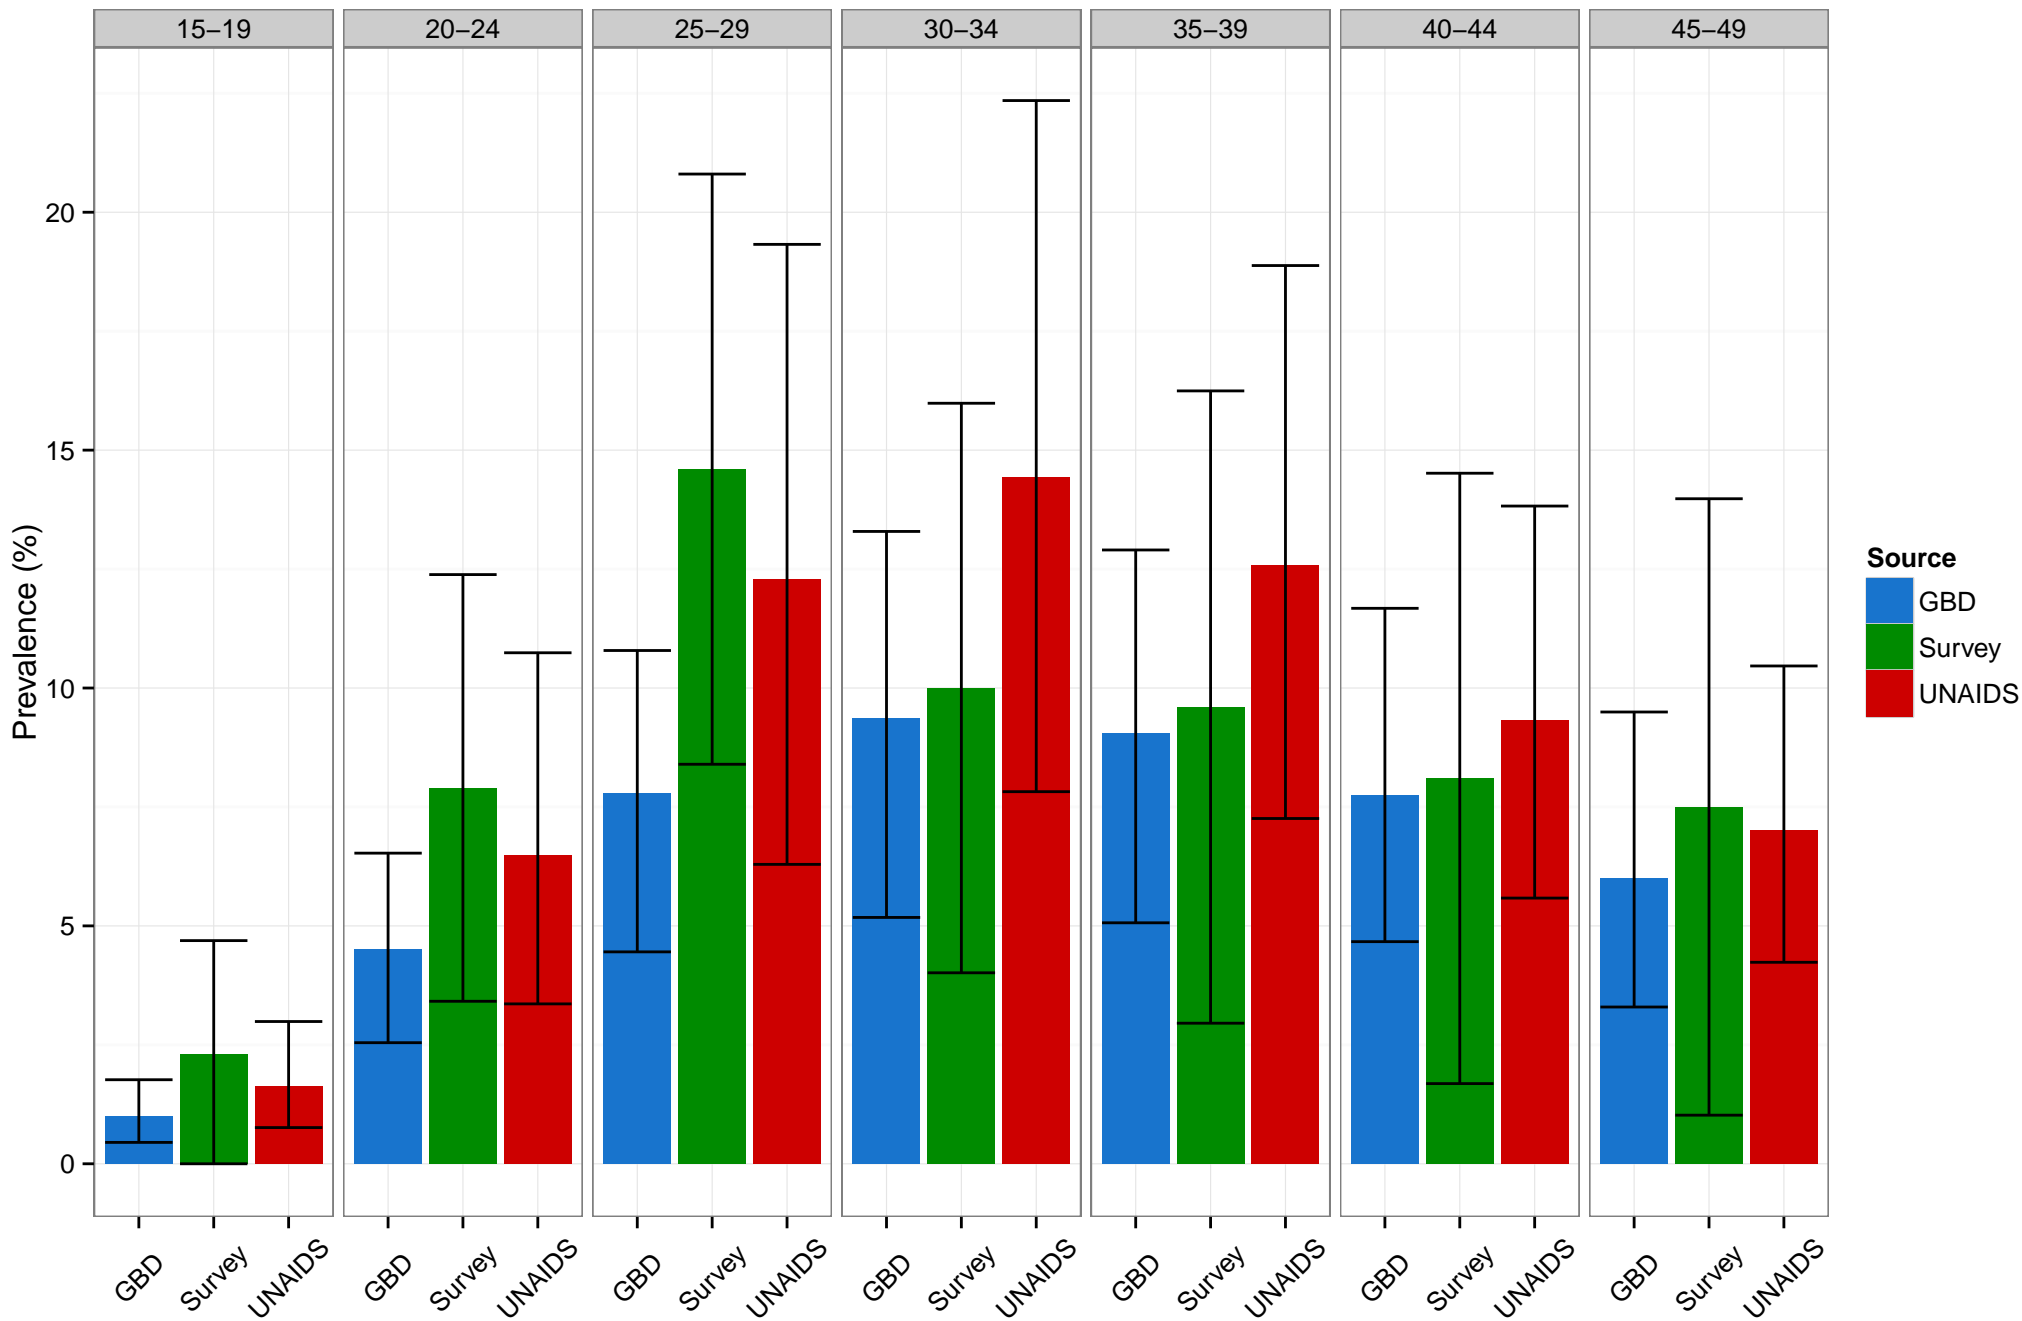

# HIV prevalence comparison to survey estimates by age-group with 95% confidence intervals

HTI 2005–2006 Males

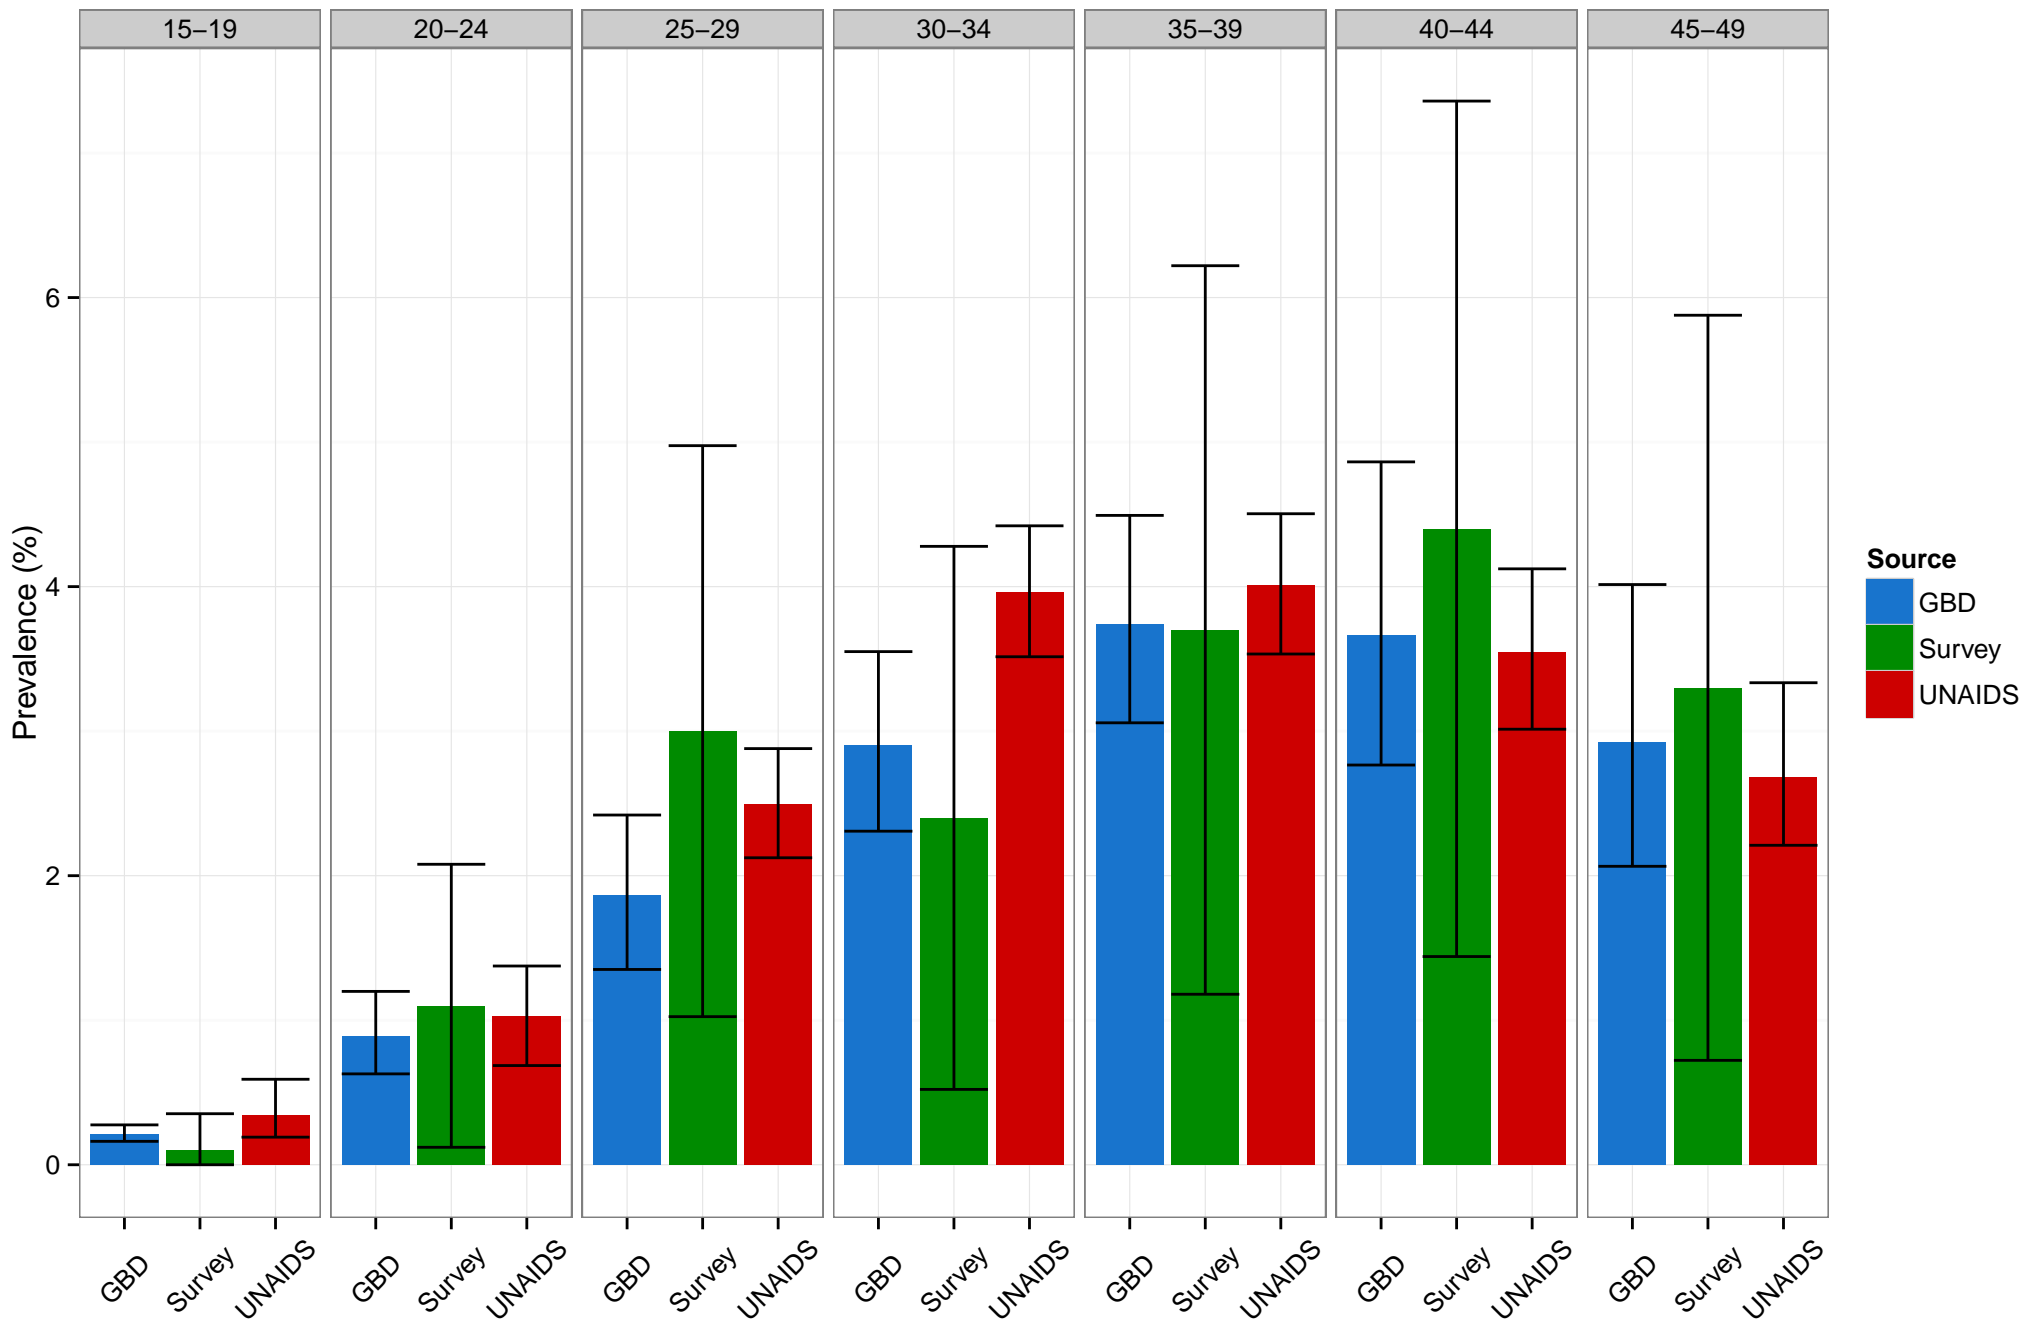

# HIV prevalence comparison to survey estimates by age-group with 95% confidence intervals

HTI 2005–2006 Females

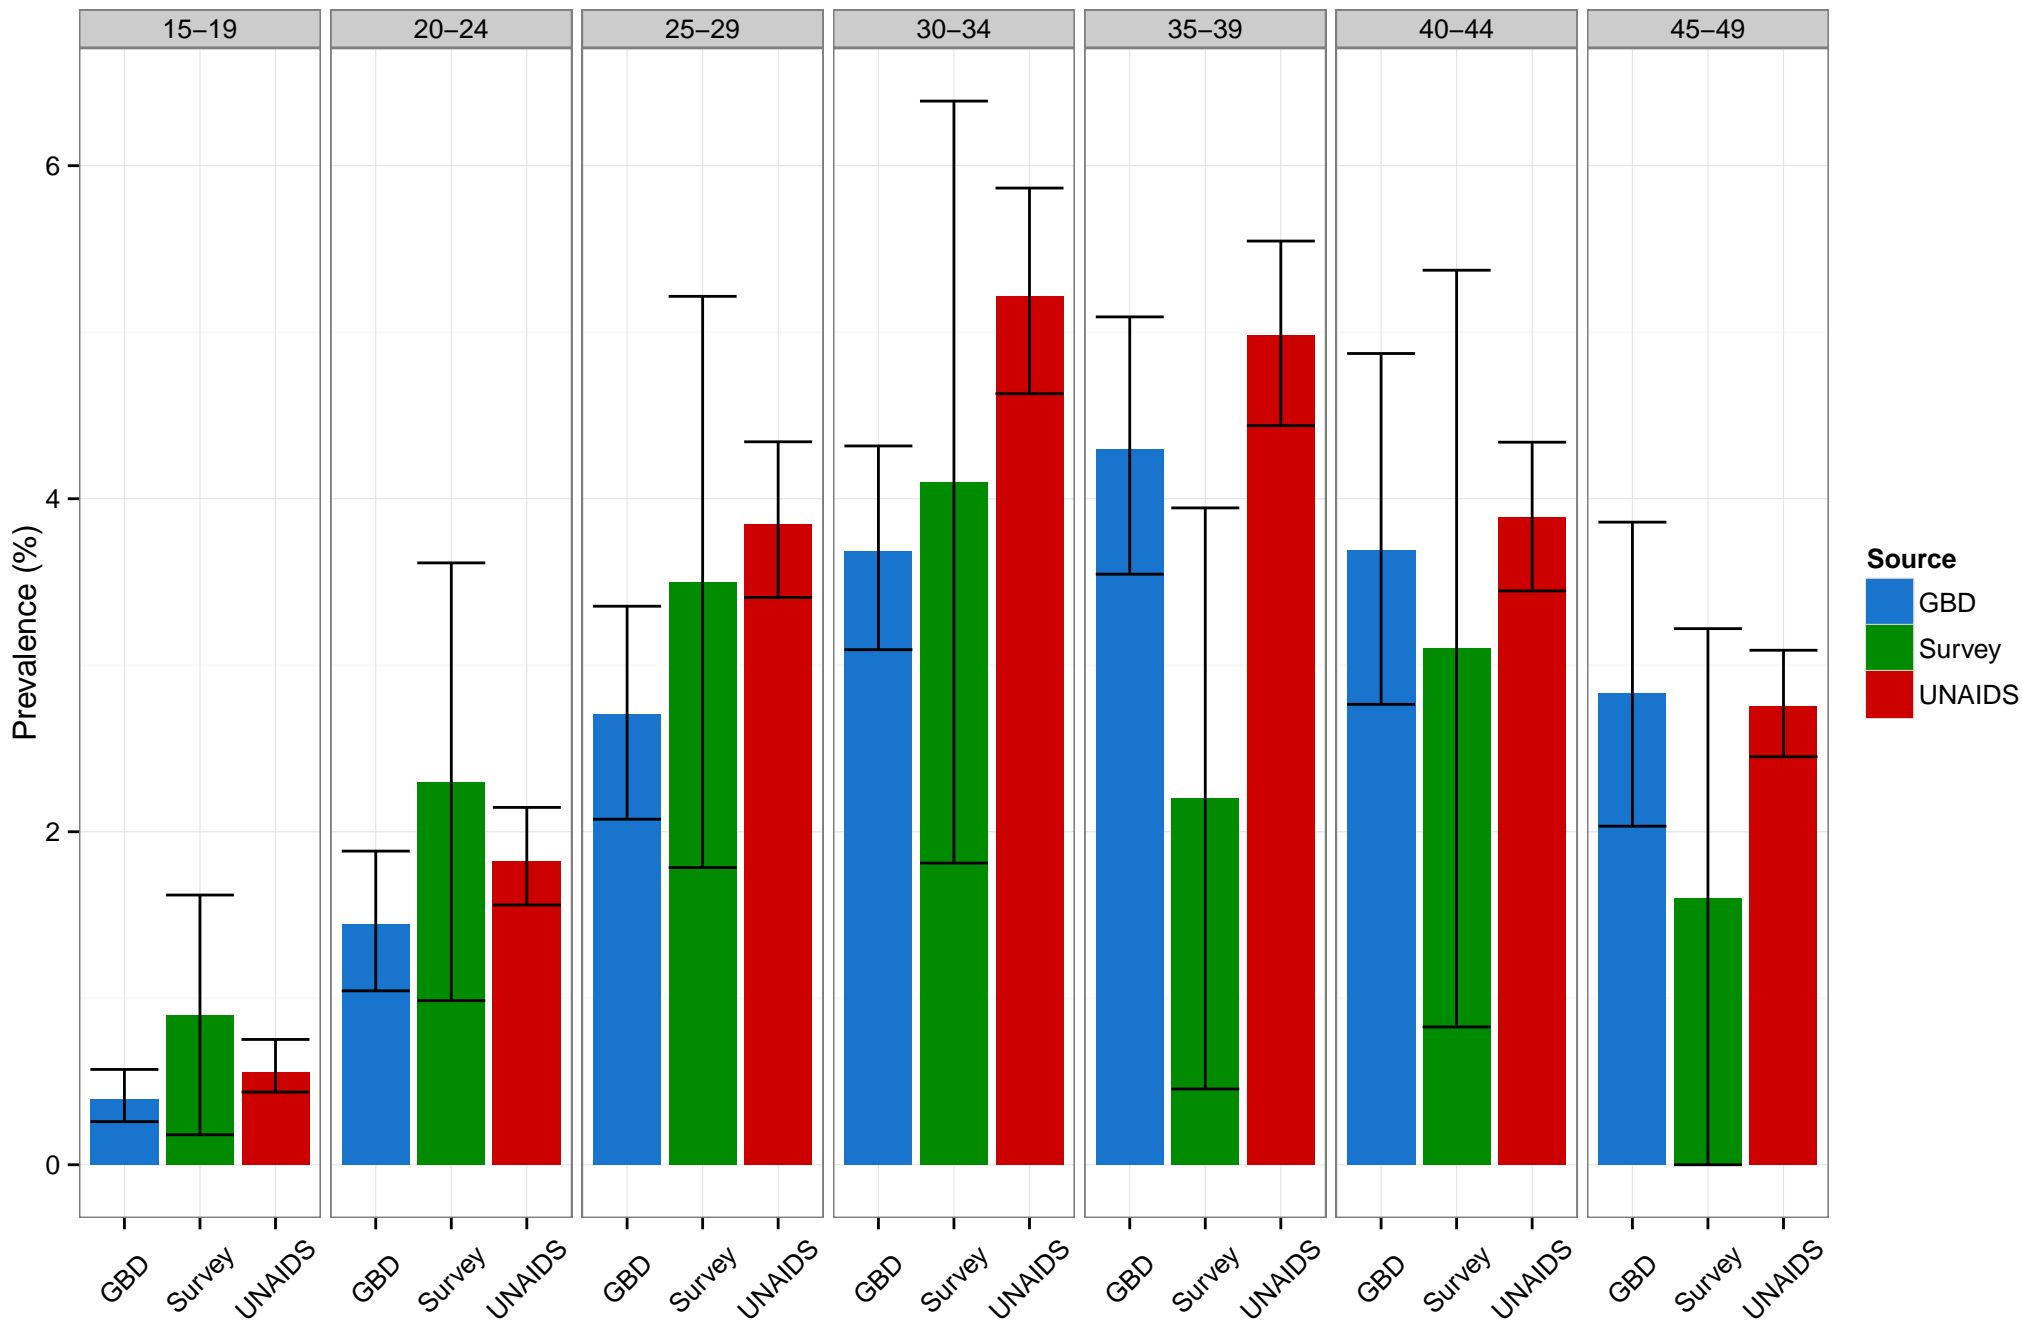

# HIV prevalence comparison to survey estimates by age-group with 95% confidence intervals

HTI 2012 Males

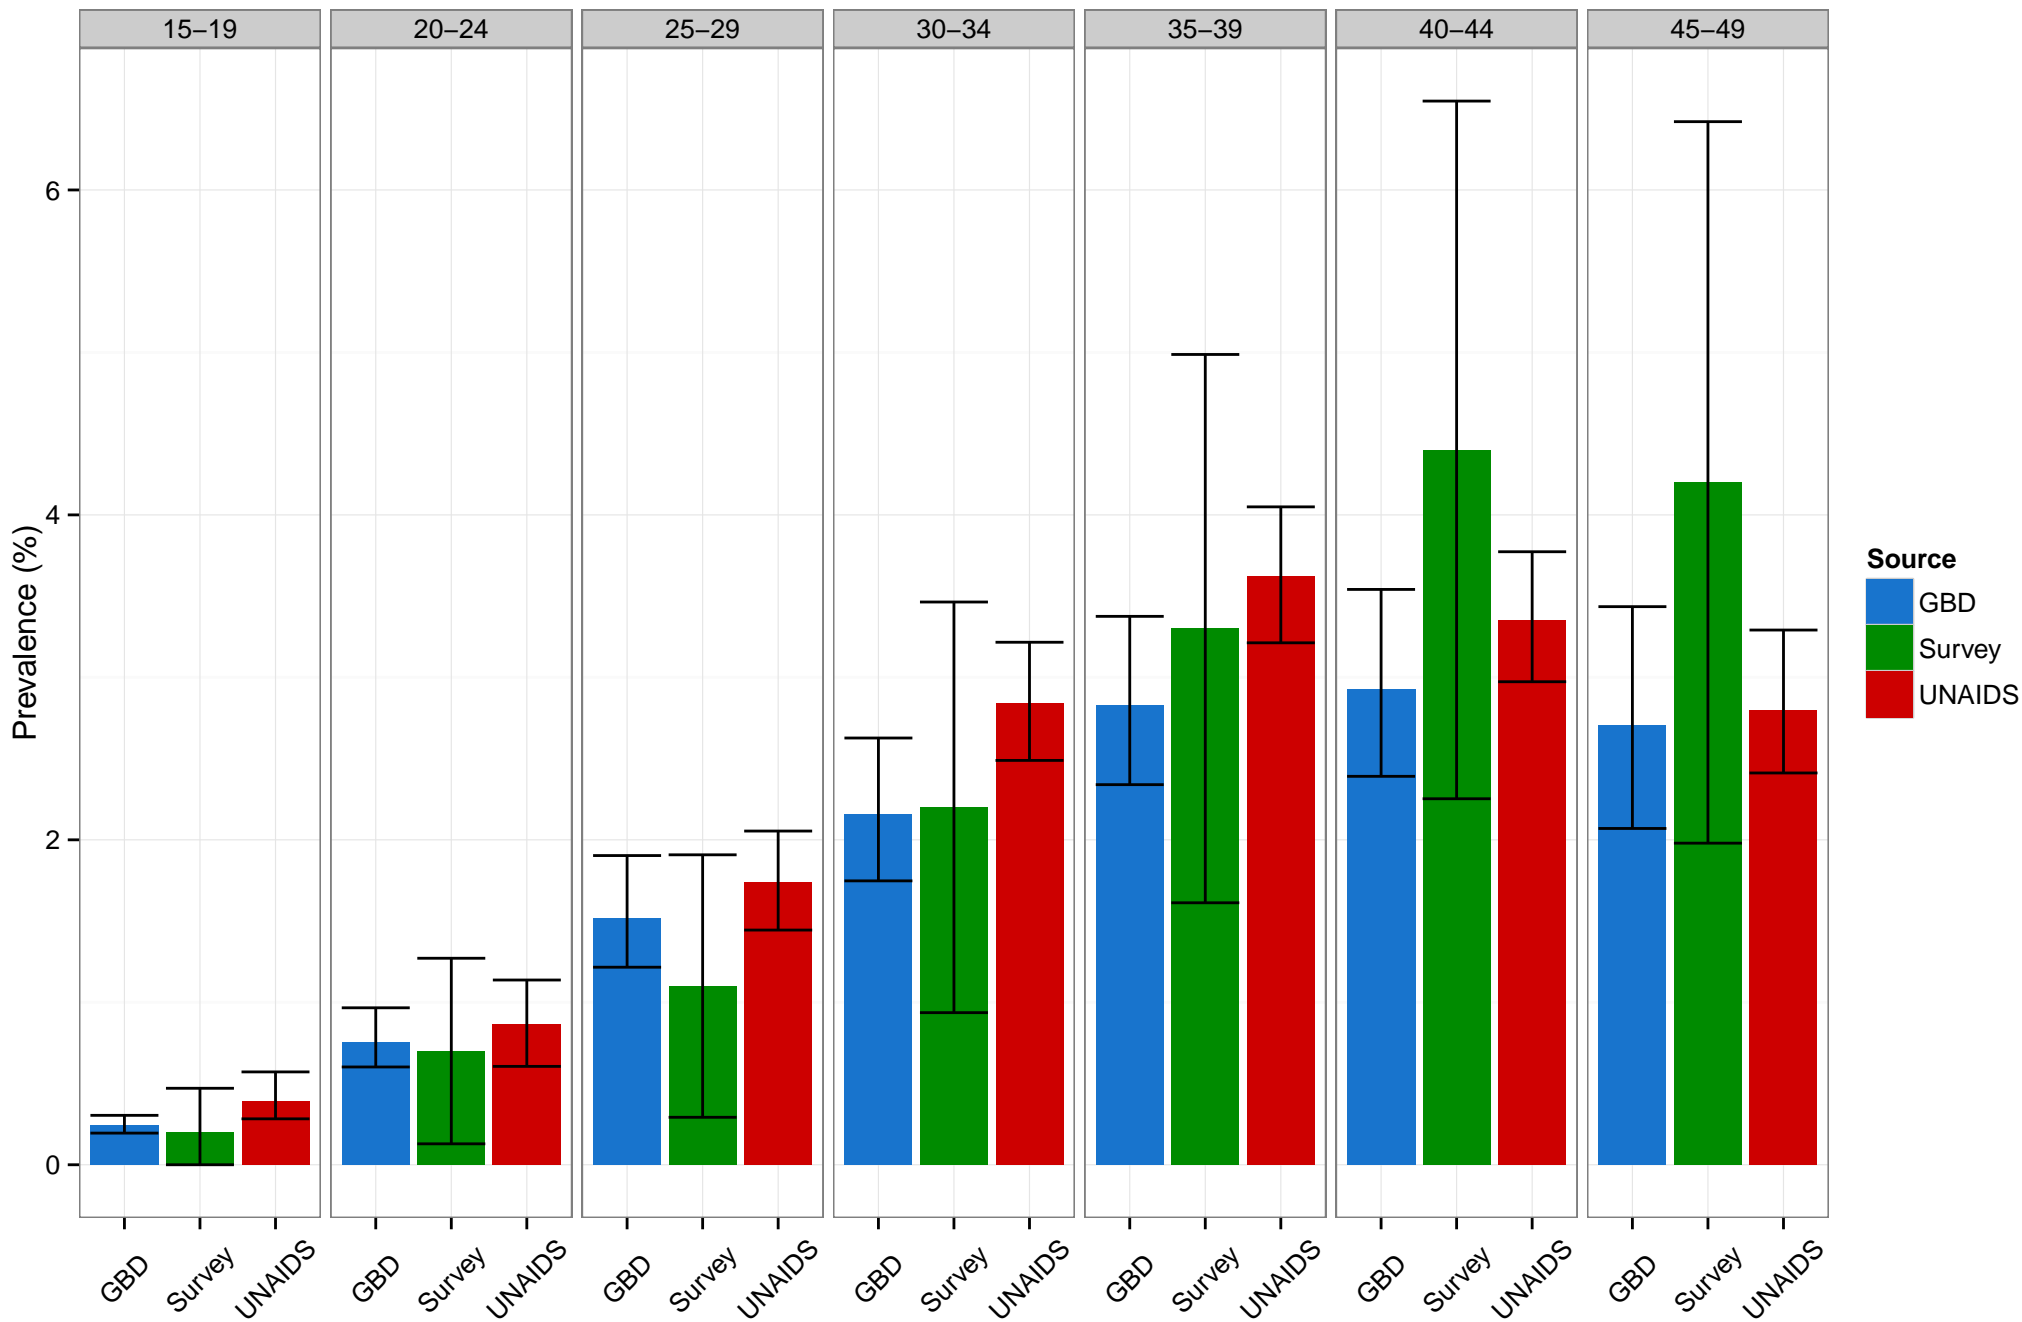

# HIV prevalence comparison to survey estimates by age-group with 95% confidence intervals

HTI 2012 Females

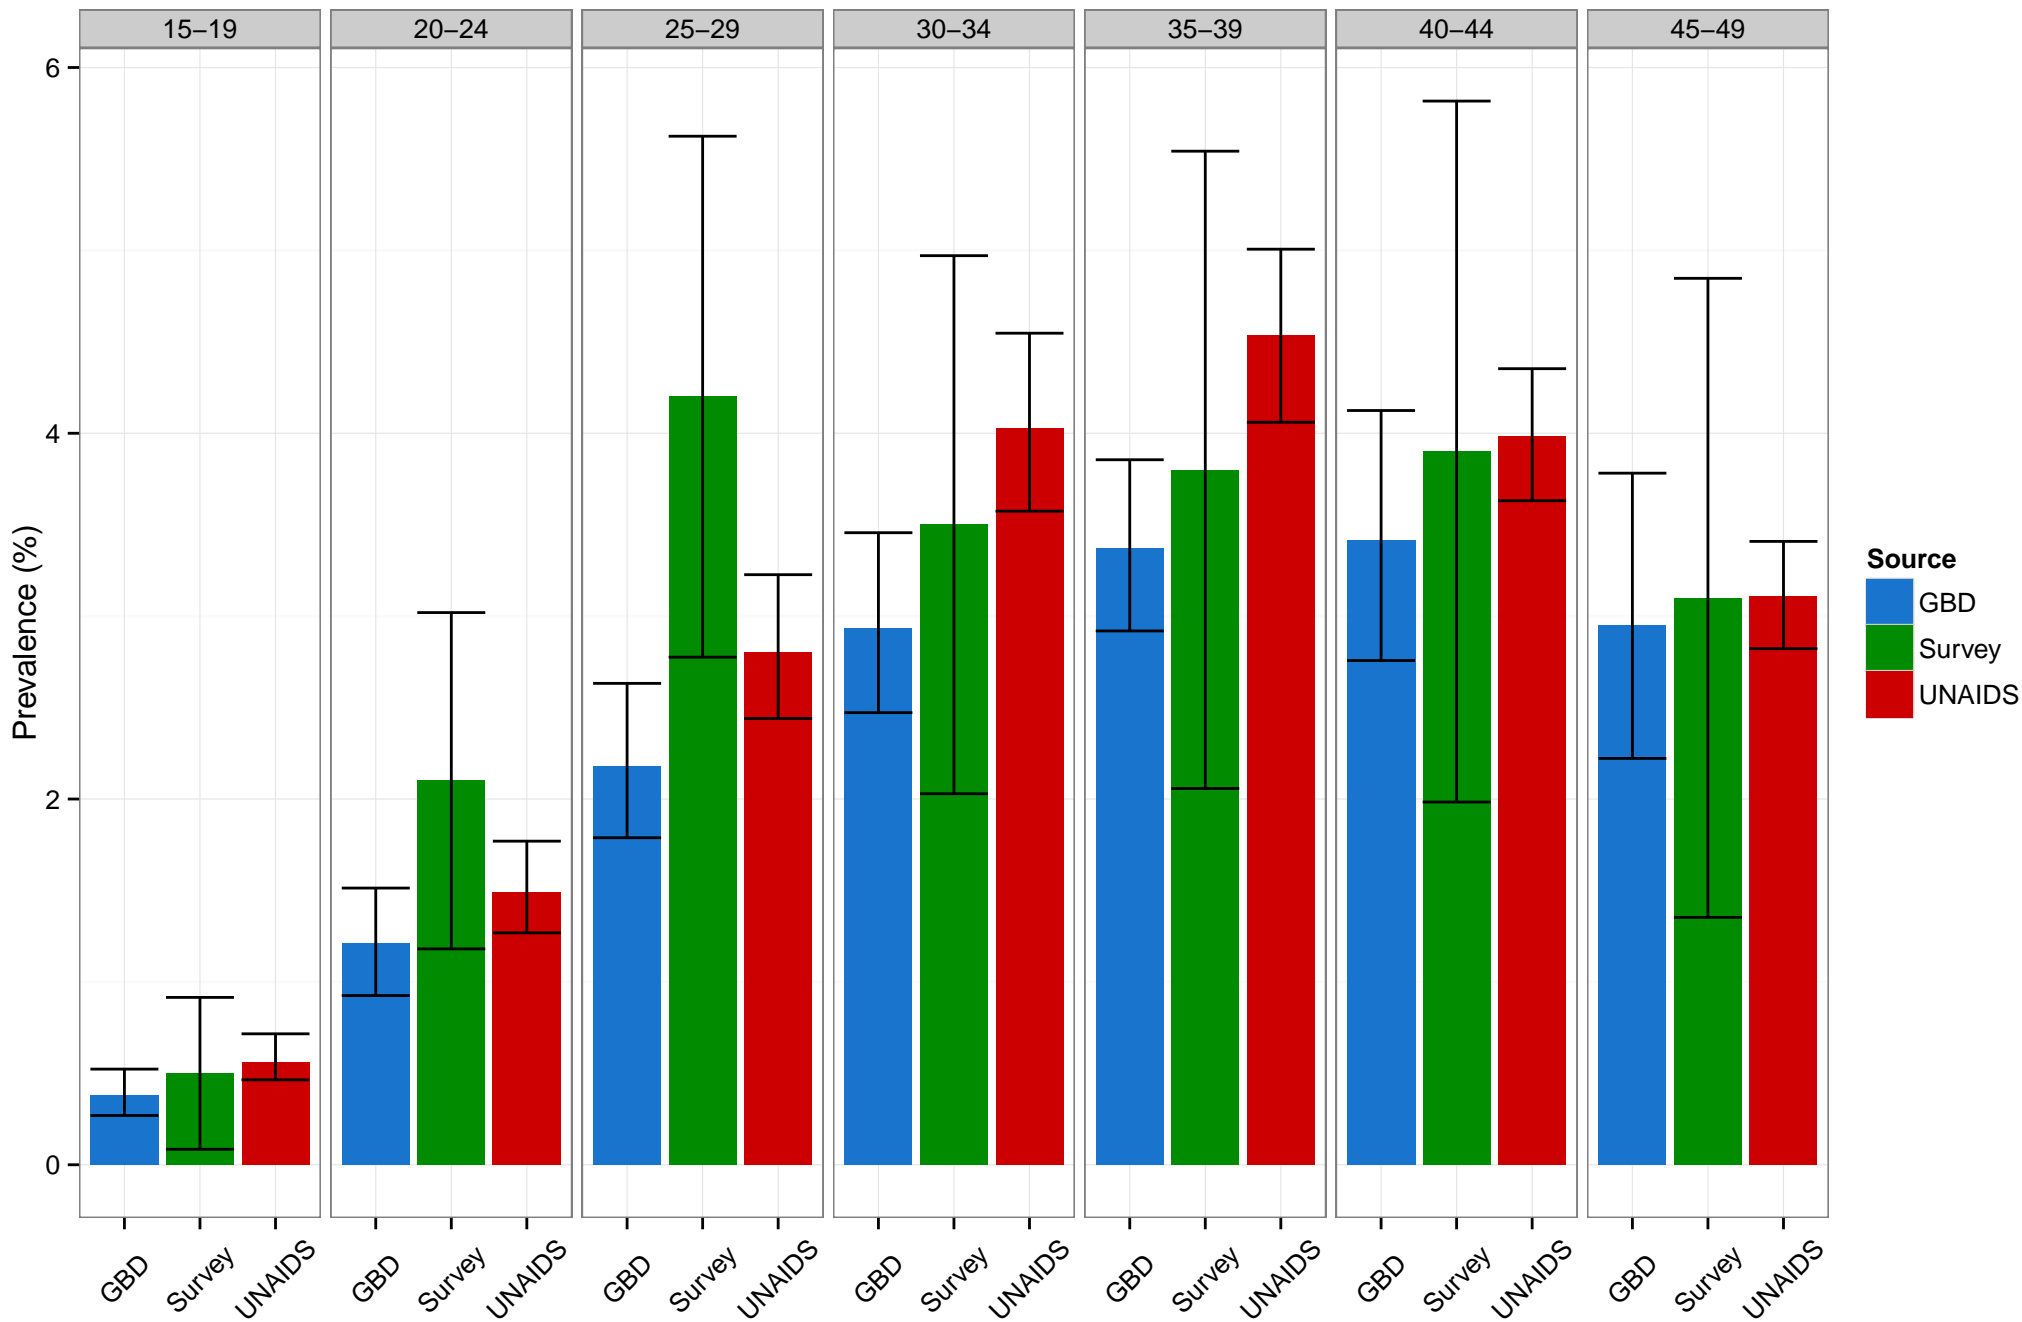

# HIV prevalence comparison to survey estimates by age-group with 95% confidence intervals

IND 2005–2006 Males

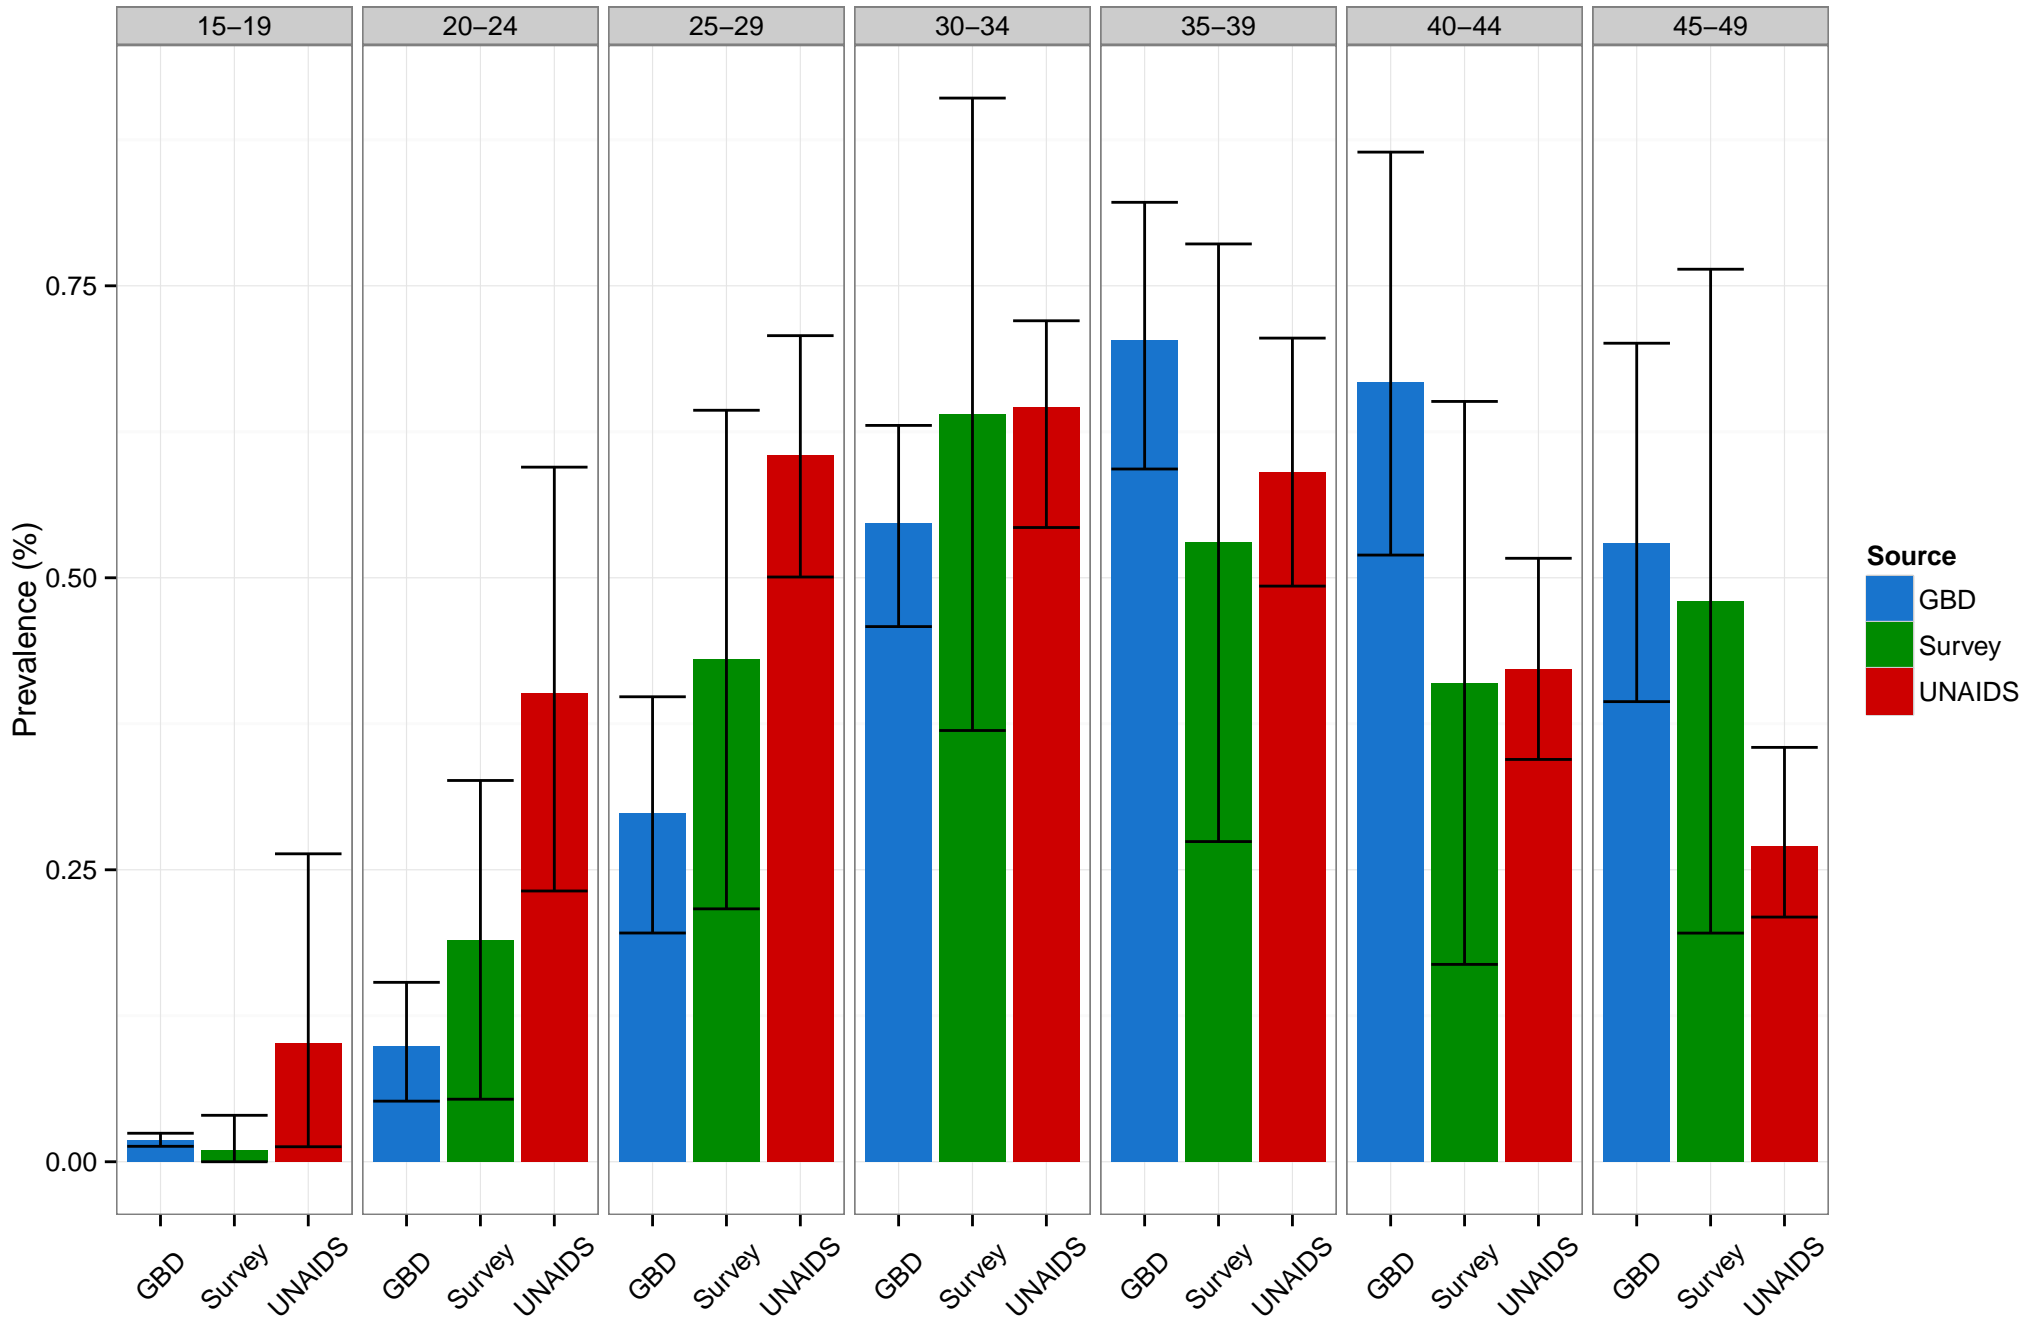

# HIV prevalence comparison to survey estimates by age-group with 95% confidence intervals

IND 2005–2006 Females

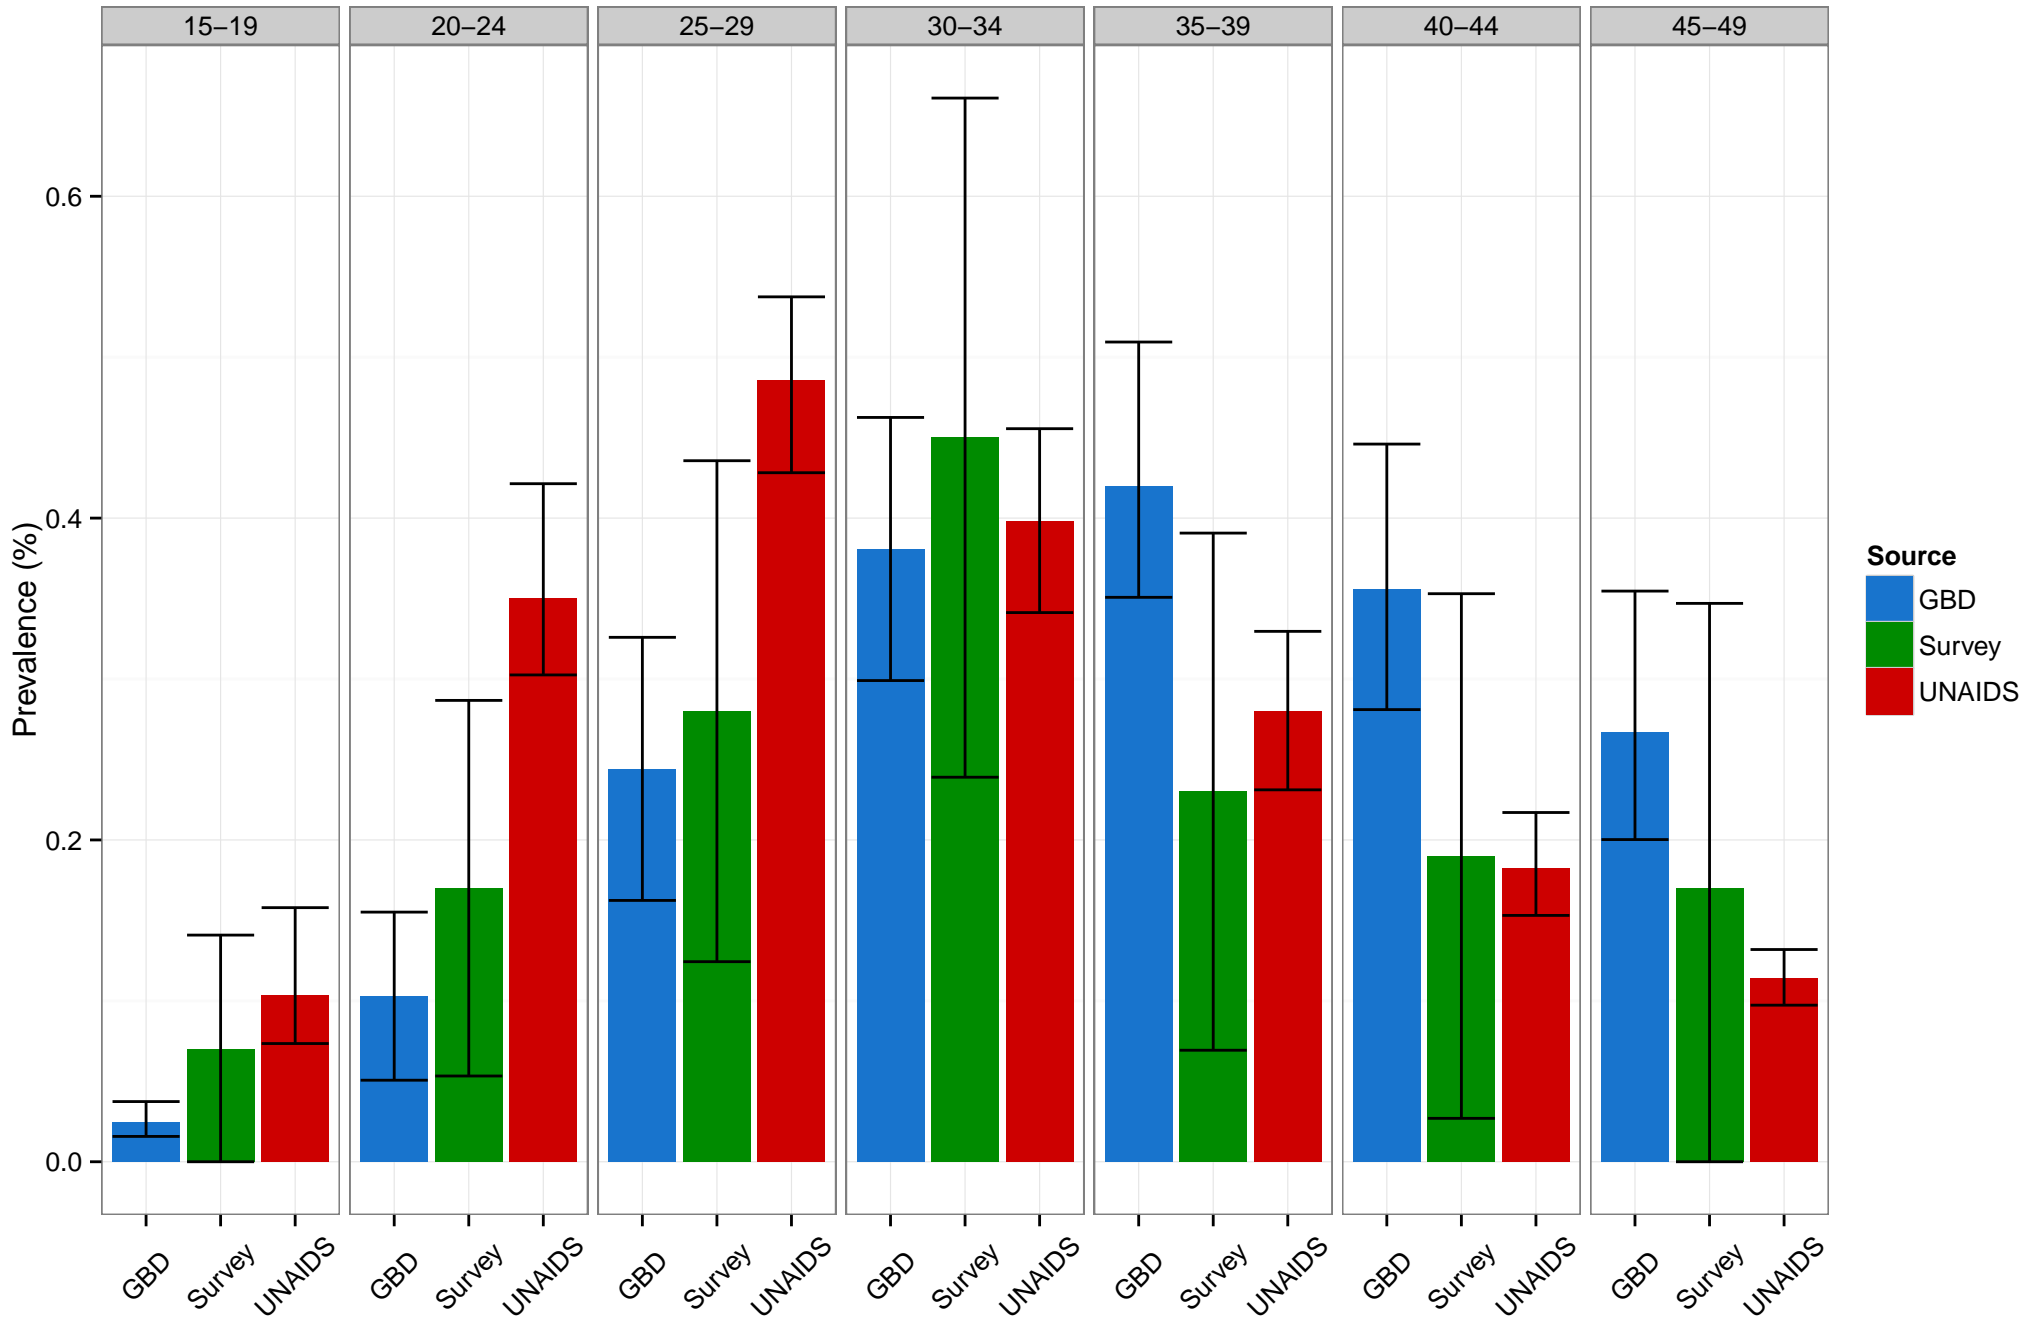



# HIV prevalence comparison to survey estimates by age-group with 95% confidence intervals

KEN 2003 Males

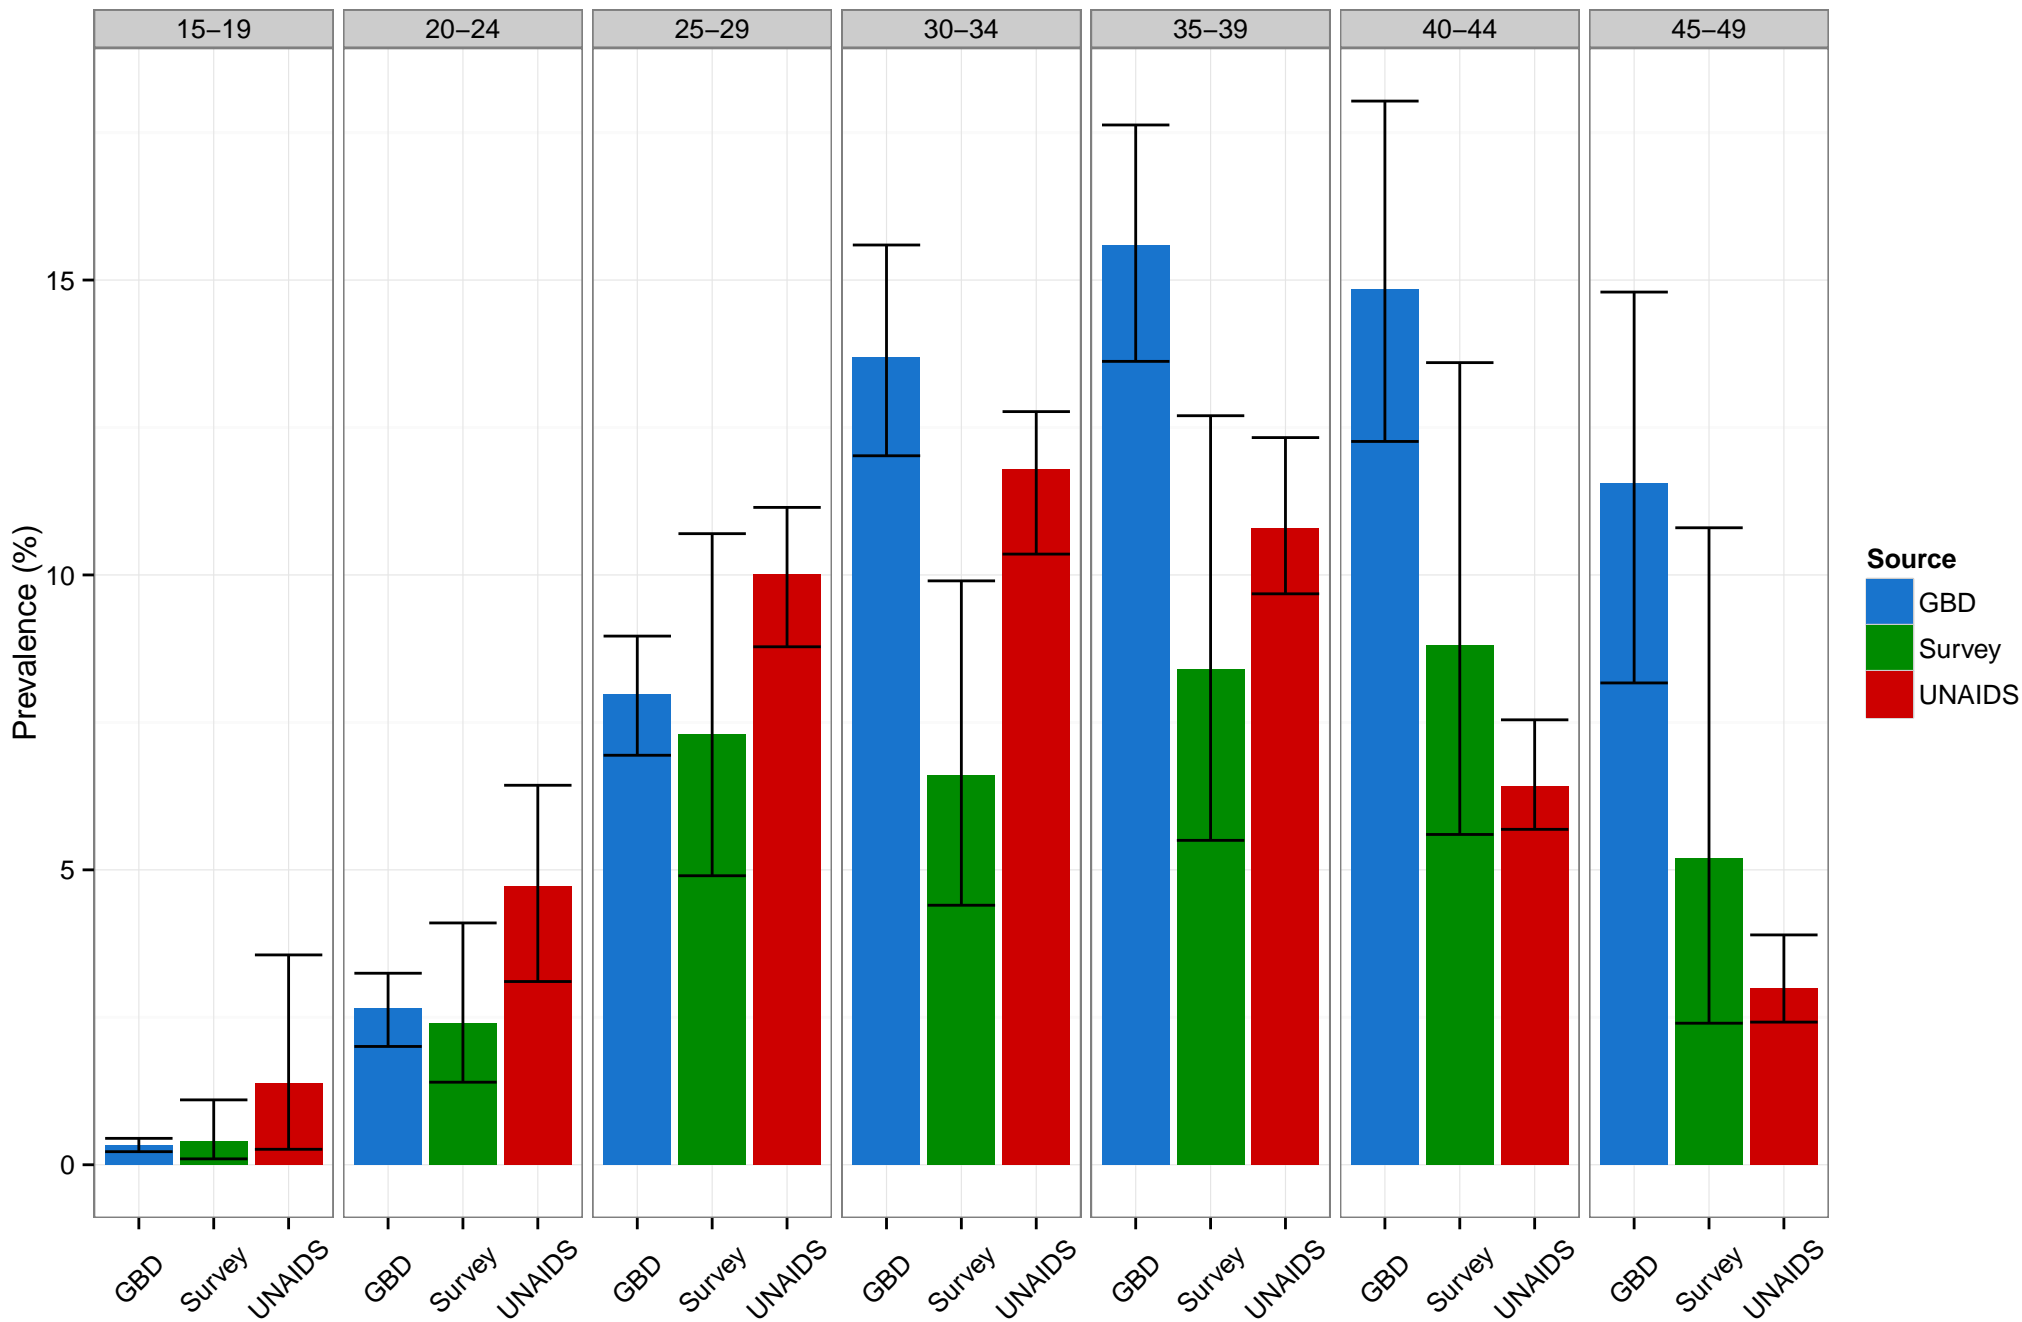

# HIV prevalence comparison to survey estimates by age-group with 95% confidence intervals

KEN 2003 Females

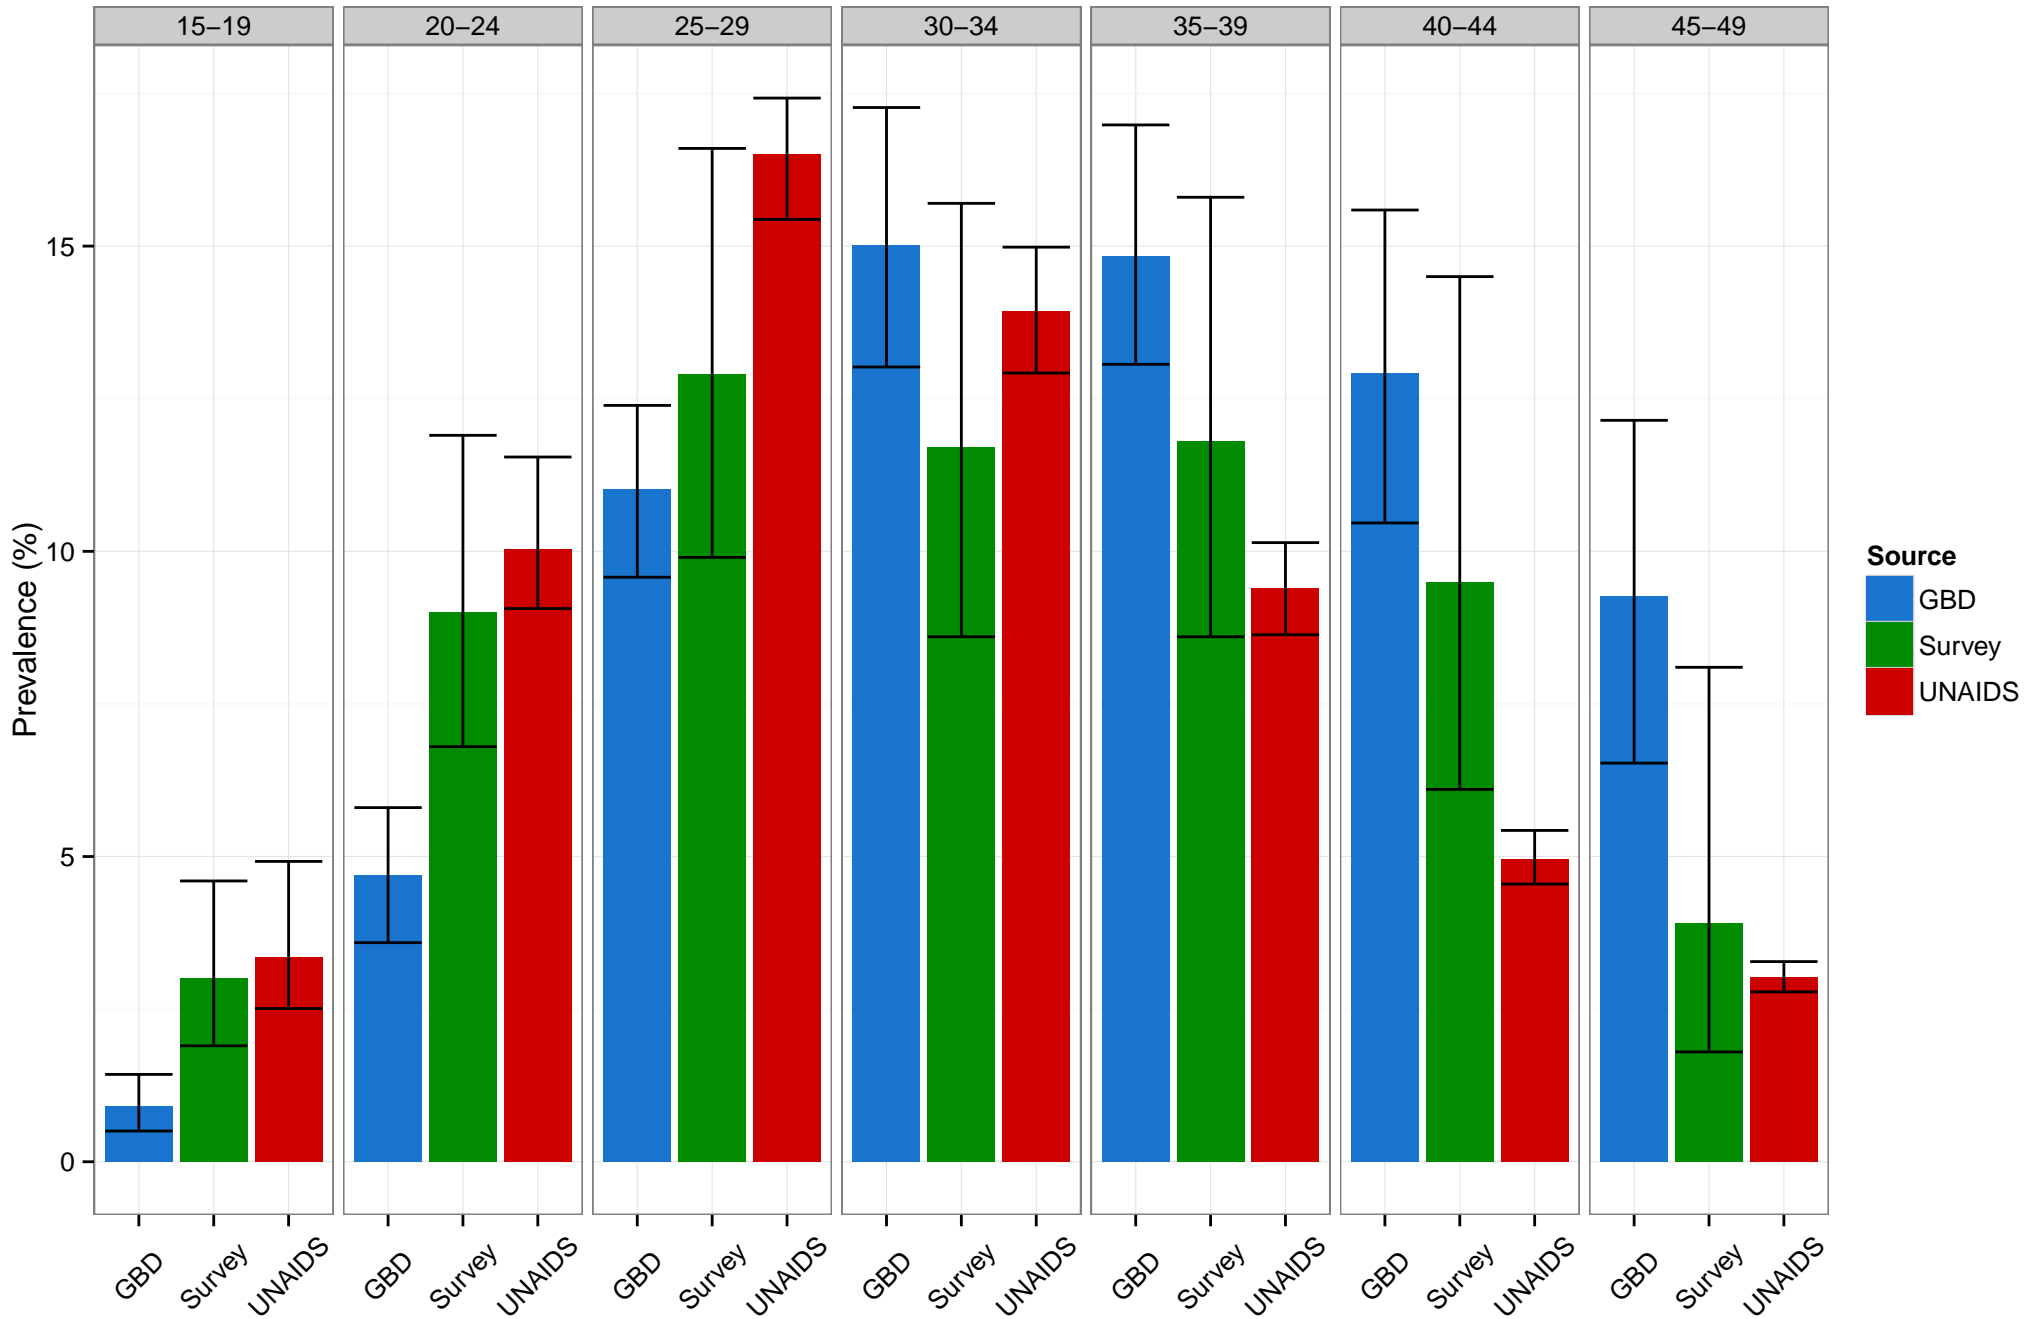

# HIV prevalence comparison to survey estimates by age-group with 95% confidence intervals

KEN 2009 Males

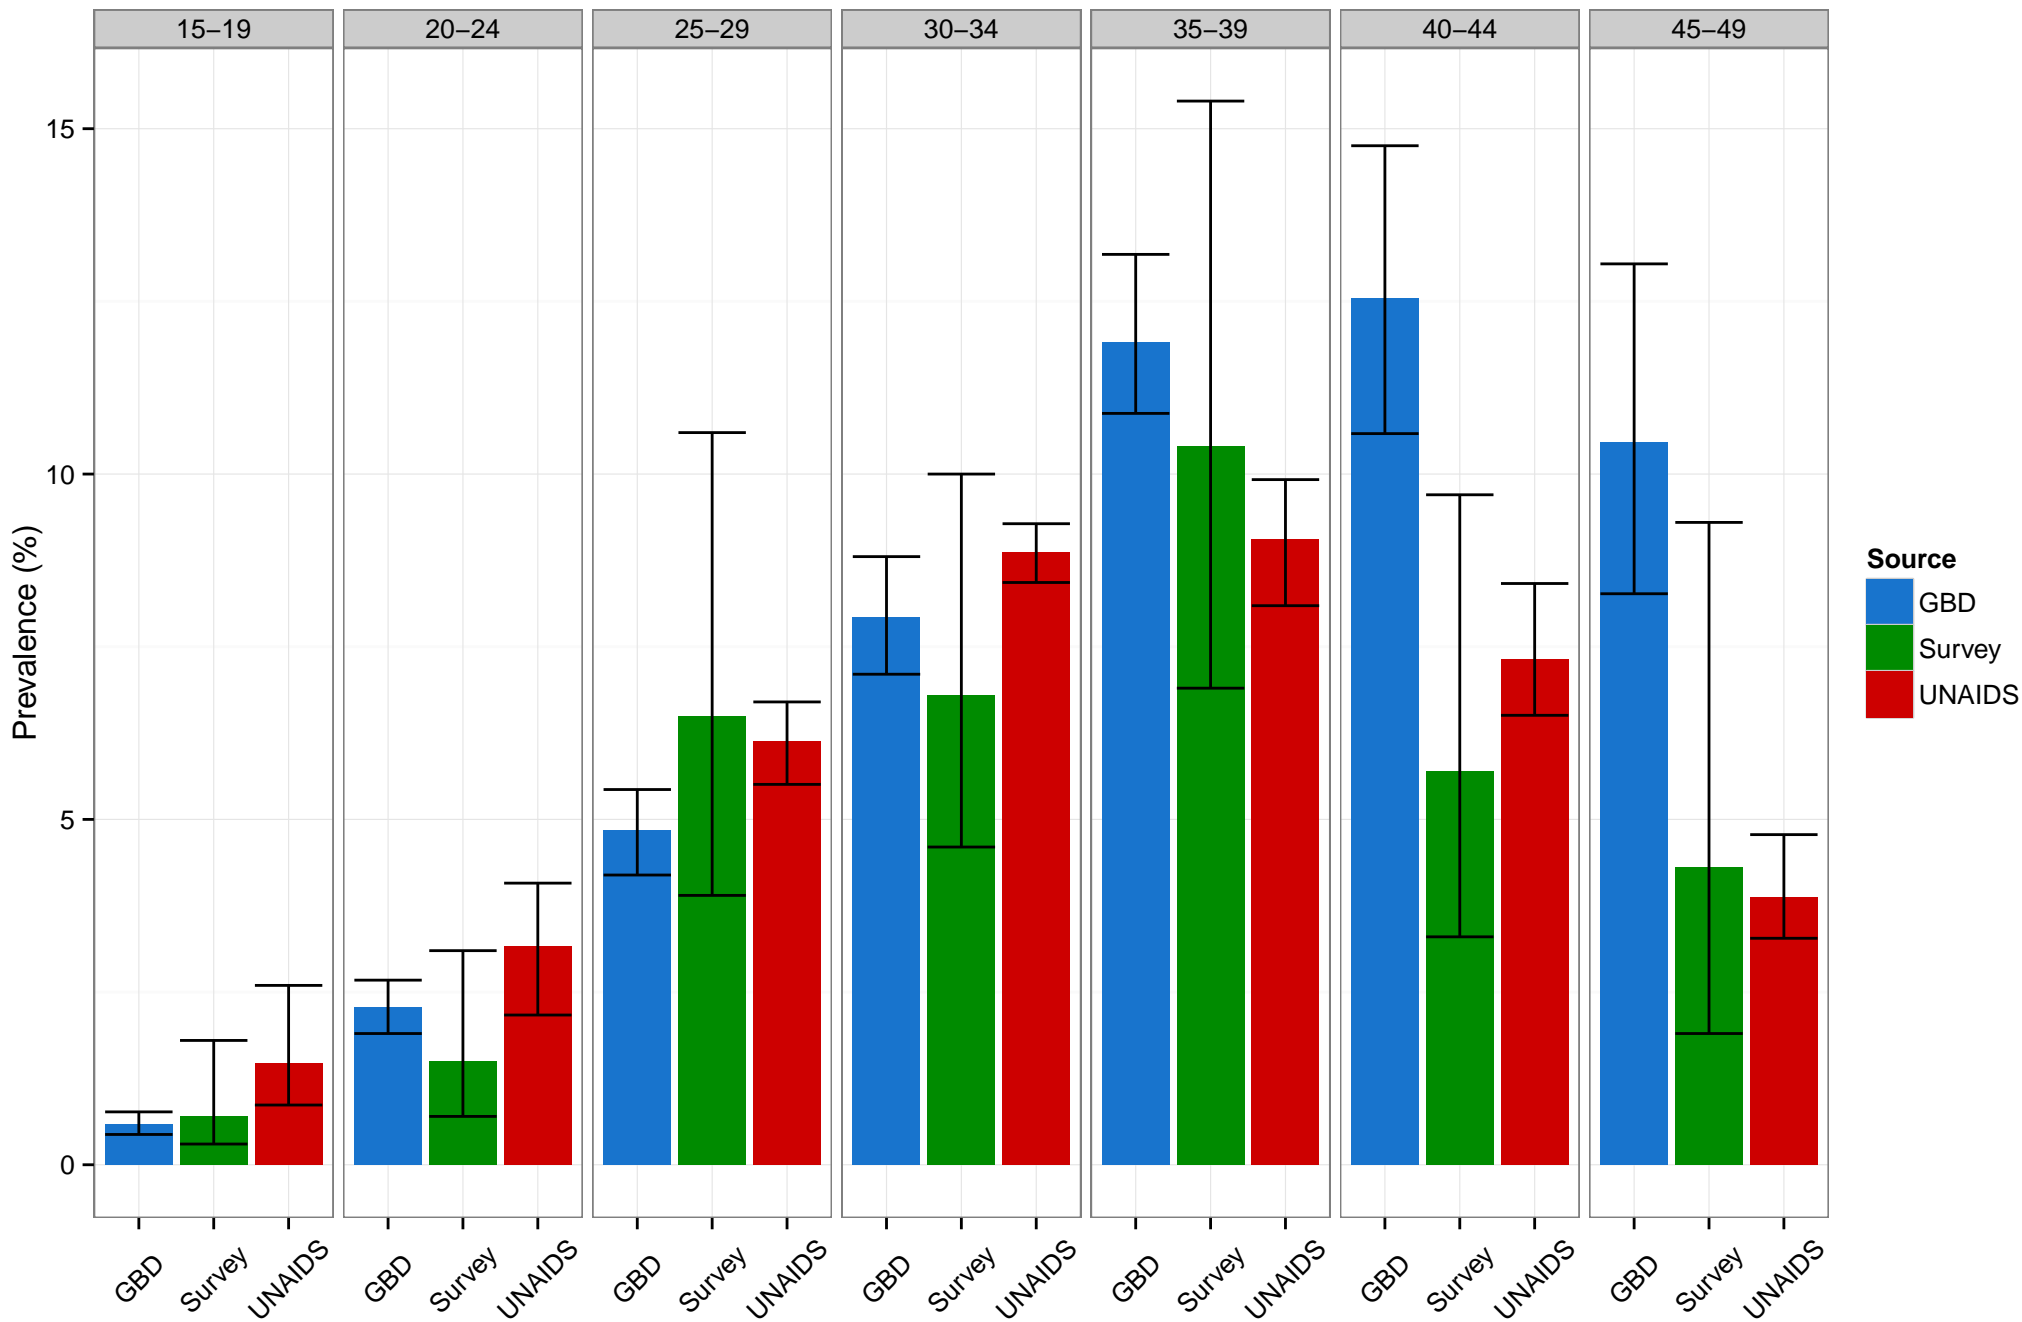

# HIV prevalence comparison to survey estimates by age-group with 95% confidence intervals

KEN 2009 Females

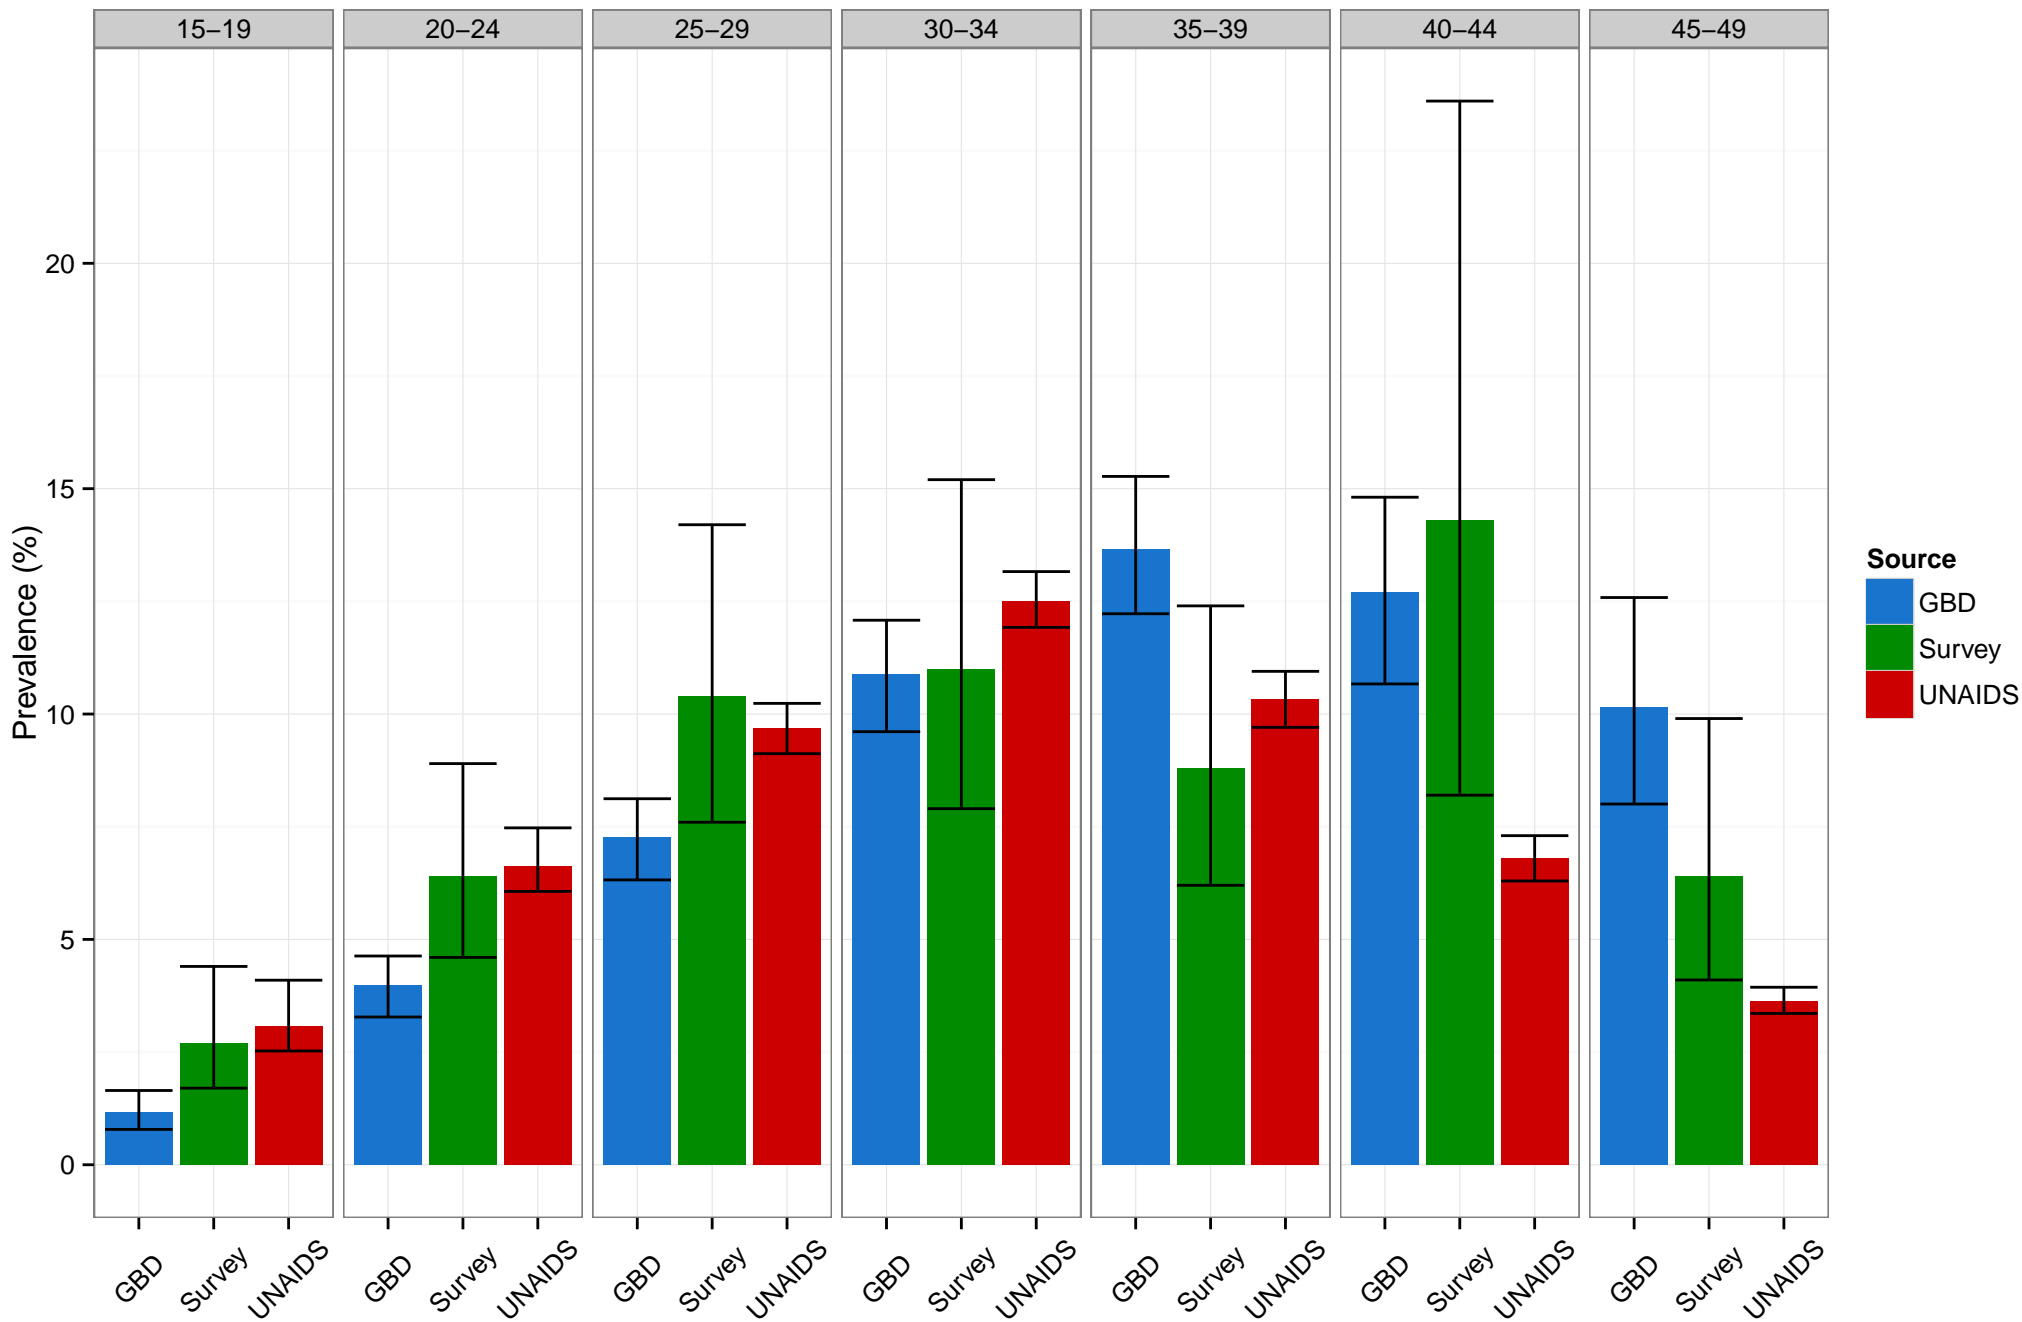

# HIV prevalence comparison to survey estimates by age-group with 95% confidence intervals

KHM 2005 Males

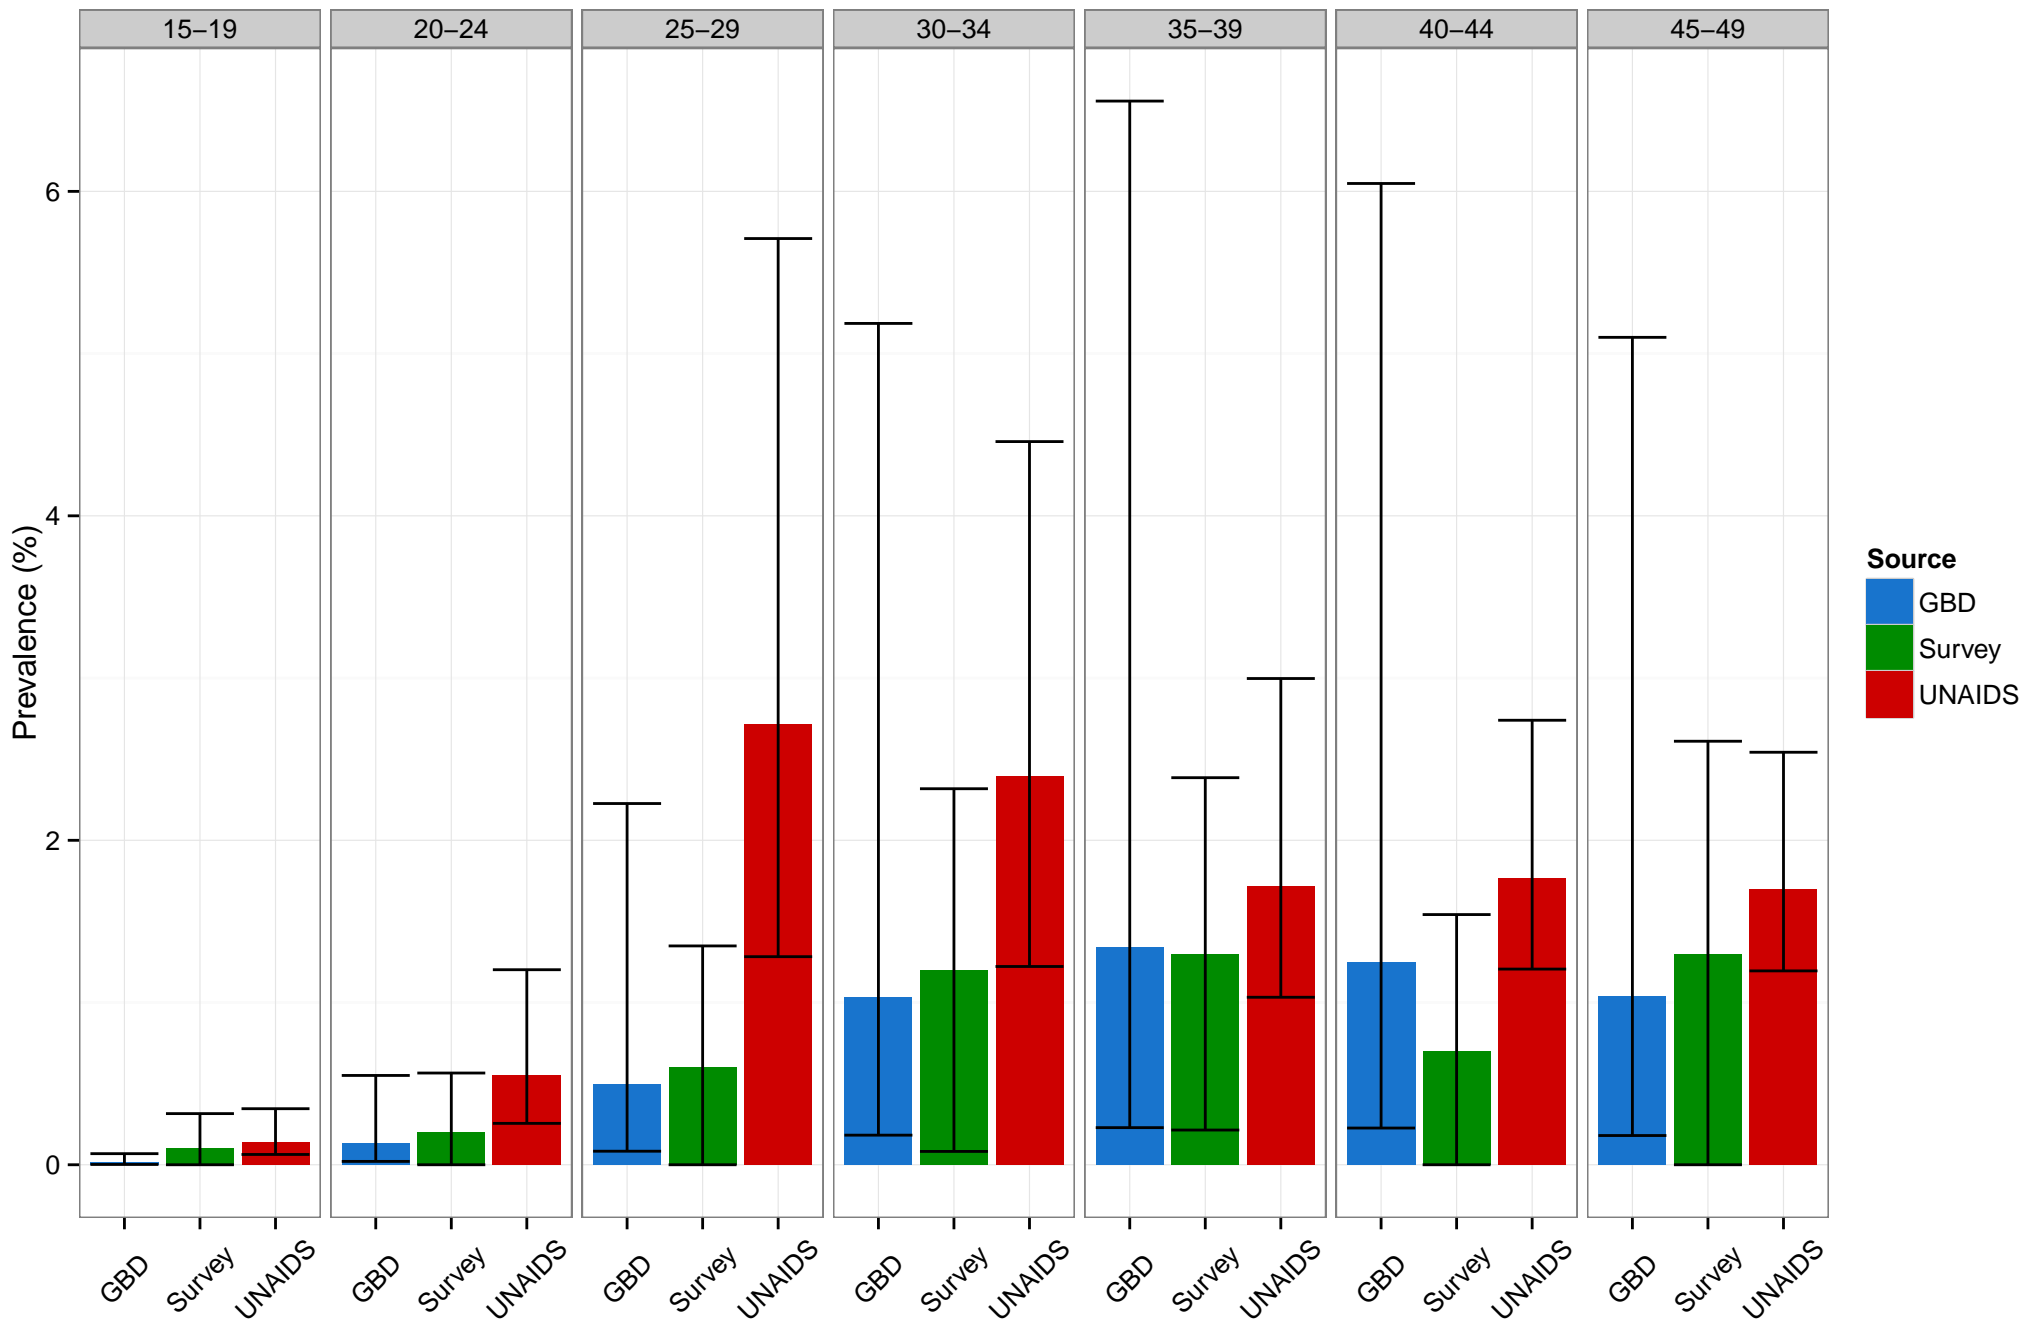

# HIV prevalence comparison to survey estimates by age-group with 95% confidence intervals

KHM 2005 Females

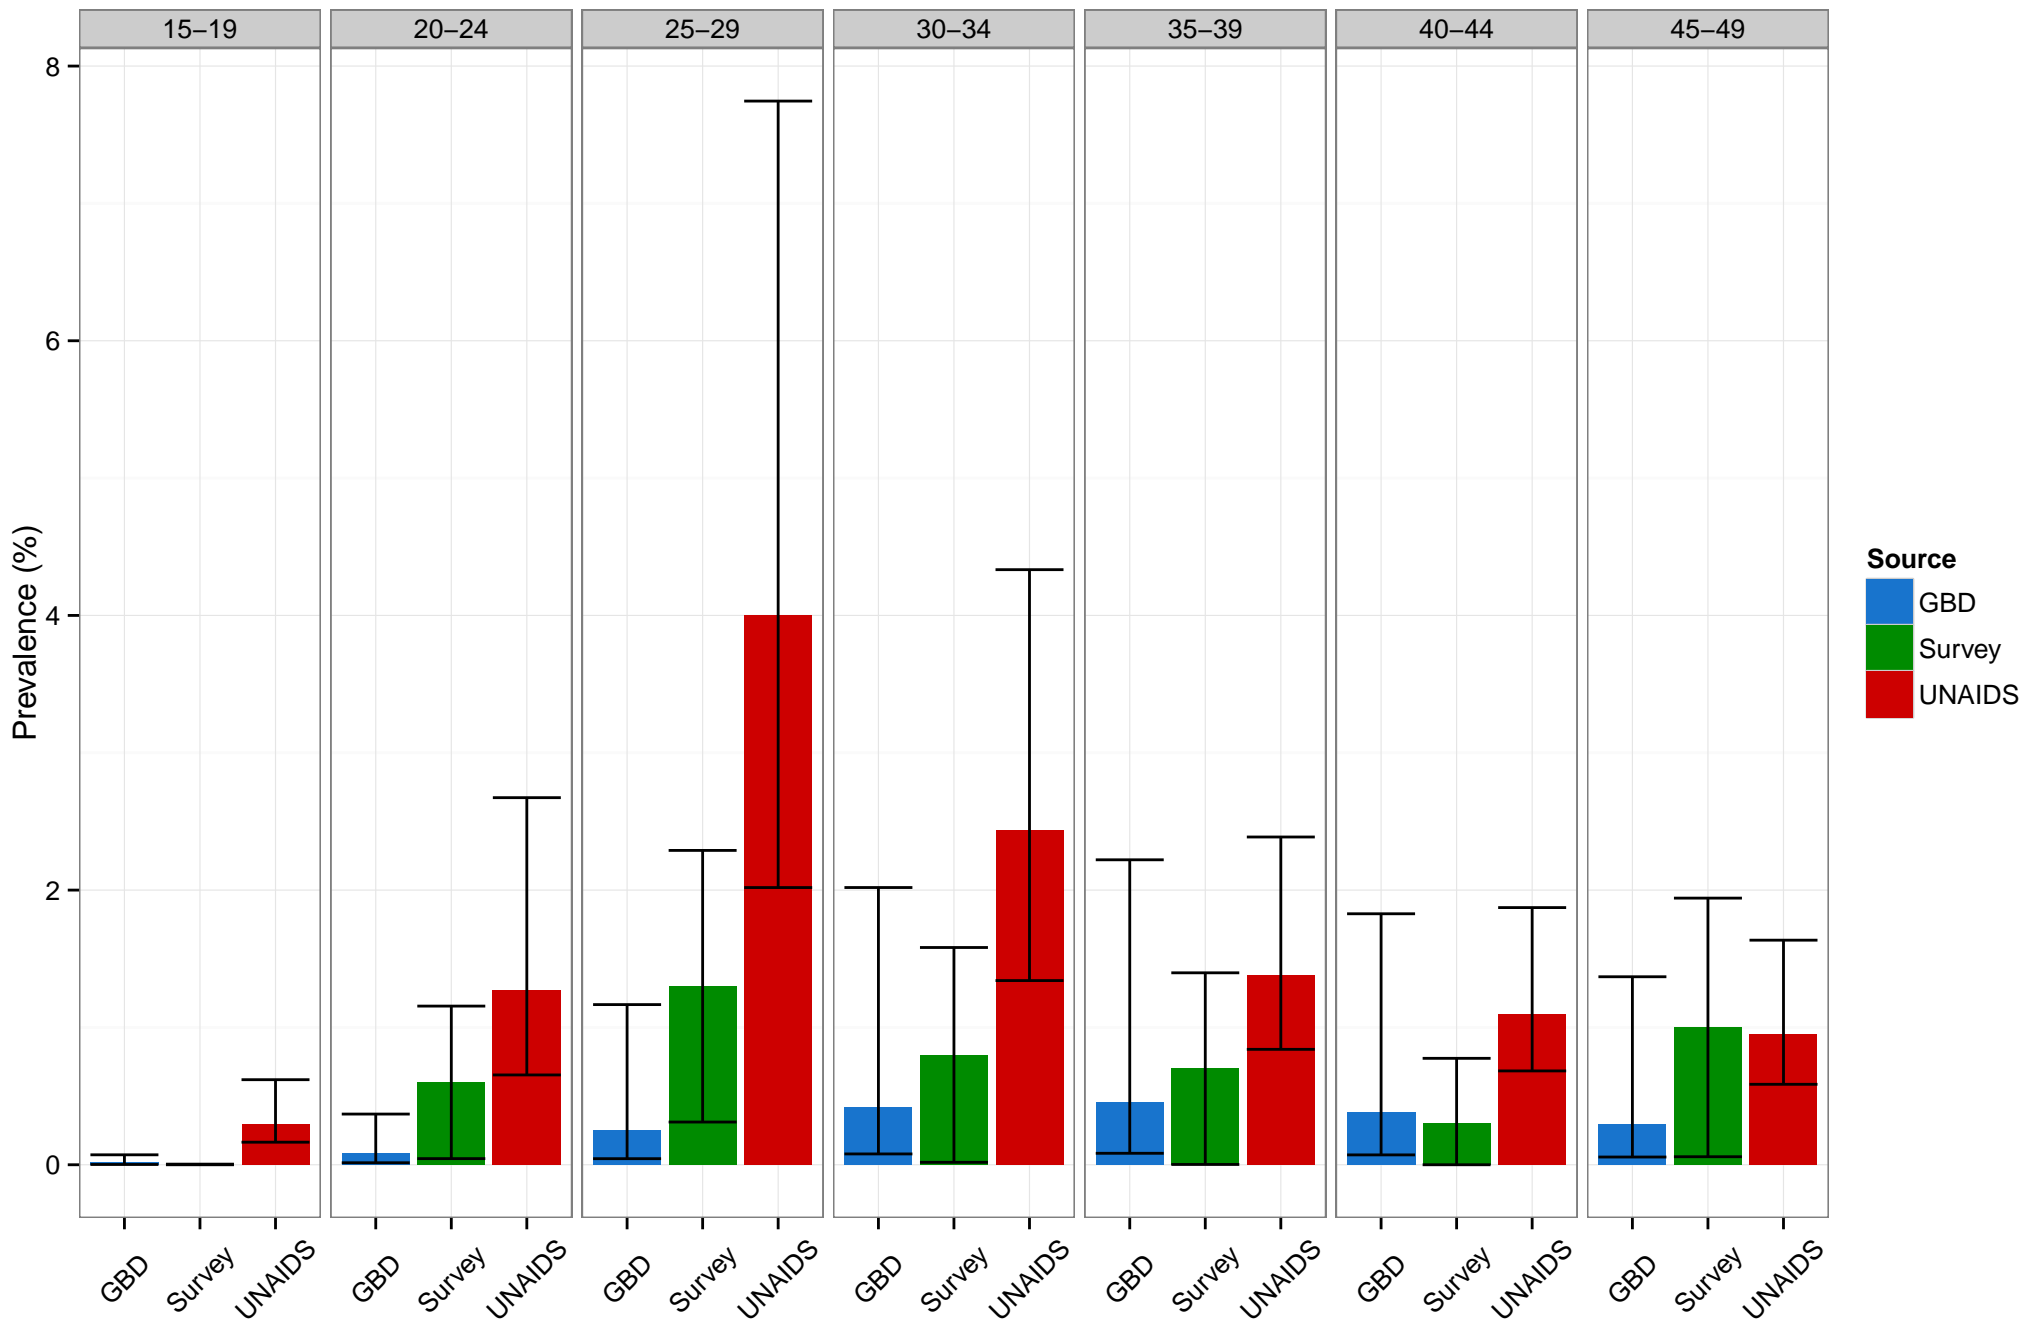

# HIV prevalence comparison to survey estimates by age-group with 95% confidence intervals

LBR 2007 Males

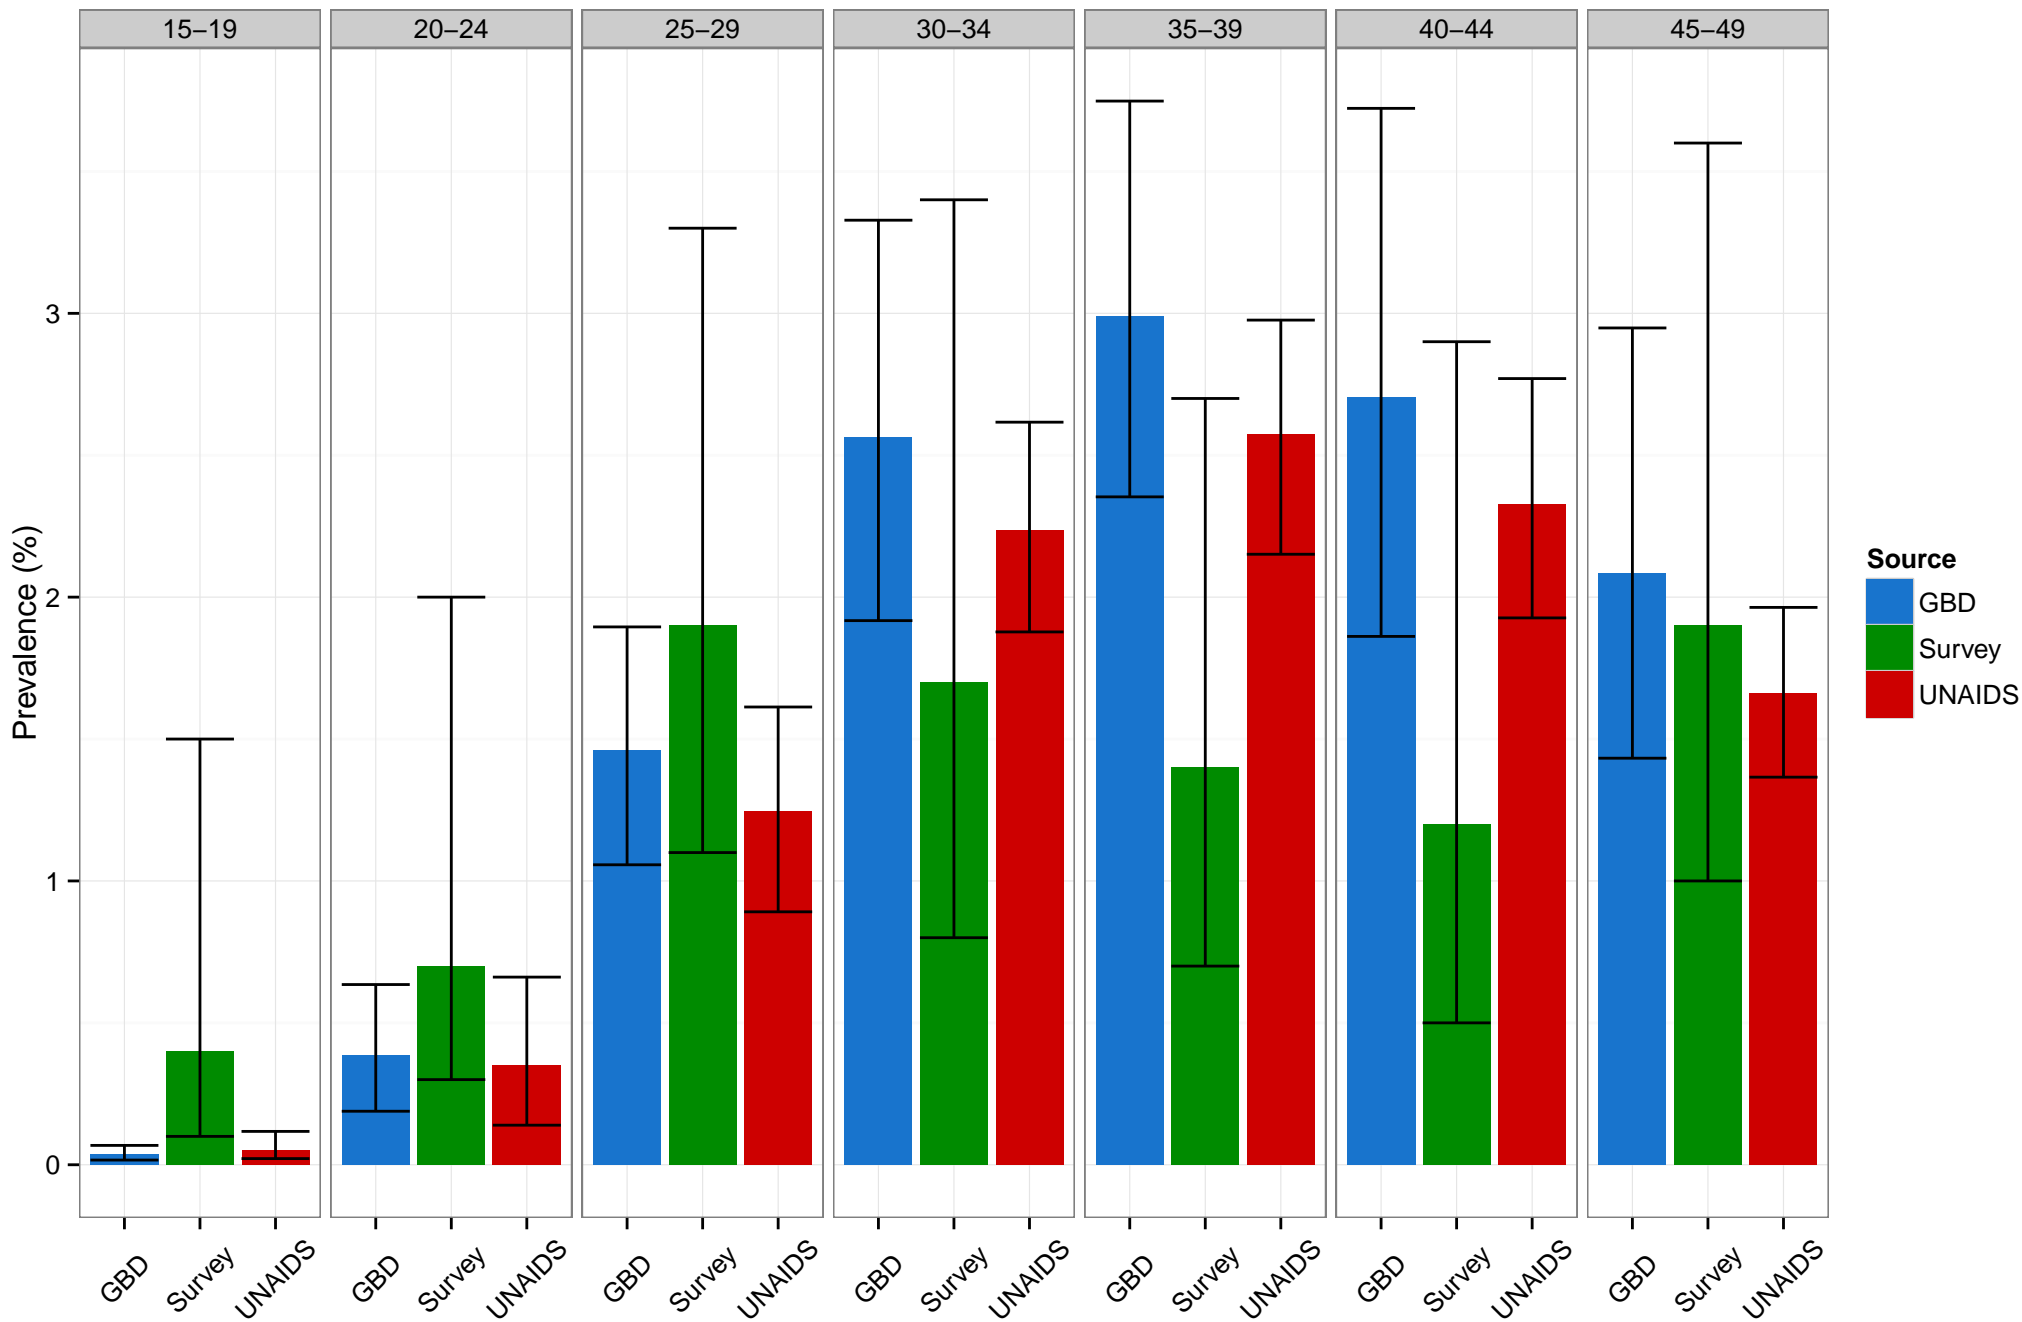

# HIV prevalence comparison to survey estimates by age-group with 95% confidence intervals

LBR 2007 Females

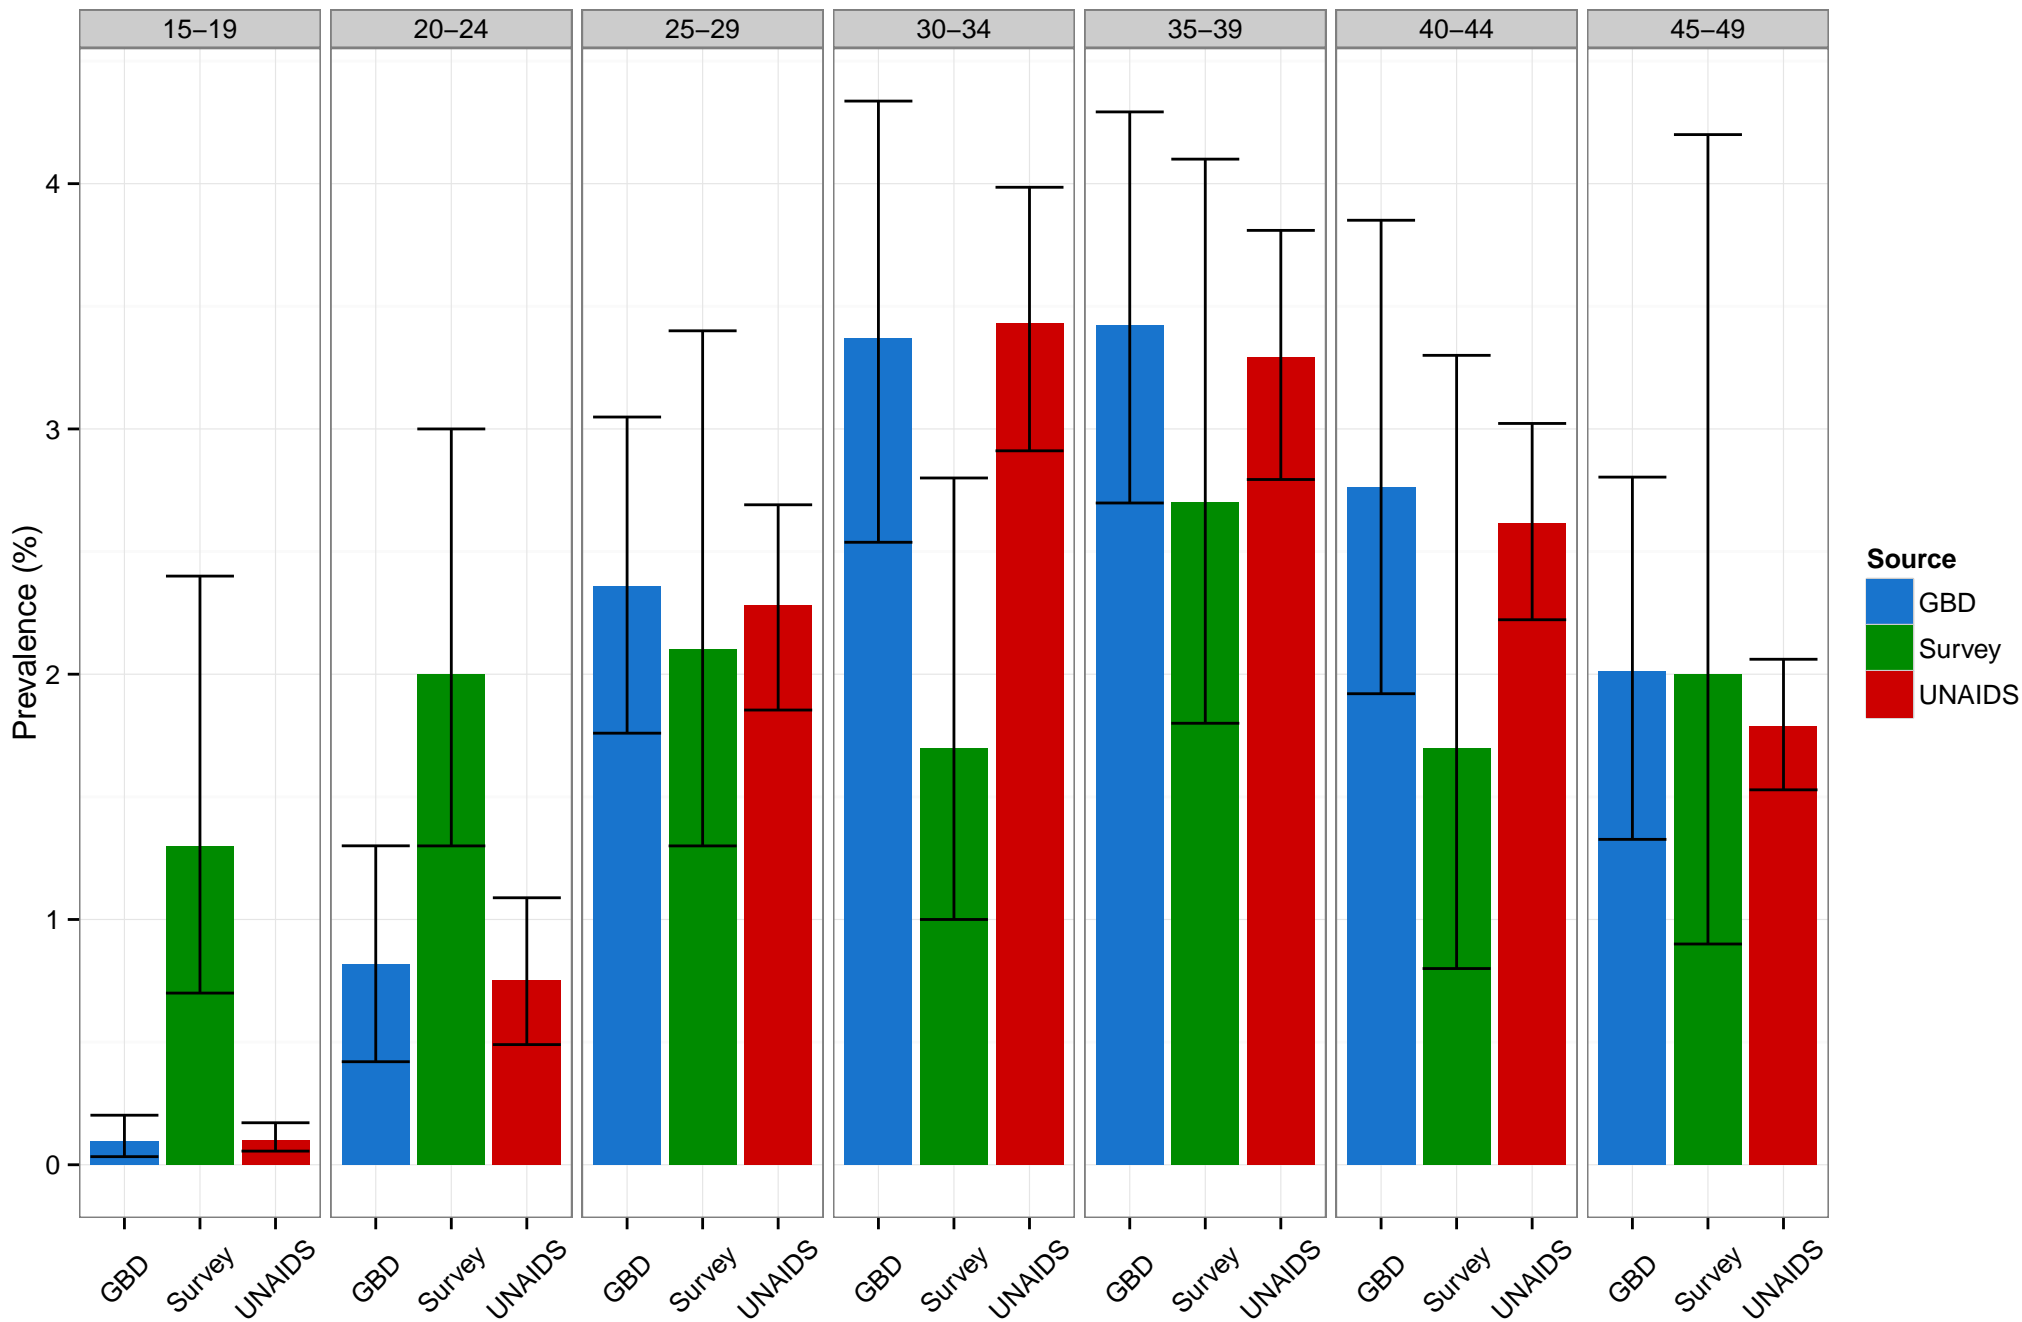



# HIV prevalence comparison to survey estimates by age-group with 95% confidence intervals

LSO 2003 Males

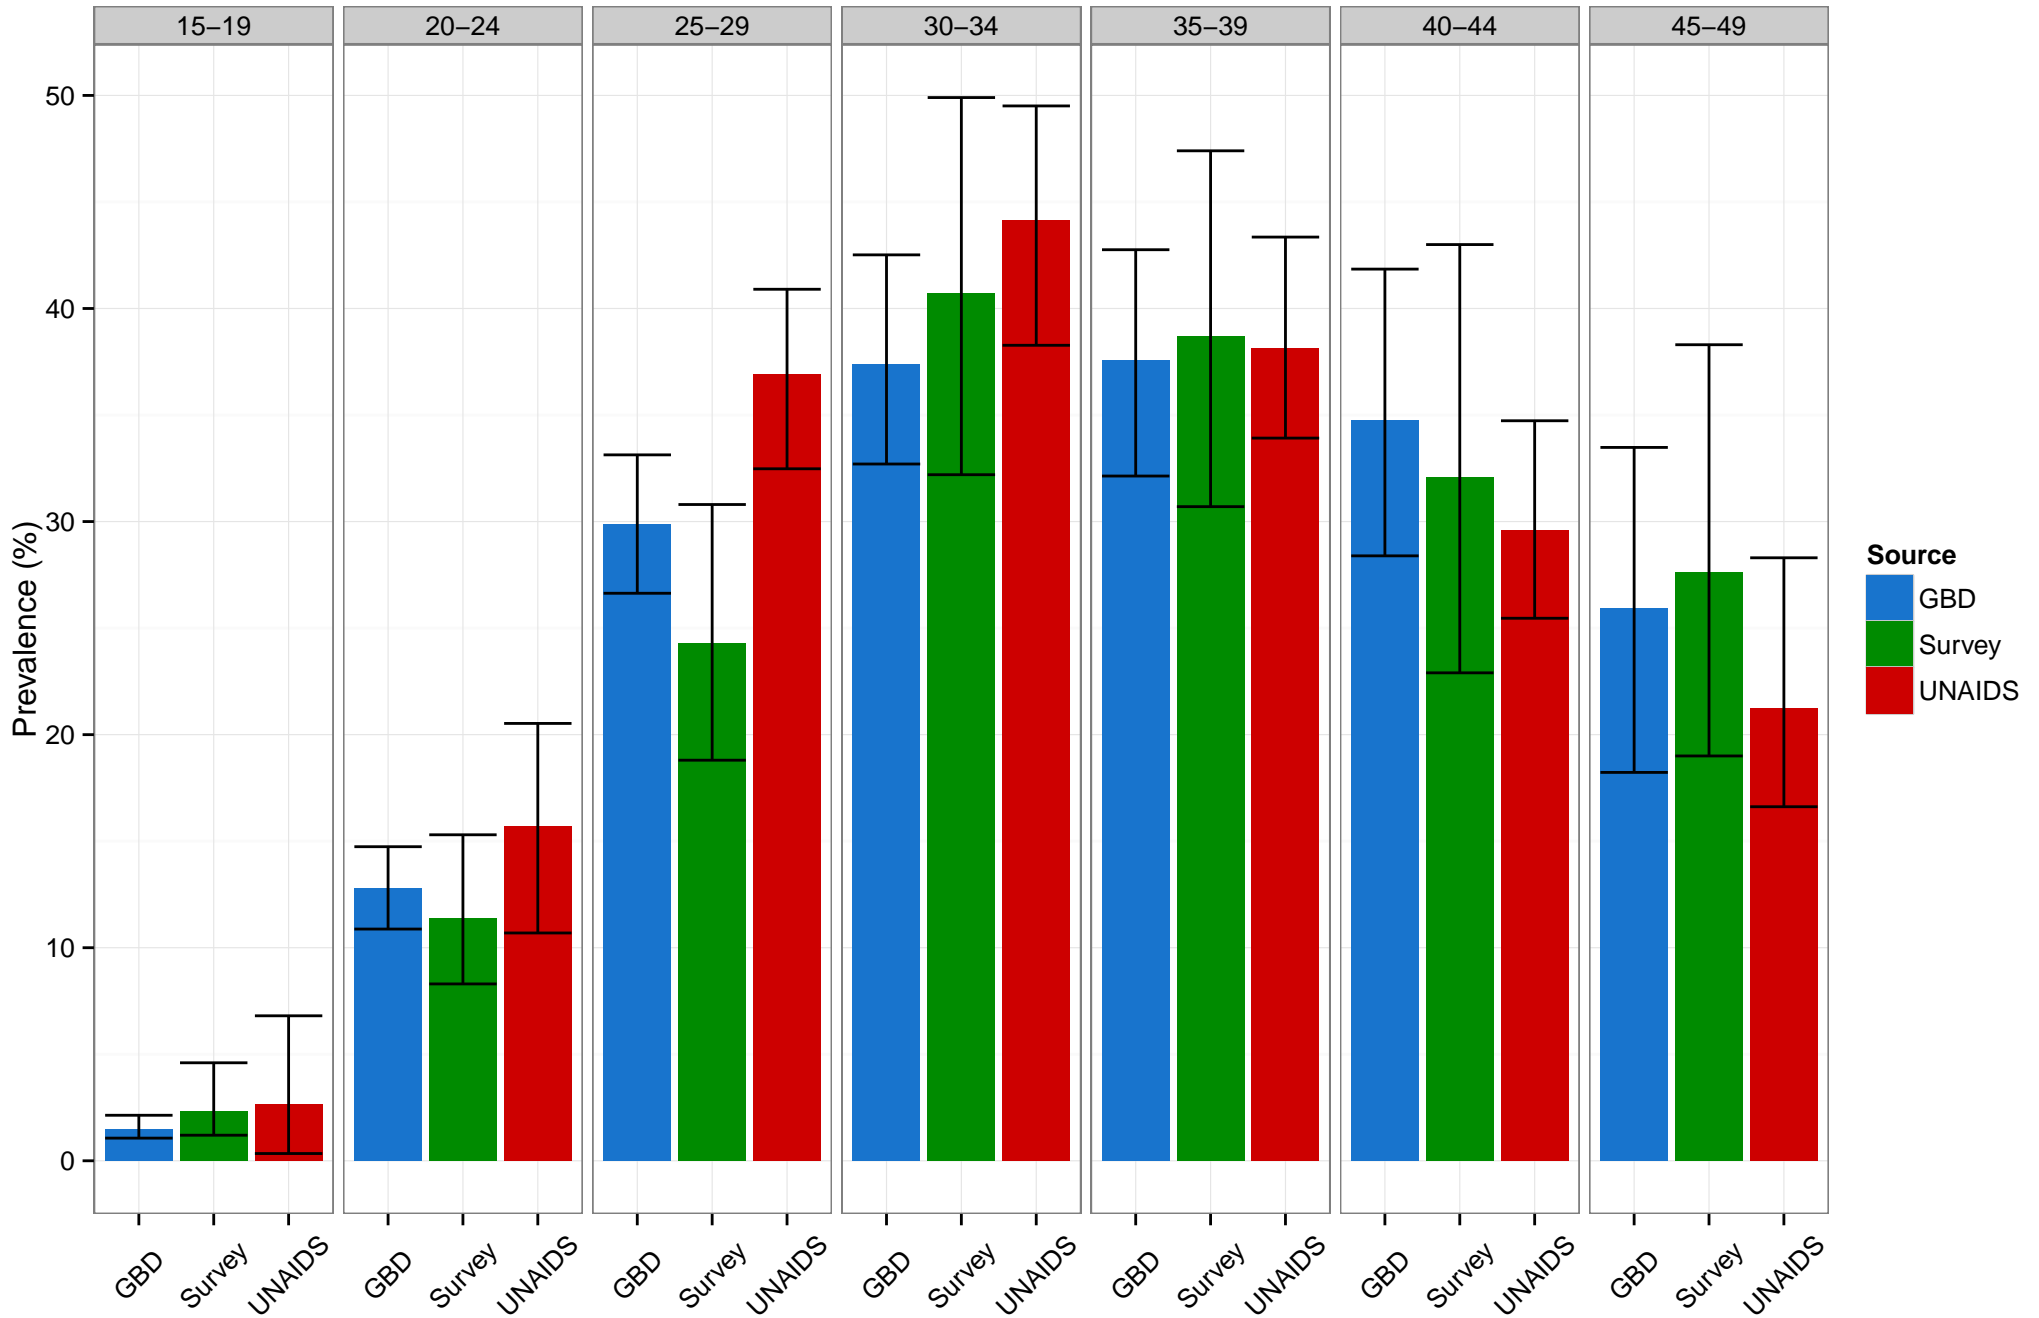

# HIV prevalence comparison to survey estimates by age-group with 95% confidence intervals

LSO 2003 Females

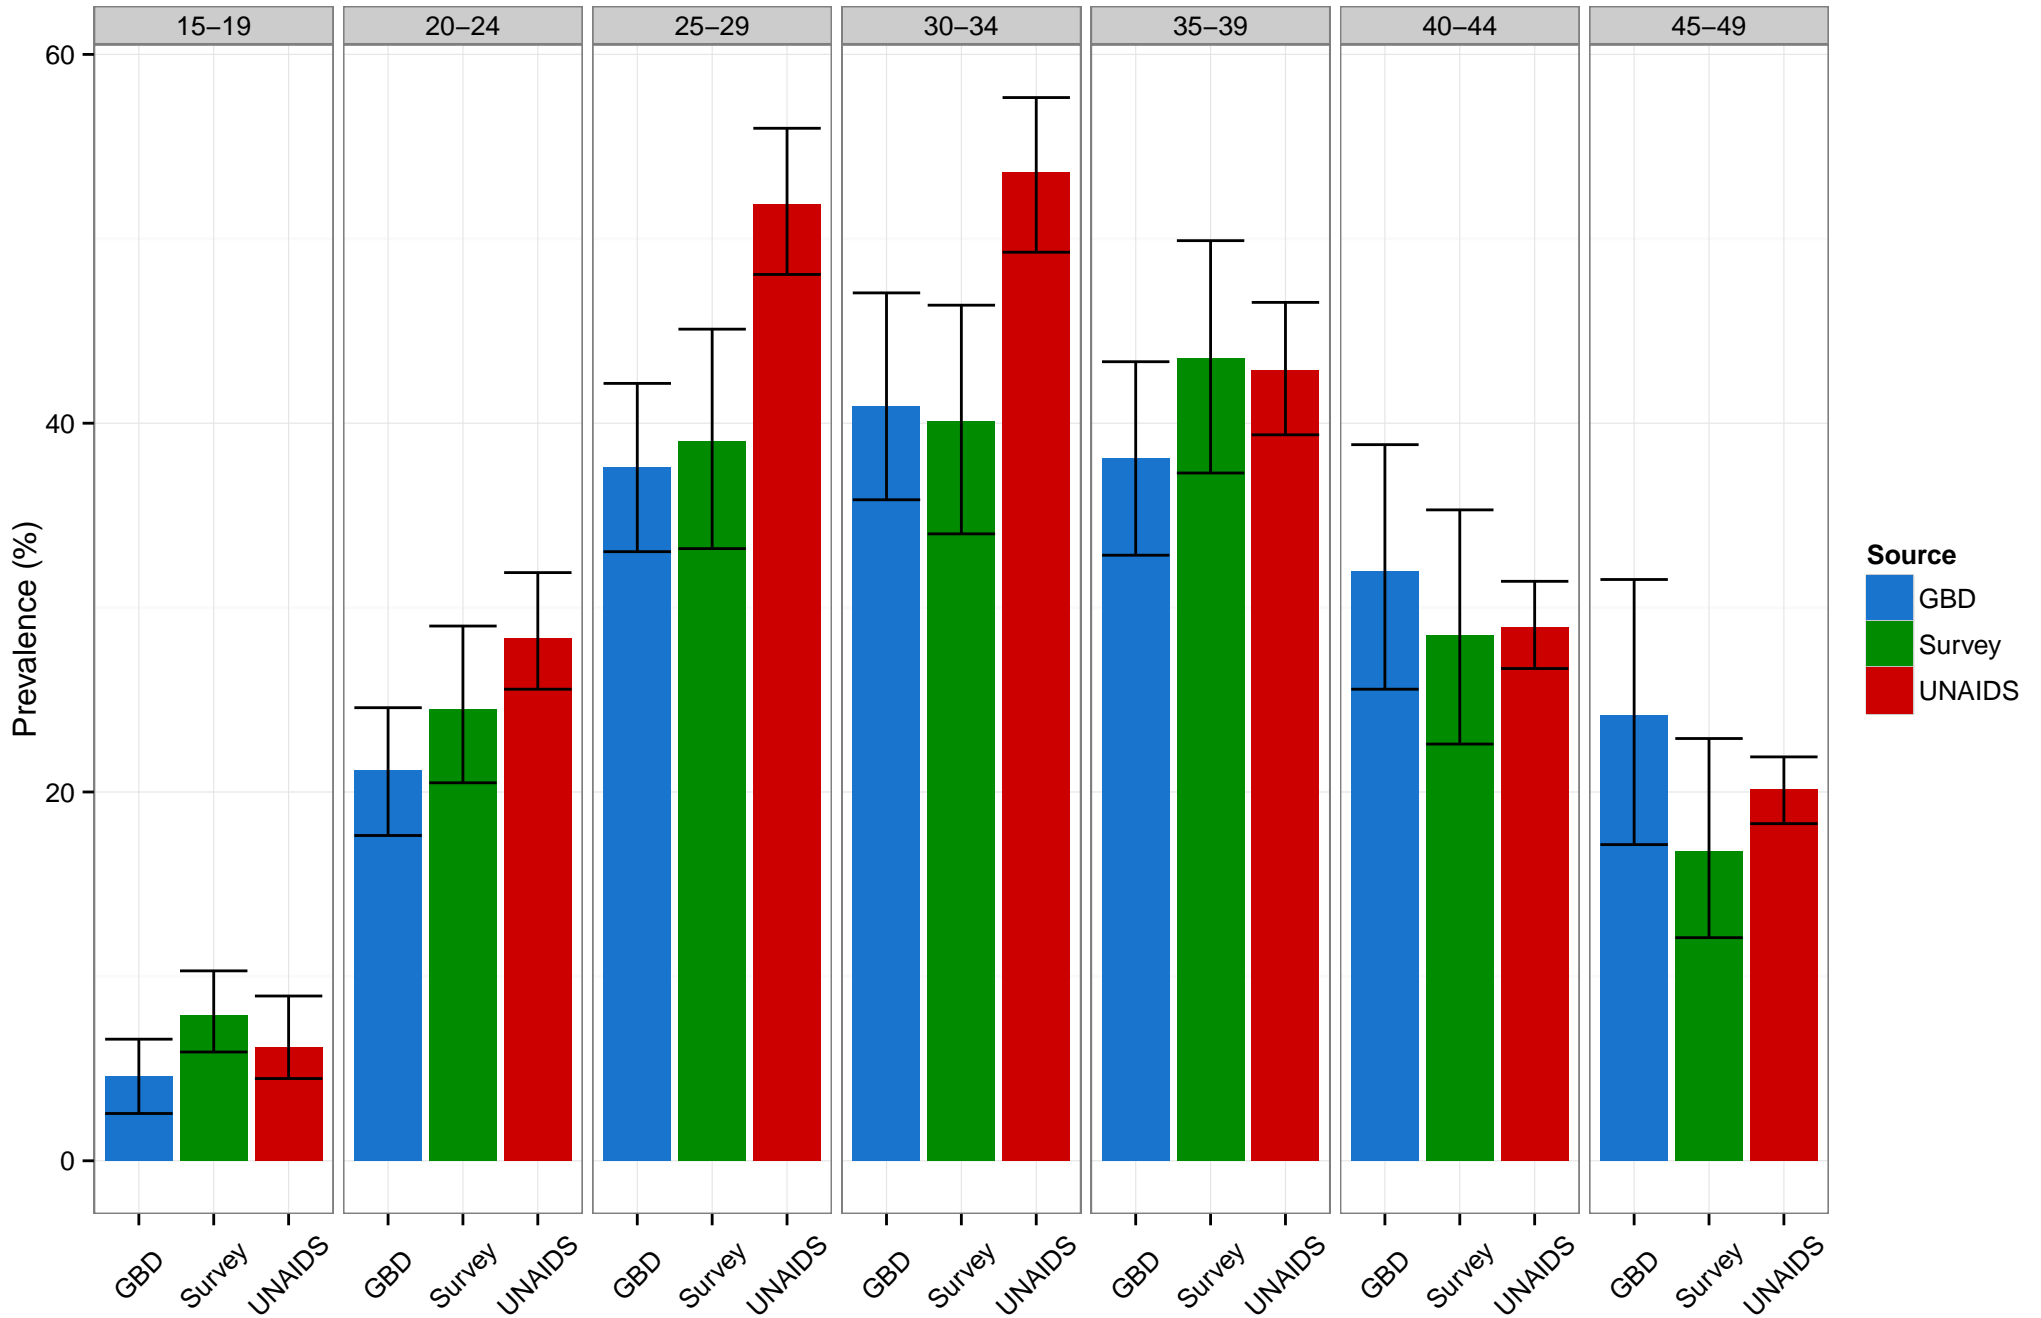

# HIV prevalence comparison to survey estimates by age-group with 95% confidence intervals

LSO 2009 Males

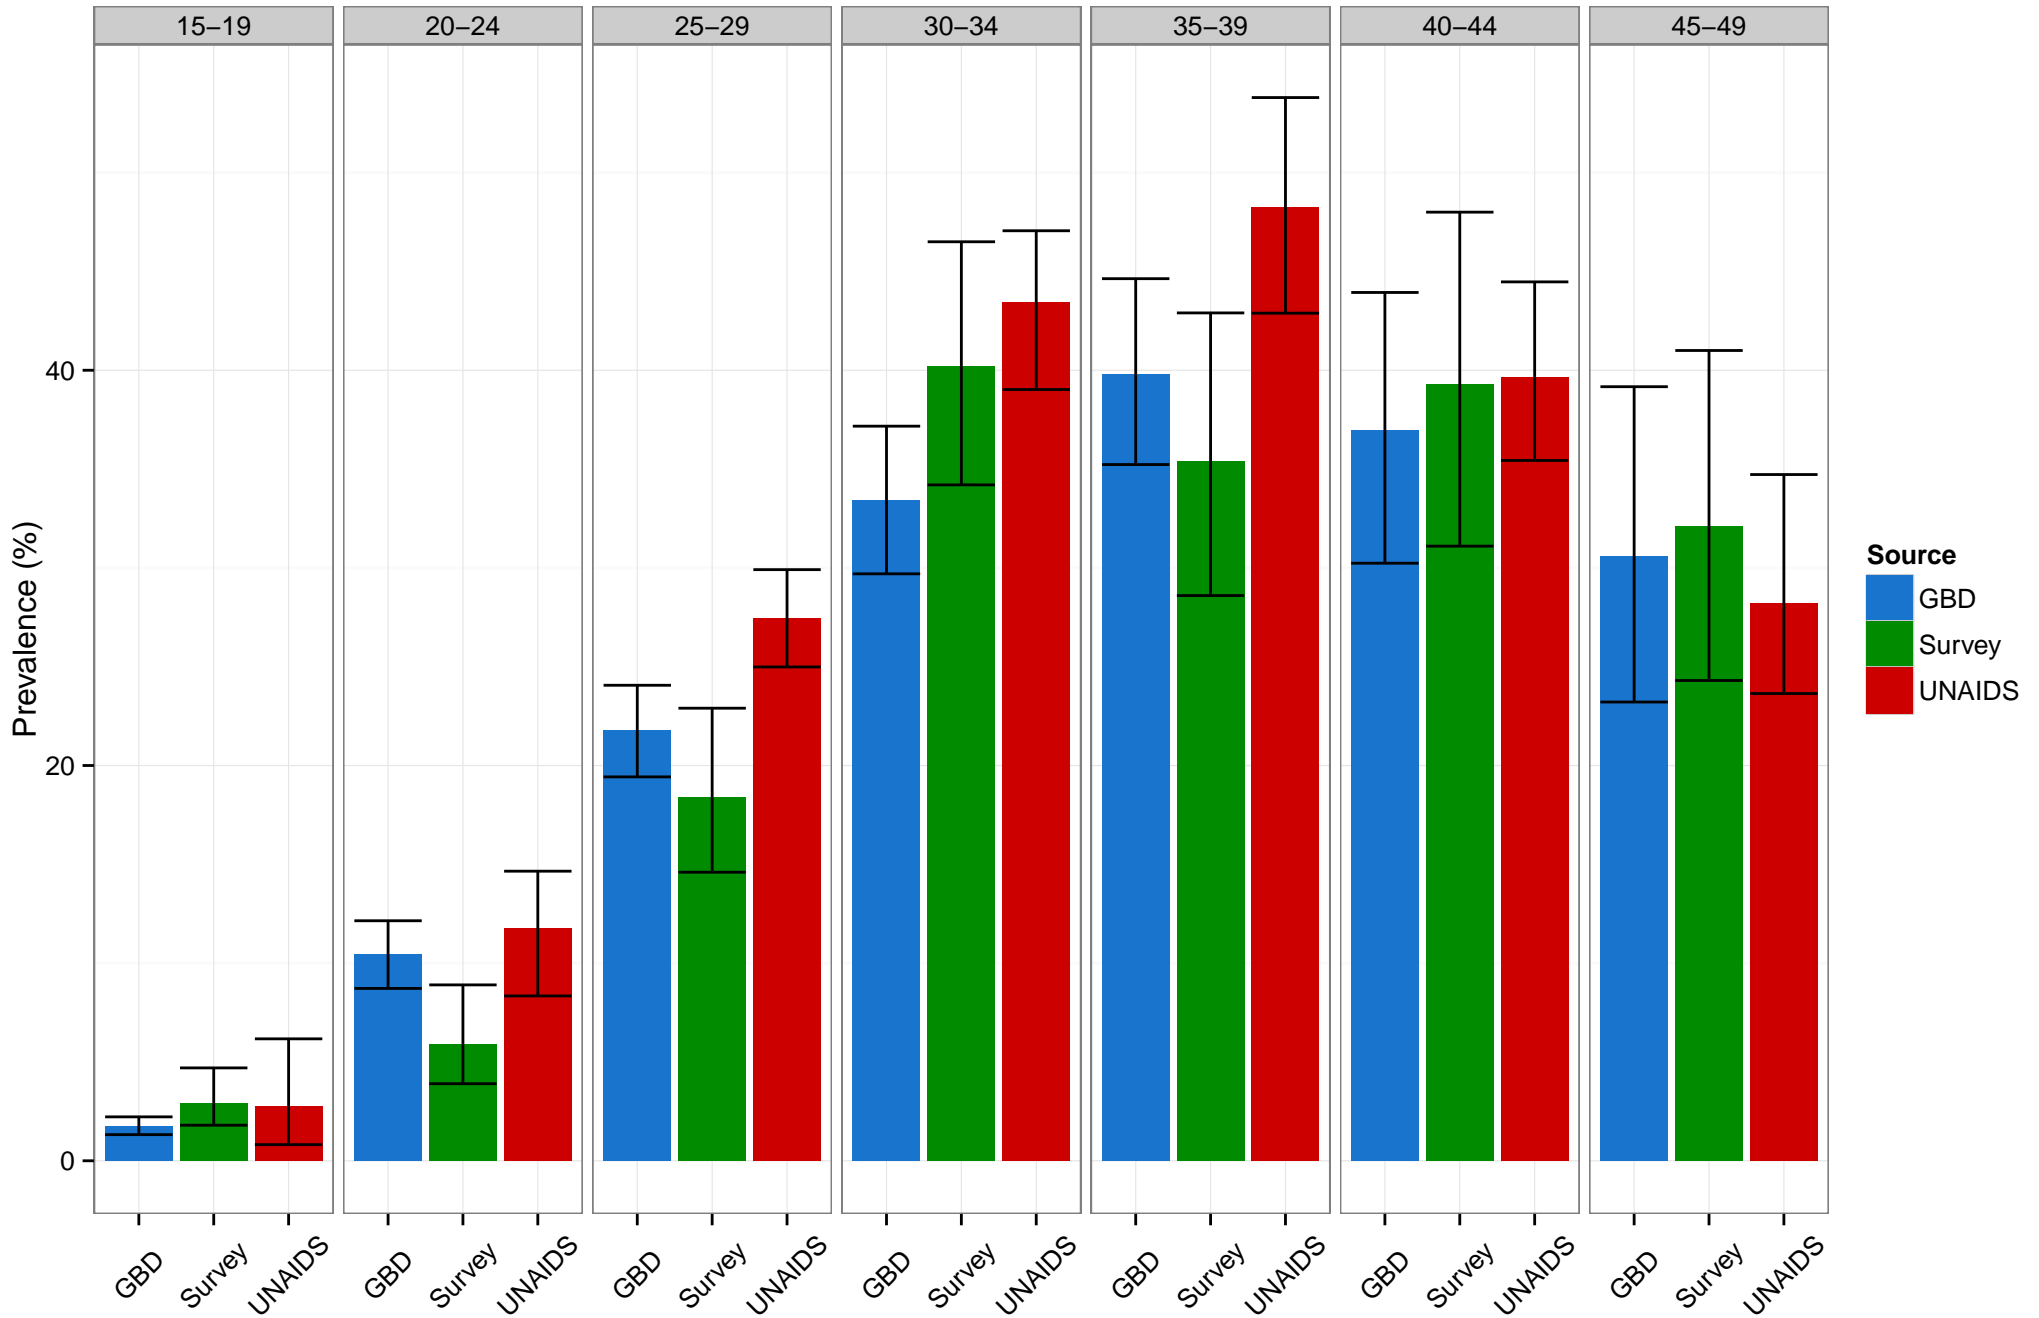

# HIV prevalence comparison to survey estimates by age-group with 95% confidence intervals

LSO 2009 Females

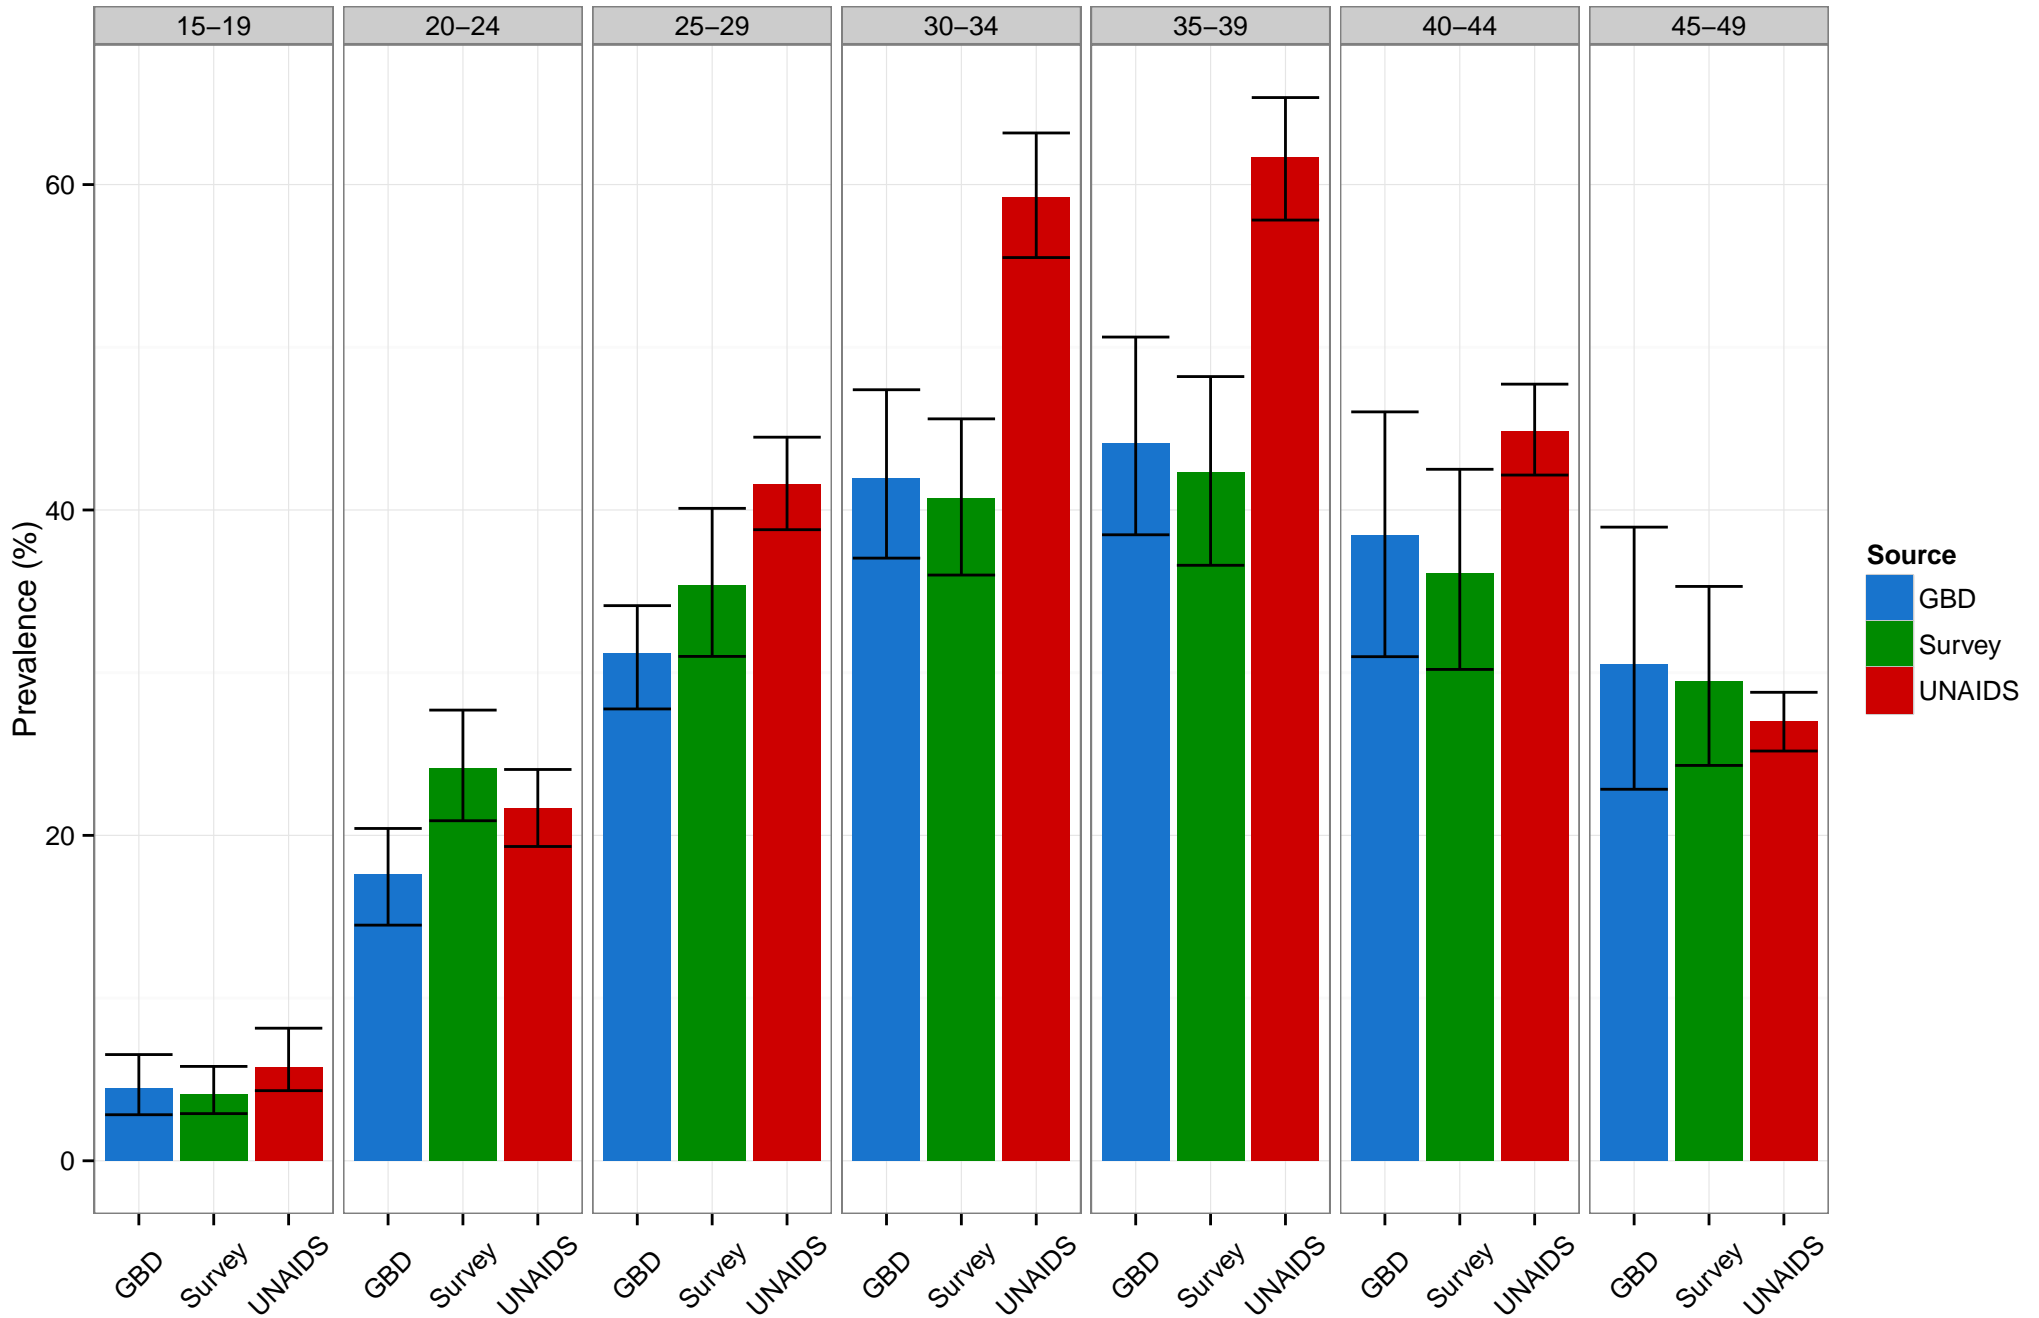

# HIV prevalence comparison to survey estimates by age-group with 95% confidence intervals

MLI 2001 Males

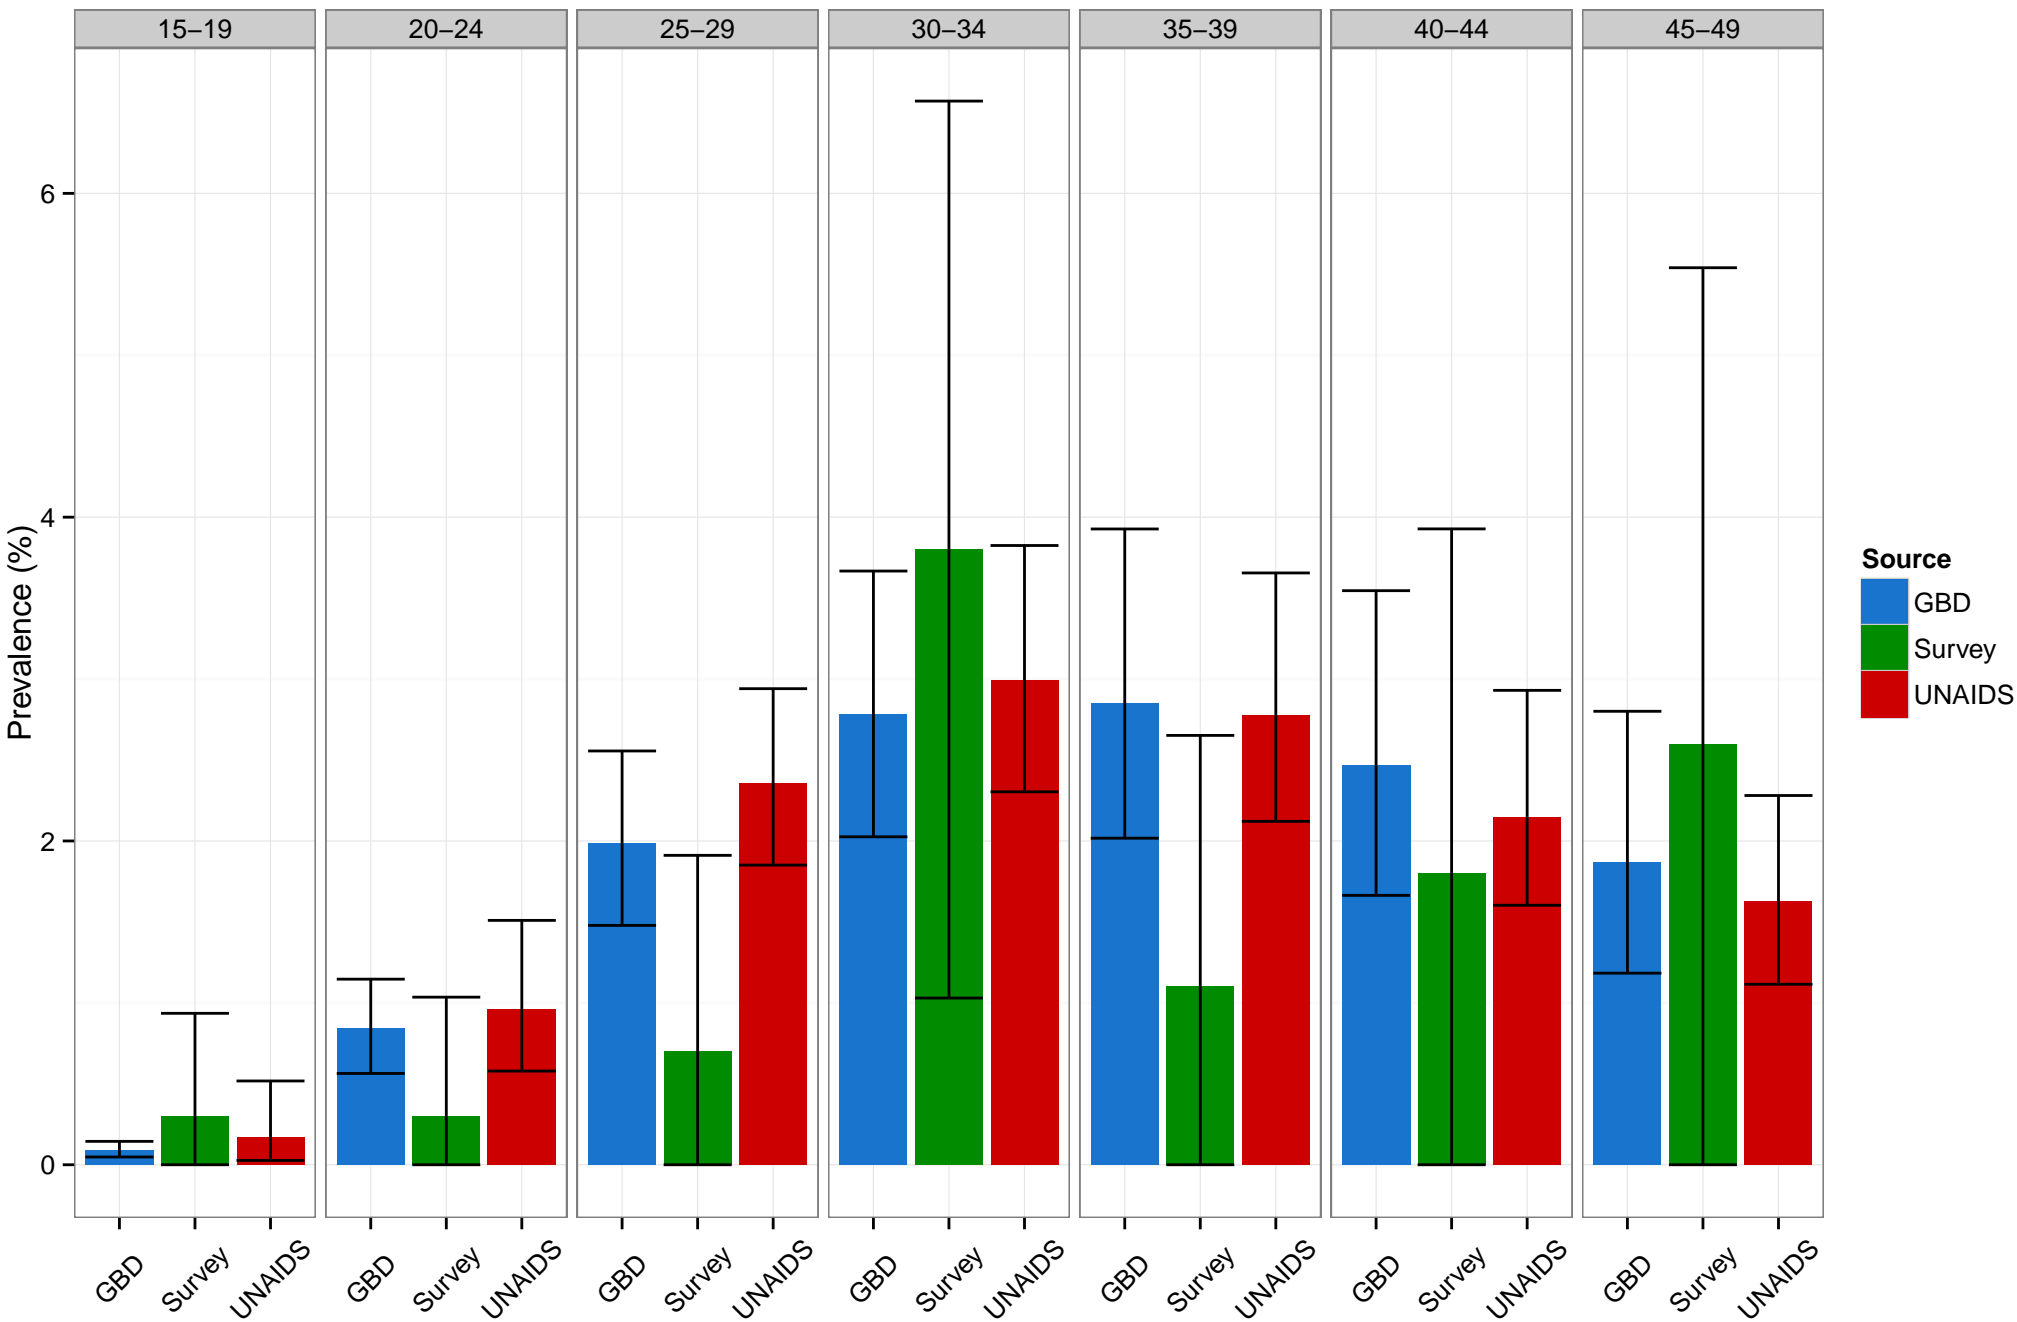

# HIV prevalence comparison to survey estimates by age-group with 95% confidence intervals

MLI 2001 Females

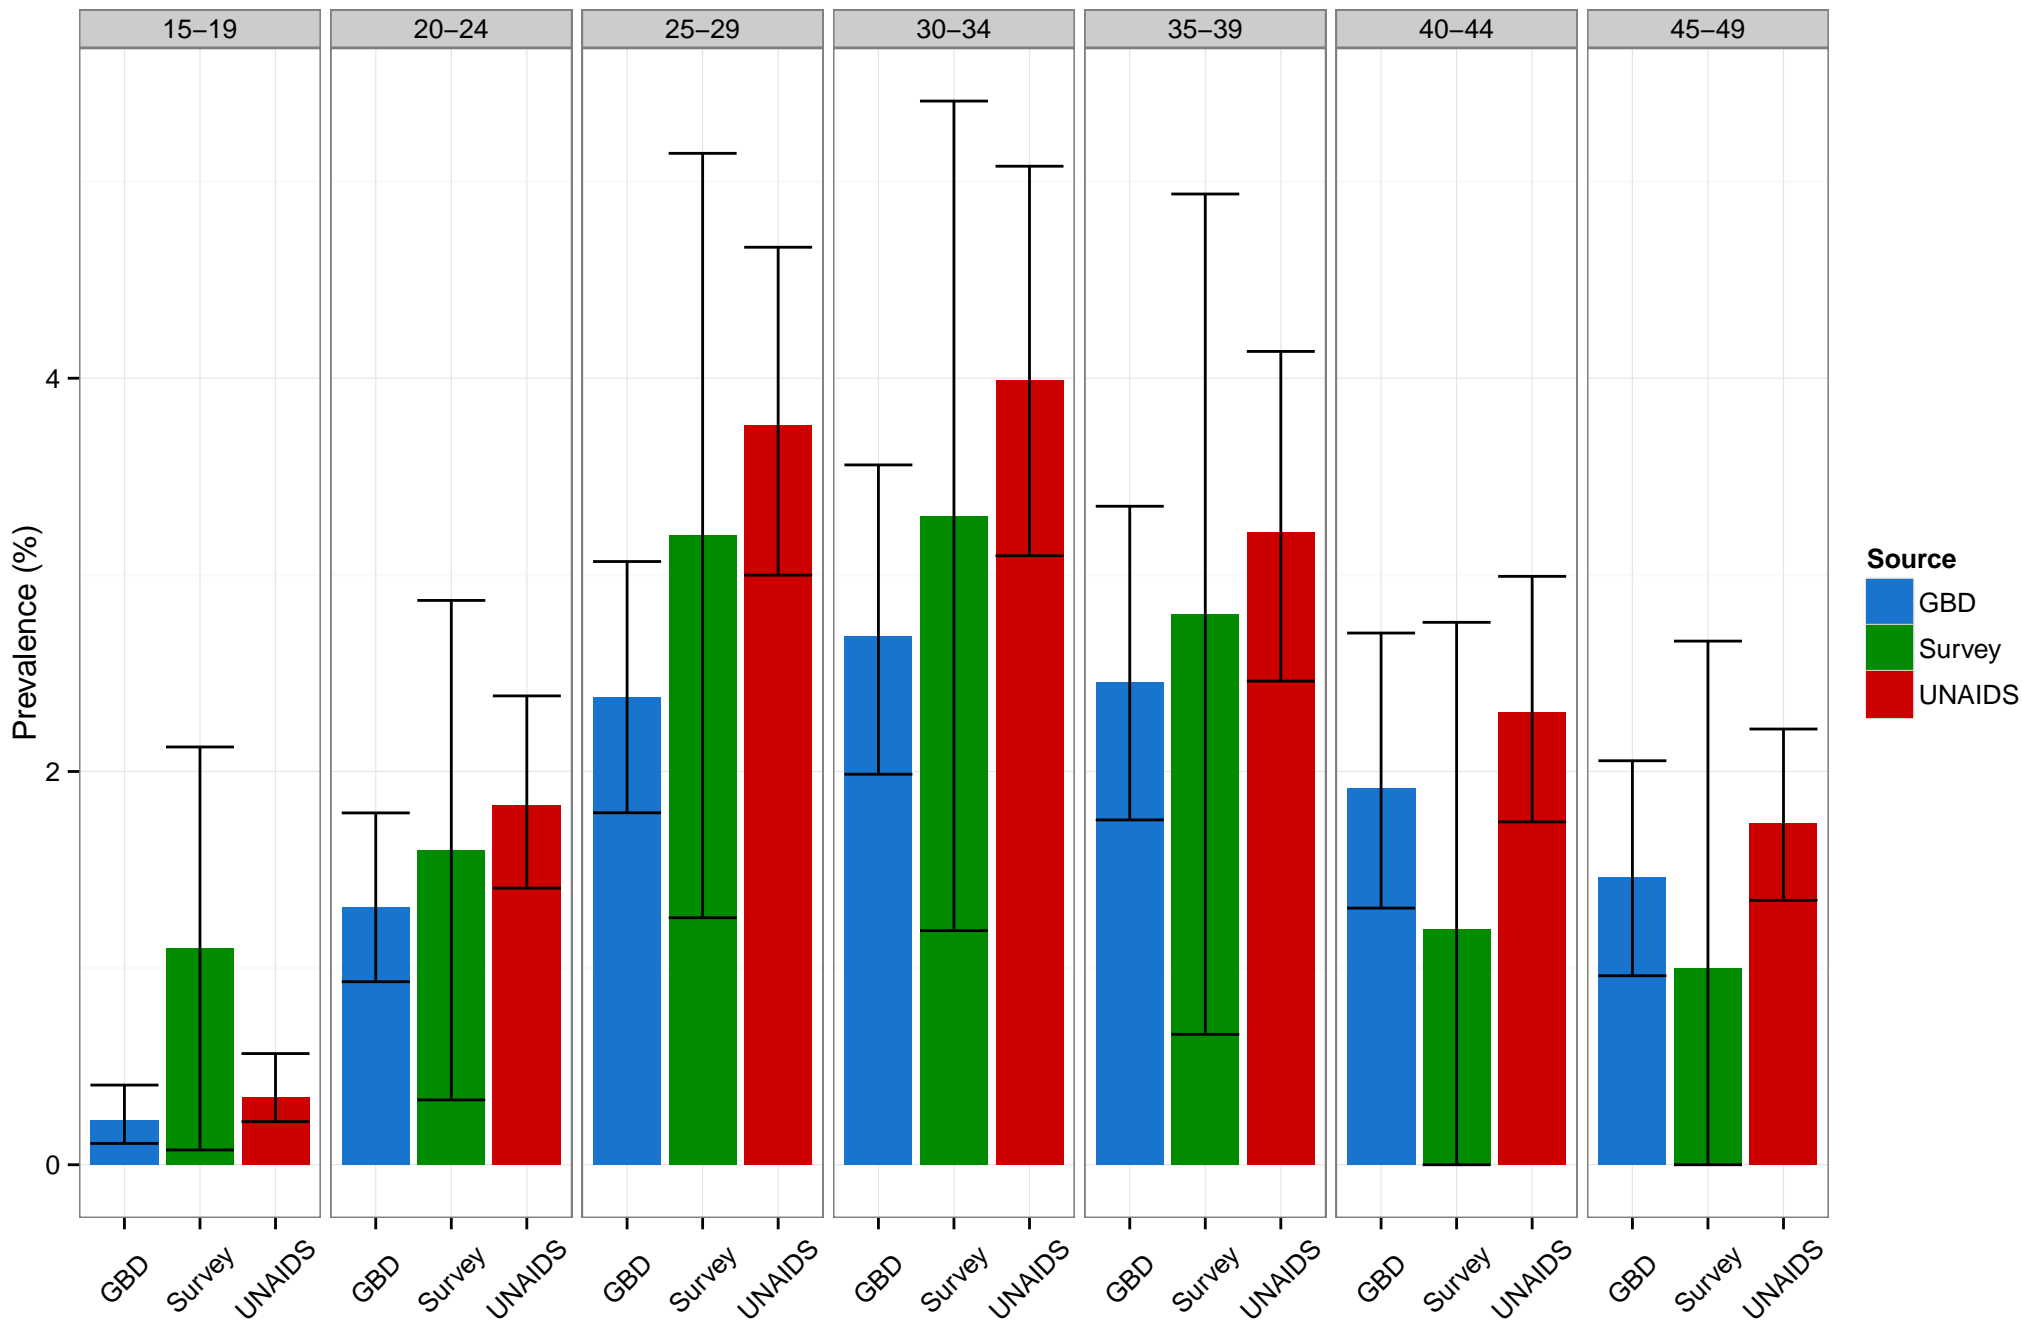

# HIV prevalence comparison to survey estimates by age-group with 95% confidence intervals

MLI 2006 Males

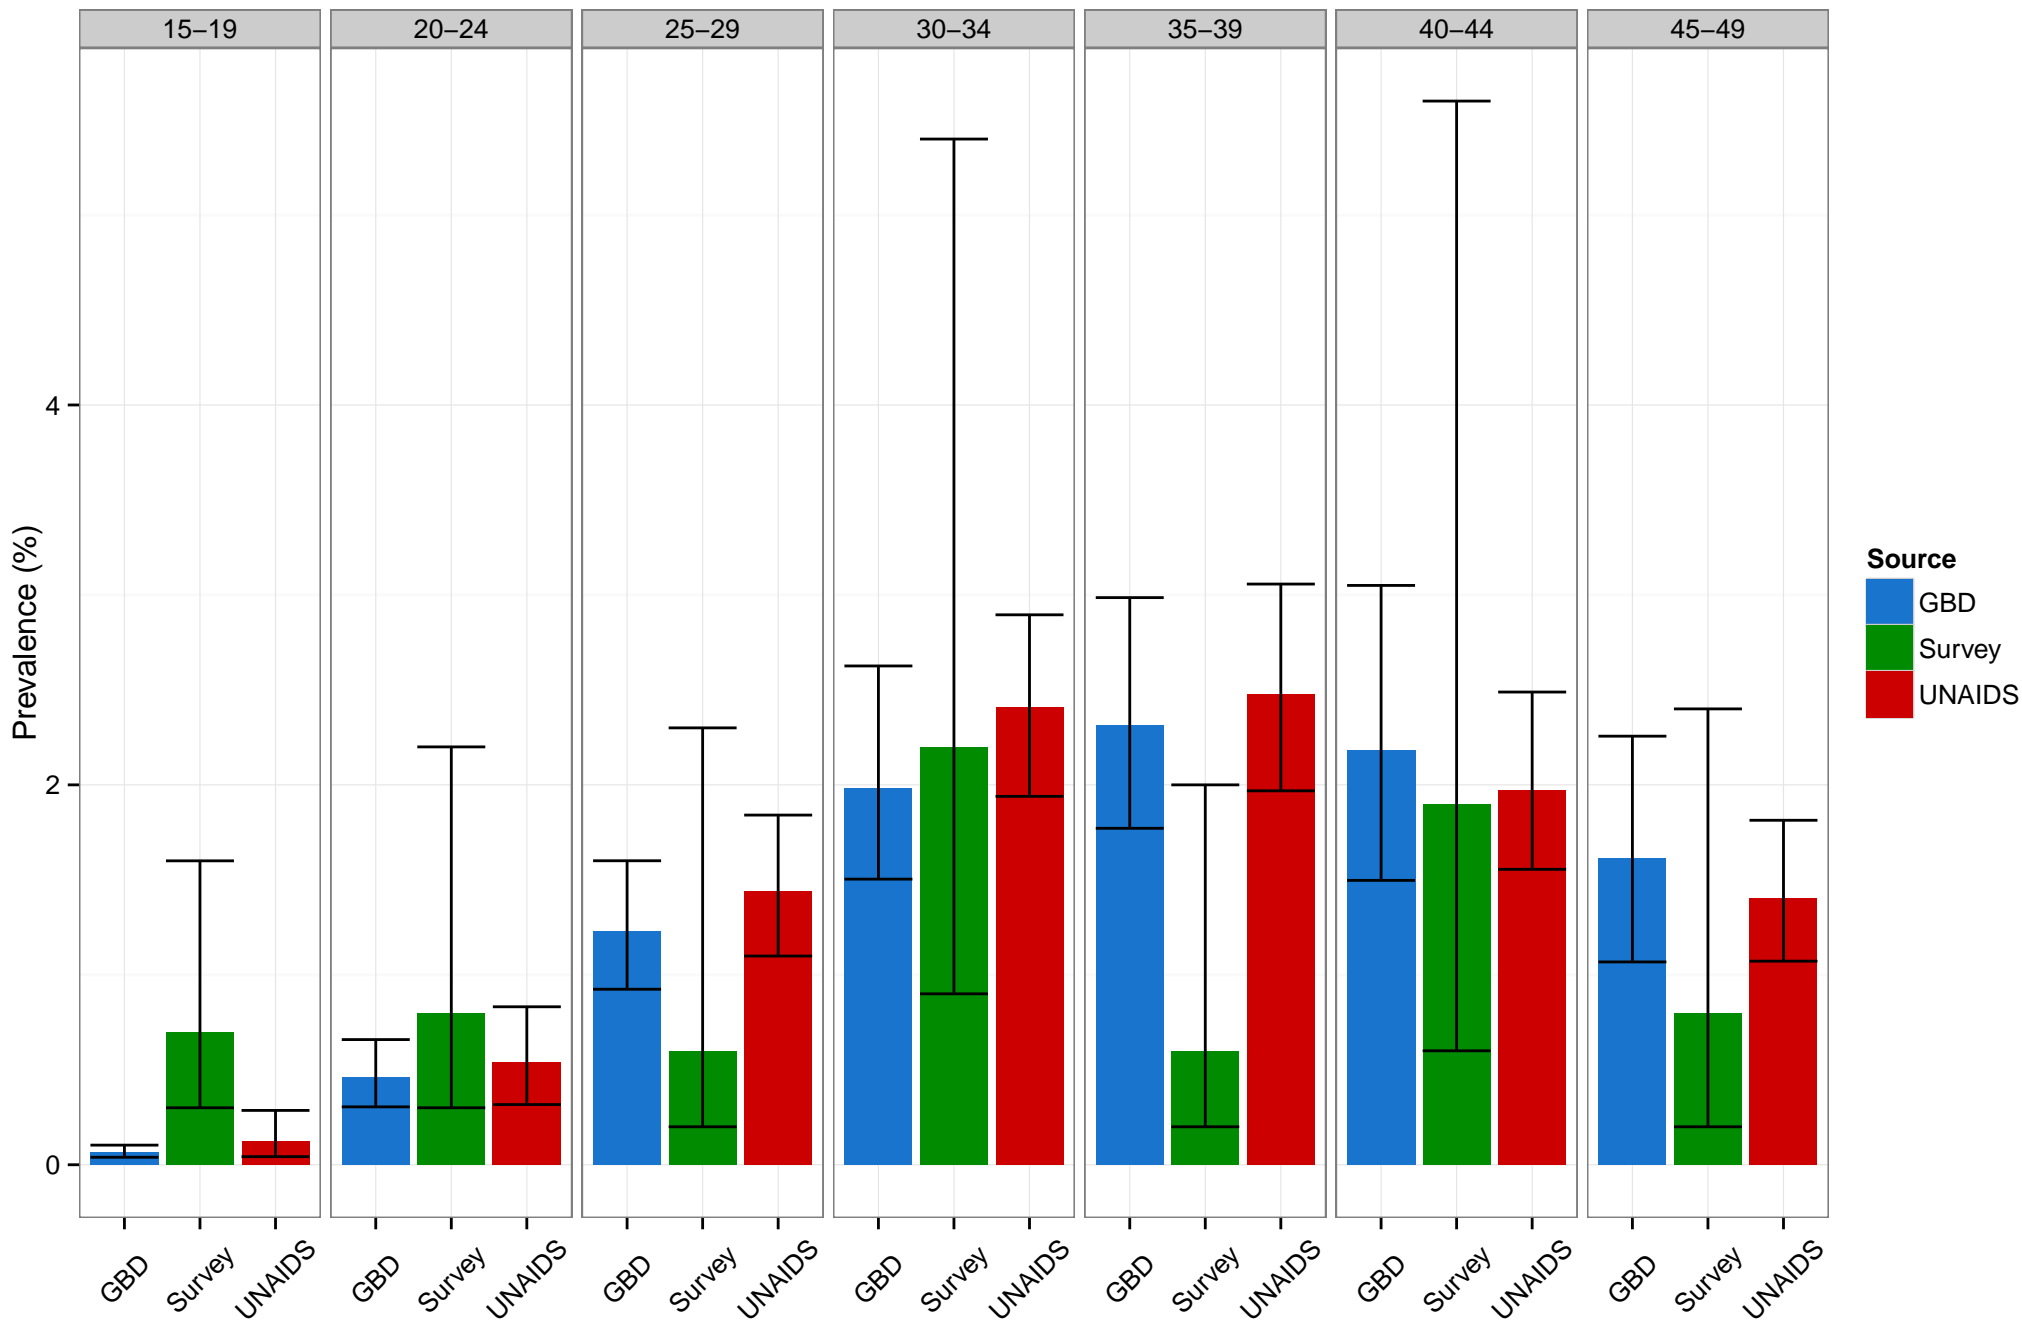

# HIV prevalence comparison to survey estimates by age-group with 95% confidence intervals

MLI 2006 Females

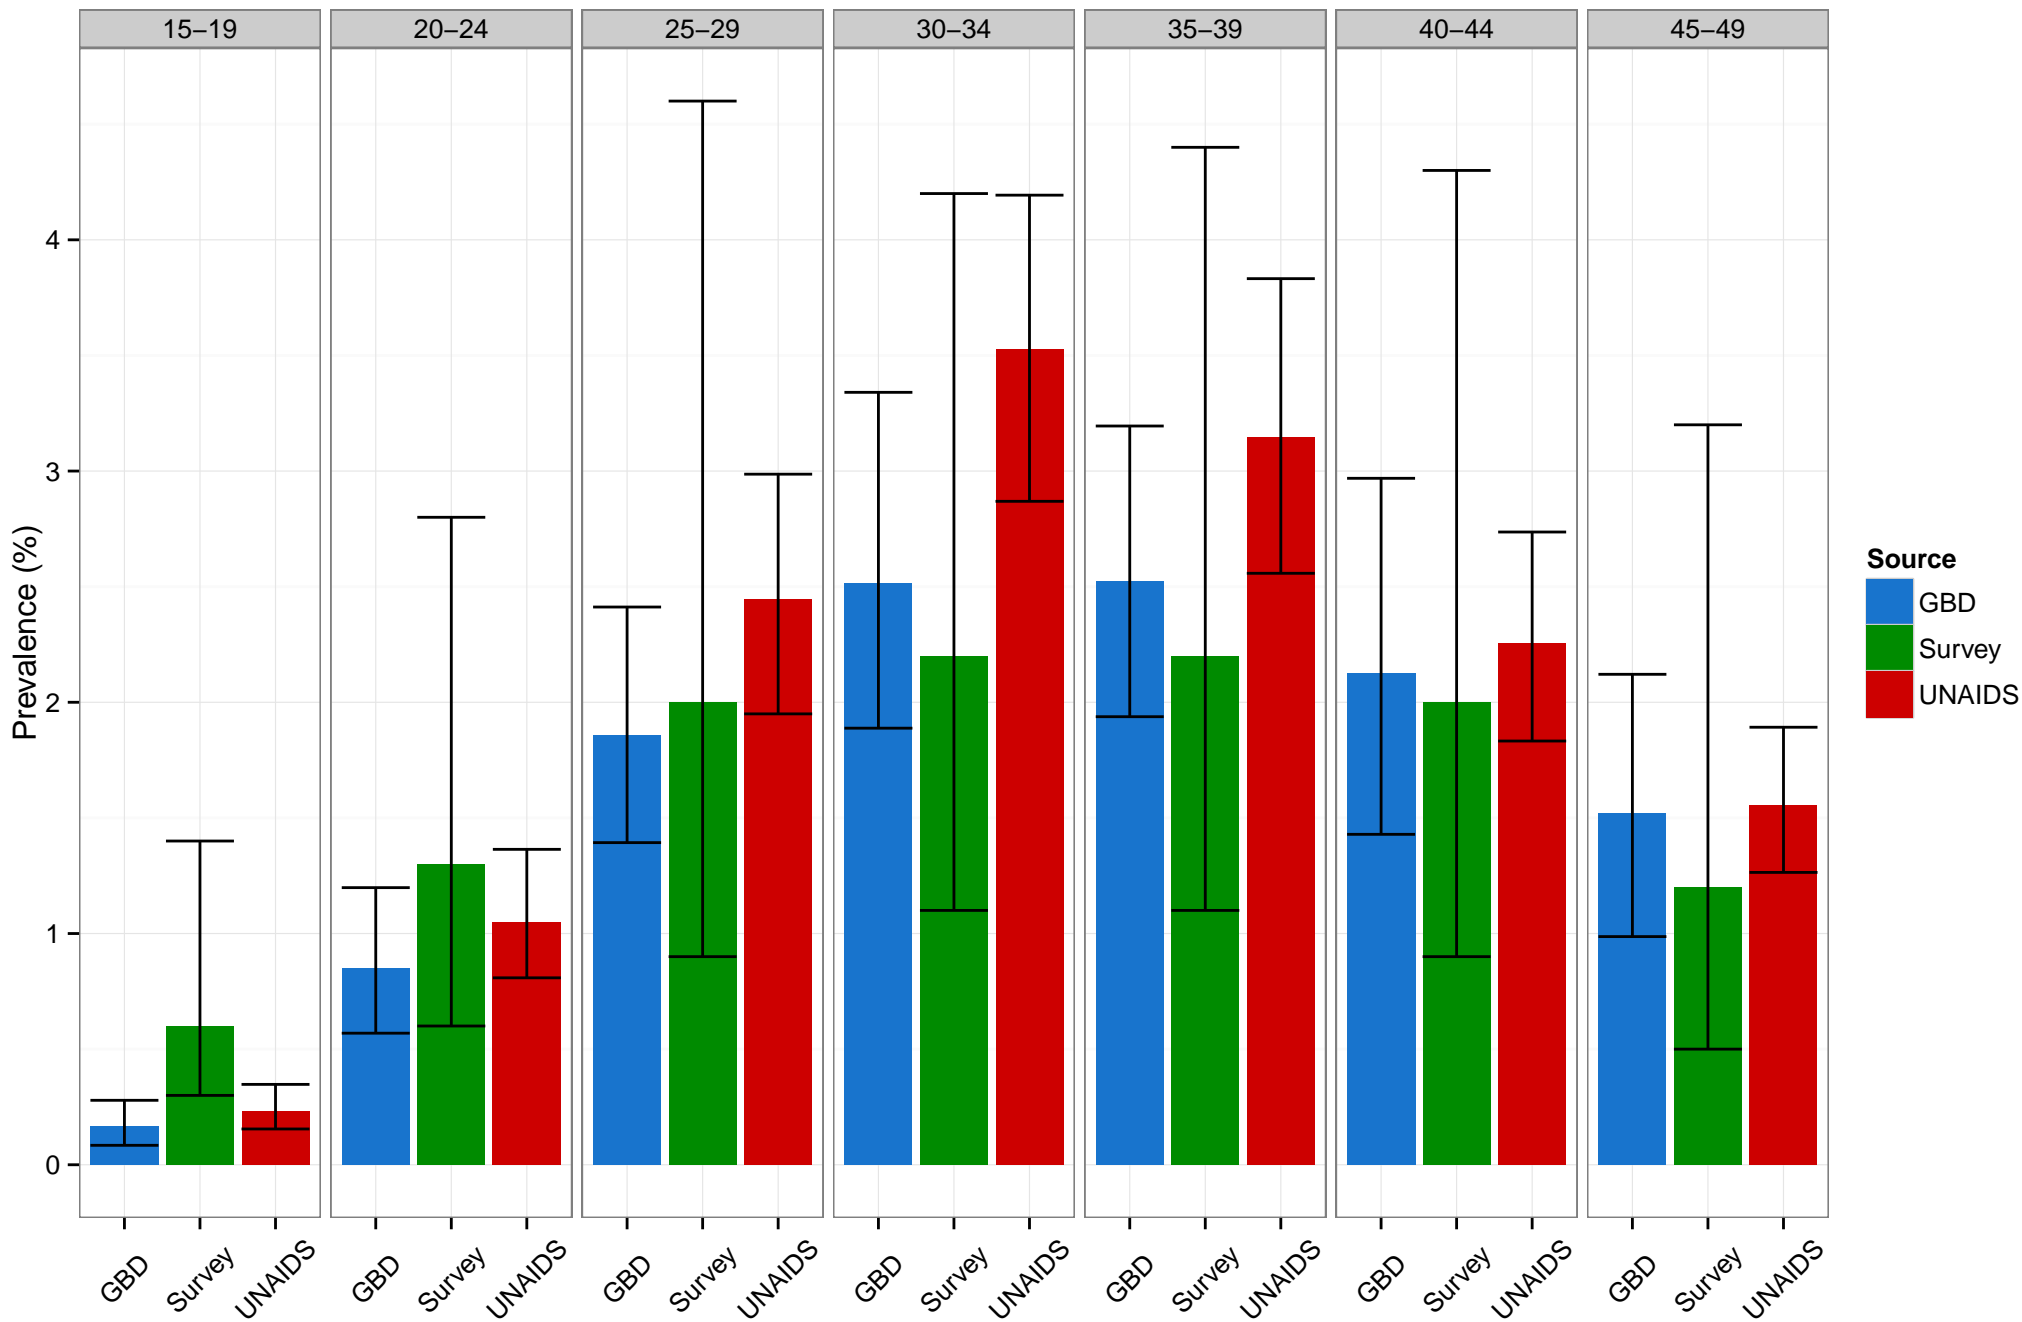



# HIV prevalence comparison to survey estimates by age-group with 95% confidence intervals

MOZ 2009 Males

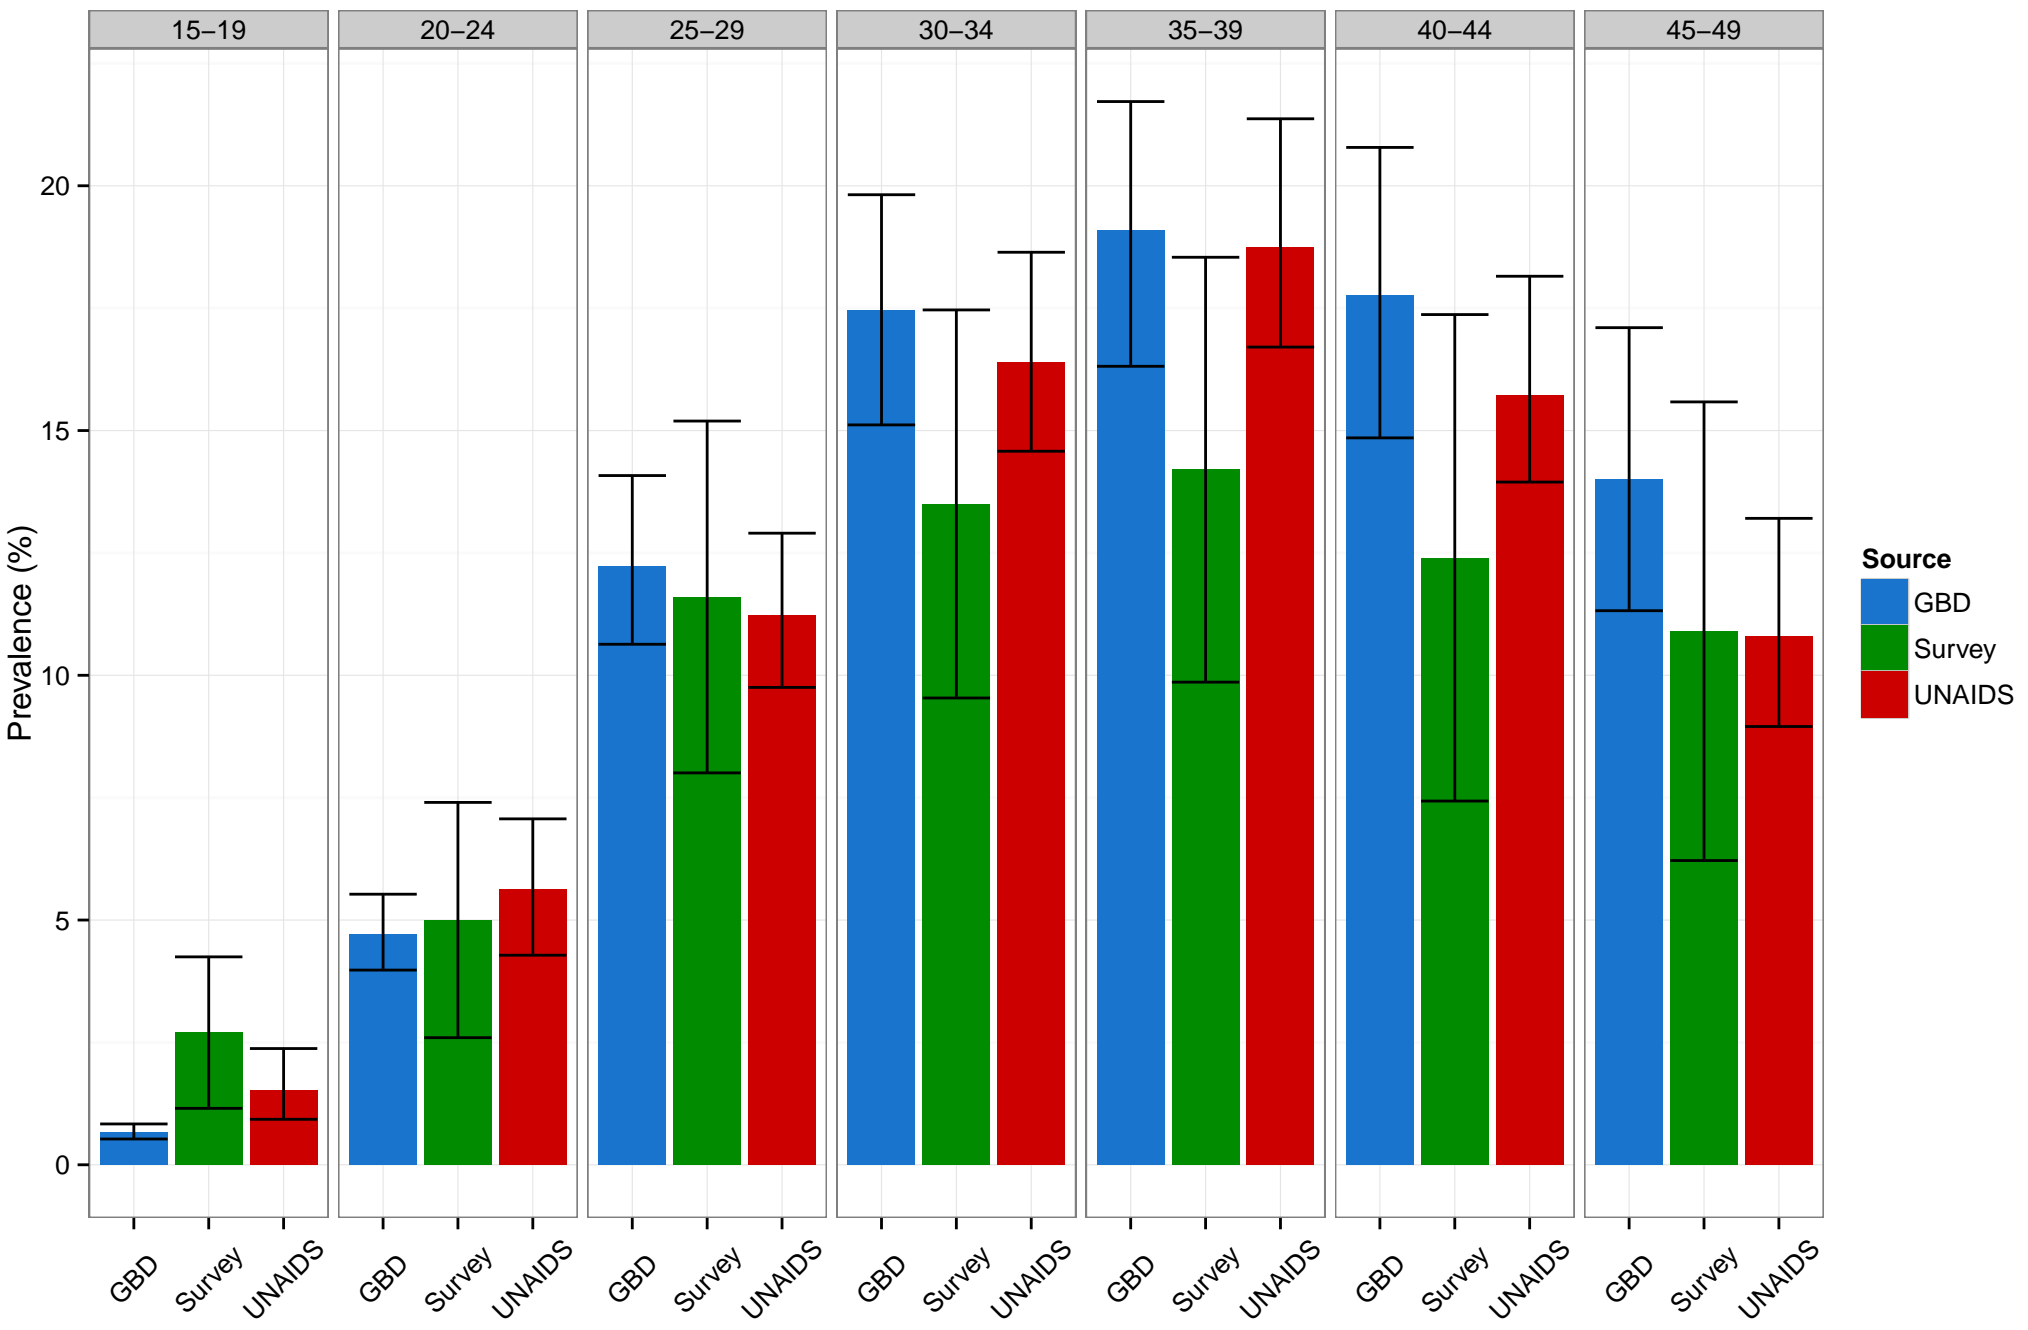

# HIV prevalence comparison to survey estimates by age-group with 95% confidence intervals

MOZ 2009 Females

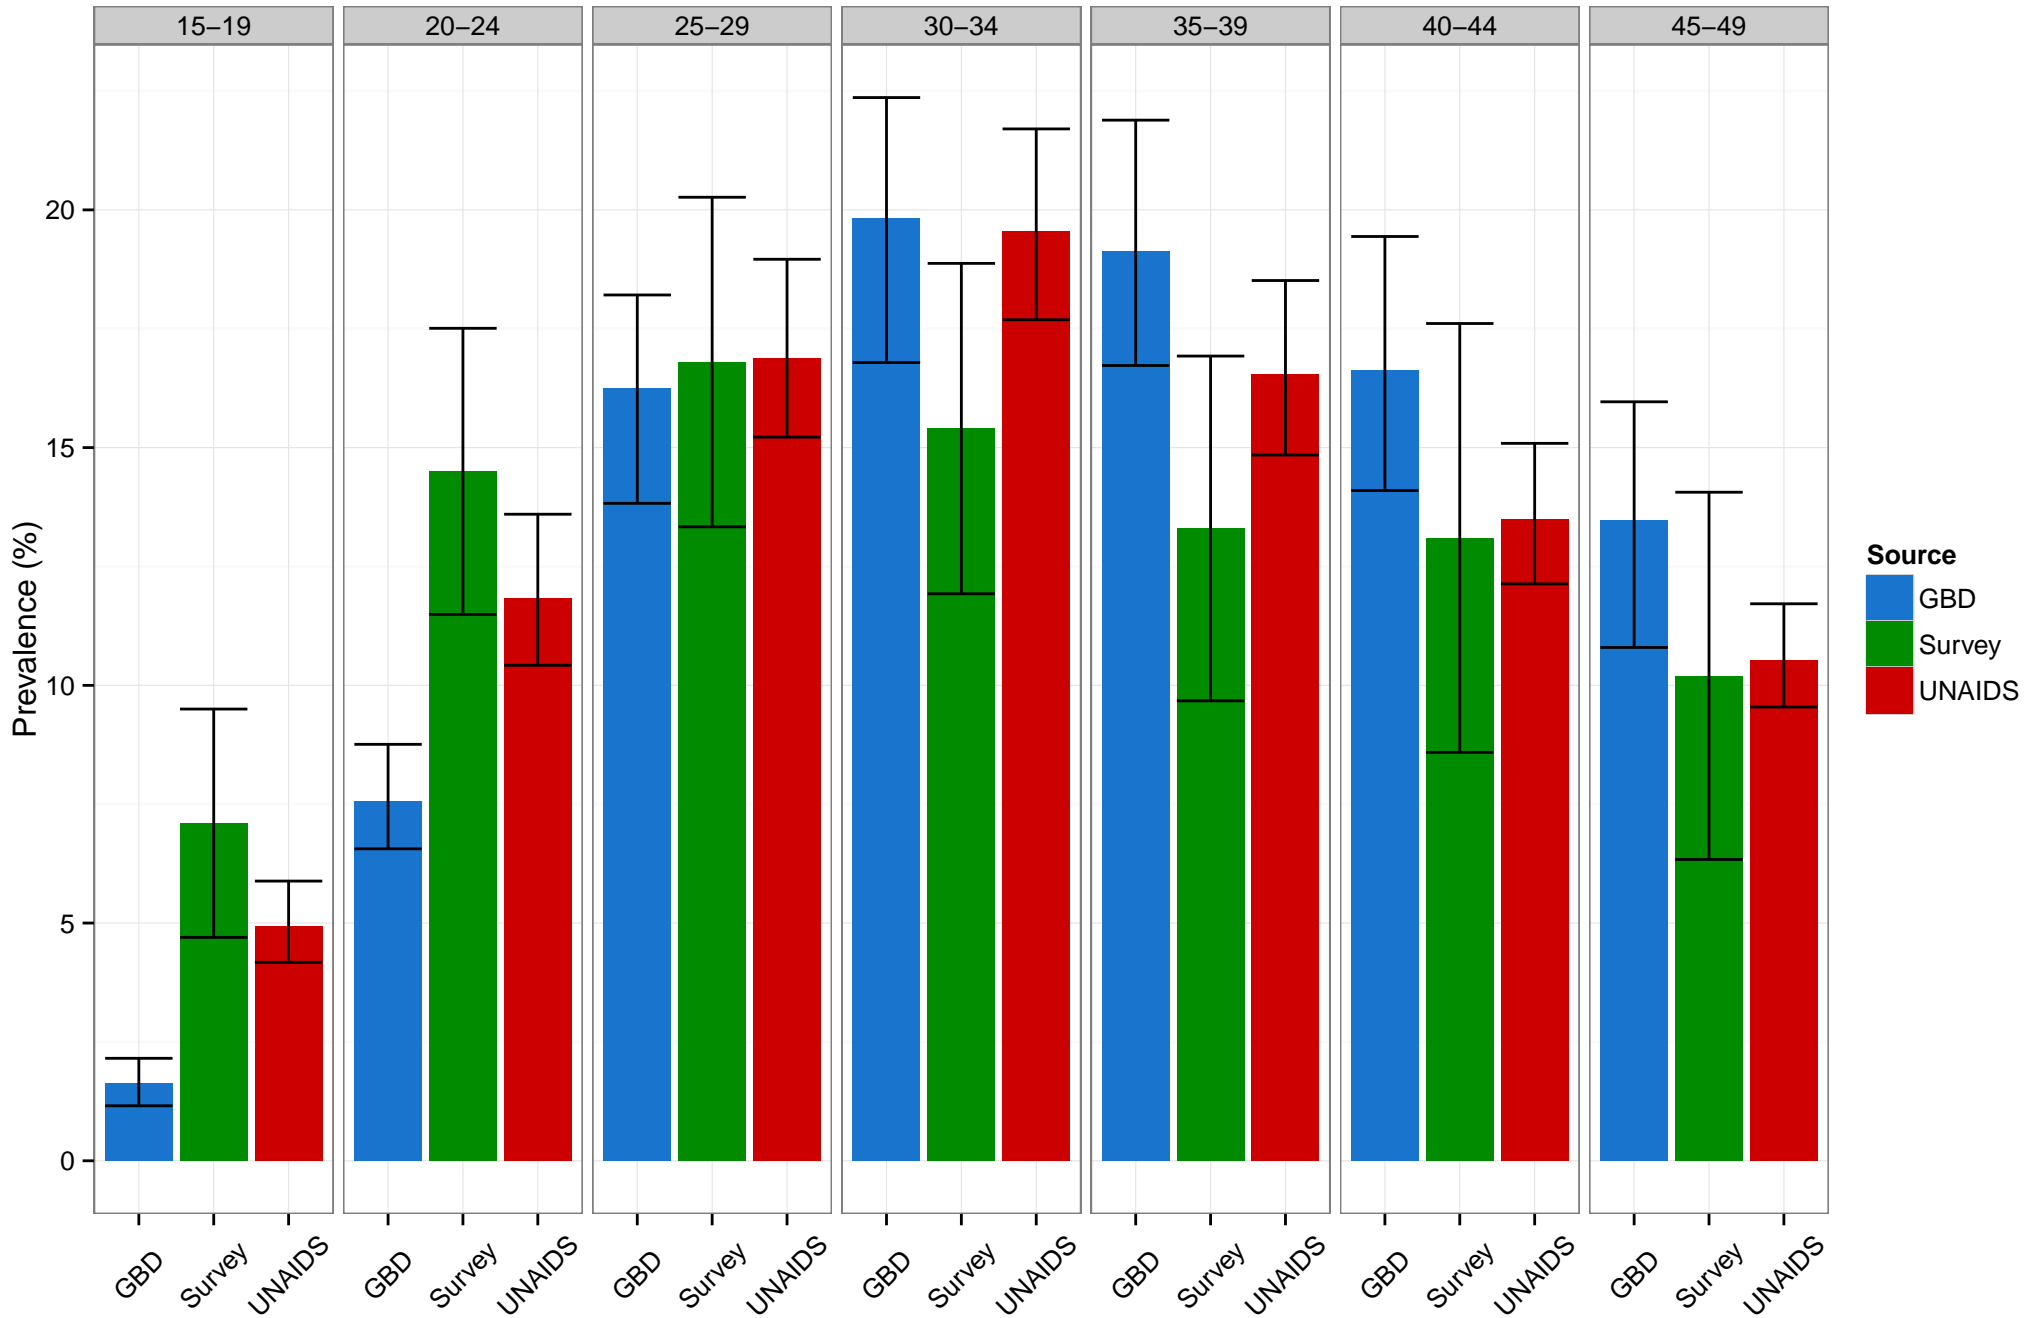

# HIV prevalence comparison to survey estimates by age-group with 95% confidence intervals

MWI 2004 Males

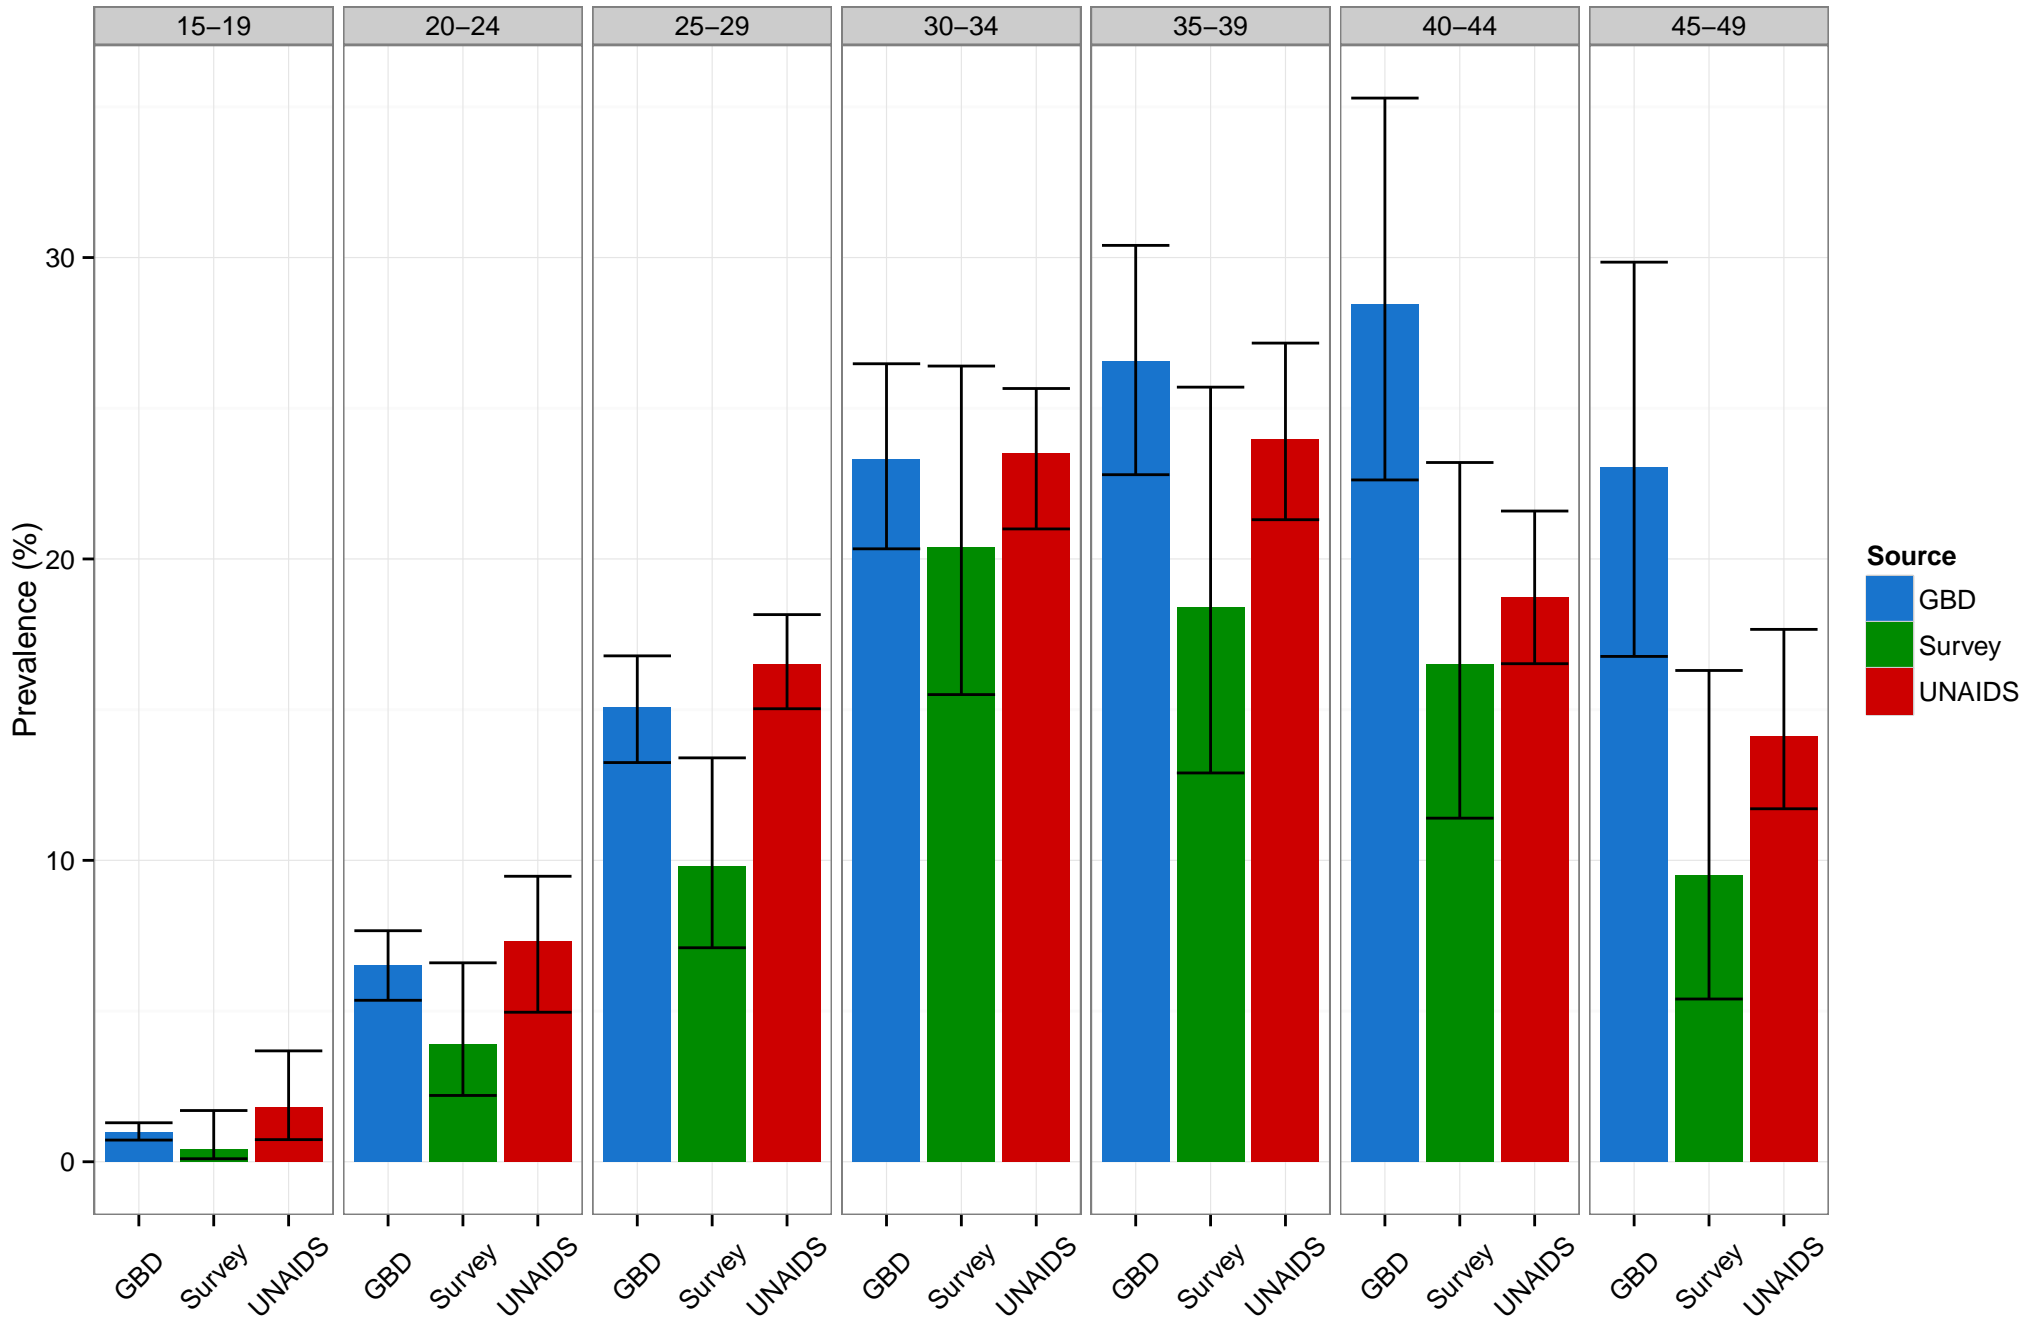

# HIV prevalence comparison to survey estimates by age-group with 95% confidence intervals

MWI 2004 Females

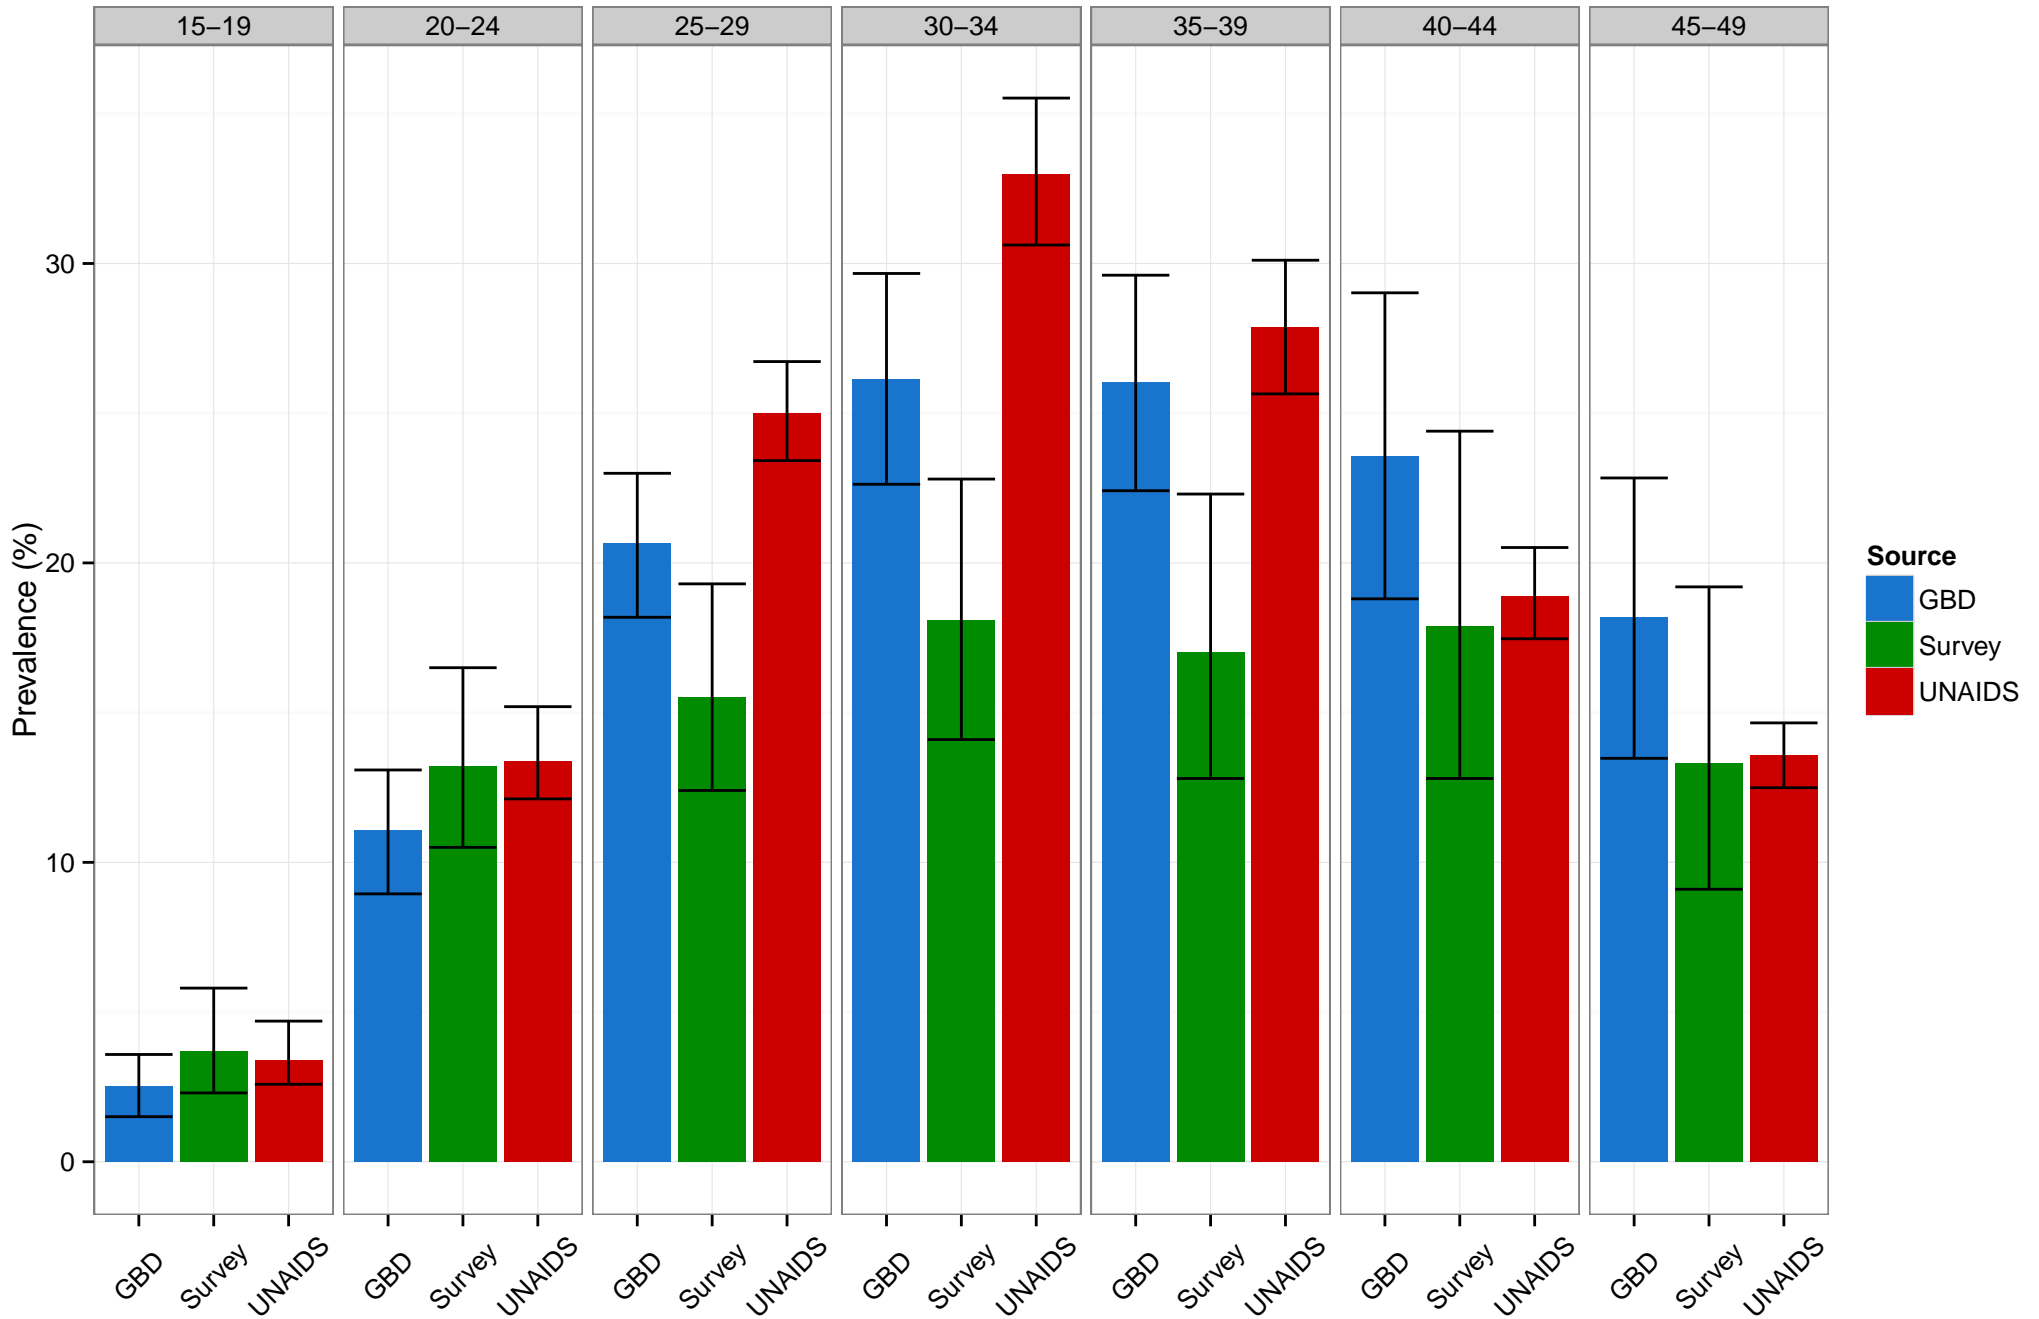

# HIV prevalence comparison to survey estimates by age-group with 95% confidence intervals

MWI 2010 Males

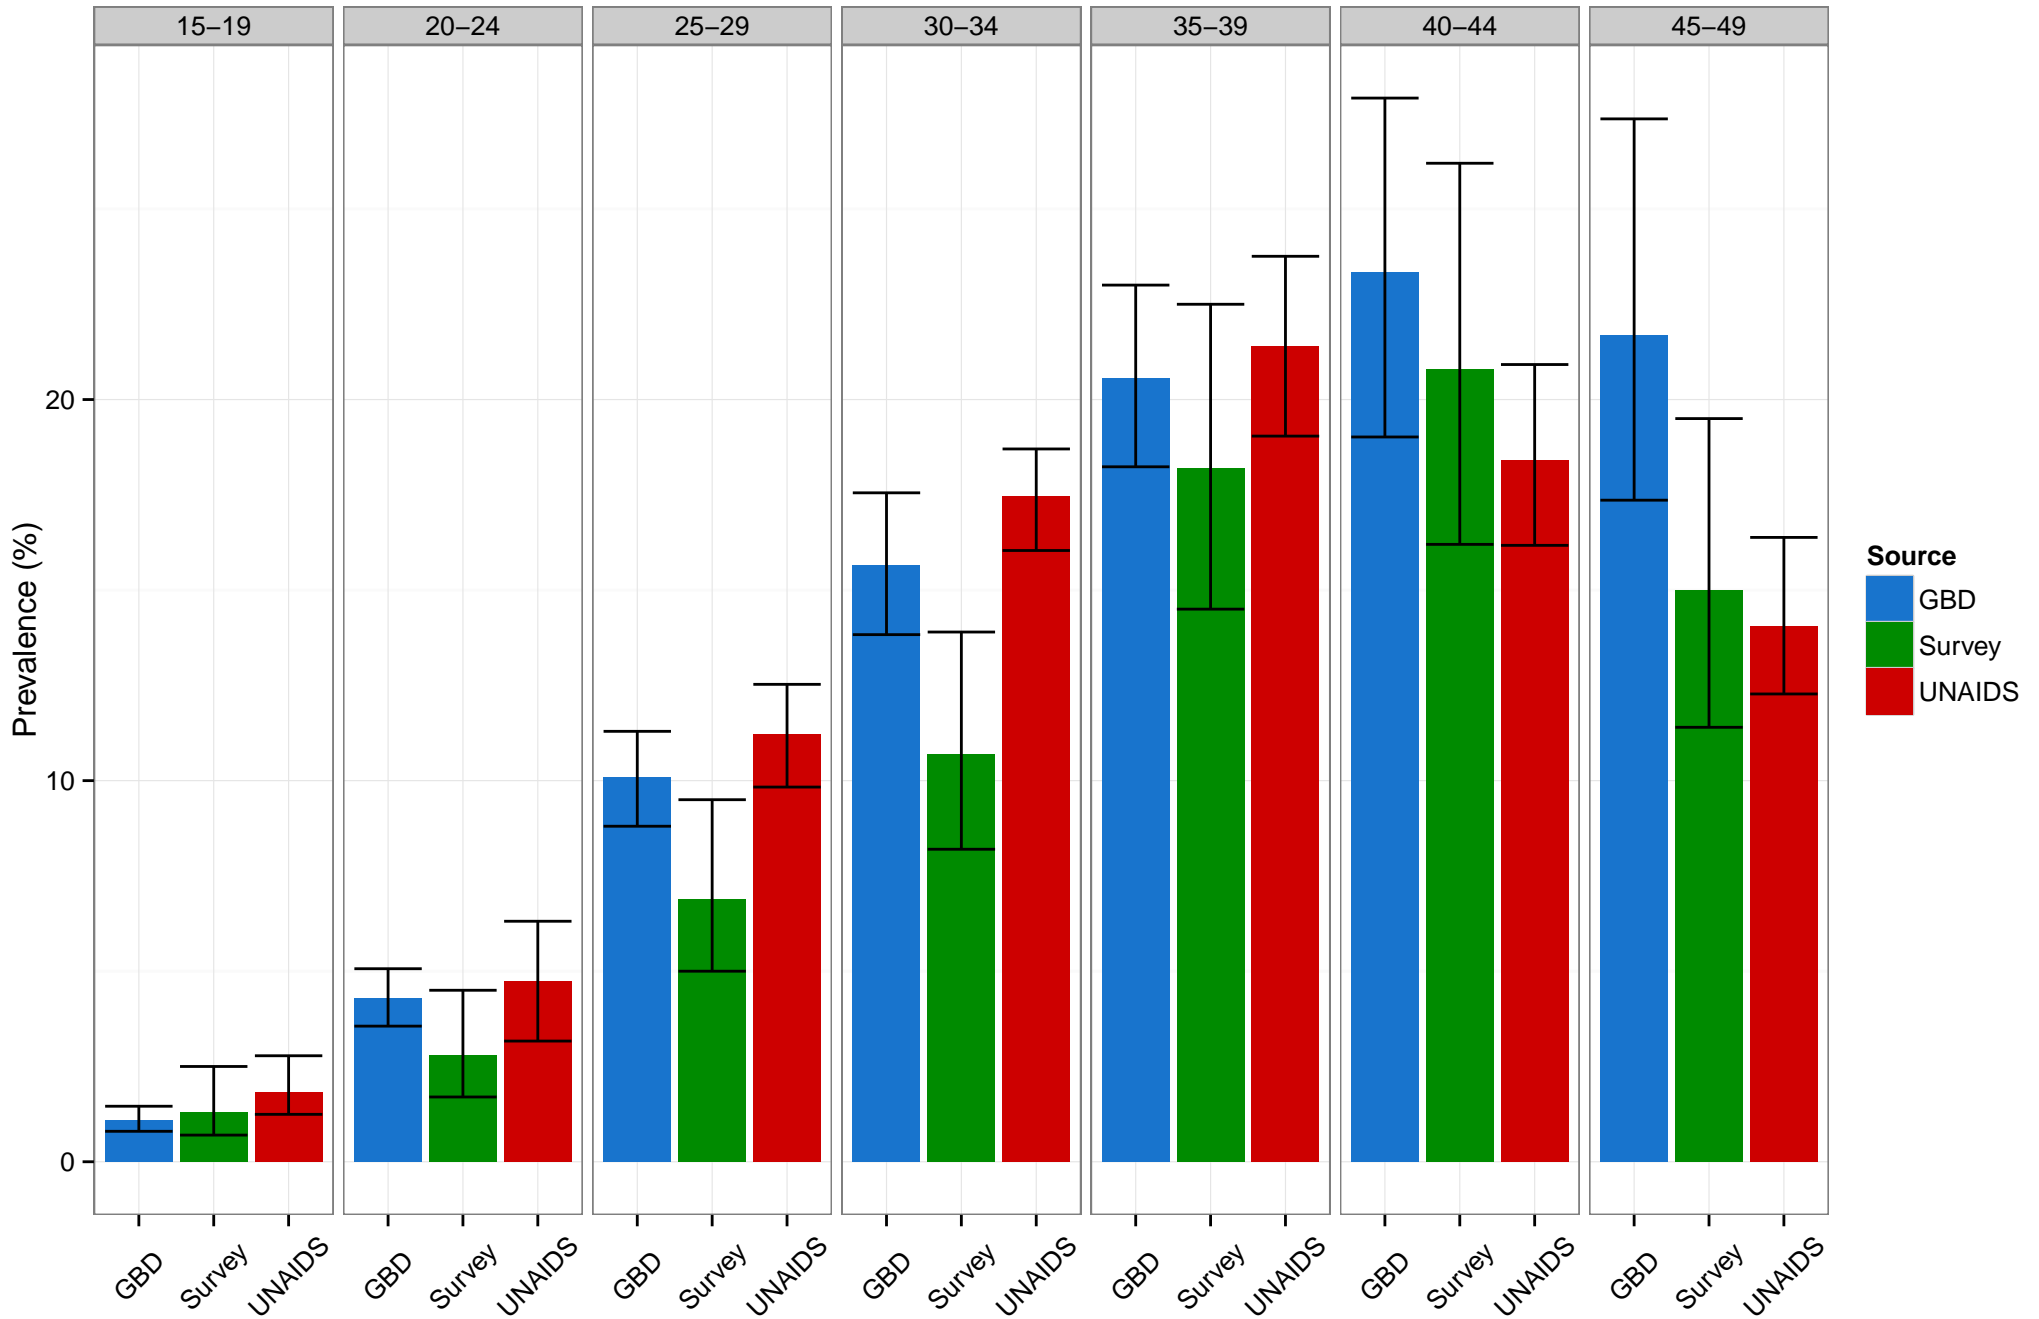

# HIV prevalence comparison to survey estimates by age-group with 95% confidence intervals

MWI 2010 Females

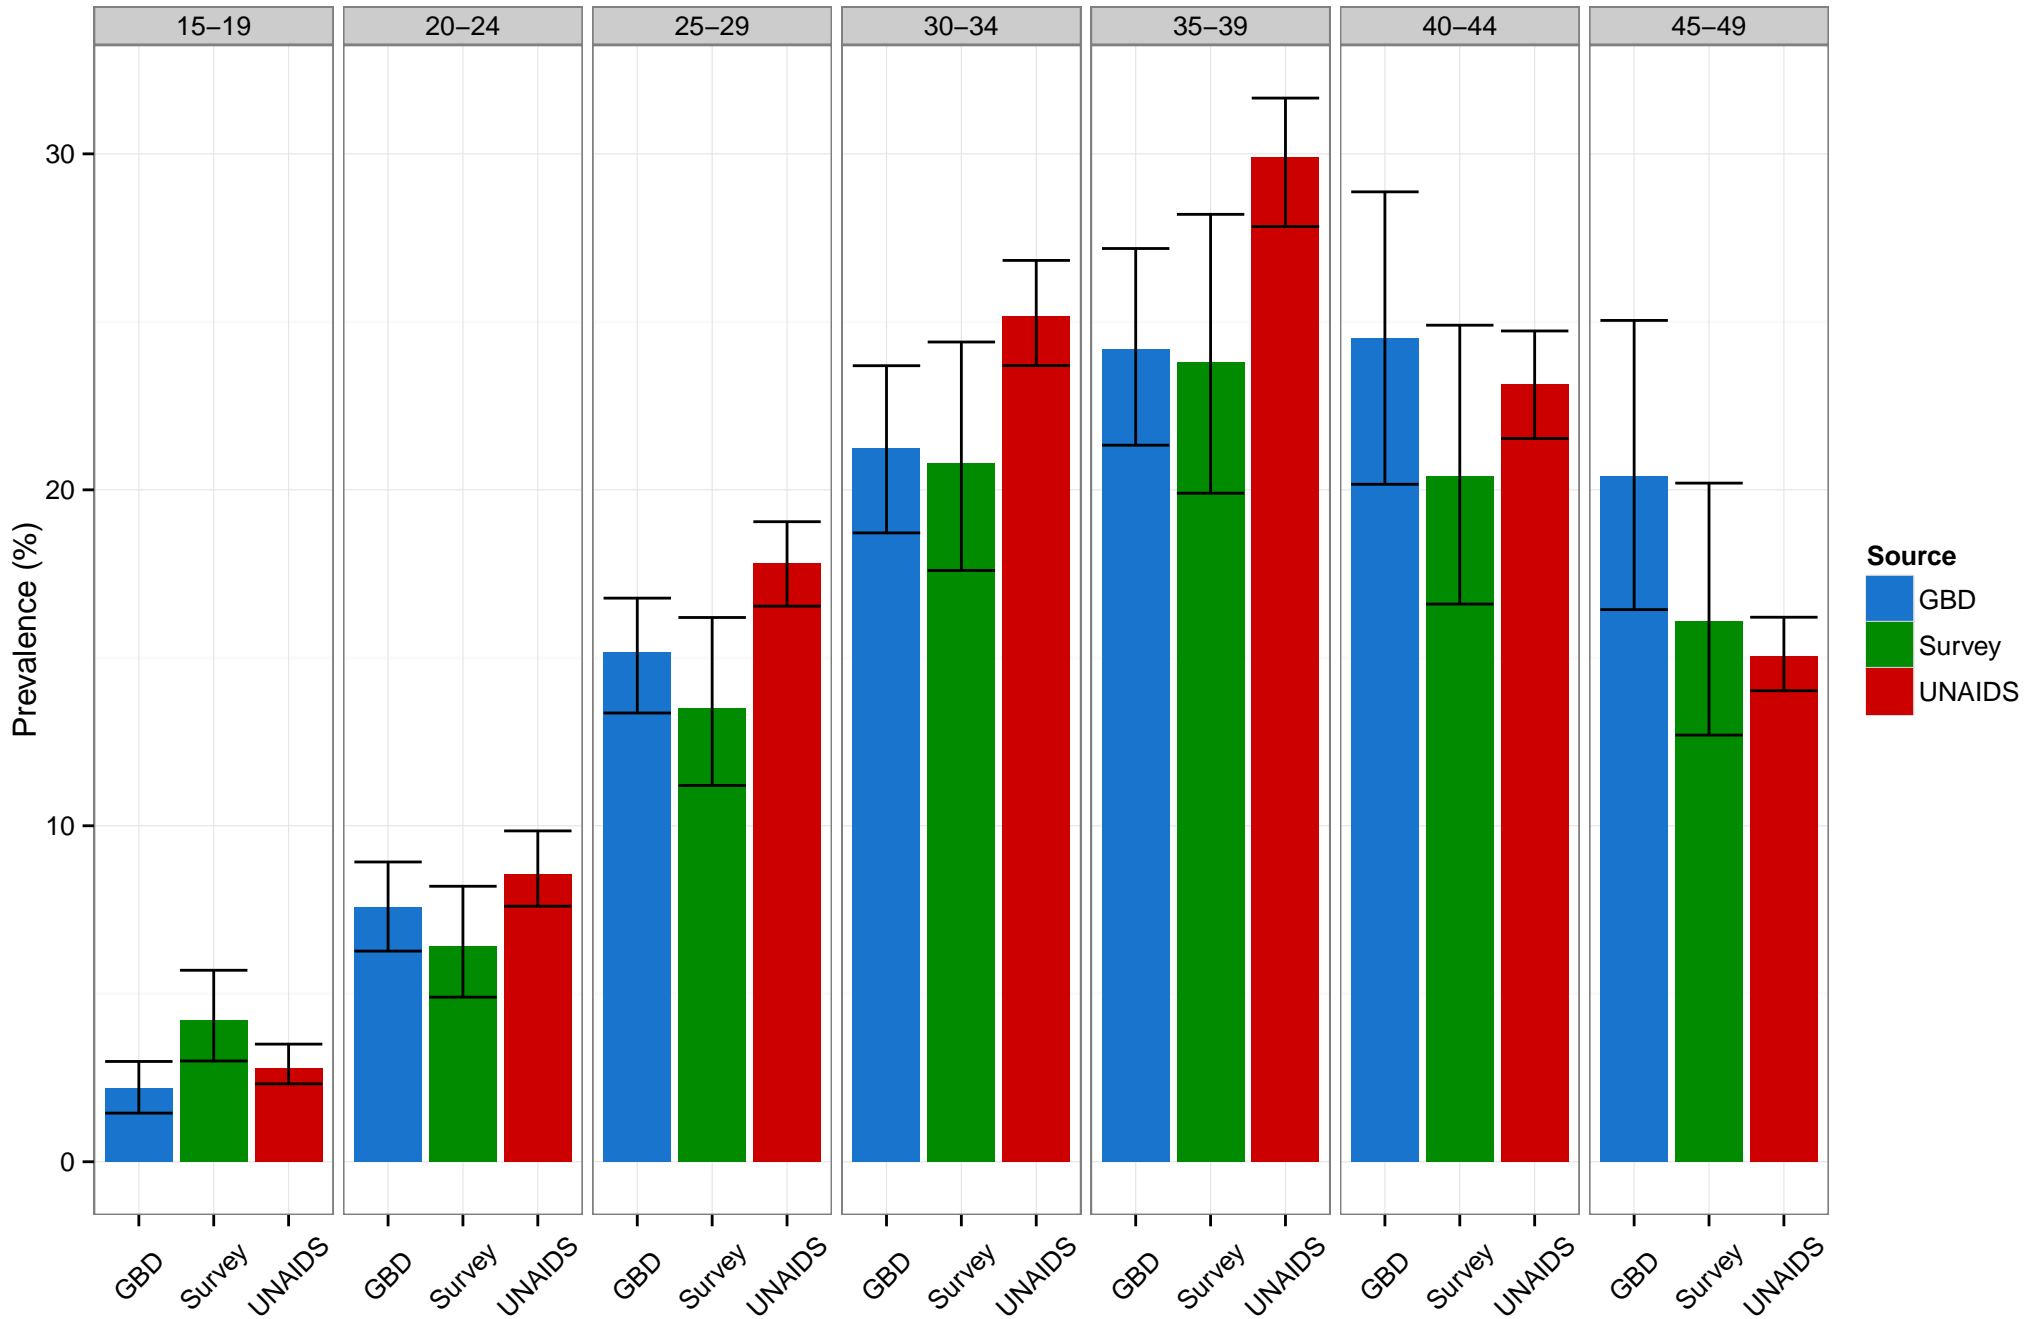

# HIV prevalence comparison to survey estimates by age-group with 95% confidence intervals

NER 2006 Males

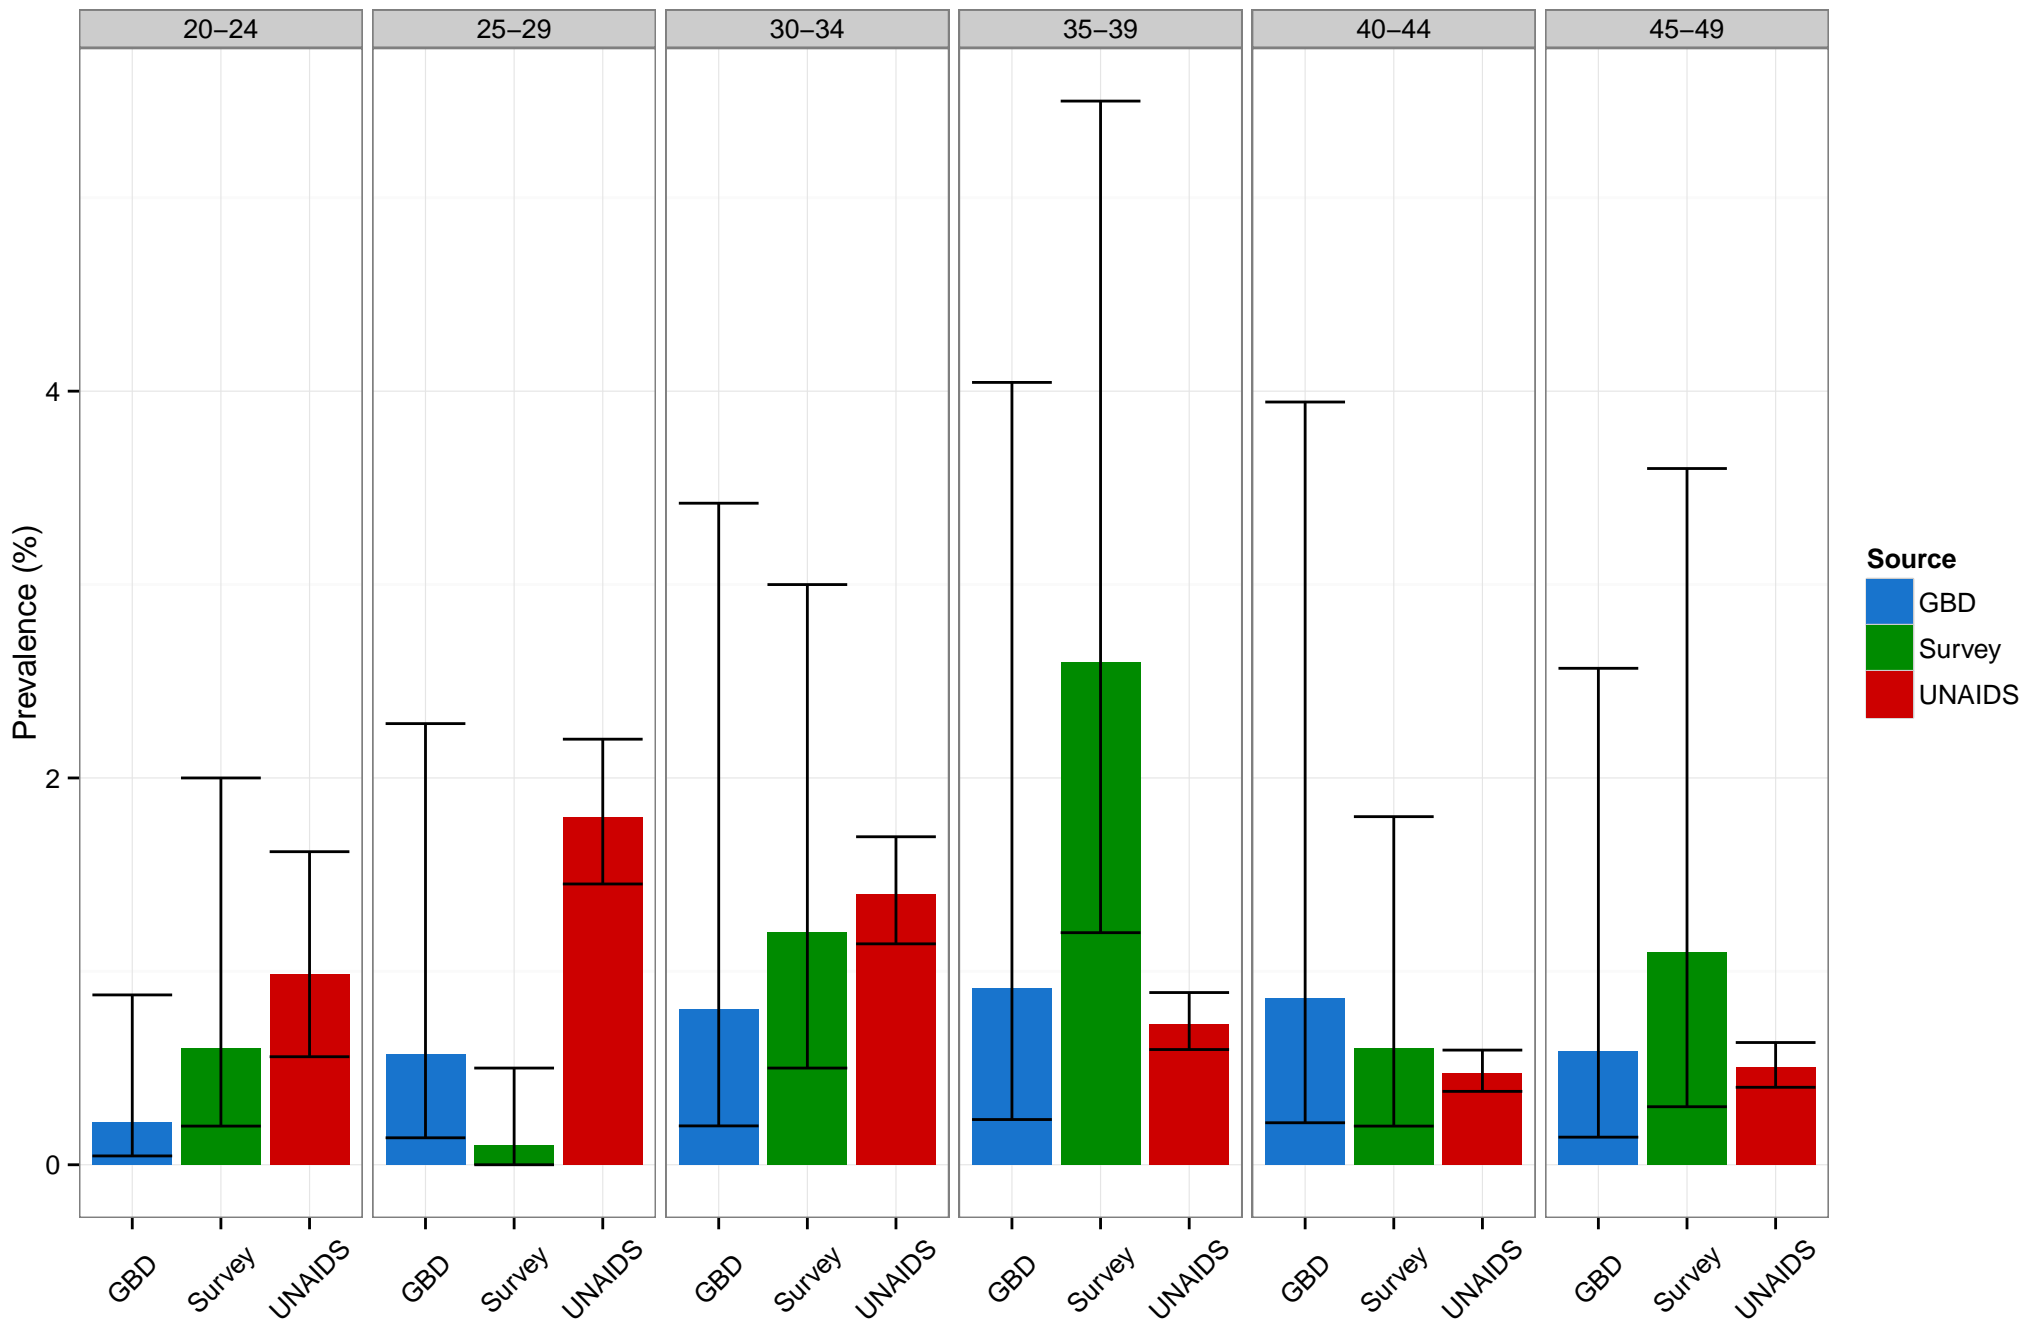

# HIV prevalence comparison to survey estimates by age-group with 95% confidence intervals

NER 2006 Females

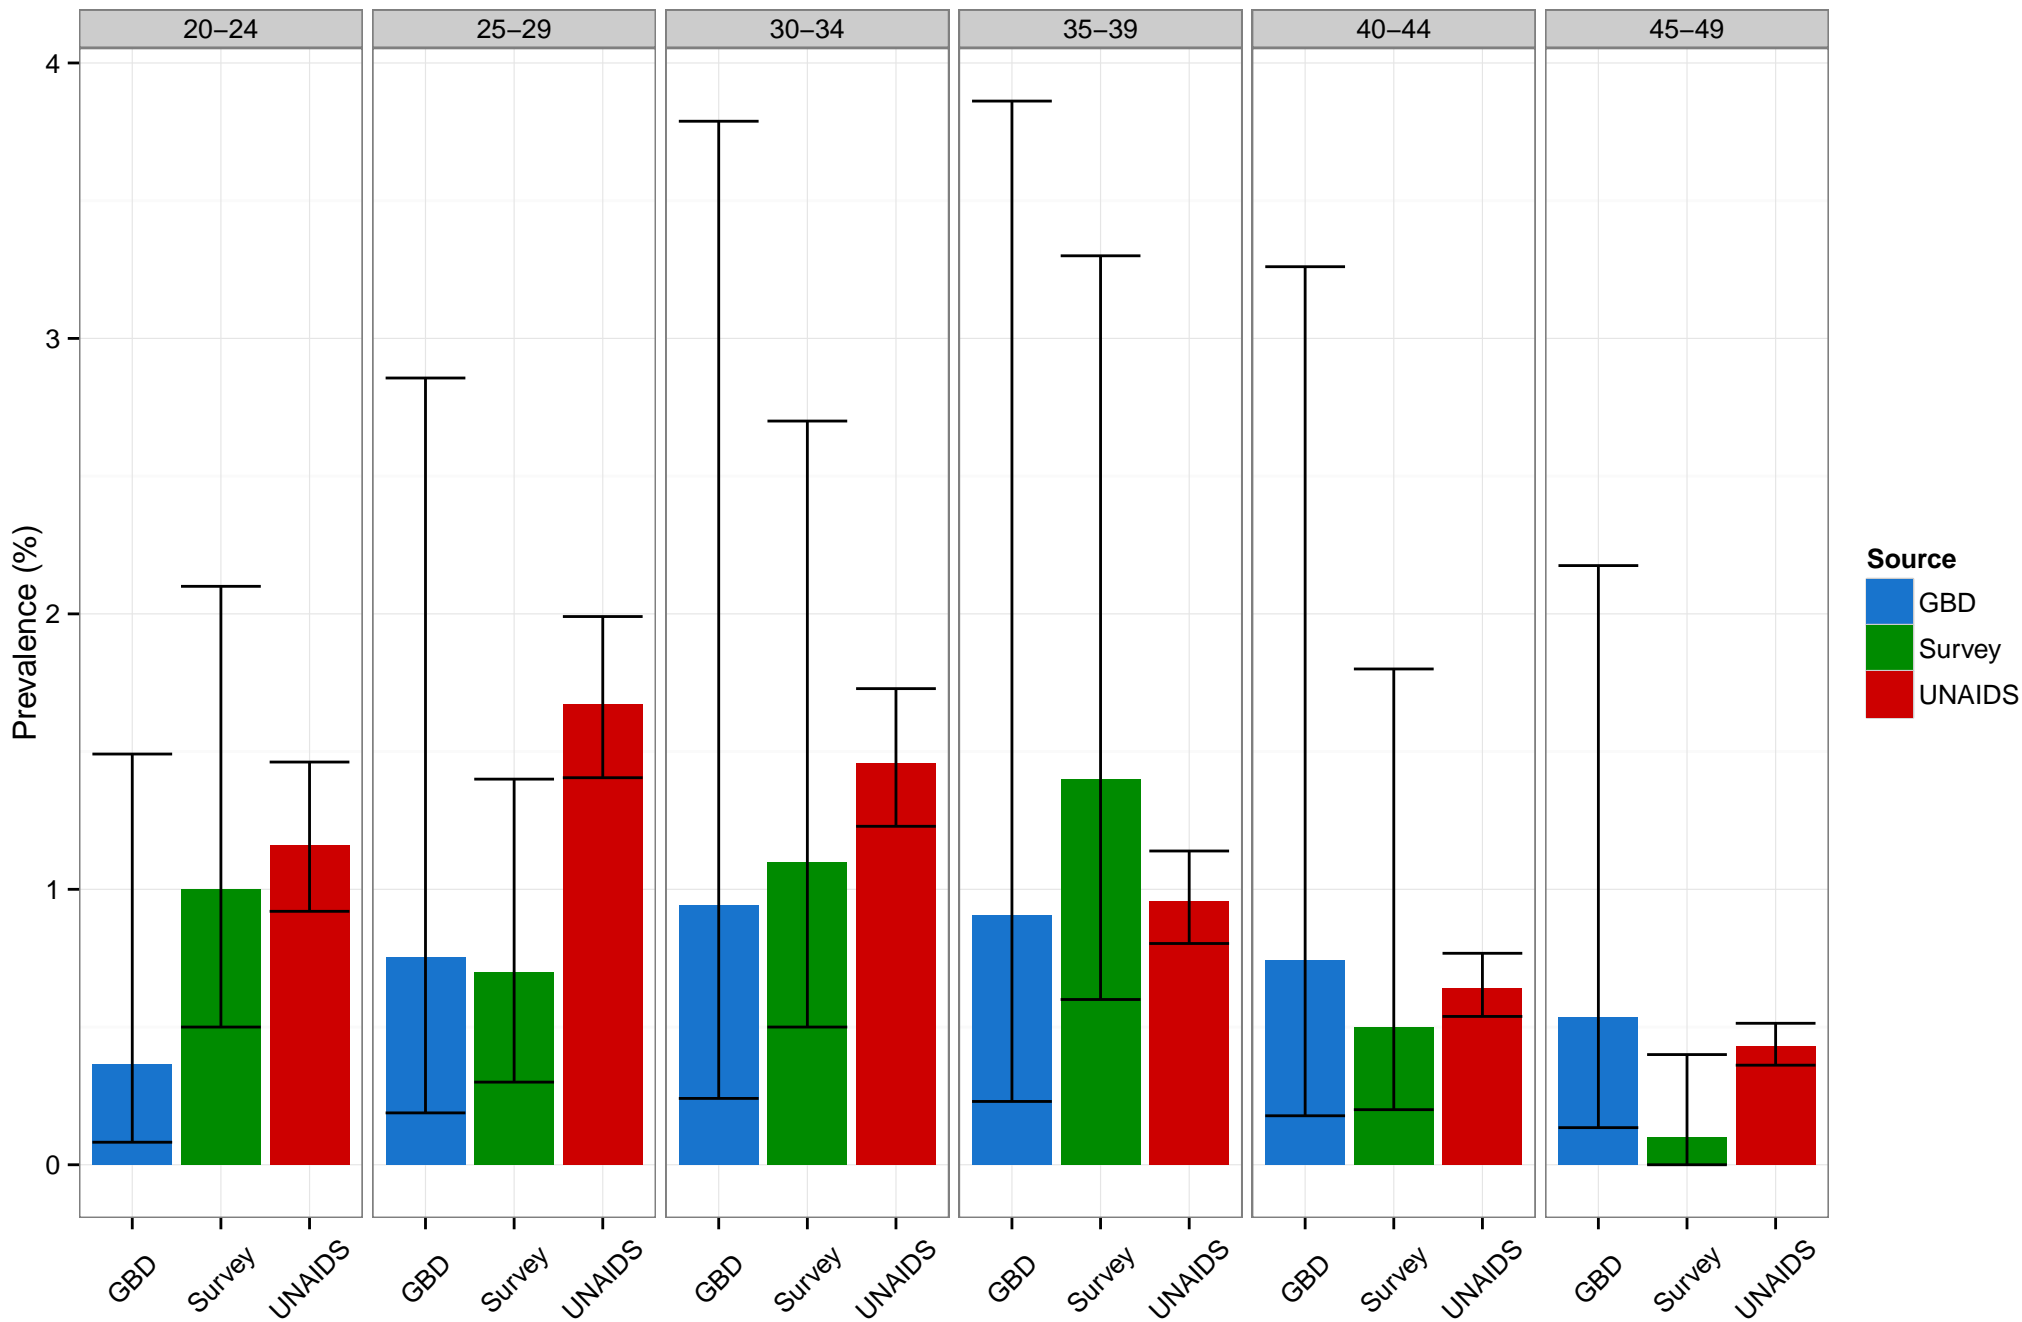



# HIV prevalence comparison to survey estimates by age-group with 95% confidence intervals

NER 2012 Males

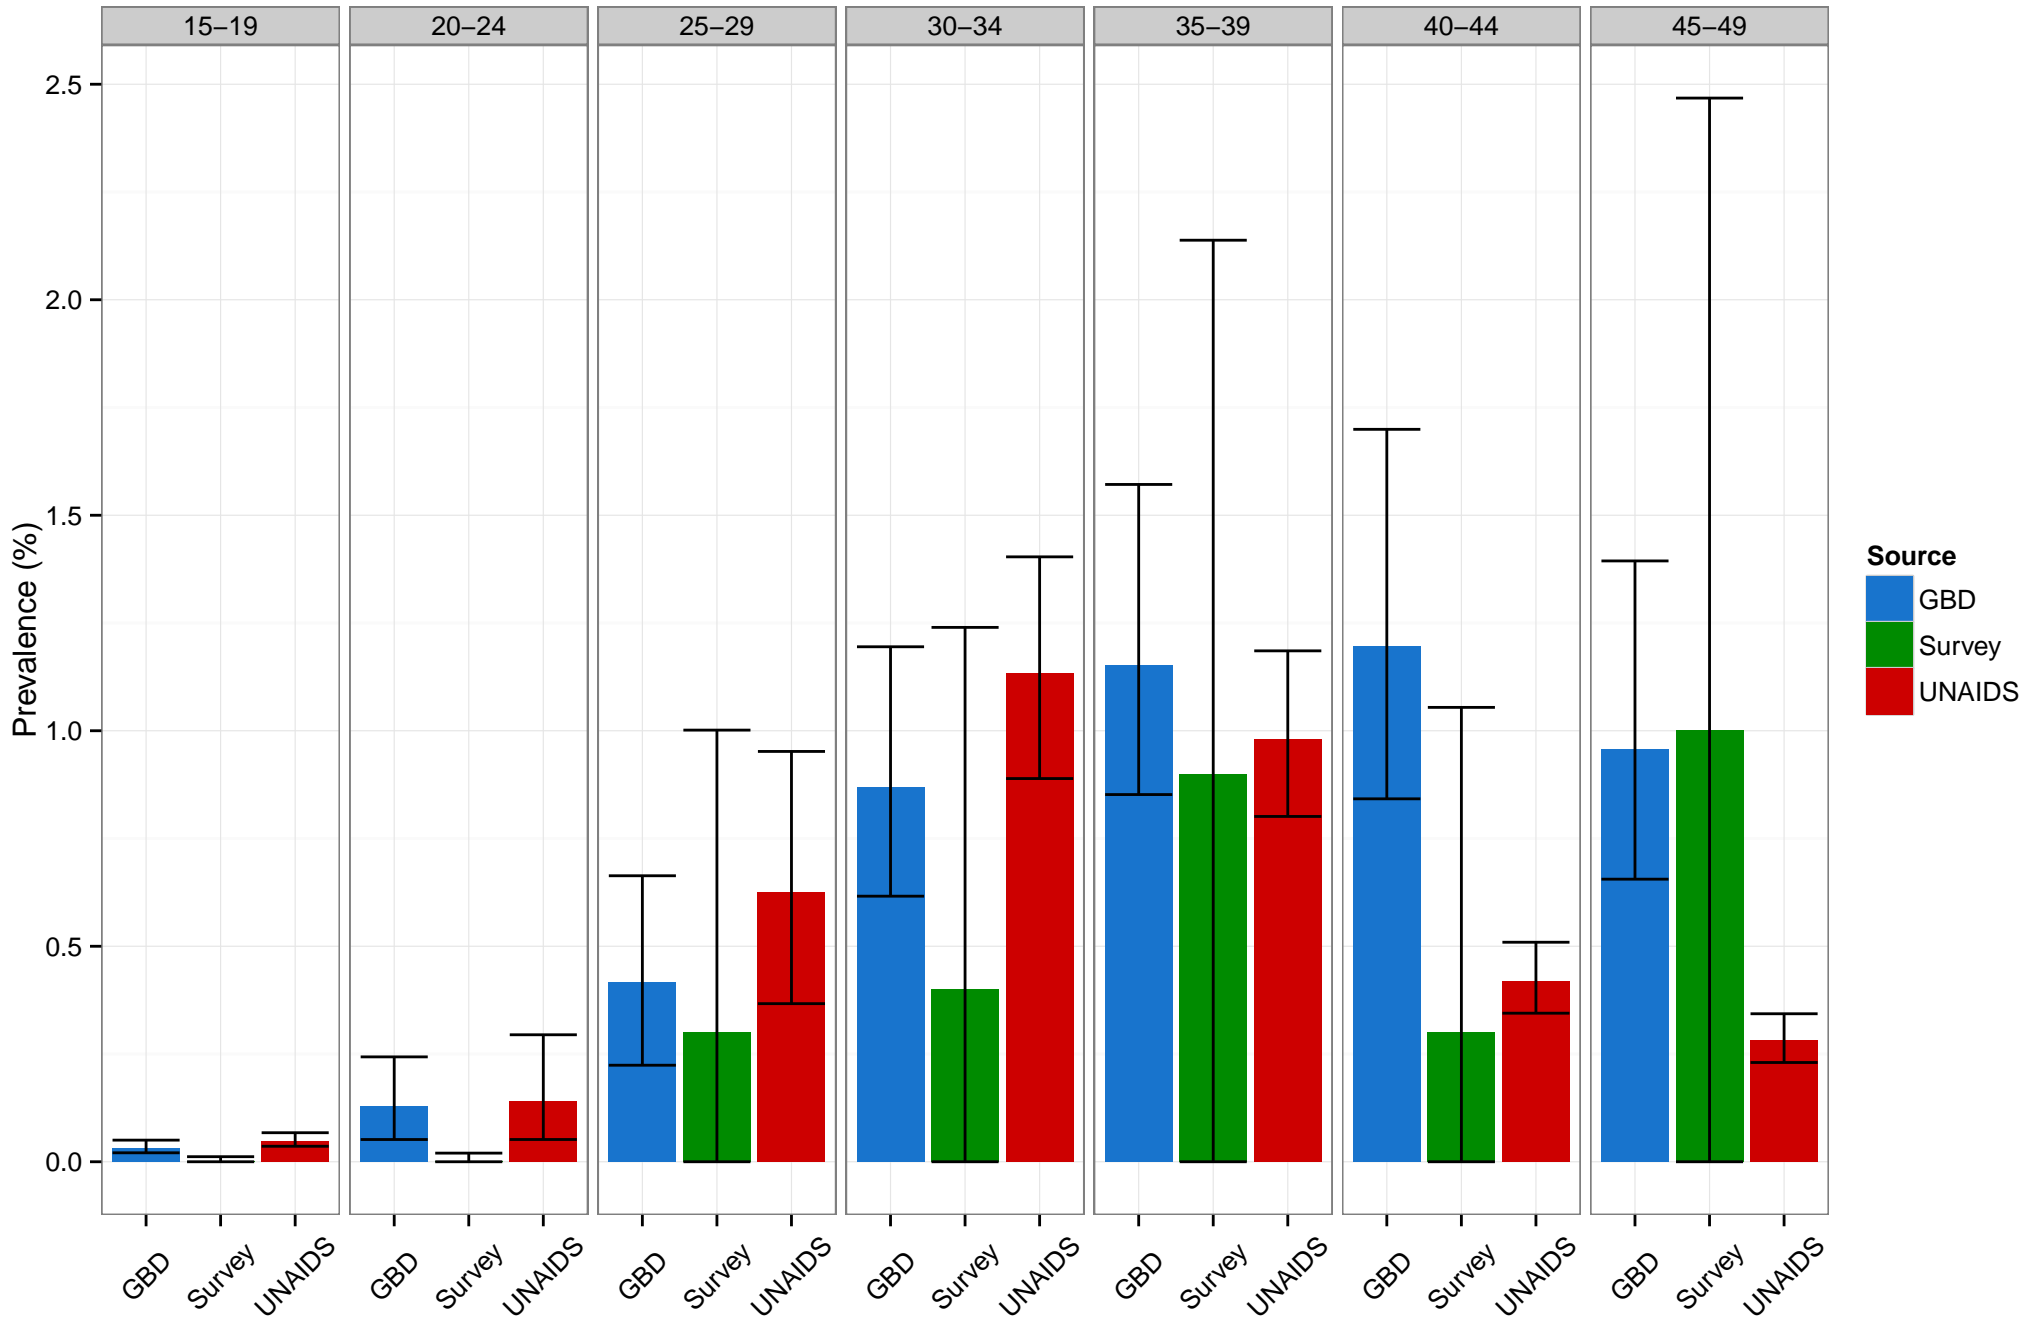

# HIV prevalence comparison to survey estimates by age-group with 95% confidence intervals

NER 2012 Females

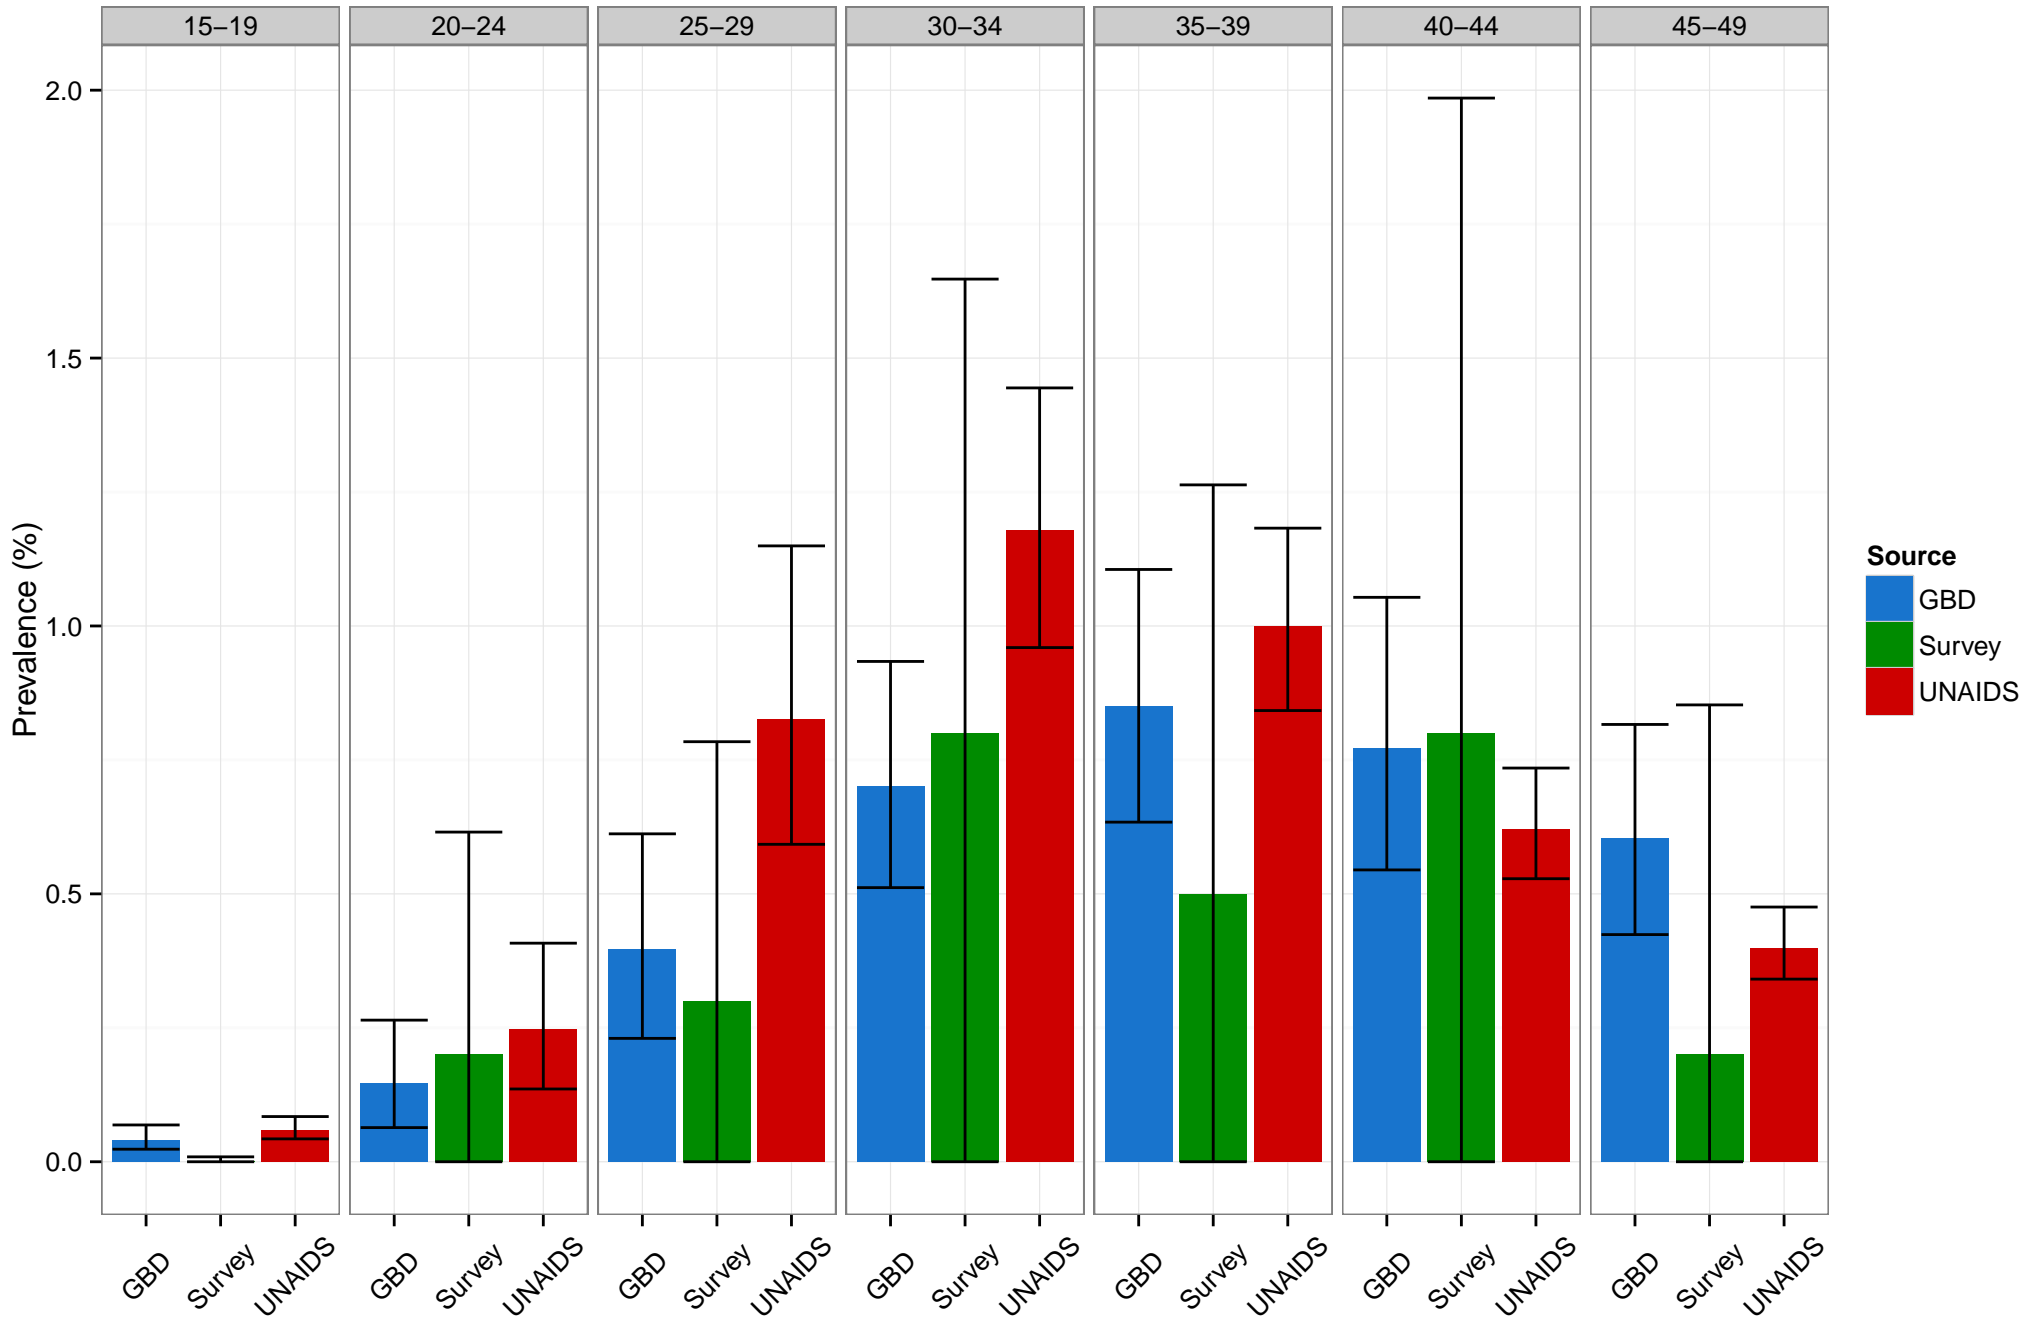

# HIV prevalence comparison to survey estimates by age-group with 95% confidence intervals

RWA 2005 Males

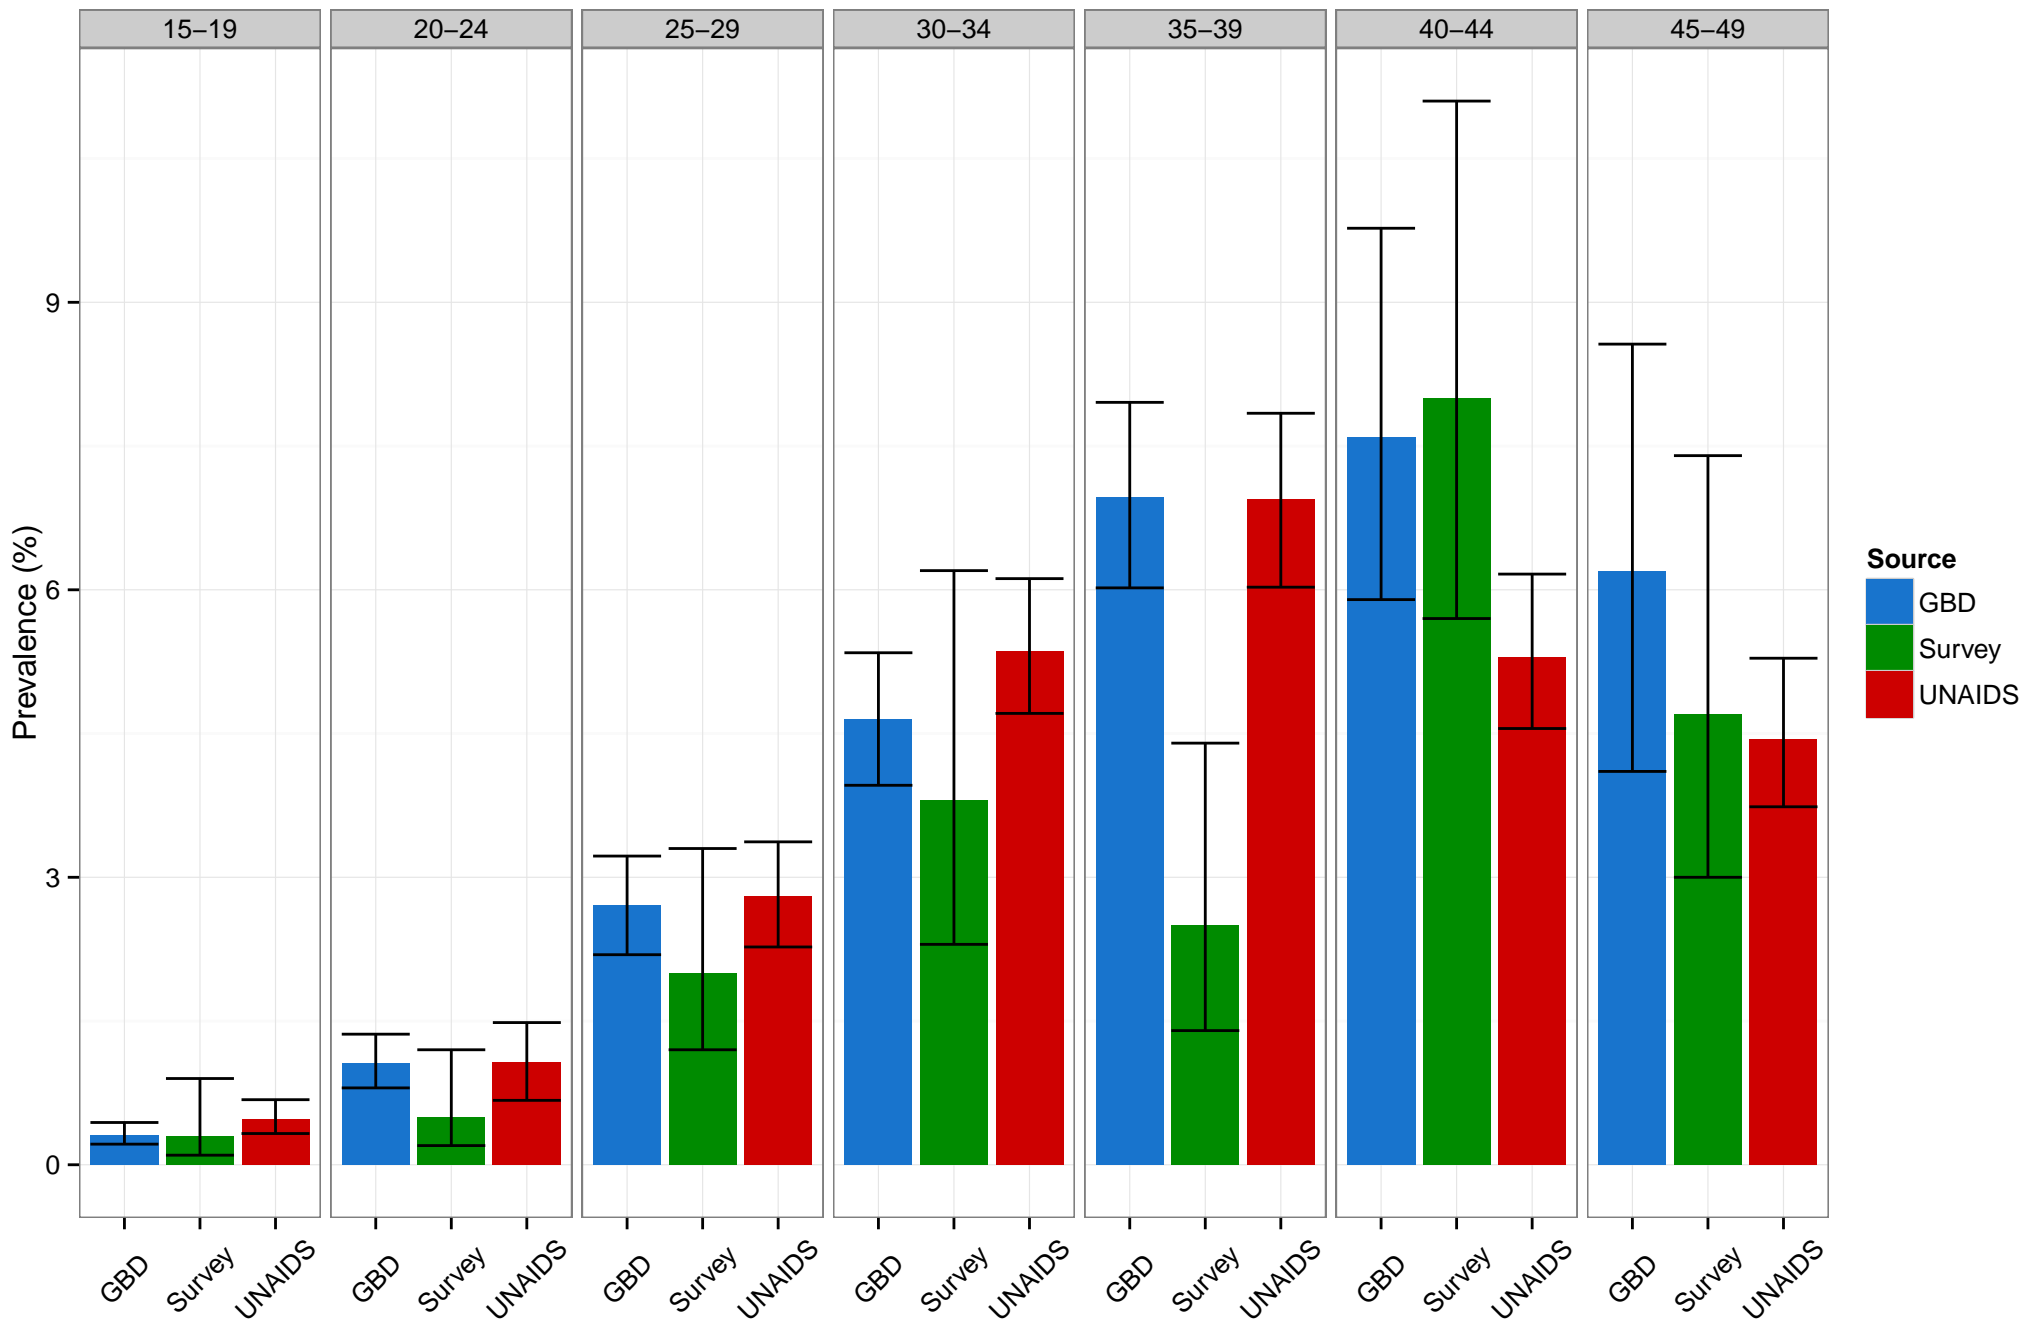

# HIV prevalence comparison to survey estimates by age-group with 95% confidence intervals

RWA 2005 Females

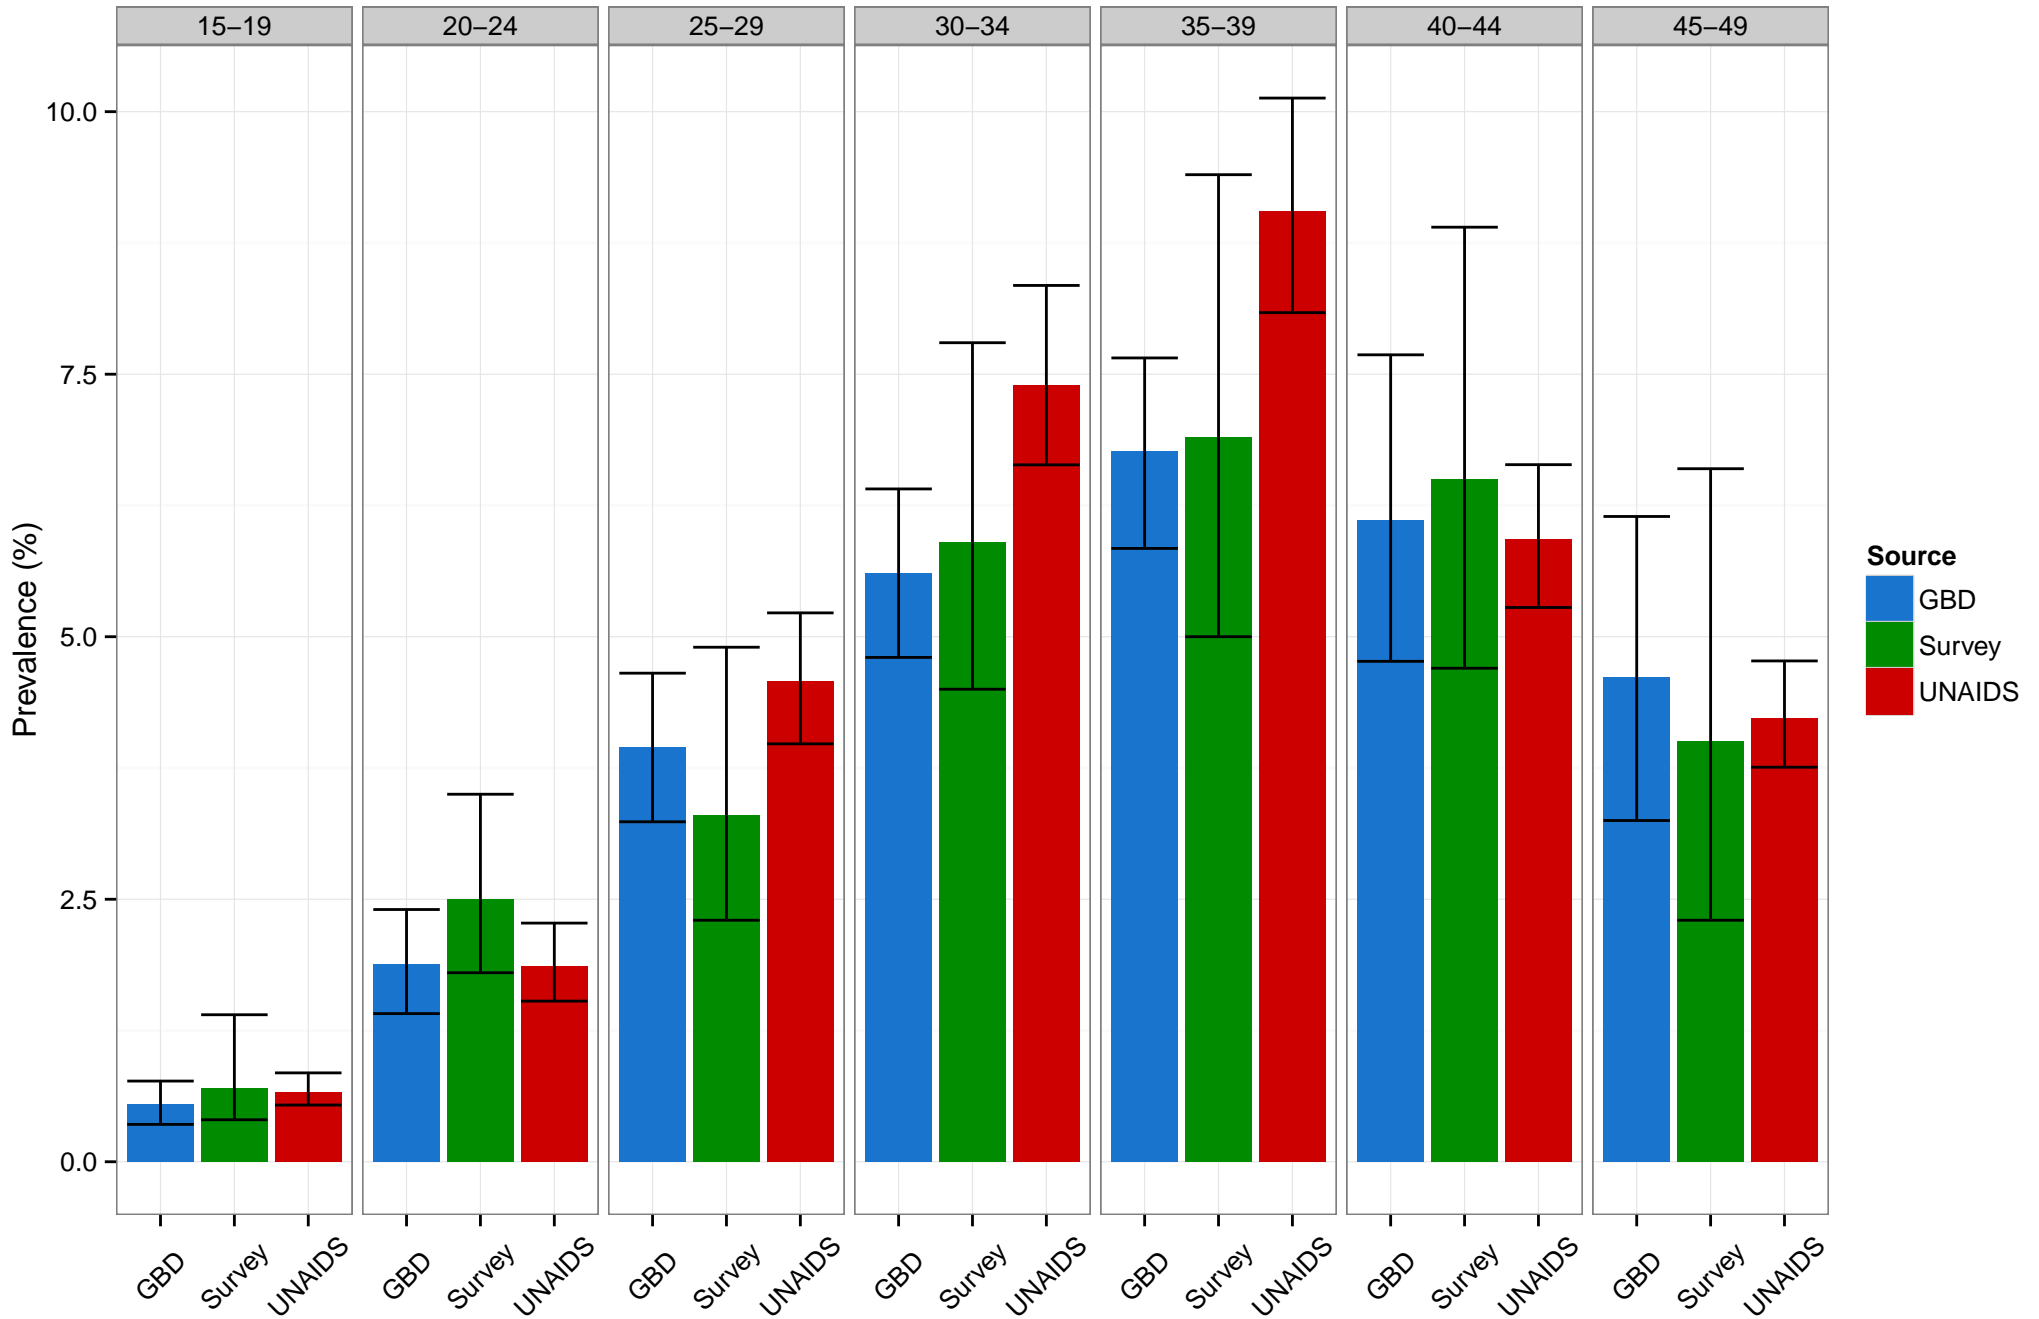

# HIV prevalence comparison to survey estimates by age-group with 95% confidence intervals

RWA 2010 Males

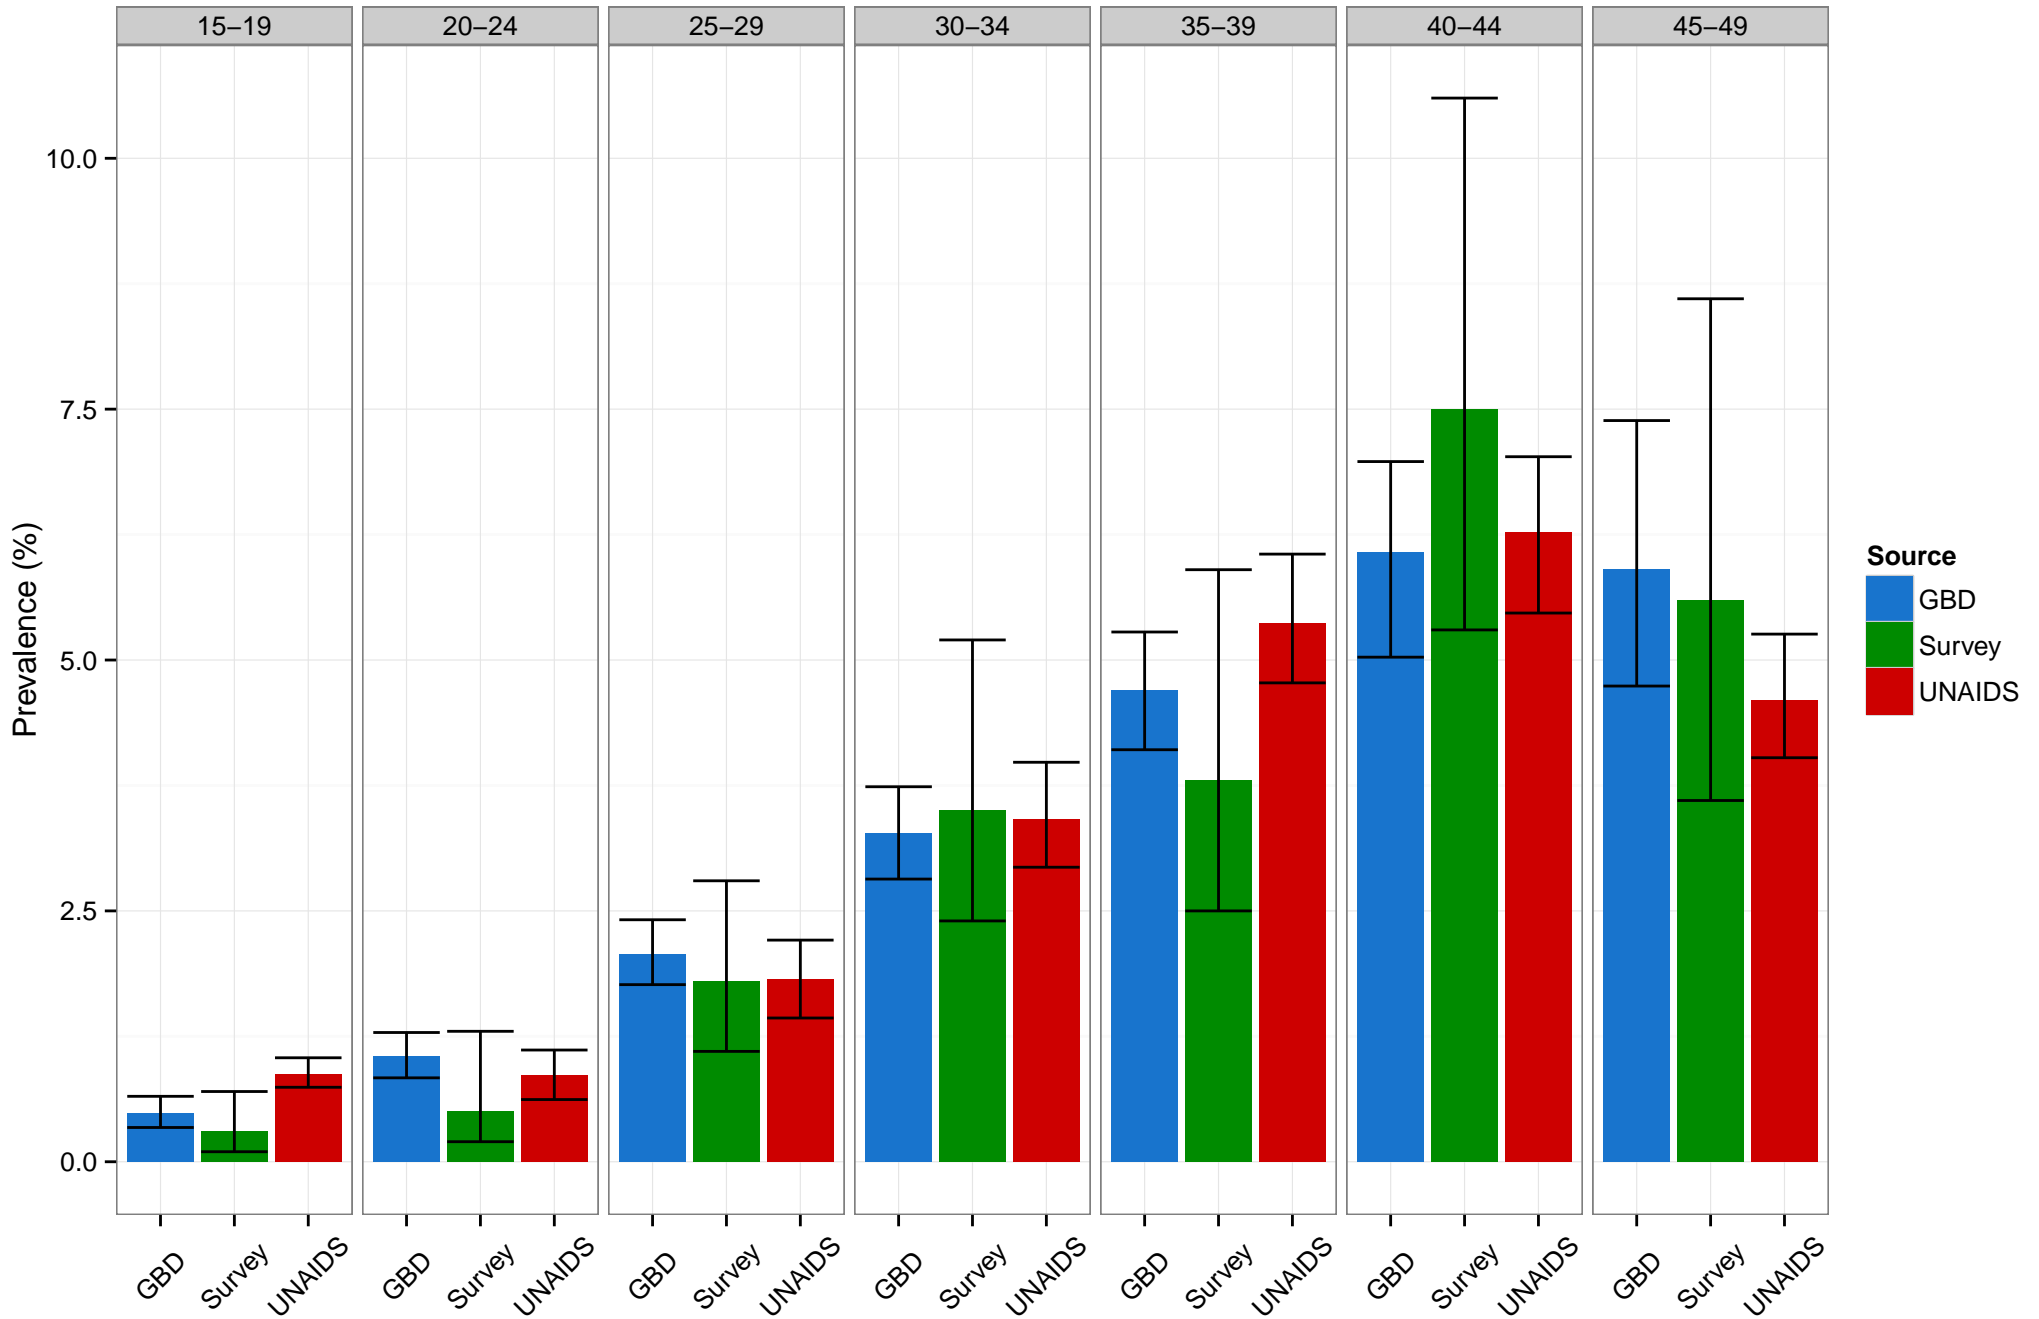

# HIV prevalence comparison to survey estimates by age-group with 95% confidence intervals

RWA 2010 Females

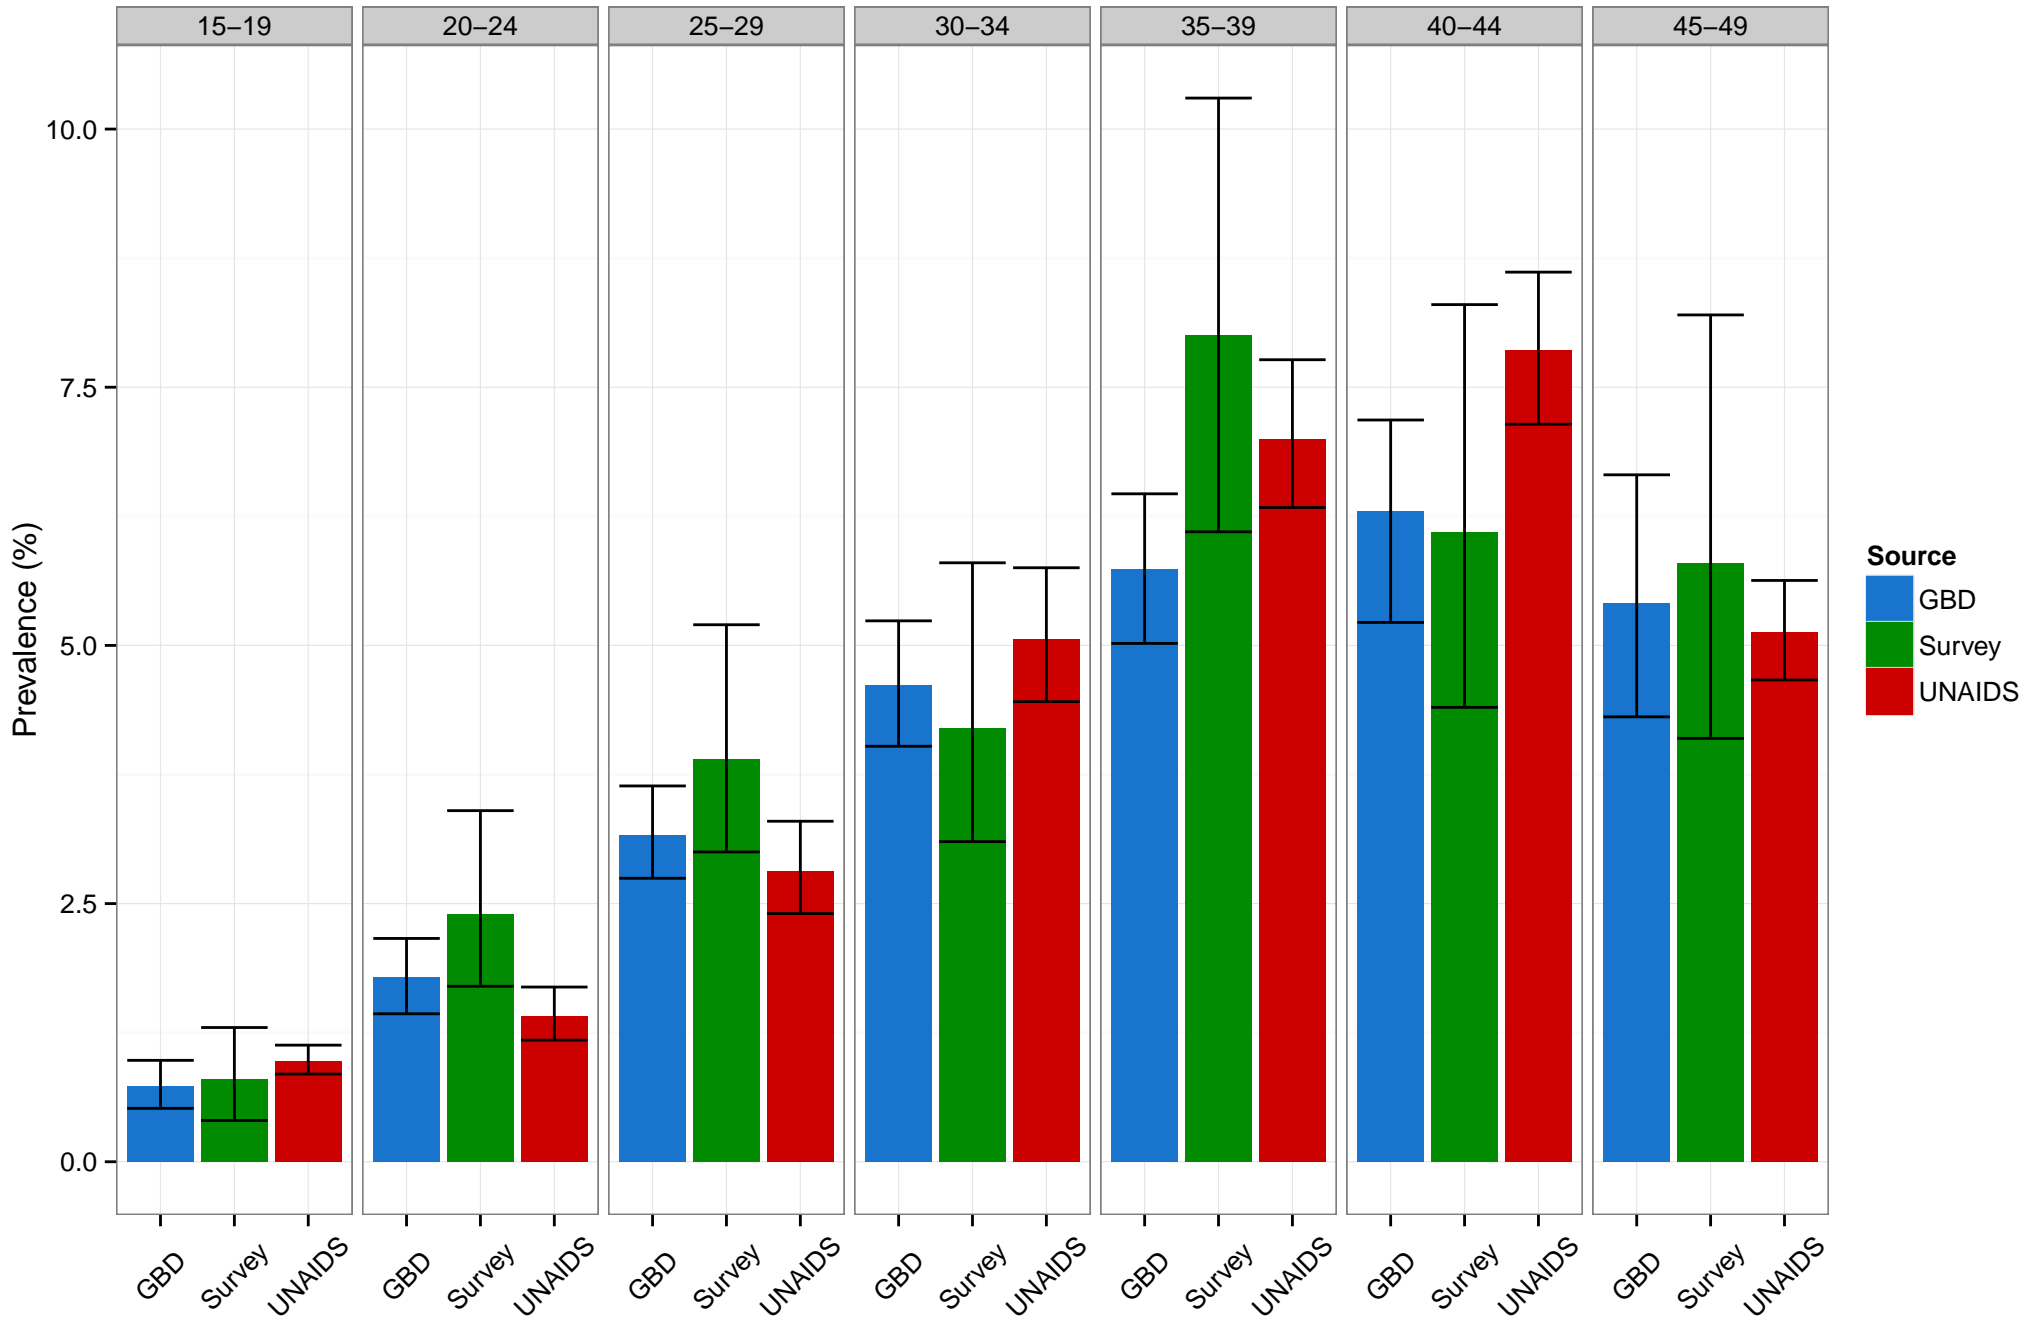

# HIV prevalence comparison to survey estimates by age-group with 95% confidence intervals

SEN 2005 Males

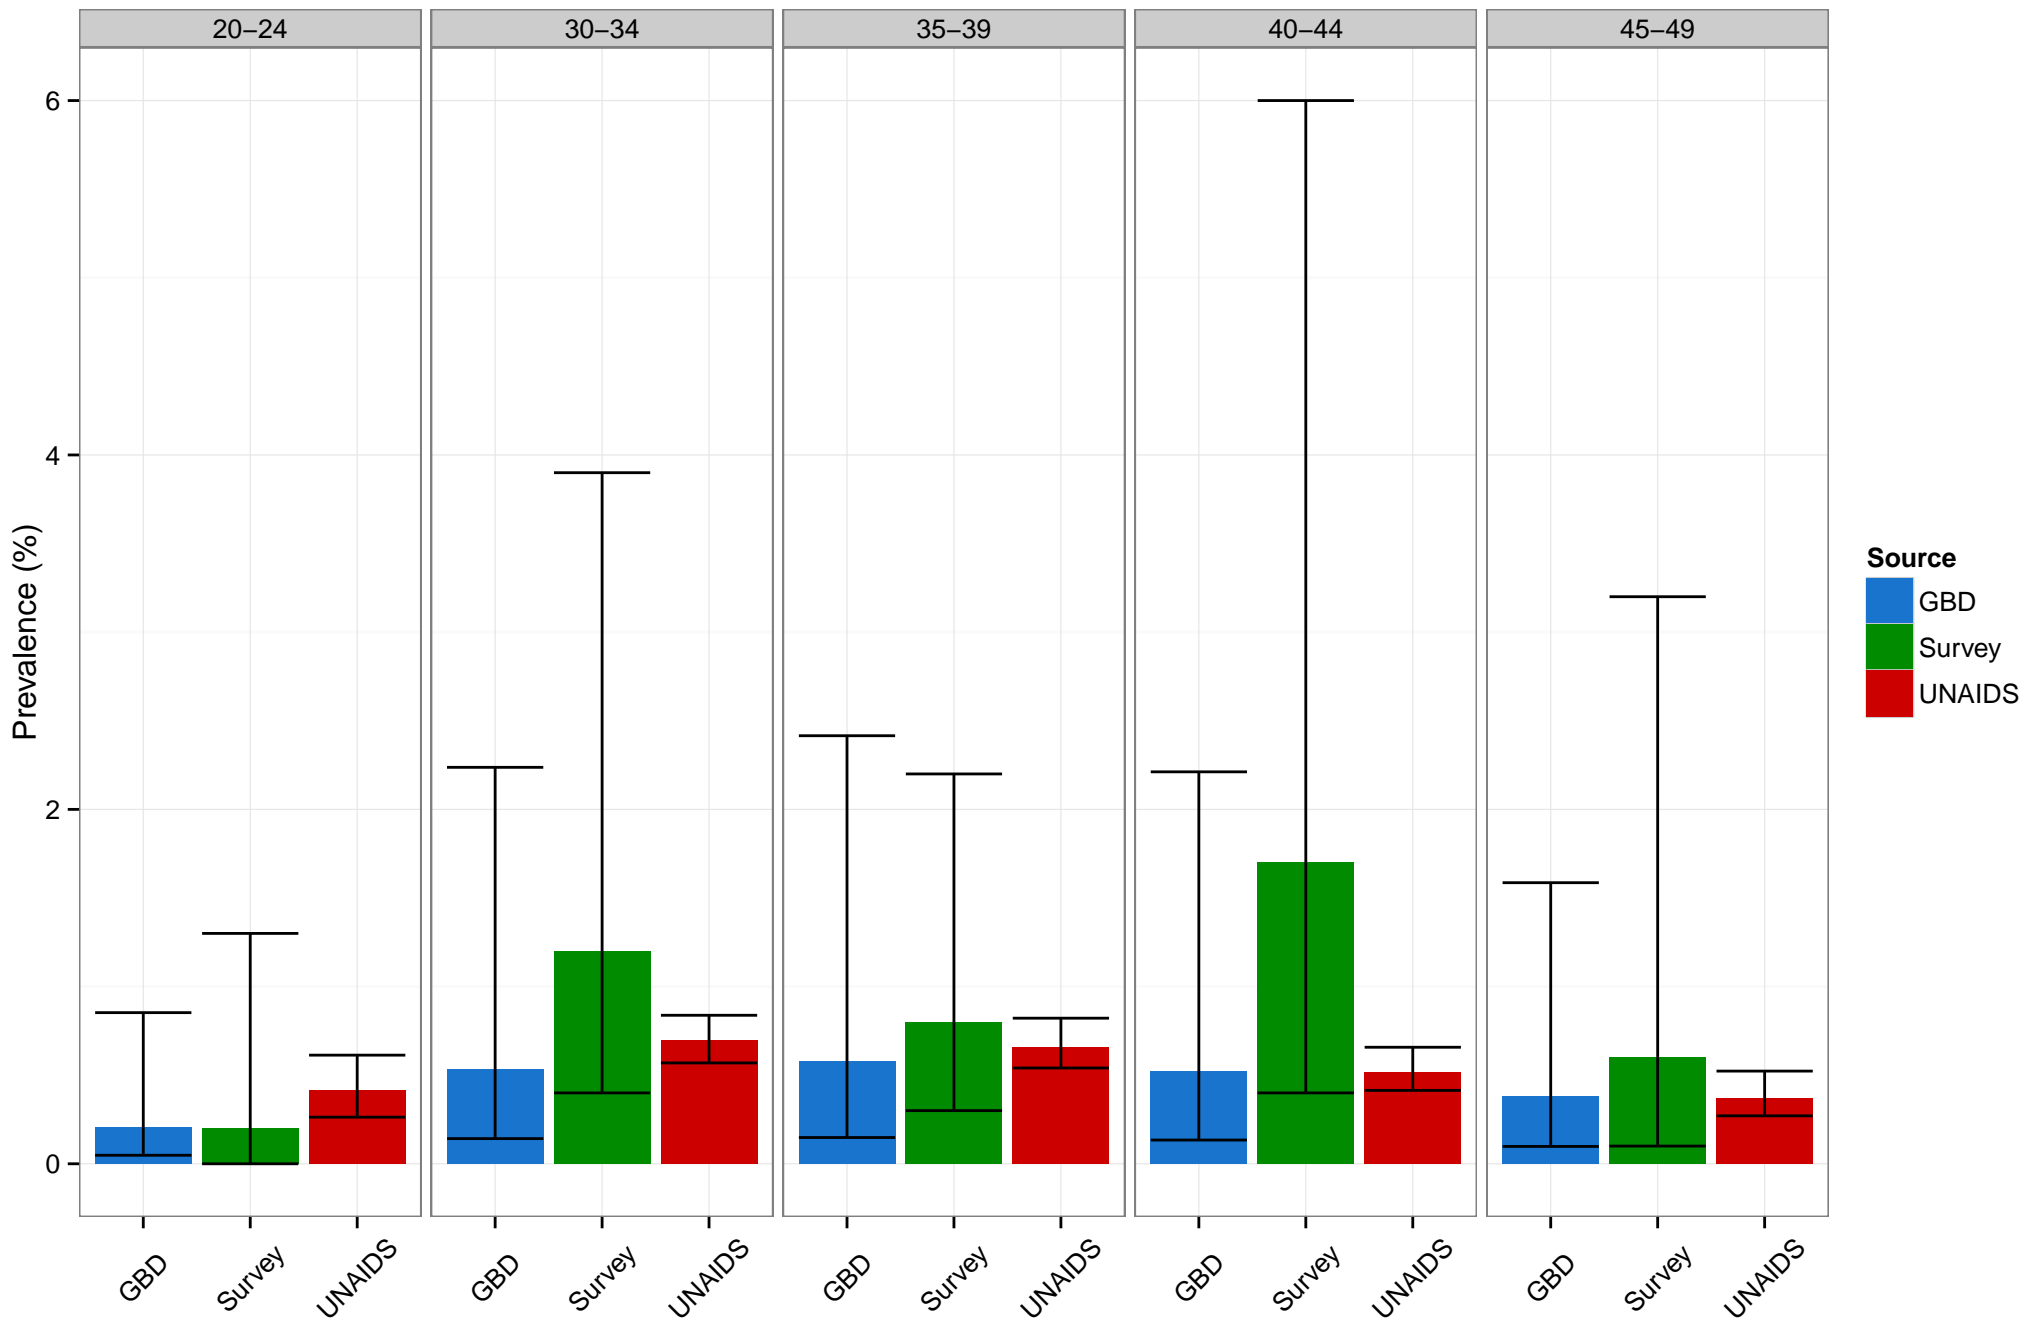

# HIV prevalence comparison to survey estimates by age-group with 95% confidence intervals

SEN 2005 Females

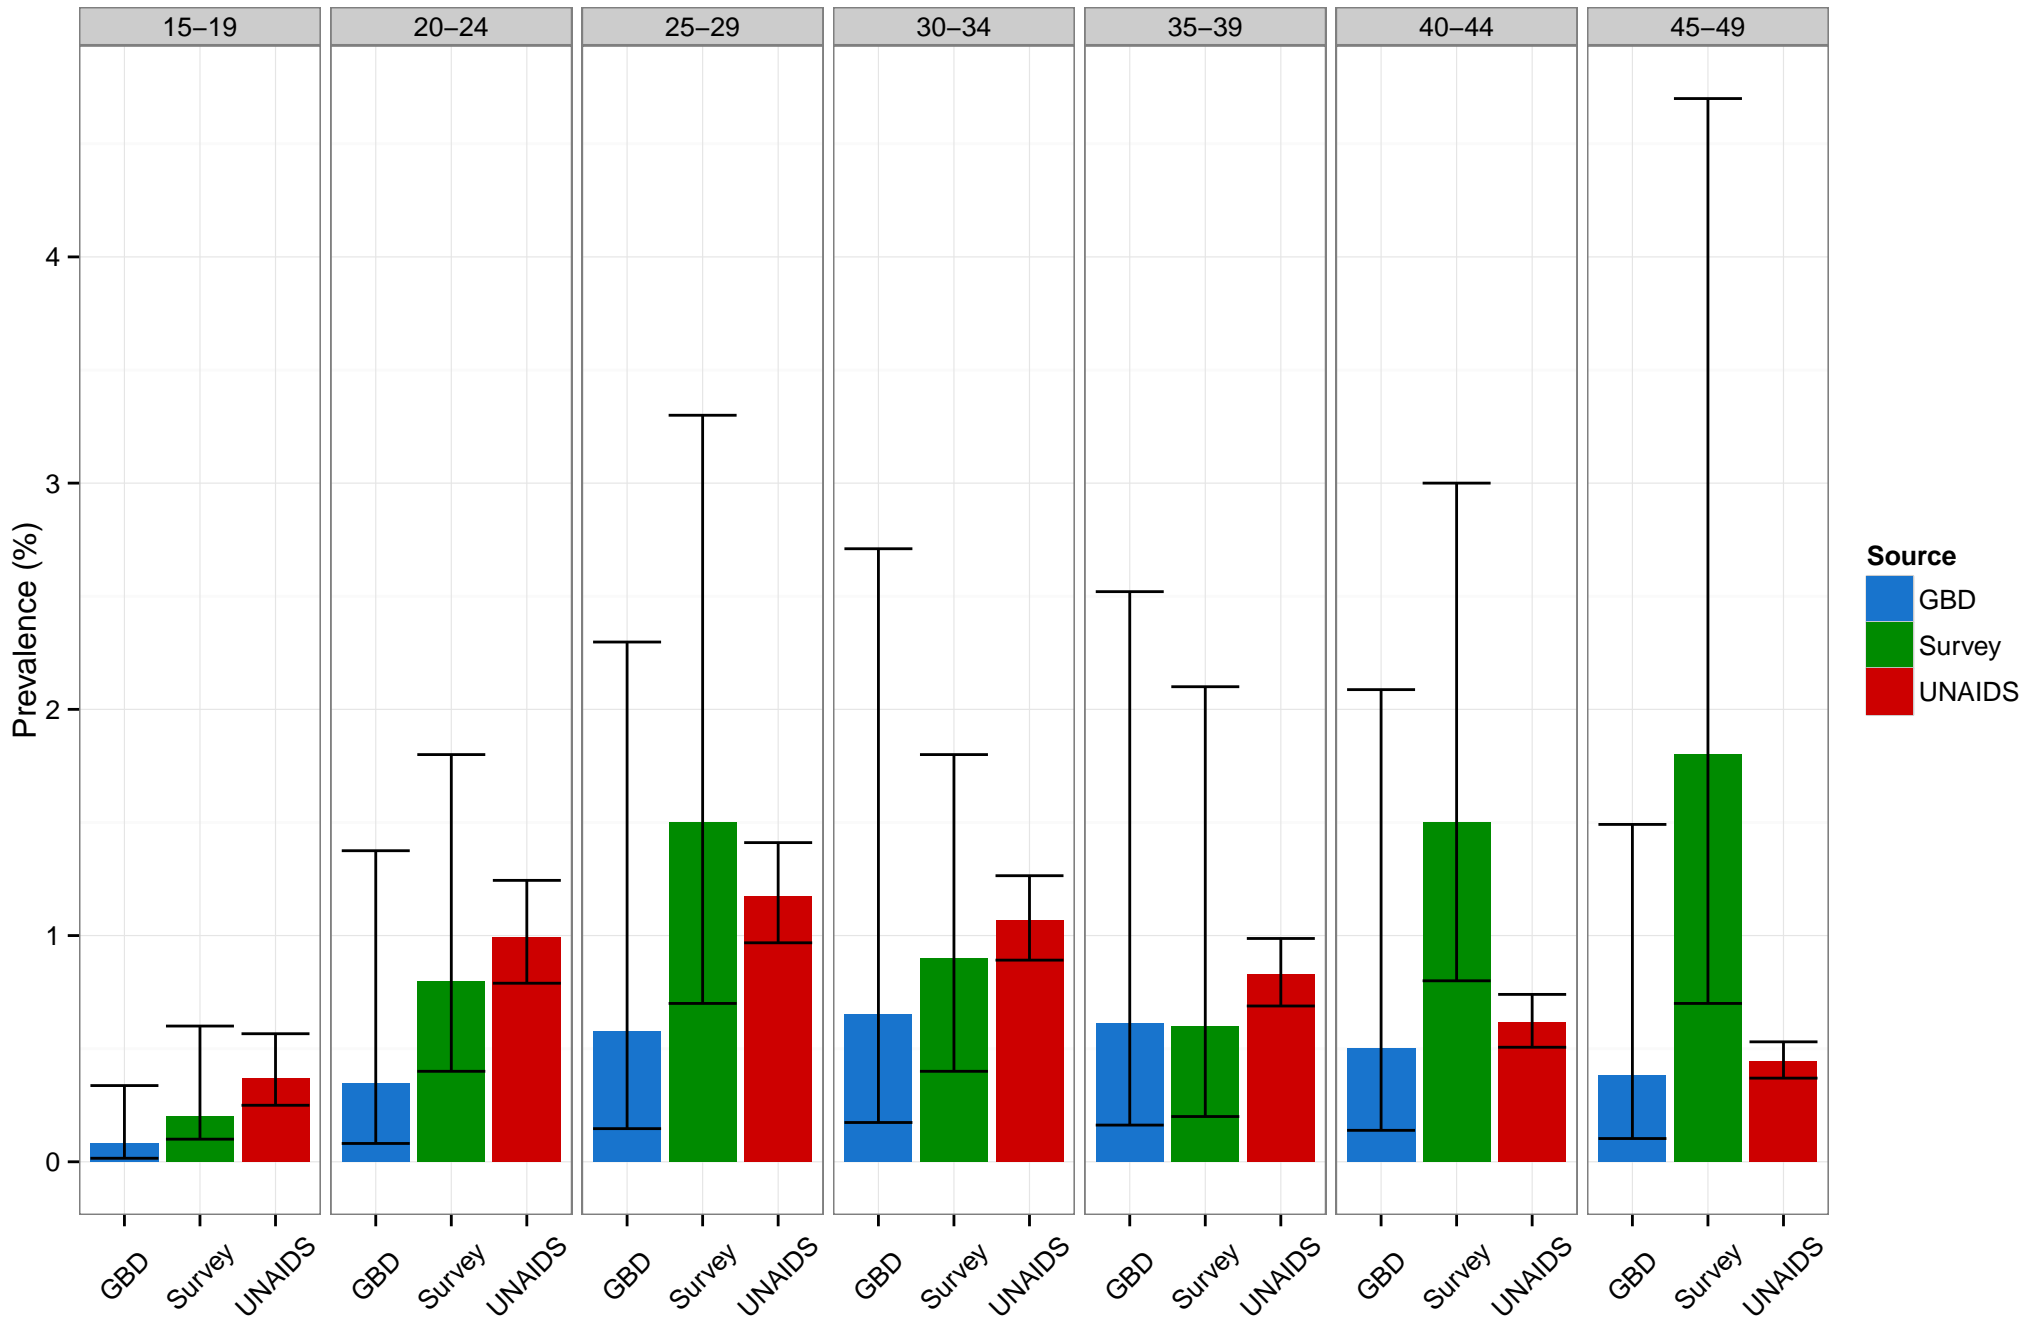



# HIV prevalence comparison to survey estimates by age-group with 95% confidence intervals

SEN 2011 Males

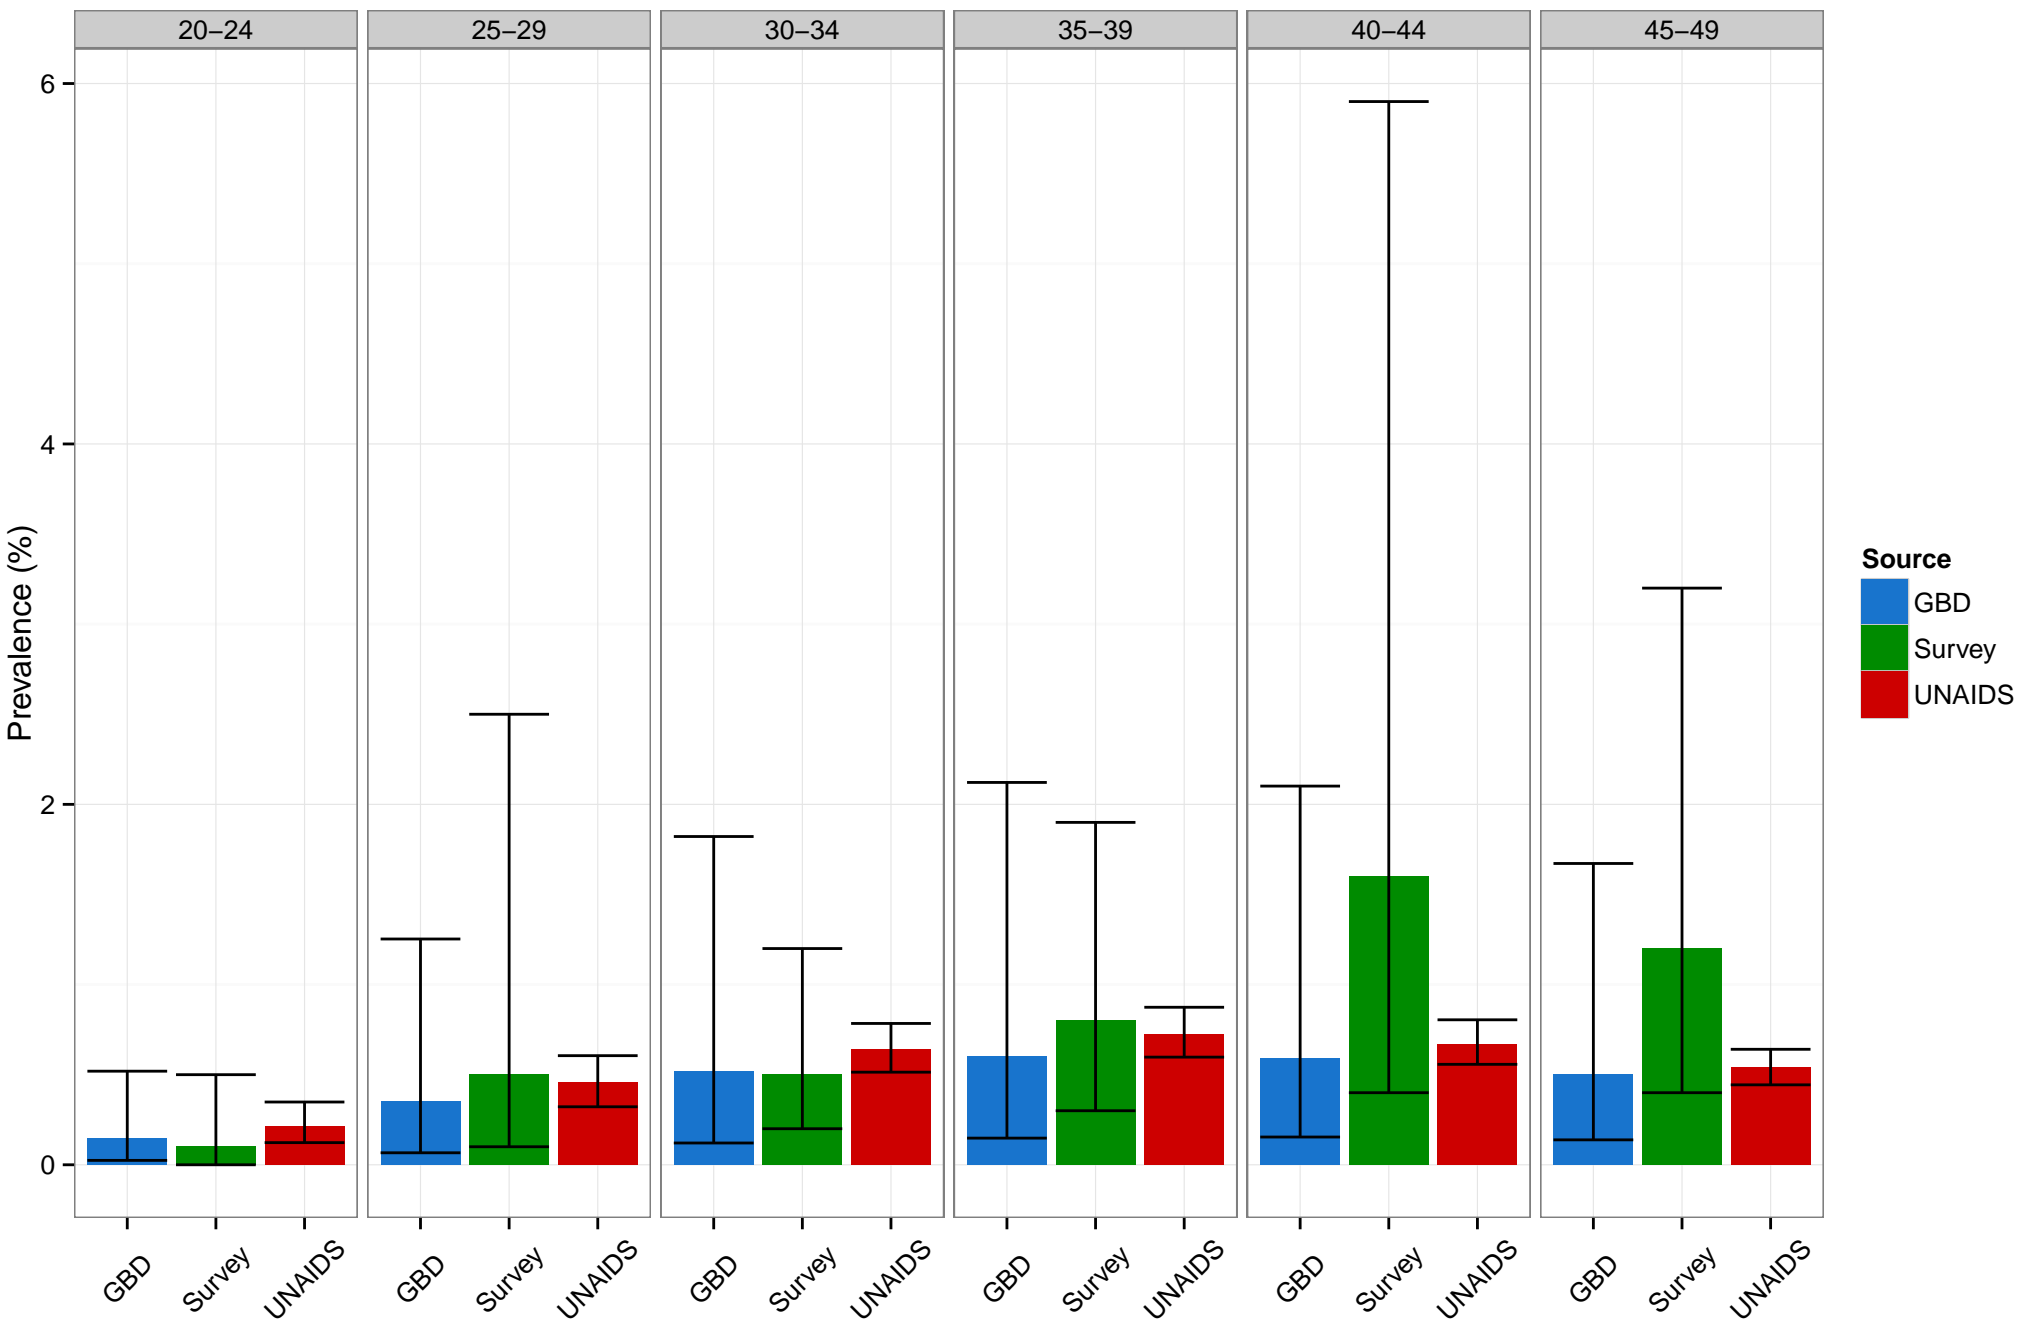

# HIV prevalence comparison to survey estimates by age-group with 95% confidence intervals

SEN 2011 Females

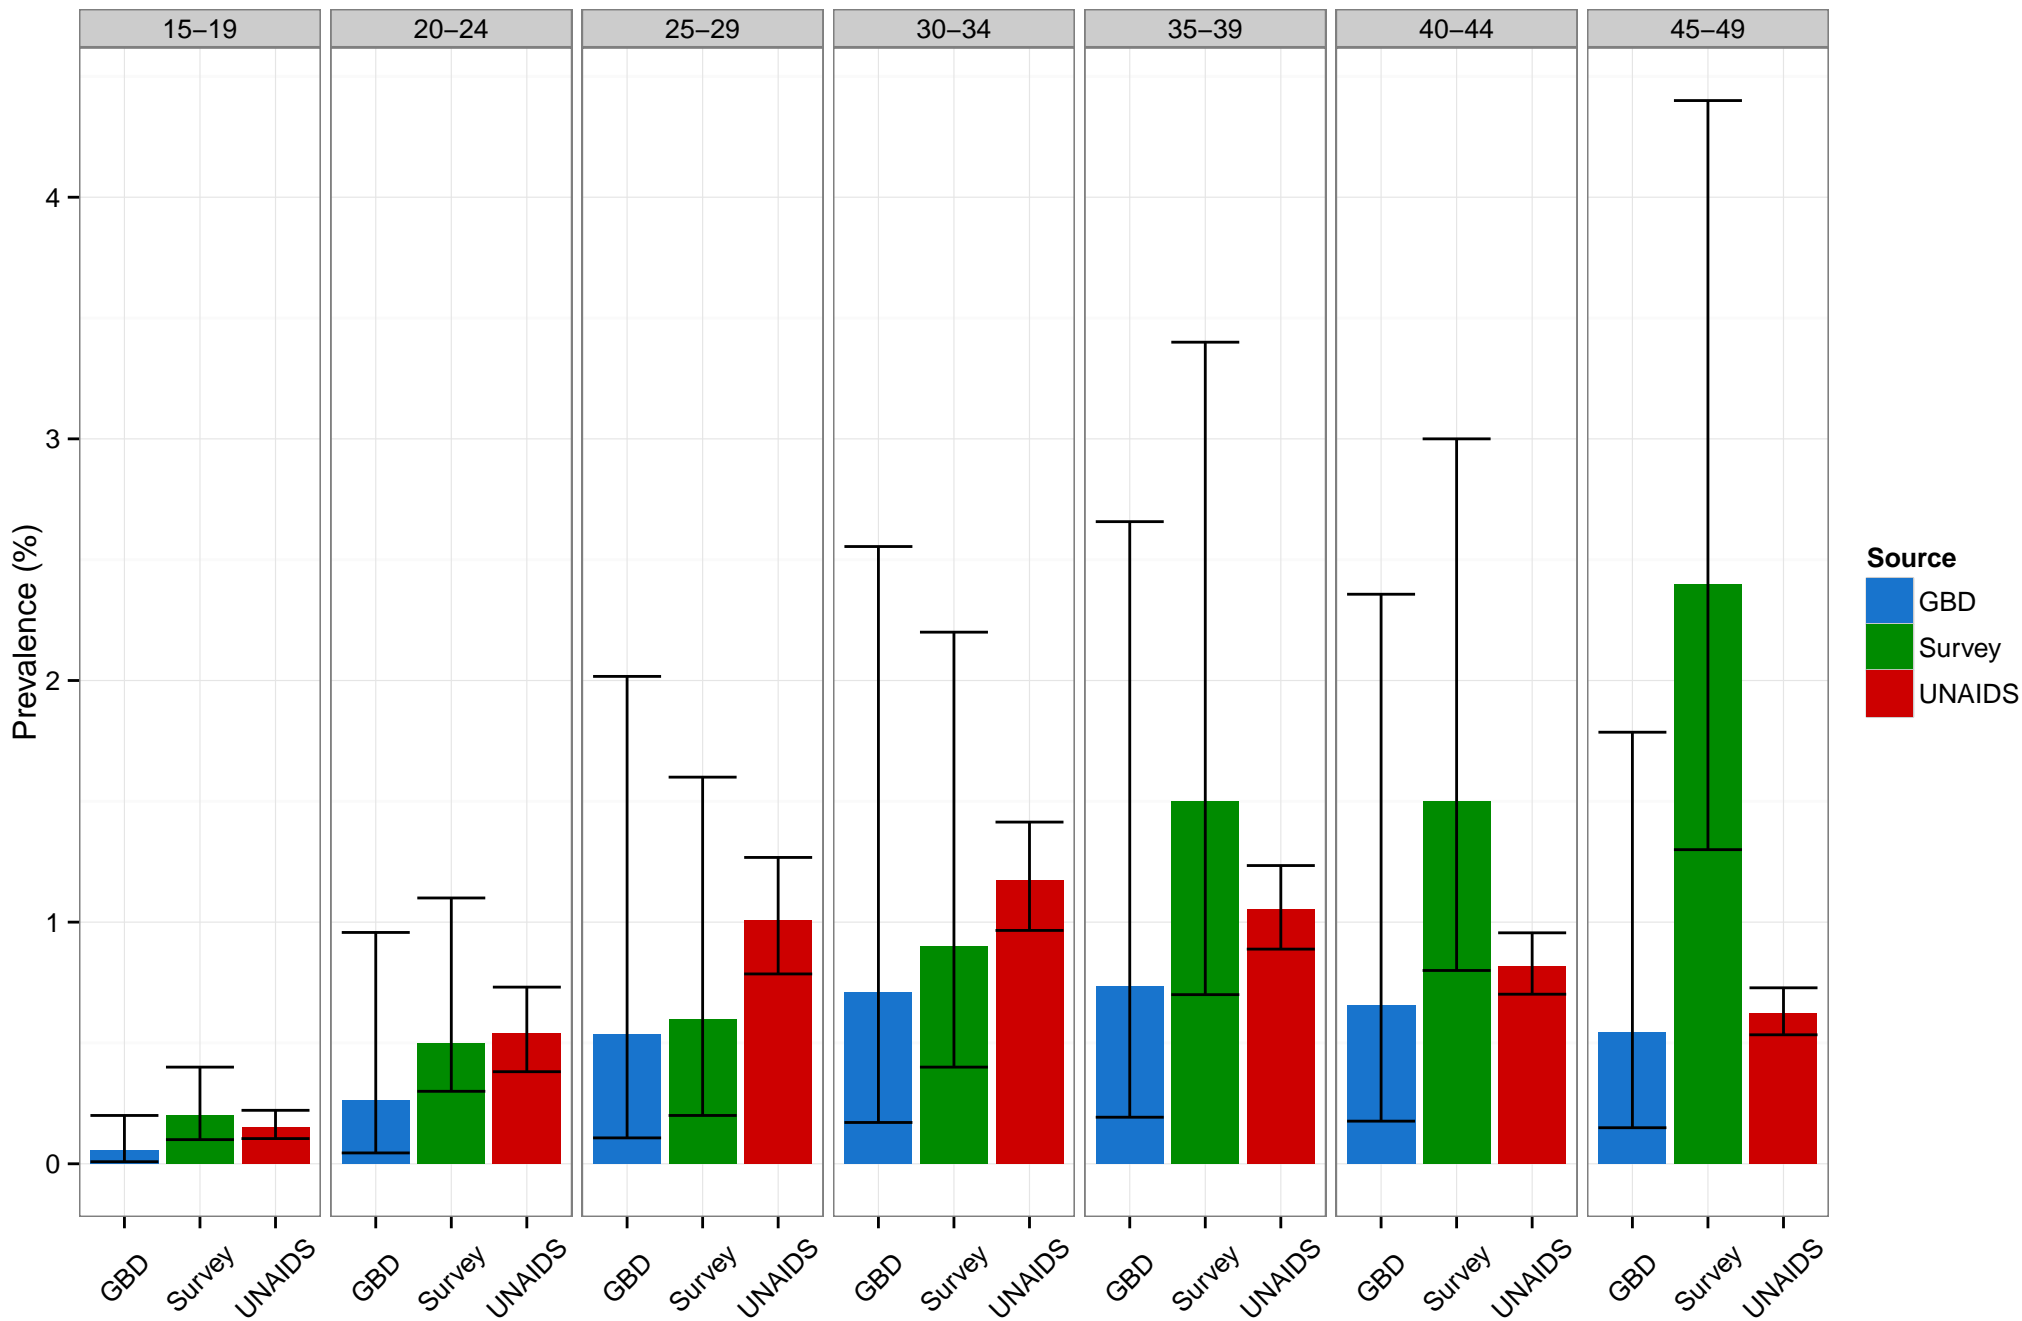

# HIV prevalence comparison to survey estimates by age-group with 95% confidence intervals

SLE 2008 Males

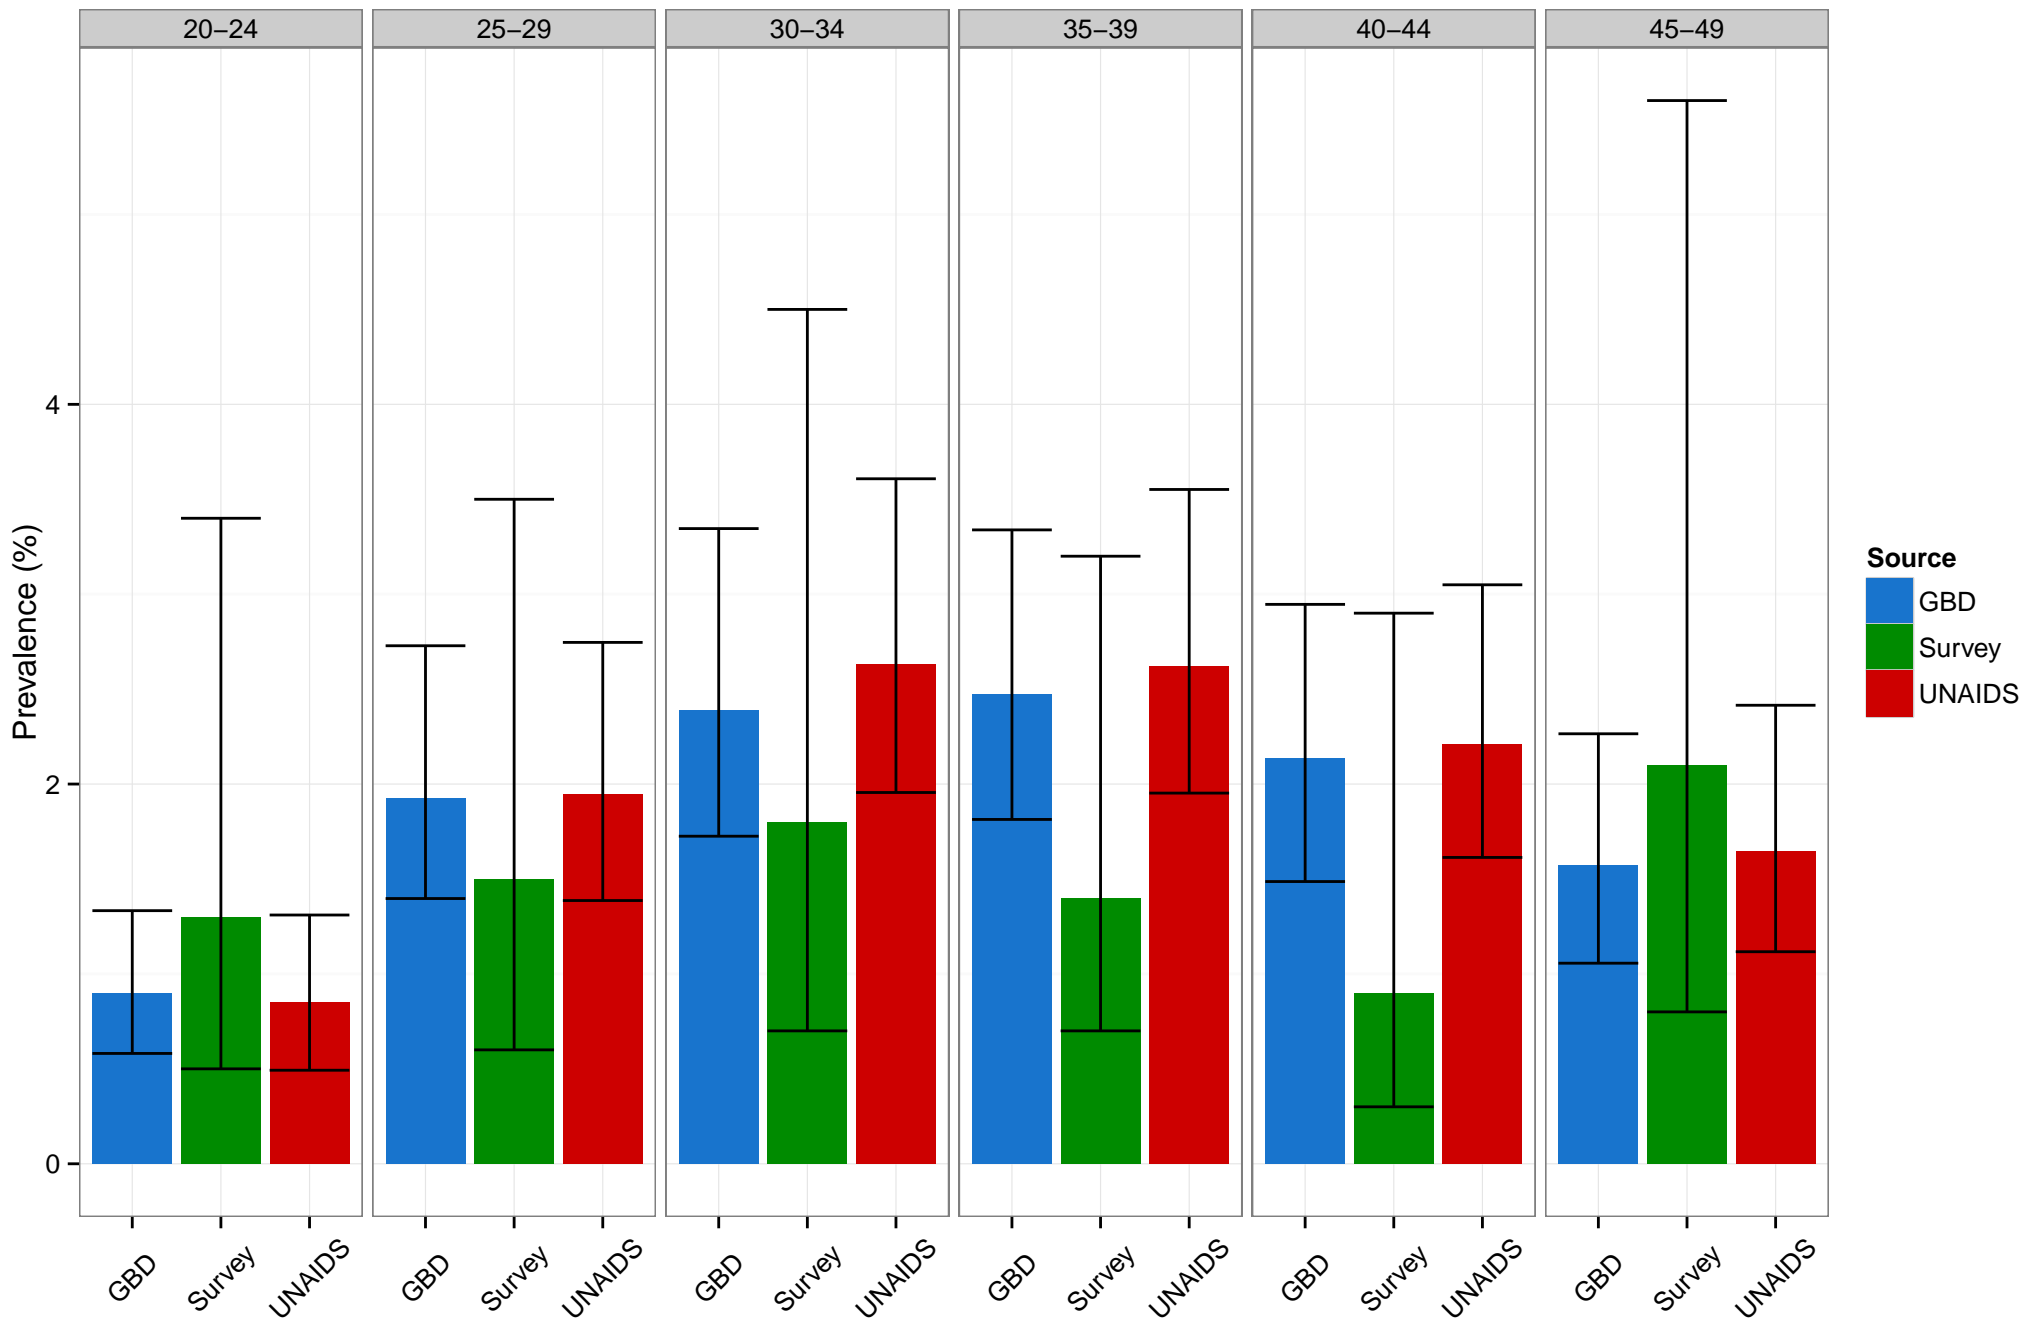

# HIV prevalence comparison to survey estimates by age-group with 95% confidence intervals

SLE 2008 Females

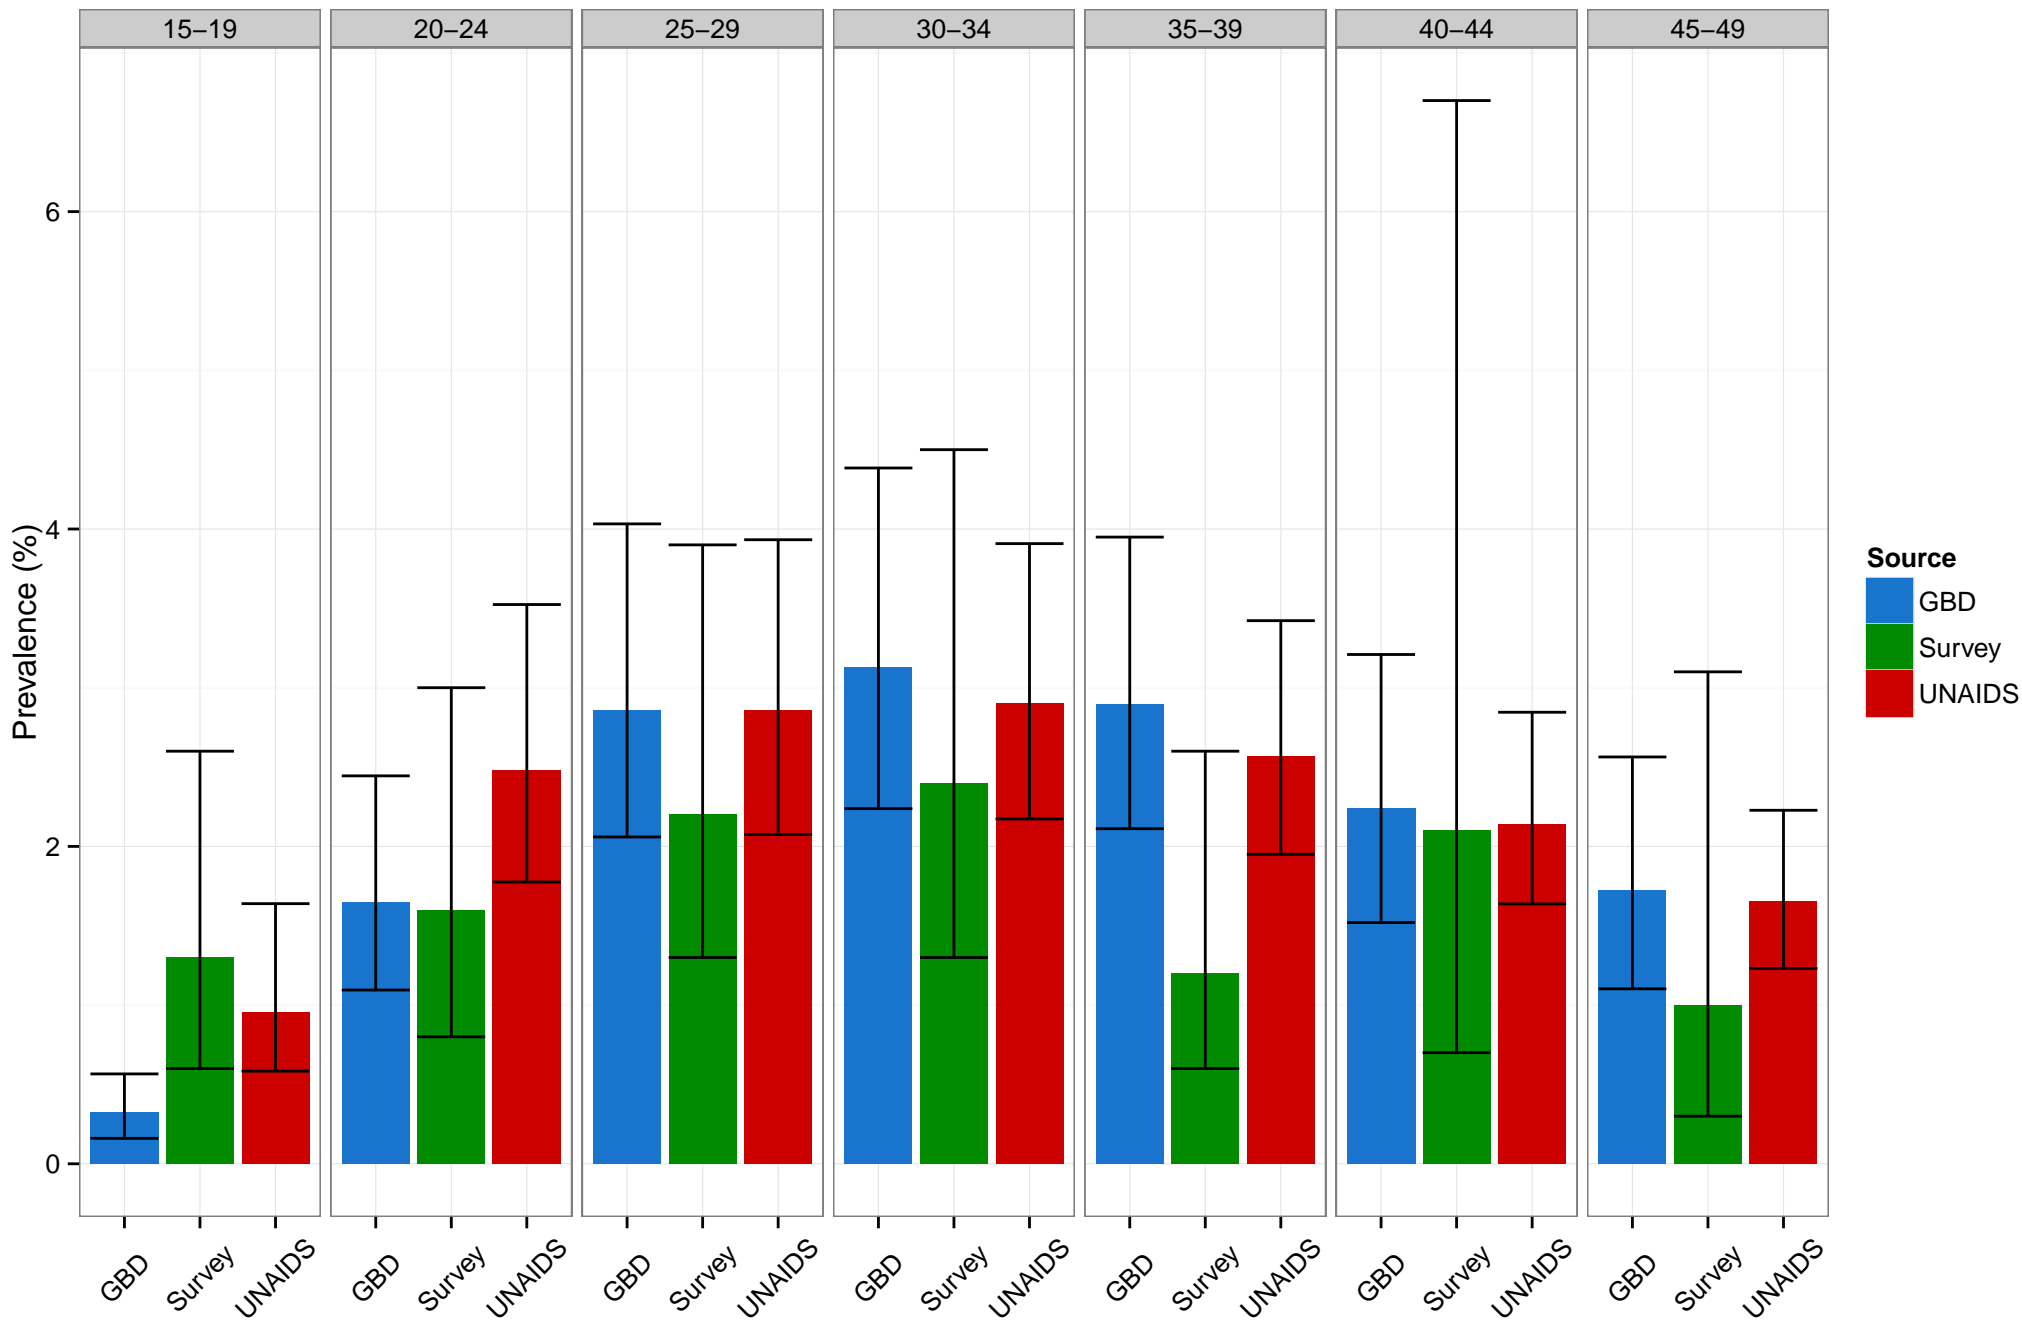

# HIV prevalence comparison to survey estimates by age-group with 95% confidence intervals

STP 2008–2009 Males

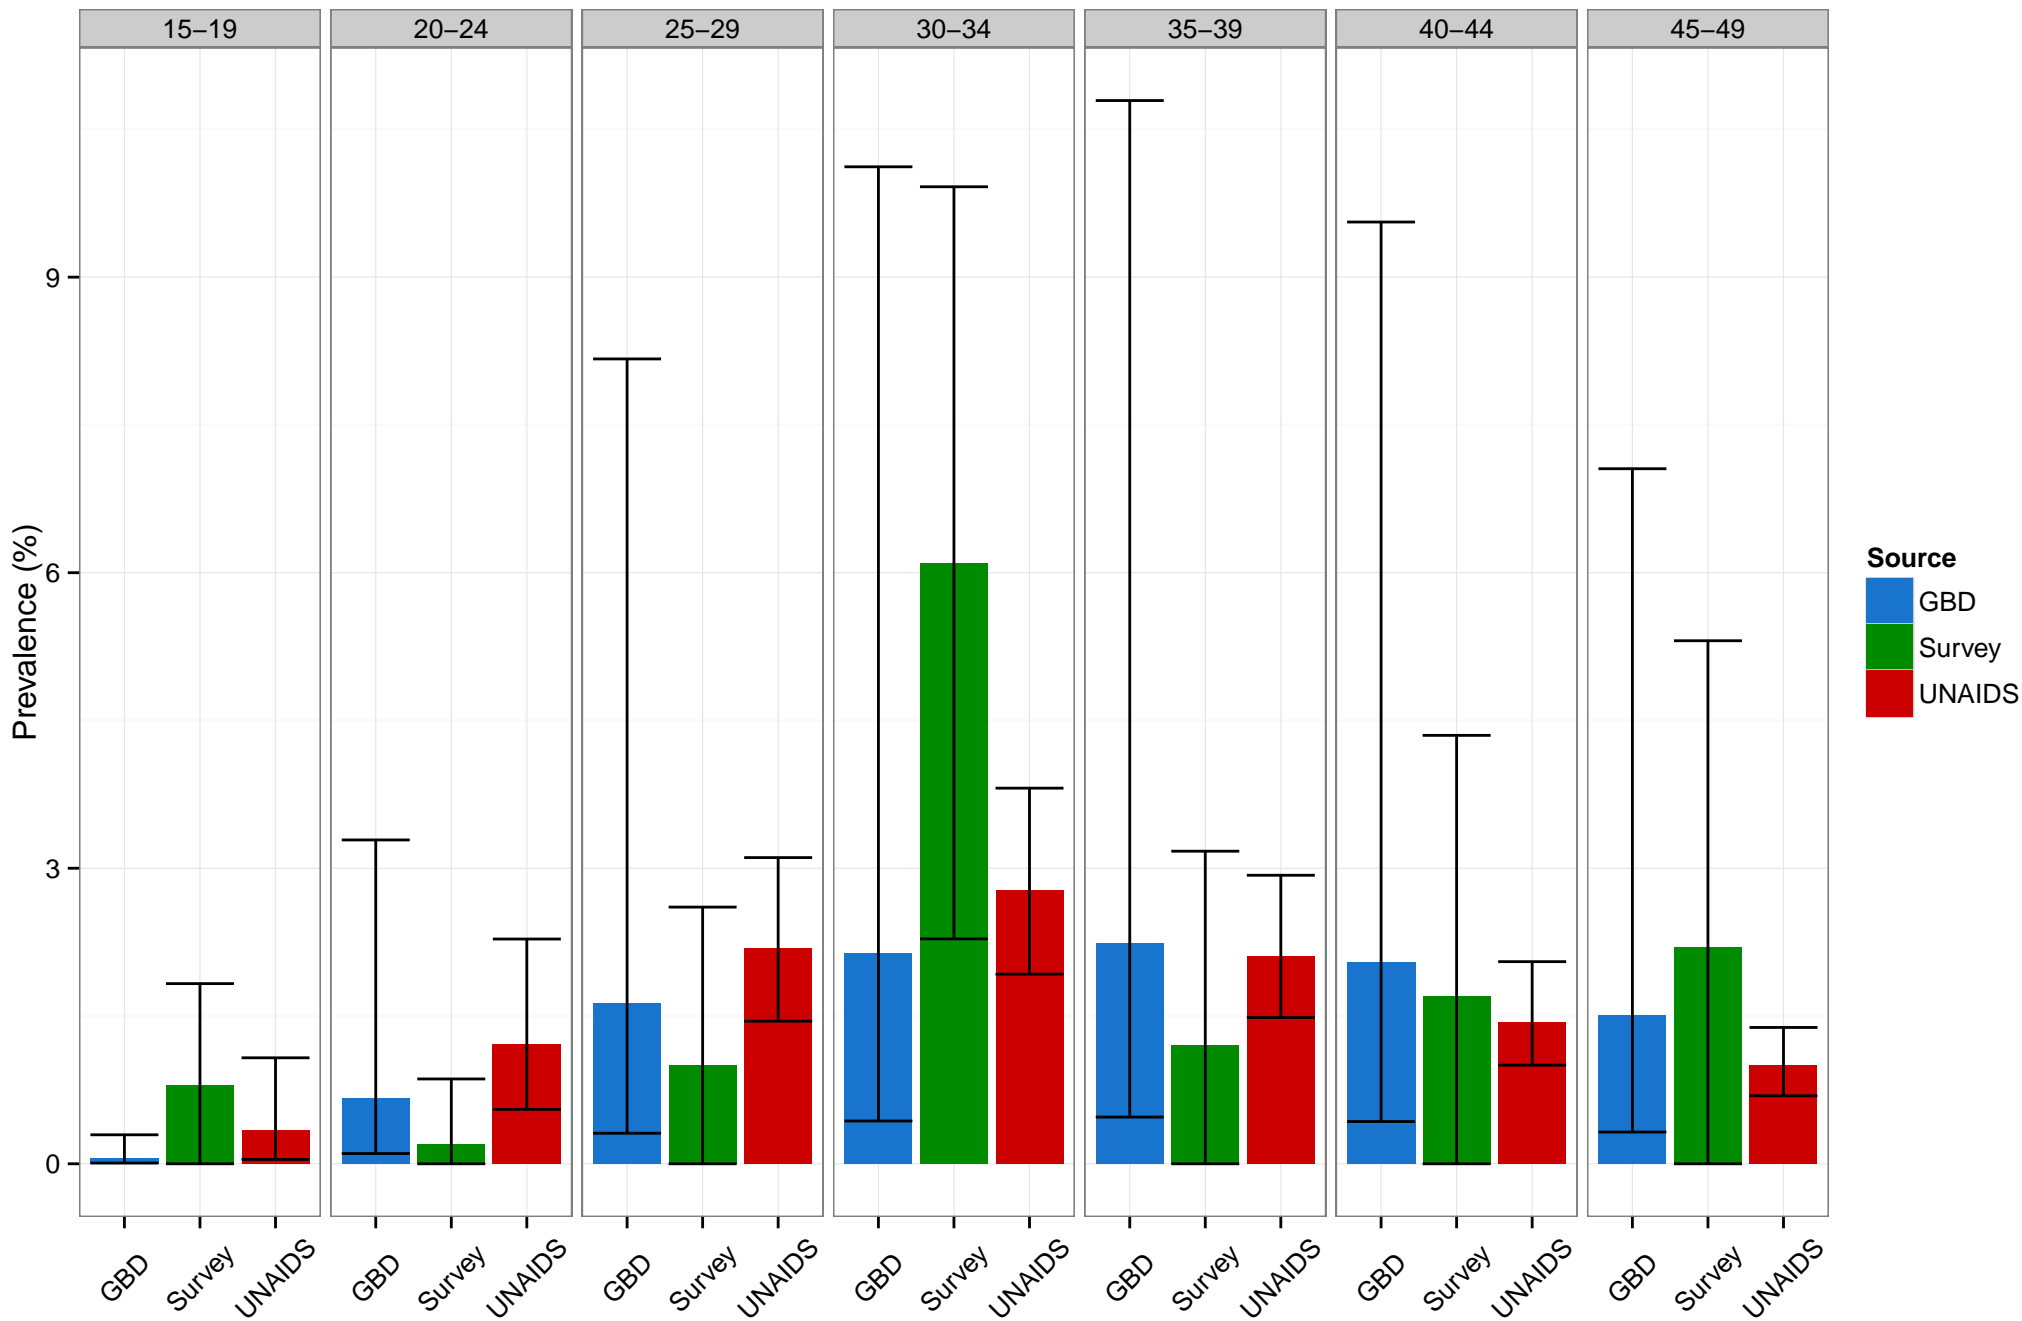

# HIV prevalence comparison to survey estimates by age-group with 95% confidence intervals

STP 2008–2009 Females

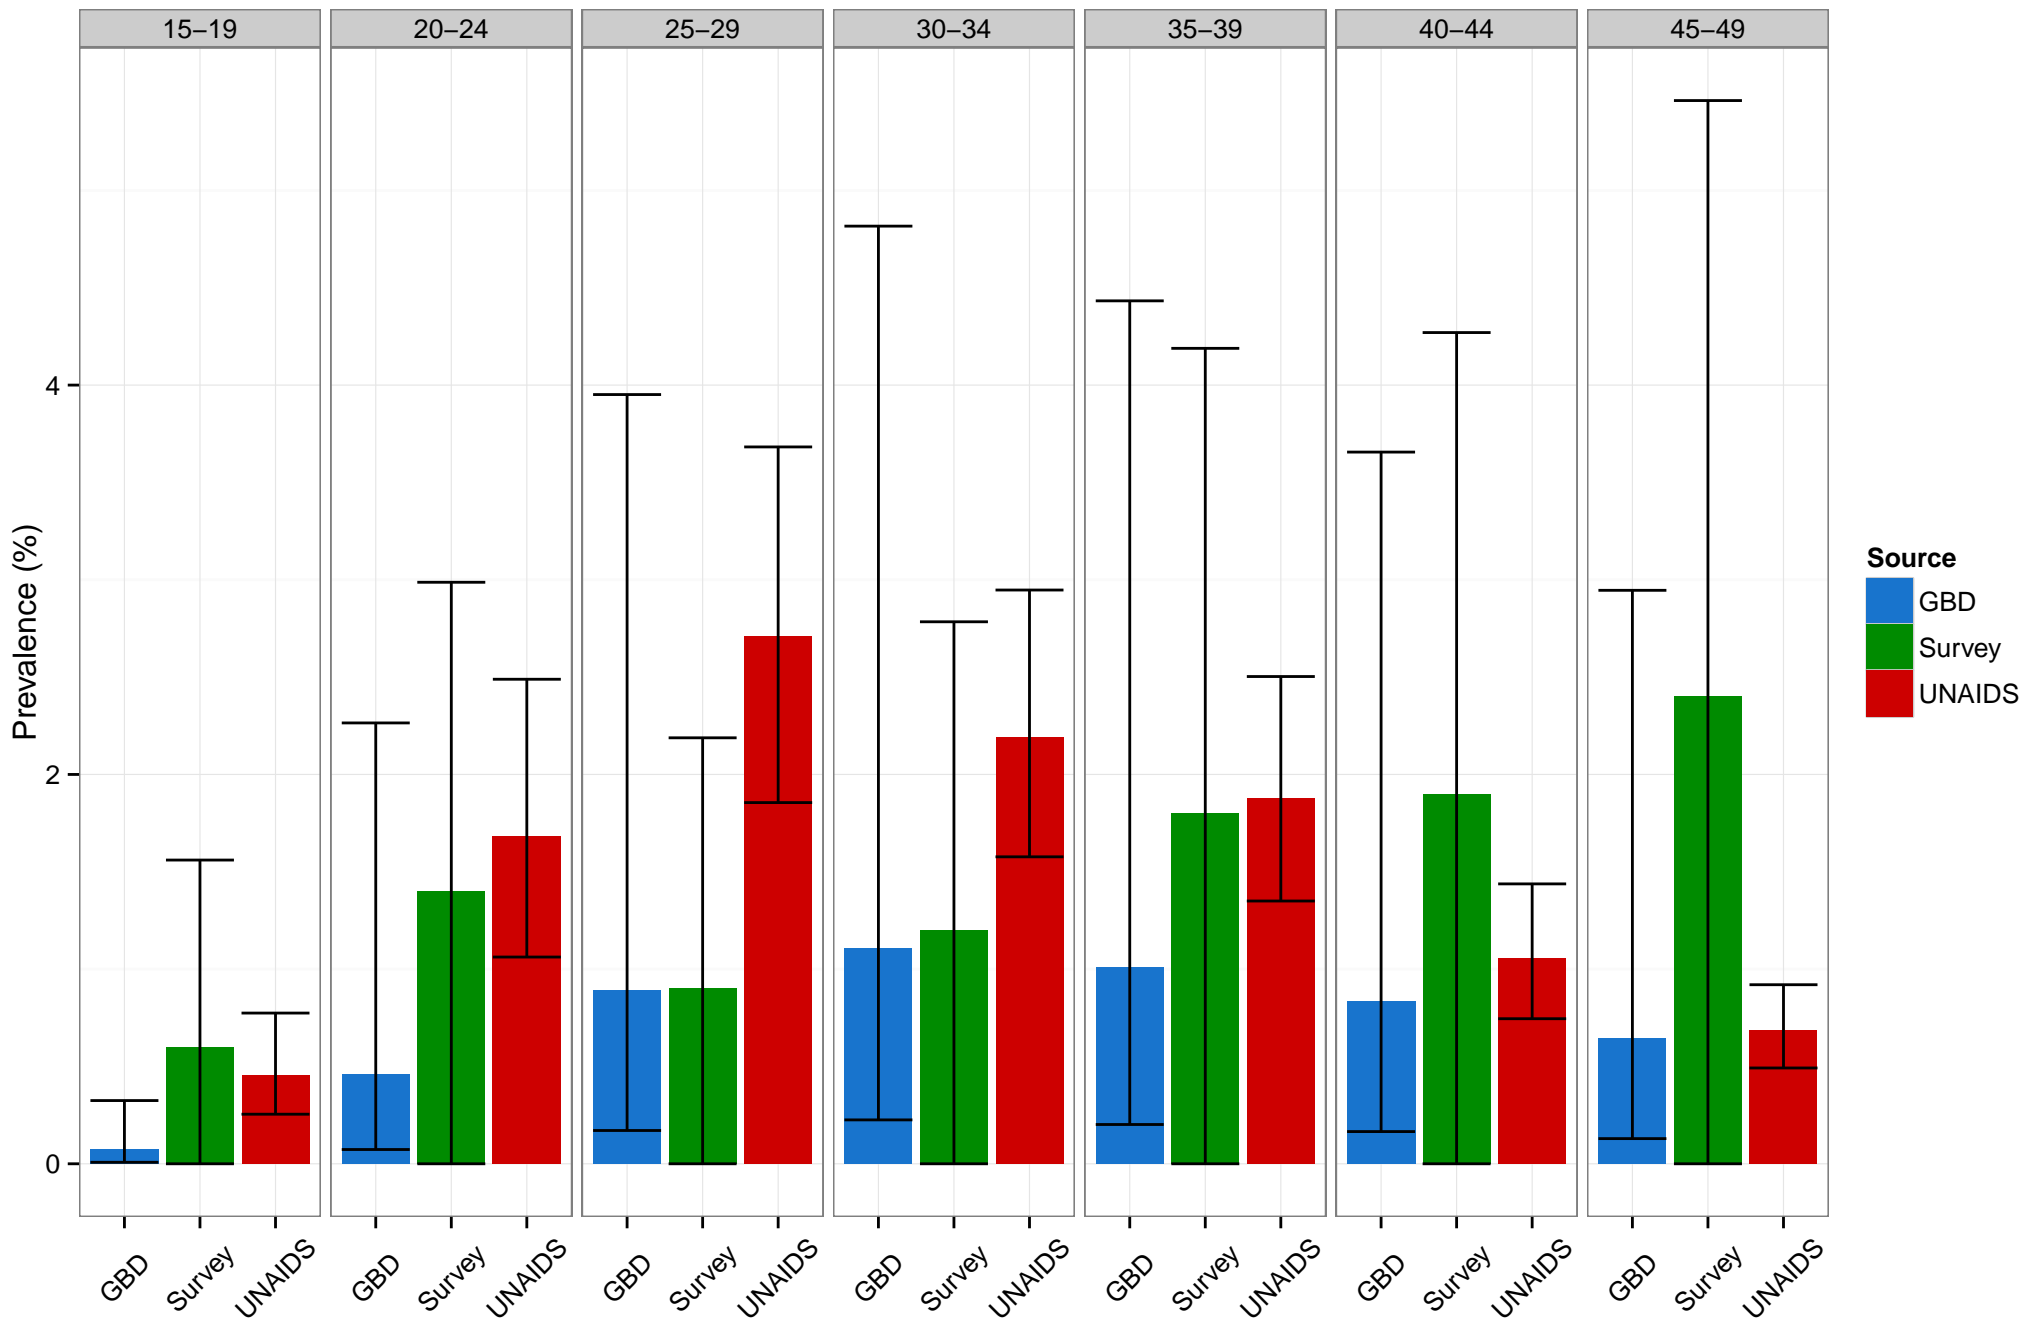

# HIV prevalence comparison to survey estimates by age-group with 95% confidence intervals

SWZ 2007 Males

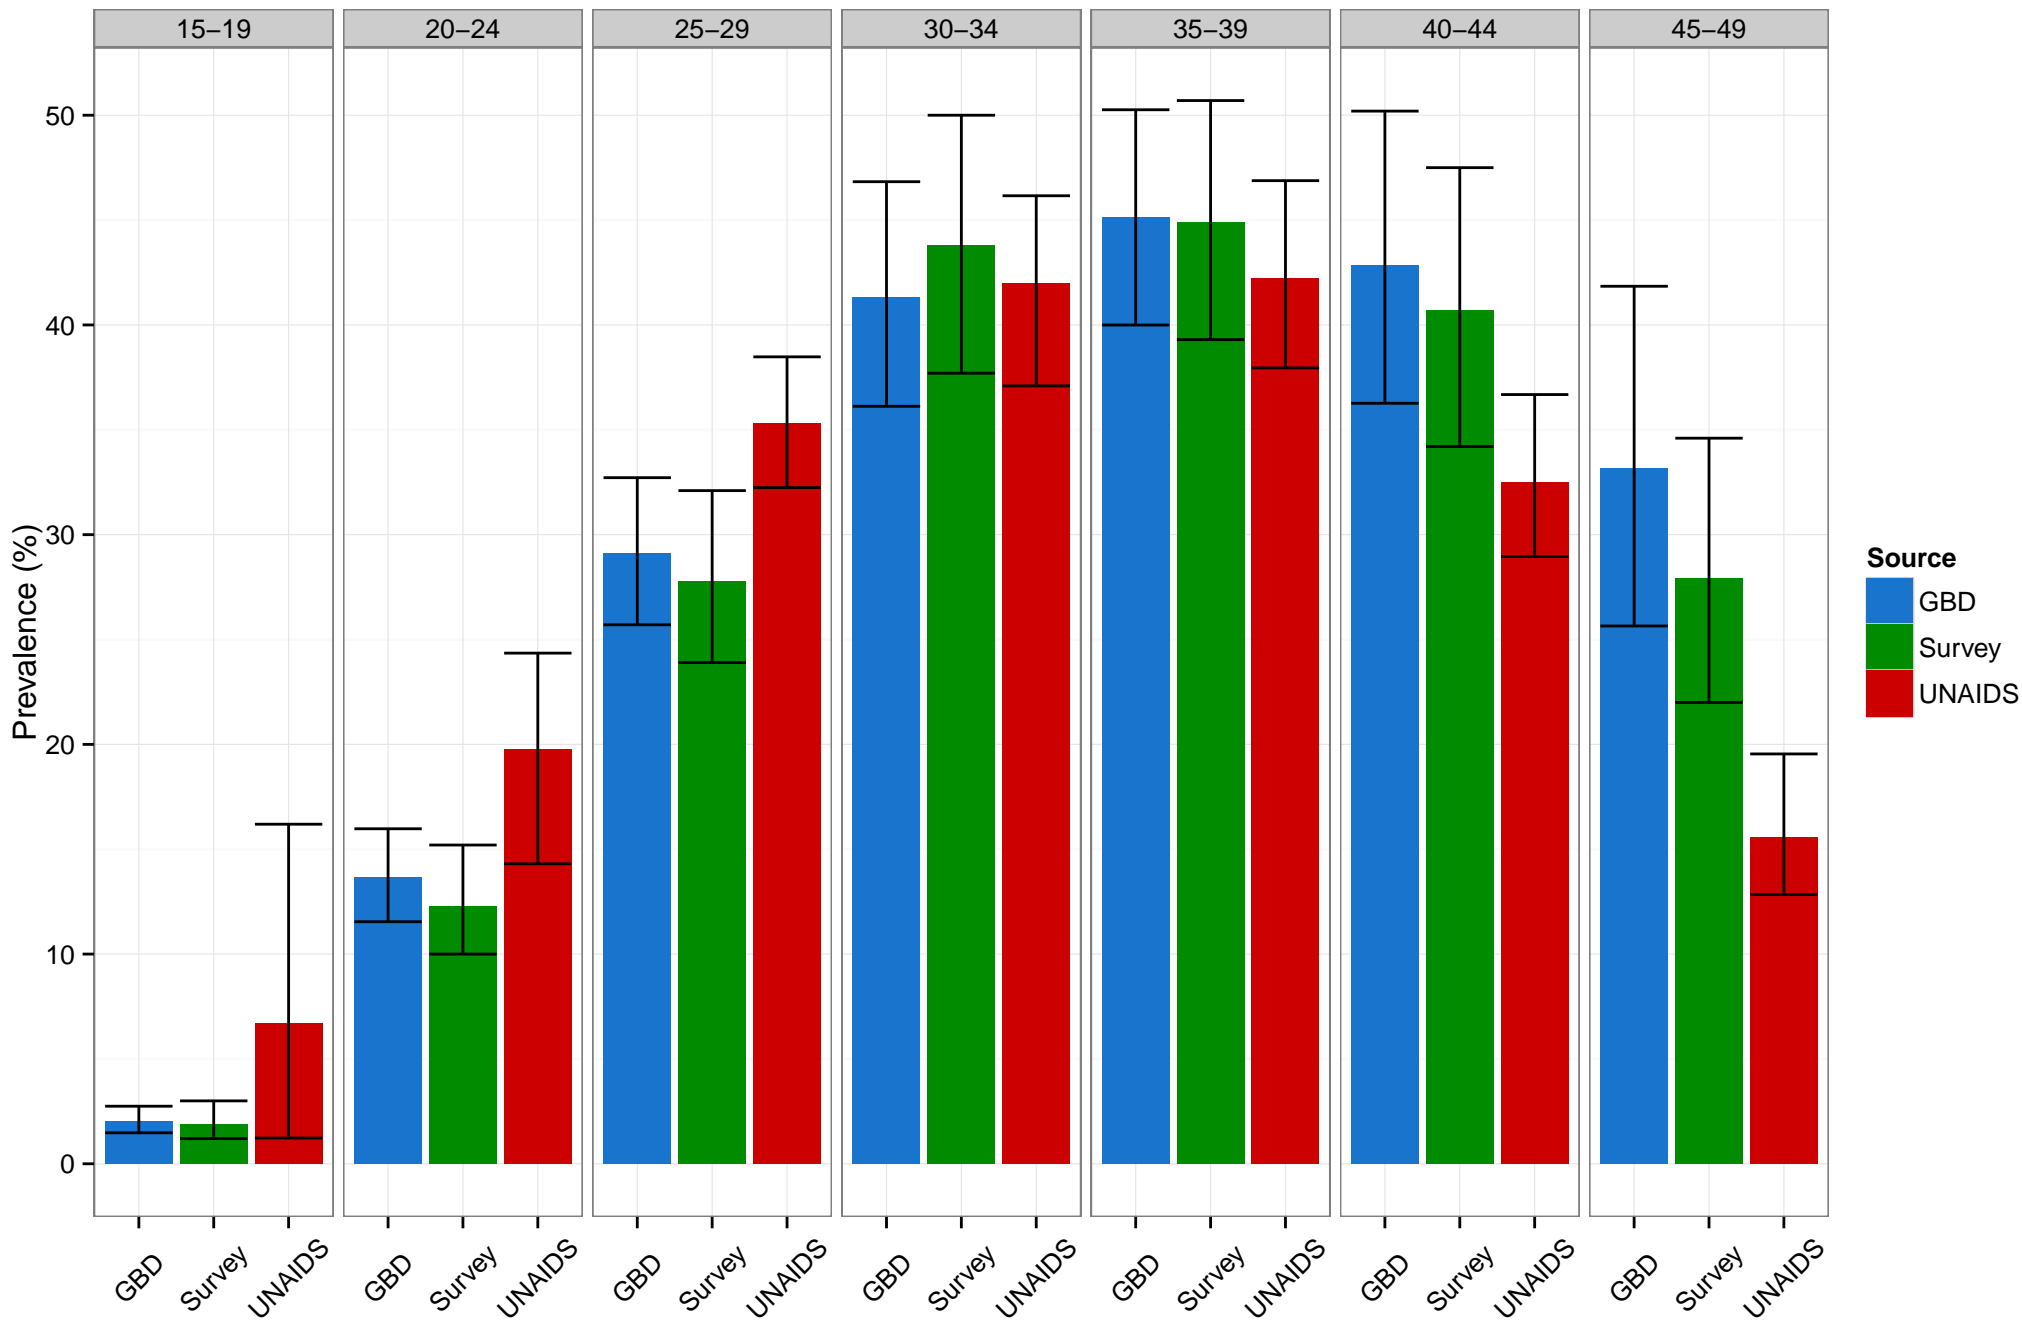

# HIV prevalence comparison to survey estimates by age-group with 95% confidence intervals

SWZ 2007 Females

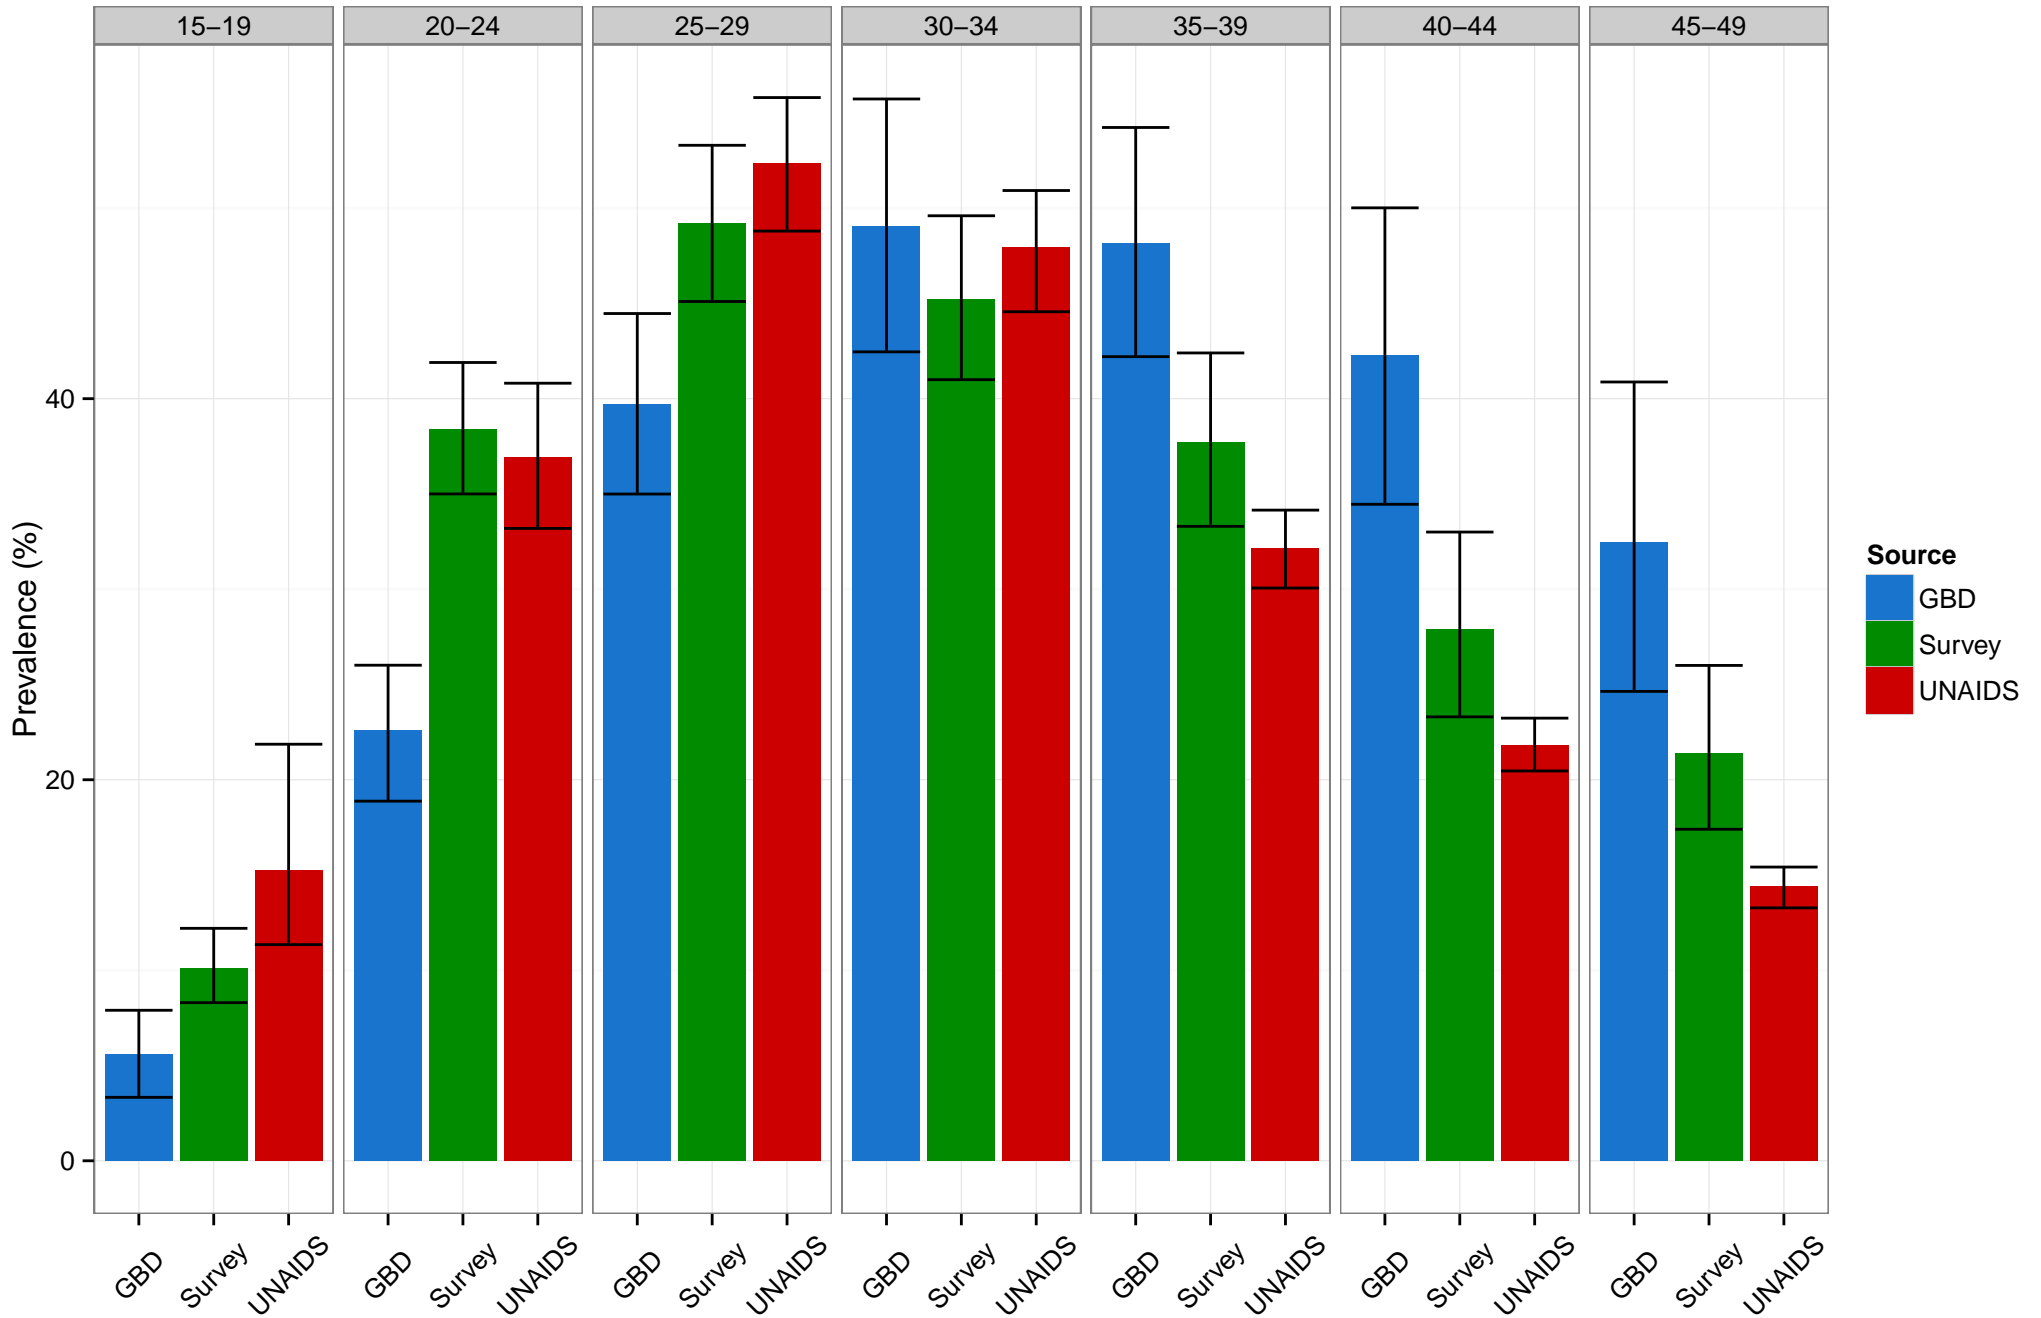



# HIV prevalence comparison to survey estimates by age-group with 95% confidence intervals

TZA 2003–2004 Males

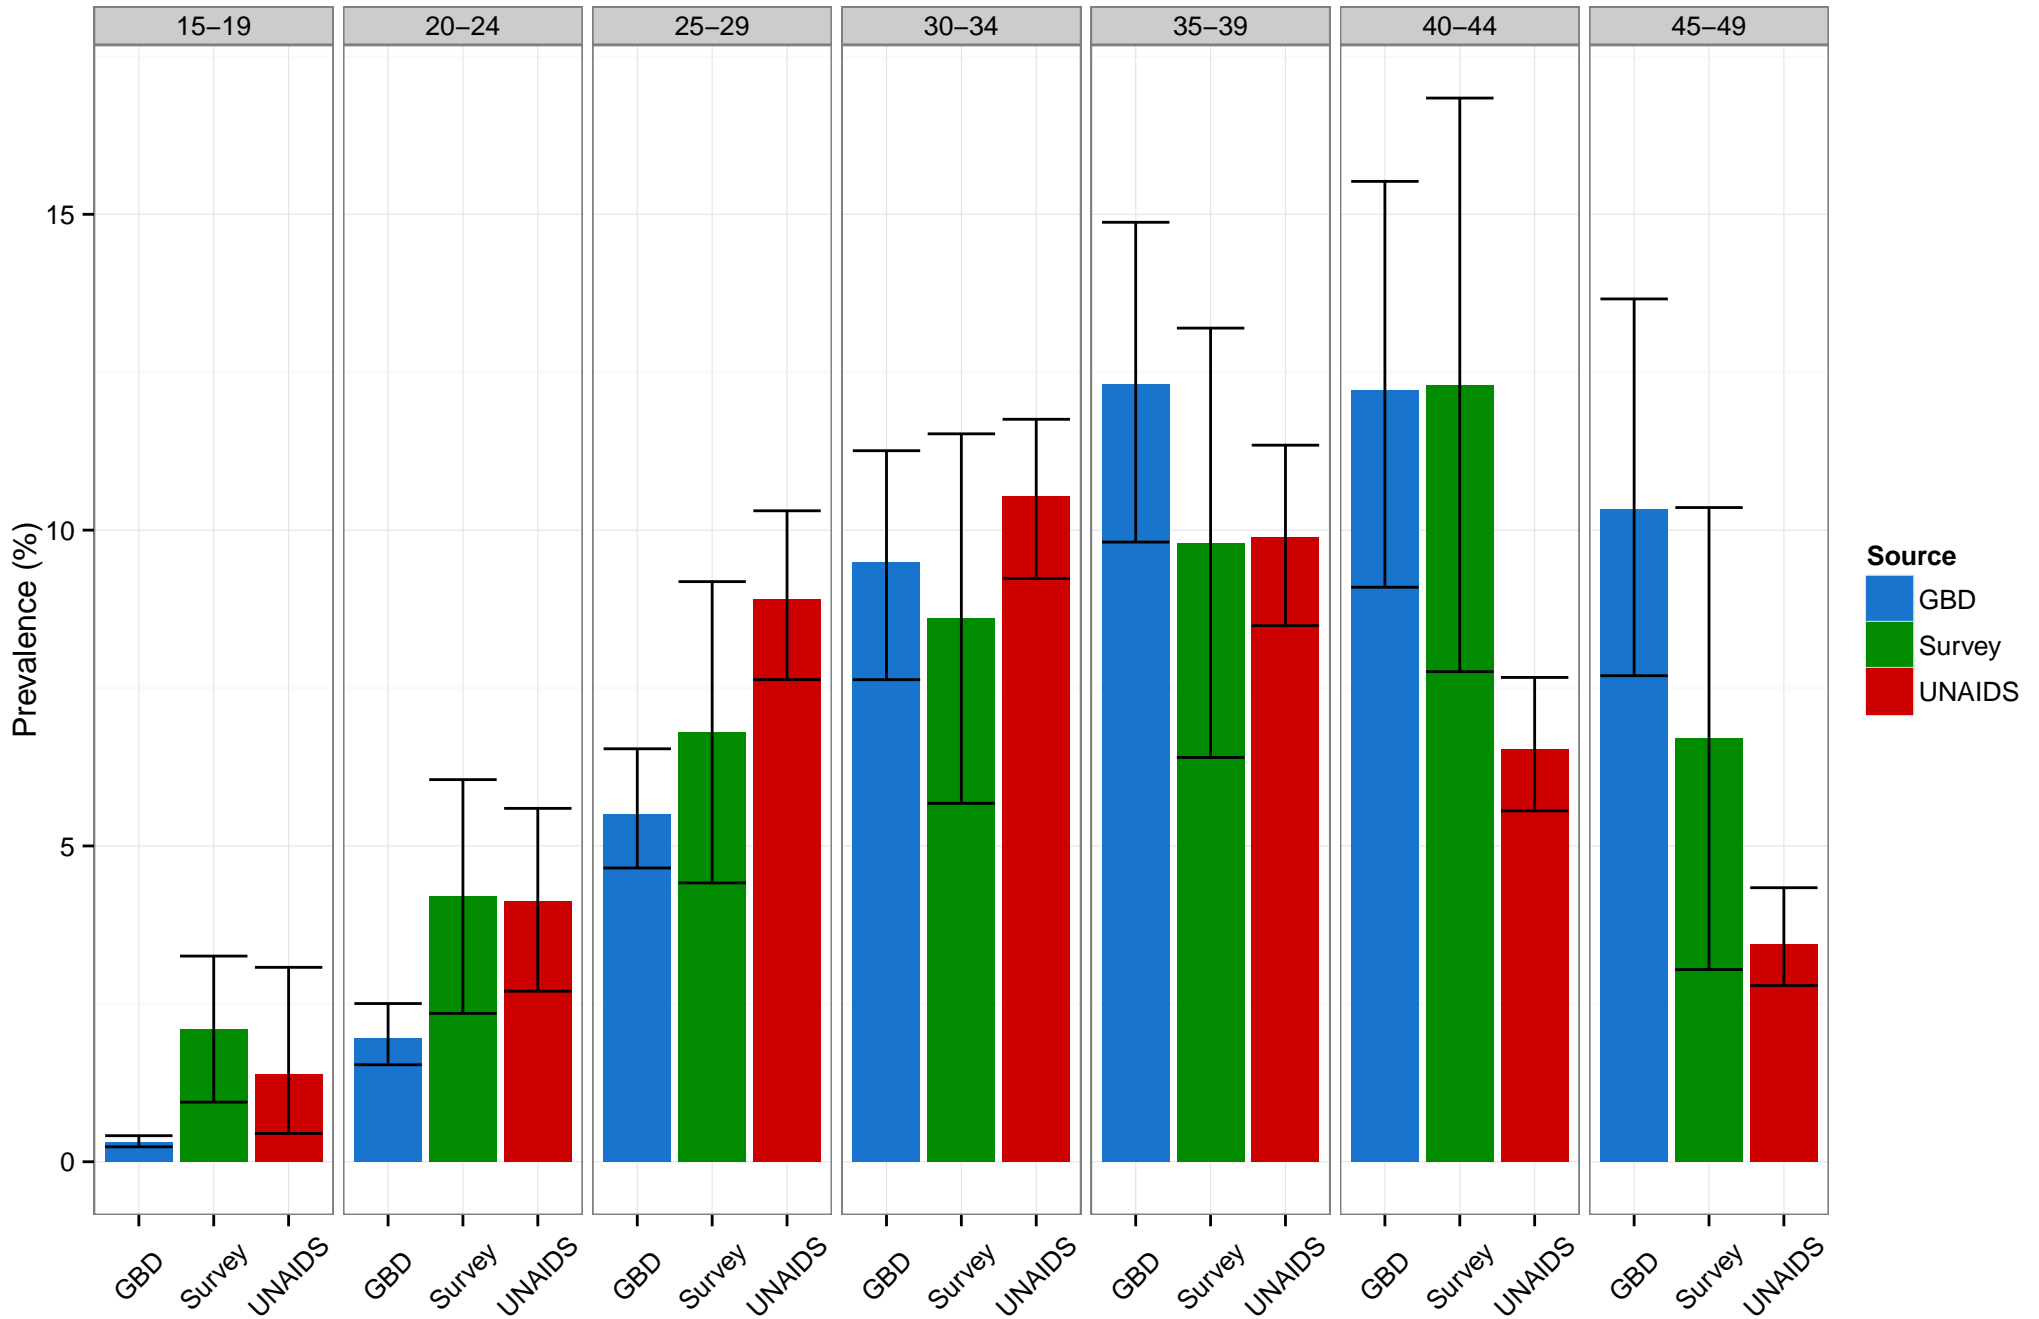

# HIV prevalence comparison to survey estimates by age-group with 95% confidence intervals

TZA 2003–2004 Females

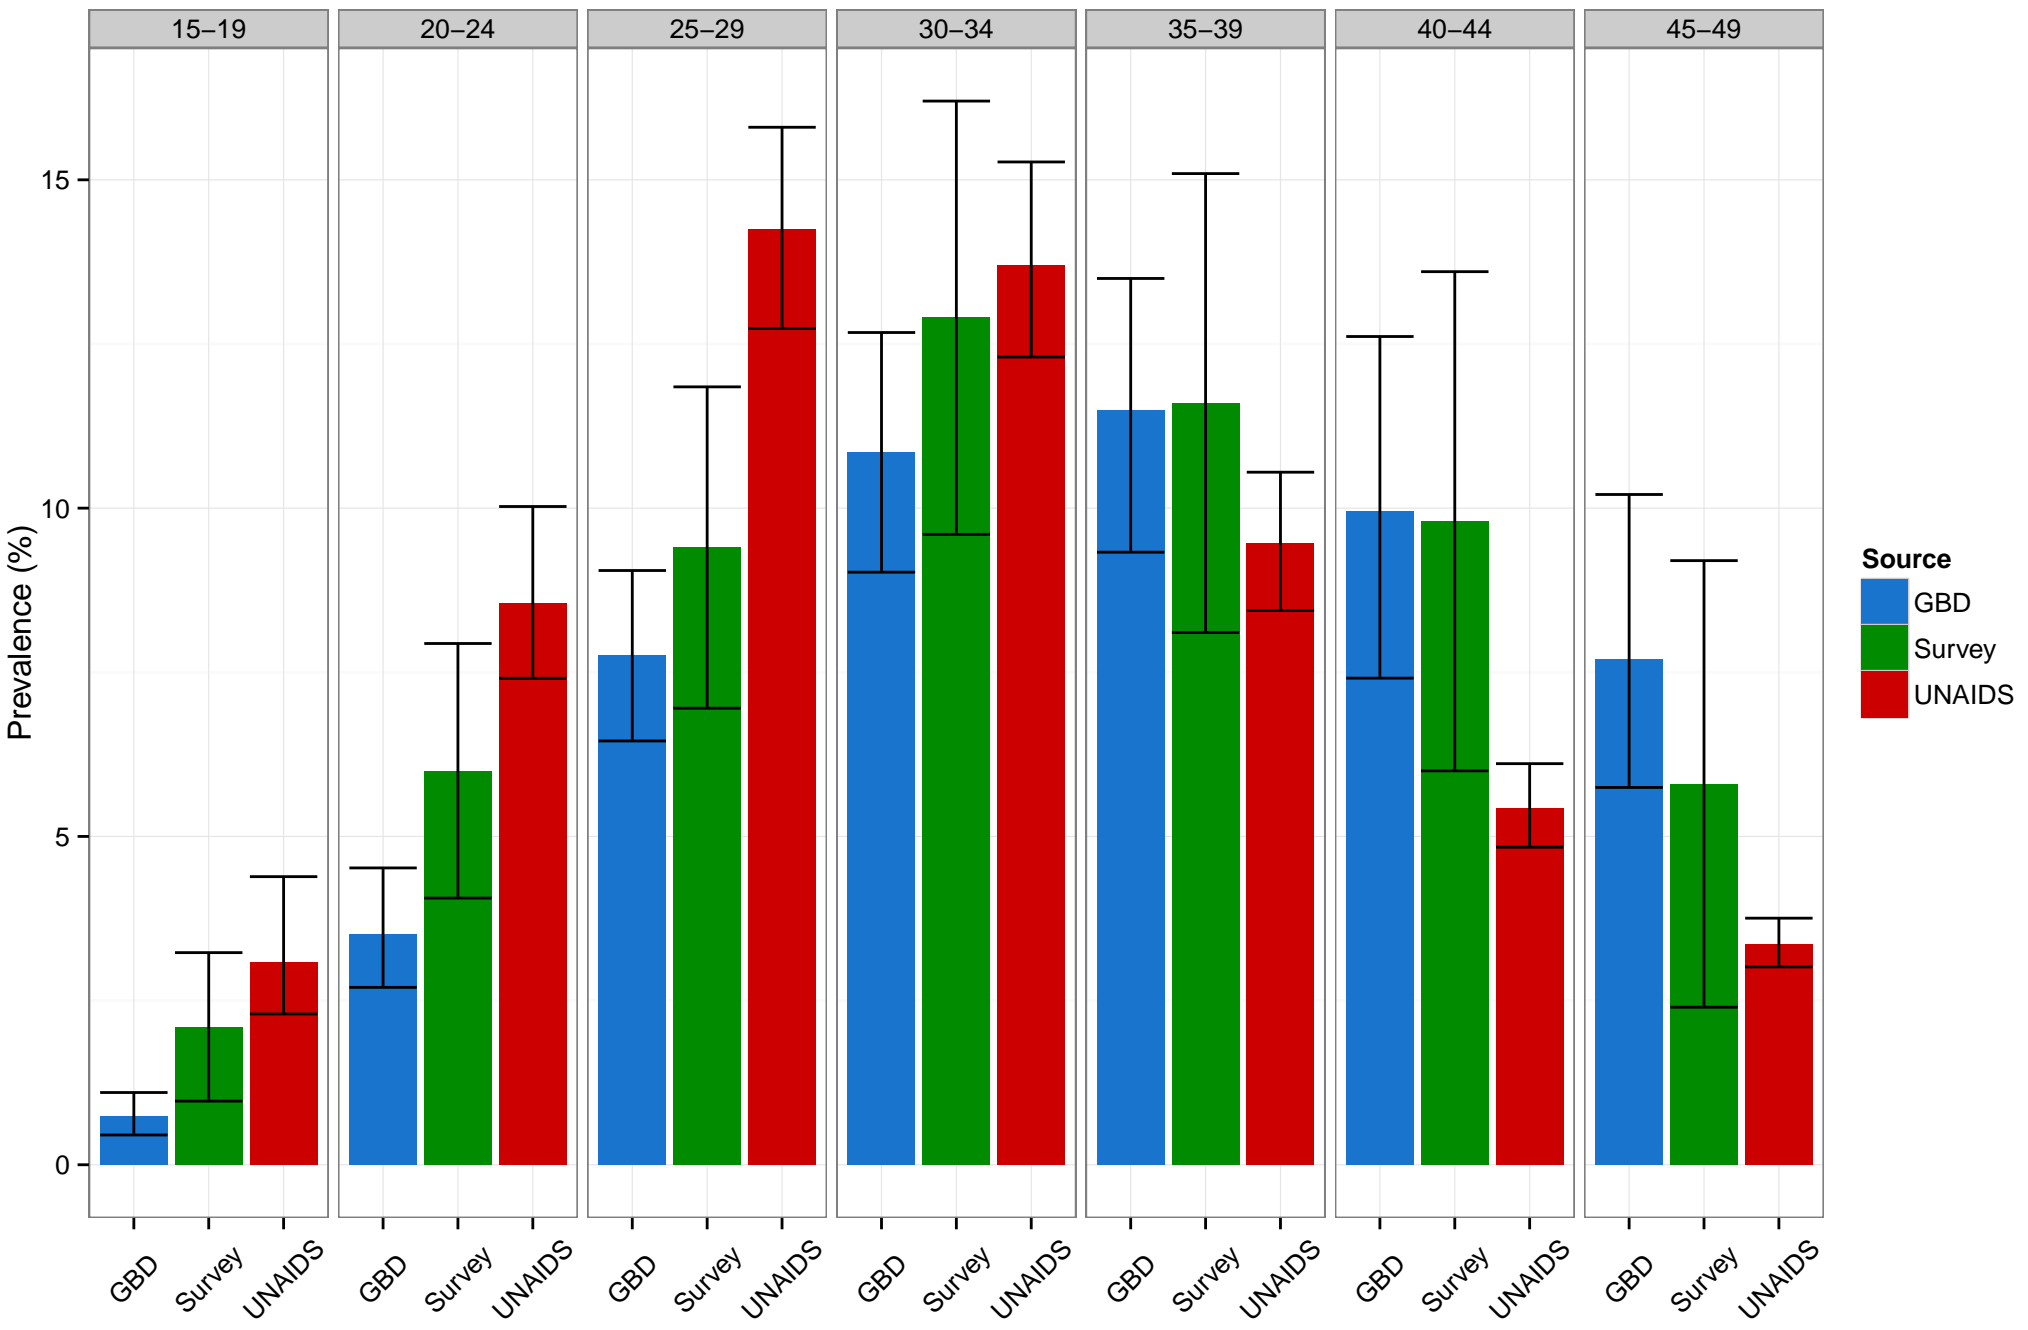

# HIV prevalence comparison to survey estimates by age-group with 95% confidence intervals

TZA 2007–2008 Males

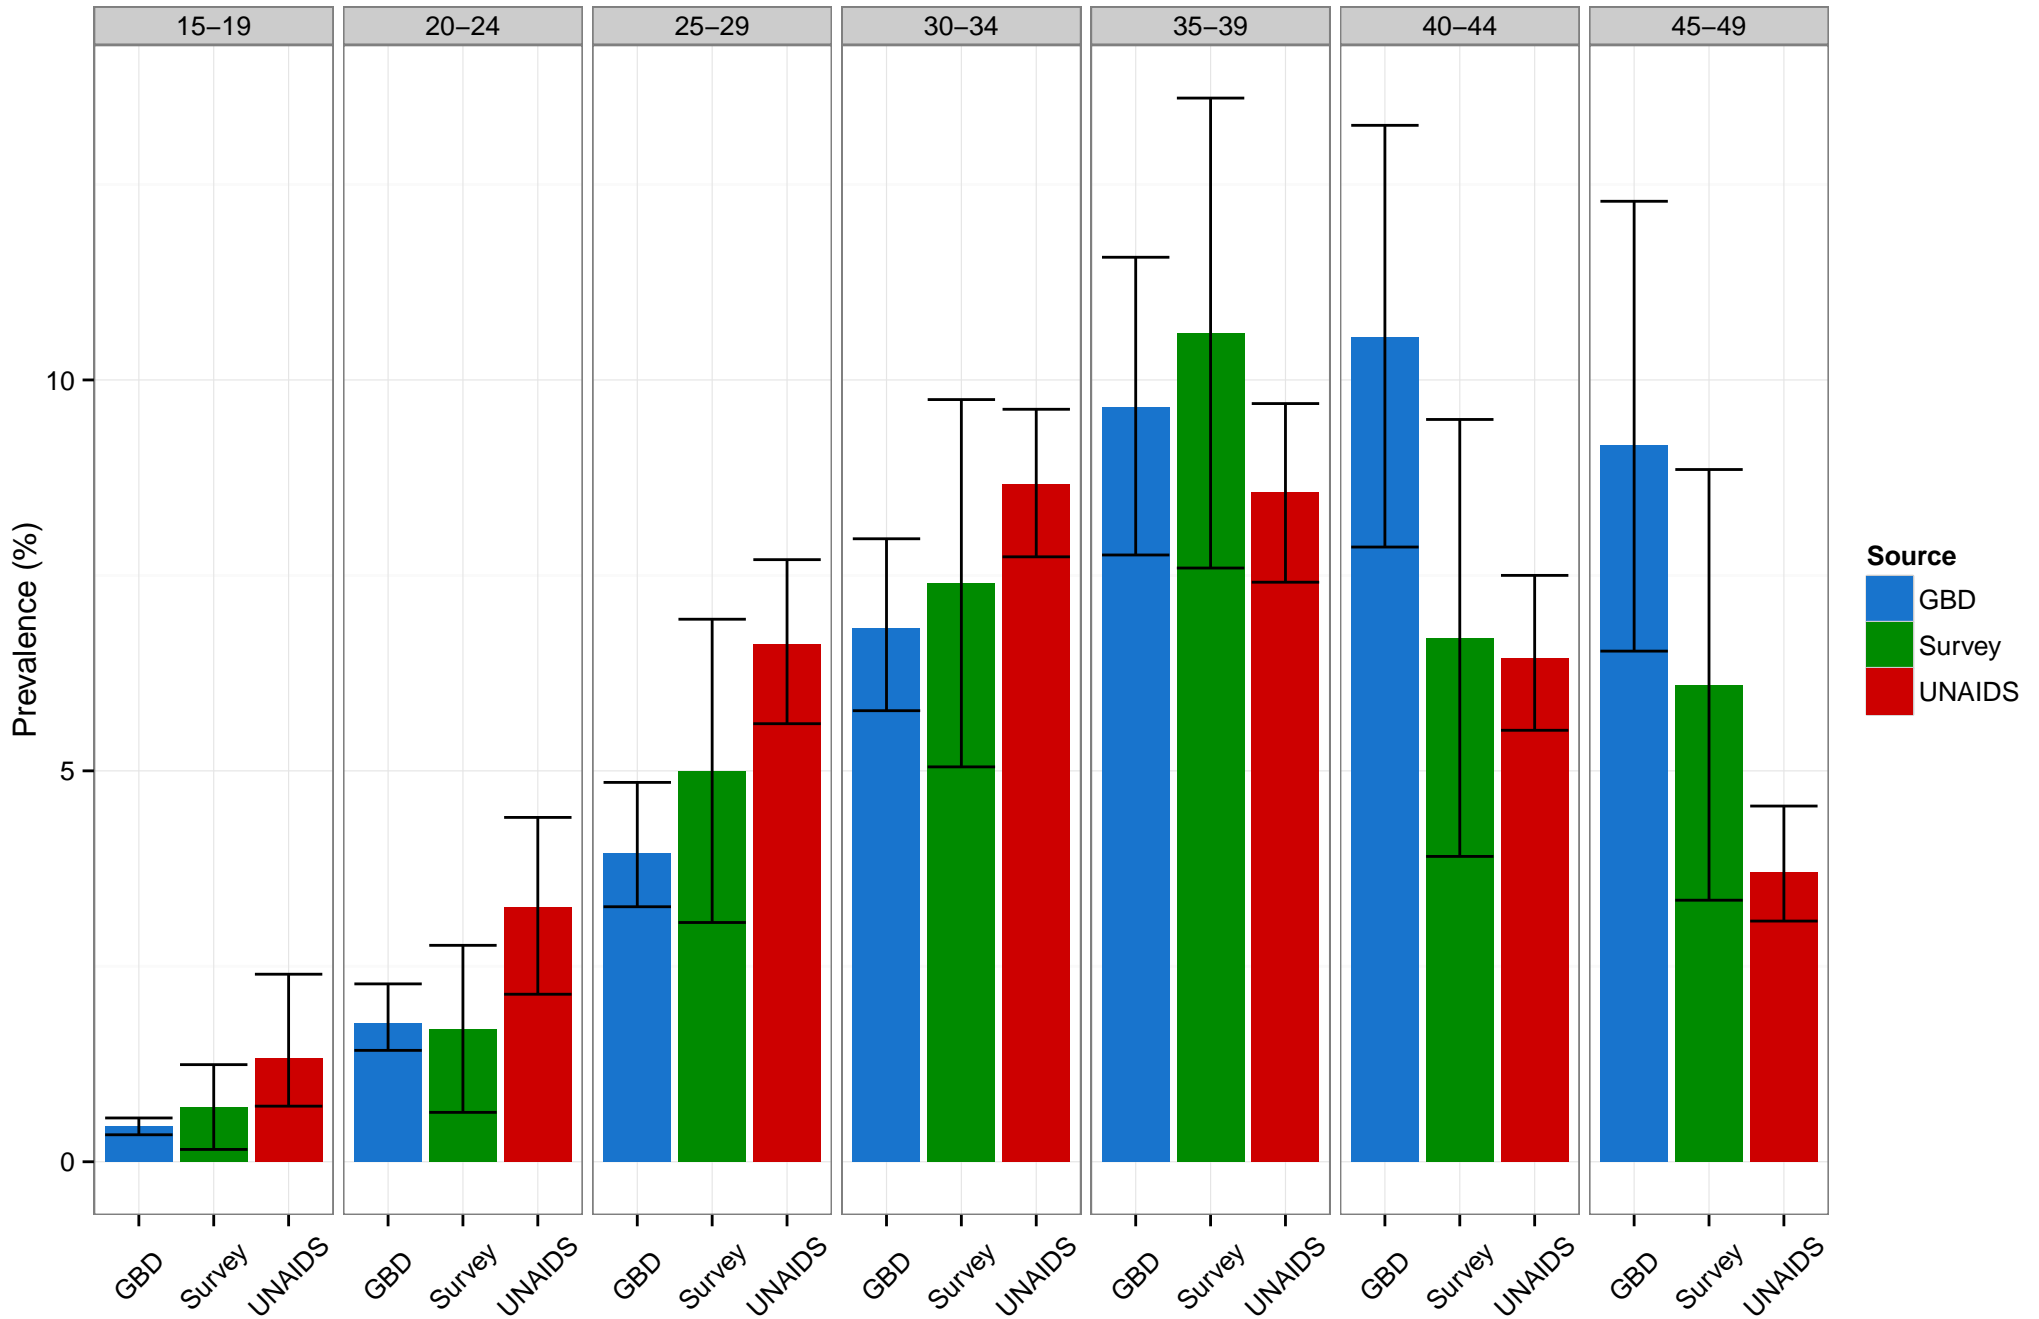

# HIV prevalence comparison to survey estimates by age-group with 95% confidence intervals

TZA 2007–2008 Females

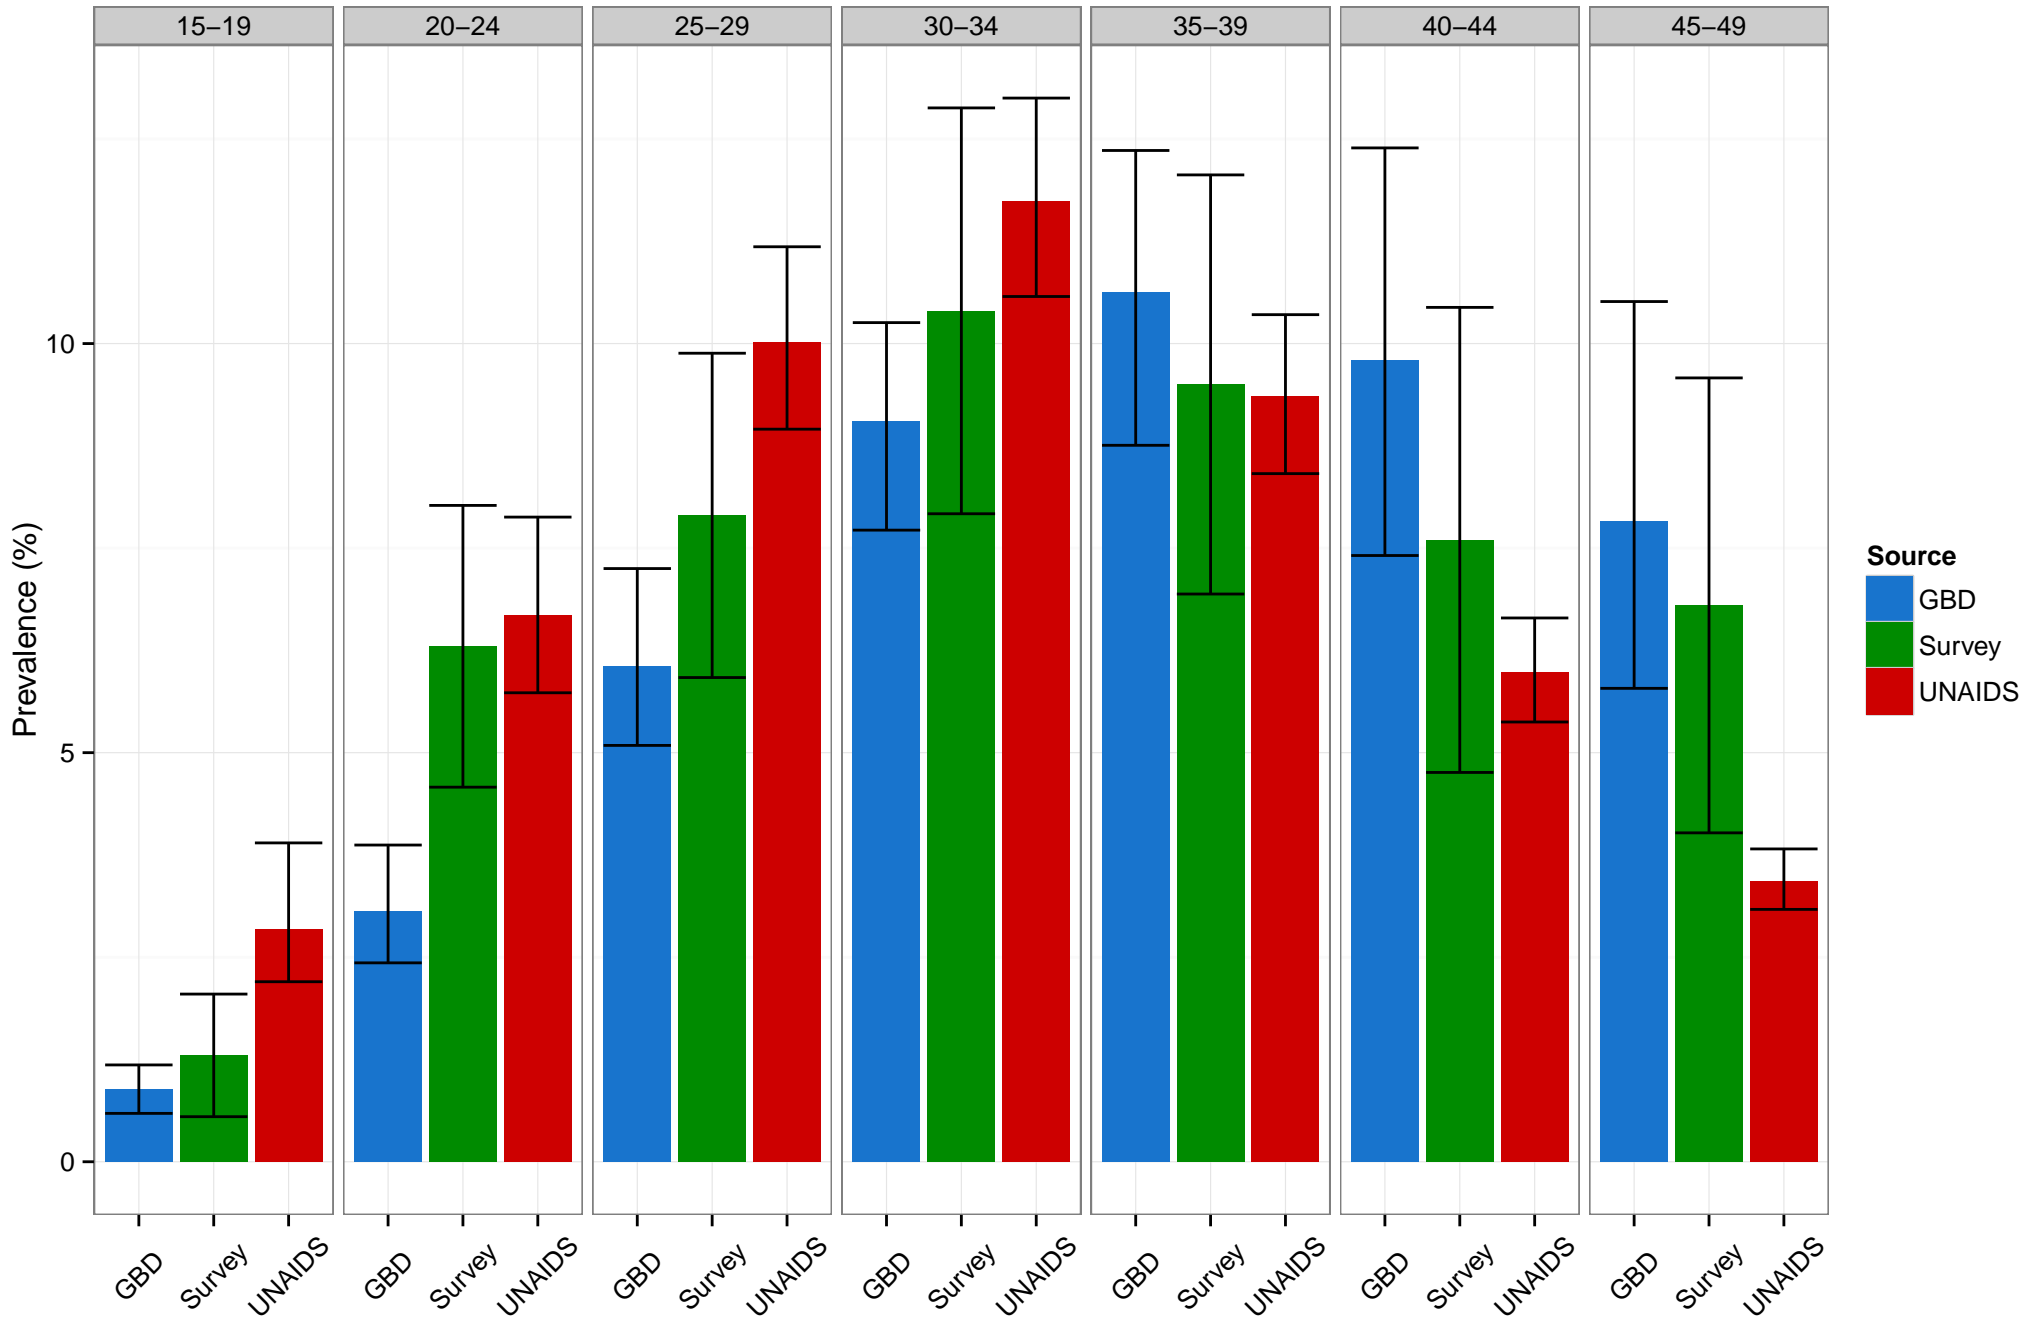

# HIV prevalence comparison to survey estimates by age-group with 95% confidence intervals

TZA 2011–2012 Males

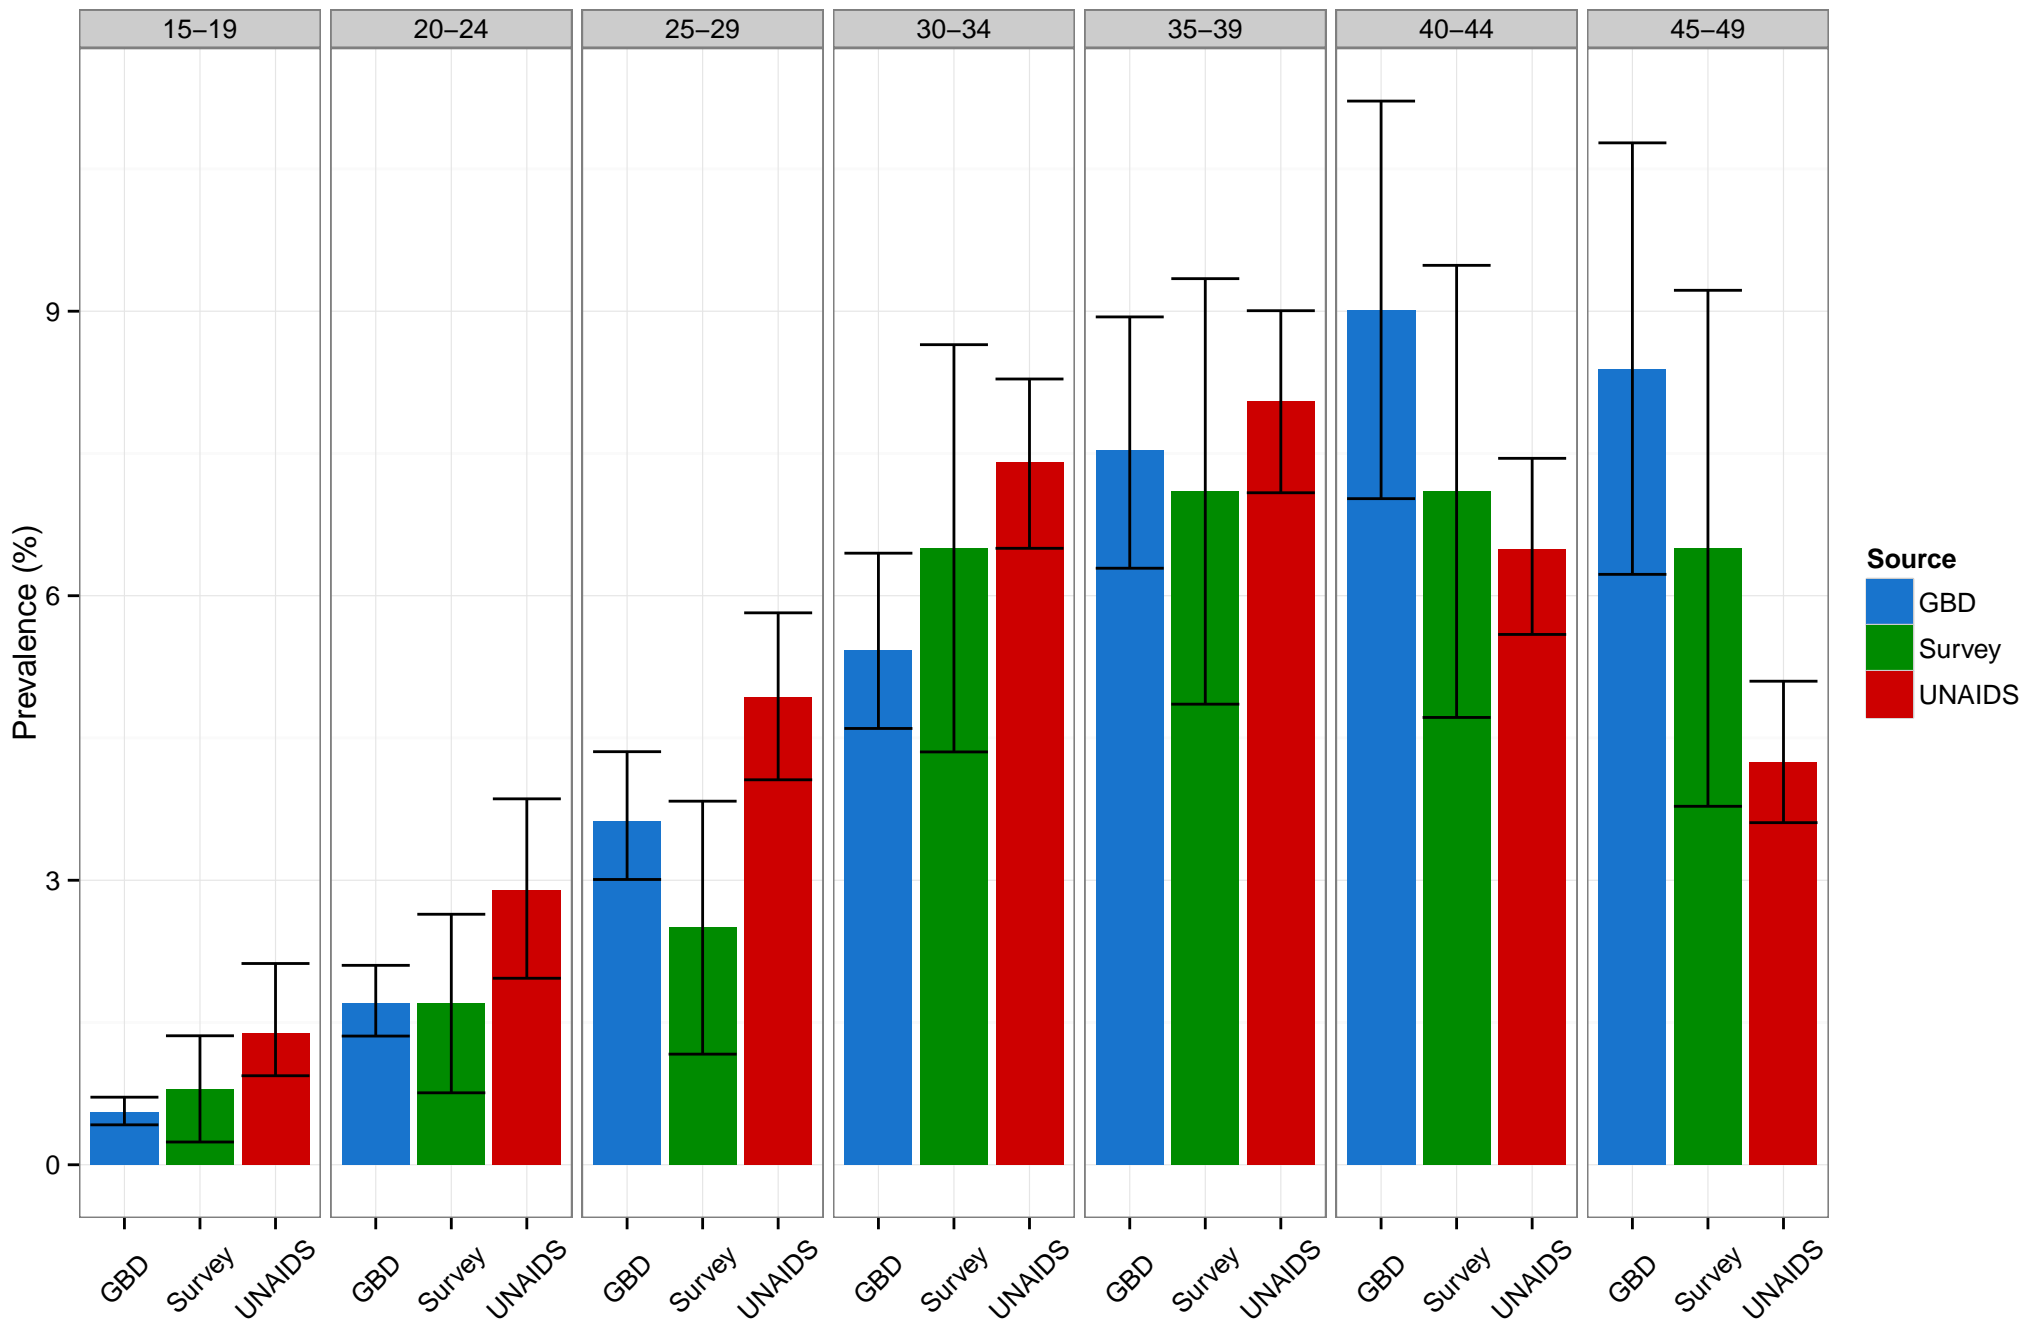

# HIV prevalence comparison to survey estimates by age-group with 95% confidence intervals

TZA 2011–2012 Females

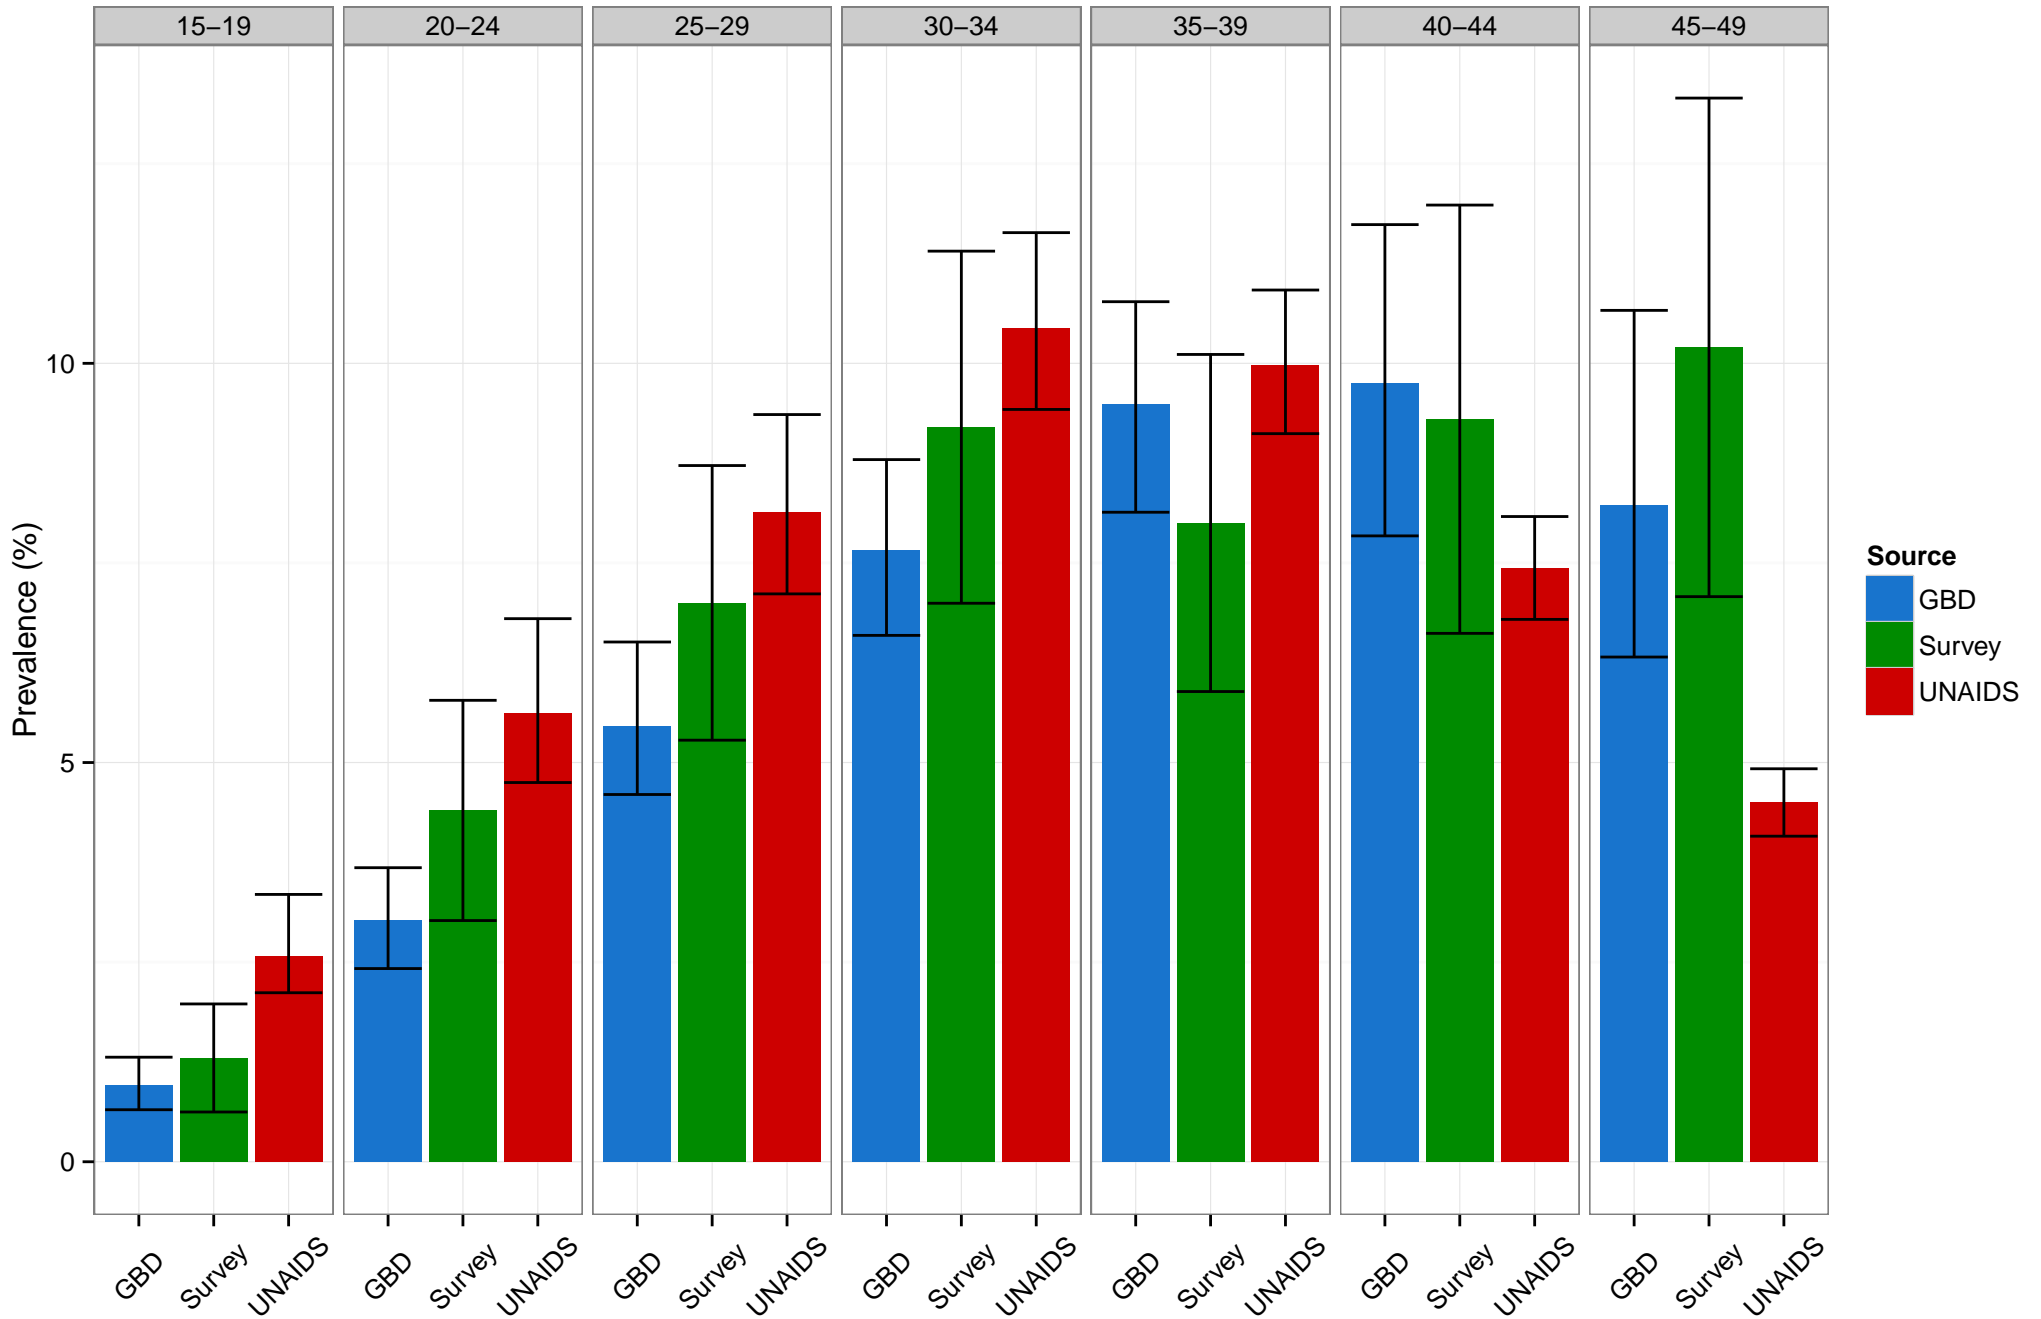

# HIV prevalence comparison to survey estimates by age-group with 95% confidence intervals

UGA 2004–2005 Males

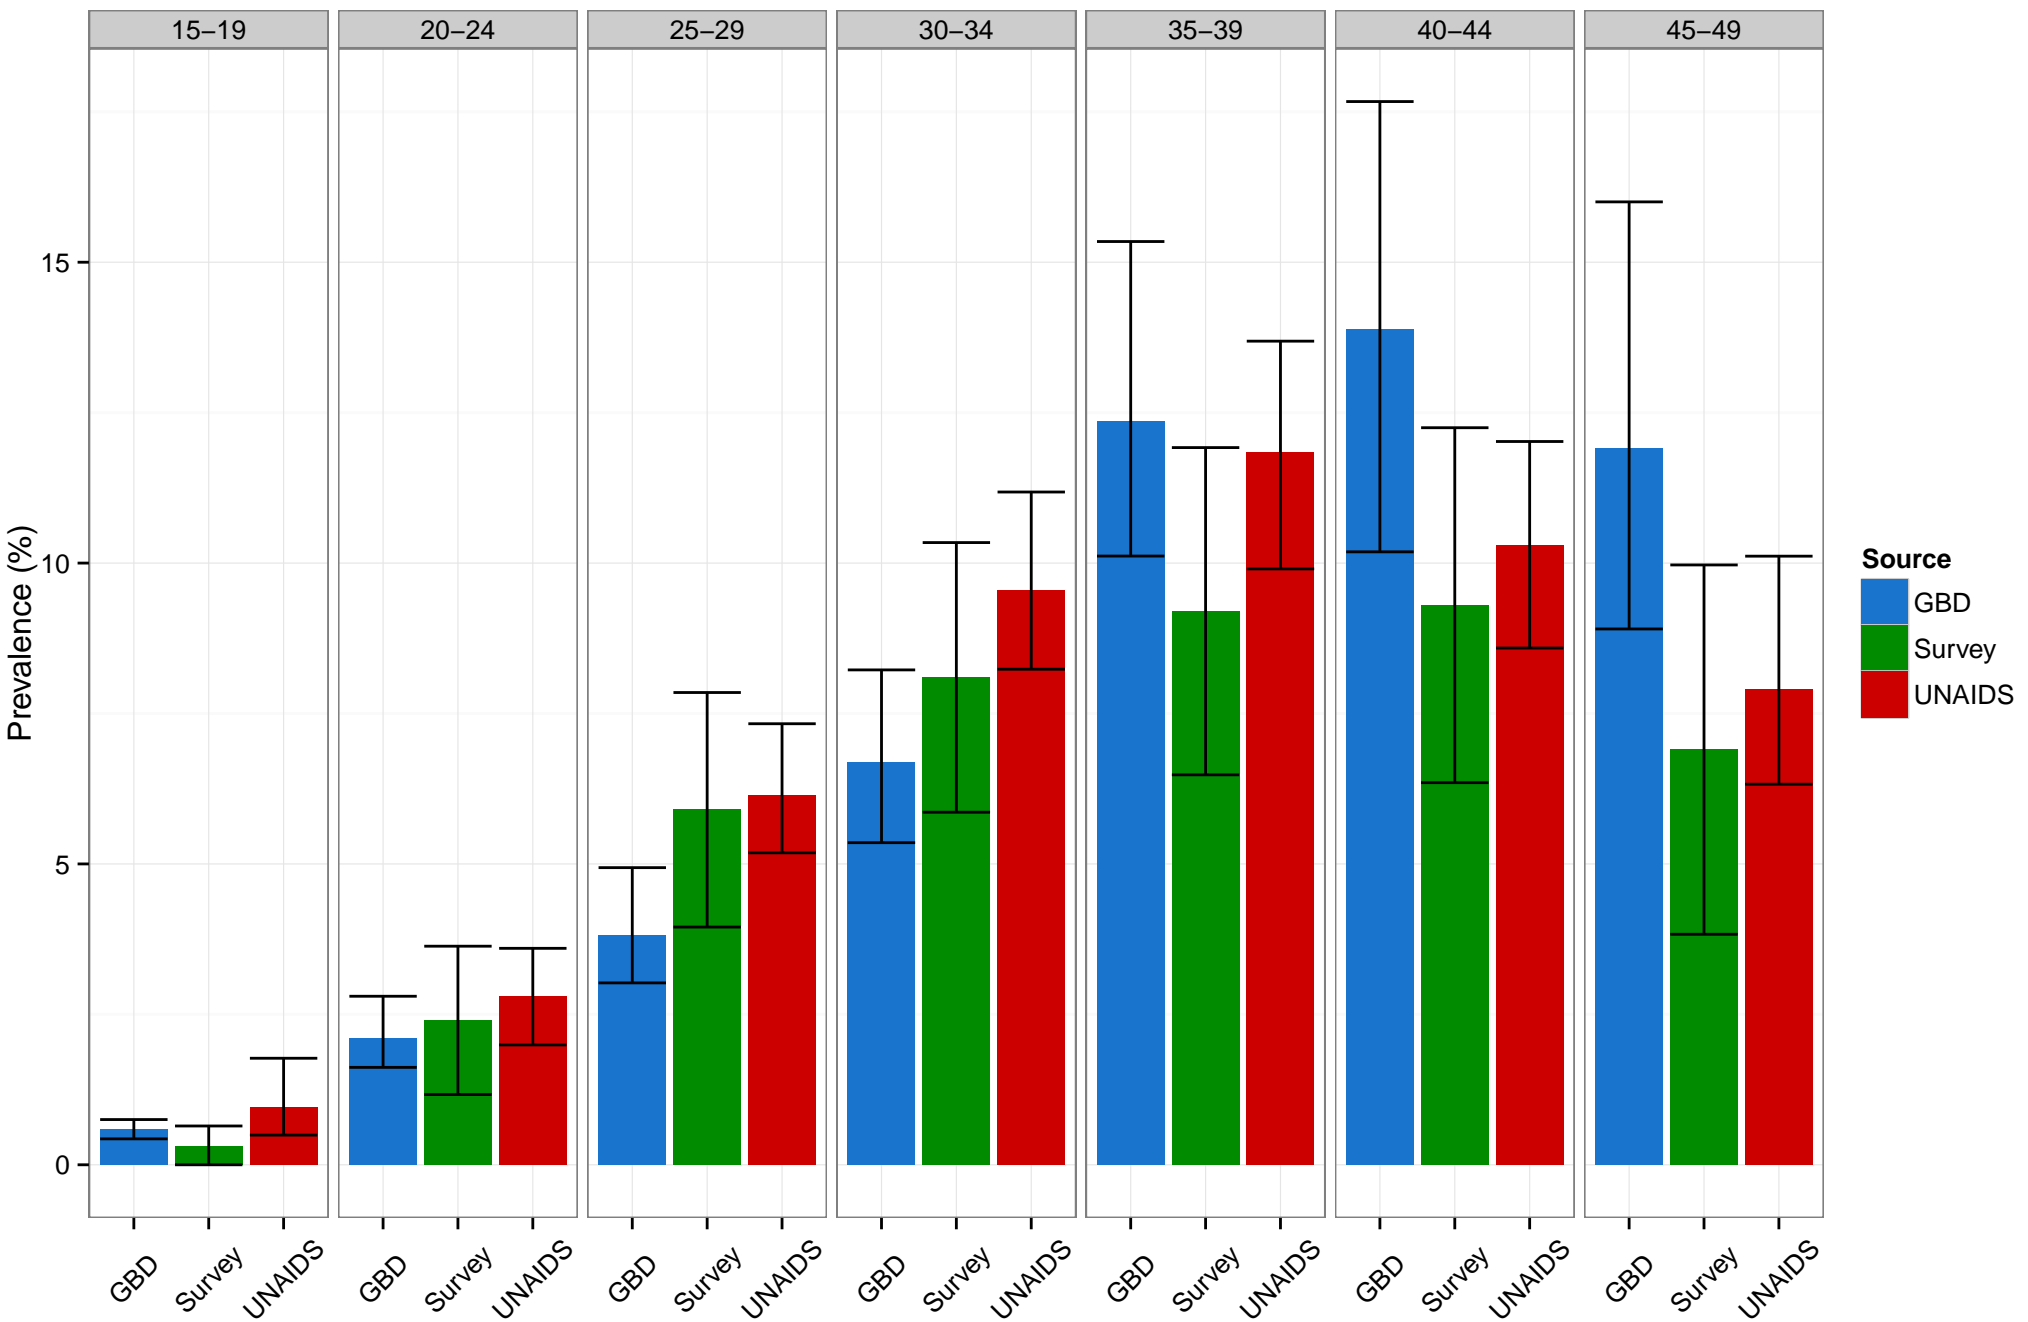

# HIV prevalence comparison to survey estimates by age-group with 95% confidence intervals

UGA 2004–2005 Females

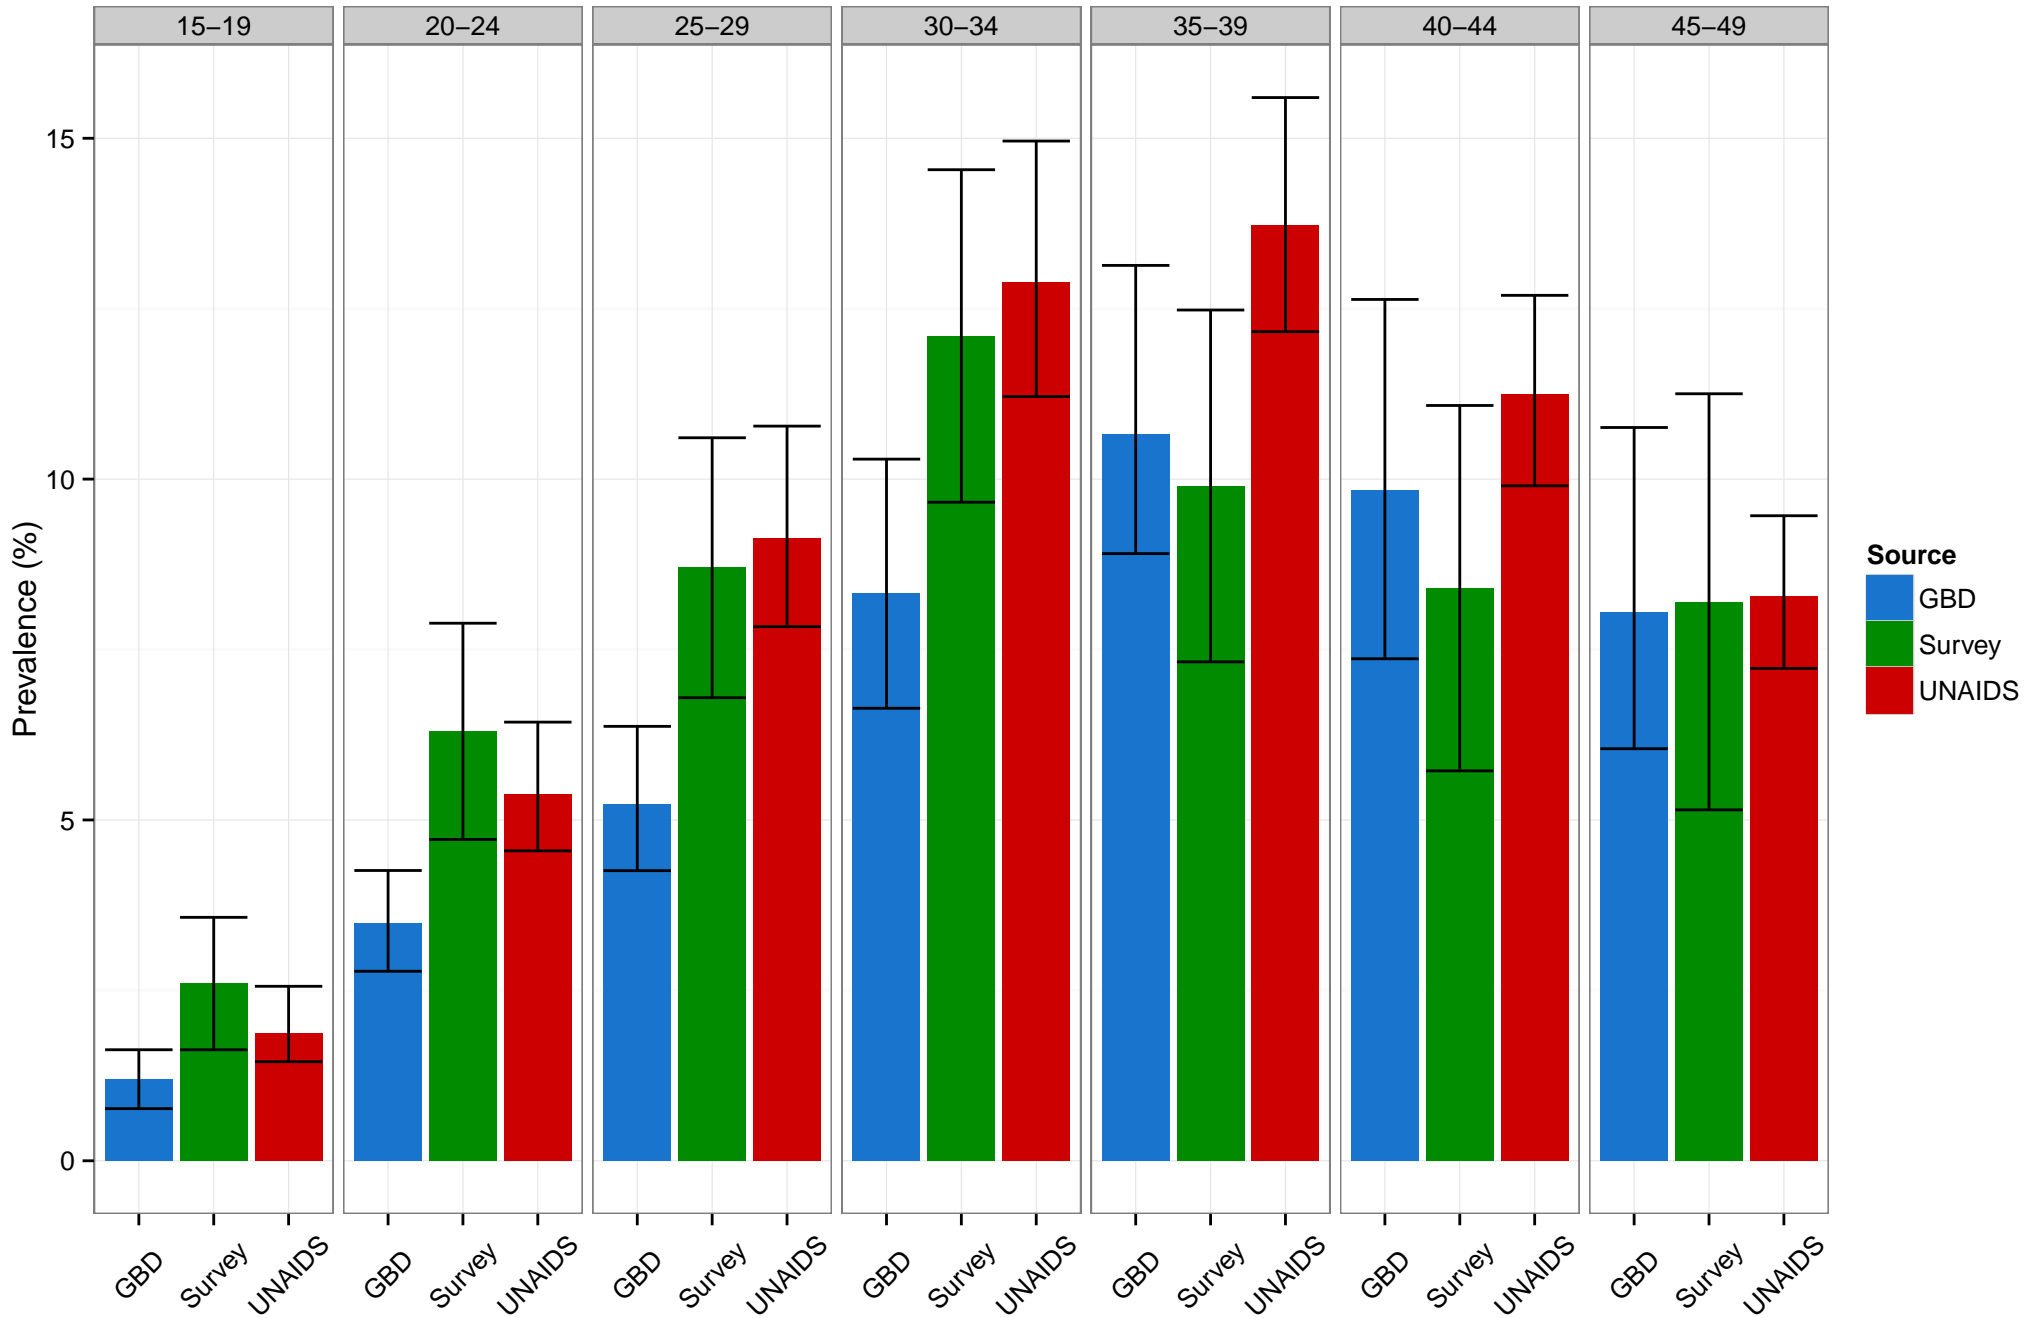



# HIV prevalence comparison to survey estimates by age-group with 95% confidence intervals

UGA 2011 Males

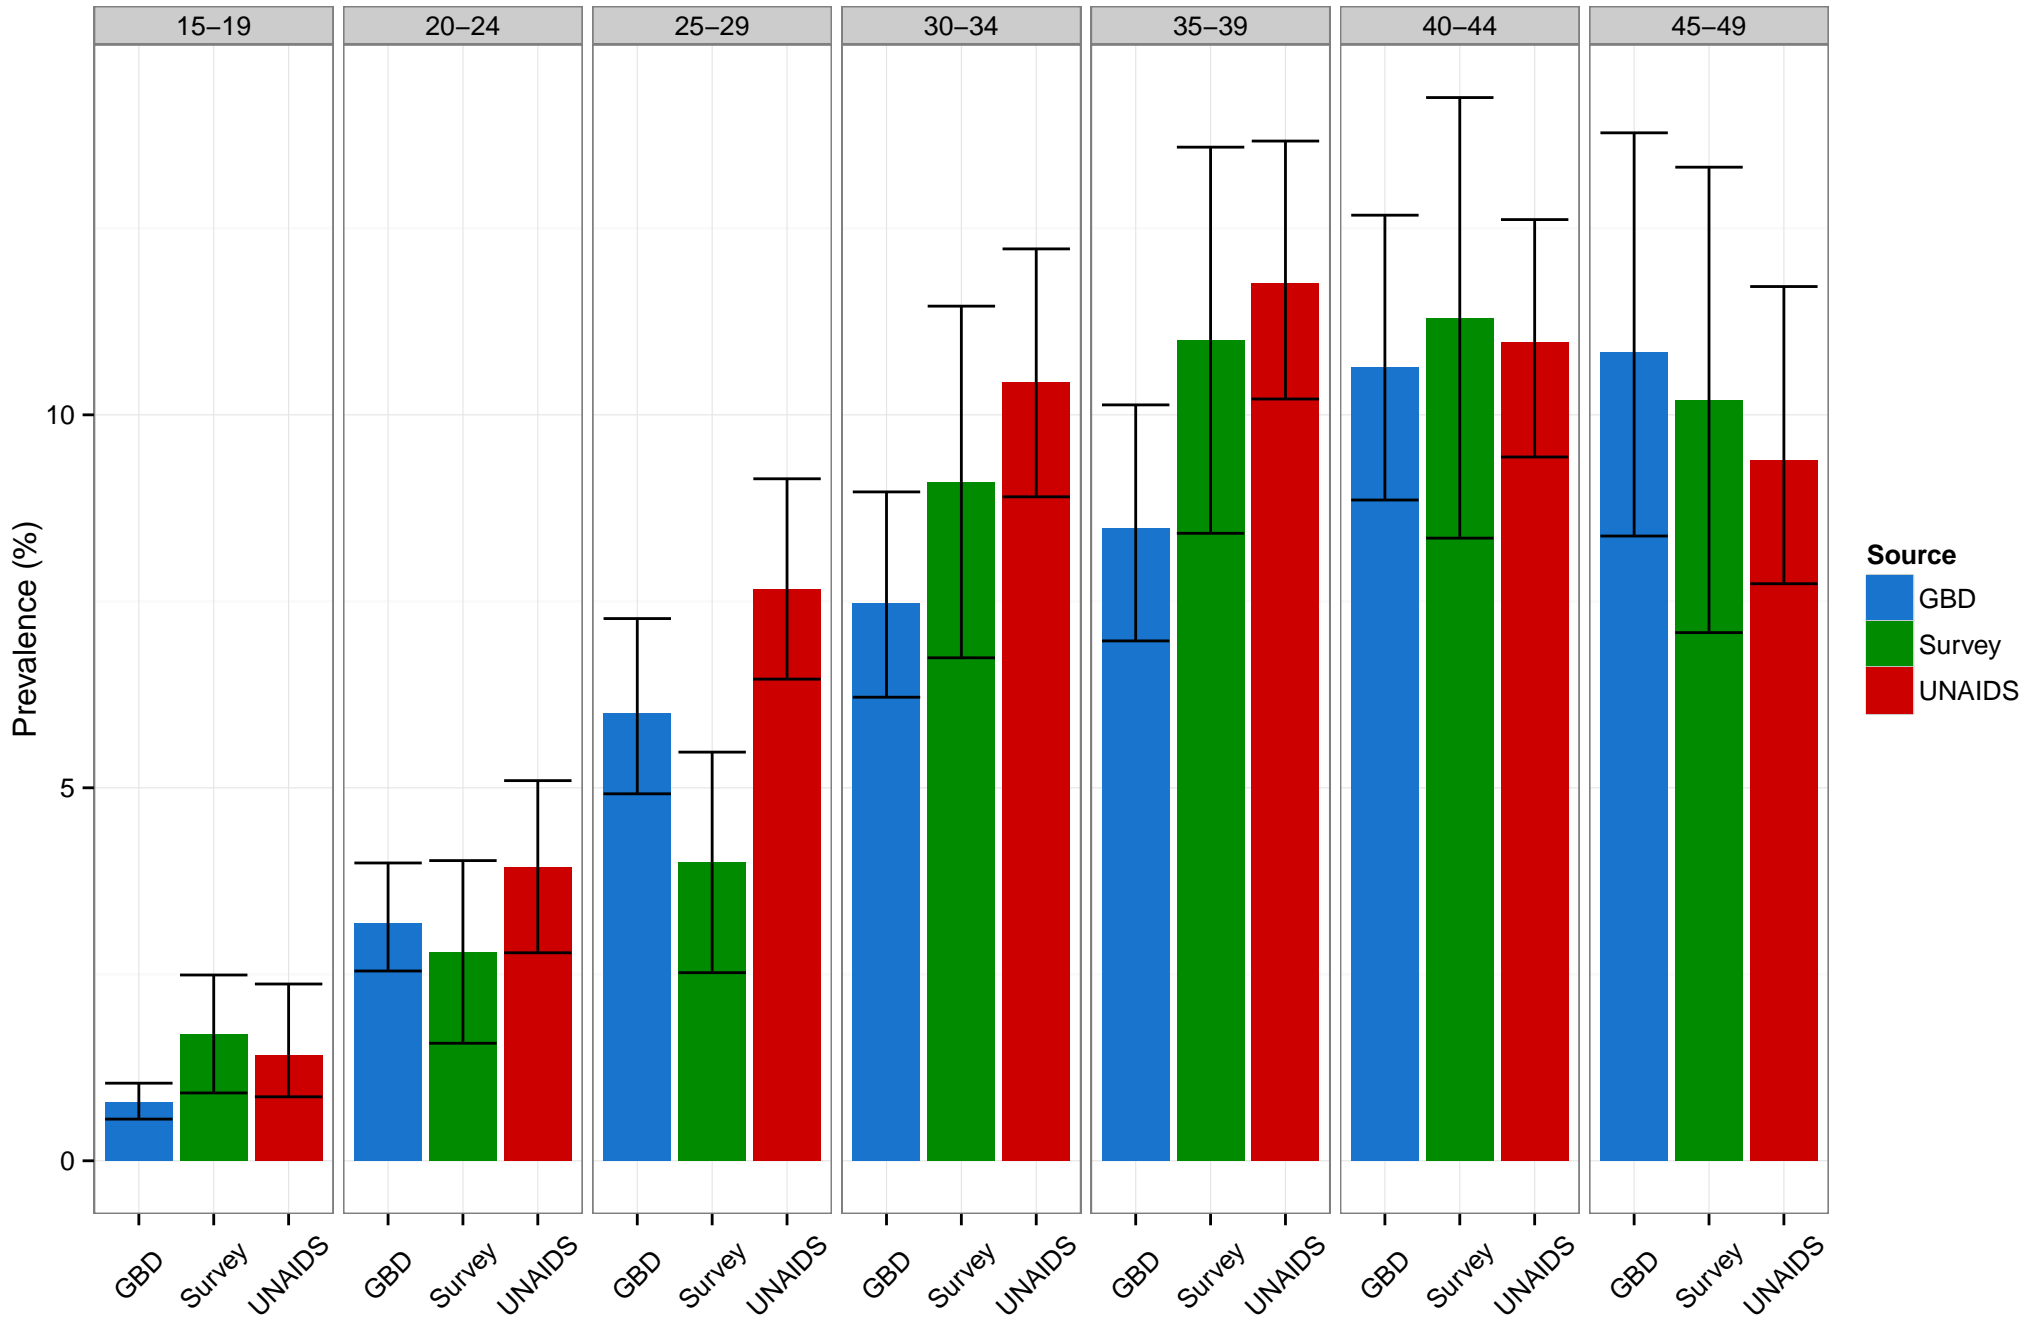

# HIV prevalence comparison to survey estimates by age-group with 95% confidence intervals

UGA 2011 Females

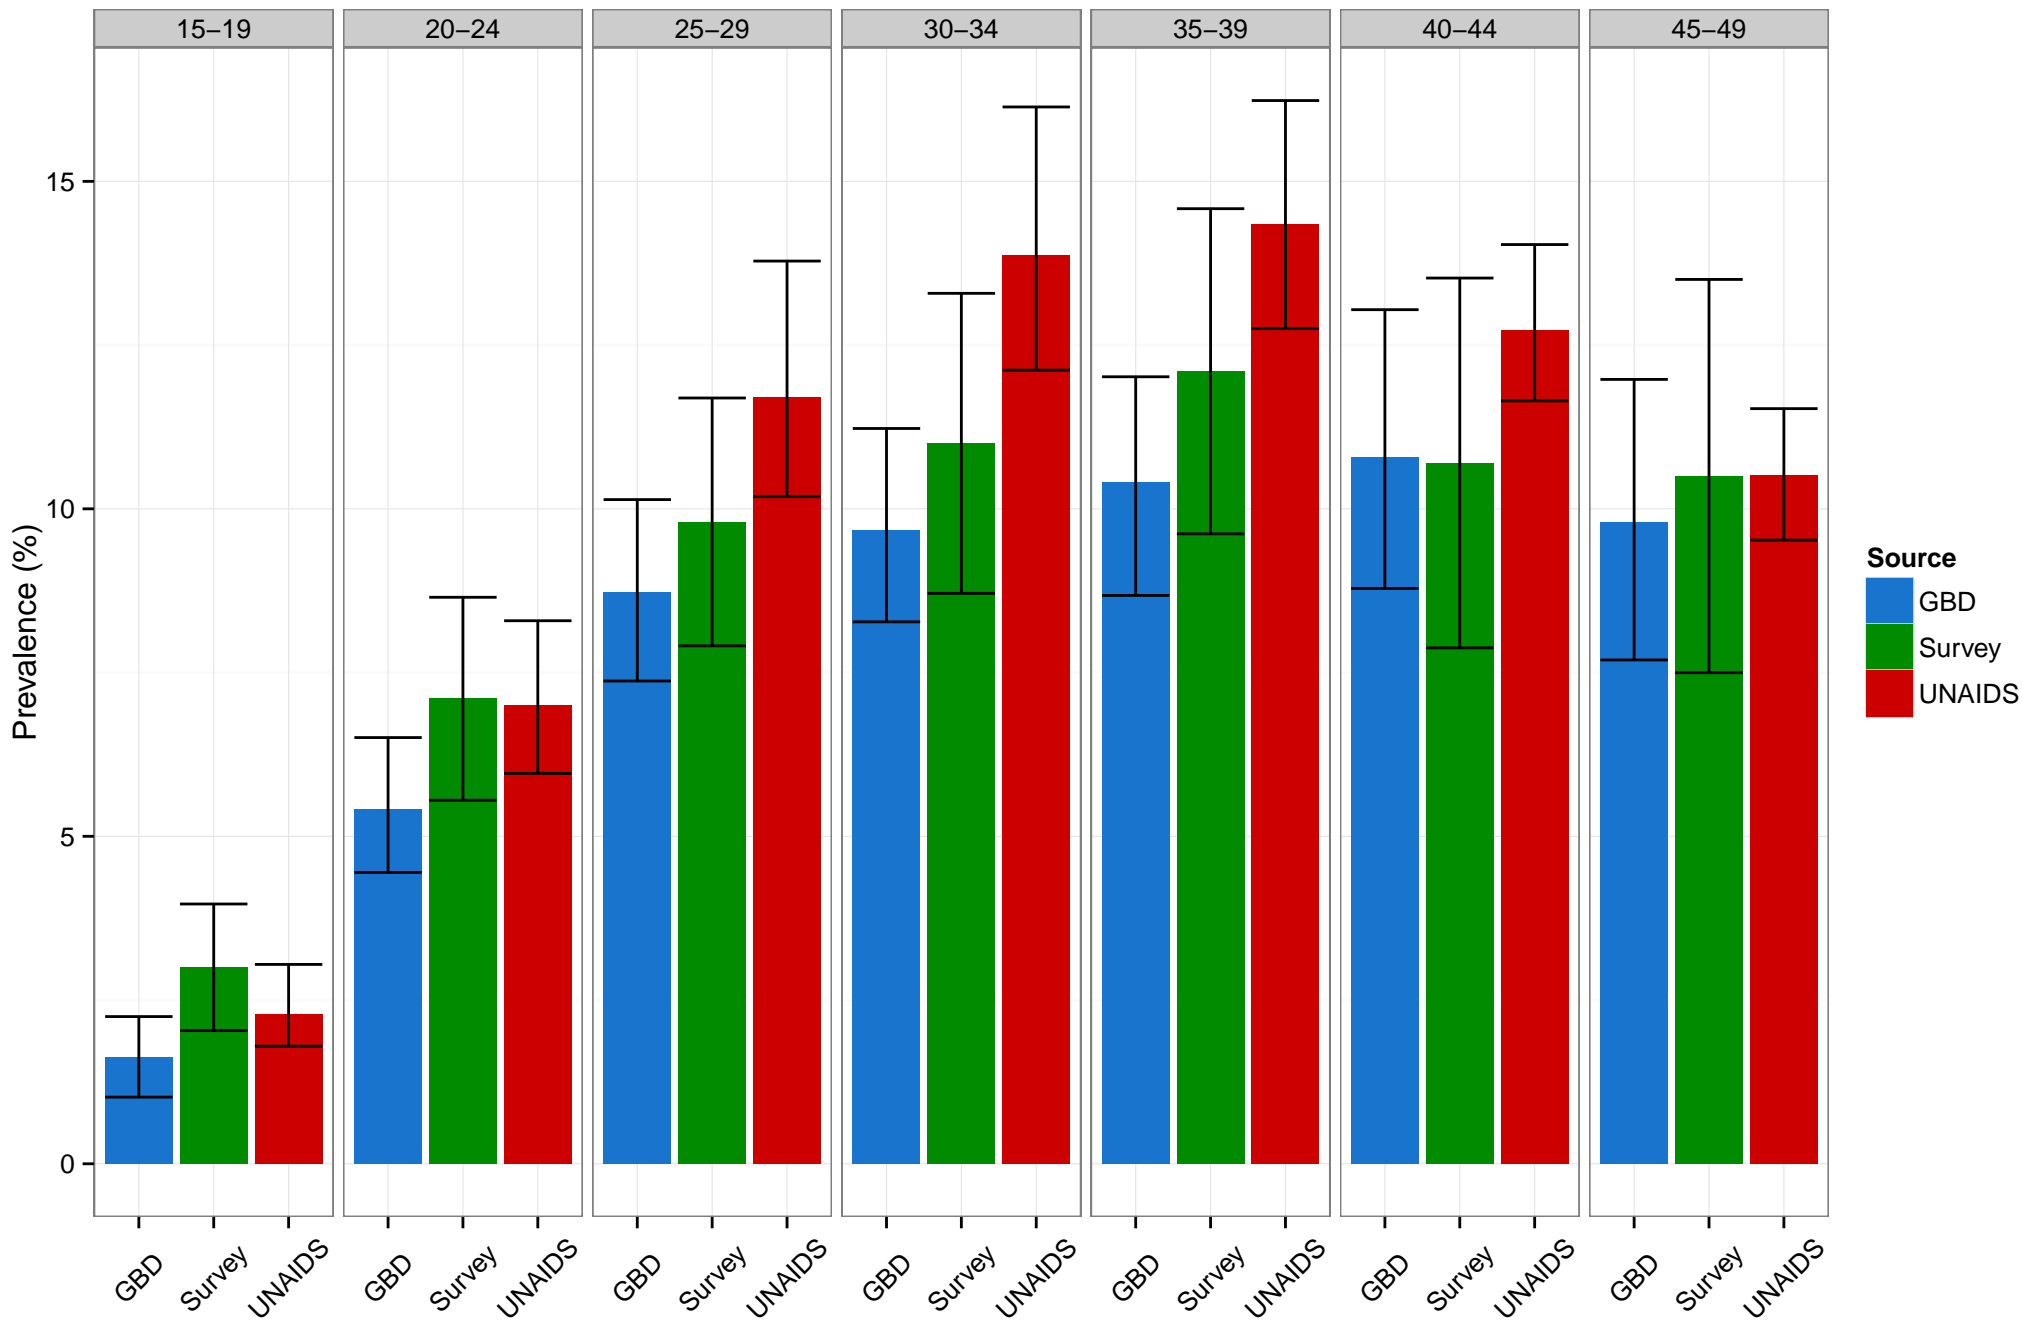

# HIV prevalence comparison to survey estimates by age-group with 95% confidence intervals

ZAF 2012 Males

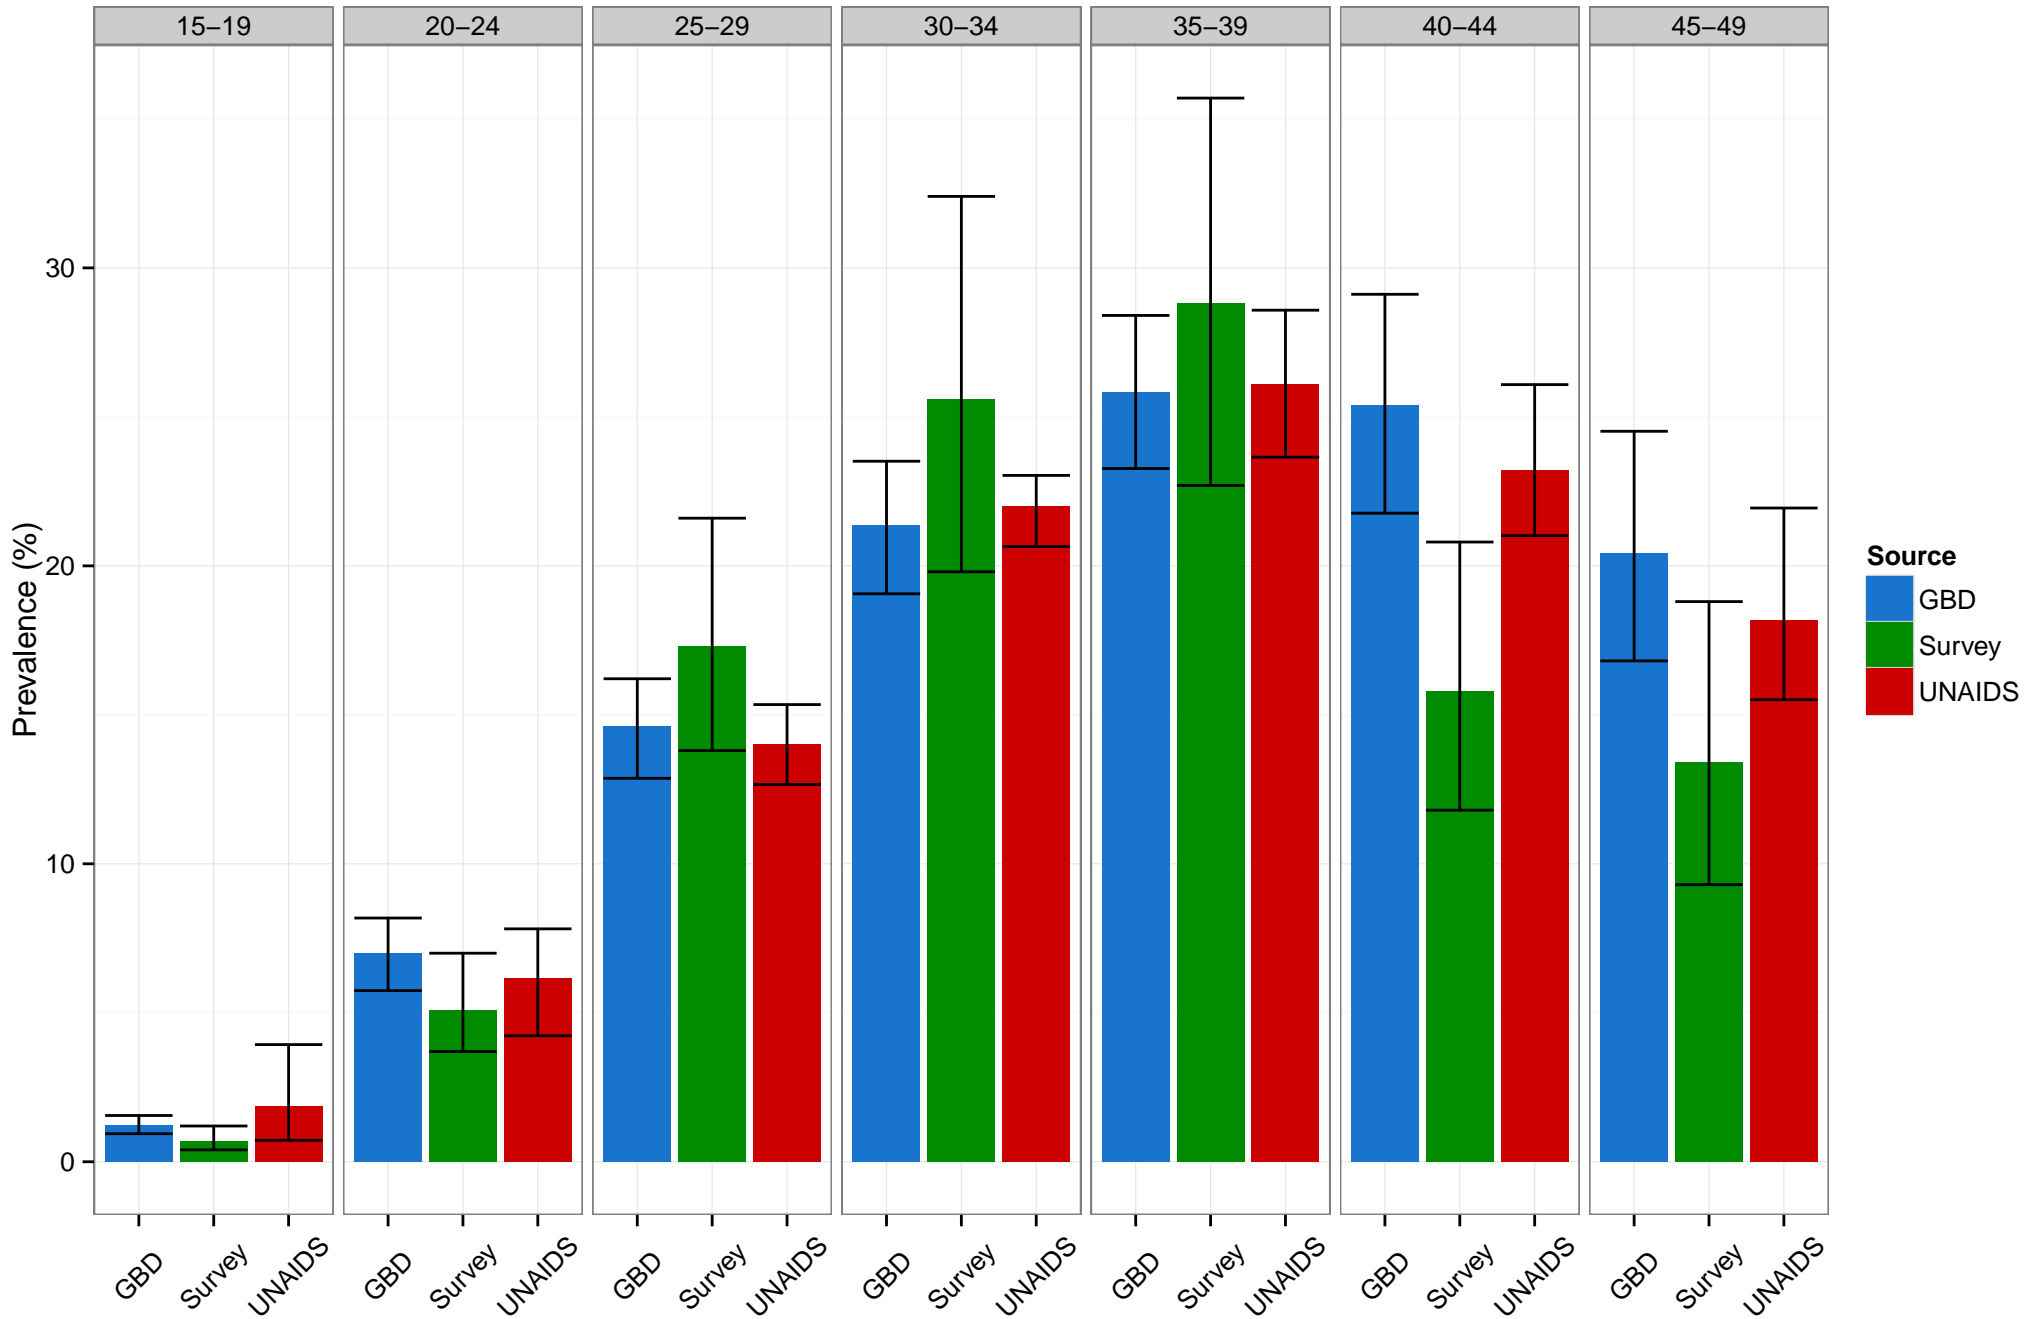

# HIV prevalence comparison to survey estimates by age-group with 95% confidence intervals

ZAF 2012 Females

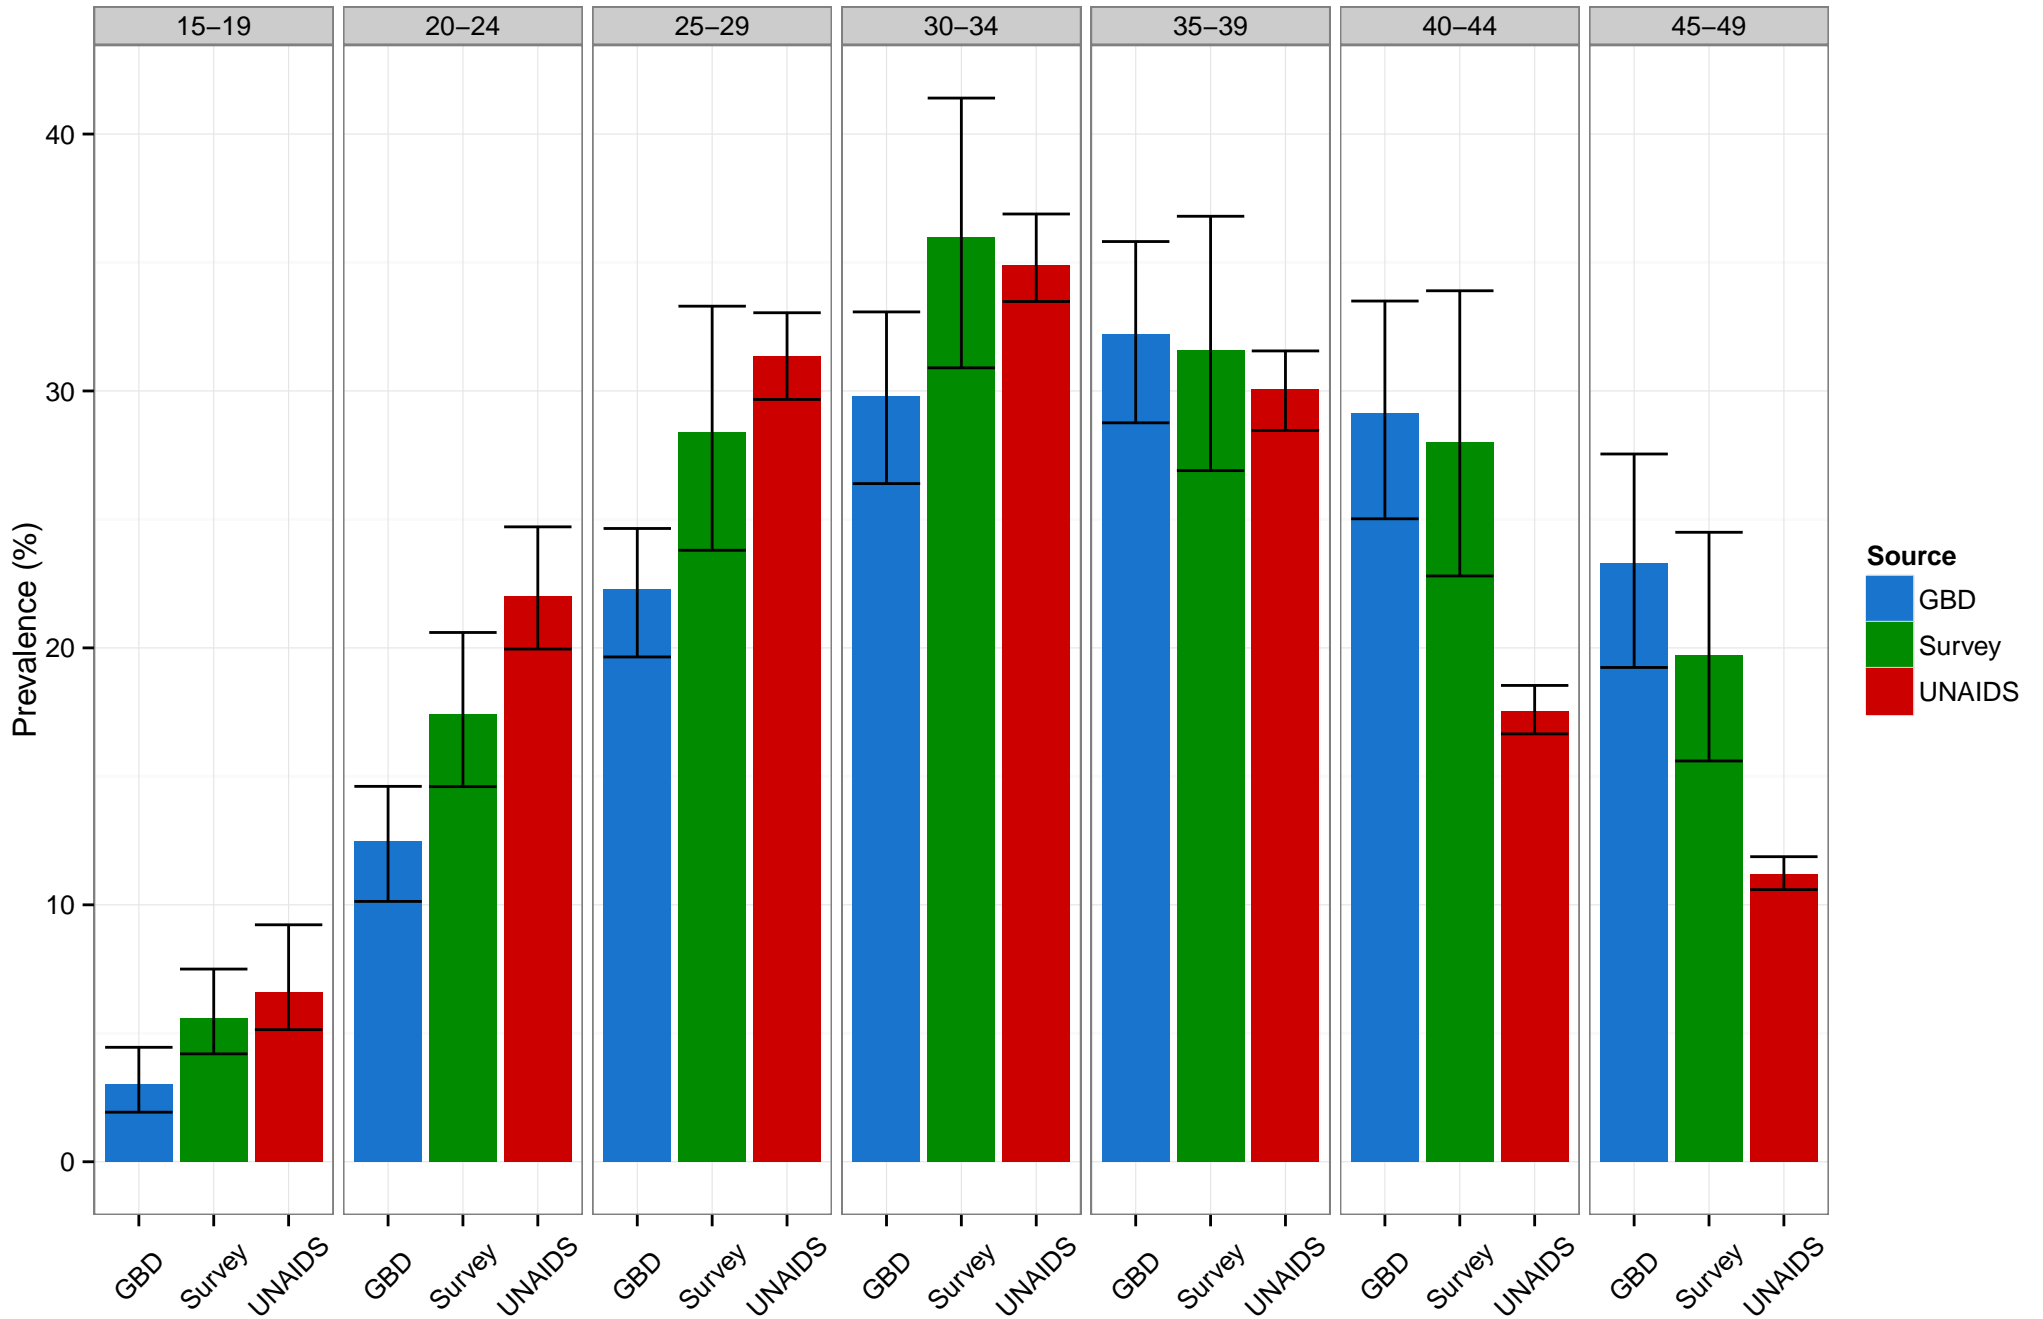

# HIV prevalence comparison to survey estimates by age-group with 95% confidence intervals

ZMB 2001–2002 Males

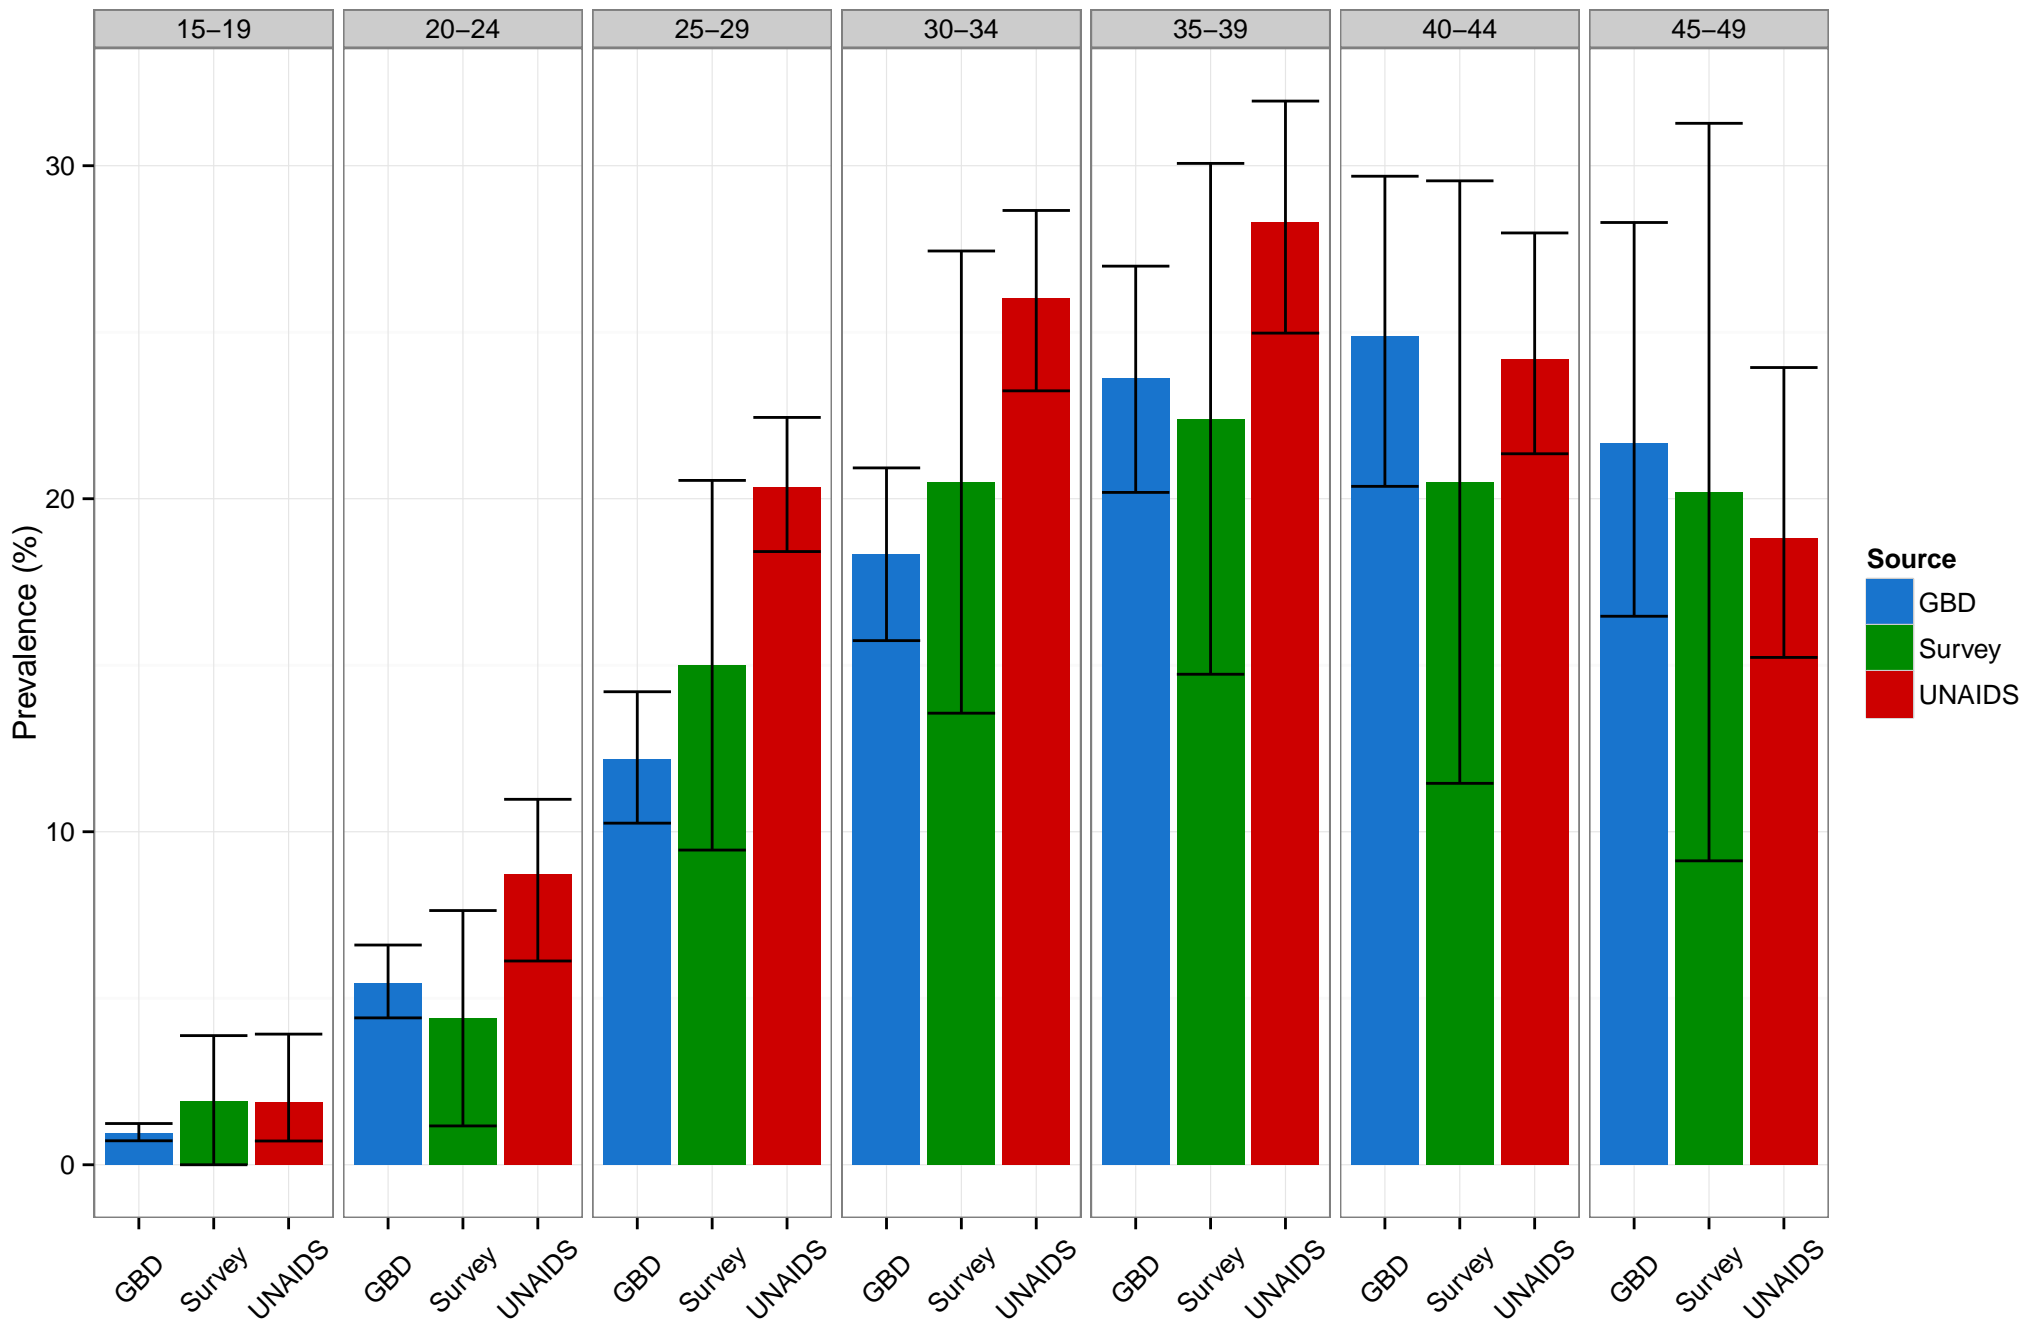

# HIV prevalence comparison to survey estimates by age-group with 95% confidence intervals

ZMB 2001–2002 Females

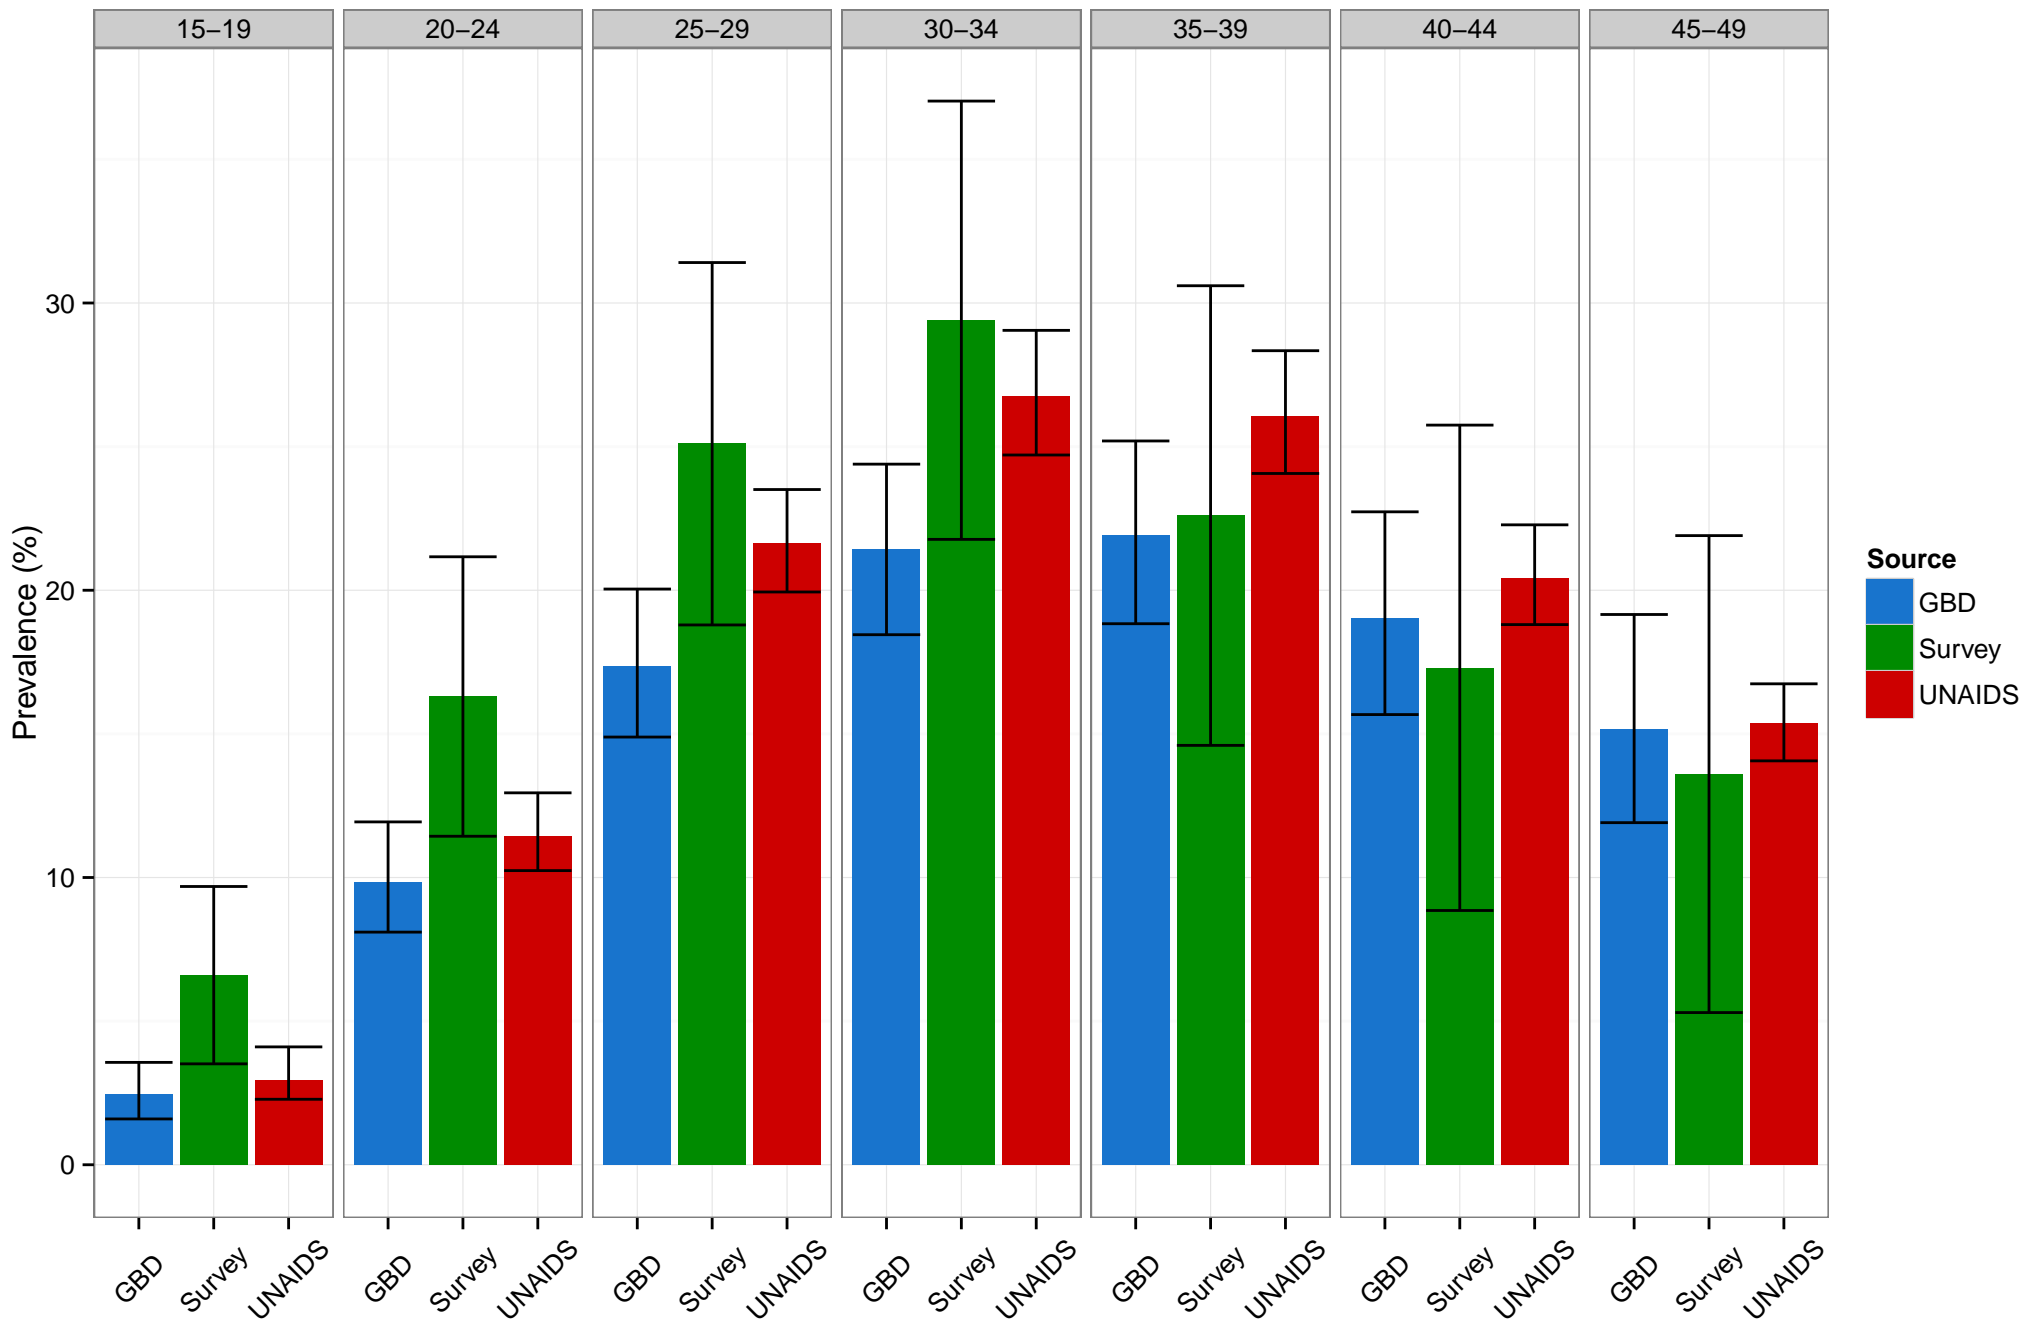

# HIV prevalence comparison to survey estimates by age-group with 95% confidence intervals

ZMB 2007 Males

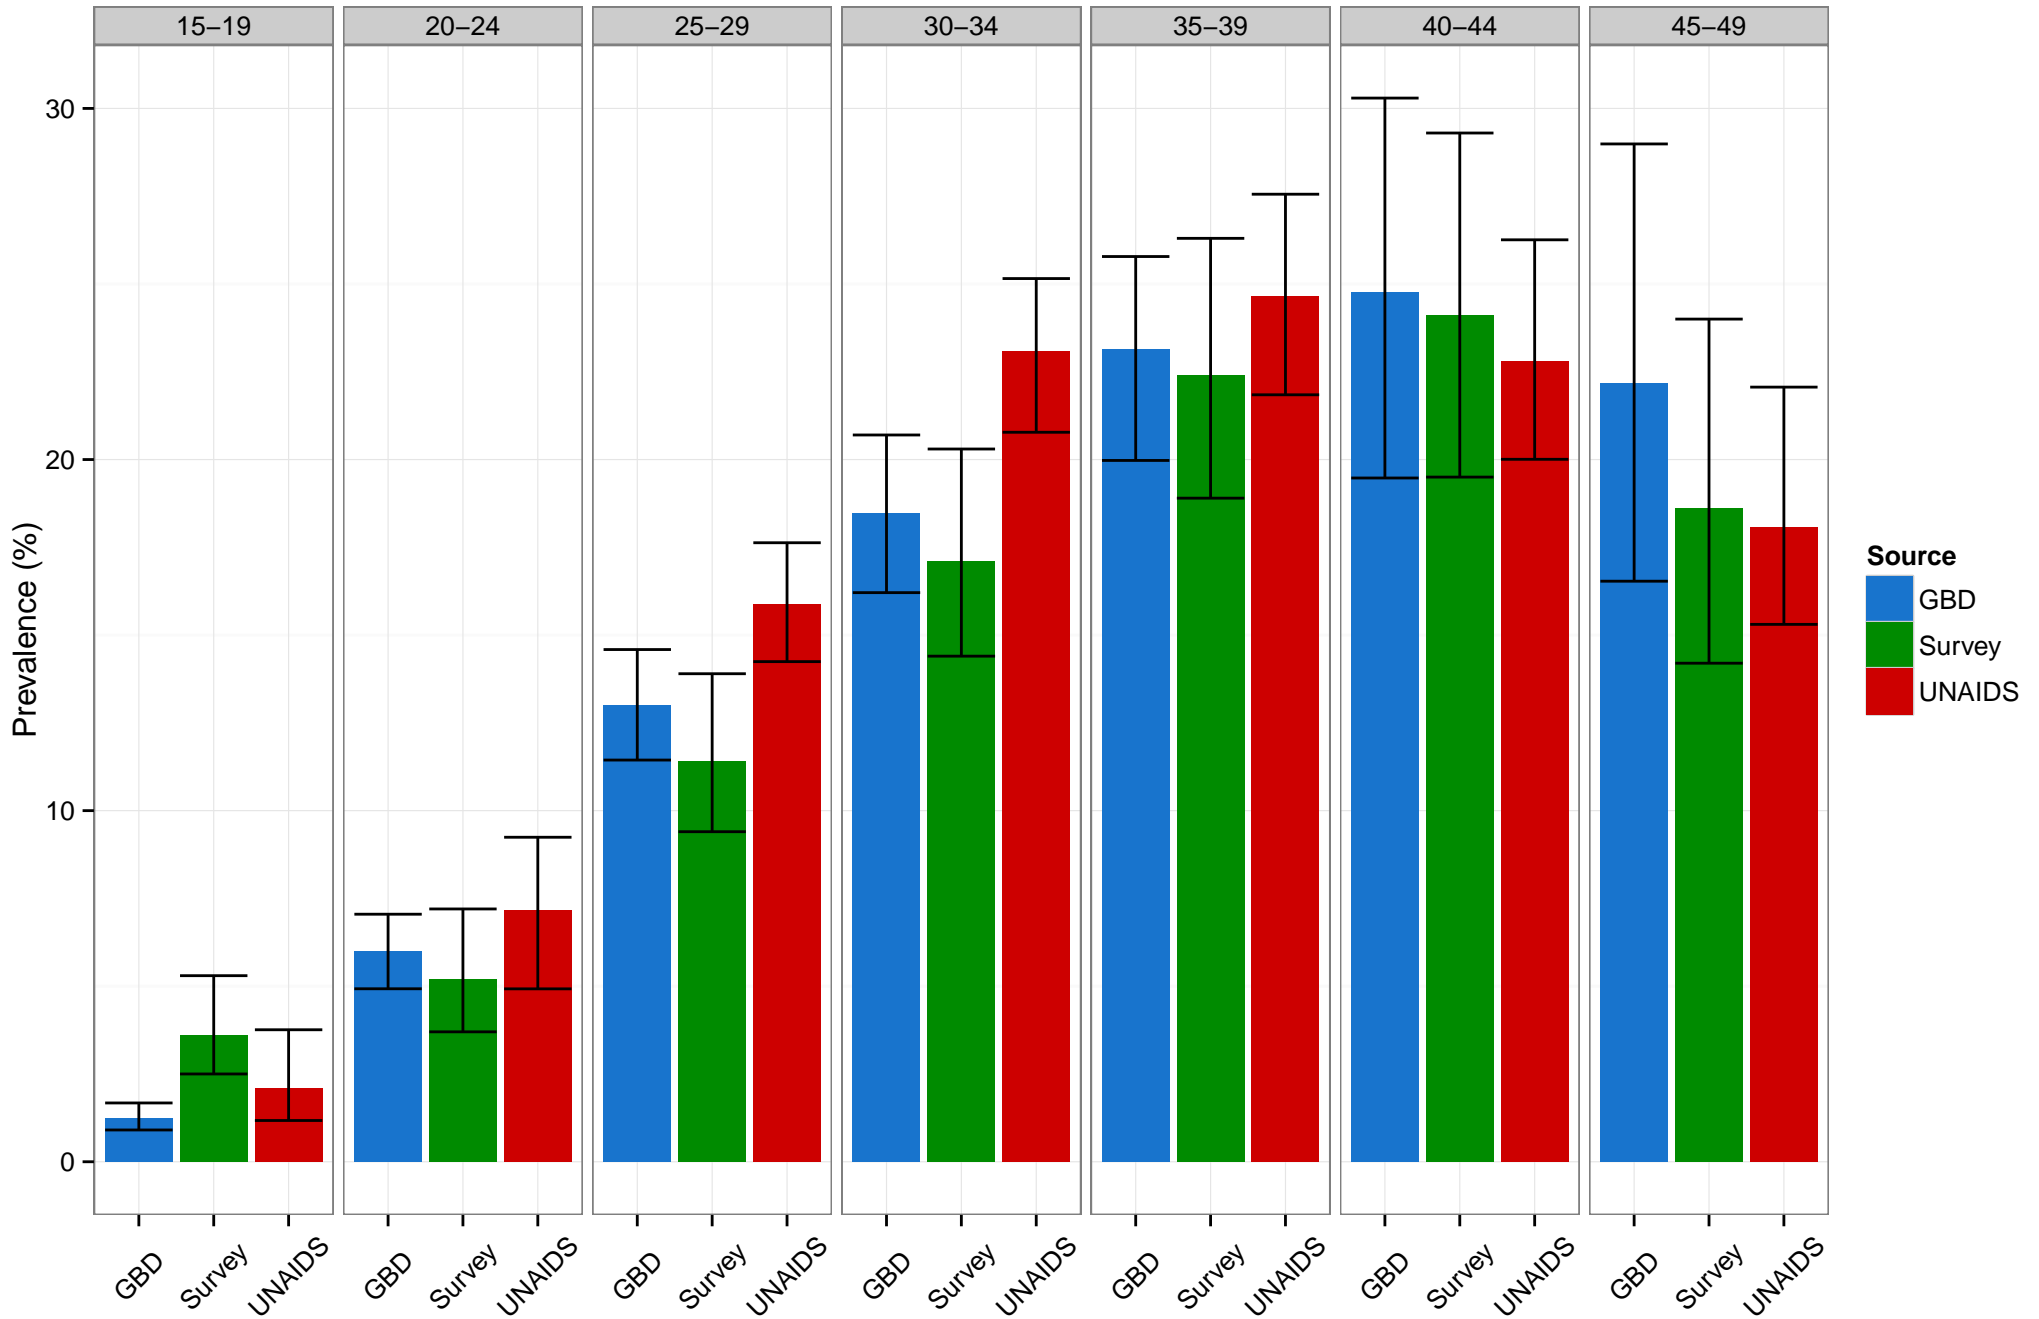

# HIV prevalence comparison to survey estimates by age-group with 95% confidence intervals

ZMB 2007 Females

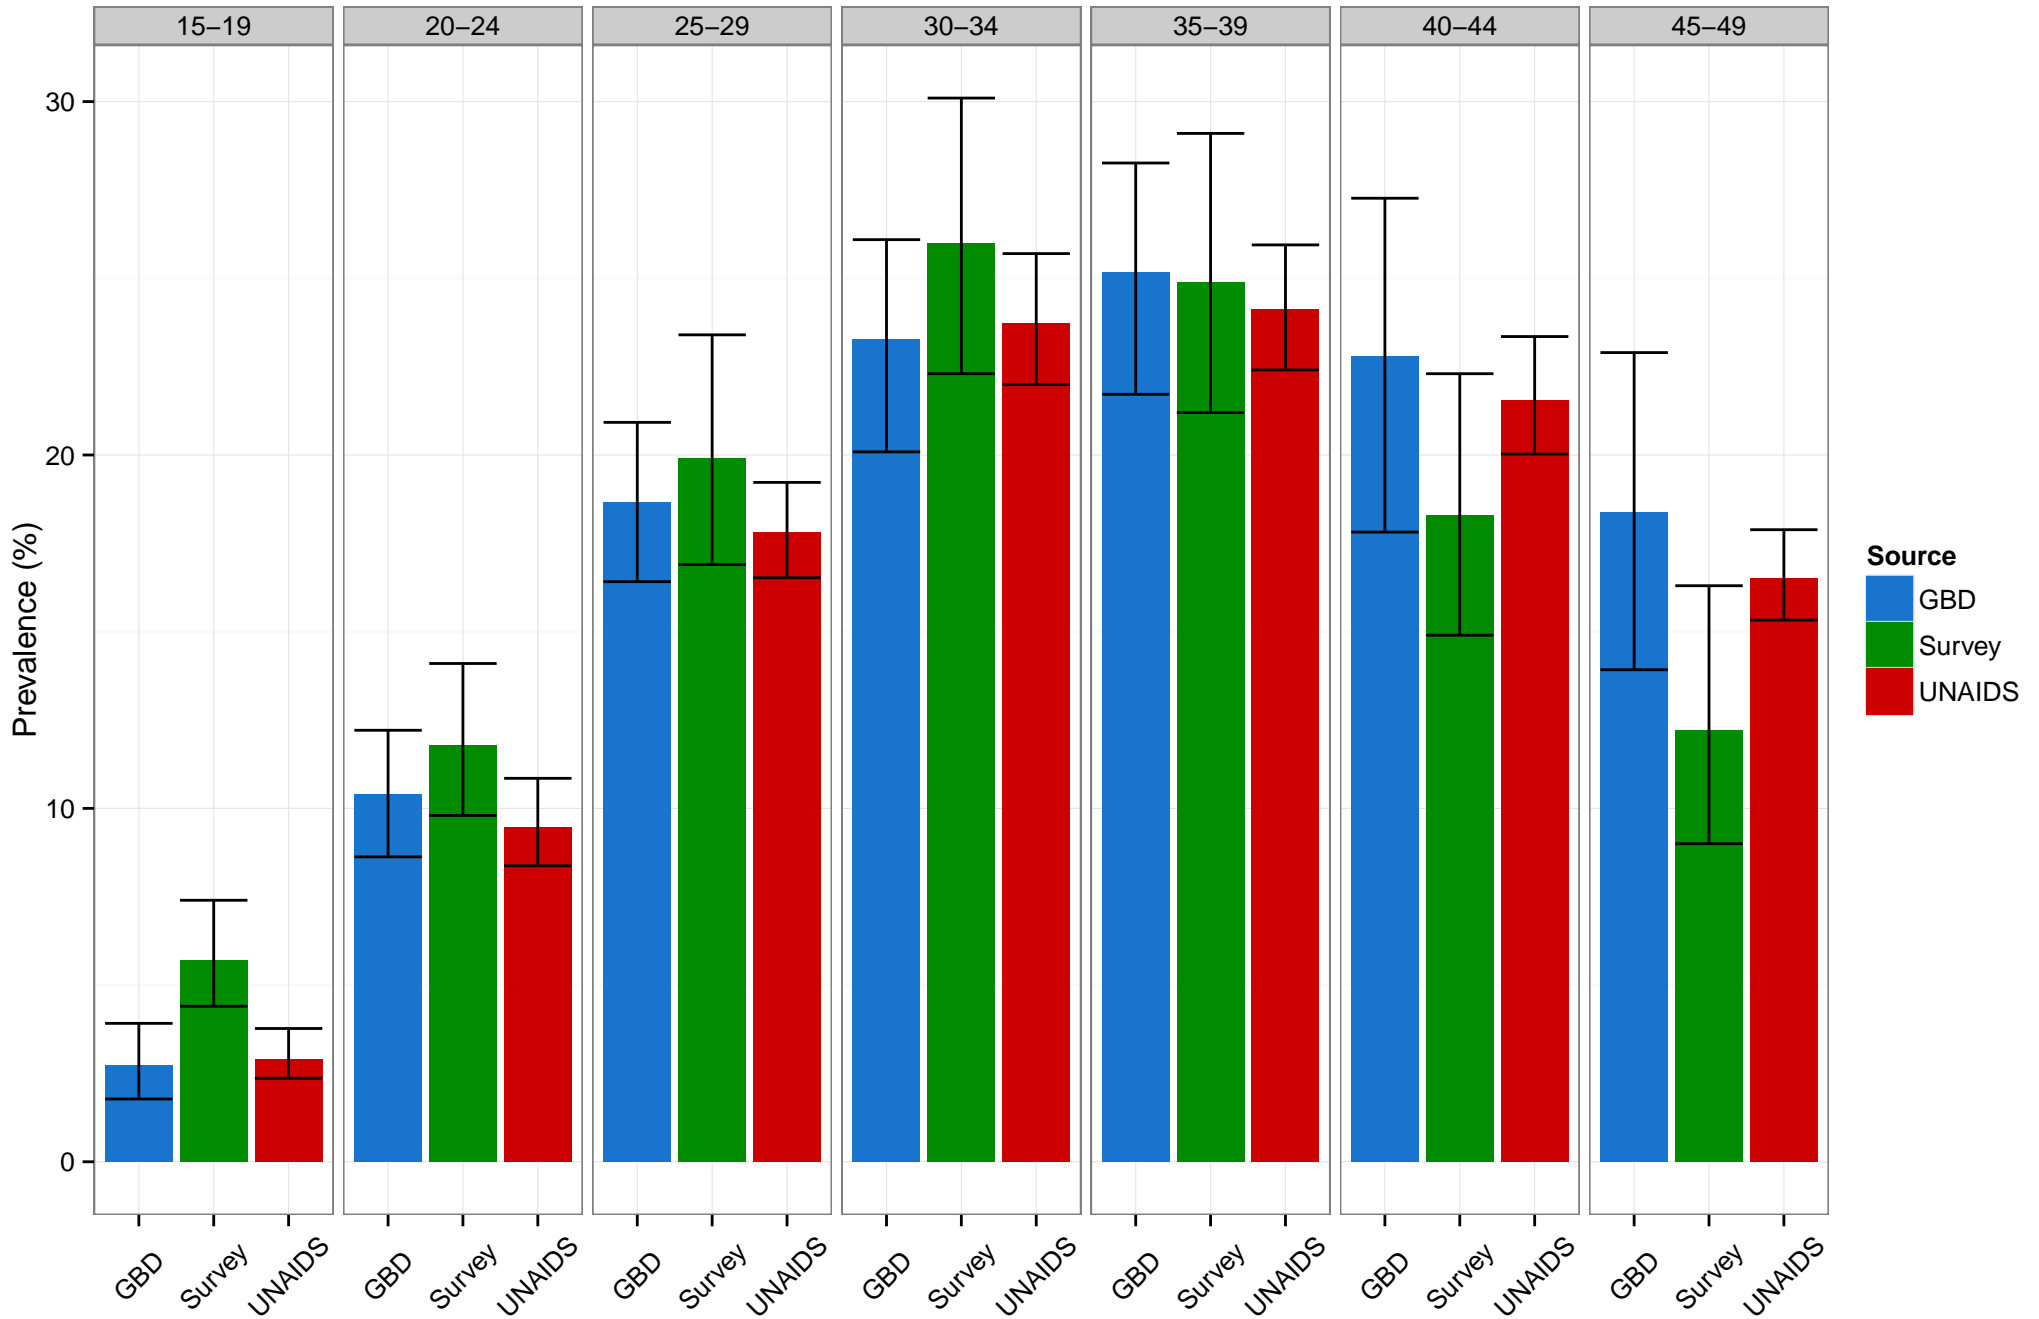



# HIV prevalence comparison to survey estimates by age-group with 95% confidence intervals

ZWE 2005 Males

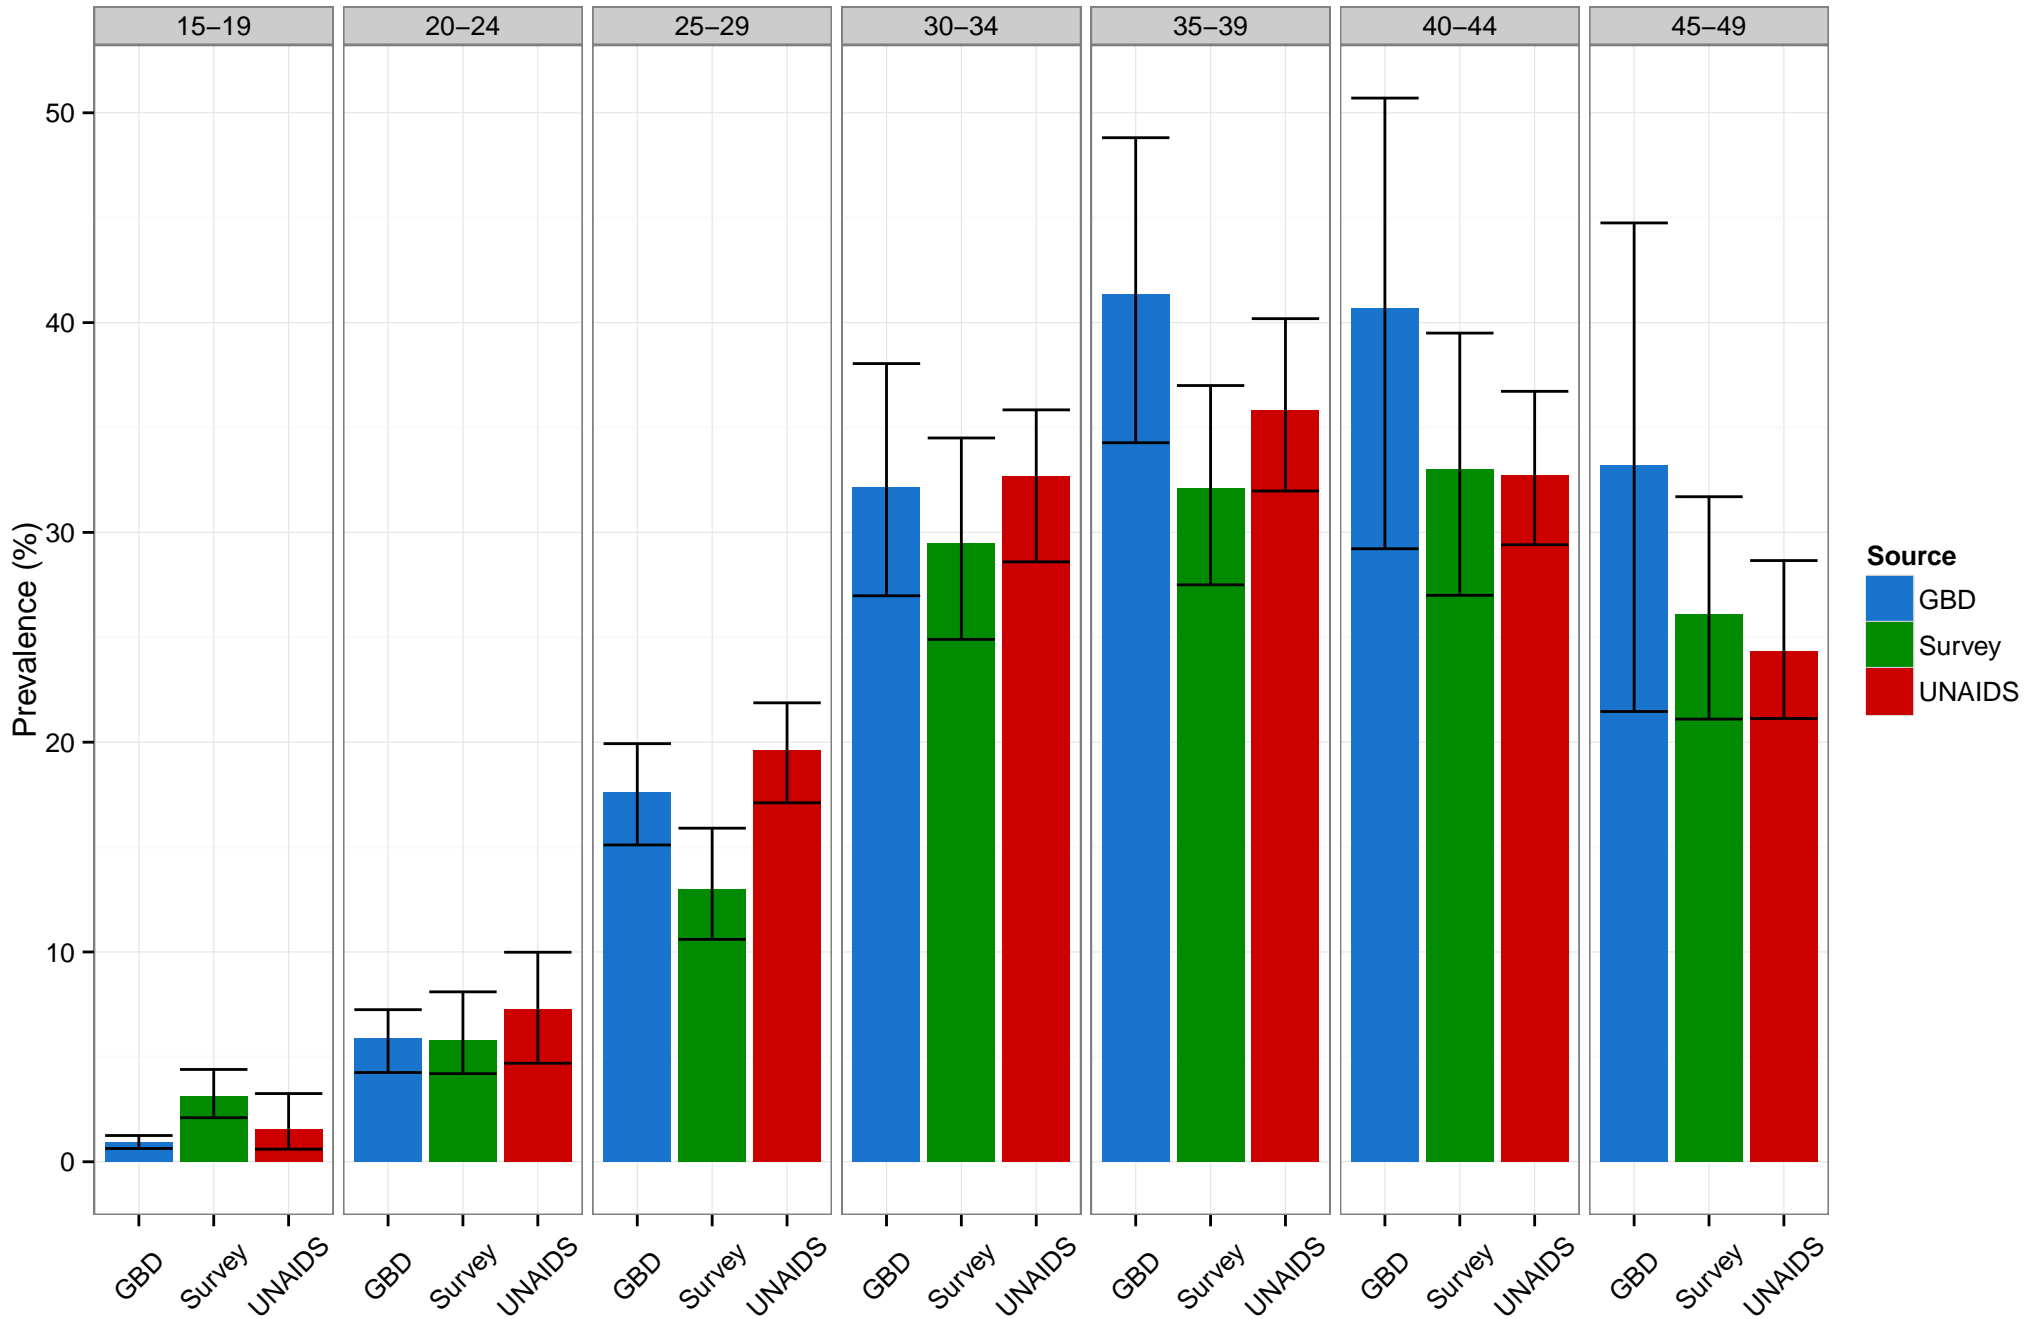

# HIV prevalence comparison to survey estimates by age-group with 95% confidence intervals

ZWE 2005 Females

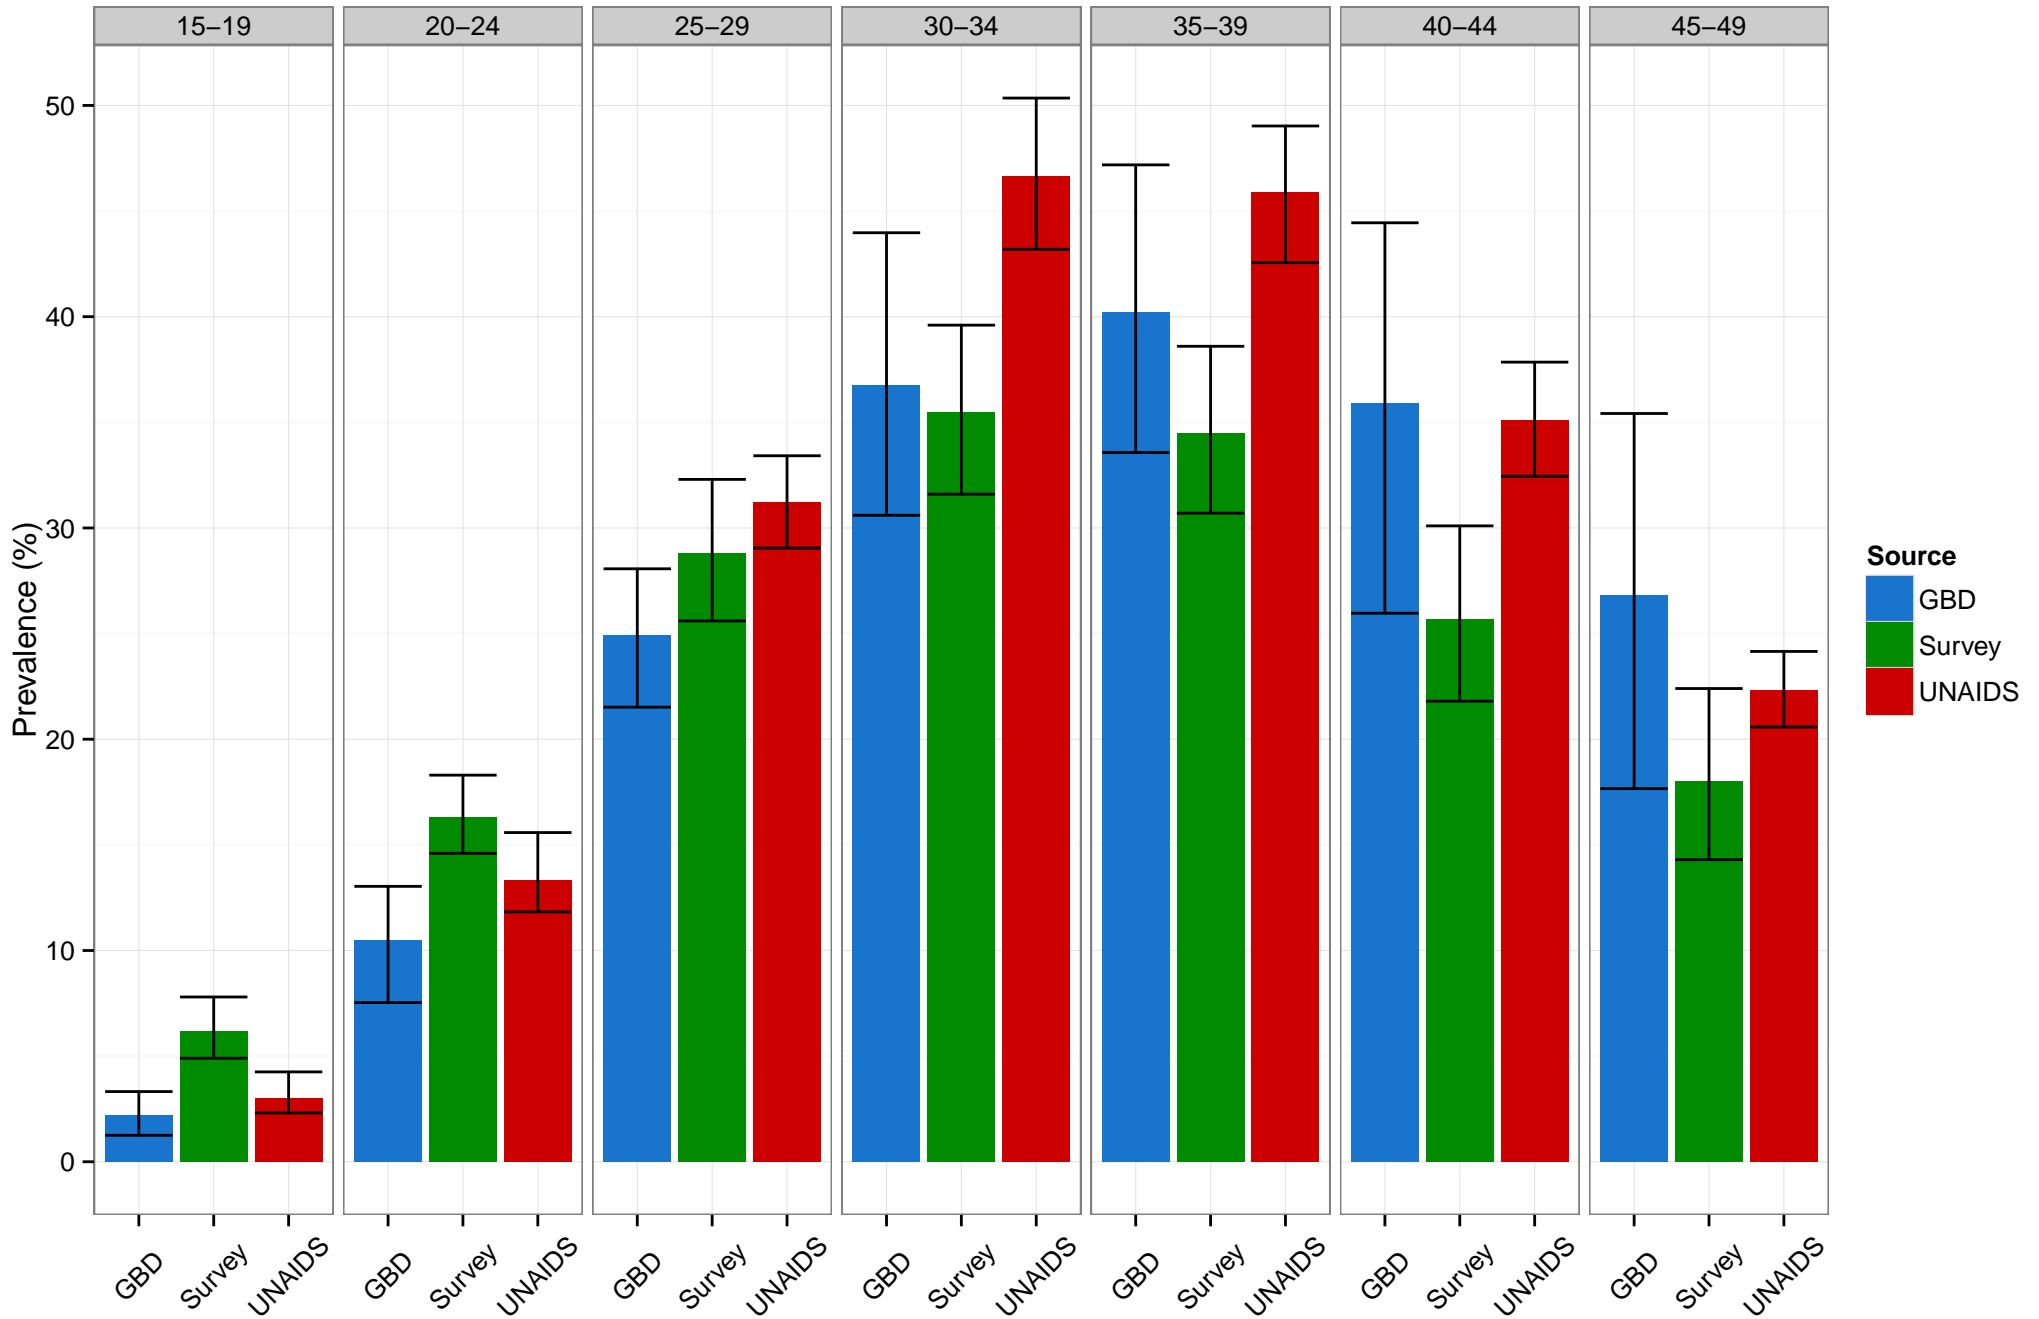

# HIV prevalence comparison to survey estimates by age-group with 95% confidence intervals

ZWE 2011 Males

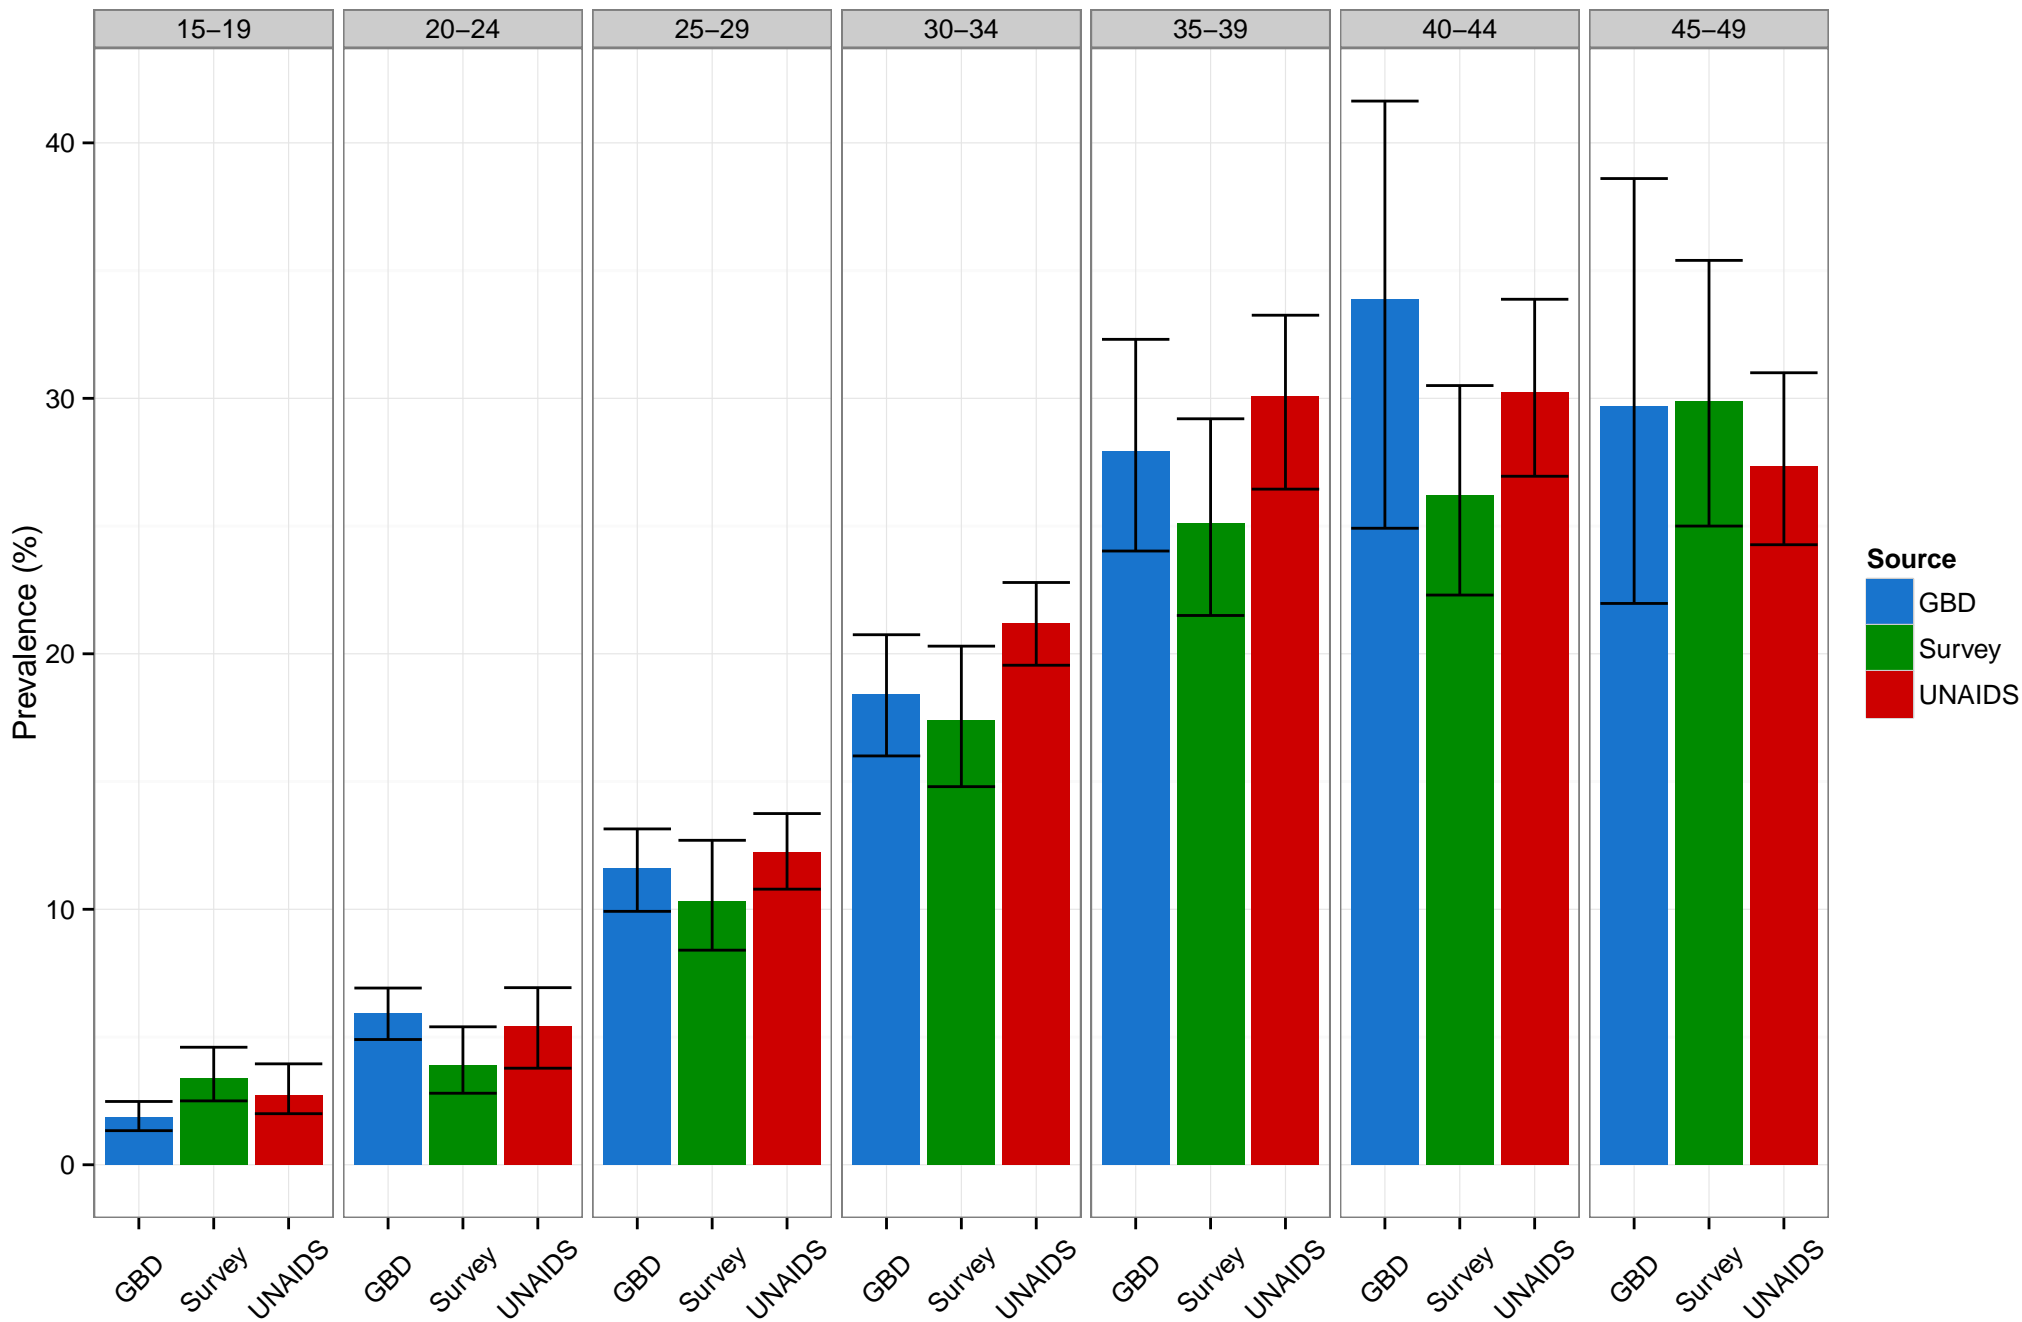

# HIV prevalence comparison to survey estimates by age-group with 95% confidence intervals

ZWE 2011 Females

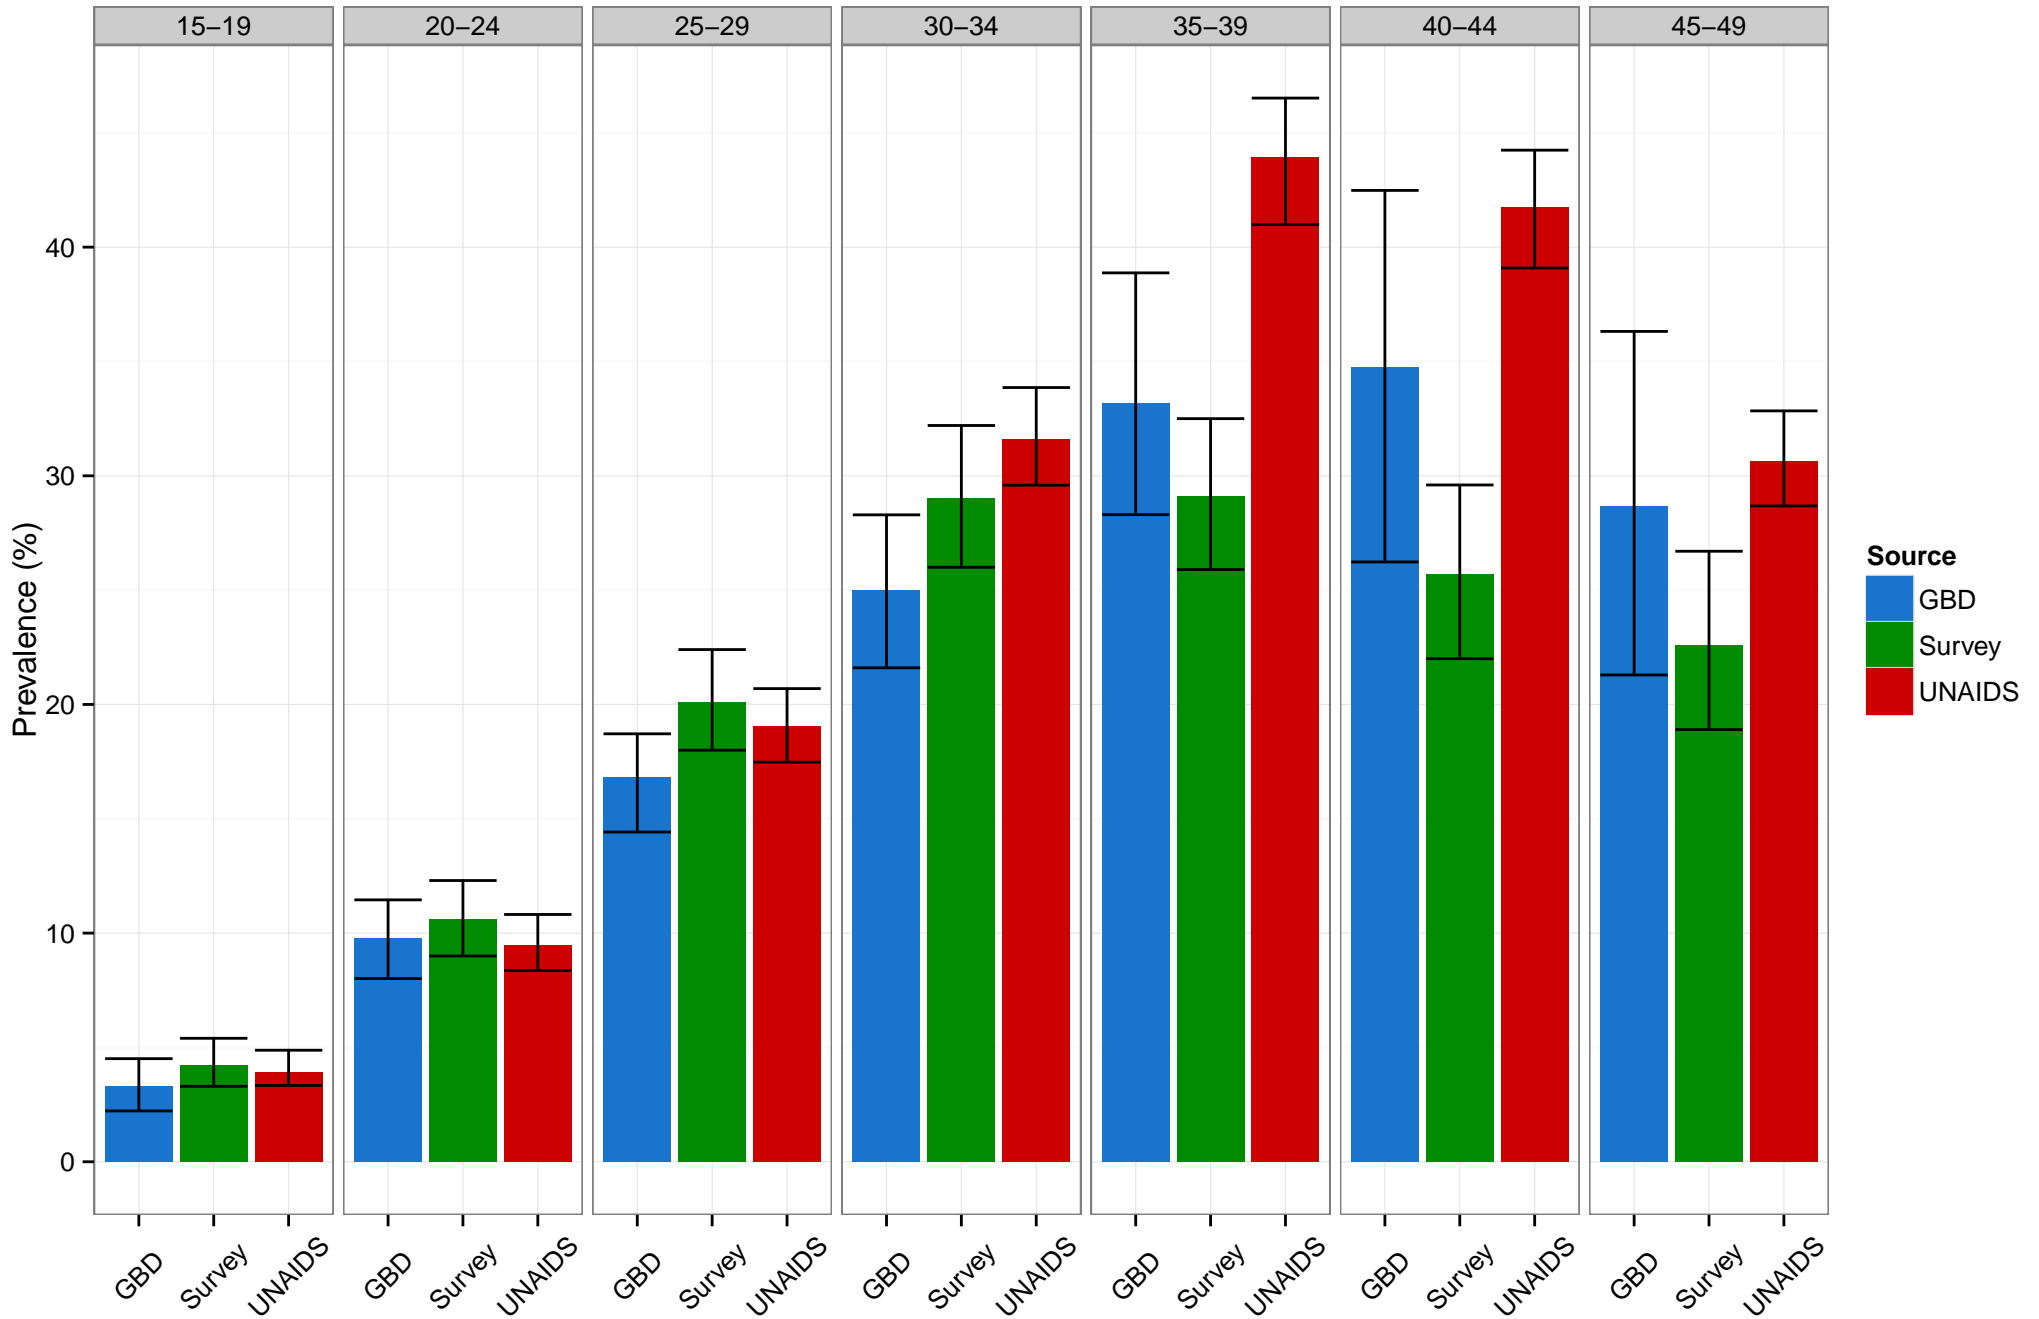

## Appendix Table 1. Data sources used in the mortality without ART analysis

Collaborative Group on AIDS Incubation and HIV Survival \* including the CASCADE EU Concerted Action. Time from HIV-1 seroconversion to AIDS and death before widespread use of highly-active antiretroviral therapy: a collaborative re-analysis. Collaborative Group on AIDS Incubation and HIV Survival including the CASCADE EU Concerted Action. Concerted Action on SeroConversion to AIDS and Death in Europe. *Lancet* 2000; 355: 1131–7.

Deschamps MM, Fitzgerald DW, Pape JW, Johnson WD Jr. HIV infection in Haiti: natural history and disease progression. *AIDS* 2000; 14: 2515–21.

Glynn JR, Sonnenberg P, Nelson G, Bester A, Shearer S, Murray J. Survival from HIV-1 seroconversion in Southern Africa: a retrospective cohort study in nearly 2000 gold-miners over 10 years of follow-up. *AIDS* 2007; 21: 625–32.

Isingo R, Zaba B, Marston M, et al. Survival after HIV infection in the pre-antiretroviral therapy era in a rural Tanzanian cohort. *AIDS* 2007; 21 Suppl 6: S5–S13.

Kilmarx PH, Limpakarnjanarat K, Kaewkungwal J, et al. Disease progression and survival with human immunodeficiency virus type 1 subtype E infection among female sex workers in Thailand. *J Infect Dis* 2000; 181: 1598–606.

Lutalo T, Gray RH, Wawer M, et al. Survival of HIV-infected treatment-naive individuals with documented dates of seroconversion in Rakai, Uganda. *AIDS* 2007; 21 Suppl 6: S15–19.

Manaloto CR, Perrault JG, Caringal LT, et al. Natural history of HIV infection in Filipino female commercial sex workers. *J Acquir Immune Defic Syndr* 1994; 7: 1157–68.

Minga A, Danel C, Abo Y, et al. Progression to WHO criteria for antiretroviral therapy in a 7-year cohort of adult HIV-1 seroconverters in Abidjan, Côte d'Ivoire. *Bull World Health Organ* 2007; 85: 116–23.

Nelson KE, Costello C, Suriyanon V, Sennun S, Duerr A. Survival of blood donors and their spouses with HIV-1 subtype E (CRF01\_A\_E) infection in northern Thailand, 1992-2007. *AIDS* 2007; 21 Suppl 6: S47–54.

Peters PJ, Karita E, Kayitenkore K, et al. HIV-infected Rwandan women have a high frequency of long-term survival. *AIDS* 2007; 21 Suppl 6: S31–37.

Porter K, Zaba B. The empirical evidence for the impact of HIV on adult mortality in the developing world: data from serological studies. *AIDS* 2004; 18 Suppl 2: S9–S17.

Rangsin R, Piyaraj P, Sirisanthana T, Sirisopana N, Short O, Nelson KE. The natural history of HIV-1 subtype E infection in young men in Thailand with up to 14 years of follow-up. *AIDS* 2007; 21 Suppl 6: S39–46.

Van der Paal L, Shafer LA, Todd J, Mayanja BN, Whitworth JAG, Grosskurth H. HIV-1 disease progression and mortality before the introduction of highly active antiretroviral therapy in rural Uganda. *AIDS* 2007; 21 Suppl 6: S21–29.

| Appendix Table 2. Data sources used in the mortality on ART analysis                                                                                                                                                                                                                 | Mortality and LTFU rates | Sex hazard ratios | Age hazard ratios |
|--------------------------------------------------------------------------------------------------------------------------------------------------------------------------------------------------------------------------------------------------------------------------------------|--------------------------|-------------------|-------------------|
| Abaasa AM, Todd J, Ekoru K, et al. Good adherence to HAART and improved survival in a community HIV/AIDS treatment and care programme: the experience of The AIDS Support Organization (TASO), Kampala, Uganda. <i>BMC Health Serv Res</i> 2008; 8: 241.                             |                          | x                 | x                 |
| Alvarez-Uria G, Naik PK, Pakam R, Midde M. Factors associated with attrition, mortality, and loss to follow up after antiretroviral therapy initiation: data from an HIV cohort study in India. <i>Glob Health Action</i> 2013; 6: 21682.                                            | x                        | x                 | x                 |
| Amuron B, Levin J, Birunghi J, et al. Mortality in an antiretroviral therapy programme in Jinja, south-east Uganda: a prospective cohort study. <i>AIDS Res Ther</i> 2011; 8: 39.                                                                                                    |                          | x                 |                   |
| Antiretroviral Therapy Cohort Collaboration. Causes of death in HIV-1-infected patients treated with antiretroviral therapy, 1996-2006: collaborative analysis of 13 HIV cohort studies. <i>Clin Infect Dis</i> 2010; 50: 1387-96.                                                   |                          | x                 |                   |
| Assefa Y, Kiflie A, Tesfaye D, et al. Outcomes of antiretroviral treatment program in Ethiopia: retention of patients in care is a major challenge and varies across health facilities. <i>BMC Health Serv Res</i> 2011; 11: 81.                                                     | x                        |                   |                   |
| Badie BM, Nabaei G, Rasoolinejad M, Mirzazadeh A, McFarland W. Early loss to follow-up and mortality of HIV-infected patients diagnosed after the era of antiretroviral treatment scale up: a call for re-invigorating the response in Iran. <i>Int J STD AIDS</i> 2013; 24: 926-30. |                          | x                 |                   |
| Bakanda C, Birungi J, Mwesigwa R, et al. Survival of HIV-infected adolescents on antiretroviral therapy in Uganda: findings from a nationally representative cohort in Uganda. <i>PLoS ONE</i> 2011; 6: e19261.                                                                      | x                        |                   |                   |
| Biadgilign S, Reda AA, Digaffe T. Predictors of mortality among HIV infected patients taking antiretroviral treatment in Ethiopia: a retrospective cohort study. <i>AIDS Res Ther</i> 2012; 9: 15.                                                                                   |                          | x                 |                   |
| Bisson GP, Gaolathe T, Gross R, et al. Overestimates of survival after HAART: implications for global scale-up efforts. <i>PLoS ONE</i> 2008; 3: e1725.                                                                                                                              |                          | x                 |                   |
| Boulle A, Van Cutsem G, Hilderbrand K, et al. Seven-year experience of a primary care antiretroviral treatment programme in Khayelitsha, South Africa. <i>AIDS</i> 2010; 24: 563-72.                                                                                                 | x                        | x                 | x                 |
| Boyles TH, Wilkinson LS, Leisegang R, Maartens G. Factors influencing retention in care after starting antiretroviral therapy in a rural South African programme. <i>PLoS ONE</i> 2011; 6: e19201.                                                                                   | x                        |                   |                   |
| Brennan AT, Maskew M, Sanne I, Fox MP. The interplay between CD4 cell count, viral load suppression and duration of antiretroviral therapy on mortality in a resource-limited setting. <i>Trop Med Int Health</i> 2013; 18: 619-31.                                                  |                          | x                 | x                 |
| Brinkhof MWG, Boulle A, Weigel R, et al. Mortality of HIV-infected patients starting antiretroviral therapy in sub-Saharan Africa: comparison with HIV-unrelated mortality. <i>PLoS Med</i> 2009; 6: e1000066.                                                                       |                          | x                 | x                 |
| Brinkhof MWG, Dabis F, Myer L, et al. Early loss of HIV-infected patients on potent antiretroviral therapy programmes in lower-income countries. <i>Bull World Health Organ</i> 2008; 86: 559-67.                                                                                    | x                        | x                 | x                 |
| Chang LW, Alamo S, Guma S, et al. Two-year virologic outcomes of an alternative AIDS care model: evaluation of a peer health worker and nurse-staffed community-based program in Uganda. <i>J Acquir Immune Defic Syndr</i> 2009; 50: 276-82.                                        | x                        |                   |                   |
| Chasombat S, McConnell MS, Siangphoe U, et al. National expansion of antiretroviral treatment in Thailand, 2000-2007: program scale-up and patient outcomes. <i>J Acquir Immune Defic Syndr</i> 2009; 50: 506-12.                                                                    |                          | x                 | x                 |
| Chen J, Yu B, Wang Y, et al. Expansion of HIV care and treatment in Yunnan Province, China: Treatment outcomes with scale up of combination antiretroviral therapy. <i>AIDS Care</i> 2014; 26: 633-41.                                                                               |                          | x                 | x                 |
| Chen SC-C, Yu JK-L, Harries AD, et al. Increased mortality of male adults with AIDS related to poor compliance to antiretroviral therapy in Malawi. <i>Trop Med Int Health</i> 2008; 13: 513-9.                                                                                      |                          | x                 | x                 |
| Chi BH, Mwango A, Giganti M, et al. Early clinical and programmatic outcomes with tenofovir-based antiretroviral therapy in Zambia. <i>J Acquir Immune Defic Syndr</i> 2010; 54: 63-70.                                                                                              |                          | x                 | x                 |
| Chi BH, Mwango A, Giganti MJ, et al. Comparative outcomes of tenofovir-based and zidovudine-based antiretroviral therapy regimens in Lusaka, Zambia. <i>J Acquir Immune Defic Syndr</i> 2011; 58: 475-81.                                                                            | x                        |                   |                   |
| Corey DM, Kim HW, Salazar R, et al. Brief report: effectiveness of combination antiretroviral therapy on survival and opportunistic infections in a developing world setting: an observational cohort study. <i>J Acquir Immune Defic Syndr</i> 2007; 44: 451-5.                     | x                        |                   |                   |
| Cornell M, Grimsrud A, Fairall L, et al. Temporal changes in programme outcomes among adult patients initiating antiretroviral therapy across South Africa, 2002-2007. <i>AIDS</i> 2010; 24: 2263-70.                                                                                | x                        |                   |                   |
| Cornell M, Myer L, Kaplan R, Bekker L-G, Wood R. The impact of gender and income on survival and retention in a South African antiretroviral therapy programme. <i>Trop Med Int Health</i> 2009; 14: 722-31.                                                                         |                          | x                 |                   |
| Cornell M, Schomaker M, Garone DB, et al. Gender differences in survival among adult patients starting antiretroviral therapy in South Africa: a multicentre cohort study. <i>PLoS Med</i> 2012; 9: e1001304.                                                                        |                          | x                 |                   |
| DeSilva MB, Merry SP, Fischer PR, Rohrer JE, Isichei CO, Cha SS. Youth, unemployment, and male gender predict mortality in AIDS patients started on HAART in Nigeria. <i>AIDS Care</i> 2009; 21: 70-7.                                                                               |                          | x                 | x                 |
| Egger M, May M, Chêne G, et al. Prognosis of HIV-1-infected patients starting highly active antiretroviral therapy: a collaborative analysis of prospective studies. <i>Lancet</i> 2002; 360: 119-29.                                                                                | x                        |                   |                   |
| Fatti G, Grimwood A, Bock P. Better antiretroviral therapy outcomes at primary healthcare facilities: an evaluation of three tiers of ART services in four South African provinces. <i>PLoS ONE</i> 2010; 5: e12888.                                                                 | x                        | x                 |                   |
| Ford N, Kranzer K, Hilderbrand K, et al. Early initiation of antiretroviral therapy and associated reduction in mortality, morbidity and defaulting in a nurse-managed, community cohort in Lesotho. <i>AIDS</i> 2010; 24: 2645-50.                                                  | x                        | x                 | x                 |
| Fregonese F, Collins IJ, Jourdain G, et al. Predictors of 5-year mortality in HIV-infected adults starting highly active antiretroviral therapy in Thailand. <i>J Acquir Immune Defic Syndr</i> 2012; 60: 91-8.                                                                      |                          | x                 |                   |
| Garcia de Olalla P, Knobel H, Carmona A, Guelar A, López-Colomé JL, Caylá JA. Impact of adherence and highly active antiretroviral therapy on survival in HIV-infected patients. <i>J Acquir Immune Defic Syndr</i> 2002; 30: 105-10.                                                |                          | x                 | x                 |
| Geng EH, Emenyonu N, Bwana MB, Glidden DV, Martin JN. Sampling-based approach to determining outcomes of patients lost to follow-up in antiretroviral therapy scale-up programs in Africa. <i>JAMA</i> 2008; 300: 506-7.                                                             | x                        |                   |                   |
| Greenbaum AH, Wilson LE, Keruly JC, Moore RD, Gebo KA. Effect of age and HAART regimen on clinical response in an urban cohort of HIV-infected individuals. <i>AIDS</i> 2008; 22: 2331-9.                                                                                            |                          | x                 | x                 |
| Greig J, Casas EC, O'Brien DP, Mills EJ, Ford N. Association between older age and adverse outcomes on antiretroviral therapy: a cohort analysis of programme data from nine countries. <i>AIDS</i> 2012; 26 Suppl 1: S31-37.                                                        |                          | x                 | x                 |
| Hambisa MT, Ali A, Dessie Y. Determinants of Mortality among HIV Positives after Initiating Antiretroviral Therapy in Western Ethiopia: A Hospital-Based Retrospective Cohort Study. <i>ISRN AIDS</i> 2013; 2013: 491601.                                                            |                          | x                 | x                 |

|                                                                                                                                                                                                                                                                                          |   |   |   |   |
|------------------------------------------------------------------------------------------------------------------------------------------------------------------------------------------------------------------------------------------------------------------------------------------|---|---|---|---|
| Hawkins C, Chalamilla G, Okuma J, et al. Sex differences in antiretroviral treatment outcomes among HIV-infected adults in an urban Tanzanian setting. <i>AIDS</i> 2011; 25: 1189–97.                                                                                                    |   |   |   | x |
| Hermans S, van Leth F, Manabe Y, Hoepelman A, Lange J, Kambugu A. Earlier initiation of antiretroviral therapy, increased tuberculosis case finding and reduced mortality in a setting of improved HIV care: a retrospective cohort study. <i>HIV Medicine</i> 2012; 13: 337–44.         |   |   |   | x |
| HIV-CAUSAL Collaboration, Ray M, Logan R, et al. The effect of combined antiretroviral therapy on the overall mortality of HIV-infected individuals. <i>AIDS</i> 2010; 24: 123–37.                                                                                                       | x |   |   |   |
| Hoffmann CJ, Fielding KL, Charalambous S, et al. Reducing mortality with cotrimoxazole preventive therapy at initiation of antiretroviral therapy in South Africa. <i>AIDS</i> 2010; 24: 1709–16.                                                                                        |   | x |   | x |
| Hoffmann CJ, Fielding KL, Johnston V, et al. Changing predictors of mortality over time from cART start: implications for care. <i>J Acquir Immune Defic Syndr</i> 2011; 58: 269–76.                                                                                                     |   | x |   |   |
| Hoffmann CJ, Schomaker M, Fox MP, et al. CD4 count slope and mortality in HIV-infected patients on antiretroviral therapy: multicohort analysis from South Africa. <i>J Acquir Immune Defic Syndr</i> 2013; 63: 34–41.                                                                   |   | x |   | x |
| Jensen-Fangel S, Pedersen L, Pedersen C, et al. Low mortality in HIV-infected patients starting highly active antiretroviral therapy: a comparison with the general population. <i>AIDS</i> 2004; 18: 89–97.                                                                             | x |   | x | x |
| Johannessen A, Naman E, Ngowi BJ, et al. Predictors of mortality in HIV-infected patients starting antiretroviral therapy in a rural hospital in Tanzania. <i>BMC Infect Dis</i> 2008; 8: 52.                                                                                            |   |   | x |   |
| Kanters S, Nansubuga M, Mwehira D, et al. Increased mortality among HIV-positive men on antiretroviral therapy: survival difference between sexes explained by late initiation in Uganda. <i>HIV AIDS (Auckl)</i> 2013; 5: 111–9.                                                        |   |   | x |   |
| Karcher H, Omondi A, Odera J, Kunz A, Harms G. Risk factors for treatment denial and loss to follow-up in an antiretroviral treatment cohort in Kenya. <i>Trop Med Int Health</i> 2007; 12: 687–94.                                                                                      | x |   |   |   |
| Keiser O, Chi BH, Gsponer T, et al. Outcomes of antiretroviral treatment in programmes with and without routine viral load monitoring in Southern Africa. <i>AIDS</i> 2011; 25: 1761–9.                                                                                                  | x |   |   |   |
| Kiboneka A, Nyatia RJ, Nabiryo C, et al. Combination antiretroviral therapy in population affected by conflict: outcomes from large cohort in northern Uganda. <i>BMJ</i> 2009; 338: b201.                                                                                               |   |   | x |   |
| Koenig SP, Rodriguez LA, Bartholomew C, et al. Long-term antiretroviral treatment outcomes in seven countries in the Caribbean. <i>J Acquir Immune Defic Syndr</i> 2012; 59: e60–71.                                                                                                     | x |   | x |   |
| Kouanda S, Meda IB, Nikiema L, et al. Determinants and causes of mortality in HIV-infected patients receiving antiretroviral therapy in Burkina Faso: a five-year retrospective cohort study. <i>AIDS Care</i> 2012; 24: 478–90.                                                         |   |   | x | x |
| Laurent C, Bourgeois A, Mpoudi-Ngolé E, et al. Tolerability and effectiveness of first-line regimens combining nevirapine and lamivudine plus zidovudine or stavudine in Cameroon. <i>AIDS Res Hum Retroviruses</i> 2008; 24: 393–9.                                                     |   |   | x |   |
| Liao L, Xing H, Su B, et al. Impact of HIV drug resistance on virologic and immunologic failure and mortality in a cohort of patients on antiretroviral therapy in China. <i>AIDS</i> 2013; 27: 1815–24.                                                                                 |   |   | x |   |
| Lima VD, Harrigan R, Bangsberg DR, et al. The combined effect of modern highly active antiretroviral therapy regimens and adherence on mortality over time. <i>J Acquir Immune Defic Syndr</i> 2009; 50: 529–36.                                                                         |   |   | x |   |
| Lima VD, Hogg RS, Harrigan PR, et al. Continued improvement in survival among HIV-infected individuals with newer forms of highly active antiretroviral therapy. <i>AIDS</i> 2007; 21: 685–92.                                                                                           |   |   | x | x |
| Lohse N, Ladefoged K, Pedersen L, Jensen-Fangel S, Sørensen HT, Obel N. Low effectiveness of highly active antiretroviral therapy and high mortality in the Greenland HIV-infected population. <i>Scand J Infect Dis</i> 2004; 36: 738–42.                                               | x |   |   |   |
| Loubiere S, el Filal KM, Sodqi M, et al. When to initiate highly active antiretroviral therapy in low-resource settings: the Moroccan experience. <i>Antivir Ther (Lond)</i> 2008; 13: 241–51.                                                                                           | x |   |   |   |
| Lowrance D, Makombe S, Harries A, et al. Lower early mortality rates among patients receiving antiretroviral treatment at clinics offering cotrimoxazole prophylaxis in Malawi. <i>J Acquir Immune Defic Syndr</i> 2007; 46: 56–61.                                                      | x |   |   |   |
| Lowrance DW, Ndamage F, Kayirangwa E, et al. Adult clinical and immunologic outcomes of the national antiretroviral treatment program in Rwanda during 2004–2005. <i>J Acquir Immune Defic Syndr</i> 2009; 52: 49–55.                                                                    |   |   | x |   |
| MacPherson P, Moshabela M, Martinson N, Pronyk P. Mortality and loss to follow-up among HAART initiators in rural South Africa. <i>Trans R Soc Trop Med Hyg</i> 2009; 103: 588–93.                                                                                                       |   |   | x |   |
| Maman D, Pujades-Rodriguez M, Nicholas S, et al. Response to antiretroviral therapy: improved survival associated with CD4 above 500 cells/μl. <i>AIDS</i> 2012; 26: 1393–8.                                                                                                             |   |   | x | x |
| Marston BJ, Macharia DK, Nga'nga L, et al. A program to provide antiretroviral therapy to residents of an urban slum in Nairobi, Kenya. <i>J Int Assoc Physicians AIDS Care (Chic)</i> 2007; 6: 106–12.                                                                                  | x |   |   |   |
| Martin LJ, Houston S, Yasui Y, Wild TC, Saunders LD. All-cause and HIV-related mortality rates among HIV-infected patients after initiating highly active antiretroviral therapy: the impact of Aboriginal ethnicity and injection drug use. <i>Can J Public Health</i> 2011; 102: 90–6. |   |   |   | x |
| Maskew M, Brennan AT, MacPhail AP, Sanne IM, Fox MP. Poorer ART outcomes with increasing age at a large public sector HIV clinic in Johannesburg, South Africa. <i>J Int Assoc Physicians AIDS Care (Chic)</i> 2012; 11: 57–65.                                                          |   |   | x | x |
| May M, Boule A, Phiri S, et al. Prognosis of patients with HIV-1 infection starting antiretroviral therapy in sub-Saharan Africa: a collaborative analysis of scale-up programmes. <i>Lancet</i> 2010; 376: 449–57.                                                                      |   |   | x | x |
| May M, Sterne JAC, Sabin C, et al. Prognosis of HIV-1-infected patients up to 5 years after initiation of HAART: collaborative analysis of prospective studies. <i>AIDS</i> 2007; 21: 1185–97.                                                                                           |   |   | x | x |
| May MT, Sterne JAC, Costagliola D, et al. HIV treatment response and prognosis in Europe and North America in the first decade of highly active antiretroviral therapy: a collaborative analysis. <i>Lancet</i> 2006; 368: 451–8.                                                        | x |   |   |   |
| McManus H, O'Connor CC, Boyd M, et al. Long-term survival in HIV positive patients with up to 15 Years of antiretroviral therapy. <i>PLoS ONE</i> 2012; 7: e48839.                                                                                                                       |   |   | x |   |
| Mills EJ, Bakanda C, Birungi J, et al. Life expectancy of persons receiving combination antiretroviral therapy in low-income countries: a cohort analysis from Uganda. <i>Ann Intern Med</i> 2011; 155: 209–16.                                                                          |   |   | x | x |
| Mills EJ, Bakanda C, Birungi J, et al. Male gender predicts mortality in a large cohort of patients receiving antiretroviral therapy in Uganda. <i>J Int AIDS Soc</i> 2011; 14: 52.                                                                                                      |   |   | x | x |
| Mills EJ, Bakanda C, Birungi J, et al. Mortality by baseline CD4 cell count among HIV patients initiating antiretroviral therapy: evidence from a large cohort in Uganda. <i>AIDS</i> 2011; 25: 851–5.                                                                                   |   |   | x | x |
| Moore AL, Kirk O, Johnson AM, et al. Virologic, immunologic, and clinical response to highly active antiretroviral therapy: the gender issue revisited. <i>J Acquir Immune Defic Syndr</i> 2003; 32: 452–61.                                                                             | x |   | x |   |
| Mugavero MJ, Napravnik S, Cole SR, et al. Viremia copy-years predicts mortality among treatment-naive HIV-infected patients initiating antiretroviral therapy. <i>Clin Infect Dis</i> 2011; 53: 927–35.                                                                                  |   |   | x |   |

|                                                                                                                                                                                                                                                                                   |   |   |   |
|-----------------------------------------------------------------------------------------------------------------------------------------------------------------------------------------------------------------------------------------------------------------------------------|---|---|---|
| Mugisha V, Teasdale CA, Wang C, et al. Determinants of Mortality and Loss to Follow-Up among Adults Enrolled in HIV Care Services in Rwanda. <i>PLoS ONE</i> 2014; 9: e85774.                                                                                                     | x |   |   |
| Mujugira A, Wester CW, Kim S, Bussmann H, Gaolathe T. Patients with advanced HIV type 1 infection initiating antiretroviral therapy in Botswana: treatment response and mortality. <i>AIDS Res Hum Retroviruses</i> 2009; 25: 127–33.                                             |   | x |   |
| Mulissa Z, Jerene D, Lindtjorn B. Patients present earlier and survival has improved, but pre-ART attrition is high in a six-year HIV cohort data from Ethiopia. <i>PLoS ONE</i> 2010; 5: e13268.                                                                                 |   | x | x |
| Mutevedzi PC, Lessells RJ, Heller T, Bärnighausen T, Cooke GS, Newell M-L. Scale-up of a decentralized HIV treatment programme in rural KwaZulu-Natal, South Africa: does rapid expansion affect patient outcomes? <i>Bull World Health Organ</i> 2010; 88: 593–600.              |   | x |   |
| Nachega JB, Hislop M, Dowdy DW, et al. Adherence to highly active antiretroviral therapy assessed by pharmacy claims predicts survival in HIV-infected South African adults. <i>J Acquir Immune Defic Syndr</i> 2006; 43: 78–84.                                                  |   | x | x |
| Nglazi MD, Lawn SD, Kaplan R, et al. Changes in programmatic outcomes during 7 years of scale-up at a community-based antiretroviral treatment service in South Africa. <i>J Acquir Immune Defic Syndr</i> 2011; 56: e1–8.                                                        | x | x | x |
| Odafe S, Idoko O, Badru T, et al. Patients' demographic and clinical characteristics and level of care associated with lost to follow-up and mortality in adult patients on first-line ART in Nigerian hospitals. <i>J Int AIDS Soc</i> 2012; 15: 17424.                          | x | x |   |
| Palombi L, Dorrucchi M, Zimba I, et al. Immunologic response to highly active antiretroviral therapy and mortality reduction in a cohort of human immunodeficiency virus-positive persons in Mozambique. <i>Am J Trop Med Hyg</i> 2010; 83: 1128–32.                              |   | x |   |
| Palombi L, Marazzi MC, Guidotti G, et al. Incidence and predictors of death, retention, and switch to second-line regimens in antiretroviral-treated patients in sub-Saharan African Sites with comprehensive monitoring availability. <i>Clin Infect Dis</i> 2009; 48: 115–22.   | x |   |   |
| Peterson I, Togun O, de Silva T, et al. Mortality and immunovirological outcomes on antiretroviral therapy in HIV-1 and HIV-2 infected individuals in the Gambia. <i>AIDS</i> 2011; 25: 2167–75.                                                                                  |   | x |   |
| Poka-Mayap V, Pefura-Yone EW, Kengne AP, Kuaban C. Mortality and its determinants among patients infected with HIV-1 on antiretroviral therapy in a referral centre in Yaounde, Cameroon: a retrospective cohort study. <i>BMJ Open</i> 2013; 3. doi:10.1136/bmjopen-2013-003210. |   | x |   |
| Rai S, Mahapatra B, Sircar S, et al. Adherence to Antiretroviral Therapy and Its Effect on Survival of HIV-Infected Individuals in Jharkhand, India. <i>PLoS ONE</i> 2013; 8: e66860.                                                                                             |   | x | x |
| Rasschaert F, Koole O, Zachariah R, Lynen L, Manzi M, Van Damme W. Short and long term retention in antiretroviral care in health facilities in rural Malawi and Zimbabwe. <i>BMC Health Serv Res</i> 2012; 12: 444.                                                              | x |   |   |
| Russell EC, Charalambous S, Pemba L, Churchyard GJ, Grant AD, Fielding K. Low haemoglobin predicts early mortality among adults starting antiretroviral therapy in an HIV care programme in South Africa: a cohort study. <i>BMC Public Health</i> 2010; 10: 433.                 |   | x | x |
| Sanne IM, Westreich D, Macphail AP, Rubel D, Majuba P, Van Rie A. Long term outcomes of antiretroviral therapy in a large HIV/AIDS care clinic in urban South Africa: a prospective cohort study. <i>J Int AIDS Soc</i> 2009; 12: 38.                                             | x |   |   |
| Schöni-Affolter F, Keiser O, Mwangi A, et al. Estimating loss to follow-up in HIV-infected patients on antiretroviral therapy: the effect of the competing risk of death in Zambia and Switzerland. <i>PLoS ONE</i> 2011; 6: e27919.                                              | x |   |   |
| Seyler C, Anglaret X, Dakoury-Dogbo N, et al. Medium-term survival, morbidity and immunovirological evolution in HIV-infected adults receiving antiretroviral therapy, Abidjan, Côte d'Ivoire. <i>Antivir Ther (Lond)</i> 2003; 8: 385–93.                                        |   | x |   |
| Silverberg MJ, Leyden W, Quesenberry CP Jr, Horberg MA. Race/ethnicity and risk of AIDS and death among HIV-infected patients with access to care. <i>J Gen Intern Med</i> 2009; 24: 1065–72.                                                                                     | x | x |   |
| Somi G, Keogh SC, Todd J, et al. Low mortality risk but high loss to follow-up among patients in the Tanzanian national HIV care and treatment programme. <i>Trop Med Int Health</i> 2012; 17: 497–506.                                                                           | x | x | x |
| Stringer JSA, Zulu I, Levy J, et al. Rapid scale-up of antiretroviral therapy at primary care sites in Zambia: feasibility and early outcomes. <i>JAMA</i> 2006; 296: 782–93.                                                                                                     |   | x | x |
| Thai S, Koole O, Un P, et al. Five-year experience with scaling-up access to antiretroviral treatment in an HIV care programme in Cambodia. <i>Trop Med Int Health</i> 2009; 14: 1048–58.                                                                                         |   | x |   |
| Tsertsvadze T, Chkhartishvili N, Sharvadze L, et al. Outcomes of Universal Access to Antiretroviral Therapy (ART) in Georgia. <i>AIDS Res Treat</i> 2011; 2011: 621078.                                                                                                           |   | x |   |
| Tuboï SH, Schechter M, McGowan CC, et al. Mortality during the first year of potent antiretroviral therapy in HIV-1-infected patients in 7 sites throughout Latin America and the Caribbean. <i>J Acquir Immune Defic Syndr</i> 2009; 51: 615–23.                                 | x | x |   |
| Van der Borgh SF, Clevenbergh P, Rijckborst H, et al. Mortality and morbidity among HIV type-1-infected patients during the first 5 years of a multicountry HIV workplace programme in Africa. <i>Antivir Ther (Lond)</i> 2009; 14: 63–74.                                        |   | x | x |
| Van Griensven J, Thai S. Predictors of immune recovery and the association with late mortality while on antiretroviral treatment in Cambodia. <i>Trans R Soc Trop Med Hyg</i> 2011; 105: 694–703.                                                                                 |   | x | x |
| Velen K, Lewis JJ, Charalambous S, Grant AD, Churchyard GJ, Hoffmann CJ. Comparison of tenofovir, zidovudine, or stavudine as part of first-line antiretroviral therapy in a resource-limited-setting: a cohort study. <i>PLoS ONE</i> 2013; 8: e64459.                           |   | x |   |
| Wandeler G, Keiser O, Pfeiffer K, et al. Outcomes of antiretroviral treatment programs in rural Southern Africa. <i>J Acquir Immune Defic Syndr</i> 2012; 59: e9–16.                                                                                                              | x | x | x |
| When To Start Consortium, Sterne JAC, May M, et al. Timing of initiation of antiretroviral therapy in AIDS-free HIV-1-infected patients: a collaborative analysis of 18 HIV cohort studies. <i>Lancet</i> 2009; 373: 1352–63.                                                     | x |   |   |
| Willig JH, Westfall AO, Mugavero M, et al. Effect of persistency of first-line HIV antiretroviral therapy on clinical outcomes. <i>AIDS Res Hum Retroviruses</i> 2013; 29: 698–703.                                                                                               |   | x |   |
| Wolff MJ, Cortés CP, Shepherd BE, Beltrán CJ, Chilean AIDS Cohort Study Group. Long-term outcomes of a national expanded access program to antiretroviral therapy: the Chilean AIDS cohort. <i>J Acquir Immune Defic Syndr</i> 2010; 55: 368–74.                                  |   | x |   |
| Wubshet M, Berhane Y, Worku A, Kebede Y, Diro E. High loss to followup and early mortality create substantial reduction in patient retention at antiretroviral treatment program in north-west ethiopia. <i>ISRN AIDS</i> 2012; 2012: 721720.                                     | x | x |   |
| Zhu H, Napravnik S, Eron JJ, et al. Decreasing excess mortality of HIV-infected patients initiating antiretroviral therapy: comparison with mortality in general population in China, 2003-2009. <i>J Acquir Immune Defic Syndr</i> 2013; 63: e150–157.                           |   | x | x |



**Appendix Table 3a. HIV-specific mortality rates for patients on ART in all sub-Saharan African sites by time since ART initiation, sex, initial CD4 and age (per 100 person-years)**

| Time period | Initial CD4 | Female        |               |               |               |               | Male           |               |               |               |                |
|-------------|-------------|---------------|---------------|---------------|---------------|---------------|----------------|---------------|---------------|---------------|----------------|
|             |             | 15-24         | 25-34         | 35-44         | 45-54         | 55+           | 15-24          | 25-34         | 35-44         | 45-54         | 55+            |
| 0-6         | <50         | 44.2          | 40.6          | 41.5          | 40.4          | 51.9          | 57.8           | 53.1          | 54.4          | 52.8          | 68.8           |
|             |             | (22.7 - 79.0) | (20.4 - 71.5) | (21.2 - 74.6) | (20.2 - 73.2) | (24.8 - 94.7) | (29.4 - 102.2) | (26.5 - 93.5) | (28.2 - 96.4) | (26.6 - 95.6) | (32.7 - 126.1) |
| 0-6         | 50-99       | 19.0          | 17.4          | 17.7          | 16.9          | 20.2          | 24.8           | 22.8          | 23.2          | 22.2          | 27.4           |
|             |             | (13.6 - 27.7) | (12.2 - 25.0) | (12.9 - 25.1) | (11.6 - 24.9) | (13.4 - 30.2) | (17.7 - 36.0)  | (16.2 - 32.4) | (17.2 - 33.0) | (15.1 - 33.0) | (18.7 - 40.9)  |
| 0-6         | 100-199     | 15.4          | 14.1          | 14.2          | 13.6          | 15.6          | 20.1           | 18.4          | 18.7          | 17.8          | 21.4           |
|             |             | (11.5 - 20.3) | (10.4 - 18.4) | (10.9 - 18.1) | (9.7 - 18.5)  | (10.7 - 21.5) | (14.8 - 26.6)  | (13.6 - 24.2) | (14.3 - 23.8) | (12.6 - 24.2) | (15.0 - 29.3)  |
| 0-6         | 200-249     | 13.6          | 12.5          | 12.6          | 11.9          | 13.4          | 17.8           | 16.3          | 16.5          | 15.7          | 18.5           |
|             |             | (9.8 - 18.1)  | (8.9 - 16.6)  | (9.3 - 16.3)  | (8.3 - 16.5)  | (8.6 - 19.0)  | (12.9 - 23.7)  | (11.6 - 21.7) | (12.2 - 21.3) | (10.8 - 21.4) | (12.2 - 25.8)  |
| 0-6         | 250-349     | 11.7          | 10.7          | 10.8          | 10.2          | 11.0          | 15.3           | 14.0          | 14.2          | 13.3          | 15.4           |
|             |             | (7.7 - 16.3)  | (7.0 - 14.8)  | (7.3 - 14.7)  | (6.5 - 14.6)  | (5.9 - 16.5)  | (10.2 - 21.4)  | (9.3 - 19.4)  | (9.7 - 19.4)  | (8.6 - 19.1)  | (8.8 - 22.7)   |
| 0-6         | 350-499     | 8.9           | 8.1           | 8.1           | 7.5           | 7.4           | 11.6           | 10.5          | 10.6          | 9.8           | 10.7           |
|             |             | (5.1 - 13.5)  | (4.7 - 12.0)  | (4.6 - 12.0)  | (4.0 - 12.1)  | (2.7 - 13.3)  | (6.8 - 17.7)   | (6.0 - 15.8)  | (6.2 - 15.8)  | (5.4 - 15.8)  | (4.6 - 18.3)   |
| 0-6         | 500+        | 7.0           | 6.3           | 6.3           | 5.8           | 5.2           | 9.1            | 8.2           | 8.3           | 7.6           | 7.7            |
|             |             | (1.2 - 12.6)  | (0.9 - 11.0)  | (0.8 - 11.3)  | (0.4 - 11.0)  | (0.0 - 12.1)  | (1.5 - 16.5)   | (1.2 - 14.7)  | (1.1 - 14.8)  | (0.5 - 14.5)  | (0.0 - 16.8)   |
| 7-12        | <50         | 9.8           | 8.9           | 8.9           | 8.4           | 8.6           | 12.8           | 11.6          | 11.7          | 11.0          | 12.2           |
|             |             | (6.6 - 14.5)  | (6.0 - 13.4)  | (6.2 - 13.2)  | (5.4 - 13.0)  | (4.5 - 15.0)  | (8.5 - 19.0)   | (7.9 - 17.5)  | (8.0 - 17.4)  | (7.1 - 17.2)  | (7.0 - 20.3)   |
| 7-12        | 50-99       | 7.2           | 6.5           | 6.5           | 6.0           | 5.3           | 9.4            | 8.6           | 8.6           | 7.9           | 8.0            |
|             |             | (5.5 - 9.5)   | (5.0 - 8.4)   | (5.1 - 8.4)   | (4.3 - 8.5)   | (3.2 - 8.0)   | (7.1 - 12.5)   | (6.5 - 11.2)  | (6.7 - 11.1)  | (5.6 - 11.4)  | (5.2 - 11.7)   |
| 7-12        | 100-199     | 6.3           | 5.7           | 5.7           | 5.1           | 4.2           | 8.2            | 7.4           | 7.4           | 6.7           | 6.5            |
|             |             | (4.9 - 7.9)   | (4.4 - 7.2)   | (4.6 - 6.8)   | (3.7 - 6.9)   | (2.4 - 6.1)   | (6.5 - 10.4)   | (5.8 - 9.5)   | (6.0 - 9.0)   | (4.9 - 9.2)   | (4.2 - 9.2)    |
| 7-12        | 200-249     | 5.6           | 5.1           | 5.0           | 4.5           | 3.3           | 7.4            | 6.6           | 6.6           | 5.9           | 5.4            |
|             |             | (4.2 - 7.3)   | (3.8 - 6.5)   | (3.9 - 6.3)   | (3.1 - 6.2)   | (1.7 - 5.3)   | (5.5 - 9.6)    | (4.9 - 8.6)   | (5.1 - 8.3)   | (4.1 - 8.2)   | (3.1 - 8.1)    |
| 7-12        | 350-349     | 4.9           | 4.4           | 4.3           | 3.8           | 2.4           | 6.3            | 5.7           | 5.6           | 5.0           | 4.1            |
|             |             | (3.4 - 6.5)   | (3.0 - 6.0)   | (3.0 - 5.6)   | (2.4 - 5.5)   | (0.5 - 4.4)   | (4.4 - 8.7)    | (3.9 - 7.8)   | (3.9 - 7.4)   | (3.1 - 7.2)   | (1.6 - 6.9)    |
| 7-12        | 350-499     | 3.5           | 3.1           | 3.0           | 2.5           | 0.8           | 4.6            | 4.1           | 4.0           | 3.3           | 1.9            |
|             |             | (2.2 - 5.1)   | (1.8 - 4.8)   | (1.8 - 4.5)   | (1.2 - 4.2)   | (0.0 - 2.7)   | (2.8 - 6.7)    | (2.4 - 6.2)   | (2.4 - 5.9)   | (1.6 - 5.5)   | (0.0 - 4.6)    |
| 7-12        | 500+        | 2.6           | 2.3           | 2.2           | 1.7           | 0.4           | 3.4            | 3.0           | 2.9           | 2.3           | 1.0            |
|             |             | (0.2 - 4.9)   | (0.1 - 4.4)   | (0.0 - 4.2)   | (0.0 - 3.8)   | (0.0 - 2.3)   | (0.3 - 6.3)    | (0.1 - 5.7)   | (0.0 - 5.5)   | (0.0 - 5.0)   | (0.0 - 3.9)    |
| 13-24       | <50         | 4.5           | 4.0           | 3.9           | 3.4           | 1.9           | 5.8            | 5.2           | 5.2           | 4.5           | 3.4            |
|             |             | (3.1 - 6.4)   | (2.7 - 5.7)   | (2.7 - 5.7)   | (2.1 - 5.3)   | (0.2 - 4.3)   | (4.0 - 8.4)    | (3.6 - 7.5)   | (3.6 - 7.5)   | (2.8 - 6.9)   | (1.2 - 6.7)    |
| 13-24       | 50-99       | 3.3           | 3.0           | 2.9           | 2.4           | 0.5           | 4.4            | 3.9           | 3.8           | 3.2           | 1.6            |
|             |             | (2.5 - 4.4)   | (2.3 - 3.9)   | (2.3 - 3.7)   | (1.6 - 3.4)   | (0.0 - 1.7)   | (3.3 - 5.7)    | (3.0 - 5.1)   | (3.0 - 4.9)   | (2.1 - 4.4)   | (0.4 - 3.2)    |
| 13-24       | 100-199     | 3.0           | 2.6           | 2.5           | 2.0           | 0.2           | 3.9            | 3.4           | 3.3           | 2.7           | 1.0            |
|             |             | (2.3 - 3.7)   | (2.0 - 3.3)   | (2.0 - 3.0)   | (1.4 - 2.8)   | (0.0 - 0.8)   | (3.0 - 4.9)    | (2.6 - 4.3)   | (2.7 - 4.0)   | (1.8 - 3.7)   | (0.0 - 2.1)    |
| 13-24       | 200-249     | 2.7           | 2.4           | 2.3           | 1.8           | 0.1           | 3.5            | 3.1           | 3.0           | 2.4           | 0.6            |
|             |             | (2.1 - 3.5)   | (1.8 - 3.1)   | (1.7 - 2.8)   | (1.1 - 2.6)   | (0.0 - 0.6)   | (2.7 - 4.5)    | (2.3 - 4.0)   | (2.3 - 3.7)   | (1.5 - 3.4)   | (0.0 - 1.8)    |
| 13-24       | 250-349     | 2.3           | 2.0           | 1.9           | 1.4           | 0.0           | 3.0            | 2.6           | 2.5           | 1.9           | 0.2            |
|             |             | (1.7 - 3.1)   | (1.4 - 2.7)   | (1.3 - 2.5)   | (0.8 - 2.2)   | (0.0 - 0.2)   | (2.2 - 4.1)    | (1.8 - 3.6)   | (1.8 - 3.3)   | (1.0 - 2.9)   | (0.0 - 1.2)    |
| 13-24       | 350-499     | 1.6           | 1.4           | 1.2           | 0.8           | 0.0           | 2.1            | 1.8           | 1.6           | 1.0           | 0.0            |
|             |             | (0.9 - 2.5)   | (0.7 - 2.2)   | (0.5 - 2.0)   | (0.1 - 1.7)   | (0.0 - 0.0)   | (1.2 - 3.3)    | (1.0 - 2.8)   | (0.8 - 2.6)   | (0.1 - 2.3)   | (0.0 - 0.2)    |
| 13-24       | 500+        | 1.1           | 0.9           | 0.8           | 0.4           | 0.0           | 1.5            | 1.2           | 1.0           | 0.6           | 0.0            |
|             |             | (0.0 - 2.4)   | (0.0 - 2.0)   | (0.0 - 1.8)   | (0.0 - 1.6)   | (0.0 - 0.0)   | (0.0 - 3.1)    | (0.0 - 2.6)   | (0.0 - 2.4)   | (0.0 - 2.1)   | (0.0 - 0.0)    |

**Appendix Table 3b. HIV-specific mortality rates for patients on ART in LMIC countries outside of sub-Saharan Africa by time since ART initiation, sex, initial CD4 and age (per 100 person-years)**

| Time period | Initial CD4 | Female              |                     |                     |                     |                     | Male                |                     |                     |                     |                      |
|-------------|-------------|---------------------|---------------------|---------------------|---------------------|---------------------|---------------------|---------------------|---------------------|---------------------|----------------------|
|             |             | 15-24               | 25-34               | 35-44               | 45-54               | 55+                 | 15-24               | 25-34               | 35-44               | 45-54               | 55+                  |
| 0-6         | <50         | 25.0<br>(11.1-51.3) | 23.1<br>(10.5-48.0) | 23.6<br>(10.9-49.3) | 23.0<br>(10.3-47.9) | 27.9<br>(11.3-63.5) | 42.3<br>(19.2-87.3) | 39.1<br>(18.1-79.9) | 40.1<br>(18.8-85.3) | 39.3<br>(17.5-80.8) | 49.4<br>(20.9-109.9) |
| 0-6         | 50-99       | 11.4<br>(6.6-18.5)  | 10.5<br>(6.1-16.9)  | 10.7<br>(6.3-17.1)  | 10.3<br>(5.7-16.9)  | 10.9<br>(5.0-19.3)  | 19.4<br>(11.5-31.2) | 17.9<br>(10.6-28.2) | 18.3<br>(11.0-28.8) | 17.7<br>(9.9-28.4)  | 20.8<br>(10.8-35.3)  |
| 0-6         | 100-199     | 8.2<br>(5.1-12.6)   | 7.5<br>(4.6-11.4)   | 7.6<br>(4.6-11.6)   | 7.2<br>(4.1-11.4)   | 6.8<br>(2.9-12.3)   | 13.9<br>(8.6-21.5)  | 12.8<br>(8.0-19.4)  | 13.0<br>(8.2-19.8)  | 12.5<br>(7.5-19.7)  | 13.9<br>(7.4-23.2)   |
| 0-6         | 200-249     | 6.8<br>(3.9-11.1)   | 6.3<br>(3.5-9.9)    | 6.3<br>(3.6-9.9)    | 5.9<br>(3.0-9.6)    | 5.2<br>(1.5-10.3)   | 11.6<br>(6.9-18.6)  | 10.7<br>(6.1-17.2)  | 10.8<br>(6.4-16.7)  | 10.3<br>(5.7-16.8)  | 11.0<br>(5.2-20.2)   |
| 0-6         | 250-349     | 5.5<br>(2.9-9.3)    | 5.0<br>(2.6-8.4)    | 5.0<br>(2.7-8.4)    | 4.6<br>(2.2-8.1)    | 3.5<br>(0.3-8.1)    | 9.3<br>(5.0-15.3)   | 8.6<br>(4.4-14.6)   | 8.7<br>(4.5-14.7)   | 8.2<br>(4.1-13.8)   | 8.2<br>(2.8-16.1)    |
| 0-6         | 350-499     | 3.7<br>(1.5-6.9)    | 3.3<br>(1.3-6.4)    | 3.3<br>(1.2-6.3)    | 2.9<br>(0.8-5.9)    | 1.4<br>(0.0-5.2)    | 6.2<br>(2.6-11.5)   | 5.7<br>(2.3-10.9)   | 5.7<br>(2.3-10.8)   | 5.2<br>(1.8-10.1)   | 4.3<br>(0.0-10.9)    |
| 0-6         | 500+        | 2.5<br>(0.1-6.2)    | 2.3<br>(0.0-5.8)    | 2.2<br>(0.0-5.8)    | 1.9<br>(0.0-5.4)    | 0.7<br>(0.0-4.5)    | 4.4<br>(0.2-10.4)   | 4.0<br>(0.1-9.5)    | 3.9<br>(0.0-9.4)    | 3.5<br>(0.0-9.1)    | 2.5<br>(0.0-9.7)     |
| 7-12        | <50         | 6.6<br>(4.0-10.6)   | 6.0<br>(3.8-9.8)    | 6.1<br>(3.7-9.9)    | 5.7<br>(3.2-9.5)    | 4.8<br>(1.7-9.8)    | 11.2<br>(6.8-17.2)  | 10.3<br>(6.5-16.3)  | 10.4<br>(6.6-16.3)  | 9.9<br>(5.9-16.4)   | 10.5<br>(5.2-18.6)   |
| 7-12        | 50-99       | 4.7<br>(3.2-6.7)    | 4.3<br>(3.0-6.1)    | 4.3<br>(3.0-6.0)    | 3.9<br>(2.5-5.7)    | 2.5<br>(0.7-4.9)    | 8.0<br>(5.5-11.2)   | 7.3<br>(5.2-10.2)   | 7.4<br>(5.2-10.1)   | 6.9<br>(4.5-9.8)    | 6.5<br>(3.4-10.2)    |
| 7-12        | 100-199     | 3.9<br>(2.8-5.4)    | 3.6<br>(2.5-4.9)    | 3.5<br>(2.5-4.8)    | 3.2<br>(2.1-4.7)    | 1.5<br>(0.0-3.4)    | 6.7<br>(4.8-9.4)    | 6.1<br>(4.4-8.3)    | 6.2<br>(4.5-8.3)    | 5.7<br>(3.8-8.1)    | 4.9<br>(2.5-7.8)     |
| 7-12        | 200-249     | 3.5<br>(2.4-5.0)    | 3.2<br>(2.2-4.5)    | 3.1<br>(2.1-4.5)    | 2.8<br>(1.7-4.3)    | 1.0<br>(0.0-2.8)    | 6.0<br>(4.1-8.4)    | 5.5<br>(3.8-7.6)    | 5.5<br>(3.8-7.5)    | 5.0<br>(3.2-7.4)    | 4.0<br>(1.7-7.0)     |
| 7-12        | 350-349     | 3.0<br>(2.0-4.4)    | 2.7<br>(1.8-4.0)    | 2.7<br>(1.8-3.9)    | 2.3<br>(1.3-3.7)    | 0.5<br>(0.0-2.1)    | 5.2<br>(3.4-7.4)    | 4.7<br>(3.1-6.7)    | 4.7<br>(3.1-6.7)    | 4.3<br>(2.6-6.5)    | 3.0<br>(0.9-5.9)     |
| 7-12        | 350-499     | 2.3<br>(1.2-3.6)    | 2.0<br>(1.1-3.3)    | 1.9<br>(1.0-3.2)    | 1.6<br>(0.6-3.0)    | 0.1<br>(0.0-1.1)    | 3.9<br>(2.2-6.1)    | 3.5<br>(1.9-5.6)    | 3.5<br>(1.8-5.5)    | 3.0<br>(1.3-5.3)    | 1.4<br>(0.0-4.2)     |
| 7-12        | 500+        | 1.7<br>(0.1-3.4)    | 1.5<br>(0.0-3.0)    | 1.5<br>(0.0-3.0)    | 1.1<br>(0.0-2.7)    | 0.1<br>(0.0-0.8)    | 3.0<br>(0.3-5.7)    | 2.7<br>(0.1-5.2)    | 2.6<br>(0.0-5.2)    | 2.2<br>(0.0-4.9)    | 0.8<br>(0.0-3.6)     |
| 13-24       | <50         | 4.3<br>(2.8-6.8)    | 3.9<br>(2.6-6.0)    | 3.9<br>(2.6-6.1)    | 3.5<br>(2.1-5.7)    | 2.0<br>(0.2-4.9)    | 7.4<br>(4.9-11.3)   | 6.7<br>(4.6-10.2)   | 6.8<br>(4.6-10.3)   | 6.3<br>(3.9-9.7)    | 5.7<br>(2.6-10.2)    |
| 13-24       | 50-99       | 3.2<br>(2.2-4.7)    | 2.9<br>(2.0-4.1)    | 2.9<br>(2.0-4.1)    | 2.5<br>(1.6-3.8)    | 0.7<br>(0.0-2.3)    | 5.5<br>(3.8-7.8)    | 5.0<br>(3.5-7.1)    | 5.0<br>(3.5-7.1)    | 4.6<br>(2.9-6.8)    | 3.4<br>(1.3-6.2)     |
| 13-24       | 100-199     | 2.8<br>(1.9-4.3)    | 2.6<br>(1.7-3.7)    | 2.5<br>(1.7-3.6)    | 2.1<br>(1.3-3.3)    | 0.3<br>(0.0-1.7)    | 4.9<br>(3.4-7.0)    | 4.4<br>(3.1-6.2)    | 4.4<br>(3.1-6.2)    | 3.9<br>(2.5-5.8)    | 2.6<br>(0.8-5.0)     |
| 13-24       | 200-249     | 2.6<br>(1.8-3.9)    | 2.4<br>(1.6-3.4)    | 2.3<br>(1.5-3.4)    | 1.9<br>(1.1-3.1)    | 0.2<br>(0.0-1.4)    | 4.5<br>(3.0-6.4)    | 4.1<br>(2.8-5.8)    | 4.0<br>(2.7-5.7)    | 3.6<br>(2.3-5.3)    | 2.1<br>(0.4-4.5)     |
| 13-24       | 250-349     | 2.3<br>(1.5-3.4)    | 2.1<br>(1.3-3.0)    | 2.0<br>(1.2-3.0)    | 1.6<br>(0.9-2.7)    | 0.1<br>(0.0-0.8)    | 4.0<br>(2.6-5.7)    | 3.6<br>(2.3-5.1)    | 3.5<br>(2.3-5.1)    | 3.1<br>(1.8-4.8)    | 1.5<br>(0.0-3.6)     |
| 13-24       | 350-499     | 1.7<br>(0.9-2.6)    | 1.5<br>(0.8-2.3)    | 1.4<br>(0.7-2.3)    | 1.1<br>(0.4-2.0)    | 0.0<br>(0.0-0.0)    | 2.9<br>(1.7-4.5)    | 2.6<br>(1.5-3.9)    | 2.5<br>(1.4-3.9)    | 2.1<br>(0.9-3.6)    | 0.4<br>(0.0-2.0)     |
| 13-24       | 500+        | 1.2<br>(0.1-2.4)    | 1.1<br>(0.0-2.1)    | 1.0<br>(0.0-2.1)    | 0.7<br>(0.0-1.8)    | 0.0<br>(0.0-0.0)    | 2.2<br>(0.2-4.2)    | 1.9<br>(0.1-3.6)    | 1.8<br>(0.0-3.6)    | 1.4<br>(0.0-3.3)    | 0.2<br>(0.0-1.5)     |

**Appendix Table 3c. HIV-specific mortality rates for patients on ART in high income countries by time since ART initiation, sex, initial CD4 and age (per 100 person-years)**

| Time period | Initial CD4 | Female            |                   |                   |                   |                   | Male              |                   |                   |                   |                   |
|-------------|-------------|-------------------|-------------------|-------------------|-------------------|-------------------|-------------------|-------------------|-------------------|-------------------|-------------------|
|             |             | 15-24             | 25-34             | 35-44             | 45-54             | 55+               | 15-24             | 25-34             | 35-44             | 45-54             | 55+               |
| 0-6         | <50         | 5.5<br>(2.2-11.7) | 6.1<br>(2.9-12.3) | 7.5<br>(3.8-14.3) | 8.9<br>(3.7-18.7) | 6.6<br>(1.4-16.0) | 6.2<br>(2.4-13.2) | 6.8<br>(3.2-13.8) | 8.3<br>(4.1-15.8) | 9.8<br>(4.0-20.8) | 7.4<br>(1.6-17.9) |
| 0-6         | 50-99       | 3.1<br>(1.2-6.2)  | 3.4<br>(1.7-6.5)  | 4.2<br>(2.2-7.4)  | 4.9<br>(2.1-9.5)  | 2.4<br>(0.0-7.2)  | 3.4<br>(1.4-7.1)  | 3.8<br>(1.8-7.2)  | 4.6<br>(2.4-8.4)  | 5.3<br>(2.2-10.7) | 2.7<br>(0.0-8.0)  |
| 0-6         | 100-199     | 1.9<br>(0.8-3.6)  | 2.0<br>(1.1-3.6)  | 2.5<br>(1.5-4.0)  | 2.8<br>(1.3-5.2)  | 0.5<br>(0.0-2.6)  | 2.0<br>(0.9-3.9)  | 2.2<br>(1.2-3.9)  | 2.7<br>(1.5-4.4)  | 3.0<br>(1.3-5.6)  | 0.6<br>(0.0-2.9)  |
| 0-6         | 200-249     | 1.0<br>(0.4-1.9)  | 1.1<br>(0.6-1.9)  | 1.3<br>(0.8-2.1)  | 1.4<br>(0.7-2.7)  | 0.0<br>(0.0-0.0)  | 1.1<br>(0.4-2.1)  | 1.2<br>(0.6-2.1)  | 1.4<br>(0.8-2.2)  | 1.4<br>(0.6-2.8)  | 0.0<br>(0.0-0.0)  |
| 0-6         | 250-349     | 0.6<br>(0.3-1.2)  | 0.7<br>(0.3-1.2)  | 0.8<br>(0.5-1.3)  | 0.8<br>(0.3-1.6)  | 0.0<br>(0.0-0.0)  | 0.7<br>(0.3-1.3)  | 0.7<br>(0.3-1.3)  | 0.8<br>(0.4-1.4)  | 0.8<br>(0.2-1.7)  | 0.0<br>(0.0-0.0)  |
| 0-6         | 350-499     | 0.4<br>(0.2-0.8)  | 0.5<br>(0.2-0.9)  | 0.5<br>(0.2-0.9)  | 0.5<br>(0.1-1.1)  | 0.0<br>(0.0-0.0)  | 0.4<br>(0.1-0.9)  | 0.5<br>(0.2-0.9)  | 0.5<br>(0.2-1.0)  | 0.4<br>(0.0-1.0)  | 0.0<br>(0.0-0.0)  |
| 0-6         | 500+        | 0.3<br>(0.1-0.7)  | 0.3<br>(0.1-0.7)  | 0.3<br>(0.1-0.7)  | 0.3<br>(0.0-0.8)  | 0.0<br>(0.0-0.0)  | 0.3<br>(0.0-0.7)  | 0.3<br>(0.0-0.7)  | 0.3<br>(0.0-0.7)  | 0.2<br>(0.0-0.7)  | 0.0<br>(0.0-0.0)  |
| 7-12        | <50         | 4.4<br>(1.7-9.5)  | 4.9<br>(2.3-10.0) | 5.9<br>(2.9-11.6) | 7.0<br>(2.9-14.8) | 4.7<br>(0.5-12.8) | 4.9<br>(1.8-10.6) | 5.4<br>(2.5-11.1) | 6.6<br>(3.2-13.2) | 7.7<br>(3.1-16.5) | 5.2<br>(0.5-14.5) |
| 7-12        | 50-99       | 2.6<br>(1.1-5.5)  | 2.9<br>(1.5-5.7)  | 3.5<br>(1.9-6.3)  | 4.1<br>(1.8-8.1)  | 1.6<br>(0.0-5.7)  | 2.9<br>(1.2-6.1)  | 3.2<br>(1.6-6.3)  | 3.8<br>(2.1-7.0)  | 4.4<br>(1.9-9.1)  | 1.7<br>(0.0-6.2)  |
| 7-12        | 100-199     | 1.9<br>(0.8-3.7)  | 2.1<br>(1.1-3.7)  | 2.5<br>(1.4-4.2)  | 2.9<br>(1.4-5.5)  | 0.5<br>(0.0-2.8)  | 2.1<br>(0.8-4.1)  | 2.3<br>(1.2-4.0)  | 2.7<br>(1.5-4.6)  | 3.1<br>(1.3-5.9)  | 0.6<br>(0.0-3.0)  |
| 7-12        | 200-249     | 1.3<br>(0.6-2.5)  | 1.4<br>(0.8-2.4)  | 1.7<br>(1.0-2.7)  | 1.9<br>(0.9-3.4)  | 0.1<br>(0.0-0.8)  | 1.4<br>(0.6-2.7)  | 1.5<br>(0.8-2.6)  | 1.8<br>(1.1-2.9)  | 2.0<br>(0.8-3.6)  | 0.1<br>(0.0-0.8)  |
| 7-12        | 350-349     | 0.8<br>(0.3-1.6)  | 0.9<br>(0.5-1.6)  | 1.1<br>(0.6-1.7)  | 1.2<br>(0.5-2.2)  | 0.0<br>(0.0-0.0)  | 0.9<br>(0.4-1.7)  | 1.0<br>(0.5-1.7)  | 1.1<br>(0.6-1.9)  | 1.1<br>(0.4-2.2)  | 0.0<br>(0.0-0.0)  |
| 7-12        | 350-499     | 0.5<br>(0.2-1.0)  | 0.5<br>(0.2-1.0)  | 0.6<br>(0.3-1.1)  | 0.6<br>(0.2-1.3)  | 0.0<br>(0.0-0.0)  | 0.5<br>(0.2-1.0)  | 0.5<br>(0.2-1.0)  | 0.6<br>(0.2-1.1)  | 0.5<br>(0.0-1.2)  | 0.0<br>(0.0-0.0)  |
| 7-12        | 500+        | 0.3<br>(0.1-0.6)  | 0.3<br>(0.1-0.6)  | 0.3<br>(0.0-0.7)  | 0.2<br>(0.0-0.8)  | 0.0<br>(0.0-0.0)  | 0.3<br>(0.0-0.7)  | 0.3<br>(0.0-0.7)  | 0.3<br>(0.0-0.7)  | 0.1<br>(0.0-0.7)  | 0.0<br>(0.0-0.0)  |
| 13-24       | <50         | 3.4<br>(1.4-7.8)  | 3.7<br>(1.7-7.7)  | 4.5<br>(2.3-8.5)  | 5.3<br>(2.3-10.6) | 2.8<br>(0.0-8.4)  | 3.7<br>(1.5-8.8)  | 4.1<br>(1.9-8.4)  | 4.9<br>(2.5-9.4)  | 5.7<br>(2.4-11.7) | 3.1<br>(0.0-9.5)  |
| 13-24       | 50-99       | 2.1<br>(0.9-4.1)  | 2.3<br>(1.2-3.9)  | 2.8<br>(1.6-4.5)  | 3.2<br>(1.5-5.8)  | 0.8<br>(0.0-3.4)  | 2.3<br>(0.9-4.6)  | 2.5<br>(1.3-4.3)  | 3.0<br>(1.7-5.0)  | 3.4<br>(1.6-6.4)  | 0.9<br>(0.0-3.7)  |
| 13-24       | 100-199     | 1.4<br>(0.6-2.7)  | 1.6<br>(0.9-2.7)  | 1.9<br>(1.2-3.0)  | 2.1<br>(1.1-3.9)  | 0.1<br>(0.0-1.3)  | 1.6<br>(0.7-3.1)  | 1.7<br>(0.9-3.0)  | 2.0<br>(1.2-3.4)  | 2.2<br>(1.0-4.2)  | 0.1<br>(0.0-1.4)  |
| 13-24       | 200-249     | 1.0<br>(0.4-1.9)  | 1.1<br>(0.6-1.8)  | 1.2<br>(0.8-2.0)  | 1.4<br>(0.6-2.6)  | 0.0<br>(0.0-0.0)  | 1.0<br>(0.4-2.1)  | 1.1<br>(0.6-2.0)  | 1.3<br>(0.8-2.2)  | 1.4<br>(0.5-2.7)  | 0.0<br>(0.0-0.0)  |
| 13-24       | 250-349     | 0.7<br>(0.3-1.3)  | 0.7<br>(0.4-1.3)  | 0.8<br>(0.5-1.4)  | 0.9<br>(0.4-1.8)  | 0.0<br>(0.0-0.0)  | 0.7<br>(0.3-1.4)  | 0.8<br>(0.4-1.4)  | 0.9<br>(0.5-1.5)  | 0.8<br>(0.3-1.8)  | 0.0<br>(0.0-0.0)  |
| 13-24       | 350-499     | 0.5<br>(0.2-0.9)  | 0.5<br>(0.3-0.9)  | 0.6<br>(0.3-1.0)  | 0.6<br>(0.2-1.2)  | 0.0<br>(0.0-0.0)  | 0.5<br>(0.2-1.0)  | 0.5<br>(0.2-0.9)  | 0.6<br>(0.3-1.0)  | 0.5<br>(0.0-1.2)  | 0.0<br>(0.0-0.0)  |
| 13-24       | 500+        | 0.3<br>(0.1-0.7)  | 0.3<br>(0.1-0.6)  | 0.3<br>(0.1-0.7)  | 0.3<br>(0.0-0.8)  | 0.0<br>(0.0-0.0)  | 0.3<br>(0.1-0.7)  | 0.3<br>(0.1-0.7)  | 0.3<br>(0.1-0.7)  | 0.2<br>(0.0-0.7)  | 0.0<br>(0.0-0.0)  |

**Appendix Table 4. HIV mortality data sources used in the GBD 2013.**

| Country                | Source number | Source                                                                                                                                                                                                                            | Surveillance | Verbal Autopsy | Vital Registration |
|------------------------|---------------|-----------------------------------------------------------------------------------------------------------------------------------------------------------------------------------------------------------------------------------|--------------|----------------|--------------------|
| Albania                | 01 - ALB      | World Health Organization (WHO). WHO Mortality Database Version February 2014. Geneva, Switzerland: World Health Organization (WHO), 2014.                                                                                        |              |                | X                  |
| Antigua and Barbuda    | 01 - ATG      | World Health Organization (WHO). WHO Mortality Database Version February 2014. Geneva, Switzerland: World Health Organization (WHO), 2014.                                                                                        |              |                | X                  |
| Argentina              | 01 - ARG      | World Health Organization (WHO). WHO Mortality Database Version February 2014. Geneva, Switzerland: World Health Organization (WHO), 2014.                                                                                        |              |                | X                  |
| Armenia                | 01 - ARM      | World Health Organization (WHO). WHO Mortality Database Version February 2014. Geneva, Switzerland: World Health Organization (WHO), 2014.                                                                                        |              |                | X                  |
| Australia              | 01 - AUS      | World Health Organization (WHO). WHO Mortality Database Version February 2014. Geneva, Switzerland: World Health Organization (WHO), 2014.                                                                                        |              |                | X                  |
| Austria                | 01 - AUT      | World Health Organization (WHO). WHO Mortality Database Version February 2014. Geneva, Switzerland: World Health Organization (WHO), 2014.                                                                                        |              |                | X                  |
| Azerbaijan             | 01 - AZE      | World Health Organization (WHO). WHO Mortality Database Version February 2014. Geneva, Switzerland: World Health Organization (WHO), 2014.                                                                                        |              |                | X                  |
| Bahrain                | 01 - BHR      | World Health Organization (WHO). WHO Mortality Database Version February 2014. Geneva, Switzerland: World Health Organization (WHO), 2014.                                                                                        |              |                | X                  |
| Bangladesh             | 01 - BGD      | INDEPTH, International Centre for Diarrhoeal Disease Research (Bangladesh). Bangladesh - Matlab Health and Demographic Surveillance System. Dhaka, Bangladesh: International Centre for Diarrhoeal Disease Research (Bangladesh). |              | X              |                    |
| Bangladesh             | 02 - BGD      | INDEPTH. Bangladesh - AMK Health and Demographic Surveillance System.                                                                                                                                                             |              | X              |                    |
| Barbados               | 01 - BRB      | World Health Organization (WHO). WHO Mortality Database Version February 2014. Geneva, Switzerland: World Health Organization (WHO), 2014.                                                                                        |              |                | X                  |
| Belarus                | 01 - BLR      | World Health Organization (WHO). WHO Mortality Database Version February 2014. Geneva, Switzerland: World Health Organization (WHO), 2014.                                                                                        |              |                | X                  |
| Belgium                | 01 - BEL      | World Health Organization (WHO). WHO Mortality Database Version February 2014. Geneva, Switzerland: World Health Organization (WHO), 2014.                                                                                        |              |                | X                  |
| Belize                 | 01 - BLZ      | World Health Organization (WHO). WHO Mortality Database Version February 2014. Geneva, Switzerland: World Health Organization (WHO), 2014.                                                                                        |              |                | X                  |
| Bermuda                | 01 - BMU      | World Health Organization (WHO). WHO Mortality Database Version February 2014. Geneva, Switzerland: World Health Organization (WHO), 2014.                                                                                        |              |                | X                  |
| Bolivia                | 01 - BOL      | World Health Organization (WHO). WHO Mortality Database Version February 2014. Geneva, Switzerland: World Health Organization (WHO), 2014.                                                                                        |              |                | X                  |
| Bosnia and Herzegovina | 01 - BIH      | World Health Organization (WHO). WHO Mortality Database Version February 2014. Geneva, Switzerland: World Health Organization (WHO), 2014.                                                                                        |              |                | X                  |
| Brazil                 | 01 - BRA      | World Health Organization (WHO). WHO Mortality Database Version February 2014. Geneva, Switzerland: World Health Organization (WHO), 2014.                                                                                        |              |                | X                  |
| Brunei                 | 01 - BRN      | World Health Organization (WHO). WHO Mortality Database Version February 2014. Geneva, Switzerland: World Health Organization (WHO), 2014.                                                                                        |              |                | X                  |
| Bulgaria               | 01 - BGR      | World Health Organization (WHO). WHO Mortality Database Version February 2014. Geneva, Switzerland: World Health Organization (WHO), 2014.                                                                                        |              |                | X                  |

|              |          |                                                                                                                                                                                                                                                                                                             |   |   |
|--------------|----------|-------------------------------------------------------------------------------------------------------------------------------------------------------------------------------------------------------------------------------------------------------------------------------------------------------------|---|---|
| Burkina Faso | 01 - BFA | Bell JS, Ouédraogo M, Ganaba R, Sombié I, Byass P, Baggaley RF, Filippi V, Fitzmaurice AE, Graham WJ. The epidemiology of pregnancy outcomes in rural Burkina Faso. <i>Trop Med Int Health</i> . 2008; 13 Suppl 1: 31-43.                                                                                   | X |   |
| Burkina Faso | 02 - BFA | INDEPTH, Nouna Health Research Center (Burkina Faso). Burkina Faso - Nouna Health and Demographic Surveillance System.                                                                                                                                                                                      | X |   |
| Burkina Faso | 03 - BFA | Ramroth H, Lorenz E, Rankin JC, Fottrell E, Yé M, Neuhann F, Ssennono M, Sié A, Byass P, Becher H. Causas de la distribución de muerte con el modelo InterVA y la codificación de médicos en un área rural de Burkina Faso. <i>Trop Med Int Health</i> . 2012; 17(7): 904-13.                               | X |   |
| Burkina Faso | 04 - BFA | Würthwein R, Gbangou A, Sauerborn R, Schmidt CM. Measuring the local burden of disease. A study of years of life lost in sub-Saharan Africa. <i>Int J Epidemiol</i> . 2001; 30(3): 501-8.                                                                                                                   | X |   |
| Burkina Faso | 05 - BFA | Yé M, Diboulo E, Niamba L, Sié A, Coulibaly B, Bagagnan C, Dembélé J, Ramroth H. An improved method for physician-certified verbal autopsy reduces the rate of discrepancy: experiences in the Nouna Health and Demographic Surveillance Site (NHDS), Burkina Faso. <i>Popul Health Metr</i> . 2011; 9: 34. | X |   |
| Canada       | 01 - CAN | World Health Organization (WHO). WHO Mortality Database Version February 2014. Geneva, Switzerland: World Health Organization (WHO), 2014.                                                                                                                                                                  |   | X |
| Cape Verde   | 01 - CPV | Wessel H, Reitmaier P, Dupret A, Rocha E, Cnattingius S, Bergström S. Deaths among women of reproductive age in Cape Verde: causes and avoidability. <i>Acta Obstet Gynecol Scand</i> . 1999; 78(3): 225-32.                                                                                                | X |   |
| Chile        | 01 - CHL | Ministry of Health (Chile), National Institute of Statistics (Chile). Chile Vital Registration - Deaths 1985.                                                                                                                                                                                               |   | X |
| Chile        | 02 - CHL | World Health Organization (WHO). WHO Mortality Database Version February 2014. Geneva, Switzerland: World Health Organization (WHO), 2014.                                                                                                                                                                  |   | X |
| China        | 01 - CHN | Chinese Center for Disease Control and Prevention (CCDC). China Disease Surveillance Points 1991 - China CDC.                                                                                                                                                                                               |   | X |
| China        | 02 - CHN | Chinese Center for Disease Control and Prevention (CCDC). China Disease Surveillance Points 1993 - China CDC.                                                                                                                                                                                               |   | X |
| China        | 03 - CHN | Chinese Center for Disease Control and Prevention (CCDC). China Disease Surveillance Points 1994 - China CDC.                                                                                                                                                                                               |   | X |
| China        | 04 - CHN | Chinese Center for Disease Control and Prevention (CCDC). China Disease Surveillance Points 1995 - China CDC.                                                                                                                                                                                               |   | X |
| China        | 05 - CHN | Chinese Center for Disease Control and Prevention (CCDC). China Disease Surveillance Points 1996 - China CDC.                                                                                                                                                                                               |   | X |
| China        | 06 - CHN | Chinese Center for Disease Control and Prevention (CCDC). China Disease Surveillance Points 1997 - China CDC.                                                                                                                                                                                               |   | X |
| China        | 07 - CHN | Chinese Center for Disease Control and Prevention (CCDC). China Disease Surveillance Points 1998 - China CDC.                                                                                                                                                                                               |   | X |
| China        | 08 - CHN | Chinese Center for Disease Control and Prevention (CCDC). China Disease Surveillance Points 1999 - China CDC.                                                                                                                                                                                               |   | X |
| China        | 09 - CHN | Chinese Center for Disease Control and Prevention (CCDC). China Disease Surveillance Points 2000 - China CDC.                                                                                                                                                                                               |   | X |
| China        | 10 - CHN | Chinese Center for Disease Control and Prevention (CCDC). China Disease Surveillance Points 2001 - China CDC.                                                                                                                                                                                               |   | X |
| China        | 11 - CHN | Chinese Center for Disease Control and Prevention (CCDC). China Disease Surveillance Points 2002 - China CDC.                                                                                                                                                                                               |   | X |
| China        | 12 - CHN | Chinese Center for Disease Control and Prevention (CCDC). China Disease Surveillance Points 2004 - China CDC.                                                                                                                                                                                               |   | X |
| China        | 13 - CHN | Chinese Center for Disease Control and Prevention (CCDC). China Disease Surveillance Points 2005 - China CDC.                                                                                                                                                                                               |   | X |
| China        | 14 - CHN | Chinese Center for Disease Control and Prevention (CCDC). China Disease Surveillance Points 2006 - China CDC.                                                                                                                                                                                               |   | X |
| China        | 15 - CHN | Chinese Center for Disease Control and Prevention (CCDC). China Disease Surveillance Points 2007 - China CDC.                                                                                                                                                                                               |   | X |
| China        | 16 - CHN | Chinese Center for Disease Control and Prevention (CCDC). China Disease Surveillance Points 2008 - China CDC.                                                                                                                                                                                               |   | X |
| China        | 17 - CHN | Chinese Center for Disease Control and Prevention (CCDC). China Disease Surveillance Points 2009 - China CDC.                                                                                                                                                                                               |   | X |

|                                  |          |                                                                                                                                                                                      |   |   |   |
|----------------------------------|----------|--------------------------------------------------------------------------------------------------------------------------------------------------------------------------------------|---|---|---|
| China                            | 18 - CHN | Chinese Center for Disease Control and Prevention (CCDC). China Disease Surveillance Points 2010 - China CDC.                                                                        |   |   | X |
| China                            | 19 - CHN | Chinese Center for Disease Control and Prevention (CCDC). China Disease Surveillance Points 2011 - China CDC.                                                                        |   |   | X |
| China                            | 20 - CHN | Chinese Center for Disease Control and Prevention (CCDC). China Notifiable Infectious Diseases 2004.                                                                                 | X |   |   |
| China                            | 21 - CHN | Chinese Center for Disease Control and Prevention (CCDC). China Notifiable Infectious Diseases 2005.                                                                                 | X |   |   |
| China                            | 22 - CHN | Chinese Center for Disease Control and Prevention (CCDC). China Notifiable Infectious Diseases 2006.                                                                                 | X |   |   |
| China                            | 23 - CHN | Chinese Center for Disease Control and Prevention (CCDC). China Notifiable Infectious Diseases 2007.                                                                                 | X |   |   |
| China                            | 24 - CHN | Chinese Center for Disease Control and Prevention (CCDC). China Notifiable Infectious Diseases 2008.                                                                                 | X |   |   |
| China                            | 25 - CHN | Chinese Center for Disease Control and Prevention (CCDC). China Notifiable Infectious Diseases 2009.                                                                                 | X |   |   |
| China                            | 26 - CHN | Chinese Center for Disease Control and Prevention (CCDC). China Notifiable Infectious Diseases 2010.                                                                                 | X |   |   |
| China                            | 27 - CHN | Chinese Center for Disease Control and Prevention (CCDC). China Notifiable Infectious Diseases 2011.                                                                                 | X |   |   |
| China                            | 28 - CHN | Chinese Center for Disease Control and Prevention (CCDC). China Notifiable Infectious Diseases 2012.                                                                                 | X |   |   |
| China                            | 29 - CHN | World Health Organization (WHO). WHO Mortality Database Version February 2014. Geneva, Switzerland: World Health Organization (WHO), 2014.                                           |   |   | X |
| Colombia                         | 01 - COL | National Administrative Department of Statistics (Colombia). Colombia Vital Statistics - Deaths 2008. Bogotá, Colombia: National Administrative Department of Statistics (Colombia). |   |   | X |
| Colombia                         | 02 - COL | World Health Organization (WHO). WHO Mortality Database Version February 2014. Geneva, Switzerland: World Health Organization (WHO), 2014.                                           |   |   | X |
| Costa Rica                       | 01 - CRI | World Health Organization (WHO). WHO Mortality Database Version February 2014. Geneva, Switzerland: World Health Organization (WHO), 2014.                                           |   |   | X |
| Croatia                          | 01 - HRV | World Health Organization (WHO). WHO Mortality Database Version February 2014. Geneva, Switzerland: World Health Organization (WHO), 2014.                                           |   |   | X |
| Cuba                             | 01 - CUB | World Health Organization (WHO). WHO Mortality Database Version February 2014. Geneva, Switzerland: World Health Organization (WHO), 2014.                                           |   |   | X |
| Cyprus                           | 01 - CYP | World Health Organization (WHO). WHO Mortality Database Version February 2014. Geneva, Switzerland: World Health Organization (WHO), 2014.                                           |   |   | X |
| Czech Republic                   | 01 - CZE | World Health Organization (WHO). WHO Mortality Database Version February 2014. Geneva, Switzerland: World Health Organization (WHO), 2014.                                           |   |   | X |
| Democratic Republic of the Congo | 01 - COD | Coghlan B, Brennan RJ, Ngoy P, Dofara D, Otto B, Clements M, Stewart T. Mortality in the Democratic Republic of Congo: a nationwide survey. Lancet. 2006; 367(9504): 44-51.          |   | X |   |
| Denmark                          | 01 - DNK | World Health Organization (WHO). WHO Mortality Database Version February 2014. Geneva, Switzerland: World Health Organization (WHO), 2014.                                           |   |   | X |
| Dominica                         | 01 - DMA | World Health Organization (WHO). WHO Mortality Database Version February 2014. Geneva, Switzerland: World Health Organization (WHO), 2014.                                           |   |   | X |
| Dominican Republic               | 01 - DOM | World Health Organization (WHO). WHO Mortality Database Version February 2014. Geneva, Switzerland: World Health Organization (WHO), 2014.                                           |   |   | X |
| Eastern Cape                     | 01 - ZEC | Department of Home Affairs (South Africa), Statistics South Africa. South Africa Mortality and Causes of Death 1997-2005. Pretoria, South Africa: Statistics South Africa.           |   |   | X |
| Ecuador                          | 01 - ECU | World Health Organization (WHO). WHO Mortality Database Version February 2014. Geneva, Switzerland: World Health Organization (WHO), 2014.                                           |   |   | X |

|             |          |                                                                                                                                                                                                                                                                                                                                  |  |   |   |
|-------------|----------|----------------------------------------------------------------------------------------------------------------------------------------------------------------------------------------------------------------------------------------------------------------------------------------------------------------------------------|--|---|---|
| Egypt       | 01 - EGY | World Health Organization (WHO). WHO Mortality Database Version February 2014. Geneva, Switzerland: World Health Organization (WHO), 2014.                                                                                                                                                                                       |  |   | X |
| El Salvador | 01 - SLV | World Health Organization (WHO). WHO Mortality Database Version February 2014. Geneva, Switzerland: World Health Organization (WHO), 2014.                                                                                                                                                                                       |  |   | X |
| Estonia     | 01 - EST | World Health Organization (WHO). WHO Mortality Database Version February 2014. Geneva, Switzerland: World Health Organization (WHO), 2014.                                                                                                                                                                                       |  |   | X |
| Ethiopia    | 01 - ETH | Anteneh A, Araya T, Misganaw A. Factors associated with place of death in Addis Ababa, Ethiopia. BMC Palliat Care. 2013; 12(14): 14.                                                                                                                                                                                             |  | X |   |
| Ethiopia    | 02 - ETH | Araya T, Tensou B, Davey G, Berhane Y. La vigilancia de entierros detectó una reducción significativa en las muertes relacionadas con el VIH en Addis Ababa, Etiopía. Trop Med Int Health. 2011; 16(12): 1483-9.                                                                                                                 |  | X |   |
| Ethiopia    | 03 - ETH | Deribew A, Tessema F, Girma B. Determinants of under-five mortality in Gilgel Gibe Field Research Center, Southwest Ethiopia. Ethiopian Journal of Health Development. 2007; 21(2): 117-24.                                                                                                                                      |  | X |   |
| Ethiopia    | 04 - ETH | Fantahun M, Fottrell E, Berhane Y, Wall S, Högberg U, Byass P. Assessing a new approach to verbal autopsy interpretation in a rural Ethiopian community: the InterVA model. Bull World Health Organ. 2006; 84(3): 204-10.                                                                                                        |  | X |   |
| Ethiopia    | 05 - ETH | INDEPTH. Ethiopia - Butajira Health and Demographic Surveillance System.                                                                                                                                                                                                                                                         |  | X |   |
| Ethiopia    | 06 - ETH | Lulu K, Berhane Y. The use of simplified verbal autopsy in identifying causes of adult death in a predominantly rural population in Ethiopia. BMC Public Health. 2005; 5: 58.                                                                                                                                                    |  | X |   |
| Ethiopia    | 07 - ETH | Weldearegawi B, Ashebir Y, Gebeye E, Gebregziabihier T, Yohannes M, Mussa S, Berhe H, Abebe Z. Emerging chronic non-communicable diseases in rural communities of Northern Ethiopia: evidence using population-based verbal autopsy method in Kilite Awlaelo surveillance site. Health Policy Plan . 2013. [Epub ahead of print] |  | X |   |
| Fiji        | 01 - FIJ | World Health Organization (WHO). WHO Mortality Database Version February 2014. Geneva, Switzerland: World Health Organization (WHO), 2014.                                                                                                                                                                                       |  |   | X |
| Finland     | 01 - FIN | World Health Organization (WHO). WHO Mortality Database Version February 2014. Geneva, Switzerland: World Health Organization (WHO), 2014.                                                                                                                                                                                       |  |   | X |
| France      | 01 - FRA | World Health Organization (WHO). WHO Mortality Database Version February 2014. Geneva, Switzerland: World Health Organization (WHO), 2014.                                                                                                                                                                                       |  |   | X |
| Free State  | 01 - ZFS | Department of Home Affairs (South Africa), Statistics South Africa. South Africa Mortality and Causes of Death 1997-2005. Pretoria, South Africa: Statistics South Africa.                                                                                                                                                       |  |   | X |
| Gauteng     | 01 - ZGA | Department of Home Affairs (South Africa), Statistics South Africa. South Africa Mortality and Causes of Death 1997-2005. Pretoria, South Africa: Statistics South Africa.                                                                                                                                                       |  |   | X |
| Georgia     | 01 - GEO | World Health Organization (WHO). WHO Mortality Database Version February 2014. Geneva, Switzerland: World Health Organization (WHO), 2014.                                                                                                                                                                                       |  |   | X |
| Germany     | 01 - DEU | World Health Organization (WHO). WHO Mortality Database Version February 2014. Geneva, Switzerland: World Health Organization (WHO), 2014.                                                                                                                                                                                       |  |   | X |
| Ghana       | 01 - GHA | Births and Deaths Registry (Ghana). Ghana - Accra Births and Deaths Registry - Deaths 2000-2007.                                                                                                                                                                                                                                 |  |   | X |
| Ghana       | 02 - GHA | Ghana Statistical Service, Ghana Health Service, Macro International, Inc. Ghana Special Demographic and Health Survey 2007-2008. Calverton, United States: Macro International, Inc., 2010.                                                                                                                                     |  | X |   |

|           |          |                                                                                                                                                                                                                                                                                                                                                     |   |   |
|-----------|----------|-----------------------------------------------------------------------------------------------------------------------------------------------------------------------------------------------------------------------------------------------------------------------------------------------------------------------------------------------------|---|---|
| Ghana     | 03 - GHA | Hurt L, ten Asbroek A, Amenga-Etego S, Zandoh C, Danso S, Edmond K, Hurt C, Tawiah C, Hill Z, Fenty J, Owusu-Agyei S, Campbell OM, Kirkwood BR. Effect of vitamin A supplementation on cause-specific mortality in women of reproductive age in Ghana: a secondary analysis from the ObaapaVitA trial. Bull World Health Organ. 2013; 91(1): 19-27. | X |   |
| Ghana     | 04 - GHA | INDEPTH. Ghana - Navrongo Health and Demographic Surveillance System.                                                                                                                                                                                                                                                                               | X |   |
| Greece    | 01 - GRC | World Health Organization (WHO). WHO Mortality Database Version February 2014. Geneva, Switzerland: World Health Organization (WHO), 2014.                                                                                                                                                                                                          |   | X |
| Grenada   | 01 - GRD | World Health Organization (WHO). WHO Mortality Database Version February 2014. Geneva, Switzerland: World Health Organization (WHO), 2014.                                                                                                                                                                                                          |   | X |
| Guatemala | 01 - GTM | World Health Organization (WHO). WHO Mortality Database Version February 2014. Geneva, Switzerland: World Health Organization (WHO), 2014.                                                                                                                                                                                                          |   | X |
| Guyana    | 01 - GUY | World Health Organization (WHO). WHO Mortality Database Version February 2014. Geneva, Switzerland: World Health Organization (WHO), 2014.                                                                                                                                                                                                          |   | X |
| Haiti     | 01 - HTI | Dowell SF, Davis HL, Holt EA, Ruff AJ, Kissinger PJ, Bijoux J, Boulos R, Boulos C, Halsey NA. The utility of verbal autopsies for identifying HIV-1-related deaths in Haitian children. AIDS. 1993; 7(9): 1255-9.                                                                                                                                   | X |   |
| Haiti     | 02 - HTI | World Health Organization (WHO). WHO Mortality Database Version February 2014. Geneva, Switzerland: World Health Organization (WHO), 2014.                                                                                                                                                                                                          |   | X |
| Honduras  | 01 - HND | World Health Organization (WHO). WHO Mortality Database Version February 2014. Geneva, Switzerland: World Health Organization (WHO), 2014.                                                                                                                                                                                                          |   | X |
| Hungary   | 01 - HUN | World Health Organization (WHO). WHO Mortality Database Version February 2014. Geneva, Switzerland: World Health Organization (WHO), 2014.                                                                                                                                                                                                          |   | X |
| Iceland   | 01 - ISL | World Health Organization (WHO). WHO Mortality Database Version February 2014. Geneva, Switzerland: World Health Organization (WHO), 2014.                                                                                                                                                                                                          |   | X |
| India     | 01 - IND | Byrraju Foundation, Centre for Chronic Disease Control (India), Cooperative for Assistance and Relief Everywhere (CARE), School of Population Health, University of Queensland (Australia). India - Andhra Pradesh Rural Health Initiative.                                                                                                         | X |   |
| India     | 02 - IND | Dongre A, Singh A, Deshmukh P, Garg B. A community based cross sectional study on feasibility of lay interviewers in ascertaining causes of adult deaths by using verbal autopsy in rural Wardha. Online Journal of Health and Allied Sciences. 2008; 7(4): 4.                                                                                      | X |   |
| India     | 03 - IND | Gajalakshmi V, Peto R, Kanaka S, Balasubramanian S. Verbal autopsy of 48 000 adult deaths attributable to medical causes in Chennai (formerly Madras), India. BMC Public Health. 2002; 2: 7.                                                                                                                                                        | X |   |
| India     | 04 - IND | Indian Council of Medical Research (ICMR). India Study on Causes of Death by Verbal Autopsy 2003.                                                                                                                                                                                                                                                   | X |   |
| India     | 05 - IND | Joshi R, Cardona M, Iyengar S, Sukumar A, Raju CR, Raju KR, Raju K, Reddy KS, Lopez A, Neal B. Chronic diseases now a leading cause of death in rural India – mortality data from the Andhra Pradesh Rural Health Initiative. Int J Epidemiol. 2006; 35(6): 1522-9.                                                                                 | X |   |
| India     | 06 - IND | Ministry of Health and Family Welfare (India), Office of the Registrar General and Census Commissioner (India). India Special Survey of Deaths 2004.                                                                                                                                                                                                | X |   |
| India     | 07 - IND | Office of the Registrar General and Census Commissioner (India). India MCCD Vital Statistics - Deaths 1999-2001.                                                                                                                                                                                                                                    |   | X |
| India     | 08 - IND | Office of the Registrar General and Census Commissioner (India). India Medical Certification of Cause of Death Report 2002. New Delhi, India: Office of the Registrar General and Census Commissioner (India), 2009.                                                                                                                                |   | X |



|            |          |                                                                                                                                                                                                                                                                                                             |  |   |   |
|------------|----------|-------------------------------------------------------------------------------------------------------------------------------------------------------------------------------------------------------------------------------------------------------------------------------------------------------------|--|---|---|
| India      | 09 - IND | Office of the Registrar General and Census Commissioner (India). India Medical Certification of Cause of Death Report 2003. New Delhi, India: Office of the Registrar General and Census Commissioner (India), 2009.                                                                                        |  |   | X |
| India      | 10 - IND | Office of the Registrar General and Census Commissioner (India). India Medical Certification of Cause of Death Report 2004. New Delhi, India: Office of the Registrar General and Census Commissioner (India), 2009.                                                                                        |  |   | X |
| India      | 11 - IND | Office of the Registrar General and Census Commissioner (India). India Medical Certification of Cause of Death Report 2005. New Delhi, India: Office of the Registrar General and Census Commissioner (India), 2012.                                                                                        |  |   | X |
| India      | 12 - IND | Office of the Registrar General and Census Commissioner (India). India Medical Certification of Cause of Death Report 2006. New Delhi, India: Office of the Registrar General and Census Commissioner (India), 2012.                                                                                        |  |   | X |
| India      | 13 - IND | Office of the Registrar General and Census Commissioner (India). India Medical Certification of Cause of Death Report 2008. New Delhi, India: Office of the Registrar General and Census Commissioner (India), 2013.                                                                                        |  |   | X |
| Indonesia  | 01 - IDN | National Institute of Health Research and Development (NIHRD), Ministry of Health (Indonesia). Indonesia Sample Registration System 2012, Indonesia Cause of Death Survey 2010-2011, Indonesia Mortality Registration System Strengthening Project (IMRSSP), and Indonesia Basic Health Research 2007-2008. |  | X |   |
| Iran       | 01 - IRN | Ministry of Health and Medical Education (Iran). Iran Vital Registration - Deaths 2007.                                                                                                                                                                                                                     |  |   | X |
| Iran       | 02 - IRN | Ministry of Health and Medical Education (Iran). Iran Vital Registration - Deaths 2008.                                                                                                                                                                                                                     |  |   | X |
| Iran       | 03 - IRN | Ministry of Health and Medical Education (Iran). Iran Vital Registration - Deaths 2009.                                                                                                                                                                                                                     |  |   | X |
| Iran       | 04 - IRN | Ministry of Health and Medical Education (Iran). Iran Vital Registration - Deaths 2010.                                                                                                                                                                                                                     |  |   | X |
| Iraq       | 01 - IRQ | World Health Organization (WHO). WHO Mortality Database Version February 2014. Geneva, Switzerland: World Health Organization (WHO), 2014.                                                                                                                                                                  |  |   | X |
| Ireland    | 01 - IRL | World Health Organization (WHO). WHO Mortality Database Version February 2014. Geneva, Switzerland: World Health Organization (WHO), 2014.                                                                                                                                                                  |  |   | X |
| Israel     | 01 - ISR | World Health Organization (WHO). WHO Mortality Database Version February 2014. Geneva, Switzerland: World Health Organization (WHO), 2014.                                                                                                                                                                  |  |   | X |
| Italy      | 01 - ITA | World Health Organization (WHO). WHO Mortality Database Version February 2014. Geneva, Switzerland: World Health Organization (WHO), 2014.                                                                                                                                                                  |  |   | X |
| Jamaica    | 01 - JAM | World Health Organization (WHO). WHO Mortality Database Version February 2014. Geneva, Switzerland: World Health Organization (WHO), 2014.                                                                                                                                                                  |  |   | X |
| Japan      | 01 - JPN | World Health Organization (WHO). WHO Mortality Database Version February 2014. Geneva, Switzerland: World Health Organization (WHO), 2014.                                                                                                                                                                  |  |   | X |
| Jordan     | 01 - JOR | World Health Organization (WHO). WHO Mortality Database Version February 2014. Geneva, Switzerland: World Health Organization (WHO), 2014.                                                                                                                                                                  |  |   | X |
| Kazakhstan | 01 - KAZ | World Health Organization (WHO). WHO Mortality Database Version February 2014. Geneva, Switzerland: World Health Organization (WHO), 2014.                                                                                                                                                                  |  |   | X |
| Kenya      | 01 - KEN | INDEPTH. Kenya - Kisumu Health and Demographic Surveillance System.                                                                                                                                                                                                                                         |  | X |   |
| Kenya      | 02 - KEN | INDEPTH. Kenya - Nairobi Health and Demographic Surveillance System.                                                                                                                                                                                                                                        |  | X |   |
| Kenya      | 03 - KEN | van Eijk AM, Adazu K, Ofware P, Vulule J, Hamel M, Slutsker L. Causes of deaths using verbal autopsy among adolescents and adults in rural western Kenya. Trop Med Int Health. 2008; 13(10): 1314-24.                                                                                                       |  | X |   |

|               |          |                                                                                                                                                                                                                                                                             |  |   |   |
|---------------|----------|-----------------------------------------------------------------------------------------------------------------------------------------------------------------------------------------------------------------------------------------------------------------------------|--|---|---|
| Kiribati      | 01 - KIR | World Health Organization (WHO). WHO Mortality Database Version February 2014. Geneva, Switzerland: World Health Organization (WHO), 2014.                                                                                                                                  |  |   | X |
| Kuwait        | 01 - KWT | World Health Organization (WHO). WHO Mortality Database Version February 2014. Geneva, Switzerland: World Health Organization (WHO), 2014.                                                                                                                                  |  |   | X |
| KwaZulu-Natal | 01 - ZKN | Department of Home Affairs (South Africa), Statistics South Africa. South Africa Mortality and Causes of Death 1997-2005. Pretoria, South Africa: Statistics South Africa.                                                                                                  |  |   | X |
| Kyrgyzstan    | 01 - KGZ | World Health Organization (WHO). WHO Mortality Database Version February 2014. Geneva, Switzerland: World Health Organization (WHO), 2014.                                                                                                                                  |  |   | X |
| Latvia        | 01 - LVA | World Health Organization (WHO). WHO Mortality Database Version February 2014. Geneva, Switzerland: World Health Organization (WHO), 2014.                                                                                                                                  |  |   | X |
| Limpopo       | 01 - ZLI | Department of Home Affairs (South Africa), Statistics South Africa. South Africa Mortality and Causes of Death 1997-2005. Pretoria, South Africa: Statistics South Africa.                                                                                                  |  |   | X |
| Lithuania     | 01 - LTU | World Health Organization (WHO). WHO Mortality Database Version February 2014. Geneva, Switzerland: World Health Organization (WHO), 2014.                                                                                                                                  |  |   | X |
| Luxembourg    | 01 - LUX | World Health Organization (WHO). WHO Mortality Database Version February 2014. Geneva, Switzerland: World Health Organization (WHO), 2014.                                                                                                                                  |  |   | X |
| Macedonia     | 01 - MKD | World Health Organization (WHO). WHO Mortality Database Version February 2014. Geneva, Switzerland: World Health Organization (WHO), 2014.                                                                                                                                  |  |   | X |
| Malawi        | 01 - MWI | Checchi F, Nyasulu P, Chandramohan D, Roberts B. Rates and causes of death in Chiradzulu District, Malawi, 2008: a key informant study. Trop Med Int Health. 2011; 16(3): 375-8.                                                                                            |  | X |   |
| Malawi        | 02 - MWI | Chihana M, Floyd S, Molesworth A, Crampin AC, Kayuni N, Price A, Zaba B, Jahn A, Mvula H, Dube A, Ngwira B, Glynn JR, French N. Adult mortality and probable cause of death in rural northern Malawi in the era of HIV treatment. Trop Med Int Health. 2012; 17(8): E74-83. |  | X |   |
| Malawi        | 03 - MWI | Doctor HV, Weinreb AA. Estimation of AIDS adult mortality by verbal autopsy in rural Malawi. AIDS. 2003; 17(17): 2509-13.                                                                                                                                                   |  | X |   |
| Malawi        | 04 - MWI | Jahn A, Floyd S, Crampin AC, Mvula H, Mwinuka V, Mwaiyeghele E, McGrath N, Zaba B, Fine PEM, Glynn JR. Declining child mortality in northern Malawi despite high rates of infection with HIV. Bull World Health Organ. 2010; 88: 746-53.                                    |  | X |   |
| Malaysia      | 01 - MYS | World Health Organization (WHO). WHO Mortality Database Version February 2014. Geneva, Switzerland: World Health Organization (WHO), 2014.                                                                                                                                  |  |   | X |
| Maldives      | 01 - MDV | World Health Organization (WHO). WHO Mortality Database Version February 2014. Geneva, Switzerland: World Health Organization (WHO), 2014.                                                                                                                                  |  |   | X |
| Malta         | 01 - MLT | World Health Organization (WHO). WHO Mortality Database Version February 2014. Geneva, Switzerland: World Health Organization (WHO), 2014.                                                                                                                                  |  |   | X |
| Mauritius     | 01 - MUS | World Health Organization (WHO). WHO Mortality Database Version February 2014. Geneva, Switzerland: World Health Organization (WHO), 2014.                                                                                                                                  |  |   | X |
| Mexico        | 01 - MEX | Ministry of Health (Mexico), National Institute of Statistics and Geography (Mexico). Mexico Vital Registration - Deaths 1980 .                                                                                                                                             |  |   | X |
| Mexico        | 02 - MEX | Ministry of Health (Mexico), National Institute of Statistics and Geography (Mexico). Mexico Vital Registration - Deaths 1981 .                                                                                                                                             |  |   | X |
| Mexico        | 03 - MEX | Ministry of Health (Mexico), National Institute of Statistics and Geography (Mexico). Mexico Vital Registration - Deaths 1982.                                                                                                                                              |  |   | X |
| Mexico        | 04 - MEX | Ministry of Health (Mexico), National Institute of Statistics and Geography (Mexico). Mexico Vital Registration - Deaths 1983.                                                                                                                                              |  |   | X |
| Mexico        | 05 - MEX | Ministry of Health (Mexico), National Institute of Statistics and Geography (Mexico). Mexico Vital Registration - Deaths 1984.                                                                                                                                              |  |   | X |
| Mexico        | 06 - MEX | Ministry of Health (Mexico), National Institute of Statistics and Geography (Mexico). Mexico Vital Registration - Deaths 1985.                                                                                                                                              |  |   | X |



|                  |          |                                                                                                                                                                                                                                                                                                                                             |  |   |   |
|------------------|----------|---------------------------------------------------------------------------------------------------------------------------------------------------------------------------------------------------------------------------------------------------------------------------------------------------------------------------------------------|--|---|---|
| Morocco          | 01 - MAR | World Health Organization (WHO). WHO Mortality Database Version February 2014. Geneva, Switzerland: World Health Organization (WHO), 2014.                                                                                                                                                                                                  |  |   | X |
| Mozambique       | 01 - MOZ | Centers for Disease Control and Prevention (CDC), MEASURE Evaluation Project, Carolina Population Center, University of North Carolina, Ministry of Health (Mozambique), National Statistics Institute (Mozambique), US Census Bureau. Mozambique National Survey on the Causes of Death 2007-2008.                                         |  | X |   |
| Mozambique       | 02 - MOZ | INDEPTH. Mozambique - Manhiça Health and Demographic Surveillance System.                                                                                                                                                                                                                                                                   |  | X |   |
| Mozambique       | 03 - MOZ | Sacarlal J, Nhacolo AQ, Sigaúque B, Nhalungo DA, Abacassamo F, Sacoor CN, Aide P, Machevo S, Nhampossa T, Macete EV, Bassat Q, David C, Bardají A, Letang E, Saúte F, Aponte JJ, Thompson R, Alonso PL. A 10 year study of the cause of death in children under 15 years in Manhiça, Mozambique. BioMed Central Public Health. 2009; 9: 67. |  | X |   |
| Mpumalanga       | 01 - ZMP | Department of Home Affairs (South Africa), Statistics South Africa. South Africa Mortality and Causes of Death 1997-2005. Pretoria, South Africa: Statistics South Africa.                                                                                                                                                                  |  |   | X |
| Myanmar          | 01 - MMR | Myint, S. Cause of death verification study in Myanmar. Presentation at: World Health Organization Regional Office for South East Asia. Regional Consultation on Mortality Statistics. 2007; New Delhi, India.                                                                                                                              |  | X |   |
| Netherlands      | 01 - NLD | World Health Organization (WHO). WHO Mortality Database Version February 2014. Geneva, Switzerland: World Health Organization (WHO), 2014.                                                                                                                                                                                                  |  |   | X |
| New Zealand      | 01 - NZL | World Health Organization (WHO). WHO Mortality Database Version February 2014. Geneva, Switzerland: World Health Organization (WHO), 2014.                                                                                                                                                                                                  |  |   | X |
| Nicaragua        | 01 - NIC | World Health Organization (WHO). WHO Mortality Database Version February 2014. Geneva, Switzerland: World Health Organization (WHO), 2014.                                                                                                                                                                                                  |  |   | X |
| Nigeria          | 01 - NGA | National Population Commission of Nigeria, United Nations Children's Fund (UNICEF). Nigeria Report of Livebirths, Deaths and Stillbirths 1994-2007. Abuja, Nigeria: National Population Commission of Nigeria, 2008.                                                                                                                        |  |   | X |
| North-West       | 01 - ZNW | Department of Home Affairs (South Africa), Statistics South Africa. South Africa Mortality and Causes of Death 1997-2005. Pretoria, South Africa: Statistics South Africa.                                                                                                                                                                  |  |   | X |
| Northern Cape    | 01 - ZNC | Department of Home Affairs (South Africa), Statistics South Africa. South Africa Mortality and Causes of Death 1997-2005. Pretoria, South Africa: Statistics South Africa.                                                                                                                                                                  |  |   | X |
| Norway           | 01 - NOR | World Health Organization (WHO). WHO Mortality Database Version February 2014. Geneva, Switzerland: World Health Organization (WHO), 2014.                                                                                                                                                                                                  |  |   | X |
| Oman             | 01 - OMN | World Health Organization (WHO). WHO Mortality Database Version February 2014. Geneva, Switzerland: World Health Organization (WHO), 2014.                                                                                                                                                                                                  |  |   | X |
| Pakistan         | 01 - PAK | National Institute of Population Studies (NIPS) (Pakistan), Macro International, Inc. Pakistan Demographic and Health Survey 2006-2007. Calverton, United States: Macro International, Inc.                                                                                                                                                 |  | X |   |
| Palestine        | 01 - PSE | World Health Organization (WHO). WHO Mortality Database Version February 2014. Geneva, Switzerland: World Health Organization (WHO), 2014.                                                                                                                                                                                                  |  |   | X |
| Panama           | 01 - PAN | World Health Organization (WHO). WHO Mortality Database Version February 2014. Geneva, Switzerland: World Health Organization (WHO), 2014.                                                                                                                                                                                                  |  |   | X |
| Papua New Guinea | 01 - PNG | World Health Organization (WHO). WHO Mortality Database Version February 2014. Geneva, Switzerland: World Health Organization (WHO), 2014.                                                                                                                                                                                                  |  |   | X |
| Paraguay         | 01 - PRY | World Health Organization (WHO). WHO Mortality Database Version February 2014. Geneva, Switzerland: World Health Organization (WHO), 2014.                                                                                                                                                                                                  |  |   | X |

|                                  |          |                                                                                                                                                                                                                         |  |   |   |
|----------------------------------|----------|-------------------------------------------------------------------------------------------------------------------------------------------------------------------------------------------------------------------------|--|---|---|
| Peru                             | 01 - PER | World Health Organization (WHO). WHO Mortality Database Version February 2014. Geneva, Switzerland: World Health Organization (WHO), 2014.                                                                              |  |   | X |
| Philippines                      | 01 - PHL | World Health Organization (WHO). WHO Mortality Database Version February 2014. Geneva, Switzerland: World Health Organization (WHO), 2014.                                                                              |  |   | X |
| Poland                           | 01 - POL | World Health Organization (WHO). WHO Mortality Database Version February 2014. Geneva, Switzerland: World Health Organization (WHO), 2014.                                                                              |  |   | X |
| Portugal                         | 01 - PRT | World Health Organization (WHO). WHO Mortality Database Version February 2014. Geneva, Switzerland: World Health Organization (WHO), 2014.                                                                              |  |   | X |
| Puerto Rico                      | 01 - PRI | World Health Organization (WHO). WHO Mortality Database Version February 2014. Geneva, Switzerland: World Health Organization (WHO), 2014.                                                                              |  |   | X |
| Qatar                            | 01 - QAT | General Secretariat for Development Planning (Qatar), Ministry of Public Health (Qatar). Qatar Vital Statistics Annual Bulletin 2000. 2001.                                                                             |  |   | X |
| Qatar                            | 02 - QAT | General Secretariat for Development Planning (Qatar), Ministry of Public Health (Qatar). Qatar Vital Statistics Annual Bulletin 2001. 2002.                                                                             |  |   | X |
| Qatar                            | 03 - QAT | General Secretariat for Development Planning (Qatar), Ministry of Public Health (Qatar). Qatar Vital Statistics Annual Bulletin 2002. 2003.                                                                             |  |   | X |
| Qatar                            | 04 - QAT | General Secretariat for Development Planning (Qatar), Ministry of Public Health (Qatar). Qatar Vital Statistics Annual Bulletin 2003. 2004.                                                                             |  |   | X |
| Qatar                            | 05 - QAT | General Secretariat for Development Planning (Qatar), National Health Authority (Qatar). Qatar Vital Statistics Annual Bulletin 2005. 2006.                                                                             |  |   | X |
| Qatar                            | 06 - QAT | National Health Authority (Qatar), Qatar Statistics Authority. Qatar Vital Statistics Annual Bulletin 2006. 2007.                                                                                                       |  |   | X |
| Qatar                            | 07 - QAT | National Health Authority (Qatar), Qatar Statistics Authority. Qatar Vital Statistics Annual Bulletin 2008. 2009.                                                                                                       |  |   | X |
| Qatar                            | 08 - QAT | World Health Organization (WHO). WHO Mortality Database Version February 2014. Geneva, Switzerland: World Health Organization (WHO), 2014.                                                                              |  |   | X |
| Romania                          | 01 - ROU | World Health Organization (WHO). WHO Mortality Database Version February 2014. Geneva, Switzerland: World Health Organization (WHO), 2014.                                                                              |  |   | X |
| Russia                           | 01 - RUS | Center for Demographic Research, New Economic School (Russia). Russia Mortality Rates by Region, Age, Sex, and Cause of Death 1989-1998. Moscow, Russia: Center for Demographic Research, New Economic School (Russia). |  |   | X |
| Russia                           | 02 - RUS | World Health Organization (WHO). WHO Mortality Database Version February 2014. Geneva, Switzerland: World Health Organization (WHO), 2014.                                                                              |  |   | X |
| Saint Lucia                      | 01 - LCA | World Health Organization (WHO). WHO Mortality Database Version February 2014. Geneva, Switzerland: World Health Organization (WHO), 2014.                                                                              |  |   | X |
| Saint Vincent and the Grenadines | 01 - VCT | World Health Organization (WHO). WHO Mortality Database Version February 2014. Geneva, Switzerland: World Health Organization (WHO), 2014.                                                                              |  |   | X |
| Sao Tome and Principe            | 01 - STP | World Health Organization (WHO). WHO Mortality Database Version February 2014. Geneva, Switzerland: World Health Organization (WHO), 2014.                                                                              |  |   | X |
| Senegal                          | 01 - SEN | Duthe G, Pison G. Adult mortality in a rural area of Senegal: Non-communicable diseases have a large impact in Mlomp. Demographic Research. 2008; 19(37): 1419-48.                                                      |  | X |   |
| Serbia                           | 01 - SRB | World Health Organization (WHO). WHO Mortality Database Version February 2014. Geneva, Switzerland: World Health Organization (WHO), 2014.                                                                              |  |   | X |
| Seychelles                       | 01 - SYC | World Health Organization (WHO). WHO Mortality Database Version February 2014. Geneva, Switzerland: World Health Organization (WHO), 2014.                                                                              |  |   | X |

|              |          |                                                                                                                                                                                               |   |  |   |
|--------------|----------|-----------------------------------------------------------------------------------------------------------------------------------------------------------------------------------------------|---|--|---|
| Singapore    | 01 - SGP | World Health Organization (WHO). WHO Mortality Database Version February 2014. Geneva, Switzerland: World Health Organization (WHO), 2014.                                                    |   |  | X |
| Slovakia     | 01 - SVK | World Health Organization (WHO). WHO Mortality Database Version February 2014. Geneva, Switzerland: World Health Organization (WHO), 2014.                                                    |   |  | X |
| Slovenia     | 01 - SVN | World Health Organization (WHO). WHO Mortality Database Version February 2014. Geneva, Switzerland: World Health Organization (WHO), 2014.                                                    |   |  | X |
| South Africa | 01 - ZAF | Garrib A, Jaffar S, Knight S, Bradshaw D, Bennish ML. Rates and causes of child mortality in an area of high HIV prevalence in rural South Africa. Trop Med Int Health. 2006; 11(12): 1841-8. | X |  |   |
| South Africa | 02 - ZAF | MRC/Wits Rural Public Health and Health Transitions Research Unit (Agincourt), INDEPTH. South Africa - Agincourt Health and Socio-Demographic Surveillance System.                            | X |  |   |
| South Africa | 03 - ZAF | Muhwava W. Contributions of the Africa Centre Demographic Surveillance to the Community. Umbiko . 2007; 12. 3-4.                                                                              | X |  |   |
| South Africa | 04 - ZAF | World Health Organization (WHO). WHO Mortality Database Version February 2014. Geneva, Switzerland: World Health Organization (WHO), 2014.                                                    |   |  | X |
| South Korea  | 01 - KOR | World Health Organization (WHO). WHO Mortality Database Version February 2014. Geneva, Switzerland: World Health Organization (WHO), 2014.                                                    |   |  | X |
| Spain        | 01 - ESP | World Health Organization (WHO). WHO Mortality Database Version February 2014. Geneva, Switzerland: World Health Organization (WHO), 2014.                                                    |   |  | X |
| Sri Lanka    | 01 - LKA | World Health Organization (WHO). WHO Mortality Database Version February 2014. Geneva, Switzerland: World Health Organization (WHO), 2014.                                                    |   |  | X |
| Suriname     | 01 - SUR | World Health Organization (WHO). WHO Mortality Database Version February 2014. Geneva, Switzerland: World Health Organization (WHO), 2014.                                                    |   |  | X |
| Sweden       | 01 - SWE | World Health Organization (WHO). WHO Mortality Database Version February 2014. Geneva, Switzerland: World Health Organization (WHO), 2014.                                                    |   |  | X |
| Switzerland  | 01 - CHE | World Health Organization (WHO). WHO Mortality Database Version February 2014. Geneva, Switzerland: World Health Organization (WHO), 2014.                                                    |   |  | X |
| Syria        | 01 - SYR | World Health Organization (WHO). WHO Mortality Database Version February 2014. Geneva, Switzerland: World Health Organization (WHO), 2014.                                                    |   |  | X |
| Taiwan       | 01 - TWN | Department of Health (Taiwan). Taiwan Statistics of Causes of Death 2008.                                                                                                                     |   |  | X |
| Taiwan       | 02 - TWN | Department of Health (Taiwan). Taiwan Statistics of Causes of Death 2009.                                                                                                                     |   |  | X |
| Taiwan       | 03 - TWN | Department of Health (Taiwan). Taiwan Statistics of Causes of Death 2010.                                                                                                                     |   |  | X |
| Taiwan       | 04 - TWN | Department of Health (Taiwan). Taiwan Statistics of Causes of Death 2011.                                                                                                                     |   |  | X |
| Taiwan       | 05 - TWN | Department of Health (Taiwan). Taiwan Statistics of Causes of Death 2012.                                                                                                                     |   |  | X |
| Taiwan       | 06 - TWN | Department of Health (Taiwan). Taiwan Vital Statistics - Deaths 2007.                                                                                                                         |   |  | X |
| Tajikistan   | 01 - TJK | World Health Organization (WHO). WHO Mortality Database Version February 2014. Geneva, Switzerland: World Health Organization (WHO), 2014.                                                    |   |  | X |
| Tanzania     | 01 - TZA | INDEPTH. Tanzania - Ifakara Health and Demographic Surveillance System.                                                                                                                       | X |  |   |
| Tanzania     | 02 - TZA | INDEPTH. Tanzania - Rufiji Health and Demographic Surveillance System.                                                                                                                        | X |  |   |

|                     |          |                                                                                                                                                                                                                                                                                                   |   |   |   |
|---------------------|----------|---------------------------------------------------------------------------------------------------------------------------------------------------------------------------------------------------------------------------------------------------------------------------------------------------|---|---|---|
| Tanzania            | 03 - TZA | Illah E, Mbaruku G, Masanja H, Kahn K. Causes and risk factors for maternal mortality in rural Tanzania--case of Rufiji Health and Demographic Surveillance Site (HDSS). <i>Afr J Reprod Health</i> . 2013; 17(3): 119-30.                                                                        | X |   |   |
| Tanzania            | 04 - TZA | Kaatano GM, Mashauri FM, Kinung'hi SM, Mwanga JR, Malima RC, Kishamawe C, Nnko SE, Magesa SM, Mboera LE. Patterns of malaria related mortality based on verbal autopsy in Muleba District, north-western Tanzania. <i>Tanzan J Health Res</i> . 2009; 11(4): 210-8.                               |   | X |   |
| Tanzania            | 05 - TZA | MacLeod J, Rhode R. Retrospective follow-up of maternal deaths and their associated risk factors in a rural district of Tanzania. <i>Trop Med Int Health</i> . 1998; 3(2): 130-7.                                                                                                                 |   | X |   |
| Tanzania            | 06 - TZA | Ministry of Health and Social Welfare (Tanzania), Newcastle University, UK Department for International Development (DFID). <i>Tanzania Policy Implications of Mortality Burden 1995-2001</i> .                                                                                                   |   | X |   |
| Tanzania            | 07 - TZA | Narah-Bana, S. Risk Factors and Causes of Adult Deaths in the Ifakara Health and Demographic Surveillance System Population, 2003-2007 [dissertation]. [Johannesburg, South Africa]: University of the Witwatersrand; 2010. 174 p.                                                                |   | X |   |
| Tanzania            | 08 - TZA | Narh-Bana SA, Chirwa TF, Mwanyangala MA, Nathan R. Muertes de adultos y el futuro: Un análisis causa-especifico de las muertes de adultos de un estudio longitudinal en Tanzania rural 2003-2007. <i>Trop Med Int Health</i> . 2012; 17(11): 1396-404.                                            |   | X |   |
| Tanzania            | 09 - TZA | Sangher-Dery MD. The Role of Birth Order in Infant Mortality in Ifakara DSS Area in Rural Tanzania [master's thesis]. [Johannesburg, South Africa]: University of the Witwatersrand; 2009.                                                                                                        |   | X |   |
| Thailand            | 01 - THA | Ministry of Public Health (Thailand). <i>Thailand Burden of Disease and Injuries 1998-1999</i> .                                                                                                                                                                                                  |   | X |   |
| Thailand            | 02 - THA | World Health Organization (WHO). WHO Mortality Database Version February 2014. Geneva, Switzerland: World Health Organization (WHO), 2014.                                                                                                                                                        |   |   | X |
| The Bahamas         | 01 - BHS | World Health Organization (WHO). WHO Mortality Database Version February 2014. Geneva, Switzerland: World Health Organization (WHO), 2014.                                                                                                                                                        |   |   | X |
| Trinidad and Tobago | 01 - TTO | World Health Organization (WHO). WHO Mortality Database Version February 2014. Geneva, Switzerland: World Health Organization (WHO), 2014.                                                                                                                                                        |   |   | X |
| Turkey              | 01 - TUR | Baskent University, Ministry of Health (Turkey), State Institute of Statistics (Turkey). <i>Turkey Verbal Autopsy Survey 2003</i> .                                                                                                                                                               |   | X |   |
| Turkey              | 02 - TUR | Turkish Statistical Institute. <i>Turkey Causes of Death Statistics 2010-2012</i> . Ankara, Turkey: Turkish Statistical Institute.                                                                                                                                                                |   |   | X |
| Turkmenistan        | 01 - TKM | World Health Organization (WHO). WHO Mortality Database Version February 2014. Geneva, Switzerland: World Health Organization (WHO), 2014.                                                                                                                                                        |   |   | X |
| Uganda              | 01 - UGA | MEASURE Evaluation Project, Carolina Population Center, University of North Carolina, Macro International, Inc, Uganda Bureau of Statistics. <i>Uganda Child Verbal Autopsy Study 2007</i> . Macro International, Inc.                                                                            |   | X |   |
| Uganda              | 02 - UGA | Mayanja BN, Baisley K, Nalweyiso N, Kibengo FM, Mugisha JO, Van der Paal L, Maher D, Kaleebu P. Using verbal autopsy to assess the prevalence of HIV infection among deaths in the ART period in rural Uganda: a prospective cohort study, 2006-2008. <i>Popul Health Metr</i> . 2011; 9(36): 36. |   | X |   |
| Ukraine             | 01 - UKR | World Health Organization (WHO). WHO Mortality Database Version February 2014. Geneva, Switzerland: World Health Organization (WHO), 2014.                                                                                                                                                        |   |   | X |
| United Kingdom      | 01 - GBR | National Records of Scotland. <i>United Kingdom - Scotland Vital Events Reference Tables 2011</i> . Edinburgh, Scotland: National Records of Scotland.                                                                                                                                            |   |   | X |
| United Kingdom      | 02 - GBR | National Records of Scotland. <i>United Kingdom - Scotland Vital Events Reference Tables 2012</i> . Edinburgh, Scotland: National Records of Scotland.                                                                                                                                            |   |   | X |

|                |          |                                                                                                                                                                                                                                                                                                                           |  |   |   |
|----------------|----------|---------------------------------------------------------------------------------------------------------------------------------------------------------------------------------------------------------------------------------------------------------------------------------------------------------------------------|--|---|---|
| United Kingdom | 03 - GBR | Northern Ireland Statistics and Research Agency (NISRA). United Kingdom - Northern Ireland Registrar General Annual Report 2011. Belfast, Northern Ireland Northern Ireland Statistics and Research Agency (NISRA), 2012.                                                                                                 |  |   | X |
| United Kingdom | 04 - GBR | Office for National Statistics (United Kingdom). United Kingdom - England and Wales Mortality Data 1981-1994. Newport, United Kingdom: Office for National Statistics (United Kingdom).                                                                                                                                   |  |   | X |
| United Kingdom | 05 - GBR | Office for National Statistics (United Kingdom). United Kingdom - England and Wales Mortality Data 1995-2000. Newport, United Kingdom: Office for National Statistics (United Kingdom).                                                                                                                                   |  |   | X |
| United Kingdom | 06 - GBR | Office for National Statistics (United Kingdom). United Kingdom - England and Wales Mortality Data 2001-2012. Newport, United Kingdom: Office for National Statistics (United Kingdom).                                                                                                                                   |  |   | X |
| United Kingdom | 07 - GBR | World Health Organization (WHO). WHO Mortality Database Version February 2014. Geneva, Switzerland: World Health Organization (WHO), 2014.                                                                                                                                                                                |  |   | X |
| United States  | 01 - USA | World Health Organization (WHO). WHO Mortality Database Version February 2014. Geneva, Switzerland: World Health Organization (WHO), 2014.                                                                                                                                                                                |  |   | X |
| Uruguay        | 01 - URY | World Health Organization (WHO). WHO Mortality Database Version February 2014. Geneva, Switzerland: World Health Organization (WHO), 2014.                                                                                                                                                                                |  |   | X |
| Uzbekistan     | 01 - UZB | World Health Organization (WHO). WHO Mortality Database Version February 2014. Geneva, Switzerland: World Health Organization (WHO), 2014.                                                                                                                                                                                |  |   | X |
| Venezuela      | 01 - VEN | World Health Organization (WHO). WHO Mortality Database Version February 2014. Geneva, Switzerland: World Health Organization (WHO), 2014.                                                                                                                                                                                |  |   | X |
| Vietnam        | 01 - VNM | Hanoi School of Public Health, Ministry of Health (Viet Nam), School of Population Health, University of Queensland (Australia). Vietnam Burden of Disease and Injury Study 2008. Hanoi, Vietnam: Hanoi School of Public Health, 2011.                                                                                    |  | X |   |
| Vietnam        | 02 - VNM | Hoa NP, Rao C, Hoy DG, Hinh ND, Chuc NT, Ngo DA. Mortality measures from sample-based surveillance: evidence of the epidemiological transition in Viet Nam. Bull World Health Organ. 2012; 90(10): 764-72.                                                                                                                |  | X |   |
| Vietnam        | 03 - VNM | Ngo AD, Rao C, Hoa NP, Adair T, Chuc NTK. Mortality patterns in Vietnam, 2006: Findings from a national verbal autopsy survey. BMC Res Notes. 2010; 3: 78.                                                                                                                                                                |  | X |   |
| Vietnam        | 04 - VNM | Quyen BTT, Nhung NT, Cuong PV. The causes of deaths in Chililab between 2008-2010 based on verbal autopsy method. Vietnam Journal of Public Health. 2012; 1(1): 24-31.                                                                                                                                                    |  | X |   |
| Western Cape   | 01 - ZWC | Department of Home Affairs (South Africa), Statistics South Africa. South Africa Mortality and Causes of Death 1997-2005. Pretoria, South Africa: Statistics South Africa.                                                                                                                                                |  |   | X |
| Zambia         | 01 - ZMB | Mudenda SS, Kamocha S, Mswia R, Conkling M, Sikanyiti P, Potter D, Mayaka WC, Marx MA. Feasibility of using a WHO-standard methodology for Sample Vital Registration with Verbal Autopsy (SAVVY) to report leading causes of death in Zambia: results of a pilot in four provinces, 2010. Popul Health Metr. 2011; 9: 40. |  | X |   |
| Zimbabwe       | 01 - ZWE | Registrar General's Department (Zimbabwe), Zimbabwe National Statistics Agency. Zimbabwe Mortality Report 2007.                                                                                                                                                                                                           |  |   | X |
| Zimbabwe       | 02 - ZWE | World Health Organization (WHO). WHO Mortality Database Version February 2014. Geneva, Switzerland: World Health Organization (WHO), 2014.                                                                                                                                                                                |  |   | X |



**Appendix Table 5: Covariates used in CODEm for tuberculosis - Males and Females**

| Covariate                                                                                             | Direction | Level |
|-------------------------------------------------------------------------------------------------------|-----------|-------|
| Cumulative Cigarettes (5 years)                                                                       | 1         | 1     |
| Diabetes Fasting Plasma Glucose (mmol/L)                                                              | 1         | 1     |
| Health system access (unitless)                                                                       | -1        | 1     |
| Indoor Air Pollution (All Cooking Fuels)                                                              | 1         | 1     |
| Malnutrition in children under 5 years - proportion > 2SD below mean weight for age (logit transform) | -1        | 1     |
| Smoking Prevalence                                                                                    | 1         | 1     |
| Alcohol (liters per capita)                                                                           | 1         | 2     |
| Population Density (500-1,000 ppl/sqkm, proportion)                                                   | 1         | 2     |
| Population Density (over 1,000 ppl/sqkm, proportion)                                                  | 1         | 2     |
| Education (years per capita)                                                                          | -1        | 3     |
| Lag distributed income per capita (log transformed)                                                   | -1        | 3     |

**Appendix Table 6a: CODEm sub-model performance for tuberculosis - Males**

| Overall Rank | Model type | Dependent variable | Covariates                                                                                                                                                                                                                                                                         | Root Mean Squared Error |      | Trend Test |      | Draws |
|--------------|------------|--------------------|------------------------------------------------------------------------------------------------------------------------------------------------------------------------------------------------------------------------------------------------------------------------------------|-------------------------|------|------------|------|-------|
|              |            |                    |                                                                                                                                                                                                                                                                                    | Test 1                  | Rank | Test 1     | Rank |       |
| 1            | Spacetime  | Logit(CF)          | Malnutrition - poroportion <2SD weight for age (logit transformed), Smoking Prevalence, Alcohol (liters per capita), Education (years per capita), Lag distributed income per capita (log transformed)                                                                             | 0.5960541               | 2    | 0.1723921  | 52   | 99    |
| 2            | Spacetime  | Logit(CF)          | Malnutrition - poroportion <2SD weight for age (logit transformed), Indoor Air Pollution (All Cooking Fuels), Smoking Prevalence, Alcohol (liters per capita), Education (years per capita)                                                                                        | 0.6105738               | 12   | 0.1722745  | 43   | 89    |
| 3            | Spacetime  | Logit(CF)          | Malnutrition - poroportion <2SD weight for age (logit transformed), Smoking Prevalence, Education (years per capita), Lag distributed income per capita (log transformed)                                                                                                          | 0.6089908               | 9    | 0.172358   | 48   | 80    |
| 4            | Spacetime  | Logit(CF)          | Health System Access 2 (unitness), Malnutrition - proportion <2SD weight for age (logit transformed), Indoor Air Pollution (All Cooking Fuels), Smoking Prevalence, Alcohol (liters per capita), Education (years per capita), Lag distributed income per capita (log transformed) | 0.602951                | 4    | 0.1724631  | 61   | 72    |
| 5            | Spacetime  | Logit(CF)          | Malnutrition - poroportion <2SD weight for age (logit transformed), Alcohol (liters per capita), Education (years per capita), Lag distributed income per capita (log transformed)                                                                                                 | 0.6050448               | 6    | 0.1724786  | 63   | 65    |
| 6            | Spacetime  | Logit(CF)          | Malnutrition - poroportion <2SD weight for age (logit transformed), Indoor Air Pollution (All Cooking Fuels), Smoking Prevalence, Education (years per capita)                                                                                                                     | 0.6211647               | 29   | 0.1722964  | 46   | 59    |
| 7            | Spacetime  | Logit(CF)          | Health System Access 2 (unitness), Malnutrition - proportion <2SD weight for age (logit transformed), Indoor Air Pollution (All Cooking Fuels), Smoking Prevalence, Education (years per capita), Lag distributed income per capita (log transformed)                              | 0.6115596               | 14   | 0.1724719  | 62   | 53    |
| 8            | Spacetime  | Logit(CF)          | Health System Access 2 (unitness), Malnutrition - proportion <2SD weight for age (logit transformed), Smoking Prevalence, Alcohol (liters per capita), Education (years per capita), Lag distributed income per capita (log transformed)                                           | 0.5957156               | 1    | 0.1726189  | 78   | 48    |
| 9            | Spacetime  | Logit(CF)          | Malnutrition - poroportion <2SD weight for age (logit transformed), Indoor Air Pollution (All Cooking Fuels), Alcohol (liters per capita), Education (years per capita)                                                                                                            | 0.6215445               | 31   | 0.1723753  | 49   | 43    |
| 10           | Spacetime  | Logit(CF)          | Health System Access 2 (unitness), Malnutrition - proportion <2SD weight for age (logit transformed), Smoking Prevalence, Education (years per capita), Lag distributed income per capita (log transformed)                                                                        | 0.6069267               | 7    | 0.1725958  | 73   | 39    |
| 11           | Spacetime  | Logit(CF)          | Health System Access 2 (unitness), Malnutrition - proportion <2SD weight for age (logit transformed), Indoor Air Pollution (All Cooking Fuels), Alcohol (liters per capita), Education (years per capita), Lag distributed income per capita (log transformed)                     | 0.6102294               | 10   | 0.1726066  | 75   | 35    |
| 12           | Spacetime  | Logit(CF)          | Malnutrition - poroportion <2SD weight for age (logit transformed), Indoor Air Pollution (All Cooking Fuels), Smoking Prevalence                                                                                                                                                   | 0.6211144               | 28   | 0.1724322  | 57   | 31    |

|    |           |           |                                                                                                                                                                                                                                                                                     |           |    |           |    |    |
|----|-----------|-----------|-------------------------------------------------------------------------------------------------------------------------------------------------------------------------------------------------------------------------------------------------------------------------------------|-----------|----|-----------|----|----|
| 13 | Spacetime | Logit(CF) | Malnutrition - poroportion <2SD weight for age (logit transformed), Indoor Air Polluntion (All Cooking Fuels), Smoking Prevalence, Alcohol (liters per capita)                                                                                                                      | 0.6232108 | 35 | 0.1723788 | 51 | 28 |
| 14 | Spacetime | Logit(CF) | Malnutrition - poroportion <2SD weight for age (logit transformed), Indoor Air Polluntion (All Cooking Fuels), Smoking Prevalence, Lag distributed income per capita (log transformed)                                                                                              | 0.6215823 | 32 | 0.172421  | 55 | 26 |
| 15 | Spacetime | Logit(CF) | Health System Access 2 (unitness), Malnutrition - proportion <2SD weight for age (logit transformed), Alcohol (liters per capita), Education (years per capita), Lag distributed income per capita (log transformed)                                                                | 0.6021707 | 3  | 0.1727518 | 85 | 23 |
| 16 | Spacetime | Logit(CF) | Malnutrition - poroportion <2SD weight for age (logit transformed), Indoor Air Polluntion (All Cooking Fuels), Smoking Prevalence, Alcohol (liters per capita), Lag distributed income per capita (log transformed)                                                                 | 0.6248376 | 41 | 0.1723759 | 50 | 21 |
| 17 | Spacetime | Logit(CF) | Health System Access 2 (unitness), Indoor Air Polluntion (All Cooking Fuels), Smoking Prevalence, Alcohol (liters per capita), Education (years per capita), Lag distributed income per capita (log transformed)                                                                    | 0.6103104 | 11 | 0.1726654 | 81 | 19 |
| 18 | Linear    | Logit(CF) | Health System Access 2 (unitness), Malnutrition - proportion <2SD weight for age (logit transformed), Smoking Prevalence, Alcohol (liters per capita), Education (years per capita), Lag distributed income per capita (log transformed)                                            | 0.6330675 | 55 | 0.1722202 | 38 | 17 |
| 19 | Linear    | Logit(CF) | Malnutrition - poroportion <2SD weight for age (logit transformed), Smoking Prevalence, Alcohol (liters per capita), Education (years per capita), Lag distributed income per capita (log transformed)                                                                              | 0.6497616 | 93 | 0.17195   | 2  | 15 |
| 20 | Linear    | Logit(CF) | Health System Access 2 (unitness), Malnutrition - proportion <2SD weight for age (logit transformed), Indoor Air Polluntion (All Cooking Fuels), Smoking Prevalence, Alcohol (liters per capita), Education (years per capita), Lag distributed income per capita (log transformed) | 0.6349105 | 60 | 0.1722029 | 35 | 14 |
| 21 | Linear    | Logit(CF) | Malnutrition - poroportion <2SD weight for age (logit transformed), Indoor Air Polluntion (All Cooking Fuels), Smoking Prevalence, Alcohol (liters per capita), Education (years per capita)                                                                                        | 0.6509259 | 95 | 0.1719492 | 1  | 12 |
| 22 | Spacetime | Logit(CF) | Health System Access 2 (unitness), Indoor Air Polluntion (All Cooking Fuels), Smoking Prevalence, Education (years per capita), Lag distributed income per capita (log transformed)                                                                                                 | 0.6116747 | 15 | 0.1726727 | 82 | 11 |
| 23 | Spacetime | Logit(CF) | Malnutrition - poroportion <2SD weight for age (logit transformed), Smoking Prevalence                                                                                                                                                                                              | 0.6148293 | 21 | 0.1726072 | 76 | 10 |
| 24 | Spacetime | Logit(CF) | Health System Access 2 (unitness), Malnutrition - proportion <2SD weight for age (logit transformed), Indoor Air Polluntion (All Cooking Fuels), Education (years per capita), Lag distributed income per capita (log transformed)                                                  | 0.6134158 | 18 | 0.1726473 | 80 | 9  |
| 25 | Spacetime | Logit(CF) | Smoking Prevalence, Alcohol (liters per capita), Education (years per capita), Lag distributed income per capita (log transformed)                                                                                                                                                  | 0.6075017 | 8  | 0.1728208 | 92 | 8  |
| 26 | Spacetime | Logit(CF) | Malnutrition - poroportion <2SD weight for age (logit transformed), Education (years per capita), Lag distributed income per capita (log transformed)                                                                                                                               | 0.6225402 | 34 | 0.1725045 | 66 | 7  |

|    |           |           |                                                                                                                                                                                                                                                       |           |     |           |    |   |
|----|-----------|-----------|-------------------------------------------------------------------------------------------------------------------------------------------------------------------------------------------------------------------------------------------------------|-----------|-----|-----------|----|---|
| 27 | Spacetime | Logit(CF) | Health System Access 2 (unitness), Smoking Prevalence, Alcohol (liters per capita), Education (years per capita), Lag distributed income per capita (log transformed)                                                                                 | 0.6045502 | 5   | 0.1728993 | 98 | 7 |
| 28 | Linear    | Logit(CF) | Health System Access 2 (unitness), Malnutrition - proportion <2SD weight for age (logit transformed), Smoking Prevalence, Education (years per capita), Lag distributed income per capita (log transformed)                                           | 0.6350008 | 62  | 0.17224   | 41 | 6 |
| 29 | Linear    | Logit(CF) | Health System Access 2 (unitness), Malnutrition - proportion <2SD weight for age (logit transformed), Indoor Air Pollution (All Cooking Fuels), Smoking Prevalence, Education (years per capita), Lag distributed income per capita (log transformed) | 0.6368202 | 70  | 0.1722132 | 37 | 5 |
| 30 | Spacetime | Logit(CF) | Cumulative Cigarettes (5 Years), Malnutrition - proportion <2SD weight for age (logit transformed), Education (years per capita), Lag distributed income per capita (log transformed)                                                                 | 0.6265637 | 43  | 0.1724813 | 64 | 5 |
| 31 | Linear    | Logit(CF) | Malnutrition - poroportion <2SD weight for age (logit transformed), Smoking Prevalence, Education (years per capita), Lag distributed income per capita (log transformed)                                                                             | 0.6527896 | 100 | 0.1719874 | 7  | 4 |
| 32 | Spacetime | Logit(CF) | Malnutrition - poroportion <2SD weight for age (logit transformed), Smoking Prevalence, Alcohol (liters per capita)                                                                                                                                   | 0.6232836 | 36  | 0.1725922 | 72 | 4 |
| 33 | Spacetime | Logit(CF) | Health System Access 2 (unitness), Malnutrition - proportion <2SD weight for age (logit transformed), Education (years per capita), Lag distributed income per capita (log transformed)                                                               | 0.6159183 | 22  | 0.1727588 | 88 | 4 |
| 34 | Spacetime | Logit(CF) | Health System Access 2 (unitness), Malnutrition - proportion <2SD weight for age (logit transformed), Indoor Air Pollution (All Cooking Fuels), Smoking Prevalence                                                                                    | 0.6203356 | 27  | 0.1727454 | 84 | 3 |
| 35 | Linear    | Logit(CF) | Health System Access 2 (unitness), Malnutrition - proportion <2SD weight for age (logit transformed), Indoor Air Pollution (All Cooking Fuels), Smoking Prevalence, Alcohol (liters per capita)                                                       | 0.6465844 | 81  | 0.1721375 | 30 | 3 |
| 36 | Spacetime | Logit(CF) | Health System Access 2 (unitness), Malnutrition - proportion <2SD weight for age (logit transformed), Indoor Air Pollution (All Cooking Fuels), Smoking Prevalence, Alcohol (liters per capita)                                                       | 0.6191714 | 25  | 0.1727569 | 86 | 3 |
| 37 | Spacetime | Logit(CF) | Indoor Air Pollution (All Cooking Fuels), Smoking Prevalence, Alcohol (liters per capita), Education (years per capita), Lag distributed income per capita (log transformed)                                                                          | 0.6232977 | 37  | 0.1725978 | 74 | 2 |
| 38 | Linear    | Logit(CF) | Malnutrition - poroportion <2SD weight for age (logit transformed), Indoor Air Pollution (All Cooking Fuels), Alcohol (liters per capita), Education (years per capita)                                                                               | 0.6543971 | 108 | 0.1719783 | 4  | 2 |
| 39 | Linear    | Logit(CF) | Malnutrition - poroportion <2SD weight for age (logit transformed), Indoor Air Pollution (All Cooking Fuels), Smoking Prevalence, Education (years per capita)                                                                                        | 0.6539899 | 107 | 0.1719785 | 5  | 2 |
| 40 | Spacetime | Logit(CF) | Health System Access 2 (unitness), Smoking Prevalence, Education (years per capita), Lag distributed income per capita (log transformed)                                                                                                              | 0.6116784 | 16  | 0.1728707 | 95 | 2 |
| 41 | Spacetime | Logit(CF) | Cumulative Cigarettes (5 Years), Malnutrition - proportion <2SD weight for age (logit transformed), Indoor Air Pollution (All Cooking Fuels), Lag distributed income per capita (log transformed)                                                     | 0.6297367 | 48  | 0.1724942 | 65 | 2 |

|    |           |           |                                                                                                                                                                                                                                 |           |     |           |     |   |
|----|-----------|-----------|---------------------------------------------------------------------------------------------------------------------------------------------------------------------------------------------------------------------------------|-----------|-----|-----------|-----|---|
| 42 | Linear    | Logit(CF) | Malnutrition - poroportion <2SD weight for age (logit transformed), Alcohol (liters per capita), Education (years per capita), Lag distributed income per capita (log transformed)                                              | 0.6557249 | 112 | 0.1719761 | 3   | 1 |
| 43 | Linear    | Logit(CF) | Malnutrition - poroportion <2SD weight for age (logit transformed), Smoking Prevalence, Alcohol (liters per capita)                                                                                                             | 0.653331  | 103 | 0.1720023 | 11  | 1 |
| 44 | Spacetime | Logit(CF) | Malnutrition - poroportion <2SD weight for age (logit transformed), Indoor Air Polluntion (All Cooking Fuels), Education (years per capita)                                                                                     | 0.6341395 | 58  | 0.1724572 | 60  | 1 |
| 45 | Linear    | Logit(CF) | Malnutrition - poroportion <2SD weight for age (logit transformed), Indoor Air Polluntion (All Cooking Fuels), Smoking Prevalence, Alcohol (liters per capita)                                                                  | 0.6539142 | 106 | 0.1719881 | 8   | 1 |
| 46 | Spacetime | Logit(CF) | Health System Access 2 (unitness), Indoor Air Polluntion (All Cooking Fuels), Education (years per capita), Lag distributed income per capita (log transformed)                                                                 | 0.6139577 | 20  | 0.1728968 | 97  | 1 |
| 47 | Spacetime | Logit(CF) | Health System Access 2 (unitness), Indoor Air Polluntion (All Cooking Fuels), Alcohol (liters per capita), Education (years per capita), Lag distributed income per capita (log transformed)                                    | 0.6187676 | 24  | 0.1728544 | 94  | 1 |
| 48 | Linear    | Logit(CF) | Health System Access 2 (unitness), Malnutrition - proportion <2SD weight for age (logit transformed), Indoor Air Polluntion (All Cooking Fuels), Smoking Prevalence                                                             | 0.6470698 | 84  | 0.1721395 | 31  | 1 |
| 49 | Spacetime | Logit(CF) | Cumulative Cigarettes (5 Years), Malnutrition - proportion <2SD weight for age (logit transformed), Alcohol (liters per capita)                                                                                                 | 0.6273724 | 46  | 0.1725865 | 71  | 1 |
| 50 | Spacetime | Logit(CF) | Cumulative Cigarettes (5 Years), Malnutrition - proportion <2SD weight for age (logit transformed), Indoor Air Polluntion (All Cooking Fuels), Alcohol (liters per capita)                                                      | 0.6349741 | 61  | 0.1724133 | 54  | 1 |
| 51 | Spacetime | Logit(CF) | Cumulative Cigarettes (5 Years), Malnutrition - proportion <2SD weight for age (logit transformed), Indoor Air Polluntion (All Cooking Fuels), Alcohol (liters per capita), Lag distributed income per capita (log transformed) | 0.6358166 | 65  | 0.1724109 | 53  | 1 |
| 52 | Linear    | Logit(CF) | Smoking Prevalence                                                                                                                                                                                                              | 0.7227351 | 226 | 0.1762145 | 254 | 0 |
| 53 | Spacetime | Logit(CF) | Smoking Prevalence                                                                                                                                                                                                              | 0.6775581 | 155 | 0.1748969 | 157 | 0 |
| 54 | Linear    | Logit(CF) | Smoking Prevalence, Education (years per capita), Lag distributed income per capita (log transformed)                                                                                                                           | 0.6799555 | 156 | 0.1729021 | 99  | 0 |
| 55 | Spacetime | Logit(CF) | Smoking Prevalence, Education (years per capita), Lag distributed income per capita (log transformed)                                                                                                                           | 0.6238866 | 38  | 0.1729484 | 102 | 0 |
| 56 | Linear    | Logit(CF) | Smoking Prevalence, Alcohol (liters per capita)                                                                                                                                                                                 | 0.7218569 | 225 | 0.1761776 | 252 | 0 |
| 57 | Spacetime | Logit(CF) | Smoking Prevalence, Alcohol (liters per capita)                                                                                                                                                                                 | 0.6711252 | 147 | 0.1748657 | 156 | 0 |
| 58 | Linear    | Logit(CF) | Smoking Prevalence, Alcohol (liters per capita), Education (years per capita), Lag distributed income per capita (log transformed)                                                                                              | 0.6692085 | 146 | 0.1727998 | 91  | 0 |
| 59 | Linear    | Logit(CF) | Indoor Air Polluntion (All Cooking Fuels)                                                                                                                                                                                       | 0.7359339 | 242 | 0.1752197 | 182 | 0 |
| 60 | Spacetime | Logit(CF) | Indoor Air Polluntion (All Cooking Fuels)                                                                                                                                                                                       | 0.673189  | 151 | 0.174032  | 144 | 0 |
| 61 | Linear    | Logit(CF) | Indoor Air Polluntion (All Cooking Fuels), Education (years per capita), Lag distributed income per capita (log transformed)                                                                                                    | 0.6871679 | 159 | 0.1732281 | 120 | 0 |
| 62 | Spacetime | Logit(CF) | Indoor Air Polluntion (All Cooking Fuels), Education (years per capita), Lag distributed income per capita (log transformed)                                                                                                    | 0.6475514 | 87  | 0.1731404 | 117 | 0 |
| 63 | Linear    | Logit(CF) | Indoor Air Polluntion (All Cooking Fuels), Alcohol (liters per capita)                                                                                                                                                          | 0.7336282 | 235 | 0.1749857 | 164 | 0 |

|    |           |           |                                                                                                                                                                              |           |     |           |     |   |
|----|-----------|-----------|------------------------------------------------------------------------------------------------------------------------------------------------------------------------------|-----------|-----|-----------|-----|---|
| 64 | Spacetime | Logit(CF) | Indoor Air Pollution (All Cooking Fuels), Alcohol (liters per capita)                                                                                                        | 0.6762564 | 152 | 0.1737991 | 140 | 0 |
| 65 | Linear    | Logit(CF) | Indoor Air Pollution (All Cooking Fuels), Alcohol (liters per capita), Education (years per capita), Lag distributed income per capita (log transformed)                     | 0.663525  | 142 | 0.173181  | 118 | 0 |
| 66 | Spacetime | Logit(CF) | Indoor Air Pollution (All Cooking Fuels), Alcohol (liters per capita), Education (years per capita), Lag distributed income per capita (log transformed)                     | 0.6411995 | 72  | 0.1728263 | 93  | 0 |
| 67 | Linear    | Logit(CF) | Indoor Air Pollution (All Cooking Fuels), Smoking Prevalence                                                                                                                 | 0.69322   | 166 | 0.1743038 | 146 | 0 |
| 68 | Spacetime | Logit(CF) | Indoor Air Pollution (All Cooking Fuels), Smoking Prevalence                                                                                                                 | 0.6618539 | 135 | 0.173453  | 132 | 0 |
| 69 | Linear    | Logit(CF) | Indoor Air Pollution (All Cooking Fuels), Smoking Prevalence, Education (years per capita), Lag distributed income per capita (log transformed)                              | 0.6717304 | 148 | 0.1728763 | 96  | 0 |
| 70 | Spacetime | Logit(CF) | Indoor Air Pollution (All Cooking Fuels), Smoking Prevalence, Education (years per capita), Lag distributed income per capita (log transformed)                              | 0.6363871 | 67  | 0.1727578 | 87  | 0 |
| 71 | Linear    | Logit(CF) | Indoor Air Pollution (All Cooking Fuels), Smoking Prevalence, Alcohol (liters per capita)                                                                                    | 0.692012  | 164 | 0.1741922 | 145 | 0 |
| 72 | Spacetime | Logit(CF) | Indoor Air Pollution (All Cooking Fuels), Smoking Prevalence, Alcohol (liters per capita)                                                                                    | 0.6689523 | 145 | 0.1733532 | 128 | 0 |
| 73 | Linear    | Logit(CF) | Indoor Air Pollution (All Cooking Fuels), Smoking Prevalence, Alcohol (liters per capita), Education (years per capita), Lag distributed income per capita (log transformed) | 0.6580178 | 118 | 0.1727907 | 90  | 0 |
| 74 | Linear    | Logit(CF) | Malnutrition - poroportion <2SD weight for age (logit transformed)                                                                                                           | 0.662939  | 140 | 0.1720327 | 27  | 0 |
| 75 | Spacetime | Logit(CF) | Malnutrition - poroportion <2SD weight for age (logit transformed)                                                                                                           | 0.6267299 | 45  | 0.1726788 | 83  | 0 |
| 76 | Linear    | Logit(CF) | Malnutrition - poroportion <2SD weight for age (logit transformed), Education (years per capita), Lag distributed income per capita (log transformed)                        | 0.6622331 | 138 | 0.1720255 | 23  | 0 |
| 77 | Linear    | Logit(CF) | Malnutrition - poroportion <2SD weight for age (logit transformed), Alcohol (liters per capita)                                                                              | 0.6591483 | 124 | 0.1720118 | 14  | 0 |
| 78 | Spacetime | Logit(CF) | Malnutrition - poroportion <2SD weight for age (logit transformed), Alcohol (liters per capita)                                                                              | 0.6277016 | 47  | 0.1726088 | 77  | 0 |
| 79 | Linear    | Logit(CF) | Malnutrition - poroportion <2SD weight for age (logit transformed), Smoking Prevalence                                                                                       | 0.6551191 | 110 | 0.1720169 | 17  | 0 |
| 80 | Linear    | Logit(CF) | Malnutrition - poroportion <2SD weight for age (logit transformed), Indoor Air Pollution (All Cooking Fuels)                                                                 | 0.6620538 | 137 | 0.1720356 | 28  | 0 |
| 81 | Spacetime | Logit(CF) | Malnutrition - poroportion <2SD weight for age (logit transformed), Indoor Air Pollution (All Cooking Fuels)                                                                 | 0.6342384 | 59  | 0.1725453 | 70  | 0 |
| 82 | Linear    | Logit(CF) | Malnutrition - poroportion <2SD weight for age (logit transformed), Indoor Air Pollution (All Cooking Fuels), Lag distributed income per capita (log transformed)            | 0.6638193 | 143 | 0.172026  | 25  | 0 |
| 83 | Spacetime | Logit(CF) | Malnutrition - poroportion <2SD weight for age (logit transformed), Indoor Air Pollution (All Cooking Fuels), Lag distributed income per capita (log transformed)            | 0.6317616 | 53  | 0.1725316 | 69  | 0 |
| 84 | Linear    | Logit(CF) | Malnutrition - poroportion <2SD weight for age (logit transformed), Indoor Air Pollution (All Cooking Fuels), Education (years per capita)                                   | 0.6603668 | 131 | 0.172022  | 22  | 0 |
| 85 | Linear    | Logit(CF) | Malnutrition - poroportion <2SD weight for age (logit transformed), Indoor Air Pollution (All Cooking Fuels), Alcohol (liters per capita)                                    | 0.657848  | 116 | 0.1720166 | 16  | 0 |
| 86 | Spacetime | Logit(CF) | Malnutrition - poroportion <2SD weight for age (logit transformed), Indoor Air Pollution (All Cooking Fuels), Alcohol (liters per capita)                                    | 0.6354592 | 63  | 0.1724384 | 59  | 0 |

|     |           |           |                                                                                                                                                                                                                     |           |     |           |     |   |
|-----|-----------|-----------|---------------------------------------------------------------------------------------------------------------------------------------------------------------------------------------------------------------------|-----------|-----|-----------|-----|---|
| 87  | Linear    | Logit(CF) | Malnutrition - poroportion <2SD weight for age (logit transformed), Indoor Air Polluntion (All Cooking Fuels), Alcohol (liters per capita), Lag distributed income per capita (log transformed)                     | 0.6601422 | 128 | 0.1720083 | 12  | 0 |
| 88  | Spacetime | Logit(CF) | Malnutrition - poroportion <2SD weight for age (logit transformed), Indoor Air Polluntion (All Cooking Fuels), Alcohol (liters per capita), Lag distributed income per capita (log transformed)                     | 0.6360226 | 66  | 0.1724324 | 58  | 0 |
| 89  | Linear    | Logit(CF) | Malnutrition - poroportion <2SD weight for age (logit transformed), Indoor Air Polluntion (All Cooking Fuels), Smoking Prevalence                                                                                   | 0.6549741 | 109 | 0.1719989 | 10  | 0 |
| 90  | Linear    | Logit(CF) | Malnutrition - poroportion <2SD weight for age (logit transformed), Indoor Air Polluntion (All Cooking Fuels), Smoking Prevalence, Lag distributed income per capita (log transformed)                              | 0.6587554 | 121 | 0.1719883 | 9   | 0 |
| 91  | Linear    | Logit(CF) | Malnutrition - poroportion <2SD weight for age (logit transformed), Indoor Air Polluntion (All Cooking Fuels), Smoking Prevalence, Alcohol (liters per capita), Lag distributed income per capita (log transformed) | 0.6580889 | 119 | 0.1719797 | 6   | 0 |
| 92  | Linear    | Logit(CF) | Health System Access 2 (unitness)                                                                                                                                                                                   | 0.6598502 | 125 | 0.1761676 | 251 | 0 |
| 93  | Spacetime | Logit(CF) | Health System Access 2 (unitness)                                                                                                                                                                                   | 0.6426683 | 75  | 0.1747    | 153 | 0 |
| 94  | Linear    | Logit(CF) | Health System Access 2 (unitness), Education (years per capita), Lag distributed income per capita (log transformed)                                                                                                | 0.6588548 | 122 | 0.1734445 | 131 | 0 |
| 95  | Spacetime | Logit(CF) | Health System Access 2 (unitness), Education (years per capita), Lag distributed income per capita (log transformed)                                                                                                | 0.6186669 | 23  | 0.1730828 | 110 | 0 |
| 96  | Linear    | Logit(CF) | Health System Access 2 (unitness), Alcohol (liters per capita)                                                                                                                                                      | 0.6564471 | 114 | 0.1762135 | 253 | 0 |
| 97  | Spacetime | Logit(CF) | Health System Access 2 (unitness), Alcohol (liters per capita)                                                                                                                                                      | 0.6484318 | 92  | 0.1747965 | 154 | 0 |
| 98  | Linear    | Logit(CF) | Health System Access 2 (unitness), Alcohol (liters per capita), Education (years per capita), Lag distributed income per capita (log transformed)                                                                   | 0.6506145 | 94  | 0.1733849 | 129 | 0 |
| 99  | Spacetime | Logit(CF) | Health System Access 2 (unitness), Alcohol (liters per capita), Education (years per capita), Lag distributed income per capita (log transformed)                                                                   | 0.6120552 | 17  | 0.1730775 | 109 | 0 |
| 100 | Linear    | Logit(CF) | Health System Access 2 (unitness), Smoking Prevalence                                                                                                                                                               | 0.6524196 | 98  | 0.1753482 | 200 | 0 |
| 101 | Spacetime | Logit(CF) | Health System Access 2 (unitness), Smoking Prevalence                                                                                                                                                               | 0.636512  | 68  | 0.1743372 | 147 | 0 |
| 102 | Linear    | Logit(CF) | Health System Access 2 (unitness), Smoking Prevalence, Education (years per capita), Lag distributed income per capita (log transformed)                                                                            | 0.6477208 | 89  | 0.1731359 | 116 | 0 |
| 103 | Linear    | Logit(CF) | Health System Access 2 (unitness), Smoking Prevalence, Alcohol (liters per capita)                                                                                                                                  | 0.6518878 | 97  | 0.1753687 | 203 | 0 |
| 104 | Spacetime | Logit(CF) | Health System Access 2 (unitness), Smoking Prevalence, Alcohol (liters per capita)                                                                                                                                  | 0.6356773 | 64  | 0.1744471 | 150 | 0 |
| 105 | Linear    | Logit(CF) | Health System Access 2 (unitness), Smoking Prevalence, Alcohol (liters per capita), Education (years per capita), Lag distributed income per capita (log transformed)                                               | 0.6425735 | 74  | 0.1730965 | 111 | 0 |
| 106 | Linear    | Logit(CF) | Health System Access 2 (unitness), Indoor Air Polluntion (All Cooking Fuels)                                                                                                                                        | 0.6613891 | 134 | 0.1744574 | 151 | 0 |
| 107 | Spacetime | Logit(CF) | Health System Access 2 (unitness), Indoor Air Polluntion (All Cooking Fuels)                                                                                                                                        | 0.6341249 | 57  | 0.1735089 | 135 | 0 |
| 108 | Linear    | Logit(CF) | Health System Access 2 (unitness), Indoor Air Polluntion (All Cooking Fuels), Education (years per capita), Lag distributed income per capita (log transformed)                                                     | 0.6634022 | 141 | 0.17342   | 130 | 0 |

|     |           |           |                                                                                                                                                                                                                      |           |     |           |     |   |
|-----|-----------|-----------|----------------------------------------------------------------------------------------------------------------------------------------------------------------------------------------------------------------------|-----------|-----|-----------|-----|---|
| 109 | Linear    | Logit(CF) | Health System Access 2 (unitness), Indoor Air Pollution (All Cooking Fuels), Alcohol (liters per capita)                                                                                                             | 0.6555287 | 111 | 0.1744695 | 152 | 0 |
| 110 | Spacetime | Logit(CF) | Health System Access 2 (unitness), Indoor Air Pollution (All Cooking Fuels), Alcohol (liters per capita)                                                                                                             | 0.6413046 | 73  | 0.1735324 | 136 | 0 |
| 111 | Linear    | Logit(CF) | Health System Access 2 (unitness), Indoor Air Pollution (All Cooking Fuels), Alcohol (liters per capita), Education (years per capita), Lag distributed income per capita (log transformed)                          | 0.6526333 | 99  | 0.1733455 | 127 | 0 |
| 112 | Linear    | Logit(CF) | Health System Access 2 (unitness), Indoor Air Pollution (All Cooking Fuels), Smoking Prevalence                                                                                                                      | 0.6472619 | 85  | 0.1739097 | 142 | 0 |
| 113 | Spacetime | Logit(CF) | Health System Access 2 (unitness), Indoor Air Pollution (All Cooking Fuels), Smoking Prevalence                                                                                                                      | 0.6305965 | 51  | 0.1732082 | 119 | 0 |
| 114 | Linear    | Logit(CF) | Health System Access 2 (unitness), Indoor Air Pollution (All Cooking Fuels), Smoking Prevalence, Education (years per capita), Lag distributed income per capita (log transformed)                                   | 0.6516746 | 96  | 0.1730975 | 112 | 0 |
| 115 | Linear    | Logit(CF) | Health System Access 2 (unitness), Indoor Air Pollution (All Cooking Fuels), Smoking Prevalence, Alcohol (liters per capita)                                                                                         | 0.6468015 | 83  | 0.1739284 | 143 | 0 |
| 116 | Spacetime | Logit(CF) | Health System Access 2 (unitness), Indoor Air Pollution (All Cooking Fuels), Smoking Prevalence, Alcohol (liters per capita)                                                                                         | 0.6303542 | 49  | 0.1732514 | 122 | 0 |
| 117 | Linear    | Logit(CF) | Health System Access 2 (unitness), Indoor Air Pollution (All Cooking Fuels), Smoking Prevalence, Alcohol (liters per capita), Education (years per capita), Lag distributed income per capita (log transformed)      | 0.6473855 | 86  | 0.1730489 | 105 | 0 |
| 118 | Linear    | Logit(CF) | Health System Access 2 (unitness), Malnutrition - proportion <2SD weight for age (logit transformed)                                                                                                                 | 0.653684  | 104 | 0.1722355 | 40  | 0 |
| 119 | Spacetime | Logit(CF) | Health System Access 2 (unitness), Malnutrition - proportion <2SD weight for age (logit transformed)                                                                                                                 | 0.6245565 | 39  | 0.1732503 | 121 | 0 |
| 120 | Linear    | Logit(CF) | Health System Access 2 (unitness), Malnutrition - proportion <2SD weight for age (logit transformed), Education (years per capita), Lag distributed income per capita (log transformed)                              | 0.6455116 | 79  | 0.1723075 | 47  | 0 |
| 121 | Linear    | Logit(CF) | Health System Access 2 (unitness), Malnutrition - proportion <2SD weight for age (logit transformed), Alcohol (liters per capita)                                                                                    | 0.6531534 | 102 | 0.1722271 | 39  | 0 |
| 122 | Spacetime | Logit(CF) | Health System Access 2 (unitness), Malnutrition - proportion <2SD weight for age (logit transformed), Alcohol (liters per capita)                                                                                    | 0.6212522 | 30  | 0.1732754 | 125 | 0 |
| 123 | Linear    | Logit(CF) | Health System Access 2 (unitness), Malnutrition - proportion <2SD weight for age (logit transformed), Alcohol (liters per capita), Education (years per capita), Lag distributed income per capita (log transformed) | 0.6432653 | 77  | 0.1722791 | 44  | 0 |
| 124 | Linear    | Logit(CF) | Health System Access 2 (unitness), Malnutrition - proportion <2SD weight for age (logit transformed), Smoking Prevalence                                                                                             | 0.6477809 | 90  | 0.1721821 | 33  | 0 |
| 125 | Spacetime | Logit(CF) | Health System Access 2 (unitness), Malnutrition - proportion <2SD weight for age (logit transformed), Smoking Prevalence                                                                                             | 0.6135879 | 19  | 0.173071  | 108 | 0 |
| 126 | Linear    | Logit(CF) | Health System Access 2 (unitness), Malnutrition - proportion <2SD weight for age (logit transformed), Smoking Prevalence, Alcohol (liters per capita)                                                                | 0.6475686 | 88  | 0.1721747 | 32  | 0 |
| 127 | Spacetime | Logit(CF) | Health System Access 2 (unitness), Malnutrition - proportion <2SD weight for age (logit transformed), Smoking Prevalence, Alcohol (liters per capita)                                                                | 0.6109562 | 13  | 0.1731124 | 113 | 0 |



|     |           |           |                                                                                                                                                                                                                                                                |           |     |           |     |   |
|-----|-----------|-----------|----------------------------------------------------------------------------------------------------------------------------------------------------------------------------------------------------------------------------------------------------------------|-----------|-----|-----------|-----|---|
| 128 | Linear    | Logit(CF) | Health System Access 2 (unitness), Malnutrition - proportion <2SD weight for age (logit transformed), Indoor Air Pollution (All Cooking Fuels)                                                                                                                 | 0.65385   | 105 | 0.1722039 | 36  | 0 |
| 129 | Spacetime | Logit(CF) | Health System Access 2 (unitness), Malnutrition - proportion <2SD weight for age (logit transformed), Indoor Air Pollution (All Cooking Fuels)                                                                                                                 | 0.626655  | 44  | 0.172935  | 101 | 0 |
| 130 | Linear    | Logit(CF) | Health System Access 2 (unitness), Malnutrition - proportion <2SD weight for age (logit transformed), Indoor Air Pollution (All Cooking Fuels), Education (years per capita), Lag distributed income per capita (log transformed)                              | 0.6466863 | 82  | 0.1722907 | 45  | 0 |
| 131 | Linear    | Logit(CF) | Health System Access 2 (unitness), Malnutrition - proportion <2SD weight for age (logit transformed), Indoor Air Pollution (All Cooking Fuels), Alcohol (liters per capita)                                                                                    | 0.6528019 | 101 | 0.1721996 | 34  | 0 |
| 132 | Spacetime | Logit(CF) | Health System Access 2 (unitness), Malnutrition - proportion <2SD weight for age (logit transformed), Indoor Air Pollution (All Cooking Fuels), Alcohol (liters per capita)                                                                                    | 0.6304522 | 50  | 0.1729246 | 100 | 0 |
| 133 | Linear    | Logit(CF) | Health System Access 2 (unitness), Malnutrition - proportion <2SD weight for age (logit transformed), Indoor Air Pollution (All Cooking Fuels), Alcohol (liters per capita), Education (years per capita), Lag distributed income per capita (log transformed) | 0.6456704 | 80  | 0.1722718 | 42  | 0 |
| 134 | Linear    | Logit(CF) | Cumulative Cigarettes (5 Years)                                                                                                                                                                                                                                | 0.7765191 | 313 | 0.1773649 | 305 | 0 |
| 135 | Spacetime | Logit(CF) | Cumulative Cigarettes (5 Years)                                                                                                                                                                                                                                | 0.6998442 | 174 | 0.1756035 | 216 | 0 |
| 136 | Linear    | Logit(CF) | Cumulative Cigarettes (5 Years), Education (years per capita), Lag distributed income per capita (log transformed)                                                                                                                                             | 0.6867598 | 158 | 0.1731308 | 114 | 0 |
| 137 | Spacetime | Logit(CF) | Cumulative Cigarettes (5 Years), Education (years per capita), Lag distributed income per capita (log transformed)                                                                                                                                             | 0.6435418 | 78  | 0.1732546 | 123 | 0 |
| 138 | Linear    | Logit(CF) | Cumulative Cigarettes (5 Years), Alcohol (liters per capita)                                                                                                                                                                                                   | 0.7757529 | 309 | 0.1772044 | 297 | 0 |
| 139 | Spacetime | Logit(CF) | Cumulative Cigarettes (5 Years), Alcohol (liters per capita)                                                                                                                                                                                                   | 0.6941713 | 167 | 0.1754864 | 211 | 0 |
| 140 | Linear    | Logit(CF) | Cumulative Cigarettes (5 Years), Alcohol (liters per capita), Education (years per capita), Lag distributed income per capita (log transformed)                                                                                                                | 0.673102  | 150 | 0.1730311 | 104 | 0 |
| 141 | Spacetime | Logit(CF) | Cumulative Cigarettes (5 Years), Alcohol (liters per capita), Education (years per capita), Lag distributed income per capita (log transformed)                                                                                                                | 0.6192465 | 26  | 0.1730041 | 103 | 0 |
| 142 | Linear    | Logit(CF) | Cumulative Cigarettes (5 Years), Indoor Air Pollution (All Cooking Fuels)                                                                                                                                                                                      | 0.7323562 | 231 | 0.1750238 | 165 | 0 |
| 143 | Spacetime | Logit(CF) | Cumulative Cigarettes (5 Years), Indoor Air Pollution (All Cooking Fuels)                                                                                                                                                                                      | 0.672965  | 149 | 0.1738898 | 141 | 0 |
| 144 | Linear    | Logit(CF) | Cumulative Cigarettes (5 Years), Indoor Air Pollution (All Cooking Fuels), Education (years per capita), Lag distributed income per capita (log transformed)                                                                                                   | 0.6774362 | 153 | 0.1731337 | 115 | 0 |
| 145 | Spacetime | Logit(CF) | Cumulative Cigarettes (5 Years), Indoor Air Pollution (All Cooking Fuels), Education (years per capita), Lag distributed income per capita (log transformed)                                                                                                   | 0.6481869 | 91  | 0.173065  | 106 | 0 |
| 146 | Linear    | Logit(CF) | Cumulative Cigarettes (5 Years), Indoor Air Pollution (All Cooking Fuels), Alcohol (liters per capita)                                                                                                                                                         | 0.7287478 | 230 | 0.1748051 | 155 | 0 |
| 147 | Spacetime | Logit(CF) | Cumulative Cigarettes (5 Years), Indoor Air Pollution (All Cooking Fuels), Alcohol (liters per capita)                                                                                                                                                         | 0.6775439 | 154 | 0.1737005 | 138 | 0 |

|     |           |           |                                                                                                                                                                                                                                |           |     |           |     |   |
|-----|-----------|-----------|--------------------------------------------------------------------------------------------------------------------------------------------------------------------------------------------------------------------------------|-----------|-----|-----------|-----|---|
| 148 | Linear    | Logit(CF) | Cumulative Cigarettes (5 Years), Indoor Air Pollution (All Cooking Fuels), Alcohol (liters per capita), Education (years per capita), Lag distributed income per capita (log transformed)                                      | 0.6602557 | 130 | 0.1730684 | 107 | 0 |
| 149 | Spacetime | Logit(CF) | Cumulative Cigarettes (5 Years), Indoor Air Pollution (All Cooking Fuels), Alcohol (liters per capita), Education (years per capita), Lag distributed income per capita (log transformed)                                      | 0.6427336 | 76  | 0.1727808 | 89  | 0 |
| 150 | Linear    | Logit(CF) | Cumulative Cigarettes (5 Years), Malnutrition - proportion <2SD weight for age (logit transformed)                                                                                                                             | 0.6609531 | 133 | 0.1720298 | 26  | 0 |
| 151 | Spacetime | Logit(CF) | Cumulative Cigarettes (5 Years), Malnutrition - proportion <2SD weight for age (logit transformed)                                                                                                                             | 0.6255799 | 42  | 0.1726444 | 79  | 0 |
| 152 | Linear    | Logit(CF) | Cumulative Cigarettes (5 Years), Malnutrition - proportion <2SD weight for age (logit transformed), Education (years per capita), Lag distributed income per capita (log transformed)                                          | 0.6599743 | 126 | 0.1720207 | 20  | 0 |
| 153 | Linear    | Logit(CF) | Cumulative Cigarettes (5 Years), Malnutrition - proportion <2SD weight for age (logit transformed), Alcohol (liters per capita)                                                                                                | 0.6584365 | 120 | 0.172014  | 15  | 0 |
| 154 | Linear    | Logit(CF) | Cumulative Cigarettes (5 Years), Malnutrition - proportion <2SD weight for age (logit transformed), Alcohol (liters per capita), Lag distributed income per capita (log transformed)                                           | 0.6590921 | 123 | 0.1720207 | 19  | 0 |
| 155 | Spacetime | Logit(CF) | Cumulative Cigarettes (5 Years), Malnutrition - proportion <2SD weight for age (logit transformed), Alcohol (liters per capita), Lag distributed income per capita (log transformed)                                           | 0.6311481 | 52  | 0.1725296 | 68  | 0 |
| 156 | Linear    | Logit(CF) | Cumulative Cigarettes (5 Years), Malnutrition - proportion <2SD weight for age (logit transformed), Indoor Air Pollution (All Cooking Fuels)                                                                                   | 0.660179  | 129 | 0.172036  | 29  | 0 |
| 157 | Spacetime | Logit(CF) | Cumulative Cigarettes (5 Years), Malnutrition - proportion <2SD weight for age (logit transformed), Indoor Air Pollution (All Cooking Fuels)                                                                                   | 0.6324658 | 54  | 0.172506  | 67  | 0 |
| 158 | Linear    | Logit(CF) | Cumulative Cigarettes (5 Years), Malnutrition - proportion <2SD weight for age (logit transformed), Indoor Air Pollution (All Cooking Fuels), Lag distributed income per capita (log transformed)                              | 0.6619837 | 136 | 0.1720258 | 24  | 0 |
| 159 | Linear    | Logit(CF) | Cumulative Cigarettes (5 Years), Malnutrition - proportion <2SD weight for age (logit transformed), Indoor Air Pollution (All Cooking Fuels), Education (years per capita)                                                     | 0.6579903 | 117 | 0.1720215 | 21  | 0 |
| 160 | Spacetime | Logit(CF) | Cumulative Cigarettes (5 Years), Malnutrition - proportion <2SD weight for age (logit transformed), Indoor Air Pollution (All Cooking Fuels), Education (years per capita)                                                     | 0.6365533 | 69  | 0.1724302 | 56  | 0 |
| 161 | Linear    | Logit(CF) | Cumulative Cigarettes (5 Years), Malnutrition - proportion <2SD weight for age (logit transformed), Indoor Air Pollution (All Cooking Fuels), Alcohol (liters per capita)                                                      | 0.6571108 | 115 | 0.1720205 | 18  | 0 |
| 162 | Linear    | Logit(CF) | Cumulative Cigarettes (5 Years), Malnutrition - proportion <2SD weight for age (logit transformed), Indoor Air Pollution (All Cooking Fuels), Alcohol (liters per capita), Lag distributed income per capita (log transformed) | 0.6599824 | 127 | 0.1720113 | 13  | 0 |
| 163 | Linear    | Logit(CF) | Cumulative Cigarettes (5 Years), Health System Access 2 (unitness), Indoor Air Pollution (All Cooking Fuels)                                                                                                                   | 0.6604289 | 132 | 0.1743774 | 148 | 0 |
| 164 | Spacetime | Logit(CF) | Cumulative Cigarettes (5 Years), Health System Access 2 (unitness), Indoor Air Pollution (All Cooking Fuels)                                                                                                                   | 0.6338233 | 56  | 0.173467  | 133 | 0 |
| 165 | Linear    | Logit(CF) | Cumulative Cigarettes (5 Years), Health System Access 2 (unitness), Indoor Air Pollution (All Cooking Fuels), Lag distributed income per capita (log transformed)                                                              | 0.666151  | 144 | 0.1736978 | 137 | 0 |

|     |           |           |                                                                                                                                                                                                |           |     |           |     |   |
|-----|-----------|-----------|------------------------------------------------------------------------------------------------------------------------------------------------------------------------------------------------|-----------|-----|-----------|-----|---|
| 166 | Spacetime | Logit(CF) | Cumulative Cigarettes (5 Years), Health System Access 2 (unitness), Indoor Air Pollution (All Cooking Fuels), Lag distributed income per capita (log transformed)                              | 0.6248242 | 40  | 0.1732563 | 124 | 0 |
| 167 | Linear    | Logit(CF) | Cumulative Cigarettes (5 Years), Health System Access 2 (unitness), Indoor Air Pollution (All Cooking Fuels), Alcohol (liters per capita)                                                      | 0.6559005 | 113 | 0.1744251 | 149 | 0 |
| 168 | Spacetime | Logit(CF) | Cumulative Cigarettes (5 Years), Health System Access 2 (unitness), Indoor Air Pollution (All Cooking Fuels), Alcohol (liters per capita)                                                      | 0.6410928 | 71  | 0.1734884 | 134 | 0 |
| 169 | Linear    | Logit(CF) | Cumulative Cigarettes (5 Years), Health System Access 2 (unitness), Indoor Air Pollution (All Cooking Fuels), Alcohol (liters per capita), Lag distributed income per capita (log transformed) | 0.6629137 | 139 | 0.1737133 | 139 | 0 |
| 170 | Spacetime | Logit(CF) | Cumulative Cigarettes (5 Years), Health System Access 2 (unitness), Indoor Air Pollution (All Cooking Fuels), Alcohol (liters per capita), Lag distributed income per capita (log transformed) | 0.6225322 | 33  | 0.1732891 | 126 | 0 |
| 171 | Linear    | Ln(Rate)  | Smoking Prevalence                                                                                                                                                                             | 0.8997263 | 350 | 0.1851731 | 352 | 0 |
| 172 | Spacetime | Ln(Rate)  | Smoking Prevalence                                                                                                                                                                             | 0.8203284 | 338 | 0.1819459 | 341 | 0 |
| 173 | Linear    | Ln(Rate)  | Smoking Prevalence, Education (years per capita), Lag distributed income per capita (log transformed)                                                                                          | 0.795607  | 328 | 0.1770567 | 290 | 0 |
| 174 | Spacetime | Ln(Rate)  | Smoking Prevalence, Education (years per capita), Lag distributed income per capita (log transformed)                                                                                          | 0.7329592 | 233 | 0.1768721 | 284 | 0 |
| 175 | Linear    | Ln(Rate)  | Smoking Prevalence, Alcohol (liters per capita)                                                                                                                                                | 0.898167  | 349 | 0.1849845 | 351 | 0 |
| 176 | Spacetime | Ln(Rate)  | Smoking Prevalence, Alcohol (liters per capita)                                                                                                                                                | 0.8241605 | 339 | 0.1818333 | 339 | 0 |
| 177 | Linear    | Ln(Rate)  | Smoking Prevalence, Alcohol (liters per capita), Education (years per capita), Lag distributed income per capita (log transformed)                                                             | 0.7657899 | 292 | 0.1769601 | 287 | 0 |
| 178 | Spacetime | Ln(Rate)  | Smoking Prevalence, Alcohol (liters per capita), Education (years per capita), Lag distributed income per capita (log transformed)                                                             | 0.7098908 | 197 | 0.1765668 | 272 | 0 |
| 179 | Linear    | Ln(Rate)  | Indoor Air Pollution (All Cooking Fuels)                                                                                                                                                       | 0.9218276 | 352 | 0.1820234 | 343 | 0 |
| 180 | Spacetime | Ln(Rate)  | Indoor Air Pollution (All Cooking Fuels)                                                                                                                                                       | 0.8097579 | 337 | 0.179991  | 326 | 0 |
| 181 | Linear    | Ln(Rate)  | Indoor Air Pollution (All Cooking Fuels), Education (years per capita), Lag distributed income per capita (log transformed)                                                                    | 0.8481866 | 346 | 0.1774729 | 307 | 0 |
| 182 | Spacetime | Ln(Rate)  | Indoor Air Pollution (All Cooking Fuels), Education (years per capita), Lag distributed income per capita (log transformed)                                                                    | 0.7474166 | 257 | 0.1772329 | 298 | 0 |
| 183 | Linear    | Ln(Rate)  | Indoor Air Pollution (All Cooking Fuels), Alcohol (liters per capita)                                                                                                                          | 0.9107075 | 351 | 0.1815417 | 338 | 0 |
| 184 | Spacetime | Ln(Rate)  | Indoor Air Pollution (All Cooking Fuels), Alcohol (liters per capita)                                                                                                                          | 0.8031404 | 335 | 0.1796264 | 321 | 0 |
| 185 | Linear    | Ln(Rate)  | Indoor Air Pollution (All Cooking Fuels), Alcohol (liters per capita), Education (years per capita), Lag distributed income per capita (log transformed)                                       | 0.7813048 | 318 | 0.1774655 | 306 | 0 |
| 186 | Spacetime | Ln(Rate)  | Indoor Air Pollution (All Cooking Fuels), Alcohol (liters per capita), Education (years per capita), Lag distributed income per capita (log transformed)                                       | 0.7268813 | 228 | 0.1766528 | 275 | 0 |
| 187 | Linear    | Ln(Rate)  | Indoor Air Pollution (All Cooking Fuels), Smoking Prevalence                                                                                                                                   | 0.8468554 | 345 | 0.1811555 | 336 | 0 |
| 188 | Spacetime | Ln(Rate)  | Indoor Air Pollution (All Cooking Fuels), Smoking Prevalence                                                                                                                                   | 0.7890035 | 325 | 0.1791577 | 318 | 0 |
| 189 | Linear    | Ln(Rate)  | Indoor Air Pollution (All Cooking Fuels), Smoking Prevalence, Education (years per capita), Lag distributed income per capita (log transformed)                                                | 0.7984287 | 331 | 0.1770216 | 289 | 0 |
| 190 | Spacetime | Ln(Rate)  | Indoor Air Pollution (All Cooking Fuels), Smoking Prevalence, Education (years per capita), Lag distributed income per capita (log transformed)                                                | 0.7360635 | 243 | 0.1766778 | 277 | 0 |
| 191 | Linear    | Ln(Rate)  | Indoor Air Pollution (All Cooking Fuels), Smoking Prevalence, Alcohol (liters per capita)                                                                                                      | 0.8331756 | 342 | 0.1807825 | 335 | 0 |

|     |           |          |                                                                                                                                                                                                        |           |     |           |     |   |
|-----|-----------|----------|--------------------------------------------------------------------------------------------------------------------------------------------------------------------------------------------------------|-----------|-----|-----------|-----|---|
| 192 | Spacetime | Ln(Rate) | Indoor Air Pollution (All Cooking Fuels), Smoking Prevalence, Alcohol (liters per capita)                                                                                                              | 0.7762092 | 311 | 0.1789183 | 317 | 0 |
| 193 | Linear    | Ln(Rate) | Indoor Air Pollution (All Cooking Fuels), Smoking Prevalence, Alcohol (liters per capita), Education (years per capita), Lag distributed income per capita (log transformed)                           | 0.7652784 | 290 | 0.1769157 | 285 | 0 |
| 194 | Spacetime | Ln(Rate) | Indoor Air Pollution (All Cooking Fuels), Smoking Prevalence, Alcohol (liters per capita), Education (years per capita), Lag distributed income per capita (log transformed)                           | 0.7179884 | 215 | 0.1763469 | 262 | 0 |
| 195 | Linear    | Ln(Rate) | Malnutrition - poroportion <2SD weight for age (logit transformed)                                                                                                                                     | 0.7818431 | 319 | 0.1752264 | 183 | 0 |
| 196 | Spacetime | Ln(Rate) | Malnutrition - poroportion <2SD weight for age (logit transformed)                                                                                                                                     | 0.7171843 | 213 | 0.1760696 | 244 | 0 |
| 197 | Linear    | Ln(Rate) | Malnutrition - poroportion <2SD weight for age (logit transformed), Education (years per capita), Lag distributed income per capita (log transformed)                                                  | 0.7721454 | 301 | 0.1751092 | 171 | 0 |
| 198 | Spacetime | Ln(Rate) | Malnutrition - poroportion <2SD weight for age (logit transformed), Education (years per capita), Lag distributed income per capita (log transformed)                                                  | 0.7113256 | 200 | 0.1757736 | 230 | 0 |
| 199 | Linear    | Ln(Rate) | Malnutrition - poroportion <2SD weight for age (logit transformed), Alcohol (liters per capita)                                                                                                        | 0.7664945 | 294 | 0.1751366 | 175 | 0 |
| 200 | Spacetime | Ln(Rate) | Malnutrition - poroportion <2SD weight for age (logit transformed), Alcohol (liters per capita)                                                                                                        | 0.7206084 | 221 | 0.1758699 | 234 | 0 |
| 201 | Linear    | Ln(Rate) | Malnutrition - poroportion <2SD weight for age (logit transformed), Alcohol (liters per capita), Education (years per capita), Lag distributed income per capita (log transformed)                     | 0.7504016 | 263 | 0.1749239 | 160 | 0 |
| 202 | Spacetime | Ln(Rate) | Malnutrition - poroportion <2SD weight for age (logit transformed), Alcohol (liters per capita), Education (years per capita), Lag distributed income per capita (log transformed)                     | 0.6922181 | 165 | 0.175697  | 224 | 0 |
| 203 | Linear    | Ln(Rate) | Malnutrition - poroportion <2SD weight for age (logit transformed), Smoking Prevalence                                                                                                                 | 0.774226  | 305 | 0.1752329 | 184 | 0 |
| 204 | Spacetime | Ln(Rate) | Malnutrition - poroportion <2SD weight for age (logit transformed), Smoking Prevalence                                                                                                                 | 0.7140228 | 207 | 0.1760341 | 241 | 0 |
| 205 | Linear    | Ln(Rate) | Malnutrition - poroportion <2SD weight for age (logit transformed), Smoking Prevalence, Education (years per capita), Lag distributed income per capita (log transformed)                              | 0.7658247 | 293 | 0.1750999 | 169 | 0 |
| 206 | Spacetime | Ln(Rate) | Malnutrition - poroportion <2SD weight for age (logit transformed), Smoking Prevalence, Education (years per capita), Lag distributed income per capita (log transformed)                              | 0.6966887 | 171 | 0.175619  | 217 | 0 |
| 207 | Linear    | Ln(Rate) | Malnutrition - poroportion <2SD weight for age (logit transformed), Smoking Prevalence, Alcohol (liters per capita)                                                                                    | 0.7632111 | 285 | 0.1751439 | 177 | 0 |
| 208 | Spacetime | Ln(Rate) | Malnutrition - poroportion <2SD weight for age (logit transformed), Smoking Prevalence, Alcohol (liters per capita)                                                                                    | 0.7185084 | 217 | 0.175892  | 238 | 0 |
| 209 | Linear    | Ln(Rate) | Malnutrition - poroportion <2SD weight for age (logit transformed), Smoking Prevalence, Alcohol (liters per capita), Education (years per capita), Lag distributed income per capita (log transformed) | 0.7466923 | 255 | 0.1749254 | 161 | 0 |
| 210 | Spacetime | Ln(Rate) | Malnutrition - poroportion <2SD weight for age (logit transformed), Smoking Prevalence, Alcohol (liters per capita), Education (years per capita), Lag distributed income per capita (log transformed) | 0.6856083 | 157 | 0.1756286 | 219 | 0 |
| 211 | Linear    | Ln(Rate) | Malnutrition - poroportion <2SD weight for age (logit transformed), Indoor Air Pollution (All Cooking Fuels)                                                                                           | 0.7963127 | 329 | 0.1752126 | 181 | 0 |

|     |           |          |                                                                                                                                                                                                                                                   |           |     |           |     |   |
|-----|-----------|----------|---------------------------------------------------------------------------------------------------------------------------------------------------------------------------------------------------------------------------------------------------|-----------|-----|-----------|-----|---|
| 212 | Spacetime | Ln(Rate) | Malnutrition - poroportion <2SD weight for age (logit transformed), Indoor Air Polluntion (All Cooking Fuels)                                                                                                                                     | 0.7208639 | 222 | 0.1761301 | 247 | 0 |
| 213 | Linear    | Ln(Rate) | Malnutrition - poroportion <2SD weight for age (logit transformed), Indoor Air Polluntion (All Cooking Fuels), Education (years per capita), Lag distributed income per capita (log transformed)                                                  | 0.7879914 | 323 | 0.1751052 | 170 | 0 |
| 214 | Spacetime | Ln(Rate) | Malnutrition - poroportion <2SD weight for age (logit transformed), Indoor Air Polluntion (All Cooking Fuels), Education (years per capita), Lag distributed income per capita (log transformed)                                                  | 0.7196151 | 218 | 0.1757415 | 227 | 0 |
| 215 | Linear    | Ln(Rate) | Malnutrition - poroportion <2SD weight for age (logit transformed), Indoor Air Polluntion (All Cooking Fuels), Alcohol (liters per capita)                                                                                                        | 0.7753746 | 308 | 0.1751327 | 172 | 0 |
| 216 | Spacetime | Ln(Rate) | Malnutrition - poroportion <2SD weight for age (logit transformed), Indoor Air Polluntion (All Cooking Fuels), Alcohol (liters per capita)                                                                                                        | 0.715349  | 209 | 0.1759122 | 239 | 0 |
| 217 | Linear    | Ln(Rate) | Malnutrition - poroportion <2SD weight for age (logit transformed), Indoor Air Polluntion (All Cooking Fuels), Alcohol (liters per capita), Education (years per capita), Lag distributed income per capita (log transformed)                     | 0.7606949 | 281 | 0.1749291 | 162 | 0 |
| 218 | Spacetime | Ln(Rate) | Malnutrition - poroportion <2SD weight for age (logit transformed), Indoor Air Polluntion (All Cooking Fuels), Alcohol (liters per capita), Education (years per capita), Lag distributed income per capita (log transformed)                     | 0.7052094 | 186 | 0.1756245 | 218 | 0 |
| 219 | Linear    | Ln(Rate) | Malnutrition - poroportion <2SD weight for age (logit transformed), Indoor Air Polluntion (All Cooking Fuels), Smoking Prevalence                                                                                                                 | 0.7889113 | 324 | 0.1752119 | 180 | 0 |
| 220 | Spacetime | Ln(Rate) | Malnutrition - poroportion <2SD weight for age (logit transformed), Indoor Air Polluntion (All Cooking Fuels), Smoking Prevalence                                                                                                                 | 0.711972  | 203 | 0.176049  | 243 | 0 |
| 221 | Linear    | Ln(Rate) | Malnutrition - poroportion <2SD weight for age (logit transformed), Indoor Air Polluntion (All Cooking Fuels), Smoking Prevalence, Education (years per capita), Lag distributed income per capita (log transformed)                              | 0.7784564 | 316 | 0.1750853 | 168 | 0 |
| 222 | Spacetime | Ln(Rate) | Malnutrition - poroportion <2SD weight for age (logit transformed), Indoor Air Polluntion (All Cooking Fuels), Smoking Prevalence, Education (years per capita), Lag distributed income per capita (log transformed)                              | 0.7054198 | 187 | 0.1755772 | 213 | 0 |
| 223 | Linear    | Ln(Rate) | Malnutrition - poroportion <2SD weight for age (logit transformed), Indoor Air Polluntion (All Cooking Fuels), Smoking Prevalence, Alcohol (liters per capita)                                                                                    | 0.770356  | 298 | 0.1751358 | 174 | 0 |
| 224 | Spacetime | Ln(Rate) | Malnutrition - poroportion <2SD weight for age (logit transformed), Indoor Air Polluntion (All Cooking Fuels), Smoking Prevalence, Alcohol (liters per capita)                                                                                    | 0.7137794 | 206 | 0.1758846 | 237 | 0 |
| 225 | Linear    | Ln(Rate) | Malnutrition - poroportion <2SD weight for age (logit transformed), Indoor Air Polluntion (All Cooking Fuels), Smoking Prevalence, Alcohol (liters per capita), Education (years per capita), Lag distributed income per capita (log transformed) | 0.7572497 | 275 | 0.1749237 | 159 | 0 |
| 226 | Spacetime | Ln(Rate) | Malnutrition - poroportion <2SD weight for age (logit transformed), Indoor Air Polluntion (All Cooking Fuels), Smoking Prevalence, Alcohol (liters per capita), Education (years per capita), Lag distributed income per capita (log transformed) | 0.69522   | 168 | 0.1755493 | 212 | 0 |
| 227 | Linear    | Ln(Rate) | Health System Access 2 (unitness)                                                                                                                                                                                                                 | 0.8011612 | 333 | 0.1829189 | 347 | 0 |

|     |           |          |                                                                                                                                                                                             |           |     |           |     |   |
|-----|-----------|----------|---------------------------------------------------------------------------------------------------------------------------------------------------------------------------------------------|-----------|-----|-----------|-----|---|
| 228 | Spacetime | Ln(Rate) | Health System Access 2 (unitness)                                                                                                                                                           | 0.7432997 | 251 | 0.1800358 | 329 | 0 |
| 229 | Linear    | Ln(Rate) | Health System Access 2 (unitness), Education (years per capita), Lag distributed income per capita (log transformed)                                                                        | 0.7614017 | 282 | 0.1771094 | 294 | 0 |
| 230 | Spacetime | Ln(Rate) | Health System Access 2 (unitness), Education (years per capita), Lag distributed income per capita (log transformed)                                                                        | 0.7060783 | 189 | 0.1763821 | 266 | 0 |
| 231 | Linear    | Ln(Rate) | Health System Access 2 (unitness), Alcohol (liters per capita)                                                                                                                              | 0.8021601 | 334 | 0.1831306 | 350 | 0 |
| 232 | Spacetime | Ln(Rate) | Health System Access 2 (unitness), Alcohol (liters per capita)                                                                                                                              | 0.7432454 | 250 | 0.1801611 | 332 | 0 |
| 233 | Linear    | Ln(Rate) | Health System Access 2 (unitness), Alcohol (liters per capita), Education (years per capita), Lag distributed income per capita (log transformed)                                           | 0.7356038 | 240 | 0.1770801 | 293 | 0 |
| 234 | Spacetime | Ln(Rate) | Health System Access 2 (unitness), Alcohol (liters per capita), Education (years per capita), Lag distributed income per capita (log transformed)                                           | 0.7048678 | 185 | 0.1764937 | 268 | 0 |
| 235 | Linear    | Ln(Rate) | Health System Access 2 (unitness), Smoking Prevalence                                                                                                                                       | 0.7708038 | 299 | 0.1819732 | 342 | 0 |
| 236 | Spacetime | Ln(Rate) | Health System Access 2 (unitness), Smoking Prevalence                                                                                                                                       | 0.7403119 | 247 | 0.1796597 | 322 | 0 |
| 237 | Linear    | Ln(Rate) | Health System Access 2 (unitness), Smoking Prevalence, Education (years per capita), Lag distributed income per capita (log transformed)                                                    | 0.7431289 | 249 | 0.1767992 | 280 | 0 |
| 238 | Spacetime | Ln(Rate) | Health System Access 2 (unitness), Smoking Prevalence, Education (years per capita), Lag distributed income per capita (log transformed)                                                    | 0.6965069 | 170 | 0.1761446 | 249 | 0 |
| 239 | Linear    | Ln(Rate) | Health System Access 2 (unitness), Smoking Prevalence, Alcohol (liters per capita)                                                                                                          | 0.7729146 | 304 | 0.1821341 | 344 | 0 |
| 240 | Spacetime | Ln(Rate) | Health System Access 2 (unitness), Smoking Prevalence, Alcohol (liters per capita)                                                                                                          | 0.7408845 | 248 | 0.1797972 | 325 | 0 |
| 241 | Linear    | Ln(Rate) | Health System Access 2 (unitness), Smoking Prevalence, Alcohol (liters per capita), Education (years per capita), Lag distributed income per capita (log transformed)                       | 0.7341534 | 237 | 0.176807  | 281 | 0 |
| 242 | Spacetime | Ln(Rate) | Health System Access 2 (unitness), Smoking Prevalence, Alcohol (liters per capita), Education (years per capita), Lag distributed income per capita (log transformed)                       | 0.6986705 | 172 | 0.1763046 | 260 | 0 |
| 243 | Linear    | Ln(Rate) | Health System Access 2 (unitness), Indoor Air Pollution (All Cooking Fuels)                                                                                                                 | 0.7829222 | 320 | 0.180177  | 333 | 0 |
| 244 | Spacetime | Ln(Rate) | Health System Access 2 (unitness), Indoor Air Pollution (All Cooking Fuels)                                                                                                                 | 0.7348819 | 239 | 0.1781564 | 315 | 0 |
| 245 | Linear    | Ln(Rate) | Health System Access 2 (unitness), Indoor Air Pollution (All Cooking Fuels), Education (years per capita), Lag distributed income per capita (log transformed)                              | 0.7667645 | 295 | 0.177281  | 302 | 0 |
| 246 | Spacetime | Ln(Rate) | Health System Access 2 (unitness), Indoor Air Pollution (All Cooking Fuels), Education (years per capita), Lag distributed income per capita (log transformed)                              | 0.709747  | 196 | 0.1762954 | 259 | 0 |
| 247 | Linear    | Ln(Rate) | Health System Access 2 (unitness), Indoor Air Pollution (All Cooking Fuels), Alcohol (liters per capita)                                                                                    | 0.783702  | 321 | 0.1802492 | 334 | 0 |
| 248 | Spacetime | Ln(Rate) | Health System Access 2 (unitness), Indoor Air Pollution (All Cooking Fuels), Alcohol (liters per capita)                                                                                    | 0.7365129 | 244 | 0.1781604 | 316 | 0 |
| 249 | Linear    | Ln(Rate) | Health System Access 2 (unitness), Indoor Air Pollution (All Cooking Fuels), Alcohol (liters per capita), Education (years per capita), Lag distributed income per capita (log transformed) | 0.7447197 | 254 | 0.1771166 | 295 | 0 |

|     |           |          |                                                                                                                                                                                                                      |           |     |           |     |   |
|-----|-----------|----------|----------------------------------------------------------------------------------------------------------------------------------------------------------------------------------------------------------------------|-----------|-----|-----------|-----|---|
| 250 | Spacetime | Ln(Rate) | Health System Access 2 (unitness), Indoor Air Pollution (All Cooking Fuels), Alcohol (liters per capita), Education (years per capita), Lag distributed income per capita (log transformed)                          | 0.7117876 | 202 | 0.1763564 | 263 | 0 |
| 251 | Linear    | Ln(Rate) | Health System Access 2 (unitness), Indoor Air Pollution (All Cooking Fuels), Smoking Prevalence                                                                                                                      | 0.7605447 | 280 | 0.1796072 | 320 | 0 |
| 252 | Spacetime | Ln(Rate) | Health System Access 2 (unitness), Indoor Air Pollution (All Cooking Fuels), Smoking Prevalence                                                                                                                      | 0.7325987 | 232 | 0.177864  | 310 | 0 |
| 253 | Linear    | Ln(Rate) | Health System Access 2 (unitness), Indoor Air Pollution (All Cooking Fuels), Smoking Prevalence, Education (years per capita), Lag distributed income per capita (log transformed)                                   | 0.7534082 | 269 | 0.1769653 | 288 | 0 |
| 254 | Spacetime | Ln(Rate) | Health System Access 2 (unitness), Indoor Air Pollution (All Cooking Fuels), Smoking Prevalence, Education (years per capita), Lag distributed income per capita (log transformed)                                   | 0.7021331 | 178 | 0.1760446 | 242 | 0 |
| 255 | Linear    | Ln(Rate) | Health System Access 2 (unitness), Indoor Air Pollution (All Cooking Fuels), Smoking Prevalence, Alcohol (liters per capita)                                                                                         | 0.758745  | 278 | 0.1796708 | 323 | 0 |
| 256 | Spacetime | Ln(Rate) | Health System Access 2 (unitness), Indoor Air Pollution (All Cooking Fuels), Smoking Prevalence, Alcohol (liters per capita)                                                                                         | 0.7339082 | 236 | 0.1778787 | 311 | 0 |
| 257 | Linear    | Ln(Rate) | Health System Access 2 (unitness), Indoor Air Pollution (All Cooking Fuels), Smoking Prevalence, Alcohol (liters per capita), Education (years per capita), Lag distributed income per capita (log transformed)      | 0.7399195 | 246 | 0.1768504 | 283 | 0 |
| 258 | Spacetime | Ln(Rate) | Health System Access 2 (unitness), Indoor Air Pollution (All Cooking Fuels), Smoking Prevalence, Alcohol (liters per capita), Education (years per capita), Lag distributed income per capita (log transformed)      | 0.7045095 | 184 | 0.1761575 | 250 | 0 |
| 259 | Linear    | Ln(Rate) | Health System Access 2 (unitness), Malnutrition - proportion <2SD weight for age (logit transformed)                                                                                                                 | 0.7617702 | 284 | 0.1753932 | 207 | 0 |
| 260 | Spacetime | Ln(Rate) | Health System Access 2 (unitness), Malnutrition - proportion <2SD weight for age (logit transformed)                                                                                                                 | 0.7167512 | 211 | 0.1766927 | 278 | 0 |
| 261 | Linear    | Ln(Rate) | Health System Access 2 (unitness), Malnutrition - proportion <2SD weight for age (logit transformed), Education (years per capita), Lag distributed income per capita (log transformed)                              | 0.7531524 | 267 | 0.1753239 | 195 | 0 |
| 262 | Spacetime | Ln(Rate) | Health System Access 2 (unitness), Malnutrition - proportion <2SD weight for age (logit transformed), Education (years per capita), Lag distributed income per capita (log transformed)                              | 0.7021768 | 179 | 0.1757924 | 231 | 0 |
| 263 | Linear    | Ln(Rate) | Health System Access 2 (unitness), Malnutrition - proportion <2SD weight for age (logit transformed), Alcohol (liters per capita)                                                                                    | 0.7516105 | 265 | 0.1753471 | 199 | 0 |
| 264 | Spacetime | Ln(Rate) | Health System Access 2 (unitness), Malnutrition - proportion <2SD weight for age (logit transformed), Alcohol (liters per capita)                                                                                    | 0.7082258 | 192 | 0.1766704 | 276 | 0 |
| 265 | Linear    | Ln(Rate) | Health System Access 2 (unitness), Malnutrition - proportion <2SD weight for age (logit transformed), Alcohol (liters per capita), Education (years per capita), Lag distributed income per capita (log transformed) | 0.7346905 | 238 | 0.1752726 | 187 | 0 |
| 266 | Spacetime | Ln(Rate) | Health System Access 2 (unitness), Malnutrition - proportion <2SD weight for age (logit transformed), Alcohol (liters per capita), Education (years per capita), Lag distributed income per capita (log transformed) | 0.6878593 | 160 | 0.1758753 | 235 | 0 |

|     |           |          |                                                                                                                                                                                                                                                                |           |     |           |     |   |
|-----|-----------|----------|----------------------------------------------------------------------------------------------------------------------------------------------------------------------------------------------------------------------------------------------------------------|-----------|-----|-----------|-----|---|
| 267 | Linear    | Ln(Rate) | Health System Access 2 (unitness), Malnutrition - proportion <2SD weight for age (logit transformed), Smoking Prevalence                                                                                                                                       | 0.7571113 | 274 | 0.1753909 | 206 | 0 |
| 268 | Spacetime | Ln(Rate) | Health System Access 2 (unitness), Malnutrition - proportion <2SD weight for age (logit transformed), Smoking Prevalence                                                                                                                                       | 0.7068225 | 190 | 0.1765555 | 270 | 0 |
| 269 | Linear    | Ln(Rate) | Health System Access 2 (unitness), Malnutrition - proportion <2SD weight for age (logit transformed), Smoking Prevalence, Education (years per capita), Lag distributed income per capita (log transformed)                                                    | 0.7487134 | 260 | 0.1753082 | 192 | 0 |
| 270 | Spacetime | Ln(Rate) | Health System Access 2 (unitness), Malnutrition - proportion <2SD weight for age (logit transformed), Smoking Prevalence, Education (years per capita), Lag distributed income per capita (log transformed)                                                    | 0.7017742 | 176 | 0.1756337 | 220 | 0 |
| 271 | Linear    | Ln(Rate) | Health System Access 2 (unitness), Malnutrition - proportion <2SD weight for age (logit transformed), Smoking Prevalence, Alcohol (liters per capita)                                                                                                          | 0.7503185 | 261 | 0.1753441 | 198 | 0 |
| 272 | Spacetime | Ln(Rate) | Health System Access 2 (unitness), Malnutrition - proportion <2SD weight for age (logit transformed), Smoking Prevalence, Alcohol (liters per capita)                                                                                                          | 0.7020365 | 177 | 0.1765483 | 269 | 0 |
| 273 | Linear    | Ln(Rate) | Health System Access 2 (unitness), Malnutrition - proportion <2SD weight for age (logit transformed), Smoking Prevalence, Alcohol (liters per capita), Education (years per capita), Lag distributed income per capita (log transformed)                       | 0.7334803 | 234 | 0.175243  | 185 | 0 |
| 274 | Spacetime | Ln(Rate) | Health System Access 2 (unitness), Malnutrition - proportion <2SD weight for age (logit transformed), Smoking Prevalence, Alcohol (liters per capita), Education (years per capita), Lag distributed income per capita (log transformed)                       | 0.6882305 | 161 | 0.1757632 | 229 | 0 |
| 275 | Linear    | Ln(Rate) | Health System Access 2 (unitness), Malnutrition - proportion <2SD weight for age (logit transformed), Indoor Air Pollution (All Cooking Fuels)                                                                                                                 | 0.7764699 | 312 | 0.1753248 | 196 | 0 |
| 276 | Spacetime | Ln(Rate) | Health System Access 2 (unitness), Malnutrition - proportion <2SD weight for age (logit transformed), Indoor Air Pollution (All Cooking Fuels)                                                                                                                 | 0.7205243 | 219 | 0.176432  | 267 | 0 |
| 277 | Linear    | Ln(Rate) | Health System Access 2 (unitness), Malnutrition - proportion <2SD weight for age (logit transformed), Indoor Air Pollution (All Cooking Fuels), Education (years per capita), Lag distributed income per capita (log transformed)                              | 0.7685915 | 297 | 0.1754184 | 209 | 0 |
| 278 | Spacetime | Ln(Rate) | Health System Access 2 (unitness), Malnutrition - proportion <2SD weight for age (logit transformed), Indoor Air Pollution (All Cooking Fuels), Education (years per capita), Lag distributed income per capita (log transformed)                              | 0.7054278 | 188 | 0.1757608 | 228 | 0 |
| 279 | Linear    | Ln(Rate) | Health System Access 2 (unitness), Malnutrition - proportion <2SD weight for age (logit transformed), Indoor Air Pollution (All Cooking Fuels), Alcohol (liters per capita)                                                                                    | 0.7553004 | 271 | 0.1752907 | 189 | 0 |
| 280 | Spacetime | Ln(Rate) | Health System Access 2 (unitness), Malnutrition - proportion <2SD weight for age (logit transformed), Indoor Air Pollution (All Cooking Fuels), Alcohol (liters per capita)                                                                                    | 0.7127292 | 204 | 0.1763709 | 264 | 0 |
| 281 | Linear    | Ln(Rate) | Health System Access 2 (unitness), Malnutrition - proportion <2SD weight for age (logit transformed), Indoor Air Pollution (All Cooking Fuels), Alcohol (liters per capita), Education (years per capita), Lag distributed income per capita (log transformed) | 0.7532427 | 268 | 0.1752978 | 190 | 0 |



|     |           |          |                                                                                                                                                                                                                                                                                    |           |     |           |     |   |
|-----|-----------|----------|------------------------------------------------------------------------------------------------------------------------------------------------------------------------------------------------------------------------------------------------------------------------------------|-----------|-----|-----------|-----|---|
| 282 | Spacetime | Ln(Rate) | Health System Access 2 (unitness), Malnutrition - proportion <2SD weight for age (logit transformed), Indoor Air Pollution (All Cooking Fuels), Alcohol (liters per capita), Education (years per capita), Lag distributed income per capita (log transformed)                     | 0.6904384 | 163 | 0.1758094 | 232 | 0 |
| 283 | Linear    | Ln(Rate) | Health System Access 2 (unitness), Malnutrition - proportion <2SD weight for age (logit transformed), Indoor Air Pollution (All Cooking Fuels), Smoking Prevalence                                                                                                                 | 0.7711259 | 300 | 0.1753232 | 194 | 0 |
| 284 | Spacetime | Ln(Rate) | Health System Access 2 (unitness), Malnutrition - proportion <2SD weight for age (logit transformed), Indoor Air Pollution (All Cooking Fuels), Smoking Prevalence                                                                                                                 | 0.7107685 | 199 | 0.1762953 | 258 | 0 |
| 285 | Linear    | Ln(Rate) | Health System Access 2 (unitness), Malnutrition - proportion <2SD weight for age (logit transformed), Indoor Air Pollution (All Cooking Fuels), Smoking Prevalence, Education (years per capita), Lag distributed income per capita (log transformed)                              | 0.7632225 | 286 | 0.1753818 | 205 | 0 |
| 286 | Spacetime | Ln(Rate) | Health System Access 2 (unitness), Malnutrition - proportion <2SD weight for age (logit transformed), Indoor Air Pollution (All Cooking Fuels), Smoking Prevalence, Education (years per capita), Lag distributed income per capita (log transformed)                              | 0.7003623 | 175 | 0.1755934 | 215 | 0 |
| 287 | Linear    | Ln(Rate) | Health System Access 2 (unitness), Malnutrition - proportion <2SD weight for age (logit transformed), Indoor Air Pollution (All Cooking Fuels), Smoking Prevalence, Alcohol (liters per capita)                                                                                    | 0.7520313 | 266 | 0.175289  | 188 | 0 |
| 288 | Spacetime | Ln(Rate) | Health System Access 2 (unitness), Malnutrition - proportion <2SD weight for age (logit transformed), Indoor Air Pollution (All Cooking Fuels), Smoking Prevalence, Alcohol (liters per capita)                                                                                    | 0.702721  | 181 | 0.1762525 | 256 | 0 |
| 289 | Linear    | Ln(Rate) | Health System Access 2 (unitness), Malnutrition - proportion <2SD weight for age (logit transformed), Indoor Air Pollution (All Cooking Fuels), Smoking Prevalence, Alcohol (liters per capita), Education (years per capita), Lag distributed income per capita (log transformed) | 0.7503575 | 262 | 0.175272  | 186 | 0 |
| 290 | Spacetime | Ln(Rate) | Health System Access 2 (unitness), Malnutrition - proportion <2SD weight for age (logit transformed), Indoor Air Pollution (All Cooking Fuels), Smoking Prevalence, Alcohol (liters per capita), Education (years per capita), Lag distributed income per capita (log transformed) | 0.6883399 | 162 | 0.1756866 | 223 | 0 |
| 291 | Linear    | Ln(Rate) | Cumulative Cigarettes (5 Years)                                                                                                                                                                                                                                                    | 0.9774417 | 354 | 0.1869309 | 354 | 0 |
| 292 | Spacetime | Ln(Rate) | Cumulative Cigarettes (5 Years)                                                                                                                                                                                                                                                    | 0.8394018 | 344 | 0.1829973 | 348 | 0 |
| 293 | Linear    | Ln(Rate) | Cumulative Cigarettes (5 Years), Education (years per capita), Lag distributed income per capita (log transformed)                                                                                                                                                                 | 0.8271533 | 340 | 0.1773345 | 304 | 0 |
| 294 | Spacetime | Ln(Rate) | Cumulative Cigarettes (5 Years), Education (years per capita), Lag distributed income per capita (log transformed)                                                                                                                                                                 | 0.7484338 | 259 | 0.1772721 | 301 | 0 |
| 295 | Linear    | Ln(Rate) | Cumulative Cigarettes (5 Years), Alcohol (liters per capita)                                                                                                                                                                                                                       | 0.9740766 | 353 | 0.1864473 | 353 | 0 |
| 296 | Spacetime | Ln(Rate) | Cumulative Cigarettes (5 Years), Alcohol (liters per capita)                                                                                                                                                                                                                       | 0.8360332 | 343 | 0.1828138 | 346 | 0 |
| 297 | Linear    | Ln(Rate) | Cumulative Cigarettes (5 Years), Alcohol (liters per capita), Education (years per capita), Lag distributed income per capita (log transformed)                                                                                                                                    | 0.7791402 | 317 | 0.1772638 | 300 | 0 |
| 298 | Spacetime | Ln(Rate) | Cumulative Cigarettes (5 Years), Alcohol (liters per capita), Education (years per capita), Lag distributed income per capita (log transformed)                                                                                                                                    | 0.7158297 | 210 | 0.1767849 | 279 | 0 |

|     |           |          |                                                                                                                                                                                                                    |           |     |           |     |   |
|-----|-----------|----------|--------------------------------------------------------------------------------------------------------------------------------------------------------------------------------------------------------------------|-----------|-----|-----------|-----|---|
| 299 | Linear    | Ln(Rate) | Cumulative Cigarettes (5 Years), Indoor Air Pollution (All Cooking Fuels)                                                                                                                                          | 0.8940675 | 348 | 0.181914  | 340 | 0 |
| 300 | Spacetime | Ln(Rate) | Cumulative Cigarettes (5 Years), Indoor Air Pollution (All Cooking Fuels)                                                                                                                                          | 0.8058109 | 336 | 0.1797802 | 324 | 0 |
| 301 | Linear    | Ln(Rate) | Cumulative Cigarettes (5 Years), Indoor Air Pollution (All Cooking Fuels), Education (years per capita), Lag distributed income per capita (log transformed)                                                       | 0.8280545 | 341 | 0.1772969 | 303 | 0 |
| 302 | Spacetime | Ln(Rate) | Cumulative Cigarettes (5 Years), Indoor Air Pollution (All Cooking Fuels), Education (years per capita), Lag distributed income per capita (log transformed)                                                       | 0.7473947 | 256 | 0.17707   | 291 | 0 |
| 303 | Linear    | Ln(Rate) | Cumulative Cigarettes (5 Years), Indoor Air Pollution (All Cooking Fuels), Alcohol (liters per capita)                                                                                                             | 0.8826818 | 347 | 0.1812827 | 337 | 0 |
| 304 | Spacetime | Ln(Rate) | Cumulative Cigarettes (5 Years), Indoor Air Pollution (All Cooking Fuels), Alcohol (liters per capita)                                                                                                             | 0.7932955 | 327 | 0.1794611 | 319 | 0 |
| 305 | Linear    | Ln(Rate) | Cumulative Cigarettes (5 Years), Indoor Air Pollution (All Cooking Fuels), Alcohol (liters per capita), Education (years per capita), Lag distributed income per capita (log transformed)                          | 0.7778224 | 314 | 0.1772354 | 299 | 0 |
| 306 | Spacetime | Ln(Rate) | Cumulative Cigarettes (5 Years), Indoor Air Pollution (All Cooking Fuels), Alcohol (liters per capita), Education (years per capita), Lag distributed income per capita (log transformed)                          | 0.7272575 | 229 | 0.176558  | 271 | 0 |
| 307 | Linear    | Ln(Rate) | Cumulative Cigarettes (5 Years), Malnutrition - proportion <2SD weight for age (logit transformed)                                                                                                                 | 0.7758464 | 310 | 0.1752026 | 179 | 0 |
| 308 | Spacetime | Ln(Rate) | Cumulative Cigarettes (5 Years), Malnutrition - proportion <2SD weight for age (logit transformed)                                                                                                                 | 0.7183508 | 216 | 0.1760085 | 240 | 0 |
| 309 | Linear    | Ln(Rate) | Cumulative Cigarettes (5 Years), Malnutrition - proportion <2SD weight for age (logit transformed), Education (years per capita), Lag distributed income per capita (log transformed)                              | 0.7640032 | 287 | 0.1750596 | 166 | 0 |
| 310 | Spacetime | Ln(Rate) | Cumulative Cigarettes (5 Years), Malnutrition - proportion <2SD weight for age (logit transformed), Education (years per capita), Lag distributed income per capita (log transformed)                              | 0.7103578 | 198 | 0.1757131 | 225 | 0 |
| 311 | Linear    | Ln(Rate) | Cumulative Cigarettes (5 Years), Malnutrition - proportion <2SD weight for age (logit transformed), Alcohol (liters per capita)                                                                                    | 0.7647547 | 288 | 0.1751352 | 173 | 0 |
| 312 | Spacetime | Ln(Rate) | Cumulative Cigarettes (5 Years), Malnutrition - proportion <2SD weight for age (logit transformed), Alcohol (liters per capita)                                                                                    | 0.7209538 | 223 | 0.175826  | 233 | 0 |
| 313 | Linear    | Ln(Rate) | Cumulative Cigarettes (5 Years), Malnutrition - proportion <2SD weight for age (logit transformed), Alcohol (liters per capita), Education (years per capita), Lag distributed income per capita (log transformed) | 0.7478431 | 258 | 0.1749235 | 158 | 0 |
| 314 | Spacetime | Ln(Rate) | Cumulative Cigarettes (5 Years), Malnutrition - proportion <2SD weight for age (logit transformed), Alcohol (liters per capita), Education (years per capita), Lag distributed income per capita (log transformed) | 0.6953373 | 169 | 0.1756531 | 221 | 0 |
| 315 | Linear    | Ln(Rate) | Cumulative Cigarettes (5 Years), Malnutrition - proportion <2SD weight for age (logit transformed), Indoor Air Pollution (All Cooking Fuels)                                                                       | 0.791119  | 326 | 0.1751974 | 178 | 0 |
| 316 | Spacetime | Ln(Rate) | Cumulative Cigarettes (5 Years), Malnutrition - proportion <2SD weight for age (logit transformed), Indoor Air Pollution (All Cooking Fuels)                                                                       | 0.7233111 | 227 | 0.1760732 | 245 | 0 |

|     |           |          |                                                                                                                                                                                                                                                           |           |     |           |     |   |
|-----|-----------|----------|-----------------------------------------------------------------------------------------------------------------------------------------------------------------------------------------------------------------------------------------------------------|-----------|-----|-----------|-----|---|
| 317 | Linear    | Ln(Rate) | Cumulative Cigarettes (5 Years), Malnutrition - proportion <2SD weight for age (logit transformed), Indoor Air Pollution (All Cooking Fuels), Education (years per capita), Lag distributed income per capita (log transformed)                           | 0.7839519 | 322 | 0.1750799 | 167 | 0 |
| 318 | Spacetime | Ln(Rate) | Cumulative Cigarettes (5 Years), Malnutrition - proportion <2SD weight for age (logit transformed), Indoor Air Pollution (All Cooking Fuels), Education (years per capita), Lag distributed income per capita (log transformed)                           | 0.7213597 | 224 | 0.1756795 | 222 | 0 |
| 319 | Linear    | Ln(Rate) | Cumulative Cigarettes (5 Years), Malnutrition - proportion <2SD weight for age (logit transformed), Indoor Air Pollution (All Cooking Fuels), Alcohol (liters per capita)                                                                                 | 0.7743682 | 306 | 0.175139  | 176 | 0 |
| 320 | Spacetime | Ln(Rate) | Cumulative Cigarettes (5 Years), Malnutrition - proportion <2SD weight for age (logit transformed), Indoor Air Pollution (All Cooking Fuels), Alcohol (liters per capita)                                                                                 | 0.717223  | 214 | 0.175876  | 236 | 0 |
| 321 | Linear    | Ln(Rate) | Cumulative Cigarettes (5 Years), Malnutrition - proportion <2SD weight for age (logit transformed), Indoor Air Pollution (All Cooking Fuels), Malnutrition - proportion <2SD weight for age (logit transformed), Indoor Air Pollution (All Cooking Fuels) | 0.7586286 | 277 | 0.1749325 | 163 | 0 |
| 322 | Spacetime | Ln(Rate) | Cumulative Cigarettes (5 Years), Malnutrition - proportion <2SD weight for age (logit transformed), Indoor Air Pollution (All Cooking Fuels), Malnutrition - proportion <2SD weight for age (logit transformed), Indoor Air Pollution (All Cooking Fuels) | 0.7080641 | 191 | 0.1755787 | 214 | 0 |
| 323 | Linear    | Ln(Rate) | Cumulative Cigarettes (5 Years), Health System Access 2 (unitness)                                                                                                                                                                                        | 0.7980312 | 330 | 0.1827743 | 345 | 0 |
| 324 | Spacetime | Ln(Rate) | Cumulative Cigarettes (5 Years), Health System Access 2 (unitness)                                                                                                                                                                                        | 0.7435583 | 253 | 0.1799924 | 327 | 0 |
| 325 | Linear    | Ln(Rate) | Cumulative Cigarettes (5 Years), Health System Access 2 (unitness), Lag distributed income per capita (log transformed)                                                                                                                                   | 0.7655262 | 291 | 0.177676  | 308 | 0 |
| 326 | Spacetime | Ln(Rate) | Cumulative Cigarettes (5 Years), Health System Access 2 (unitness), Lag distributed income per capita (log transformed)                                                                                                                                   | 0.7114833 | 201 | 0.1769271 | 286 | 0 |
| 327 | Linear    | Ln(Rate) | Cumulative Cigarettes (5 Years), Health System Access 2 (unitness), Alcohol (liters per capita)                                                                                                                                                           | 0.8007963 | 332 | 0.1830267 | 349 | 0 |
| 328 | Spacetime | Ln(Rate) | Cumulative Cigarettes (5 Years), Health System Access 2 (unitness), Alcohol (liters per capita)                                                                                                                                                           | 0.7434803 | 252 | 0.1801172 | 330 | 0 |
| 329 | Linear    | Ln(Rate) | Cumulative Cigarettes (5 Years), Health System Access 2 (unitness), Alcohol (liters per capita), Lag distributed income per capita (log transformed)                                                                                                      | 0.7604757 | 279 | 0.1778369 | 309 | 0 |
| 330 | Spacetime | Ln(Rate) | Cumulative Cigarettes (5 Years), Health System Access 2 (unitness), Alcohol (liters per capita), Lag distributed income per capita (log transformed)                                                                                                      | 0.6992214 | 173 | 0.1770751 | 292 | 0 |
| 331 | Linear    | Ln(Rate) | Cumulative Cigarettes (5 Years), Health System Access 2 (unitness), Indoor Air Pollution (All Cooking Fuels)                                                                                                                                              | 0.7750004 | 307 | 0.1800118 | 328 | 0 |
| 332 | Spacetime | Ln(Rate) | Cumulative Cigarettes (5 Years), Health System Access 2 (unitness), Indoor Air Pollution (All Cooking Fuels)                                                                                                                                              | 0.7357185 | 241 | 0.1780843 | 313 | 0 |
| 333 | Linear    | Ln(Rate) | Cumulative Cigarettes (5 Years), Health System Access 2 (unitness), Indoor Air Pollution (All Cooking Fuels), Education (years per capita), Lag distributed income per capita (log transformed)                                                           | 0.7615894 | 283 | 0.1771683 | 296 | 0 |
| 334 | Spacetime | Ln(Rate) | Cumulative Cigarettes (5 Years), Health System Access 2 (unitness), Indoor Air Pollution (All Cooking Fuels), Education (years per capita), Lag distributed income per capita (log transformed)                                                           | 0.7146927 | 208 | 0.176253  | 257 | 0 |
| 335 | Linear    | Ln(Rate) | Cumulative Cigarettes (5 Years), Health System Access 2 (unitness), Indoor Air Pollution (All Cooking Fuels), Alcohol (liters per capita)                                                                                                                 | 0.7782307 | 315 | 0.1801415 | 331 | 0 |
| 336 | Spacetime | Ln(Rate) | Cumulative Cigarettes (5 Years), Health System Access 2 (unitness), Indoor Air Pollution (All Cooking Fuels), Alcohol (liters per capita)                                                                                                                 | 0.7373447 | 245 | 0.1780889 | 314 | 0 |
| 337 | Linear    | Ln(Rate) | Cumulative Cigarettes (5 Years), Health System Access 2 (unitness), Indoor Air Pollution (All Cooking Fuels), Alcohol (liters per capita), Lag distributed income per capita (log transformed)                                                            | 0.7667912 | 296 | 0.1779643 | 312 | 0 |

|     |           |          |                                                                                                                                                                                                                                                                    |           |     |           |     |   |
|-----|-----------|----------|--------------------------------------------------------------------------------------------------------------------------------------------------------------------------------------------------------------------------------------------------------------------|-----------|-----|-----------|-----|---|
| 338 | Spacetime | Ln(Rate) | Cumulative Cigarettes (5 Years), Health System Access 2 (unitness), Indoor Air Pollution (All Cooking Fuels), Alcohol (liters per capita), Lag distributed income per capita (log transformed)                                                                     | 0.7082723 | 193 | 0.176847  | 282 | 0 |
| 339 | Linear    | Ln(Rate) | Cumulative Cigarettes (5 Years), Health System Access 2 (unitness), Malnutrition - proportion <2SD weight for age (logit transformed)                                                                                                                              | 0.7576022 | 276 | 0.1753714 | 204 | 0 |
| 340 | Spacetime | Ln(Rate) | Cumulative Cigarettes (5 Years), Health System Access 2 (unitness), Malnutrition - proportion <2SD weight for age (logit transformed)                                                                                                                              | 0.7171739 | 212 | 0.1766435 | 274 | 0 |
| 341 | Linear    | Ln(Rate) | Cumulative Cigarettes (5 Years), Health System Access 2 (unitness), Malnutrition - proportion <2SD weight for age (logit transformed), Lag distributed income per capita (log transformed)                                                                         | 0.7562107 | 272 | 0.1753254 | 197 | 0 |
| 342 | Spacetime | Ln(Rate) | Cumulative Cigarettes (5 Years), Health System Access 2 (unitness), Malnutrition - proportion <2SD weight for age (logit transformed), Lag distributed income per capita (log transformed)                                                                         | 0.703081  | 182 | 0.176134  | 248 | 0 |
| 343 | Linear    | Ln(Rate) | Cumulative Cigarettes (5 Years), Health System Access 2 (unitness), Malnutrition - proportion <2SD weight for age (logit transformed), Alcohol (liters per capita)                                                                                                 | 0.7509882 | 264 | 0.1753596 | 202 | 0 |
| 344 | Spacetime | Ln(Rate) | Cumulative Cigarettes (5 Years), Health System Access 2 (unitness), Malnutrition - proportion <2SD weight for age (logit transformed), Alcohol (liters per capita)                                                                                                 | 0.7083781 | 194 | 0.176623  | 273 | 0 |
| 345 | Linear    | Ln(Rate) | Cumulative Cigarettes (5 Years), Health System Access 2 (unitness), Malnutrition - proportion <2SD weight for age (logit transformed), Alcohol (liters per capita), Lag distributed income per capita (log transformed)                                            | 0.7564822 | 273 | 0.1753523 | 201 | 0 |
| 346 | Spacetime | Ln(Rate) | Cumulative Cigarettes (5 Years), Health System Access 2 (unitness), Malnutrition - proportion <2SD weight for age (logit transformed), Alcohol (liters per capita), Lag distributed income per capita (log transformed)                                            | 0.7027041 | 180 | 0.1762195 | 255 | 0 |
| 347 | Linear    | Ln(Rate) | Cumulative Cigarettes (5 Years), Health System Access 2 (unitness), Malnutrition - proportion <2SD weight for age (logit transformed), Indoor Air Pollution (All Cooking Fuels)                                                                                    | 0.7723057 | 302 | 0.1753126 | 193 | 0 |
| 348 | Spacetime | Ln(Rate) | Cumulative Cigarettes (5 Years), Health System Access 2 (unitness), Malnutrition - proportion <2SD weight for age (logit transformed), Indoor Air Pollution (All Cooking Fuels)                                                                                    | 0.720533  | 220 | 0.176372  | 265 | 0 |
| 349 | Linear    | Ln(Rate) | Cumulative Cigarettes (5 Years), Health System Access 2 (unitness), Malnutrition - proportion <2SD weight for age (logit transformed), Indoor Air Pollution (All Cooking Fuels), Education (years per capita), Lag distributed income per capita (log transformed) | 0.765276  | 289 | 0.1754018 | 208 | 0 |
| 350 | Spacetime | Ln(Rate) | Cumulative Cigarettes (5 Years), Health System Access 2 (unitness), Malnutrition - proportion <2SD weight for age (logit transformed), Indoor Air Pollution (All Cooking Fuels), Education (years per capita), Lag distributed income per capita (log transformed) | 0.7087311 | 195 | 0.1757314 | 226 | 0 |
| 351 | Linear    | Ln(Rate) | Cumulative Cigarettes (5 Years), Health System Access 2 (unitness), Malnutrition - proportion <2SD weight for age (logit transformed), Indoor Air Pollution (All Cooking Fuels), Alcohol (liters per capita)                                                       | 0.754915  | 270 | 0.1753067 | 191 | 0 |

|     |           |          |                                                                                                                                                                                                                                                                   |           |     |           |     |   |
|-----|-----------|----------|-------------------------------------------------------------------------------------------------------------------------------------------------------------------------------------------------------------------------------------------------------------------|-----------|-----|-----------|-----|---|
| 352 | Spacetime | Ln(Rate) | Cumulative Cigarettes (5 Years), Health System Access 2 (unitness), Malnutrition - proportion <2SD weight for age (logit transformed), Indoor Air Pollution (All Cooking Fuels), Alcohol (liters per capita)                                                      | 0.7128524 | 205 | 0.1763129 | 261 | 0 |
| 353 | Linear    | Ln(Rate) | Cumulative Cigarettes (5 Years), Health System Access 2 (unitness), Malnutrition - proportion <2SD weight for age (logit transformed), Indoor Air Pollution (All Cooking Fuels), Alcohol (liters per capita), Lag distributed income per capita (log transformed) | 0.7726222 | 303 | 0.1754505 | 210 | 0 |
| 354 | Spacetime | Ln(Rate) | Cumulative Cigarettes (5 Years), Health System Access 2 (unitness), Malnutrition - proportion <2SD weight for age (logit transformed), Indoor Air Pollution (All Cooking Fuels), Alcohol (liters per capita), Lag distributed income per capita (log transformed) | 0.7033194 | 183 | 0.1760971 | 246 | 0 |

**Appendix Table 6b: CODEm sub-model performance for tuberculosis - Females**

| Overall Rank | Model type | Dependent variable | Covariates                                                                                                                                                                                                                    | Root Mean Squared Error |      | Trend Test |      | Draws |
|--------------|------------|--------------------|-------------------------------------------------------------------------------------------------------------------------------------------------------------------------------------------------------------------------------|-------------------------|------|------------|------|-------|
|              |            |                    |                                                                                                                                                                                                                               | Test 1                  | Rank | Test 1     | Rank |       |
| 1            | Spacetime  | Logit(CF)          | Health System Access 2 (unitless), Malnutrition - proportion <2SD weight for age (logit transformed), Indoor Air Pollution (All Cooking Fuels), Alcohol (liters per capita), Education (years per capita)                     | 1.080079                | 6    | 0.570125   | 1    | 91    |
| 2            | Spacetime  | Logit(CF)          | Health System Access 2 (unitless), Malnutrition - proportion <2SD weight for age (logit transformed), Indoor Air Pollution (All Cooking Fuels), Alcohol (liters per capita)                                                   | 1.080779                | 7    | 0.5702222  | 7    | 83    |
| 3            | Spacetime  | Logit(CF)          | Health System Access 2 (unitless), Malnutrition - proportion <2SD weight for age (logit transformed), Alcohol (liters per capita), Education (years per capita), Lag distributed income per capita (log transformed)          | 1.078773                | 5    | 0.5702371  | 11   | 75    |
| 4            | Spacetime  | Logit(CF)          | Health System Access 2 (unitless), Malnutrition - proportion <2SD weight for age (logit transformed), Indoor Air Pollution (All Cooking Fuels), Smoking Prevalence, Alcohol (liters per capita), Education (years per capita) | 1.083423                | 19   | 0.5701356  | 2    | 68    |
| 5            | Spacetime  | Logit(CF)          | Health System Access 2 (unitless), Indoor Air Pollution (All Cooking Fuels), Smoking Prevalence, Education (years per capita), Lag distributed income per capita (log transformed)                                            | 1.082304                | 11   | 0.5702741  | 16   | 62    |
| 6            | Spacetime  | Logit(CF)          | Health System Access 2 (unitless), Malnutrition - proportion <2SD weight for age (logit transformed), Indoor Air Pollution (All Cooking Fuels), Education (years per capita)                                                  | 1.08371                 | 22   | 0.5702243  | 8    | 56    |
| 7            | Spacetime  | Logit(CF)          | Health System Access 2 (unitless), Malnutrition - proportion <2SD weight for age (logit transformed), Education (years per capita), Lag distributed income per capita (log transformed)                                       | 1.083056                | 17   | 0.5703178  | 24   | 51    |
| 8            | Spacetime  | Logit(CF)          | Health System Access 2 (unitless), Indoor Air Pollution (All Cooking Fuels), Smoking Prevalence                                                                                                                               | 1.082174                | 9    | 0.57037    | 34   | 47    |
| 9            | Spacetime  | Logit(CF)          | Health System Access 2 (unitless), Indoor Air Pollution (All Cooking Fuels), Smoking Prevalence, Alcohol (liters per capita), Education (years per capita), Lag distributed income per capita (log transformed)               | 1.088819                | 41   | 0.5701735  | 4    | 42    |
| 10           | Spacetime  | Logit(CF)          | Health System Access 2 (unitless), Indoor Air Pollution (All Cooking Fuels), Education (years per capita), Lag distributed income per capita (log transformed)                                                                | 1.08448                 | 28   | 0.5702778  | 17   | 39    |
| 11           | Spacetime  | Logit(CF)          | Health System Access 2 (unitless), Indoor Air Pollution (All Cooking Fuels)                                                                                                                                                   | 1.08276                 | 13   | 0.5703696  | 33   | 35    |
| 12           | Spacetime  | Logit(CF)          | Health System Access 2 (unitless), Malnutrition - proportion <2SD weight for age (logit transformed), Indoor Air Pollution (All Cooking Fuels)                                                                                | 1.085086                | 32   | 0.5702565  | 14   | 32    |
| 13           | Spacetime  | Logit(CF)          | Health System Access 2 (unitless), Malnutrition - proportion <2SD weight for age (logit transformed), Alcohol (liters per capita)                                                                                             | 1.074759                | 1    | 0.570427   | 49   | 29    |
| 14           | Spacetime  | Logit(CF)          | Health System Access 2 (unitless), Malnutrition - proportion <2SD weight for age (logit transformed)                                                                                                                          | 1.074921                | 2    | 0.5704388  | 51   | 26    |

|    |           |           |                                                                                                                                                                                                                                                      |          |    |           |    |    |
|----|-----------|-----------|------------------------------------------------------------------------------------------------------------------------------------------------------------------------------------------------------------------------------------------------------|----------|----|-----------|----|----|
| 15 | Spacetime | Logit(CF) | Health System Access 2 (unitless), Malnutrition - proportion <2SD weight for age (logit transformed), Smoking Prevalence, Alcohol (liters per capita), Education (years per capita), Lag distributed income per capita (log transformed)             | 1.088655 | 40 | 0.570247  | 13 | 24 |
| 16 | Spacetime | Logit(CF) | Health System Access 2 (unitless), Malnutrition - proportion <2SD weight for age (logit transformed), Indoor Air Pollution (All Cooking Fuels), Smoking Prevalence, Alcohol (liters per capita)                                                      | 1.089024 | 43 | 0.5702325 | 10 | 22 |
| 17 | Spacetime | Logit(CF) | Health System Access 2 (unitless), Indoor Air Pollution (All Cooking Fuels), Smoking Prevalence, Alcohol (liters per capita)                                                                                                                         | 1.083883 | 24 | 0.5703448 | 29 | 20 |
| 18 | Spacetime | Logit(CF) | Health System Access 2 (unitless), Malnutrition - proportion <2SD weight for age (logit transformed), Smoking Prevalence, Alcohol (liters per capita)                                                                                                | 1.07587  | 3  | 0.5704357 | 50 | 18 |
| 19 | Spacetime | Logit(CF) | Health System Access 2 (unitless), Alcohol (liters per capita), Education (years per capita), Lag distributed income per capita (log transformed)                                                                                                    | 1.086486 | 35 | 0.5702954 | 19 | 16 |
| 20 | Spacetime | Logit(CF) | Health System Access 2 (unitless), Malnutrition - proportion <2SD weight for age (logit transformed), Indoor Air Pollution (All Cooking Fuels), Smoking Prevalence, Alcohol (liters per capita), Lag distributed income per capita (log transformed) | 1.088951 | 42 | 0.5702402 | 12 | 15 |
| 21 | Spacetime | Logit(CF) | Health System Access 2 (unitless), Indoor Air Pollution (All Cooking Fuels), Alcohol (liters per capita)                                                                                                                                             | 1.084079 | 26 | 0.5703368 | 28 | 14 |
| 22 | Spacetime | Logit(CF) | Health System Access 2 (unitless), Malnutrition - proportion <2SD weight for age (logit transformed), Smoking Prevalence                                                                                                                             | 1.076947 | 4  | 0.5704424 | 53 | 12 |
| 23 | Spacetime | Logit(CF) | Health System Access 2 (unitless), Indoor Air Pollution (All Cooking Fuels), Alcohol (liters per capita), Education (years per capita), Lag distributed income per capita (log transformed)                                                          | 1.090899 | 55 | 0.570165  | 3  | 11 |
| 24 | linear    | Logit(CF) | Health System Access 2 (unitless), Malnutrition - proportion <2SD weight for age (logit transformed), Indoor Air Pollution (All Cooking Fuels)                                                                                                       | 1.083865 | 23 | 0.5703855 | 38 | 10 |
| 25 | Spacetime | Logit(CF) | Health System Access 2 (unitless), Malnutrition - proportion <2SD weight for age (logit transformed), Smoking Prevalence, Education (years per capita), Lag distributed income per capita (log transformed)                                          | 1.088455 | 38 | 0.5703198 | 25 | 9  |
| 26 | linear    | Logit(CF) | Health System Access 2 (unitless), Malnutrition - proportion <2SD weight for age (logit transformed), Indoor Air Pollution (All Cooking Fuels), Education (years per capita)                                                                         | 1.084552 | 30 | 0.5703762 | 35 | 8  |
| 27 | linear    | Logit(CF) | Health System Access 2 (unitless), Malnutrition - proportion <2SD weight for age (logit transformed), Indoor Air Pollution (All Cooking Fuels), Alcohol (liters per capita)                                                                          | 1.083176 | 18 | 0.5704087 | 46 | 8  |
| 28 | linear    | Logit(CF) | Health System Access 2 (unitless), Malnutrition - proportion <2SD weight for age (logit transformed), Indoor Air Pollution (All Cooking Fuels), Smoking Prevalence, Education (years per capita)                                                     | 1.086184 | 34 | 0.5703644 | 32 | 7  |
| 29 | linear    | Logit(CF) | Health System Access 2 (unitless), Malnutrition - proportion <2SD weight for age (logit transformed), Indoor Air Pollution (All Cooking Fuels), Alcohol (liters per capita), Education (years per capita)                                            | 1.084309 | 27 | 0.5703863 | 40 | 6  |
| 30 | linear    | Logit(CF) | Health System Access 2 (unitless), Malnutrition - proportion <2SD weight for age (logit transformed), Indoor Air Pollution (All Cooking Fuels), Smoking Prevalence                                                                                   | 1.085021 | 31 | 0.5703786 | 36 | 6  |
| 31 | linear    | Logit(CF) | Health System Access 2 (unitless), Malnutrition - proportion <2SD weight for age (logit transformed), Indoor Air Pollution (All Cooking Fuels), Smoking Prevalence, Alcohol (liters per capita), Lag distributed income per capita (log transformed) | 1.083885 | 25 | 0.5704004 | 43 | 5  |
| 32 | linear    | Logit(CF) | Health System Access 2 (unitless), Malnutrition - proportion <2SD weight for age (logit transformed), Indoor Air Pollution (All Cooking Fuels), Smoking Prevalence, Alcohol (liters per capita), Education (years per capita)                        | 1.085934 | 33 | 0.5703828 | 37 | 5  |

|    |           |           |                                                                                                                                                                                                             |          |    |           |    |   |
|----|-----------|-----------|-------------------------------------------------------------------------------------------------------------------------------------------------------------------------------------------------------------|----------|----|-----------|----|---|
| 33 | linear    | Logit(CF) | Health System Access 2 (unitless), Malnutrition - proportion <2SD weight for age (logit transformed)                                                                                                        | 1.082859 | 14 | 0.5704545 | 58 | 4 |
| 34 | Spacetime | Logit(CF) | Health System Access 2 (unitless), Malnutrition - proportion <2SD weight for age (logit transformed), Indoor Air Pollution (All Cooking Fuels), Smoking Prevalence                                          | 1.091221 | 56 | 0.5702605 | 15 | 4 |
| 35 | linear    | Logit(CF) | Health System Access 2 (unitless), Malnutrition - proportion <2SD weight for age (logit transformed), Indoor Air Pollution (All Cooking Fuels), Smoking Prevalence, Alcohol (liters per capita)             | 1.084539 | 29 | 0.5704087 | 45 | 4 |
| 36 | Spacetime | Logit(CF) | Malnutrition - proportion <2SD weight for age (logit transformed), Indoor Air Pollution (All Cooking Fuels), Alcohol (liters per capita), Education (years per capita)                                      | 1.095026 | 72 | 0.5701822 | 5  | 3 |
| 37 | Spacetime | Logit(CF) | Health System Access 2 (unitless), Smoking Prevalence, Alcohol (liters per capita), Education (years per capita), Lag distributed income per capita (log transformed)                                       | 1.090547 | 52 | 0.5703035 | 22 | 3 |
| 38 | linear    | Logit(CF) | Health System Access 2 (unitless), Malnutrition - proportion <2SD weight for age (logit transformed), Education (years per capita), Lag distributed income per capita (log transformed)                     | 1.082205 | 10 | 0.5704794 | 65 | 3 |
| 39 | Spacetime | Logit(CF) | Malnutrition - proportion <2SD weight for age (logit transformed), Alcohol (liters per capita), Education (years per capita), Lag distributed income per capita (log transformed)                           | 1.091336 | 57 | 0.5702994 | 20 | 2 |
| 40 | Spacetime | Logit(CF) | Malnutrition - proportion <2SD weight for age (logit transformed), Indoor Air Pollution (All Cooking Fuels), Smoking Prevalence, Alcohol (liters per capita), Education (years per capita)                  | 1.095433 | 75 | 0.5702059 | 6  | 2 |
| 41 | Spacetime | Logit(CF) | Health System Access 2 (unitless), Education (years per capita), Lag distributed income per capita (log transformed)                                                                                        | 1.088492 | 39 | 0.5703912 | 42 | 2 |
| 42 | linear    | Logit(CF) | Health System Access 2 (unitless), Malnutrition - proportion <2SD weight for age (logit transformed), Alcohol (liters per capita)                                                                           | 1.082593 | 12 | 0.5704881 | 68 | 2 |
| 43 | linear    | Logit(CF) | Health System Access 2 (unitless), Malnutrition - proportion <2SD weight for age (logit transformed), Smoking Prevalence                                                                                    | 1.083565 | 20 | 0.5704534 | 57 | 2 |
| 44 | linear    | Logit(CF) | Health System Access 2 (unitless), Malnutrition - proportion <2SD weight for age (logit transformed), Smoking Prevalence, Education (years per capita), Lag distributed income per capita (log transformed) | 1.08304  | 16 | 0.570473  | 62 | 2 |
| 45 | Spacetime | Logit(CF) | Malnutrition - proportion <2SD weight for age (logit transformed), Alcohol (liters per capita)                                                                                                              | 1.086891 | 36 | 0.570479  | 64 | 1 |
| 46 | Spacetime | Logit(CF) | Malnutrition - proportion <2SD weight for age (logit transformed), Smoking Prevalence, Alcohol (liters per capita), Education (years per capita), Lag distributed income per capita (log transformed)       | 1.095155 | 74 | 0.5703246 | 26 | 1 |
| 47 | Spacetime | Logit(CF) | Malnutrition - proportion <2SD weight for age (logit transformed), Indoor Air Pollution (All Cooking Fuels), Education (years per capita)                                                                   | 1.093418 | 62 | 0.5703507 | 30 | 1 |
| 48 | Spacetime | Logit(CF) | Malnutrition - proportion <2SD weight for age (logit transformed), Indoor Air Pollution (All Cooking Fuels), Alcohol (liters per capita)                                                                    | 1.099033 | 85 | 0.570303  | 21 | 1 |
| 49 | linear    | Logit(CF) | Malnutrition - proportion <2SD weight for age (logit transformed), Indoor Air Pollution (All Cooking Fuels), Smoking Prevalence, Education (years per capita)                                               | 1.090419 | 50 | 0.5704511 | 56 | 1 |
| 50 | linear    | Logit(CF) | Malnutrition - proportion <2SD weight for age (logit transformed), Indoor Air Pollution (All Cooking Fuels), Smoking Prevalence, Alcohol (liters per capita), Education (years per capita)                  | 1.090761 | 53 | 0.570442  | 52 | 1 |
| 51 | Spacetime | Logit(CF) | Health System Access 2 (unitless), Smoking Prevalence, Education (years per capita), Lag distributed income per capita (log transformed)                                                                    | 1.093883 | 64 | 0.5703874 | 41 | 1 |



|    |           |           |                                                                                                                                                                                                                                          |          |     |           |     |   |
|----|-----------|-----------|------------------------------------------------------------------------------------------------------------------------------------------------------------------------------------------------------------------------------------------|----------|-----|-----------|-----|---|
| 52 | linear    | Logit(CF) | Health System Access 2 (unitless), Malnutrition - proportion <2SD weight for age (logit transformed), Alcohol (liters per capita), Education (years per capita), Lag distributed income per capita (log transformed)                     | 1.081894 | 8   | 0.5705036 | 74  | 1 |
| 53 | linear    | Logit(CF) | Health System Access 2 (unitless), Malnutrition - proportion <2SD weight for age (logit transformed), Smoking Prevalence, Alcohol (liters per capita)                                                                                    | 1.083661 | 21  | 0.5704919 | 71  | 1 |
| 54 | linear    | Logit(CF) | Health System Access 2 (unitless), Malnutrition - proportion <2SD weight for age (logit transformed), Smoking Prevalence, Alcohol (liters per capita), Education (years per capita), Lag distributed income per capita (log transformed) | 1.082939 | 15  | 0.5705044 | 75  | 1 |
| 55 | Spacetime | Logit(CF) | Health System Access 2 (unitless), Malnutrition - proportion <2SD weight for age (logit transformed), Indoor Air Pollution (All Cooking Fuels), Smoking Prevalence, Education (years per capita)                                         | 1.095116 | 73  | 0.5702263 | 9   | 1 |
| 56 | linear    | Logit(CF) | Smoking Prevalence                                                                                                                                                                                                                       | 1.233163 | 257 | 0.5725478 | 252 | 0 |
| 57 | Spacetime | Logit(CF) | Smoking Prevalence                                                                                                                                                                                                                       | 1.164472 | 209 | 0.5715402 | 153 | 0 |
| 58 | linear    | Logit(CF) | Smoking Prevalence, Education (years per capita), Lag distributed income per capita (log transformed)                                                                                                                                    | 1.139995 | 136 | 0.5708441 | 112 | 0 |
| 59 | Spacetime | Logit(CF) | Smoking Prevalence, Education (years per capita), Lag distributed income per capita (log transformed)                                                                                                                                    | 1.12831  | 108 | 0.5706899 | 104 | 0 |
| 60 | linear    | Logit(CF) | Smoking Prevalence, Alcohol (liters per capita)                                                                                                                                                                                          | 1.232413 | 256 | 0.5725289 | 250 | 0 |
| 61 | Spacetime | Logit(CF) | Smoking Prevalence, Alcohol (liters per capita)                                                                                                                                                                                          | 1.164189 | 205 | 0.5714986 | 144 | 0 |
| 62 | linear    | Logit(CF) | Smoking Prevalence, Alcohol (liters per capita), Education (years per capita), Lag distributed income per capita (log transformed)                                                                                                       | 1.133541 | 119 | 0.5706891 | 103 | 0 |
| 63 | Spacetime | Logit(CF) | Smoking Prevalence, Alcohol (liters per capita), Education (years per capita), Lag distributed income per capita (log transformed)                                                                                                       | 1.120462 | 104 | 0.5704879 | 67  | 0 |
| 64 | linear    | Logit(CF) | Indoor Air Pollution (All Cooking Fuels)                                                                                                                                                                                                 | 1.198034 | 242 | 0.5712211 | 122 | 0 |
| 65 | Spacetime | Logit(CF) | Indoor Air Pollution (All Cooking Fuels)                                                                                                                                                                                                 | 1.134738 | 123 | 0.5707774 | 108 | 0 |
| 66 | linear    | Logit(CF) | Indoor Air Pollution (All Cooking Fuels), Education (years per capita), Lag distributed income per capita (log transformed)                                                                                                              | 1.16129  | 189 | 0.5707199 | 105 | 0 |
| 67 | Spacetime | Logit(CF) | Indoor Air Pollution (All Cooking Fuels), Education (years per capita), Lag distributed income per capita (log transformed)                                                                                                              | 1.117875 | 102 | 0.5705386 | 84  | 0 |
| 68 | linear    | Logit(CF) | Indoor Air Pollution (All Cooking Fuels), Alcohol (liters per capita)                                                                                                                                                                    | 1.192313 | 238 | 0.5710644 | 118 | 0 |
| 69 | Spacetime | Logit(CF) | Indoor Air Pollution (All Cooking Fuels), Alcohol (liters per capita)                                                                                                                                                                    | 1.134293 | 122 | 0.5706553 | 100 | 0 |
| 70 | linear    | Logit(CF) | Indoor Air Pollution (All Cooking Fuels), Alcohol (liters per capita), Education (years per capita), Lag distributed income per capita (log transformed)                                                                                 | 1.137636 | 130 | 0.5704915 | 70  | 0 |
| 71 | Spacetime | Logit(CF) | Indoor Air Pollution (All Cooking Fuels), Alcohol (liters per capita), Education (years per capita), Lag distributed income per capita (log transformed)                                                                                 | 1.103126 | 91  | 0.5702876 | 18  | 0 |
| 72 | linear    | Logit(CF) | Indoor Air Pollution (All Cooking Fuels), Smoking Prevalence                                                                                                                                                                             | 1.178214 | 228 | 0.5712475 | 124 | 0 |
| 73 | Spacetime | Logit(CF) | Indoor Air Pollution (All Cooking Fuels), Smoking Prevalence                                                                                                                                                                             | 1.128259 | 107 | 0.5707785 | 109 | 0 |
| 74 | linear    | Logit(CF) | Indoor Air Pollution (All Cooking Fuels), Smoking Prevalence, Education (years per capita), Lag distributed income per capita (log transformed)                                                                                          | 1.141948 | 143 | 0.5706869 | 101 | 0 |
| 75 | Spacetime | Logit(CF) | Indoor Air Pollution (All Cooking Fuels), Smoking Prevalence, Education (years per capita), Lag distributed income per capita (log transformed)                                                                                          | 1.108227 | 100 | 0.570521  | 78  | 0 |
| 76 | linear    | Logit(CF) | Indoor Air Pollution (All Cooking Fuels), Smoking Prevalence, Alcohol (liters per capita)                                                                                                                                                | 1.176949 | 226 | 0.5711427 | 120 | 0 |
| 77 | Spacetime | Logit(CF) | Indoor Air Pollution (All Cooking Fuels), Smoking Prevalence, Alcohol (liters per capita)                                                                                                                                                | 1.128709 | 109 | 0.5706881 | 102 | 0 |
| 78 | linear    | Logit(CF) | Indoor Air Pollution (All Cooking Fuels), Smoking Prevalence, Alcohol (liters per capita), Education (years per capita), Lag distributed income per capita (log transformed)                                                             | 1.127193 | 106 | 0.5704864 | 66  | 0 |

|     |           |           |                                                                                                                                                                                                       |          |    |           |    |   |
|-----|-----------|-----------|-------------------------------------------------------------------------------------------------------------------------------------------------------------------------------------------------------|----------|----|-----------|----|---|
| 79  | Spacetime | Logit(CF) | Indoor Air Pollution (All Cooking Fuels), Smoking Prevalence, Alcohol (liters per capita), Education (years per capita), Lag distributed income per capita (log transformed)                          | 1.097603 | 83 | 0.5703099 | 23 | 0 |
| 80  | linear    | Logit(CF) | Malnutrition - proportion <2SD weight for age (logit transformed)                                                                                                                                     | 1.093363 | 61 | 0.5705072 | 76 | 0 |
| 81  | Spacetime | Logit(CF) | Malnutrition - proportion <2SD weight for age (logit transformed)                                                                                                                                     | 1.089729 | 46 | 0.5705345 | 82 | 0 |
| 82  | linear    | Logit(CF) | Malnutrition - proportion <2SD weight for age (logit transformed), Education (years per capita), Lag distributed income per capita (log transformed)                                                  | 1.102558 | 90 | 0.5705579 | 89 | 0 |
| 83  | Spacetime | Logit(CF) | Malnutrition - proportion <2SD weight for age (logit transformed), Education (years per capita), Lag distributed income per capita (log transformed)                                                  | 1.094042 | 67 | 0.570449  | 54 | 0 |
| 84  | linear    | Logit(CF) | Malnutrition - proportion <2SD weight for age (logit transformed), Alcohol (liters per capita)                                                                                                        | 1.094339 | 70 | 0.5705307 | 81 | 0 |
| 85  | linear    | Logit(CF) | Malnutrition - proportion <2SD weight for age (logit transformed), Alcohol (liters per capita), Education (years per capita), Lag distributed income per capita (log transformed)                     | 1.101429 | 89 | 0.5705548 | 88 | 0 |
| 86  | linear    | Logit(CF) | Malnutrition - proportion <2SD weight for age (logit transformed), Smoking Prevalence                                                                                                                 | 1.089692 | 45 | 0.5705036 | 73 | 0 |
| 87  | Spacetime | Logit(CF) | Malnutrition - proportion <2SD weight for age (logit transformed), Smoking Prevalence                                                                                                                 | 1.095867 | 79 | 0.5705515 | 86 | 0 |
| 88  | linear    | Logit(CF) | Malnutrition - proportion <2SD weight for age (logit transformed), Smoking Prevalence, Education (years per capita), Lag distributed income per capita (log transformed)                              | 1.09673  | 81 | 0.5705448 | 85 | 0 |
| 89  | Spacetime | Logit(CF) | Malnutrition - proportion <2SD weight for age (logit transformed), Smoking Prevalence, Education (years per capita), Lag distributed income per capita (log transformed)                              | 1.096807 | 82 | 0.5704558 | 59 | 0 |
| 90  | linear    | Logit(CF) | Malnutrition - proportion <2SD weight for age (logit transformed), Smoking Prevalence, Alcohol (liters per capita)                                                                                    | 1.090392 | 49 | 0.5705359 | 83 | 0 |
| 91  | Spacetime | Logit(CF) | Malnutrition - proportion <2SD weight for age (logit transformed), Smoking Prevalence, Alcohol (liters per capita)                                                                                    | 1.092337 | 59 | 0.5705107 | 77 | 0 |
| 92  | linear    | Logit(CF) | Malnutrition - proportion <2SD weight for age (logit transformed), Smoking Prevalence, Alcohol (liters per capita), Education (years per capita), Lag distributed income per capita (log transformed) | 1.096306 | 80 | 0.5705529 | 87 | 0 |
| 93  | linear    | Logit(CF) | Malnutrition - proportion <2SD weight for age (logit transformed), Indoor Air Pollution (All Cooking Fuels)                                                                                           | 1.093248 | 60 | 0.5705019 | 72 | 0 |
| 94  | Spacetime | Logit(CF) | Malnutrition - proportion <2SD weight for age (logit transformed), Indoor Air Pollution (All Cooking Fuels)                                                                                           | 1.100847 | 88 | 0.5703858 | 39 | 0 |
| 95  | linear    | Logit(CF) | Malnutrition - proportion <2SD weight for age (logit transformed), Indoor Air Pollution (All Cooking Fuels), Education (years per capita)                                                             | 1.093955 | 65 | 0.5704727 | 61 | 0 |
| 96  | linear    | Logit(CF) | Malnutrition - proportion <2SD weight for age (logit transformed), Indoor Air Pollution (All Cooking Fuels), Alcohol (liters per capita)                                                              | 1.093863 | 63 | 0.5705243 | 80 | 0 |
| 97  | linear    | Logit(CF) | Malnutrition - proportion <2SD weight for age (logit transformed), Indoor Air Pollution (All Cooking Fuels), Alcohol (liters per capita), Education (years per capita)                                | 1.094008 | 66 | 0.5704506 | 55 | 0 |
| 98  | linear    | Logit(CF) | Malnutrition - proportion <2SD weight for age (logit transformed), Indoor Air Pollution (All Cooking Fuels), Smoking Prevalence                                                                       | 1.089765 | 47 | 0.5704887 | 69 | 0 |
| 99  | Spacetime | Logit(CF) | Malnutrition - proportion <2SD weight for age (logit transformed), Indoor Air Pollution (All Cooking Fuels), Smoking Prevalence                                                                       | 1.106221 | 94 | 0.5704016 | 44 | 0 |
| 100 | Spacetime | Logit(CF) | Malnutrition - proportion <2SD weight for age (logit transformed), Indoor Air Pollution (All Cooking Fuels), Smoking Prevalence, Education (years per capita)                                         | 1.106445 | 95 | 0.5703562 | 31 | 0 |

|     |           |           |                                                                                                                                                                                                                 |          |     |           |     |   |
|-----|-----------|-----------|-----------------------------------------------------------------------------------------------------------------------------------------------------------------------------------------------------------------|----------|-----|-----------|-----|---|
| 101 | linear    | Logit(CF) | Malnutrition - proportion <2SD weight for age (logit transformed), Indoor Air Pollution (All Cooking Fuels), Smoking Prevalence, Alcohol (liters per capita)                                                    | 1.090462 | 51  | 0.5705214 | 79  | 0 |
| 102 | Spacetime | Logit(CF) | Malnutrition - proportion <2SD weight for age (logit transformed), Indoor Air Pollution (All Cooking Fuels), Smoking Prevalence, Alcohol (liters per capita)                                                    | 1.103987 | 92  | 0.570335  | 27  | 0 |
| 103 | linear    | Logit(CF) | Health System Access 2 (unitless)                                                                                                                                                                               | 1.099879 | 86  | 0.5713618 | 128 | 0 |
| 104 | Spacetime | Logit(CF) | Health System Access 2 (unitless)                                                                                                                                                                               | 1.089576 | 44  | 0.5708438 | 111 | 0 |
| 105 | linear    | Logit(CF) | Health System Access 2 (unitless), Education (years per capita), Lag distributed income per capita (log transformed)                                                                                            | 1.094611 | 71  | 0.5705992 | 93  | 0 |
| 106 | linear    | Logit(CF) | Health System Access 2 (unitless), Alcohol (liters per capita)                                                                                                                                                  | 1.100567 | 87  | 0.5713792 | 131 | 0 |
| 107 | Spacetime | Logit(CF) | Health System Access 2 (unitless), Alcohol (liters per capita)                                                                                                                                                  | 1.088097 | 37  | 0.5708471 | 113 | 0 |
| 108 | linear    | Logit(CF) | Health System Access 2 (unitless), Alcohol (liters per capita), Education (years per capita), Lag distributed income per capita (log transformed)                                                               | 1.091768 | 58  | 0.5705833 | 90  | 0 |
| 109 | linear    | Logit(CF) | Health System Access 2 (unitless), Smoking Prevalence                                                                                                                                                           | 1.106873 | 96  | 0.5713279 | 127 | 0 |
| 110 | Spacetime | Logit(CF) | Health System Access 2 (unitless), Smoking Prevalence                                                                                                                                                           | 1.090762 | 54  | 0.5708414 | 110 | 0 |
| 111 | linear    | Logit(CF) | Health System Access 2 (unitless), Smoking Prevalence, Education (years per capita), Lag distributed income per capita (log transformed)                                                                        | 1.098397 | 84  | 0.5705868 | 92  | 0 |
| 112 | linear    | Logit(CF) | Health System Access 2 (unitless), Smoking Prevalence, Alcohol (liters per capita)                                                                                                                              | 1.108174 | 99  | 0.5713626 | 129 | 0 |
| 113 | Spacetime | Logit(CF) | Health System Access 2 (unitless), Smoking Prevalence, Alcohol (liters per capita)                                                                                                                              | 1.090199 | 48  | 0.5708507 | 114 | 0 |
| 114 | linear    | Logit(CF) | Health System Access 2 (unitless), Smoking Prevalence, Alcohol (liters per capita), Education (years per capita), Lag distributed income per capita (log transformed)                                           | 1.095768 | 77  | 0.5705841 | 91  | 0 |
| 115 | linear    | Logit(CF) | Health System Access 2 (unitless), Indoor Air Pollution (All Cooking Fuels)                                                                                                                                     | 1.107047 | 98  | 0.5706442 | 99  | 0 |
| 116 | linear    | Logit(CF) | Health System Access 2 (unitless), Indoor Air Pollution (All Cooking Fuels), Education (years per capita), Lag distributed income per capita (log transformed)                                                  | 1.0941   | 68  | 0.570475  | 63  | 0 |
| 117 | linear    | Logit(CF) | Health System Access 2 (unitless), Indoor Air Pollution (All Cooking Fuels), Alcohol (liters per capita)                                                                                                        | 1.108463 | 101 | 0.5706197 | 94  | 0 |
| 118 | linear    | Logit(CF) | Health System Access 2 (unitless), Indoor Air Pollution (All Cooking Fuels), Alcohol (liters per capita), Education (years per capita), Lag distributed income per capita (log transformed)                     | 1.094115 | 69  | 0.5704135 | 48  | 0 |
| 119 | linear    | Logit(CF) | Health System Access 2 (unitless), Indoor Air Pollution (All Cooking Fuels), Smoking Prevalence                                                                                                                 | 1.105652 | 93  | 0.57063   | 97  | 0 |
| 120 | linear    | Logit(CF) | Health System Access 2 (unitless), Indoor Air Pollution (All Cooking Fuels), Smoking Prevalence, Education (years per capita), Lag distributed income per capita (log transformed)                              | 1.095834 | 78  | 0.5704578 | 60  | 0 |
| 121 | linear    | Logit(CF) | Health System Access 2 (unitless), Indoor Air Pollution (All Cooking Fuels), Smoking Prevalence, Alcohol (liters per capita)                                                                                    | 1.106969 | 97  | 0.5706236 | 95  | 0 |
| 122 | linear    | Logit(CF) | Health System Access 2 (unitless), Indoor Air Pollution (All Cooking Fuels), Smoking Prevalence, Alcohol (liters per capita), Education (years per capita), Lag distributed income per capita (log transformed) | 1.095437 | 76  | 0.5704104 | 47  | 0 |
| 123 | linear    | Logit(CF) | Cumulative Cigarettes (5 years)                                                                                                                                                                                 | 1.247688 | 263 | 0.5725533 | 253 | 0 |
| 124 | Spacetime | Logit(CF) | Cumulative Cigarettes (5 years)                                                                                                                                                                                 | 1.160898 | 187 | 0.571536  | 151 | 0 |
| 125 | linear    | Logit(CF) | Cumulative Cigarettes (5 years), Lag distributed income per capita (log transformed)                                                                                                                            | 1.198657 | 243 | 0.5714251 | 136 | 0 |
| 126 | Spacetime | Logit(CF) | Cumulative Cigarettes (5 years), Lag distributed income per capita (log transformed)                                                                                                                            | 1.14068  | 137 | 0.5709975 | 116 | 0 |

|     |           |           |                                                                                                                                                             |          |     |           |     |   |
|-----|-----------|-----------|-------------------------------------------------------------------------------------------------------------------------------------------------------------|----------|-----|-----------|-----|---|
| 127 | linear    | Logit(CF) | Cumulative Cigarettes (5 years), Alcohol (liters per capita)                                                                                                | 1.248552 | 264 | 0.5724737 | 248 | 0 |
| 128 | Spacetime | Logit(CF) | Cumulative Cigarettes (5 years), Alcohol (liters per capita)                                                                                                | 1.159463 | 178 | 0.5714648 | 140 | 0 |
| 129 | linear    | Logit(CF) | Cumulative Cigarettes (5 years), Alcohol (liters per capita), Lag distributed income per capita (log transformed)                                           | 1.194489 | 241 | 0.5714008 | 132 | 0 |
| 130 | Spacetime | Logit(CF) | Cumulative Cigarettes (5 years), Alcohol (liters per capita), Lag distributed income per capita (log transformed)                                           | 1.133682 | 121 | 0.5709086 | 115 | 0 |
| 131 | linear    | Logit(CF) | Cumulative Cigarettes (5 years), Indoor Air Pollution (All Cooking Fuels)                                                                                   | 1.192941 | 239 | 0.571244  | 123 | 0 |
| 132 | Spacetime | Logit(CF) | Cumulative Cigarettes (5 years), Indoor Air Pollution (All Cooking Fuels)                                                                                   | 1.135056 | 125 | 0.5707603 | 107 | 0 |
| 133 | linear    | Logit(CF) | Cumulative Cigarettes (5 years), Indoor Air Pollution (All Cooking Fuels), Lag distributed income per capita (log transformed)                              | 1.185173 | 231 | 0.5711617 | 121 | 0 |
| 134 | Spacetime | Logit(CF) | Cumulative Cigarettes (5 years), Indoor Air Pollution (All Cooking Fuels), Lag distributed income per capita (log transformed)                              | 1.133312 | 117 | 0.5707365 | 106 | 0 |
| 135 | linear    | Logit(CF) | Cumulative Cigarettes (5 years), Indoor Air Pollution (All Cooking Fuels), Alcohol (liters per capita)                                                      | 1.185318 | 232 | 0.5711005 | 119 | 0 |
| 136 | Spacetime | Logit(CF) | Cumulative Cigarettes (5 years), Indoor Air Pollution (All Cooking Fuels), Alcohol (liters per capita)                                                      | 1.134967 | 124 | 0.5706439 | 98  | 0 |
| 137 | linear    | Logit(CF) | Cumulative Cigarettes (5 years), Indoor Air Pollution (All Cooking Fuels), Alcohol (liters per capita), Lag distributed income per capita (log transformed) | 1.182799 | 230 | 0.5710558 | 117 | 0 |
| 138 | Spacetime | Logit(CF) | Cumulative Cigarettes (5 years), Indoor Air Pollution (All Cooking Fuels), Alcohol (liters per capita), Lag distributed income per capita (log transformed) | 1.129676 | 111 | 0.5706262 | 96  | 0 |
| 139 | linear    | rate      | Smoking Prevalence                                                                                                                                          | 1.414474 | 283 | 0.5761269 | 285 | 0 |
| 140 | Spacetime | rate      | Smoking Prevalence                                                                                                                                          | 1.294262 | 271 | 0.5742085 | 282 | 0 |
| 141 | linear    | rate      | Smoking Prevalence, Education (years per capita), Lag distributed income per capita (log transformed)                                                       | 1.22542  | 253 | 0.5725418 | 251 | 0 |
| 142 | Spacetime | rate      | Smoking Prevalence, Education (years per capita), Lag distributed income per capita (log transformed)                                                       | 1.193005 | 240 | 0.5723605 | 244 | 0 |
| 143 | linear    | rate      | Smoking Prevalence, Alcohol (liters per capita)                                                                                                             | 1.415504 | 284 | 0.5761739 | 286 | 0 |
| 144 | Spacetime | rate      | Smoking Prevalence, Alcohol (liters per capita)                                                                                                             | 1.294177 | 270 | 0.5741756 | 280 | 0 |
| 145 | linear    | rate      | Smoking Prevalence, Alcohol (liters per capita), Education (years per capita), Lag distributed income per capita (log transformed)                          | 1.204741 | 249 | 0.572296  | 243 | 0 |
| 146 | Spacetime | rate      | Smoking Prevalence, Alcohol (liters per capita), Education (years per capita), Lag distributed income per capita (log transformed)                          | 1.178268 | 229 | 0.5720463 | 232 | 0 |
| 147 | linear    | rate      | Indoor Air Pollution (All Cooking Fuels)                                                                                                                    | 1.343868 | 282 | 0.5736277 | 273 | 0 |
| 148 | Spacetime | rate      | Indoor Air Pollution (All Cooking Fuels)                                                                                                                    | 1.255491 | 267 | 0.5727732 | 263 | 0 |
| 149 | linear    | rate      | Indoor Air Pollution (All Cooking Fuels), Education (years per capita), Lag distributed income per capita (log transformed)                                 | 1.267861 | 269 | 0.5724215 | 246 | 0 |
| 150 | Spacetime | rate      | Indoor Air Pollution (All Cooking Fuels), Education (years per capita), Lag distributed income per capita (log transformed)                                 | 1.208621 | 250 | 0.5721589 | 238 | 0 |
| 151 | linear    | rate      | Indoor Air Pollution (All Cooking Fuels), Alcohol (liters per capita)                                                                                       | 1.323411 | 278 | 0.5734106 | 267 | 0 |
| 152 | Spacetime | rate      | Indoor Air Pollution (All Cooking Fuels), Alcohol (liters per capita)                                                                                       | 1.249564 | 265 | 0.572593  | 255 | 0 |
| 153 | linear    | rate      | Indoor Air Pollution (All Cooking Fuels), Alcohol (liters per capita), Education (years per capita), Lag distributed income per capita (log transformed)    | 1.216312 | 252 | 0.5721135 | 235 | 0 |
| 154 | Spacetime | rate      | Indoor Air Pollution (All Cooking Fuels), Alcohol (liters per capita), Education (years per capita), Lag distributed income per capita (log transformed)    | 1.176993 | 227 | 0.5717666 | 184 | 0 |
| 155 | linear    | rate      | Indoor Air Pollution (All Cooking Fuels), Smoking Prevalence                                                                                                | 1.31631  | 276 | 0.5737168 | 275 | 0 |

|     |           |      |                                                                                                                                                                                                       |          |     |           |     |   |
|-----|-----------|------|-------------------------------------------------------------------------------------------------------------------------------------------------------------------------------------------------------|----------|-----|-----------|-----|---|
| 156 | Spacetime | rate | Indoor Air Pollution (All Cooking Fuels), Smoking Prevalence                                                                                                                                          | 1.242572 | 260 | 0.5727732 | 262 | 0 |
| 157 | linear    | rate | Indoor Air Pollution (All Cooking Fuels), Smoking Prevalence, Education (years per capita), Lag distributed income per capita (log transformed)                                                       | 1.227837 | 254 | 0.57237   | 245 | 0 |
| 158 | Spacetime | rate | Indoor Air Pollution (All Cooking Fuels), Smoking Prevalence, Education (years per capita), Lag distributed income per capita (log transformed)                                                       | 1.186607 | 234 | 0.572135  | 236 | 0 |
| 159 | linear    | rate | Indoor Air Pollution (All Cooking Fuels), Smoking Prevalence, Alcohol (liters per capita)                                                                                                             | 1.310121 | 274 | 0.5735299 | 269 | 0 |
| 160 | Spacetime | rate | Indoor Air Pollution (All Cooking Fuels), Smoking Prevalence, Alcohol (liters per capita)                                                                                                             | 1.23903  | 259 | 0.5726462 | 256 | 0 |
| 161 | linear    | rate | Indoor Air Pollution (All Cooking Fuels), Smoking Prevalence, Alcohol (liters per capita), Education (years per capita), Lag distributed income per capita (log transformed)                          | 1.201371 | 244 | 0.5720768 | 234 | 0 |
| 162 | Spacetime | rate | Indoor Air Pollution (All Cooking Fuels), Smoking Prevalence, Alcohol (liters per capita), Education (years per capita), Lag distributed income per capita (log transformed)                          | 1.167477 | 221 | 0.5718085 | 194 | 0 |
| 163 | linear    | rate | Malnutrition - proportion <2SD weight for age (logit transformed)                                                                                                                                     | 1.16502  | 213 | 0.5719637 | 220 | 0 |
| 164 | Spacetime | rate | Malnutrition - proportion <2SD weight for age (logit transformed)                                                                                                                                     | 1.159943 | 182 | 0.572037  | 231 | 0 |
| 165 | linear    | rate | Malnutrition - proportion <2SD weight for age (logit transformed), Education (years per capita), Lag distributed income per capita (log transformed)                                                  | 1.169704 | 222 | 0.5719323 | 214 | 0 |
| 166 | Spacetime | rate | Malnutrition - proportion <2SD weight for age (logit transformed), Education (years per capita), Lag distributed income per capita (log transformed)                                                  | 1.150063 | 161 | 0.5718463 | 204 | 0 |
| 167 | linear    | rate | Malnutrition - proportion <2SD weight for age (logit transformed), Alcohol (liters per capita)                                                                                                        | 1.166339 | 215 | 0.5719726 | 225 | 0 |
| 168 | Spacetime | rate | Malnutrition - proportion <2SD weight for age (logit transformed), Alcohol (liters per capita)                                                                                                        | 1.160796 | 186 | 0.5719661 | 222 | 0 |
| 169 | linear    | rate | Malnutrition - proportion <2SD weight for age (logit transformed), Alcohol (liters per capita), Education (years per capita), Lag distributed income per capita (log transformed)                     | 1.162039 | 195 | 0.5718503 | 205 | 0 |
| 170 | Spacetime | rate | Malnutrition - proportion <2SD weight for age (logit transformed), Alcohol (liters per capita), Education (years per capita), Lag distributed income per capita (log transformed)                     | 1.130767 | 113 | 0.5716256 | 157 | 0 |
| 171 | linear    | rate | Malnutrition - proportion <2SD weight for age (logit transformed), Smoking Prevalence                                                                                                                 | 1.159977 | 183 | 0.5719609 | 219 | 0 |
| 172 | Spacetime | rate | Malnutrition - proportion <2SD weight for age (logit transformed), Smoking Prevalence                                                                                                                 | 1.157447 | 170 | 0.5720712 | 233 | 0 |
| 173 | linear    | rate | Malnutrition - proportion <2SD weight for age (logit transformed), Smoking Prevalence, Education (years per capita), Lag distributed income per capita (log transformed)                              | 1.161864 | 193 | 0.5719143 | 211 | 0 |
| 174 | Spacetime | rate | Malnutrition - proportion <2SD weight for age (logit transformed), Smoking Prevalence, Education (years per capita), Lag distributed income per capita (log transformed)                              | 1.159042 | 176 | 0.5718718 | 209 | 0 |
| 175 | linear    | rate | Malnutrition - proportion <2SD weight for age (logit transformed), Smoking Prevalence, Alcohol (liters per capita)                                                                                    | 1.162008 | 194 | 0.571977  | 226 | 0 |
| 176 | Spacetime | rate | Malnutrition - proportion <2SD weight for age (logit transformed), Smoking Prevalence, Alcohol (liters per capita)                                                                                    | 1.158685 | 174 | 0.572022  | 229 | 0 |
| 177 | linear    | rate | Malnutrition - proportion <2SD weight for age (logit transformed), Smoking Prevalence, Alcohol (liters per capita), Education (years per capita), Lag distributed income per capita (log transformed) | 1.156563 | 168 | 0.5718459 | 203 | 0 |
| 178 | Spacetime | rate | Malnutrition - proportion <2SD weight for age (logit transformed), Smoking Prevalence, Alcohol (liters per capita), Education (years per capita), Lag distributed income per capita (log transformed) | 1.139839 | 135 | 0.5716791 | 162 | 0 |

|     |           |      |                                                                                                                                                                                                                                                 |          |     |           |     |   |
|-----|-----------|------|-------------------------------------------------------------------------------------------------------------------------------------------------------------------------------------------------------------------------------------------------|----------|-----|-----------|-----|---|
| 179 | linear    | rate | Malnutrition - proportion <2SD weight for age (logit transformed), Indoor Air Pollution (All Cooking Fuels)                                                                                                                                     | 1.164945 | 212 | 0.57197   | 224 | 0 |
| 180 | Spacetime | rate | Malnutrition - proportion <2SD weight for age (logit transformed), Indoor Air Pollution (All Cooking Fuels)                                                                                                                                     | 1.161253 | 188 | 0.5718119 | 196 | 0 |
| 181 | linear    | rate | Malnutrition - proportion <2SD weight for age (logit transformed), Indoor Air Pollution (All Cooking Fuels), Education (years per capita), Lag distributed income per capita (log transformed)                                                  | 1.166732 | 217 | 0.571874  | 210 | 0 |
| 182 | Spacetime | rate | Malnutrition - proportion <2SD weight for age (logit transformed), Indoor Air Pollution (All Cooking Fuels), Education (years per capita), Lag distributed income per capita (log transformed)                                                  | 1.152553 | 165 | 0.5717261 | 175 | 0 |
| 183 | linear    | rate | Malnutrition - proportion <2SD weight for age (logit transformed), Indoor Air Pollution (All Cooking Fuels), Alcohol (liters per capita)                                                                                                        | 1.164394 | 207 | 0.5719657 | 221 | 0 |
| 184 | Spacetime | rate | Malnutrition - proportion <2SD weight for age (logit transformed), Indoor Air Pollution (All Cooking Fuels), Alcohol (liters per capita)                                                                                                        | 1.16182  | 192 | 0.5717042 | 168 | 0 |
| 185 | linear    | rate | Malnutrition - proportion <2SD weight for age (logit transformed), Indoor Air Pollution (All Cooking Fuels), Alcohol (liters per capita), Education (years per capita), Lag distributed income per capita (log transformed)                     | 1.157117 | 169 | 0.5717413 | 177 | 0 |
| 186 | Spacetime | rate | Malnutrition - proportion <2SD weight for age (logit transformed), Indoor Air Pollution (All Cooking Fuels), Alcohol (liters per capita), Education (years per capita), Lag distributed income per capita (log transformed)                     | 1.141981 | 144 | 0.5714844 | 143 | 0 |
| 187 | linear    | rate | Malnutrition - proportion <2SD weight for age (logit transformed), Indoor Air Pollution (All Cooking Fuels), Smoking Prevalence                                                                                                                 | 1.158776 | 175 | 0.571954  | 215 | 0 |
| 188 | Spacetime | rate | Malnutrition - proportion <2SD weight for age (logit transformed), Indoor Air Pollution (All Cooking Fuels), Smoking Prevalence                                                                                                                 | 1.159657 | 180 | 0.5718447 | 202 | 0 |
| 189 | linear    | rate | Malnutrition - proportion <2SD weight for age (logit transformed), Indoor Air Pollution (All Cooking Fuels), Smoking Prevalence, Education (years per capita), Lag distributed income per capita (log transformed)                              | 1.158139 | 172 | 0.5718409 | 201 | 0 |
| 190 | Spacetime | rate | Malnutrition - proportion <2SD weight for age (logit transformed), Indoor Air Pollution (All Cooking Fuels), Smoking Prevalence, Education (years per capita), Lag distributed income per capita (log transformed)                              | 1.163047 | 200 | 0.5717501 | 178 | 0 |
| 191 | linear    | rate | Malnutrition - proportion <2SD weight for age (logit transformed), Indoor Air Pollution (All Cooking Fuels), Smoking Prevalence, Alcohol (liters per capita)                                                                                    | 1.159445 | 177 | 0.5719606 | 218 | 0 |
| 192 | Spacetime | rate | Malnutrition - proportion <2SD weight for age (logit transformed), Indoor Air Pollution (All Cooking Fuels), Smoking Prevalence, Alcohol (liters per capita)                                                                                    | 1.160547 | 184 | 0.5717618 | 181 | 0 |
| 193 | linear    | rate | Malnutrition - proportion <2SD weight for age (logit transformed), Indoor Air Pollution (All Cooking Fuels), Smoking Prevalence, Alcohol (liters per capita), Education (years per capita), Lag distributed income per capita (log transformed) | 1.151256 | 162 | 0.5717272 | 176 | 0 |
| 194 | Spacetime | rate | Malnutrition - proportion <2SD weight for age (logit transformed), Indoor Air Pollution (All Cooking Fuels), Smoking Prevalence, Alcohol (liters per capita), Education (years per capita), Lag distributed income per capita (log transformed) | 1.142749 | 148 | 0.5715367 | 152 | 0 |
| 195 | linear    | rate | Health System Access 2 (unitless)                                                                                                                                                                                                               | 1.202368 | 247 | 0.5736186 | 272 | 0 |
| 196 | Spacetime | rate | Health System Access 2 (unitless)                                                                                                                                                                                                               | 1.167345 | 220 | 0.57268   | 258 | 0 |
| 197 | linear    | rate | Health System Access 2 (unitless), Education (years per capita), Lag distributed income per capita (log transformed)                                                                                                                            | 1.162689 | 198 | 0.5718664 | 208 | 0 |

|     |           |      |                                                                                                                                                                                             |          |     |           |     |   |
|-----|-----------|------|---------------------------------------------------------------------------------------------------------------------------------------------------------------------------------------------|----------|-----|-----------|-----|---|
| 198 | Spacetime | rate | Health System Access 2 (unitless), Education (years per capita), Lag distributed income per capita (log transformed)                                                                        | 1.141862 | 142 | 0.5716475 | 158 | 0 |
| 199 | linear    | rate | Health System Access 2 (unitless), Alcohol (liters per capita)                                                                                                                              | 1.201678 | 245 | 0.5736562 | 274 | 0 |
| 200 | Spacetime | rate | Health System Access 2 (unitless), Alcohol (liters per capita)                                                                                                                              | 1.16673  | 216 | 0.5726981 | 259 | 0 |
| 201 | linear    | rate | Health System Access 2 (unitless), Alcohol (liters per capita), Education (years per capita), Lag distributed income per capita (log transformed)                                           | 1.157716 | 171 | 0.5718257 | 199 | 0 |
| 202 | Spacetime | rate | Health System Access 2 (unitless), Alcohol (liters per capita), Education (years per capita), Lag distributed income per capita (log transformed)                                           | 1.136096 | 127 | 0.5715248 | 148 | 0 |
| 203 | linear    | rate | Health System Access 2 (unitless), Smoking Prevalence                                                                                                                                       | 1.202328 | 246 | 0.573567  | 270 | 0 |
| 204 | Spacetime | rate | Health System Access 2 (unitless), Smoking Prevalence                                                                                                                                       | 1.166895 | 218 | 0.572677  | 257 | 0 |
| 205 | linear    | rate | Health System Access 2 (unitless), Smoking Prevalence, Education (years per capita), Lag distributed income per capita (log transformed)                                                    | 1.16265  | 197 | 0.571862  | 207 | 0 |
| 206 | Spacetime | rate | Health System Access 2 (unitless), Smoking Prevalence, Education (years per capita), Lag distributed income per capita (log transformed)                                                    | 1.141121 | 139 | 0.5716631 | 160 | 0 |
| 207 | linear    | rate | Health System Access 2 (unitless), Smoking Prevalence, Alcohol (liters per capita)                                                                                                          | 1.20237  | 248 | 0.5735979 | 271 | 0 |
| 208 | Spacetime | rate | Health System Access 2 (unitless), Smoking Prevalence, Alcohol (liters per capita)                                                                                                          | 1.167158 | 219 | 0.5727059 | 260 | 0 |
| 209 | linear    | rate | Health System Access 2 (unitless), Smoking Prevalence, Alcohol (liters per capita), Education (years per capita), Lag distributed income per capita (log transformed)                       | 1.155358 | 167 | 0.5718277 | 200 | 0 |
| 210 | Spacetime | rate | Health System Access 2 (unitless), Smoking Prevalence, Alcohol (liters per capita), Education (years per capita), Lag distributed income per capita (log transformed)                       | 1.135057 | 126 | 0.5715578 | 154 | 0 |
| 211 | linear    | rate | Health System Access 2 (unitless), Indoor Air Pollution (All Cooking Fuels)                                                                                                                 | 1.187395 | 237 | 0.5722766 | 242 | 0 |
| 212 | Spacetime | rate | Health System Access 2 (unitless), Indoor Air Pollution (All Cooking Fuels)                                                                                                                 | 1.163616 | 202 | 0.571803  | 193 | 0 |
| 213 | linear    | rate | Health System Access 2 (unitless), Indoor Air Pollution (All Cooking Fuels), Education (years per capita), Lag distributed income per capita (log transformed)                              | 1.165522 | 214 | 0.5717794 | 188 | 0 |
| 214 | Spacetime | rate | Health System Access 2 (unitless), Indoor Air Pollution (All Cooking Fuels), Education (years per capita), Lag distributed income per capita (log transformed)                              | 1.133623 | 120 | 0.5715181 | 147 | 0 |
| 215 | linear    | rate | Health System Access 2 (unitless), Indoor Air Pollution (All Cooking Fuels), Alcohol (liters per capita)                                                                                    | 1.187159 | 236 | 0.5722407 | 239 | 0 |
| 216 | Spacetime | rate | Health System Access 2 (unitless), Indoor Air Pollution (All Cooking Fuels), Alcohol (liters per capita)                                                                                    | 1.164093 | 204 | 0.5717728 | 185 | 0 |
| 217 | linear    | rate | Health System Access 2 (unitless), Indoor Air Pollution (All Cooking Fuels), Alcohol (liters per capita), Education (years per capita), Lag distributed income per capita (log transformed) | 1.163568 | 201 | 0.5716979 | 166 | 0 |
| 218 | Spacetime | rate | Health System Access 2 (unitless), Indoor Air Pollution (All Cooking Fuels), Alcohol (liters per capita), Education (years per capita), Lag distributed income per capita (log transformed) | 1.133484 | 118 | 0.5713741 | 130 | 0 |
| 219 | linear    | rate | Health System Access 2 (unitless), Indoor Air Pollution (All Cooking Fuels), Smoking Prevalence                                                                                             | 1.186944 | 235 | 0.5722735 | 241 | 0 |
| 220 | Spacetime | rate | Health System Access 2 (unitless), Indoor Air Pollution (All Cooking Fuels), Smoking Prevalence                                                                                             | 1.164025 | 203 | 0.571809  | 195 | 0 |
| 221 | linear    | rate | Health System Access 2 (unitless), Indoor Air Pollution (All Cooking Fuels), Smoking Prevalence, Education (years per capita), Lag distributed income per capita (log transformed)          | 1.160644 | 185 | 0.5717637 | 182 | 0 |

|     |           |      |                                                                                                                                                                                                                      |          |     |           |     |   |
|-----|-----------|------|----------------------------------------------------------------------------------------------------------------------------------------------------------------------------------------------------------------------|----------|-----|-----------|-----|---|
| 222 | Spacetime | rate | Health System Access 2 (unitless), Indoor Air Pollution (All Cooking Fuels), Smoking Prevalence, Education (years per capita), Lag distributed income per capita (log transformed)                                   | 1.131884 | 115 | 0.5715335 | 150 | 0 |
| 223 | linear    | rate | Health System Access 2 (unitless), Indoor Air Pollution (All Cooking Fuels), Smoking Prevalence, Alcohol (liters per capita)                                                                                         | 1.186307 | 233 | 0.5722497 | 240 | 0 |
| 224 | Spacetime | rate | Health System Access 2 (unitless), Indoor Air Pollution (All Cooking Fuels), Smoking Prevalence, Alcohol (liters per capita)                                                                                         | 1.164398 | 208 | 0.5717919 | 190 | 0 |
| 225 | linear    | rate | Health System Access 2 (unitless), Indoor Air Pollution (All Cooking Fuels), Smoking Prevalence, Alcohol (liters per capita), Education (years per capita), Lag distributed income per capita (log transformed)      | 1.158659 | 173 | 0.5716894 | 163 | 0 |
| 226 | Spacetime | rate | Health System Access 2 (unitless), Indoor Air Pollution (All Cooking Fuels), Smoking Prevalence, Alcohol (liters per capita), Education (years per capita), Lag distributed income per capita (log transformed)      | 1.12941  | 110 | 0.5714074 | 134 | 0 |
| 227 | linear    | rate | Health System Access 2 (unitless), Malnutrition - proportion <2SD weight for age (logit transformed)                                                                                                                 | 1.15242  | 164 | 0.571791  | 189 | 0 |
| 228 | Spacetime | rate | Health System Access 2 (unitless), Malnutrition - proportion <2SD weight for age (logit transformed)                                                                                                                 | 1.142645 | 146 | 0.5717589 | 180 | 0 |
| 229 | linear    | rate | Health System Access 2 (unitless), Malnutrition - proportion <2SD weight for age (logit transformed), Education (years per capita), Lag distributed income per capita (log transformed)                              | 1.148161 | 158 | 0.5717244 | 174 | 0 |
| 230 | Spacetime | rate | Health System Access 2 (unitless), Malnutrition - proportion <2SD weight for age (logit transformed), Education (years per capita), Lag distributed income per capita (log transformed)                              | 1.133175 | 116 | 0.5715012 | 146 | 0 |
| 231 | linear    | rate | Health System Access 2 (unitless), Malnutrition - proportion <2SD weight for age (logit transformed), Alcohol (liters per capita)                                                                                    | 1.154285 | 166 | 0.5718185 | 197 | 0 |
| 232 | Spacetime | rate | Health System Access 2 (unitless), Malnutrition - proportion <2SD weight for age (logit transformed), Alcohol (liters per capita)                                                                                    | 1.143015 | 149 | 0.5717533 | 179 | 0 |
| 233 | linear    | rate | Health System Access 2 (unitless), Malnutrition - proportion <2SD weight for age (logit transformed), Alcohol (liters per capita), Education (years per capita), Lag distributed income per capita (log transformed) | 1.144758 | 154 | 0.5716961 | 164 | 0 |
| 234 | Spacetime | rate | Health System Access 2 (unitless), Malnutrition - proportion <2SD weight for age (logit transformed), Alcohol (liters per capita), Education (years per capita), Lag distributed income per capita (log transformed) | 1.120277 | 103 | 0.5714035 | 133 | 0 |
| 235 | linear    | rate | Health System Access 2 (unitless), Malnutrition - proportion <2SD weight for age (logit transformed), Smoking Prevalence                                                                                             | 1.149319 | 160 | 0.5717942 | 191 | 0 |
| 236 | Spacetime | rate | Health System Access 2 (unitless), Malnutrition - proportion <2SD weight for age (logit transformed), Smoking Prevalence                                                                                             | 1.142328 | 145 | 0.5717729 | 186 | 0 |
| 237 | linear    | rate | Health System Access 2 (unitless), Malnutrition - proportion <2SD weight for age (logit transformed), Smoking Prevalence, Education (years per capita), Lag distributed income per capita (log transformed)          | 1.143707 | 151 | 0.571719  | 173 | 0 |
| 238 | Spacetime | rate | Health System Access 2 (unitless), Malnutrition - proportion <2SD weight for age (logit transformed), Smoking Prevalence, Education (years per capita), Lag distributed income per capita (log transformed)          | 1.13888  | 134 | 0.5715265 | 149 | 0 |
| 239 | linear    | rate | Health System Access 2 (unitless), Malnutrition - proportion <2SD weight for age (logit transformed), Smoking Prevalence, Alcohol (liters per capita)                                                                | 1.151562 | 163 | 0.5718245 | 198 | 0 |
| 240 | Spacetime | rate | Health System Access 2 (unitless), Malnutrition - proportion <2SD weight for age (logit transformed), Smoking Prevalence, Alcohol (liters per capita)                                                                | 1.143284 | 150 | 0.5717741 | 187 | 0 |



|     |           |      |                                                                                                                                                                                                                                                                |          |     |           |     |   |
|-----|-----------|------|----------------------------------------------------------------------------------------------------------------------------------------------------------------------------------------------------------------------------------------------------------------|----------|-----|-----------|-----|---|
| 241 | linear    | rate | Health System Access 2 (unitless), Malnutrition - proportion <2SD weight for age (logit transformed), Smoking Prevalence, Alcohol (liters per capita), Education (years per capita), Lag distributed income per capita (log transformed)                       | 1.141574 | 140 | 0.5716973 | 165 | 0 |
| 242 | Spacetime | rate | Health System Access 2 (unitless), Malnutrition - proportion <2SD weight for age (logit transformed), Smoking Prevalence, Alcohol (liters per capita), Education (years per capita), Lag distributed income per capita (log transformed)                       | 1.131361 | 114 | 0.5714408 | 138 | 0 |
| 243 | linear    | rate | Health System Access 2 (unitless), Malnutrition - proportion <2SD weight for age (logit transformed), Indoor Air Pollution (All Cooking Fuels)                                                                                                                 | 1.14794  | 157 | 0.5717118 | 170 | 0 |
| 244 | Spacetime | rate | Health System Access 2 (unitless), Malnutrition - proportion <2SD weight for age (logit transformed), Indoor Air Pollution (All Cooking Fuels)                                                                                                                 | 1.137669 | 131 | 0.5714842 | 142 | 0 |
| 245 | linear    | rate | Health System Access 2 (unitless), Malnutrition - proportion <2SD weight for age (logit transformed), Indoor Air Pollution (All Cooking Fuels), Education (years per capita), Lag distributed income per capita (log transformed)                              | 1.147296 | 156 | 0.5716743 | 161 | 0 |
| 246 | Spacetime | rate | Health System Access 2 (unitless), Malnutrition - proportion <2SD weight for age (logit transformed), Indoor Air Pollution (All Cooking Fuels), Education (years per capita), Lag distributed income per capita (log transformed)                              | 1.137325 | 129 | 0.5714089 | 135 | 0 |
| 247 | linear    | rate | Health System Access 2 (unitless), Malnutrition - proportion <2SD weight for age (logit transformed), Indoor Air Pollution (All Cooking Fuels), Alcohol (liters per capita)                                                                                    | 1.148611 | 159 | 0.5717152 | 171 | 0 |
| 248 | Spacetime | rate | Health System Access 2 (unitless), Malnutrition - proportion <2SD weight for age (logit transformed), Indoor Air Pollution (All Cooking Fuels), Alcohol (liters per capita)                                                                                    | 1.137767 | 132 | 0.571451  | 139 | 0 |
| 249 | linear    | rate | Health System Access 2 (unitless), Malnutrition - proportion <2SD weight for age (logit transformed), Indoor Air Pollution (All Cooking Fuels), Alcohol (liters per capita), Education (years per capita), Lag distributed income per capita (log transformed) | 1.143907 | 152 | 0.5716123 | 156 | 0 |
| 250 | Spacetime | rate | Health System Access 2 (unitless), Malnutrition - proportion <2SD weight for age (logit transformed), Indoor Air Pollution (All Cooking Fuels), Alcohol (liters per capita), Education (years per capita), Lag distributed income per capita (log transformed) | 1.123377 | 105 | 0.57129   | 125 | 0 |
| 251 | linear    | rate | Health System Access 2 (unitless), Malnutrition - proportion <2SD weight for age (logit transformed), Indoor Air Pollution (All Cooking Fuels), Smoking Prevalence                                                                                             | 1.144257 | 153 | 0.5717057 | 169 | 0 |
| 252 | Spacetime | rate | Health System Access 2 (unitless), Malnutrition - proportion <2SD weight for age (logit transformed), Indoor Air Pollution (All Cooking Fuels), Smoking Prevalence                                                                                             | 1.137153 | 128 | 0.5714992 | 145 | 0 |
| 253 | linear    | rate | Health System Access 2 (unitless), Malnutrition - proportion <2SD weight for age (logit transformed), Indoor Air Pollution (All Cooking Fuels), Smoking Prevalence, Education (years per capita), Lag distributed income per capita (log transformed)          | 1.142707 | 147 | 0.5716588 | 159 | 0 |
| 254 | Spacetime | rate | Health System Access 2 (unitless), Malnutrition - proportion <2SD weight for age (logit transformed), Indoor Air Pollution (All Cooking Fuels), Smoking Prevalence, Education (years per capita), Lag distributed income per capita (log transformed)          | 1.141858 | 141 | 0.5714334 | 137 | 0 |
| 255 | linear    | rate | Health System Access 2 (unitless), Malnutrition - proportion <2SD weight for age (logit transformed), Indoor Air Pollution (All Cooking Fuels), Smoking Prevalence, Alcohol (liters per capita)                                                                | 1.14569  | 155 | 0.5717159 | 172 | 0 |
| 256 | Spacetime | rate | Health System Access 2 (unitless), Malnutrition - proportion <2SD weight for age (logit transformed), Indoor Air Pollution (All Cooking Fuels), Smoking Prevalence, Alcohol (liters per capita)                                                                | 1.137975 | 133 | 0.5714752 | 141 | 0 |

|     |           |      |                                                                                                                                                                                                                                                                                    |          |     |           |     |   |
|-----|-----------|------|------------------------------------------------------------------------------------------------------------------------------------------------------------------------------------------------------------------------------------------------------------------------------------|----------|-----|-----------|-----|---|
| 257 | linear    | rate | Health System Access 2 (unitless), Malnutrition - proportion <2SD weight for age (logit transformed), Indoor Air Pollution (All Cooking Fuels), Smoking Prevalence, Alcohol (liters per capita), Education (years per capita), Lag distributed income per capita (log transformed) | 1.140685 | 138 | 0.5716064 | 155 | 0 |
| 258 | Spacetime | rate | Health System Access 2 (unitless), Malnutrition - proportion <2SD weight for age (logit transformed), Indoor Air Pollution (All Cooking Fuels), Smoking Prevalence, Alcohol (liters per capita), Education (years per capita), Lag distributed income per capita (log transformed) | 1.129848 | 112 | 0.5713263 | 126 | 0 |
| 259 | linear    | rate | Cumulative Cigarettes (5 years)                                                                                                                                                                                                                                                    | 1.433256 | 286 | 0.5761029 | 284 | 0 |
| 260 | Spacetime | rate | Cumulative Cigarettes (5 years)                                                                                                                                                                                                                                                    | 1.298792 | 272 | 0.5741854 | 281 | 0 |
| 261 | linear    | rate | Cumulative Cigarettes (5 years), Lag distributed income per capita (log transformed)                                                                                                                                                                                               | 1.32945  | 280 | 0.5737989 | 278 | 0 |
| 262 | Spacetime | rate | Cumulative Cigarettes (5 years), Lag distributed income per capita (log transformed)                                                                                                                                                                                               | 1.246879 | 262 | 0.5730144 | 265 | 0 |
| 263 | linear    | rate | Cumulative Cigarettes (5 years), Alcohol (liters per capita)                                                                                                                                                                                                                       | 1.425263 | 285 | 0.5759434 | 283 | 0 |
| 264 | Spacetime | rate | Cumulative Cigarettes (5 years), Alcohol (liters per capita)                                                                                                                                                                                                                       | 1.299392 | 273 | 0.5740901 | 279 | 0 |
| 265 | linear    | rate | Cumulative Cigarettes (5 years), Alcohol (liters per capita), Lag distributed income per capita (log transformed)                                                                                                                                                                  | 1.321099 | 277 | 0.573753  | 277 | 0 |
| 266 | Spacetime | rate | Cumulative Cigarettes (5 years), Alcohol (liters per capita), Lag distributed income per capita (log transformed)                                                                                                                                                                  | 1.23774  | 258 | 0.5728932 | 264 | 0 |
| 267 | linear    | rate | Cumulative Cigarettes (5 years), Indoor Air Pollution (All Cooking Fuels)                                                                                                                                                                                                          | 1.340316 | 281 | 0.5737191 | 276 | 0 |
| 268 | Spacetime | rate | Cumulative Cigarettes (5 years), Indoor Air Pollution (All Cooking Fuels)                                                                                                                                                                                                          | 1.252308 | 266 | 0.5727318 | 261 | 0 |
| 269 | linear    | rate | Cumulative Cigarettes (5 years), Indoor Air Pollution (All Cooking Fuels), Education (years per capita), Lag distributed income per capita (log transformed)                                                                                                                       | 1.258911 | 268 | 0.5724273 | 247 | 0 |
| 270 | Spacetime | rate | Cumulative Cigarettes (5 years), Indoor Air Pollution (All Cooking Fuels), Education (years per capita), Lag distributed income per capita (log transformed)                                                                                                                       | 1.211302 | 251 | 0.5721417 | 237 | 0 |
| 271 | linear    | rate | Cumulative Cigarettes (5 years), Indoor Air Pollution (All Cooking Fuels), Alcohol (liters per capita)                                                                                                                                                                             | 1.325296 | 279 | 0.5734846 | 268 | 0 |
| 272 | Spacetime | rate | Cumulative Cigarettes (5 years), Indoor Air Pollution (All Cooking Fuels), Alcohol (liters per capita)                                                                                                                                                                             | 1.246365 | 261 | 0.5725672 | 254 | 0 |
| 273 | linear    | rate | Cumulative Cigarettes (5 years), Indoor Air Pollution (All Cooking Fuels), Alcohol (liters per capita), Lag distributed income per capita (log transformed)                                                                                                                        | 1.315132 | 275 | 0.5732856 | 266 | 0 |
| 274 | Spacetime | rate | Cumulative Cigarettes (5 years), Indoor Air Pollution (All Cooking Fuels), Alcohol (liters per capita), Lag distributed income per capita (log transformed)                                                                                                                        | 1.228627 | 255 | 0.5724902 | 249 | 0 |
| 275 | linear    | rate | Cumulative Cigarettes (5 years), Malnutrition - proportion <2SD weight for age (logit transformed)                                                                                                                                                                                 | 1.164752 | 211 | 0.571959  | 216 | 0 |
| 276 | Spacetime | rate | Cumulative Cigarettes (5 years), Malnutrition - proportion <2SD weight for age (logit transformed)                                                                                                                                                                                 | 1.159822 | 181 | 0.5720331 | 230 | 0 |
| 277 | linear    | rate | Cumulative Cigarettes (5 years), Malnutrition - proportion <2SD weight for age (logit transformed), Lag distributed income per capita (log transformed)                                                                                                                            | 1.173801 | 225 | 0.5719875 | 227 | 0 |
| 278 | Spacetime | rate | Cumulative Cigarettes (5 years), Malnutrition - proportion <2SD weight for age (logit transformed), Lag distributed income per capita (log transformed)                                                                                                                            | 1.16141  | 190 | 0.5720148 | 228 | 0 |
| 279 | linear    | rate | Cumulative Cigarettes (5 years), Malnutrition - proportion <2SD weight for age (logit transformed), Indoor Air Pollution (All Cooking Fuels)                                                                                                                                       | 1.164231 | 206 | 0.5719595 | 217 | 0 |
| 280 | Spacetime | rate | Cumulative Cigarettes (5 years), Malnutrition - proportion <2SD weight for age (logit transformed), Indoor Air Pollution (All Cooking Fuels)                                                                                                                                       | 1.161611 | 191 | 0.5718026 | 192 | 0 |
| 281 | linear    | rate | Cumulative Cigarettes (5 years), Malnutrition - proportion <2SD weight for age (logit transformed), Indoor Air Pollution (All Cooking Fuels), Lag distributed income per capita (log transformed)                                                                                  | 1.170935 | 223 | 0.5719277 | 213 | 0 |

|     |           |      |                                                                                                                                                                                                                                |          |     |           |     |   |
|-----|-----------|------|--------------------------------------------------------------------------------------------------------------------------------------------------------------------------------------------------------------------------------|----------|-----|-----------|-----|---|
| 282 | Spacetime | rate | Cumulative Cigarettes (5 years), Malnutrition - proportion <2SD weight for age (logit transformed), Indoor Air Pollution (All Cooking Fuels), Lag distributed income per capita (log transformed)                              | 1.162729 | 199 | 0.5718574 | 206 | 0 |
| 283 | linear    | rate | Cumulative Cigarettes (5 years), Malnutrition - proportion <2SD weight for age (logit transformed), Indoor Air Pollution (All Cooking Fuels), Alcohol (liters per capita)                                                      | 1.164475 | 210 | 0.5719676 | 223 | 0 |
| 284 | Spacetime | rate | Cumulative Cigarettes (5 years), Malnutrition - proportion <2SD weight for age (logit transformed), Indoor Air Pollution (All Cooking Fuels), Alcohol (liters per capita)                                                      | 1.162225 | 196 | 0.571699  | 167 | 0 |
| 285 | linear    | rate | Cumulative Cigarettes (5 years), Malnutrition - proportion <2SD weight for age (logit transformed), Indoor Air Pollution (All Cooking Fuels), Alcohol (liters per capita), Lag distributed income per capita (log transformed) | 1.171937 | 224 | 0.5719219 | 212 | 0 |
| 286 | Spacetime | rate | Cumulative Cigarettes (5 years), Malnutrition - proportion <2SD weight for age (logit transformed), Indoor Air Pollution (All Cooking Fuels), Alcohol (liters per capita), Lag distributed income per capita (log transformed) | 1.159616 | 179 | 0.571764  | 183 | 0 |

**Appendix Table 7: Tuberculosis mortality data sources used in the GBD 2013.**

| Country                | Source number | Source                                                                                                                                                                                                                                                       | Surveillance | Verbal Autopsy | Vital Registration |
|------------------------|---------------|--------------------------------------------------------------------------------------------------------------------------------------------------------------------------------------------------------------------------------------------------------------|--------------|----------------|--------------------|
| Albania                | 01 - ALB      | World Health Organization (WHO). WHO Mortality Database Version February 2014. Geneva, Switzerland: World Health Organization (WHO), 2014.                                                                                                                   |              |                | X                  |
| Antigua and Barbuda    | 01 - ATG      | World Health Organization (WHO). WHO Mortality Database Version February 2014. Geneva, Switzerland: World Health Organization (WHO), 2014.                                                                                                                   |              |                | X                  |
| Argentina              | 01 - ARG      | World Health Organization (WHO). WHO Mortality Database Version February 2014. Geneva, Switzerland: World Health Organization (WHO), 2014.                                                                                                                   |              |                | X                  |
| Armenia                | 01 - ARM      | World Health Organization (WHO). WHO Mortality Database Version February 2014. Geneva, Switzerland: World Health Organization (WHO), 2014.                                                                                                                   |              |                | X                  |
| Australia              | 01 - AUS      | World Health Organization (WHO). WHO Mortality Database Version February 2014. Geneva, Switzerland: World Health Organization (WHO), 2014.                                                                                                                   |              |                | X                  |
| Austria                | 01 - AUT      | World Health Organization (WHO). WHO Mortality Database Version February 2014. Geneva, Switzerland: World Health Organization (WHO), 2014.                                                                                                                   |              |                | X                  |
| Azerbaijan             | 01 - AZE      | World Health Organization (WHO). WHO Mortality Database Version February 2014. Geneva, Switzerland: World Health Organization (WHO), 2014.                                                                                                                   |              |                | X                  |
| Bahrain                | 01 - BHR      | World Health Organization (WHO). WHO Mortality Database Version February 2014. Geneva, Switzerland: World Health Organization (WHO), 2014.                                                                                                                   |              |                | X                  |
| Bangladesh             | 01 - BGD      | Hussain A, Ali SM, Kvåle G. Determinants of mortality among children in the urban slums of Dhaka city, Bangladesh. <i>Trop Med Int Health</i> . 1999; 4(11): 758-64.                                                                                         |              | X              |                    |
| Bangladesh             | 02 - BGD      | INDEPTH, International Centre for Diarrhoeal Disease Research (Bangladesh). Bangladesh - Matlab Health and Demographic Surveillance System. Dhaka, Bangladesh: International Centre for Diarrhoeal Disease Research (Bangladesh).                            |              | X              |                    |
| Bangladesh             | 03 - BGD      | INDEPTH. Bangladesh - AMK Health and Demographic Surveillance System.                                                                                                                                                                                        |              | X              |                    |
| Barbados               | 01 - BRB      | World Health Organization (WHO). WHO Mortality Database Version February 2014. Geneva, Switzerland: World Health Organization (WHO), 2014.                                                                                                                   |              |                | X                  |
| Belarus                | 01 - BLR      | World Health Organization (WHO). WHO Mortality Database Version February 2014. Geneva, Switzerland: World Health Organization (WHO), 2014.                                                                                                                   |              |                | X                  |
| Belgium                | 01 - BEL      | World Health Organization (WHO). WHO Mortality Database Version February 2014. Geneva, Switzerland: World Health Organization (WHO), 2014.                                                                                                                   |              |                | X                  |
| Belize                 | 01 - BLZ      | World Health Organization (WHO). WHO Mortality Database Version February 2014. Geneva, Switzerland: World Health Organization (WHO), 2014.                                                                                                                   |              |                | X                  |
| Bermuda                | 01 - BMU      | World Health Organization (WHO). WHO Mortality Database Version February 2014. Geneva, Switzerland: World Health Organization (WHO), 2014.                                                                                                                   |              |                | X                  |
| Bolivia                | 01 - BOL      | World Health Organization (WHO). WHO Mortality Database Version February 2014. Geneva, Switzerland: World Health Organization (WHO), 2014.                                                                                                                   |              |                | X                  |
| Bosnia and Herzegovina | 01 - BIH      | World Health Organization (WHO). WHO Mortality Database Version February 2014. Geneva, Switzerland: World Health Organization (WHO), 2014.                                                                                                                   |              |                | X                  |
| Brazil                 | 01 - BRA      | Victora CG, Barros FC, Huttly SR, Teixeira AM, Vaughan JP. Early childhood mortality in a Brazilian cohort: the roles of birthweight and socioeconomic status. <i>Int J Epidemiol</i> . 1992; 21(5): 911-5.                                                  |              | X              |                    |
| Brazil                 | 02 - BRA      | Victora CG, Smith PG, Vaughan JP, Nobre LC, Lombardi C, Teixeira AM, Fuchs SM, Moreira LB, Gigante LP, Barros FC. Evidence for protection by breast-feeding against infant deaths from infectious diseases in Brazil. <i>Lancet</i> . 1987; 2(8554): 319-22. |              | X              |                    |
| Brazil                 | 03 - BRA      | World Health Organization (WHO). WHO Mortality Database Version February 2014. Geneva, Switzerland: World Health Organization (WHO), 2014.                                                                                                                   |              |                | X                  |
| Brunei                 | 01 - BRN      | World Health Organization (WHO). WHO Mortality Database Version February 2014. Geneva, Switzerland: World Health Organization (WHO), 2014.                                                                                                                   |              |                | X                  |

|              |          |                                                                                                                                                                                                                                                                                                              |  |   |   |
|--------------|----------|--------------------------------------------------------------------------------------------------------------------------------------------------------------------------------------------------------------------------------------------------------------------------------------------------------------|--|---|---|
| Bulgaria     | 01 - BGR | World Health Organization (WHO). WHO Mortality Database Version February 2014. Geneva, Switzerland: World Health Organization (WHO), 2014.                                                                                                                                                                   |  |   | X |
| Burkina Faso | 01 - BFA | Bell JS, Ouédraogo M, Ganaba R, Sombié I, Byass P, Baggaley RF, Filippi V, Fitzmaurice AE, Graham WJ. The epidemiology of pregnancy outcomes in rural Burkina Faso. <i>Trop Med Int Health</i> . 2008; 13 Suppl 1: 31-43.                                                                                    |  | X |   |
| Burkina Faso | 02 - BFA | INDEPTH, Nouna Health Research Center (Burkina Faso). Burkina Faso - Nouna Health and Demographic Surveillance System.                                                                                                                                                                                       |  | X |   |
| Burkina Faso | 03 - BFA | Ramroth H, Lorenz E, Rankin JC, Fottrell E, Yé M, Neuhann F, Ssennono M, Sié A, Byass P, Becher H. Causas de la distribución de muerte con el modelo InterVA y la codificación de médicos en un área rural de Burkina Faso. <i>Trop Med Int Health</i> . 2012; 17(7): 904-13.                                |  | X |   |
| Burkina Faso | 04 - BFA | Würthwein R, Gbangou A, Sauerborn R, Schmidt CM. Measuring the local burden of disease. A study of years of life lost in sub-Saharan Africa. <i>Int J Epidemiol</i> . 2001; 30(3): 501-8.                                                                                                                    |  | X |   |
| Burkina Faso | 05 - BFA | Yé M, Diboulo E, Niamba L, Sié A, Coulibaly B, Bagagnan C, Dembélé J, Ramroth H. An improved method for physician-certified verbal autopsy reduces the rate of discrepancy: experiences in the Nouna Health and Demographic Surveillance Site (NHDSS), Burkina Faso. <i>Popul Health Metr</i> . 2011; 9: 34. |  | X |   |
| Cambodia     | 01 - KHM | Oum S, Chandramohan D, Cairncross S. Community-based surveillance: a pilot study from rural Cambodia. <i>Trop Med Int Health</i> . 2005; 10(7): 689-97.                                                                                                                                                      |  | X |   |
| Canada       | 01 - CAN | World Health Organization (WHO). WHO Mortality Database Version February 2014. Geneva, Switzerland: World Health Organization (WHO), 2014.                                                                                                                                                                   |  |   | X |
| Cape Verde   | 01 - CPV | Wessel H, Reitmaier P, Dupret A, Rocha E, Cnattingius S, Bergström S. Deaths among women of reproductive age in Cape Verde: causes and avoidability. <i>Acta Obstet Gynecol Scand</i> . 1999; 78(3): 225-32.                                                                                                 |  | X |   |
| Cape Verde   | 02 - CPV | World Health Organization (WHO). WHO Mortality Database Version February 2014. Geneva, Switzerland: World Health Organization (WHO), 2014.                                                                                                                                                                   |  |   | X |
| Chile        | 01 - CHL | Ministry of Health (Chile), National Institute of Statistics (Chile). Chile Vital Registration - Deaths 1985.                                                                                                                                                                                                |  |   | X |
| Chile        | 02 - CHL | World Health Organization (WHO). WHO Mortality Database Version February 2014. Geneva, Switzerland: World Health Organization (WHO), 2014.                                                                                                                                                                   |  |   | X |
| China        | 01 - CHN | Chinese Center for Disease Control and Prevention (CCDC). China Disease Surveillance Points 1991 - China CDC.                                                                                                                                                                                                |  |   | X |
| China        | 02 - CHN | Chinese Center for Disease Control and Prevention (CCDC). China Disease Surveillance Points 1993 - China CDC.                                                                                                                                                                                                |  |   | X |
| China        | 03 - CHN | Chinese Center for Disease Control and Prevention (CCDC). China Disease Surveillance Points 1994 - China CDC.                                                                                                                                                                                                |  |   | X |
| China        | 04 - CHN | Chinese Center for Disease Control and Prevention (CCDC). China Disease Surveillance Points 1995 - China CDC.                                                                                                                                                                                                |  |   | X |
| China        | 05 - CHN | Chinese Center for Disease Control and Prevention (CCDC). China Disease Surveillance Points 1996 - China CDC.                                                                                                                                                                                                |  |   | X |
| China        | 06 - CHN | Chinese Center for Disease Control and Prevention (CCDC). China Disease Surveillance Points 1997 - China CDC.                                                                                                                                                                                                |  |   | X |
| China        | 07 - CHN | Chinese Center for Disease Control and Prevention (CCDC). China Disease Surveillance Points 1998 - China CDC.                                                                                                                                                                                                |  |   | X |
| China        | 08 - CHN | Chinese Center for Disease Control and Prevention (CCDC). China Disease Surveillance Points 1999 - China CDC.                                                                                                                                                                                                |  |   | X |
| China        | 09 - CHN | Chinese Center for Disease Control and Prevention (CCDC). China Disease Surveillance Points 2000 - China CDC.                                                                                                                                                                                                |  |   | X |
| China        | 10 - CHN | Chinese Center for Disease Control and Prevention (CCDC). China Disease Surveillance Points 2001 - China CDC.                                                                                                                                                                                                |  |   | X |
| China        | 11 - CHN | Chinese Center for Disease Control and Prevention (CCDC). China Disease Surveillance Points 2002 - China CDC.                                                                                                                                                                                                |  |   | X |
| China        | 12 - CHN | Chinese Center for Disease Control and Prevention (CCDC). China Disease Surveillance Points 2004 - China CDC.                                                                                                                                                                                                |  |   | X |
| China        | 13 - CHN | Chinese Center for Disease Control and Prevention (CCDC). China Disease Surveillance Points 2005 - China CDC.                                                                                                                                                                                                |  |   | X |
| China        | 14 - CHN | Chinese Center for Disease Control and Prevention (CCDC). China Disease Surveillance Points 2006 - China CDC.                                                                                                                                                                                                |  |   | X |
| China        | 15 - CHN | Chinese Center for Disease Control and Prevention (CCDC). China Disease Surveillance Points 2007 - China CDC.                                                                                                                                                                                                |  |   | X |
| China        | 16 - CHN | Chinese Center for Disease Control and Prevention (CCDC). China Disease Surveillance Points 2008 - China CDC.                                                                                                                                                                                                |  |   | X |

|                                  |          |                                                                                                                                                                                                                           |   |   |   |
|----------------------------------|----------|---------------------------------------------------------------------------------------------------------------------------------------------------------------------------------------------------------------------------|---|---|---|
| China                            | 17 - CHN | Chinese Center for Disease Control and Prevention (CCDC). China Disease Surveillance Points 2009 - China CDC.                                                                                                             |   |   | X |
| China                            | 18 - CHN | Chinese Center for Disease Control and Prevention (CCDC). China Disease Surveillance Points 2010 - China CDC.                                                                                                             |   |   | X |
| China                            | 19 - CHN | Chinese Center for Disease Control and Prevention (CCDC). China Disease Surveillance Points 2011 - China CDC.                                                                                                             |   |   | X |
| China                            | 20 - CHN | Ministry of Health (China). China National Maternal and Child Health Surveillance System Child Mortality Data By Cause 1996-2012 - MCHS.                                                                                  | X |   |   |
| China                            | 21 - CHN | World Health Organization (WHO). WHO Mortality Database Version February 2014. Geneva, Switzerland: World Health Organization (WHO), 2014.                                                                                |   |   | X |
| Colombia                         | 01 - COL | National Administrative Department of Statistics (Colombia). Colombia Vital Statistics - Deaths 2008. Bogotá, Colombia: National Administrative Department of Statistics (Colombia).                                      |   |   | X |
| Colombia                         | 02 - COL | World Health Organization (WHO). WHO Mortality Database Version February 2014. Geneva, Switzerland: World Health Organization (WHO), 2014.                                                                                |   |   | X |
| Costa Rica                       | 01 - CRI | World Health Organization (WHO). WHO Mortality Database Version February 2014. Geneva, Switzerland: World Health Organization (WHO), 2014.                                                                                |   |   | X |
| Croatia                          | 01 - HRV | World Health Organization (WHO). WHO Mortality Database Version February 2014. Geneva, Switzerland: World Health Organization (WHO), 2014.                                                                                |   |   | X |
| Cuba                             | 01 - CUB | World Health Organization (WHO). WHO Mortality Database Version February 2014. Geneva, Switzerland: World Health Organization (WHO), 2014.                                                                                |   |   | X |
| Cyprus                           | 01 - CYP | World Health Organization (WHO). WHO Mortality Database Version February 2014. Geneva, Switzerland: World Health Organization (WHO), 2014.                                                                                |   |   | X |
| Czech Republic                   | 01 - CZE | World Health Organization (WHO). WHO Mortality Database Version February 2014. Geneva, Switzerland: World Health Organization (WHO), 2014.                                                                                |   |   | X |
| Democratic Republic of the Congo | 01 - COD | Coghlan B, Brennan RJ, Ngoy P, Dofara D, Otto B, Clements M, Stewart T. Mortality in the Democratic Republic of Congo: a nationwide survey. Lancet. 2006; 367(9504): 44-51.                                               |   | X |   |
| Denmark                          | 01 - DNK | World Health Organization (WHO). WHO Mortality Database Version February 2014. Geneva, Switzerland: World Health Organization (WHO), 2014.                                                                                |   |   | X |
| Dominica                         | 01 - DMA | World Health Organization (WHO). WHO Mortality Database Version February 2014. Geneva, Switzerland: World Health Organization (WHO), 2014.                                                                                |   |   | X |
| Dominican Republic               | 01 - DOM | World Health Organization (WHO). WHO Mortality Database Version February 2014. Geneva, Switzerland: World Health Organization (WHO), 2014.                                                                                |   |   | X |
| Eastern Cape                     | 01 - ZEC | Department of Home Affairs (South Africa), Statistics South Africa. South Africa Mortality and Causes of Death 1997-2005. Pretoria, South Africa: Statistics South Africa.                                                |   |   | X |
| Ecuador                          | 01 - ECU | World Health Organization (WHO). WHO Mortality Database Version February 2014. Geneva, Switzerland: World Health Organization (WHO), 2014.                                                                                |   |   | X |
| Egypt                            | 01 - EGY | World Health Organization (WHO). WHO Mortality Database Version February 2014. Geneva, Switzerland: World Health Organization (WHO), 2014.                                                                                |   |   | X |
| El Salvador                      | 01 - SLV | World Health Organization (WHO). WHO Mortality Database Version February 2014. Geneva, Switzerland: World Health Organization (WHO), 2014.                                                                                |   |   | X |
| Estonia                          | 01 - EST | World Health Organization (WHO). WHO Mortality Database Version February 2014. Geneva, Switzerland: World Health Organization (WHO), 2014.                                                                                |   |   | X |
| Ethiopia                         | 01 - ETH | Anteneh A, Araya T, Misganaw A. Factors associated with place of death in Addis Ababa, Ethiopia. BMC Palliat Care. 2013; 12(14): 14.                                                                                      |   | X |   |
| Ethiopia                         | 02 - ETH | Fantahun M, Fottrell E, Berhane Y, Wall S, Högberg U, Byass P. Assessing a new approach to verbal autopsy interpretation in a rural Ethiopian community: the InterVA model. Bull World Health Organ. 2006; 84(3): 204-10. |   | X |   |
| Ethiopia                         | 03 - ETH | INDEPTH. Ethiopia - Butajira Health and Demographic Surveillance System.                                                                                                                                                  |   | X |   |
| Ethiopia                         | 04 - ETH | Lulu K, Berhane Y. The use of simplified verbal autopsy in identifying causes of adult death in a predominantly rural population in Ethiopia. BMC Public Health. 2005; 5: 58.                                             |   | X |   |

|            |          |                                                                                                                                                                                                                                                                                                                                                     |  |   |   |
|------------|----------|-----------------------------------------------------------------------------------------------------------------------------------------------------------------------------------------------------------------------------------------------------------------------------------------------------------------------------------------------------|--|---|---|
| Ethiopia   | 05 - ETH | Weldearegawi B, Ashebir Y, Gebeye E, Gebregziabher T, Yohannes M, Mussa S, Berhe H, Abebe Z. Emerging chronic non-communicable diseases in rural communities of Northern Ethiopia: evidence using population-based verbal autopsy method in Kilita Awlaelo surveillance site. Health Policy Plan . 2013. [Epub ahead of print]                      |  | X |   |
| Fiji       | 01 - FJI | World Health Organization (WHO). WHO Mortality Database Version February 2014. Geneva, Switzerland: World Health Organization (WHO), 2014.                                                                                                                                                                                                          |  |   | X |
| Finland    | 01 - FIN | World Health Organization (WHO). WHO Mortality Database Version February 2014. Geneva, Switzerland: World Health Organization (WHO), 2014.                                                                                                                                                                                                          |  |   | X |
| France     | 01 - FRA | World Health Organization (WHO). WHO Mortality Database Version February 2014. Geneva, Switzerland: World Health Organization (WHO), 2014.                                                                                                                                                                                                          |  |   | X |
| Free State | 01 - ZFS | Department of Home Affairs (South Africa), Statistics South Africa. South Africa Mortality and Causes of Death 1997-2005. Pretoria, South Africa: Statistics South Africa.                                                                                                                                                                          |  |   | X |
| Gauteng    | 01 - ZGA | Department of Home Affairs (South Africa), Statistics South Africa. South Africa Mortality and Causes of Death 1997-2005. Pretoria, South Africa: Statistics South Africa.                                                                                                                                                                          |  |   | X |
| Georgia    | 01 - GEO | World Health Organization (WHO). WHO Mortality Database Version February 2014. Geneva, Switzerland: World Health Organization (WHO), 2014.                                                                                                                                                                                                          |  |   | X |
| Germany    | 01 - DEU | World Health Organization (WHO). WHO Mortality Database Version February 2014. Geneva, Switzerland: World Health Organization (WHO), 2014.                                                                                                                                                                                                          |  |   | X |
| Ghana      | 01 - GHA | Births and Deaths Registry (Ghana). Ghana - Accra Births and Deaths Registry - Deaths 2000-2007.                                                                                                                                                                                                                                                    |  |   | X |
| Ghana      | 02 - GHA | Ghana Statistical Service, Ghana Health Service, Macro International, Inc. Ghana Special Demographic and Health Survey 2007-2008. Calverton, United States: Macro International, Inc., 2010.                                                                                                                                                        |  | X |   |
| Ghana      | 03 - GHA | Hurt L, ten Asbroek A, Amenga-Etego S, Zandoh C, Danso S, Edmond K, Hurt C, Tawiah C, Hill Z, Fenty J, Owusu-Agyei S, Campbell OM, Kirkwood BR. Effect of vitamin A supplementation on cause-specific mortality in women of reproductive age in Ghana: a secondary analysis from the ObaapaViTA trial. Bull World Health Organ. 2013; 91(1): 19-27. |  | X |   |
| Ghana      | 04 - GHA | INDEPTH. Ghana - Navrongo Health and Demographic Surveillance System.                                                                                                                                                                                                                                                                               |  | X |   |
| Greece     | 01 - GRC | World Health Organization (WHO). WHO Mortality Database Version February 2014. Geneva, Switzerland: World Health Organization (WHO), 2014.                                                                                                                                                                                                          |  |   | X |
| Grenada    | 01 - GRD | World Health Organization (WHO). WHO Mortality Database Version February 2014. Geneva, Switzerland: World Health Organization (WHO), 2014.                                                                                                                                                                                                          |  |   | X |
| Guatemala  | 01 - GTM | World Health Organization (WHO). WHO Mortality Database Version February 2014. Geneva, Switzerland: World Health Organization (WHO), 2014.                                                                                                                                                                                                          |  |   | X |
| Guyana     | 01 - GUY | World Health Organization (WHO). WHO Mortality Database Version February 2014. Geneva, Switzerland: World Health Organization (WHO), 2014.                                                                                                                                                                                                          |  |   | X |
| Haiti      | 01 - HTI | World Health Organization (WHO). WHO Mortality Database Version February 2014. Geneva, Switzerland: World Health Organization (WHO), 2014.                                                                                                                                                                                                          |  |   | X |
| Honduras   | 01 - HND | World Health Organization (WHO). WHO Mortality Database Version February 2014. Geneva, Switzerland: World Health Organization (WHO), 2014.                                                                                                                                                                                                          |  |   | X |
| Hungary    | 01 - HUN | World Health Organization (WHO). WHO Mortality Database Version February 2014. Geneva, Switzerland: World Health Organization (WHO), 2014.                                                                                                                                                                                                          |  |   | X |
| Iceland    | 01 - ISL | World Health Organization (WHO). WHO Mortality Database Version February 2014. Geneva, Switzerland: World Health Organization (WHO), 2014.                                                                                                                                                                                                          |  |   | X |
| India      | 01 - IND | Byrraju Foundation, Centre for Chronic Disease Control (India), Cooperative for Assistance and Relief Everywhere (CARE), School of Population Health, University of Queensland (Australia). India - Andhra Pradesh Rural Health Initiative.                                                                                                         |  | X |   |

|       |          |                                                                                                                                                                                                                                                                                                |   |   |
|-------|----------|------------------------------------------------------------------------------------------------------------------------------------------------------------------------------------------------------------------------------------------------------------------------------------------------|---|---|
| India | 02 - IND | Dongre A, Singh A, Deshmukh P, Garg B. A community based cross sectional study on feasibility of lay interviewers in ascertaining causes of adult deaths by using verbal autopsy in rural Wardha. Online Journal of Health and Allied Sciences. 2008; 7(4): 4.                                 | X |   |
| India | 03 - IND | Gajalakshmi V, Peto R, Kanaka S, Balasubramanian S. Verbal autopsy of 48 000 adult deaths attributable to medical causes in Chennai (formerly Madras), India. BMC Public Health. 2002; 2: 7.                                                                                                   | X |   |
| India | 04 - IND | Indian Council of Medical Research (ICMR). India Study on Causes of Death by Verbal Autopsy 2003.                                                                                                                                                                                              | X |   |
| India | 05 - IND | Institute of Health Systems (India). India Cause of Death Dataset Version 1.3 1980-1998. Hyderabad, India: Institute of Health Systems (India), 2002.                                                                                                                                          | X |   |
| India | 06 - IND | International Institute for Population Sciences (IIPS) (India), Macro International, Inc. India Demographic and Health Survey 1998-1999. Calverton, United States: Macro International, Inc.                                                                                                   | X |   |
| India | 07 - IND | International Institute for Population Sciences (IIPS). India Demographic and Health Survey 1992-1993. Bombay, India: International Institute for Population Sciences (IIPS).                                                                                                                  | X |   |
| India | 08 - IND | Joshi R, Cardona M, Iyengar S, Sukumar A, Raju CR, Raju KR, Raju K, Reddy KS, Lopez A, Neal B. Chronic diseases now a leading cause of death in rural India – mortality data from the Andhra Pradesh Rural Health Initiative. Int J Epidemiol. 2006; 35(6): 1522-9.                            | X |   |
| India | 09 - IND | Kanungo S, Tsuzuki A, Deen JL, Lopez AL, Rajendran K, Manna B, Sur D, Kim DR, Gupta VK, Ochiai RL, Ali M, von Seidlein L, Bhattacharya SK, Clemens JD. Use of verbal autopsy to determine mortality patterns in an urban slum in Kolkata, India. Bull World Health Organ. 2010; 88(9): 667-74. | X |   |
| India | 10 - IND | Krishnan A, Kumar R, Nongkynrih B, Misra P, Srivastava R, Kapoor SK. Adult mortality surveillance by routine health workers using a short verbal autopsy tool in rural north India. J Epidemiol Community Health. 2012; 66(6): 501-6.                                                          | X |   |
| India | 11 - IND | Ministry of Health and Family Welfare (India), Office of the Registrar General and Census Commissioner (India). India Special Survey of Deaths 2004.                                                                                                                                           | X |   |
| India | 12 - IND | Office of the Registrar General & Census Commissioner (India). India Vital Statistics 1980. New Delhi, India: Office of the Registrar General & Census Commissioner (India).                                                                                                                   |   | X |
| India | 13 - IND | Office of the Registrar General & Census Commissioner (India). India Vital Statistics 1981. New Delhi, India: Office of the Registrar General & Census Commissioner (India).                                                                                                                   |   | X |
| India | 14 - IND | Office of the Registrar General & Census Commissioner (India). India Vital Statistics 1982. New Delhi, India: Office of the Registrar General & Census Commissioner (India).                                                                                                                   |   | X |
| India | 15 - IND | Office of the Registrar General & Census Commissioner (India). India Vital Statistics 1983. New Delhi, India: Office of the Registrar General & Census Commissioner (India).                                                                                                                   |   | X |
| India | 16 - IND | Office of the Registrar General & Census Commissioner (India). India Vital Statistics 1986. New Delhi, India: Office of the Registrar General & Census Commissioner (India).                                                                                                                   |   | X |
| India | 17 - IND | Office of the Registrar General & Census Commissioner (India). India Vital Statistics 1987. New Delhi, India: Office of the Registrar General & Census Commissioner (India).                                                                                                                   |   | X |
| India | 18 - IND | Office of the Registrar General & Census Commissioner (India). India Vital Statistics 1988. New Delhi, India: Office of the Registrar General & Census Commissioner (India).                                                                                                                   |   | X |
| India | 19 - IND | Office of the Registrar General & Census Commissioner (India). India Vital Statistics 1989. New Delhi, India: Office of the Registrar General & Census Commissioner (India).                                                                                                                   |   | X |
| India | 20 - IND | Office of the Registrar General and Census Commissioner (India). India MCCD Vital Statistics - Deaths 1990-1998.                                                                                                                                                                               |   | X |
| India | 21 - IND | Office of the Registrar General and Census Commissioner (India). India MCCD Vital Statistics - Deaths 1999-2001.                                                                                                                                                                               |   | X |
| India | 22 - IND | Office of the Registrar General and Census Commissioner (India). India Medical Certification of Cause of Death Report 2002. New Delhi, India: Office of the Registrar General and Census Commissioner (India), 2009.                                                                           |   | X |
| India | 23 - IND | Office of the Registrar General and Census Commissioner (India). India Medical Certification of Cause of Death Report 2003. New Delhi, India: Office of the Registrar General and Census Commissioner (India), 2009.                                                                           |   | X |



|            |          |                                                                                                                                                                                                                                                                                                             |   |  |   |
|------------|----------|-------------------------------------------------------------------------------------------------------------------------------------------------------------------------------------------------------------------------------------------------------------------------------------------------------------|---|--|---|
| India      | 24 - IND | Office of the Registrar General and Census Commissioner (India). India Medical Certification of Cause of Death Report 2004. New Delhi, India: Office of the Registrar General and Census Commissioner (India), 2009.                                                                                        |   |  | X |
| India      | 25 - IND | Office of the Registrar General and Census Commissioner (India). India Medical Certification of Cause of Death Report 2005. New Delhi, India: Office of the Registrar General and Census Commissioner (India), 2012.                                                                                        |   |  | X |
| India      | 26 - IND | Office of the Registrar General and Census Commissioner (India). India Medical Certification of Cause of Death Report 2006. New Delhi, India: Office of the Registrar General and Census Commissioner (India), 2012.                                                                                        |   |  | X |
| India      | 27 - IND | Office of the Registrar General and Census Commissioner (India). India Medical Certification of Cause of Death Report 2008. New Delhi, India: Office of the Registrar General and Census Commissioner (India), 2013.                                                                                        |   |  | X |
| India      | 28 - IND | Saha R, Nath A, Sharma N, Badhan SK, Ingle GK. Changing profile of disease contributing to mortality in a resettlement colony of Delhi. National Medical Journal of India. 2007; 20(3): 125-7.                                                                                                              | X |  |   |
| India      | 29 - IND | Singh RB, Fedacko J, Vargova V, Kumar A, Mohan V, Pella D, De Meester F, Wilson D. Singh's verbal autopsy questionnaire for the assessment of causes of death, social autopsy, tobacco autopsy and dietary autopsy, based on medical records and interview. Acta Cardiol. 2011; 66(4): 471-81.              | X |  |   |
| Indonesia  | 01 - IDN | National Institute of Health Research and Development (NIHRD), Ministry of Health (Indonesia). Indonesia Sample Registration System 2012, Indonesia Cause of Death Survey 2010-2011, Indonesia Mortality Registration System Strengthening Project (IMRSSP), and Indonesia Basic Health Research 2007-2008. | X |  |   |
| Iran       | 01 - IRN | Ministry of Health and Medical Education (Iran). Iran Vital Registration - Deaths 2007.                                                                                                                                                                                                                     |   |  | X |
| Iran       | 02 - IRN | Ministry of Health and Medical Education (Iran). Iran Vital Registration - Deaths 2008.                                                                                                                                                                                                                     |   |  | X |
| Iran       | 03 - IRN | Ministry of Health and Medical Education (Iran). Iran Vital Registration - Deaths 2009.                                                                                                                                                                                                                     |   |  | X |
| Iran       | 04 - IRN | Ministry of Health and Medical Education (Iran). Iran Vital Registration - Deaths 2010.                                                                                                                                                                                                                     |   |  | X |
| Iran       | 05 - IRN | World Health Organization (WHO). WHO Mortality Database Version February 2014. Geneva, Switzerland: World Health Organization (WHO), 2014.                                                                                                                                                                  |   |  | X |
| Iraq       | 01 - IRQ | World Health Organization (WHO). WHO Mortality Database Version February 2014. Geneva, Switzerland: World Health Organization (WHO), 2014.                                                                                                                                                                  |   |  | X |
| Ireland    | 01 - IRL | World Health Organization (WHO). WHO Mortality Database Version February 2014. Geneva, Switzerland: World Health Organization (WHO), 2014.                                                                                                                                                                  |   |  | X |
| Israel     | 01 - ISR | World Health Organization (WHO). WHO Mortality Database Version February 2014. Geneva, Switzerland: World Health Organization (WHO), 2014.                                                                                                                                                                  |   |  | X |
| Italy      | 01 - ITA | World Health Organization (WHO). WHO Mortality Database Version February 2014. Geneva, Switzerland: World Health Organization (WHO), 2014.                                                                                                                                                                  |   |  | X |
| Jamaica    | 01 - JAM | World Health Organization (WHO). WHO Mortality Database Version February 2014. Geneva, Switzerland: World Health Organization (WHO), 2014.                                                                                                                                                                  |   |  | X |
| Japan      | 01 - JPN | World Health Organization (WHO). WHO Mortality Database Version February 2014. Geneva, Switzerland: World Health Organization (WHO), 2014.                                                                                                                                                                  |   |  | X |
| Jordan     | 01 - JOR | World Health Organization (WHO). WHO Mortality Database Version February 2014. Geneva, Switzerland: World Health Organization (WHO), 2014.                                                                                                                                                                  |   |  | X |
| Kazakhstan | 01 - KAZ | World Health Organization (WHO). WHO Mortality Database Version February 2014. Geneva, Switzerland: World Health Organization (WHO), 2014.                                                                                                                                                                  |   |  | X |
| Kenya      | 01 - KEN | INDEPTH. Kenya - Kisumu Health and Demographic Surveillance System.                                                                                                                                                                                                                                         | X |  |   |
| Kenya      | 02 - KEN | INDEPTH. Kenya - Nairobi Health and Demographic Surveillance System.                                                                                                                                                                                                                                        | X |  |   |
| Kenya      | 03 - KEN | van Eijk AM, Adazu K, Ofware P, Vulule J, Hamel M, Slutsker L. Causes of deaths using verbal autopsy among adolescents and adults in rural western Kenya. Trop Med Int Health. 2008; 13(10): 1314-24.                                                                                                       | X |  |   |

|               |          |                                                                                                                                                                                                                                                                             |   |  |   |
|---------------|----------|-----------------------------------------------------------------------------------------------------------------------------------------------------------------------------------------------------------------------------------------------------------------------------|---|--|---|
| Kiribati      | 01 - KIR | World Health Organization (WHO). WHO Mortality Database Version February 2014. Geneva, Switzerland: World Health Organization (WHO), 2014.                                                                                                                                  |   |  | X |
| Kuwait        | 01 - KWT | World Health Organization (WHO). WHO Mortality Database Version February 2014. Geneva, Switzerland: World Health Organization (WHO), 2014.                                                                                                                                  |   |  | X |
| KwaZulu-Natal | 01 - ZKN | Department of Home Affairs (South Africa), Statistics South Africa. South Africa Mortality and Causes of Death 1997-2005. Pretoria, South Africa: Statistics South Africa.                                                                                                  |   |  | X |
| Kyrgyzstan    | 01 - KGZ | World Health Organization (WHO). WHO Mortality Database Version February 2014. Geneva, Switzerland: World Health Organization (WHO), 2014.                                                                                                                                  |   |  | X |
| Latvia        | 01 - LVA | World Health Organization (WHO). WHO Mortality Database Version February 2014. Geneva, Switzerland: World Health Organization (WHO), 2014.                                                                                                                                  |   |  | X |
| Liberia       | 01 - LBR | Pacqué-Margolis S, Pacqué M, Dukuly Z, Boateng J, Taylor HR.. Application of the verbal autopsy during a clinical trial. Soc Sci Med. 1990; 31(5): 585-91.                                                                                                                  | X |  |   |
| Limpopo       | 01 - ZLI | Department of Home Affairs (South Africa), Statistics South Africa. South Africa Mortality and Causes of Death 1997-2005. Pretoria, South Africa: Statistics South Africa.                                                                                                  |   |  | X |
| Lithuania     | 01 - LTU | World Health Organization (WHO). WHO Mortality Database Version February 2014. Geneva, Switzerland: World Health Organization (WHO), 2014.                                                                                                                                  |   |  | X |
| Luxembourg    | 01 - LUX | World Health Organization (WHO). WHO Mortality Database Version February 2014. Geneva, Switzerland: World Health Organization (WHO), 2014.                                                                                                                                  |   |  | X |
| Macedonia     | 01 - MKD | World Health Organization (WHO). WHO Mortality Database Version February 2014. Geneva, Switzerland: World Health Organization (WHO), 2014.                                                                                                                                  |   |  | X |
| Madagascar    | 01 - MDG | Population and Development Research Center (CEPED) (France). Madagascar - Antananorivo Mortality Report 1984-1995.                                                                                                                                                          |   |  | X |
| Malawi        | 01 - MWI | Cecchi F, Nyasulu P, Chandramohan D, Roberts B. Rates and causes of death in Chiradzulu District, Malawi, 2008: a key informant study. Trop Med Int Health. 2011; 16(3): 375-8.                                                                                             | X |  |   |
| Malawi        | 02 - MWI | Chihana M, Floyd S, Molesworth A, Crampin AC, Kayuni N, Price A, Zaba B, Jahn A, Mvula H, Dube A, Ngwira B, Glynn JR, French N. Adult mortality and probable cause of death in rural northern Malawi in the era of HIV treatment. Trop Med Int Health. 2012; 17(8): E74-83. | X |  |   |
| Malawi        | 03 - MWI | Jahn A, Floyd S, Crampin AC, Mvula H, Mwinuka V, Mwaiyeghele E, McGrath N, Zaba B, Fine PEM, Glynn JR. Declining child mortality in northern Malawi despite high rates of infection with HIV. Bull World Health Organ. 2010; 88: 746-53.                                    | X |  |   |
| Malaysia      | 01 - MYS | Department of Statistics (Malaysia).Vital Statistics: West Malaysia 1969. Kuala Lumpur, Malaysia:Department of Statistics (Malaysia), 1971.                                                                                                                                 |   |  | X |
| Malaysia      | 02 - MYS | World Health Organization (WHO). WHO Mortality Database Version February 2014. Geneva, Switzerland: World Health Organization (WHO), 2014.                                                                                                                                  |   |  | X |
| Maldives      | 01 - MDV | World Health Organization (WHO). WHO Mortality Database Version February 2014. Geneva, Switzerland: World Health Organization (WHO), 2014.                                                                                                                                  |   |  | X |
| Mali          | 01 - MLI | National Institute for Demographic Studies (France), Sahel Institute. Mali Twelve Years of Urban Mortality in the Sahel 1974-1985. 1988.                                                                                                                                    |   |  | X |
| Malta         | 01 - MLT | World Health Organization (WHO). WHO Mortality Database Version February 2014. Geneva, Switzerland: World Health Organization (WHO), 2014.                                                                                                                                  |   |  | X |
| Mauritius     | 01 - MUS | World Health Organization (WHO). WHO Mortality Database Version February 2014. Geneva, Switzerland: World Health Organization (WHO), 2014.                                                                                                                                  |   |  | X |
| Mexico        | 01 - MEX | Ministry of Health (Mexico), National Institute of Statistics and Geography (Mexico). Mexico Vital Registration - Deaths 1980 .                                                                                                                                             |   |  | X |
| Mexico        | 02 - MEX | Ministry of Health (Mexico), National Institute of Statistics and Geography (Mexico). Mexico Vital Registration - Deaths 1981 .                                                                                                                                             |   |  | X |
| Mexico        | 03 - MEX | Ministry of Health (Mexico), National Institute of Statistics and Geography (Mexico). Mexico Vital Registration - Deaths 1982.                                                                                                                                              |   |  | X |
| Mexico        | 04 - MEX | Ministry of Health (Mexico), National Institute of Statistics and Geography (Mexico). Mexico Vital Registration - Deaths 1983.                                                                                                                                              |   |  | X |
| Mexico        | 05 - MEX | Ministry of Health (Mexico), National Institute of Statistics and Geography (Mexico). Mexico Vital Registration - Deaths 1984.                                                                                                                                              |   |  | X |

|            |          |                                                                                                                                                                                     |  |   |   |
|------------|----------|-------------------------------------------------------------------------------------------------------------------------------------------------------------------------------------|--|---|---|
| Mexico     | 06 - MEX | Ministry of Health (Mexico), National Institute of Statistics and Geography (Mexico). Mexico Vital Registration - Deaths 1985.                                                      |  |   | X |
| Mexico     | 07 - MEX | Ministry of Health (Mexico), National Institute of Statistics and Geography (Mexico). Mexico Vital Registration - Deaths 1986.                                                      |  |   | X |
| Mexico     | 08 - MEX | Ministry of Health (Mexico), National Institute of Statistics and Geography (Mexico). Mexico Vital Registration - Deaths 1987.                                                      |  |   | X |
| Mexico     | 09 - MEX | Ministry of Health (Mexico), National Institute of Statistics and Geography (Mexico). Mexico Vital Registration - Deaths 1988.                                                      |  |   | X |
| Mexico     | 10 - MEX | Ministry of Health (Mexico), National Institute of Statistics and Geography (Mexico). Mexico Vital Registration - Deaths 1989.                                                      |  |   | X |
| Mexico     | 11 - MEX | Ministry of Health (Mexico), National Institute of Statistics and Geography (Mexico). Mexico Vital Registration - Deaths 1990.                                                      |  |   | X |
| Mexico     | 12 - MEX | Ministry of Health (Mexico), National Institute of Statistics and Geography (Mexico). Mexico Vital Registration - Deaths 1991.                                                      |  |   | X |
| Mexico     | 13 - MEX | Ministry of Health (Mexico), National Institute of Statistics and Geography (Mexico). Mexico Vital Registration - Deaths 1992.                                                      |  |   | X |
| Mexico     | 14 - MEX | Ministry of Health (Mexico), National Institute of Statistics and Geography (Mexico). Mexico Vital Registration - Deaths 1993.                                                      |  |   | X |
| Mexico     | 15 - MEX | Ministry of Health (Mexico), National Institute of Statistics and Geography (Mexico). Mexico Vital Registration - Deaths 1994.                                                      |  |   | X |
| Mexico     | 16 - MEX | Ministry of Health (Mexico), National Institute of Statistics and Geography (Mexico). Mexico Vital Registration - Deaths 1995.                                                      |  |   | X |
| Mexico     | 17 - MEX | Ministry of Health (Mexico), National Institute of Statistics and Geography (Mexico). Mexico Vital Registration - Deaths 1996.                                                      |  |   | X |
| Mexico     | 18 - MEX | Ministry of Health (Mexico), National Institute of Statistics and Geography (Mexico). Mexico Vital Registration - Deaths 1997.                                                      |  |   | X |
| Mexico     | 19 - MEX | Ministry of Health (Mexico), National Institute of Statistics and Geography (Mexico). Mexico Vital Registration - Deaths 1998.                                                      |  |   | X |
| Mexico     | 20 - MEX | Ministry of Health (Mexico), National Institute of Statistics and Geography (Mexico). Mexico Vital Registration - Deaths 1999.                                                      |  |   | X |
| Mexico     | 21 - MEX | Ministry of Health (Mexico), National Institute of Statistics and Geography (Mexico). Mexico Vital Registration - Deaths 2000.                                                      |  |   | X |
| Mexico     | 22 - MEX | Ministry of Health (Mexico), National Institute of Statistics and Geography (Mexico). Mexico Vital Registration - Deaths 2001.                                                      |  |   | X |
| Mexico     | 23 - MEX | Ministry of Health (Mexico), National Institute of Statistics and Geography (Mexico). Mexico Vital Registration - Deaths 2002.                                                      |  |   | X |
| Mexico     | 24 - MEX | Ministry of Health (Mexico), National Institute of Statistics and Geography (Mexico). Mexico Vital Registration - Deaths 2003.                                                      |  |   | X |
| Mexico     | 25 - MEX | Ministry of Health (Mexico), National Institute of Statistics and Geography (Mexico). Mexico Vital Registration - Deaths 2004.                                                      |  |   | X |
| Mexico     | 26 - MEX | Ministry of Health (Mexico), National Institute of Statistics and Geography (Mexico). Mexico Vital Registration - Deaths 2005.                                                      |  |   | X |
| Mexico     | 27 - MEX | Ministry of Health (Mexico), National Institute of Statistics and Geography (Mexico). Mexico Vital Registration - Deaths 2006.                                                      |  |   | X |
| Mexico     | 28 - MEX | Ministry of Health (Mexico), National Institute of Statistics and Geography (Mexico). Mexico Vital Registration - Deaths 2007.                                                      |  |   | X |
| Mexico     | 29 - MEX | Ministry of Health (Mexico), National Institute of Statistics and Geography (Mexico). Mexico Vital Registration - Deaths 2008.                                                      |  |   | X |
| Mexico     | 30 - MEX | Ministry of Health (Mexico), National Institute of Statistics and Geography (Mexico). Mexico Vital Registration - Deaths 2010.                                                      |  |   | X |
| Mexico     | 31 - MEX | Ministry of Health (Mexico), National Institute of Statistics and Geography (Mexico). Mexico Vital Registration - Deaths 2011.                                                      |  |   | X |
| Mexico     | 32 - MEX | National Institute of Statistics and Geography (Mexico). Mexico Vital Registration - Deaths 2012.                                                                                   |  |   | X |
| Mexico     | 33 - MEX | National Institute of Statistics and Geography (Mexico). Mexico Vital Statistics - Deaths 2009 .                                                                                    |  |   | X |
| Moldova    | 01 - MDA | World Health Organization (WHO). WHO Mortality Database Version February 2014. Geneva, Switzerland: World Health Organization (WHO), 2014.                                          |  |   | X |
| Mongolia   | 01 - MNG | World Health Organization (WHO). WHO Mortality Database Version February 2014. Geneva, Switzerland: World Health Organization (WHO), 2014.                                          |  |   | X |
| Montenegro | 01 - MNE | World Health Organization (WHO). WHO Mortality Database Version February 2014. Geneva, Switzerland: World Health Organization (WHO), 2014.                                          |  |   | X |
| Morocco    | 01 - MAR | Ministry of Public Health (Morocco). Morocco National Survey on Causes and Circumstances of Infant and Child Deaths 1988-1989. Rabat, Morocco: Ministry of Public Health (Morocco). |  | X |   |
| Morocco    | 02 - MAR | World Health Organization (WHO). WHO Mortality Database Version February 2014. Geneva, Switzerland: World Health Organization (WHO), 2014.                                          |  |   | X |

|                  |          |                                                                                                                                                                                                                                                                                                                                             |   |   |   |
|------------------|----------|---------------------------------------------------------------------------------------------------------------------------------------------------------------------------------------------------------------------------------------------------------------------------------------------------------------------------------------------|---|---|---|
| Mozambique       | 01 - MOZ | Centers for Disease Control and Prevention (CDC), MEASURE Evaluation Project, Carolina Population Center, University of North Carolina, Ministry of Health (Mozambique), National Statistics Institute (Mozambique), US Census Bureau. Mozambique National Survey on the Causes of Death 2007-2008.                                         |   | X |   |
| Mozambique       | 02 - MOZ | INDEPTH. Mozambique - Manhiça Health and Demographic Surveillance System.                                                                                                                                                                                                                                                                   |   | X |   |
| Mozambique       | 03 - MOZ | Sacarlal J, Nhacolo AQ, Sigauque B, Nhalungo DA, Abacassamo F, Sacoar CN, Aide P, Machevo S, Nhampossa T, Macete EV, Bassat Q, David C, Bardaji A, Letang E, Saúte F, Aponte JJ, Thompson R, Alonso PL. A 10 year study of the cause of death in children under 15 years in Manhiça, Mozambique. BioMed Central Public Health. 2009; 9: 67. |   | X |   |
| Mpumalanga       | 01 - ZMP | Department of Home Affairs (South Africa), Statistics South Africa. South Africa Mortality and Causes of Death 1997-2005. Pretoria, South Africa: Statistics South Africa.                                                                                                                                                                  |   |   | X |
| Myanmar          | 01 - MMR | Myint, S. Cause of death verification study in Myanmar. Presentation at: World Health Organization Regional Office for South East Asia. Regional Consultation on Mortality Statistics. 2007; New Delhi, India.                                                                                                                              |   | X |   |
| Netherlands      | 01 - NLD | World Health Organization (WHO). WHO Mortality Database Version February 2014. Geneva, Switzerland: World Health Organization (WHO), 2014.                                                                                                                                                                                                  |   |   | X |
| New Zealand      | 01 - NZL | World Health Organization (WHO). WHO Mortality Database Version February 2014. Geneva, Switzerland: World Health Organization (WHO), 2014.                                                                                                                                                                                                  |   |   | X |
| Nicaragua        | 01 - NIC | World Health Organization (WHO). WHO Mortality Database Version February 2014. Geneva, Switzerland: World Health Organization (WHO), 2014.                                                                                                                                                                                                  |   |   | X |
| Nigeria          | 01 - NGA | Ekanem EE, Asindi AA, Okoi OU. Community-based surveillance of paediatric deaths in Cross River State, Nigeria. Tropical and Geographical Medicine. 1994; 46(5): 305-8.                                                                                                                                                                     |   | X |   |
| North-West       | 01 - ZNW | Department of Home Affairs (South Africa), Statistics South Africa. South Africa Mortality and Causes of Death 1997-2005. Pretoria, South Africa: Statistics South Africa.                                                                                                                                                                  |   |   | X |
| Northern Cape    | 01 - ZNC | Department of Home Affairs (South Africa), Statistics South Africa. South Africa Mortality and Causes of Death 1997-2005. Pretoria, South Africa: Statistics South Africa.                                                                                                                                                                  |   |   | X |
| Norway           | 01 - NOR | World Health Organization (WHO). WHO Mortality Database Version February 2014. Geneva, Switzerland: World Health Organization (WHO), 2014.                                                                                                                                                                                                  |   |   | X |
| Oman             | 01 - OMN | World Health Organization (WHO). WHO Mortality Database Version February 2014. Geneva, Switzerland: World Health Organization (WHO), 2014.                                                                                                                                                                                                  |   |   | X |
| Pakistan         | 01 - PAK | National Institute of Population Studies (NIPS) (Pakistan), Macro International, Inc. Pakistan Demographic and Health Survey 2006-2007. Calverton, United States: Macro International, Inc.                                                                                                                                                 |   | X |   |
| Palestine        | 01 - PSE | World Health Organization (WHO). WHO Mortality Database Version February 2014. Geneva, Switzerland: World Health Organization (WHO), 2014.                                                                                                                                                                                                  |   |   | X |
| Panama           | 01 - PAN | World Health Organization (WHO). WHO Mortality Database Version February 2014. Geneva, Switzerland: World Health Organization (WHO), 2014.                                                                                                                                                                                                  |   |   | X |
| Papua New Guinea | 01 - PNG | Moir JS, Garner PA, Heywood PF, Alpers MP. Mortality in a rural area of Madang Province, Papua New Guinea. Ann Trop Med Parasitol. 1989; 83(3): 305-19.                                                                                                                                                                                     |   | X |   |
| Papua New Guinea | 02 - PNG | World Health Organization (WHO). WHO Mortality Database Version February 2014. Geneva, Switzerland: World Health Organization (WHO), 2014.                                                                                                                                                                                                  |   |   | X |
| Paraguay         | 01 - PRY | World Health Organization (WHO). WHO Mortality Database Version February 2014. Geneva, Switzerland: World Health Organization (WHO), 2014.                                                                                                                                                                                                  |   |   | X |
| Peru             | 01 - PER | World Health Organization (WHO). WHO Mortality Database Version February 2014. Geneva, Switzerland: World Health Organization (WHO), 2014.                                                                                                                                                                                                  |   |   | X |
| Philippines      | 01 - PHL | National Epidemiology Center, Department of Health (Philippines). Philippines Field Health Service Information System Annual Report 1993. Manila, Philippines: National Epidemiology Center, Department of Health (Philippines).                                                                                                            | X |   |   |
| Philippines      | 02 - PHL | World Health Organization (WHO). WHO Mortality Database Version February 2014. Geneva, Switzerland: World Health Organization (WHO), 2014.                                                                                                                                                                                                  |   |   | X |

|                                  |          |                                                                                                                                                                                                                                                                                         |  |   |   |
|----------------------------------|----------|-----------------------------------------------------------------------------------------------------------------------------------------------------------------------------------------------------------------------------------------------------------------------------------------|--|---|---|
| Poland                           | 01 - POL | World Health Organization (WHO). WHO Mortality Database Version February 2014. Geneva, Switzerland: World Health Organization (WHO), 2014.                                                                                                                                              |  |   | X |
| Portugal                         | 01 - PRT | World Health Organization (WHO). WHO Mortality Database Version February 2014. Geneva, Switzerland: World Health Organization (WHO), 2014.                                                                                                                                              |  |   | X |
| Puerto Rico                      | 01 - PRI | World Health Organization (WHO). WHO Mortality Database Version February 2014. Geneva, Switzerland: World Health Organization (WHO), 2014.                                                                                                                                              |  |   | X |
| Qatar                            | 01 - QAT | World Health Organization (WHO). WHO Mortality Database Version February 2014. Geneva, Switzerland: World Health Organization (WHO), 2014.                                                                                                                                              |  |   | X |
| Romania                          | 01 - ROU | World Health Organization (WHO). WHO Mortality Database Version February 2014. Geneva, Switzerland: World Health Organization (WHO), 2014.                                                                                                                                              |  |   | X |
| Russia                           | 01 - RUS | Center for Demographic Research, New Economic School (Russia). Russia Mortality Rates by Region, Age, Sex, and Cause of Death 1989-1998. Moscow, Russia: Center for Demographic Research, New Economic School (Russia).                                                                 |  |   | X |
| Russia                           | 02 - RUS | World Health Organization (WHO). WHO Mortality Database Version February 2014. Geneva, Switzerland: World Health Organization (WHO), 2014.                                                                                                                                              |  |   | X |
| Saint Lucia                      | 01 - LCA | World Health Organization (WHO). WHO Mortality Database Version February 2014. Geneva, Switzerland: World Health Organization (WHO), 2014.                                                                                                                                              |  |   | X |
| Saint Vincent and the Grenadines | 01 - VCT | World Health Organization (WHO). WHO Mortality Database Version February 2014. Geneva, Switzerland: World Health Organization (WHO), 2014.                                                                                                                                              |  |   | X |
| Sao Tome and Principe            | 01 - STP | World Health Organization (WHO). WHO Mortality Database Version February 2014. Geneva, Switzerland: World Health Organization (WHO), 2014.                                                                                                                                              |  |   | X |
| Senegal                          | 01 - SEN | Duthe G, Pison G. Adult mortality in a rural area of Senegal: Non-communicable diseases have a large impact in Mlomp. Demographic Research. 2008; 19(37): 1419-48.                                                                                                                      |  | X |   |
| Serbia                           | 01 - SRB | World Health Organization (WHO). WHO Mortality Database Version February 2014. Geneva, Switzerland: World Health Organization (WHO), 2014.                                                                                                                                              |  |   | X |
| Seychelles                       | 01 - SYC | World Health Organization (WHO). WHO Mortality Database Version February 2014. Geneva, Switzerland: World Health Organization (WHO), 2014.                                                                                                                                              |  |   | X |
| Singapore                        | 01 - SGP | World Health Organization (WHO). WHO Mortality Database Version February 2014. Geneva, Switzerland: World Health Organization (WHO), 2014.                                                                                                                                              |  |   | X |
| Slovakia                         | 01 - SVK | World Health Organization (WHO). WHO Mortality Database Version February 2014. Geneva, Switzerland: World Health Organization (WHO), 2014.                                                                                                                                              |  |   | X |
| Slovenia                         | 01 - SVN | World Health Organization (WHO). WHO Mortality Database Version February 2014. Geneva, Switzerland: World Health Organization (WHO), 2014.                                                                                                                                              |  |   | X |
| South Africa                     | 01 - ZAF | Garrib A, Jaffar S, Knight S, Bradshaw D, Bennish ML. Rates and causes of child mortality in an area of high HIV prevalence in rural South Africa. Trop Med Int Health. 2006; 11(12): 1841-8.                                                                                           |  | X |   |
| South Africa                     | 02 - ZAF | MRC/Wits Rural Public Health and Health Transitions Research Unit (Agincourt). INDEPTH. South Africa - Agincourt Health and Socio-Demographic Surveillance System.                                                                                                                      |  | X |   |
| South Africa                     | 03 - ZAF | Moyo S, Hawkrige T, Mahomed H, Workman L, Minnies D, Geiter LJ, Verver S, Kibel M, Hussey GD. Determining causes of mortality in children enrolled in a vaccine field trial in a rural area in the Western Cape Province of South Africa. J Paediatr Child Health. 2007; 43(3): 178-83. |  | X |   |
| South Africa                     | 04 - ZAF | Muhwava W. Contributions of the Africa Centre Demographic Surveillance to the Community. Umbiko . 2007; 12. 3-4.                                                                                                                                                                        |  | X |   |
| South Africa                     | 05 - ZAF | World Health Organization (WHO). WHO Mortality Database Version February 2014. Geneva, Switzerland: World Health Organization (WHO), 2014.                                                                                                                                              |  |   | X |
| South Korea                      | 01 - KOR | World Health Organization (WHO). WHO Mortality Database Version February 2014. Geneva, Switzerland: World Health Organization (WHO), 2014.                                                                                                                                              |  |   | X |

|                     |          |                                                                                                                                                                                                                                                             |   |   |   |
|---------------------|----------|-------------------------------------------------------------------------------------------------------------------------------------------------------------------------------------------------------------------------------------------------------------|---|---|---|
| Spain               | 01 - ESP | World Health Organization (WHO). WHO Mortality Database Version February 2014. Geneva, Switzerland: World Health Organization (WHO), 2014.                                                                                                                  |   |   | X |
| Sri Lanka           | 01 - LKA | Registrar General's Department (Sri Lanka). Sri Lanka Vital Statistics - Deaths 1993-1996.                                                                                                                                                                  |   |   | X |
| Sri Lanka           | 02 - LKA | World Health Organization (WHO). WHO Mortality Database Version February 2014. Geneva, Switzerland: World Health Organization (WHO), 2014.                                                                                                                  |   |   | X |
| Suriname            | 01 - SUR | World Health Organization (WHO). WHO Mortality Database Version February 2014. Geneva, Switzerland: World Health Organization (WHO), 2014.                                                                                                                  |   |   | X |
| Sweden              | 01 - SWE | World Health Organization (WHO). WHO Mortality Database Version February 2014. Geneva, Switzerland: World Health Organization (WHO), 2014.                                                                                                                  |   |   | X |
| Switzerland         | 01 - CHE | World Health Organization (WHO). WHO Mortality Database Version February 2014. Geneva, Switzerland: World Health Organization (WHO), 2014.                                                                                                                  |   |   | X |
| Syria               | 01 - SYR | World Health Organization (WHO). WHO Mortality Database Version February 2014. Geneva, Switzerland: World Health Organization (WHO), 2014.                                                                                                                  |   |   | X |
| Taiwan              | 01 - TWN | Department of Health (Taiwan). Taiwan Statistics of Causes of Death 2008.                                                                                                                                                                                   |   |   | X |
| Taiwan              | 02 - TWN | Department of Health (Taiwan). Taiwan Statistics of Causes of Death 2009.                                                                                                                                                                                   |   |   | X |
| Taiwan              | 03 - TWN | Department of Health (Taiwan). Taiwan Statistics of Causes of Death 2010.                                                                                                                                                                                   |   |   | X |
| Taiwan              | 04 - TWN | Department of Health (Taiwan). Taiwan Statistics of Causes of Death 2011.                                                                                                                                                                                   |   |   | X |
| Taiwan              | 05 - TWN | Department of Health (Taiwan). Taiwan Statistics of Causes of Death 2012.                                                                                                                                                                                   |   |   | X |
| Taiwan              | 06 - TWN | Department of Health (Taiwan). Taiwan Vital Statistics - Deaths 2007.                                                                                                                                                                                       |   |   | X |
| Tajikistan          | 01 - TJK | World Health Organization (WHO). WHO Mortality Database Version February 2014. Geneva, Switzerland: World Health Organization (WHO), 2014.                                                                                                                  |   |   | X |
| Tanzania            | 01 - TZA | INDEPTH. Tanzania - Ifakara Health and Demographic Surveillance System.                                                                                                                                                                                     |   | X |   |
| Tanzania            | 02 - TZA | INDEPTH. Tanzania - Rufiji Health and Demographic Surveillance System.                                                                                                                                                                                      |   | X |   |
| Tanzania            | 03 - TZA | Illah E, Mbaruku G, Masanja H, Kahn K. Causes and risk factors for maternal mortality in rural Tanzania--case of Rufiji Health and Demographic Surveillance Site (HDSS). Afr J Reprod Health. 2013; 17(3): 119-30.                                          | X |   |   |
| Tanzania            | 04 - TZA | Kaatano GM, Mashauri FM, Kinung'hi SM, Mwanga JR, Malima RC, Kishamawe C, Nnko SE, Magesa SM, Mboera LE. Patterns of malaria related mortality based on verbal autopsy in Muleba District, north-western Tanzania. Tanzan J Health Res. 2009; 11(4): 210-8. |   | X |   |
| Tanzania            | 05 - TZA | Ministry of Health and Social Welfare (Tanzania), Newcastle University, UK Department for International Development (DFID). Tanzania Policy Implications of Mortality Burden 1995-2001.                                                                     |   | X |   |
| Tanzania            | 06 - TZA | Narh-Bana SA, Chirwa TF, Mwanyangala MA, Nathan R. Muertes de adultos y el futuro: Un análisis causa-específico de las muertes de adultos de un estudio longitudinal en Tanzania rural 2003-2007. Trop Med Int Health. 2012; 17(11): 1396-404.              |   | X |   |
| Tanzania            | 07 - TZA | Sangber-Dery MD. The Role of Birth Order in Infant Mortality in Ifakara DSS Area in Rural Tanzania [master's thesis]. [Johannesburg, South Africa]: University of the Witwatersrand; 2009.                                                                  |   | X |   |
| Thailand            | 01 - THA | Ministry of Public Health (Thailand). Thailand Burden of Disease and Injuries 1998-1999.                                                                                                                                                                    |   | X |   |
| Thailand            | 02 - THA | World Health Organization (WHO). WHO Mortality Database Version February 2014. Geneva, Switzerland: World Health Organization (WHO), 2014.                                                                                                                  |   |   | X |
| The Bahamas         | 01 - BHS | World Health Organization (WHO). WHO Mortality Database Version February 2014. Geneva, Switzerland: World Health Organization (WHO), 2014.                                                                                                                  |   |   | X |
| Trinidad and Tobago | 01 - TTO | World Health Organization (WHO). WHO Mortality Database Version February 2014. Geneva, Switzerland: World Health Organization (WHO), 2014.                                                                                                                  |   |   | X |
| Turkey              | 01 - TUR | Baskent University, Ministry of Health (Turkey), State Institute of Statistics (Turkey). Turkey Verbal Autopsy Survey 2003.                                                                                                                                 |   | X |   |

|                |          |                                                                                                                                                                                                                                        |  |   |   |
|----------------|----------|----------------------------------------------------------------------------------------------------------------------------------------------------------------------------------------------------------------------------------------|--|---|---|
| Turkey         | 02 - TUR | Demir A, Kalyoncu A, Selcuk T, Artvinli M, Sahin A. Prevalence of Asthma, Allergy, and Respiratory Symptoms in Hasançelebi/Hekimhan/Malatya in Eastern Turkey. Turkish Respiratory Journal. 2001; 2(2): 29-34.                         |  | X |   |
| Turkey         | 03 - TUR | Turkish Statistical Institute. Turkey Causes of Death Statistics 2010-2012. Ankara Turkey: Turkish Statistical Institute.                                                                                                              |  |   | X |
| Turkey         | 04 - TUR | World Health Organization (WHO). WHO Mortality Database Version February 2014. Geneva, Switzerland: World Health Organization (WHO), 2014.                                                                                             |  |   | X |
| Turkmenistan   | 01 - TKM | World Health Organization (WHO). WHO Mortality Database Version February 2014. Geneva, Switzerland: World Health Organization (WHO), 2014.                                                                                             |  |   | X |
| Uganda         | 01 - UGA | MEASURE Evaluation Project, Carolina Population Center, University of North Carolina, Macro International, Inc, Uganda Bureau of Statistics. Uganda Child Verbal Autopsy Study 2007. Macro International, Inc.                         |  | X |   |
| Ukraine        | 01 - UKR | World Health Organization (WHO). WHO Mortality Database Version February 2014. Geneva, Switzerland: World Health Organization (WHO), 2014.                                                                                             |  |   | X |
| United Kingdom | 01 - GBR | National Records of Scotland. United Kingdom - Scotland Vital Events Reference Tables 2011. Edinburgh, Scotland: National Records of Scotland.                                                                                         |  |   | X |
| United Kingdom | 02 - GBR | National Records of Scotland. United Kingdom - Scotland Vital Events Reference Tables 2012. Edinburgh, Scotland: National Records of Scotland.                                                                                         |  |   | X |
| United Kingdom | 03 - GBR | Northern Ireland Statistics and Research Agency (NISRA). United Kingdom - Northern Ireland Registrar General Annual Report 2011. Belfast, Northern Ireland: Northern Ireland Statistics and Research Agency (NISRA), 2012.             |  |   | X |
| United Kingdom | 04 - GBR | Office for National Statistics (United Kingdom). United Kingdom - England and Wales Mortality Data 1981-1994. Newport, United Kingdom: Office for National Statistics (United Kingdom).                                                |  |   | X |
| United Kingdom | 05 - GBR | Office for National Statistics (United Kingdom). United Kingdom - England and Wales Mortality Data 1995-2000. Newport, United Kingdom: Office for National Statistics (United Kingdom).                                                |  |   | X |
| United Kingdom | 06 - GBR | Office for National Statistics (United Kingdom). United Kingdom - England and Wales Mortality Data 2001-2012. Newport, United Kingdom: Office for National Statistics (United Kingdom).                                                |  |   | X |
| United Kingdom | 07 - GBR | World Health Organization (WHO). WHO Mortality Database Version February 2014. Geneva, Switzerland: World Health Organization (WHO), 2014.                                                                                             |  |   | X |
| United States  | 01 - USA | World Health Organization (WHO). WHO Mortality Database Version February 2014. Geneva, Switzerland: World Health Organization (WHO), 2014.                                                                                             |  |   | X |
| Uruguay        | 01 - URY | World Health Organization (WHO). WHO Mortality Database Version February 2014. Geneva, Switzerland: World Health Organization (WHO), 2014.                                                                                             |  |   | X |
| Uzbekistan     | 01 - UZB | World Health Organization (WHO). WHO Mortality Database Version February 2014. Geneva, Switzerland: World Health Organization (WHO), 2014.                                                                                             |  |   | X |
| Venezuela      | 01 - VEN | World Health Organization (WHO). WHO Mortality Database Version February 2014. Geneva, Switzerland: World Health Organization (WHO), 2014.                                                                                             |  |   | X |
| Vietnam        | 01 - VNM | Hanoi School of Public Health, Ministry of Health (Viet Nam), School of Population Health, University of Queensland (Australia). Vietnam Burden of Disease and Injury Study 2008. Hanoi, Vietnam: Hanoi School of Public Health, 2011. |  | X |   |
| Vietnam        | 02 - VNM | Hoa NP, Rao C, Hoy DG, Hinh ND, Chuc NT, Ngo DA. Mortality measures from sample-based surveillance: evidence of the epidemiological transition in Viet Nam Bull World Health Organ. 2012; 90(10): 764-72.                              |  | X |   |
| Vietnam        | 03 - VNM | Ngo AD, Rao C, Hoa NP, Adair T, Chuc NTK. Mortality patterns in Vietnam, 2006: Findings from a national verbal autopsy survey. BMC Res Notes. 2010; 3: 78.                                                                             |  | X |   |
| Vietnam        | 04 - VNM | Quyen BTT, Nhung NT, Cuong PV. The causes of deaths in Chililab between 2008-2010 based on verbal autopsy method. Vietnam Journal of Public Health. 2012; 1(1): 24-31.                                                                 |  | X |   |
| Western Cape   | 01 - ZWC | Department of Home Affairs (South Africa), Statistics South Africa. South Africa Mortality and Causes of Death 1997-2005. Pretoria, South Africa: Statistics South Africa.                                                             |  |   | X |

|          |          |                                                                                                                                                                                                                                                                                                                           |  |   |   |
|----------|----------|---------------------------------------------------------------------------------------------------------------------------------------------------------------------------------------------------------------------------------------------------------------------------------------------------------------------------|--|---|---|
| Zambia   | 01 - ZMB | Mudenda SS, Kamocha S, Mswia R, Conkling M, Sikanyiti P, Potter D, Mayaka WC, Marx MA. Feasibility of using a WHO-standard methodology for Sample Vital Registration with Verbal Autopsy (SAVVY) to report leading causes of death in Zambia: results of a pilot in four provinces, 2010. Popul Health Metr. 2011; 9: 40. |  | X |   |
| Zimbabwe | 01 - ZWE | Registrar General's Department (Zimbabwe), Zimbabwe National Statistics Agency. Zimbabwe Mortality Report 2007.                                                                                                                                                                                                           |  |   | X |
| Zimbabwe | 02 - ZWE | World Health Organization (WHO). WHO Mortality Database Version February 2014. Geneva, Switzerland: World Health Organization (WHO), 2014.                                                                                                                                                                                |  |   | X |



**Appendix Table 8. Covariates used in CODEm for tuberculosis - Males and Females**

| Covariate                                                                                             | Direction | Level |
|-------------------------------------------------------------------------------------------------------|-----------|-------|
| Cumulative Cigarettes (5 years)                                                                       | 1         | 1     |
| Diabetes Fasting Plasma Glucose (mmol/L)                                                              | 1         | 1     |
| Health system access (unitless)                                                                       | -1        | 1     |
| Indoor Air Pollution (All Cooking Fuels)                                                              | 1         | 1     |
| Malnutrition in children under 5 years - proportion > 2SD below mean weight for age (logit transform) | -1        | 1     |
| Smoking Prevalence                                                                                    | 1         | 1     |
| Alcohol (liters per capita)                                                                           | 1         | 2     |
| Population Density (500-1,000 ppl/sqkm, proportion)                                                   | 1         | 2     |
| Population Density (over 1,000 ppl/sqkm, proportion)                                                  | 1         | 2     |
| Education (years per capita)                                                                          | -1        | 3     |
| Lag distributed income per capita (log transformed)                                                   | -1        | 3     |

## Appendix Table 9: Tuberculosis data sources used in the DisMod-MR 2.0 for the GBD 2013

- Aditama TY. Prevalence of tuberculosis in Indonesia, Singapore, Brunei Darussalam and the Philippines. *Tubercle*. 1991; 72(4): 255-60.
- Al-Kassimi FA, Abdullah AK, Al-Hajjaj MS, Al-Orainey IO, Bamgboye EA, Chowdhury MNH. Nationwide community survey of tuberculosis epidemiology in Saudi Arabia. *Tuber Lung Dis*. 1993; 74(4): 254-60.
- of tuberculosis, HIV and respiratory symptoms in two Zambian communities: implications for tuberculosis control in the era of HIV. *PLoS One*. 2009; 4(5): e5602.
- Bangladesh Rural Advancement Committee (BRAC), Damien Foundation, International Centre for Diarrhoeal Disease Research (Bangladesh), KNCV Tuberculosis Foundation, World Health Organization (WHO). Bangladesh Tuberculosis Disease-cum-Infection Prevalence Survey 2007-2009.
- Berhe, Gebretsadik, Enqueselassie, Fikre, Hailu, Elena, Mekonnen, Wondale, Teklu, Tsigemariam, Gebretsadik, Ataklti, Berhe, Rezene, Haile, Tweodros, Aseffa, Abraham. Population-based prevalence survey of tuberculosis in the Tigray region of Ethiopia. *BMC Infect Dis*. 2013; 448.
- Bhat J, Rao VG, Gopi PG, Yadav R, Selvakumar N, Tiwari B, Gadge V, Bhondeley MK, Wares F. Prevalence of pulmonary tuberculosis amongst the tribal population of Madhya Pradesh, central India. *Int J Epidemiol*. 2009; 38(4): 1026-32.
- Chadha VK, Kumar P, Anjinappa SM, Singh S, Narasimhaiah S, Joshi MV, Gupta J, Lakshminarayana, Ramchandra J, Velu M, Papkianathan S, Babu S, Krishna H. Prevalence of pulmonary tuberculosis among adults in a rural sub-district of South India. *PLoS One*. 2012; 7(8): e42625.
- Chadha VK. Tuberculosis epidemiology in India: a review. *The International Journal of Tuberculosis and Lung Disease*. 2005; 9(10): 1072-82.
- Chakma T, Rao PV, Pall S, Kaushal LS, Datta M, Tiwary RS. Survey of pulmonary tuberculosis in a primitive tribe of Madhya Pradesh. *Indian J Tuberc*. 1996; 43(4): 233-40.
- China National Random Tuberculosis Survey 2000
- China Tuberculosis Prevalence Survey 2010
- Chinese Center for Disease Control and Prevention (CCDC). China National Tuberculosis Survey 1984-1985.
- Chinese Center for Disease Control and Prevention (CCDC). China National Tuberculosis Survey 1990.
- Chinese Center for Disease Control and Prevention (CCDC). China Notifiable Infectious Diseases 2004.
- Chinese Center for Disease Control and Prevention (CCDC). China Notifiable Infectious Diseases 2007.
- Chinese Center for Disease Control and Prevention (CCDC). China Notifiable Infectious Diseases 2010.
- Citation being researched
- Datta M, Gopi PG, Appegowda BN, Bhima Rao KR, Gopalan BN. Tuberculosis in North Arcot District of Tamil Nadu - a sample survey. *Indian J Tuberc*. 2000; 47(3): 147-54.
- Department of Health (Taiwan). Taiwan Tuberculosis Control Report 2007. Taipei City, Taiwan: Department of Health (Taiwan), 2007.
- Department of Health (Taiwan). Taiwan Tuberculosis Control Report 2008. Taipei City, Taiwan: Department of Health (Taiwan), 2008.
- Department of Health (Taiwan). Taiwan Tuberculosis Control Report 2009. Taipei City, Taiwan: Department of Health (Taiwan), 2009.
- Department of Health (Taiwan). Taiwan Tuberculosis Control Report 2010. Taipei City, Taiwan: Department of Health (Taiwan), 2010.
- Department of Health (Taiwan). Taiwan Tuberculosis Control Report 2012. Taipei City, Taiwan: Department of Health (Taiwan), 2012.
- 2010-2011.
- Gopi PG, Subramani R, Radhakrishna S, Kolappan C, Sadacharam K, Devi TS, Frieden TR, Narayanan PR. A baseline survey of the prevalence of tuberculosis in a community in south India at the commencement of a DOTS programme. *Int J Tuberc Lung Dis*. 2003; 7(12): 1154-62.
- Health Protection Agency (United Kingdom). United Kingdom Tuberculosis Surveillance Report 2010. London, England: Health Protection Agency (United Kingdom), 2010.
- Hoa NB, Sy DN, Nhung NV, Tiemersma EW, Borgdorff MW, Cobelens FGJ. National survey of tuberculosis prevalence in Viet Nam. *Bull World Health Organ*. 2010; 88(4): 273-80.
- 36.
- Institute for Health Metrics and Evaluation (IHME). IHME Custom Tuberculosis Excess Mortality Estimates 1950-2013.
- Institute for Health Metrics and Evaluation (IHME). IHME Custom Tuberculosis Mortality Estimates 1980-2013.
- Institute for Health Metrics and Evaluation (IHME). IHME Custom Tuberculosis Remission Estimates 1980-2013.
- Jamaica Vital Registration - Deaths 1998.
- Japan International Cooperation Agency, Ministry of Health (Cambodia), National Center for Tuberculosis and Leprosy Control (CENAT) (Cambodia). Cambodia National Tuberculosis Prevalence Survey 2010-2011.
- KNCV Tuberculosis Foundation, Ministry of Inter Provincial Coordination (Pakistan), National Tuberculosis Control Program (Pakistan). Pakistan Prevalence of Pulmonary Tuberculosis Among the Adult Population 2010-2011.
- the prevalence of pulmonary tuberculosis over a period of seven and half years in a rural community in south India with DOTS. *Indian J Tuberc*. 2013; 60(3): 168-76.
- Ministry of Health (Cambodia). Cambodia National Tuberculosis Prevalence Survey 2002.
- Ministry of Health (Laos). Laos Tuberculosis Prevalence Survey 2010-2011. 2014.
- Ministry of Health (Myanmar). Myanmar National Tuberculosis Prevalence Survey 2009-2010.
- Ministry of Health (Nigeria). Nigeria National Tuberculosis Survey 2012.
- Ministry of Health and Social Welfare (Gambia). Gambia National Tuberculosis Prevalence Survey 2011-2012.
- Ministry of Health and Social Welfare (Tanzania). Tanzania Tuberculosis Prevalence Survey 2012.
- Ministry of Public Health (Thailand). Thailand National Tuberculosis Survey 2012. 2013.
- 1999; 113.
- Onozaki I. Prevalence Survey Global Overview: Background, Survey results since 2007, Lessons and Implications to the Program. Presented at: WHO Multi-country Global Workshop on TB Prevalence Surveys and TB Surveillance; 2013 April 29 - May 3; Accra, Ghana. PowerPoint presentation.
- Rao VG, Bhat J, Yadav R, Gopalan GP, Nagamiah S, Bhondeley MK, Anjinappa SM, Ramchandra J, Chadha VK, Wares F. Prevalence of Pulmonary Tuberculosis - A Baseline Survey in Central India. *PLoS One*. 2012; 7(8): e43225.
- Rwanda Biomedical Center. Rwanda National Tuberculosis Prevalence Survey 2012.

Sebhatu M, Kiflom B, Seyoum M, Kassim N, Negash T, Tesfazion A, Borgdorff MW, van der Werf MJ. Determining the burden of tuberculosis in Eritrea: a new approach. *Bull World Health Organ.* 2007; 85(8): 593-9.

Soemantri S, Senewe FP, Tjandrarini DH, Day R, Basri C, Manissero D, Mehta F, Dye C. Three-fold reduction in the prevalence of tuberculosis over 25 years in Indonesia. *Int J Tuberc Lung Dis.* 2007; 11(4): 398-404.

Tadesse, Takele, Demissie, Meaza, Berhane, Yemane, Kebede, Yigzaw, Abebe, Markos. Two-Thirds of Smear-Positive Tuberculosis Cases in teh Community Were Undiagnosed in Northwest Ethiopia: Population Based Cross-Sectional Study. *PLoS One.* 2011; 6(12): e28258.

Thailand Tuberculosis Country Update 2012

Tupasi TE, Radhakrishna S, Chua JA, Mangubat NV, Guilatco R, Galipot M, Ramos G, Quelapio MID, Beltran G, Legaspi J, Vianzon RG, Lagahid J. Significant decline in the tuberculosis burden in the Philippines ten years after initiating DOTS. *Int J Tuberc Lung Dis.* 2009; 13(10): 1224-30.

Sarmiento A, Solon M, Solon FS, Mantala MJ. The 1997 Nationwide Tuberculosis Prevalence Survey in the Philippines. *Int J Tuberc Lung Dis.* 1999; 3(6): 471-7.

Van't Hoog AH, Laserson KF, Githui WA, Meme HK, Agaya JA, Odeny LO, Muchiri BG, Marston BJ, DeCock KM, Borgdorff MW. High prevalence of pulmonary tuberculosis and inadequate case finding in rural western Kenya. *Am J Respir Crit Care Med.* 2011; 183(9): 1245-53.

World Health Organization (WHO). WHO Tuberculosis Case Notifications.

Yadav R, Rao VG, Bhat J, Gopi PG, Selvakumar N, Wares DF. Prevalence of pulmonary tuberculosis amongst the Baigas-- a primitive tribe of Madhya Pradesh, Central India. *Indian J Tuberc.* 2010; 57(2): 114-6.

Zaman K, Yunus M, Arifeen SE, Baqui AH, Sack DA, Hossain S, Rahim Z, Ali M, Banu S, Islam MA, Begum N, Begum V, Breiman RF, Black RE. Prevalence of sputum smear-positive tuberculosis in a rural area in Bangladesh. *Epidemiol. Infect.* 2006; 134(5): 1052-9.

Zuluaga L, Betancur C, Abaunza M, Londoño J. Prevalences of tuberculosis and other respiratory diseases among people over age 15 in the northeast sector of Medellín, Colombia. *Bull Pan Am Health Organ.* 1992; 26(3): 247-55.

Appendix Table 10. Age-standardized tuberculosis all forms incidence, prevalence, and mortality rates (per 100 000) and annualized rates of change (%), with 95% UI, for 21 GBD regions.

| Location                     | Age-standardized rates<br>(per 100 000), 2013 |                                 |                             | Annualized rate of change (%) |                           |                            |                           |                           |                           |
|------------------------------|-----------------------------------------------|---------------------------------|-----------------------------|-------------------------------|---------------------------|----------------------------|---------------------------|---------------------------|---------------------------|
|                              | Incidence                                     | Prevalence                      | Mortality                   | 1990-2000                     |                           |                            | 2000-2013                 |                           |                           |
|                              |                                               |                                 |                             | Incidence                     | Prevalence                | Mortality                  | Incidence                 | Prevalence                | Mortality                 |
| Global                       | 105.20<br>(102.78 to 107.63)                  | 168.28<br>(163.99 to 172.88)    | 20.40<br>(18.65 to 22.15)   | 0.55<br>(0.37 to 0.73)        | 0.84<br>(0.70 to 0.98)    | -2.84<br>(-3.58 to -2.19)  | -0.69<br>(-0.80 to -0.59) | -1.37<br>(-1.47 to -1.27) | -3.71<br>(-4.37 to -3.04) |
| Asia Pacific, High Income    | 34.37<br>(33.43 to 35.27)                     | 62.81<br>(59.37 to 66.58)       | 2.15<br>(1.92 to 2.60)      | -0.04<br>(-0.27 to 0.20)      | -1.64<br>(-1.99 to -1.30) | -6.22<br>(-6.84 to -5.42)  | 0.11<br>(-0.05 to 0.27)   | 0.13<br>(-0.18 to 0.40)   | -5.02<br>(-5.84 to -3.98) |
| Asia, Central                | 122.60<br>(118.97 to 126.17)                  | 180.02<br>(173.14 to 187.40)    | 11.26<br>(8.06 to 12.83)    | 1.05<br>(0.80 to 1.34)        | 1.05<br>(0.84 to 1.28)    | 5.56<br>(0.73 to 6.57)     | -0.75<br>(-0.91 to -0.57) | -0.67<br>(-0.84 to -0.49) | -4.91<br>(-5.75 to -4.00) |
| Asia, East                   | 74.21<br>(71.97 to 76.60)                     | 130.78<br>(125.30 to 136.75)    | 3.49<br>(3.04 to 4.03)      | 0.23<br>(-0.08 to 0.60)       | 0.68<br>(0.34 to 1.01)    | -6.67<br>(-7.91 to -5.70)  | -2.08<br>(-2.36 to -1.85) | -3.16<br>(-3.43 to -2.86) | -7.47<br>(-8.44 to -6.56) |
| Asia, South                  | 167.29<br>(161.51 to 173.08)                  | 267.33<br>(258.06 to 276.80)    | 51.89<br>(44.11 to 60.13)   | -0.67<br>(-1.02 to -0.30)     | 0.14<br>(-0.13 to 0.41)   | -4.78<br>(-6.03 to -3.54)  | -1.22<br>(-1.44 to -0.98) | -2.61<br>(-2.81 to -2.41) | -4.35<br>(-5.76 to -3.03) |
| Asia, Southeast              | 146.46<br>(142.69 to 150.07)                  | 303.73<br>(294.27 to 314.15)    | 42.32<br>(34.93 to 47.63)   | 1.70<br>(1.49 to 1.94)        | 1.56<br>(1.36 to 1.75)    | -3.98<br>(-4.78 to -3.10)  | -0.59<br>(-0.71 to -0.47) | 0.06<br>(-0.08 to 0.21)   | -3.62<br>(-4.38 to -2.86) |
| Australasia                  | 6.39<br>(6.17 to 6.59)                        | 11.12<br>(10.49 to 11.80)       | 0.26<br>(0.22 to 0.29)      | -0.25<br>(-0.62 to 0.14)      | -1.01<br>(-1.38 to -0.61) | -5.69<br>(-6.54 to -4.82)  | -0.22<br>(-0.41 to -0.03) | -0.36<br>(-0.66 to -0.08) | -3.88<br>(-4.82 to -2.95) |
| Caribbean                    | 57.71<br>(56.27 to 59.14)                     | 73.37<br>(71.25 to 75.66)       | 8.59<br>(7.60 to 10.80)     | 2.17<br>(1.89 to 2.41)        | 1.07<br>(0.88 to 1.27)    | -4.33<br>(-5.34 to -3.04)  | -0.48<br>(-0.59 to -0.35) | -1.36<br>(-1.50 to -1.21) | -4.76<br>(-5.61 to -3.46) |
| Europe, Central              | 26.73<br>(25.98 to 27.48)                     | 41.99<br>(40.55 to 43.47)       | 1.72<br>(1.59 to 2.00)      | 1.58<br>(1.40 to 1.75)        | 0.41<br>(0.26 to 0.56)    | -2.72<br>(-3.12 to -1.93)  | -1.61<br>(-1.74 to -1.50) | -0.30<br>(-0.42 to -0.17) | -5.90<br>(-6.37 to -5.24) |
| Europe, Eastern              | 81.18<br>(78.29 to 83.70)                     | 121.42<br>(116.78 to 126.47)    | 8.59<br>(5.99 to 9.32)      | 1.43<br>(1.10 to 1.79)        | 1.83<br>(1.51 to 2.13)    | 8.33<br>(5.54 to 9.13)     | -0.49<br>(-0.73 to -0.32) | -0.66<br>(-0.88 to -0.46) | -4.28<br>(-6.75 to -3.51) |
| Europe, Western              | 10.87<br>(10.55 to 11.18)                     | 17.29<br>(16.60 to 17.96)       | 0.60<br>(0.55 to 0.70)      | -0.26<br>(-0.41 to -0.05)     | -0.75<br>(-0.90 to -0.59) | -4.79<br>(-5.23 to -4.39)  | -1.19<br>(-1.29 to -1.09) | -0.65<br>(-0.79 to -0.54) | -4.95<br>(-5.54 to -3.88) |
| Latin America, Andean        | 118.36<br>(114.40 to 122.53)                  | 161.77<br>(154.00 to 169.61)    | 9.61<br>(8.41 to 12.18)     | 0.07<br>(-0.24 to 0.40)       | -0.83<br>(-1.11 to -0.54) | -8.00<br>(-8.83 to -5.66)  | -0.84<br>(-1.06 to -0.58) | -0.81<br>(-1.08 to -0.55) | -4.87<br>(-5.89 to -3.82) |
| Latin America, Central       | 32.66<br>(31.89 to 33.47)                     | 49.61<br>(48.21 to 51.18)       | 3.62<br>(3.35 to 4.52)      | 0.82<br>(0.58 to 0.98)        | -0.33<br>(-0.55 to -0.13) | -6.67<br>(-7.07 to -5.63)  | -1.74<br>(-1.87 to -1.60) | -1.56<br>(-1.72 to -1.40) | -4.47<br>(-5.02 to -3.33) |
| Latin America, Southern      | 26.69<br>(25.93 to 27.45)                     | 38.97<br>(37.30 to 40.69)       | 2.23<br>(2.03 to 2.48)      | 1.47<br>(1.10 to 1.82)        | -0.02<br>(-0.31 to 0.27)  | -4.06<br>(-5.09 to -3.49)  | -2.59<br>(-2.77 to -2.40) | -1.58<br>(-1.80 to -1.34) | -3.46<br>(-4.09 to -2.85) |
| Latin America, Tropical      | 53.22<br>(51.38 to 54.93)                     | 92.60<br>(87.25 to 97.98)       | 3.53<br>(2.68 to 3.95)      | 0.51<br>(0.06 to 0.95)        | -0.12<br>(-0.50 to 0.29)  | -2.32<br>(-6.02 to -1.41)  | -1.31<br>(-1.53 to -1.12) | -0.73<br>(-1.09 to -0.40) | -4.31<br>(-5.25 to -3.52) |
| North Africa and Middle East | 34.55<br>(33.77 to 35.37)                     | 48.11<br>(46.59 to 49.65)       | 4.66<br>(4.19 to 5.46)      | 1.09<br>(0.87 to 1.31)        | -0.30<br>(-0.49 to -0.10) | -3.62<br>(-4.26 to -2.98)  | -1.11<br>(-1.19 to -1.03) | -1.26<br>(-1.35 to -1.17) | -4.50<br>(-5.24 to -3.83) |
| North America, High Income   | 5.04<br>(4.86 to 5.22)                        | 10.09<br>(9.53 to 10.67)        | 0.36<br>(0.29 to 0.52)      | -0.82<br>(-1.05 to -0.58)     | -2.36<br>(-2.69 to -2.06) | -9.36<br>(-10.92 to -6.27) | -3.33<br>(-3.57 to -3.12) | -2.29<br>(-2.58 to -1.99) | -4.37<br>(-5.66 to -2.51) |
| Oceania                      | 110.92<br>(107.85 to 114.09)                  | 177.04<br>(169.85 to 184.80)    | 21.40<br>(14.06 to 41.69)   | -0.57<br>(-0.96 to -0.22)     | -0.69<br>(-1.02 to -0.35) | -5.84<br>(-8.01 to -2.27)  | 0.74<br>(0.57 to 0.93)    | 0.10<br>(-0.12 to 0.32)   | -2.85<br>(-4.40 to -0.94) |
| Sub-Saharan Africa, Central  | 311.39<br>(301.15 to 321.85)                  | 529.80<br>(503.07 to 560.25)    | 106.64<br>(86.58 to 124.55) | 0.98<br>(0.54 to 1.41)        | 0.67<br>(0.30 to 1.05)    | 0.07<br>(-1.10 to 1.39)    | -0.24<br>(-0.40 to -0.06) | -0.46<br>(-0.67 to -0.27) | -3.49<br>(-4.66 to -2.16) |
| Sub-Saharan Africa, East     | 245.00<br>(237.13 to 252.61)                  | 374.70<br>(360.50 to 389.45)    | 107.23<br>(93.11 to 115.46) | 0.54<br>(0.35 to 0.74)        | 0.56<br>(0.35 to 0.78)    | 0.39<br>(-0.76 to 1.11)    | -1.20<br>(-1.31 to -1.08) | -1.24<br>(-1.37 to -1.10) | -3.41<br>(-4.28 to -2.82) |
| Sub-Saharan Africa, Southern | 1121.35<br>(1081.17 to 1164.24)               | 1470.51<br>(1416.58 to 1529.67) | 94.34<br>(83.55 to 104.87)  | -0.44<br>(-0.97 to 0.13)      | 0.54<br>(0.16 to 0.92)    | 3.40<br>(1.84 to 4.74)     | -0.07<br>(-0.42 to 0.26)  | -0.33<br>(-0.60 to -0.04) | -2.64<br>(-3.99 to -1.73) |
| Sub-Saharan Africa, West     | 173.93<br>(168.60 to 179.56)                  | 297.82<br>(287.64 to 309.58)    | 55.60<br>(48.98 to 62.37)   | 0.78<br>(0.52 to 1.04)        | 0.67<br>(0.44 to 0.89)    | 0.05<br>(-0.72 to 0.80)    | -0.76<br>(-0.89 to -0.62) | -0.87<br>(-1.00 to -0.73) | -2.88<br>(-3.52 to -2.05) |

## Appendix Table 11: Malaria non-fatal data sources used in DisMod in the GBD 2013

- Abeysinghe RR, Galappaththy GNL, Smith Gueye C, Kahn JG, Feachem RGA. Malaria control and elimination in Sri Lanka: documenting progress and success factors in a conflict setting. *PLoS One*. 2012; 7(8): e43162. .
- Alonso PL, Smith T, Schellenberg JR, Masanja H, Mwankusye S, Urassa H, Bastos de Azevedo I, Chongela J, Kobero S, Menendez C. Randomised trial of efficacy of SPf66 vaccine against *Plasmodium falciparum* malaria in children in southern Tanzania. *Lancet*. 1994; 344(8931): 1175-81.
- Alves FP, Durlacher RR, Menezes MJ, Krieger H, Silva LHP, Camargo EP. High prevalence of asymptomatic *Plasmodium vivax* and *Plasmodium falciparum* infections in native Amazonian populations. *Am J Trop Med Hyg*. 2002; 66(6): 641-8.
- Bhatt RM, Sharma SN, Urugayala S, Dash AP, Kamaraju R. Effectiveness and durability of Interceptor® long-lasting insecticidal nets in a malaria endemic area of central India. *Malar J*. 2012; 189. .
- Bloiland PB, Boriga DA, Ruebush TK, McCormick JB, Roberts JM, Oloo AJ, Hawley W, Lal A, Nahlen B, Campbell CC. Longitudinal cohort study of the epidemiology of malaria infections in an area of intense malaria transmission II. Descriptive epidemiology of malaria infection and disease among children. *Am J Trop Med Hyg*. 1999; 60(4): 641-8.
- Boisier P, Jambou R, Raharimalala L, Roux J. Relationship between parasite density and fever risk in a community exposed to a low level of malaria transmission in Madagascar highlands. *Am J Trop Med Hyg*. 2002; 67(2): 137-40.
- Camargo LM, Ferreira MU, Krieger H, De Camargo EP, Da Silva LP. Unstable hypoendemic malaria in Rondonia (western Amazon region, Brazil): epidemic outbreaks and work-associated incidence in an agro-industrial rural settlement. *Am J Trop Med Hyg*. 1994; 51(1): 16-25.
- Cardoso MA, Ferreira MU, Camargo LM, Szarfarc SC. Anaemia, iron deficiency and malaria in a rural community in Brazilian Amazon. *Eur J Clin Nutr*. 1994; 48(5): 326-32.
- Da Silva-Nunes M, Ferreira MU. Clinical spectrum of uncomplicated malaria in semi-immune Amazonians: beyond the symptomatic vs asymptomatic dichotomy. *Mem Inst Oswaldo Cruz*. 2007; 102(3): 341-7.
- Dev V, Phookan S, Sharma VP, Anand SP. Physiographic and entomologic risk factors of malaria in Assam, India. *Am J Trop Med Hyg*. 2004; 71(4): 451-6.
- Doodoo D, Atuguba F, Bosomprah S, Ansa NA, Ansa P, Lamptey H, Egyir B, Oduro AR, Gyan B, Hodgson A, Koram KA. Antibody levels to multiple malaria vaccine candidate antigens in relation to clinical malaria episodes in children in the Kasena-Nankana district of Northern Ghana. *Malar J*. 2011; 10: 108.
- Duarte EC, Gyorkos TW, Pang L, Abrahamowicz M. Epidemiology of malaria in a hypoendemic Brazilian Amazon migrant population: a cohort study. *Am J Trop Med Hyg*. 2004; 70(3): 229-37.
- Erhart A, Thang ND, Bien TH, Tung NM, Hung NQ, Hung LX, Tuy TQ, Speybroeck N, Cong LD, Coosemans M, D'Alessandro U. Malaria epidemiology in a rural area of the Mekong Delta: a prospective community-based study. *Trop Med Int Health*. 2004; 9(10): 1081-90.
- Erhart A, Thang ND, Hung NQ, Toi LV, Hung LX, Tuy TQ, Cong LD, Speybroeck N, Coosemans M, D'Alessandro U. Forest malaria in Vietnam: a challenge for control. *Am J Trop Med Hyg*. 2004; 70(2): 110-8.
- Erhart A, Thang ND, Xa NX, Thieu NQ, Hung LX, Hung NQ, Nam NV, Toi LV, Tung NM, Bien TH, Tuy TQ, Cong LD, Thuan LK, Coosemans M, D'Alessandro U. Accuracy of the health information system on malaria surveillance in Vietnam. *Trans R Soc Trop Med Hyg*. 2007; 101(3): 216-25.
- Ernst KC, Adoka SO, Kowuor DO, Wilson ML, John CC. Malaria hotspot areas in a highland Kenya site are consistent in epidemic and non-epidemic years and are associated with ecological factors. *Malar J*. 2006; 78.
- Ghosh SK, Tiwari SN, Sathyanarayan TS, Sampath TRR, Sharma VP, Nanda N, Joshi H, Adak T, Subbarao SK. Larvivorous fish in wells target the malaria vector sibling species of the *Anopheles culicifacies* complex in villages in Karnataka, India. *Trans R Soc Trop Med Hyg*. 2005; 99(2): 101-5.
- Grobusch MP, Lell B, Schwarz NG, Gabor J, Dornemann J, Potschke M, Oyakhrome S, Kiessling GC, Necek M, Langin MU, Klein Klouwenberg P, Klopfer A, Naumann B, Altun H, Agnandji ST, Goesch J, Decker M, Salazar CLO, Supan C, Kombila DU, Borchert L, Koster KB, Pongratz P, Adegnika AA, Glasenapp I von, Issifou S, Kreamsner PG. Intermittent preventive treatment against malaria in infants in Gabon--a randomized, double-blind, placebo-controlled trial. *J Infect Dis*. 2007; 196(11): 1595-602.
- Guinovart C, Dobaño C, Bassat Q, Nhabomba A, Quintó L, Manaca MN, Aguilar R, Rodríguez MH, Barbosa A, Aponte JJ, Mayor AG, Renom M, Moraleda C, Roberts DJ, Schwarzer E, Le Souëf PN, Schofield L, Chitmis CE, Doolan DL, Alonso PL. The role of age and exposure to *Plasmodium falciparum* in the rate of acquisition of naturally acquired immunity: a randomized controlled trial. *PLoS One*. 2012; 7(3): e32362. .
- Gupta V, Perez-Perez GI, Dorsey G, Rosenthal PJ, Blaser MJ. The seroprevalence of *Helicobacter pylori* and its relationship to malaria in Ugandan children. *Trans R Soc Trop Med Hyg*. 2012; 106(1): 35-42. .
- Guthmann JP, Llanos-Cuentas A, Palacios A, Hall AJ. Environmental factors as determinants of malaria risk. A descriptive study on the northern coast of Peru. *Trop Med Int Health*. 2002; 7(6): 518-25.
- Hamusse SD, Balcha TT, Belachew T. The impact of indoor residual spraying on malaria incidence in East Shoa Zone, Ethiopia. *Glob Health Action*. 2012; 11619. .
- Haque U, Glass GE, Bombliès A, Hashizume M, Mitra D, Noman N, Haque W, Kabir MM, Yamamoto T, Overgaard HJ. Risk factors associated with clinical malaria episodes in Bangladesh: a longitudinal study. *Am J Trop Med Hyg*. 2013; 88(4): 727-32. .
- Ijumba JN, Shenton FC, Clarke SE, Mosha FW, Lindsay SW. Irrigated crop production is associated with less malaria than traditional agricultural practices in Tanzania. *Trans R Soc Trop Med Hyg*. 2002; 96(5): 476-80.

Jambulingam P, Mohapatra SS, Govardhini P, Das LK, Manoharan A, Pani SP, Das PK. Microlevel epidemiological variations in malaria & its implications on control strategy. *Indian J Med Res.* 1991; 371-8.

Jonker FAM, Calis JCM, van Hensbroek MB, Phiri K, Geskus RB, Brabin BJ, Leenstra T. Iron status predicts malaria risk in Malawian preschool children. *PLoS One.* 2012; 7(8): e42670. .

Kajeguka D, Mwanziva C, Daou M, Ndaró A, Matondo S, Mbugi E, Dolmans W, Chilongola J. CD36 c.1264 T>G null mutation impairs acquisition of IgG antibodies to Plasmodium falciparum MSP119 antigen and is associated with higher malaria incidences in Tanzanian children. *Scand J Immunol.* 2012; 75(3): 355-60. .

Kamolratanakul P, Butraporn P, Prasittisuk M, Prasittisuk C, Indaratna K. Cost-effectiveness and sustainability of lambda-cyhalothrin-treated mosquito nets in comparison to DDT spraying for malaria control in western Thailand. *Am J Trop Med Hyg.* 2001; 65(4): 279-84.

Kamolratanakul P, Dhanamun B, Lertmaharit S, Seublinwong T, Udomsangpetch R, Chirakalwasorn N, Thaithong S. Malaria in a rural area of eastern Thailand: baseline epidemiological studies at Bo Thong. *Southeast Asian J Trop Med Public Health.* 1992; 23(4): 783-7.

Khosa E, Kuonza LR, Kruger P, Maimela E. Towards the elimination of malaria in South Africa: a review of surveillance data in Mutale Municipality, Limpopo Province, 2005 to 2010. *Malar J.* 2013; 7. .

Kinde-Gazard D, Baglo T. Assessment of microbial larvicide spraying with *Bacillus thuringiensis israelensis*, for the prevention of malaria. *Med Mal Infect.* 2012; 42(3): 114-8. .

Kobbe R, Kreuzberg C, Adjei S, Thompson B, Langefeld I, Thompson PA, Abruquah HH, Kreuels B, Ayim M, Busch W, Marks F, Amoah K, Opoku E, Meyer CG, Adjei O, May J. A randomized controlled trial of extended intermittent preventive antimalarial treatment in infants. *Clin Infect Dis.* 2007; 45(1): 16-25.

Konaté AT, Yaro JB, Ouédraogo AZ, Diarra A, Gansané A, Soulama I, Kangoyé DT, Kaboré Y, Ouédraogo E, Ouédraogo A, Tiono AB, Ouédraogo IN, Chandramohan D, Cousens S, Milligan PJ, Sirima SB, Greenwood BM, Diallo DA. Morbidity from malaria in children in the year after they had received

Krefis AC, Schwarz NG, Krüger A, Fobil J, Nkrumah B, Acquah S, Loag W, Sarpong N, Adu-Sarkodie Y, Ranft U, May J. Modeling the relationship between precipitation and malaria incidence in children from a holoendemic area in Ghana. *Am J Trop Med Hyg.* 2011; 84(2): 285-91. .

Lemnge MM, Msangeni HA, Rønne AM, Salum FM, Jakobsen PH, Mhina JJ, Akida JA, Bygbjerg IC. Maloprim malaria prophylaxis in children living in a holoendemic village in north-eastern Tanzania. *Trans R Soc Trop Med Hyg.* 1997; 91(1): 68-73.

Loha E, Lindtjörn B. Predictors of Plasmodium falciparum malaria incidence in Chano Mille, South Ethiopia: a longitudinal study. *Am J Trop Med Hyg.* 2012; 87(3): 450-9. .

Magris M, Rubio-Palis Y, Alexander N, Ruiz B, Galván N, Frias D, Blanco M, Lines J. Community-randomized trial of lambda-cyhalothrin-treated hammock nets for malaria control in Yanomami communities in the Amazon region of Venezuela. *Trop Med Int Health.* 2007; 12(3): 392-403.

Manimunda SP, Sugunan AP, Sha WA, Singh SS, Shriram AN, Vijayachari P. Tsunami, post-tsunami malaria situation in Nancowry group of islands, Nicobar district, Andaman and Nicobar Islands. *Indian J Med Res.* 2011; 76-82. .

McGuinness D, Koram K, Bennett S, Wagner G, Nkrumah F, Riley E. Clinical case definitions for malaria: clinical malaria associated with very low parasite densities in African infants. *Trans R Soc Trop Med Hyg.* 1998; 92(5): 527-31.

Menendez C, Kahigwa E, Hirt R, Vounatsou P, Aponte JJ, Font F, Acosta CJ, Schellenberg DM, Galindo CM, Kimario J, Urassa H, Brabin B, Smith TA, Kitua AY, Tanner M, Alonso PL. Randomised placebo-controlled trial of iron supplementation and malaria chemoprophylaxis for prevention of severe anaemia and malaria in Tanzanian infants. *Lancet.* 1997; 350(9081): 844-50.

Mitjà O, Paru R, Selve B, Betuela I, Siba P, De Lazzari E, Bassat Q. Malaria epidemiology in Lihir Island, Papua New Guinea. *Malar J.* 2013; 98. .

Mnzava AE, Sharp BL, Mthembu DJ, le Sueur D, Dlamini SS, Gumede JK, Kleinschmidt I. Malaria control--two years' use of insecticide-treated bednets compared with insecticide house spraying in KwaZulu-Natal. *S Afr Med J.* 2001; 91(11): 978-83.

Mockenhaupt FP, Reither K, Zanger P, Roepcke F, Danquah I, Saad E, Ziniel P, Dzisi SY, Frempong M, Agana-Nsiire P, Amoo-Sakyi F, Otchwemah R, Cramer JP, Anemana SD, Dietz E, Bienzle U. Intermittent preventive treatment in infants as a means of malaria control: a randomized, double-blind, placebo-controlled trial in northern Ghana. *Antimicrob Agents Chemother.* 2007; 51(9): 3273-81.

Molez JF, Diop A, Gaye O, Lemasson JJ, Fontenille D. [Malaria morbidity in Barkedji, village of Ferlo, in Senegal Sahelian area]. *Bull Soc Pathol Exot.* 2006; 99(3): 187-90.

Mtove G, Amos B, Nadjim B, Hendriksen ICE, Dondorp AM, Mwambuli A, Kim DR, Ochiai RL, Clemens JD, von Seidlein L, Reyburn H, Deen J. Decreasing incidence of severe malaria and community-acquired bacteraemia among hospitalized children in Muheza, north-eastern Tanzania, 2006-2010. *Malar J.* 2011; 10: 320. .

Mwangi TW, Mohammed M, Dayo H, Snow RW, Marsh K. Clinical algorithms for malaria diagnosis lack utility among people of different age groups. *Trop Med Int Health.* 2005; 10(6): 530-6.

Ndibazza J, Mpairwe H, Webb EL, Mawa PA, Nampijja M, Muhangi L, Kihembo M, Lule SA, Rutebarika D, Apule B, Akello F, Akurut H, Oduru G, Naniima P, Kizito D, Kizza M, Kizindo R, Tweyongere R, Alcock KJ, Muwanga M, Elliott AM. Impact of anthelmintic treatment in pregnancy and

Ngomane L, de Jager C. Changes in malaria morbidity and mortality in Mpumalanga Province, South Africa (2001-2009): a retrospective study. *Malar J.* 2012; 19. .

Noya O, Gabaldón Berti Y, Alarcón de Noya B, Borges R, Zerpa N, Urbáez JD, Madonna A, Garrido E, Jimenez MA, Borges RE. A population-based clinical trial with the SPf66 synthetic Plasmodium falciparum malaria vaccine in Venezuela. *J Infect Dis.* 1994; 170(2): 396-402.

Ouédraogo A, Tiono AB, Diarra A, Sanon S, Yaro JB, Ouedraogo E, Bougouma EC, Soulama I, Gansané A, Ouedraogo A, Konate AT, Nebie I, Watson NL, Sanza M, Dube TJT, Sirima SB. Malaria morbidity in high and seasonal malaria transmission area of Burkina Faso. *PLoS One.* 2013; 8(1): e50036. .

- Özbilgina A, Topluoglu S, Es S, Islek E, Mollahaliloglu S, Erkok Y. Malaria in Turkey: successful control and strategies for achieving elimination. *Acta Trop.* 2011; 120(1-2): 15-23.
- Parise EV, de Araújo GC, Pinheiro RT. [Spatial analysis and determination of priority areas for malaria control in the State of Tocantins, from 2003 to 2008]. *Rev Soc bras Med trop.* 2011; 44(1): 63-9. .
- Prakash A, Bhattacharyya DR, Mohapatra PK, Mahanta J. Role of the prevalent Anopheles species in the transmission of Plasmodium falciparum and P. vivax in Assam state, north-eastern India. *Ann Trop Med Parasitol.* 2004; 98(6): 559-68.
- Reid HL, Haque U, Roy S, Islam N, Clements ACA. Characterizing the spatial and temporal variation of malaria incidence in Bangladesh, 2007. *Malar J.* 2012; 170. .
- Richards FO Jr, Klein RE, Flores RZ, Weller S, Gatica M, Zeissig R, Sexton J. Permethrin-impregnated bed nets for malaria control in northern Guatemala: epidemiologic impact and community acceptance. *Am J Trop Med Hyg.* 1993; 49(4): 410-8.
- Rolfes MA, McCarra M, Magak NG, Ernst KC, Dent AE, Lindblade KA, John CC. Development of clinical immunity to malaria in highland areas of low and unstable transmission. *Am J Trop Med Hyg.* 2012; 87(5): 806-12. .
- Roper MH, Torres RS, Goicochea CG, Andersen EM, Guarda JS, Calampa C, Hightower AW, Magill AJ. The epidemiology of malaria in an epidemic area of the Peruvian Amazon. *Am J Trop Med Hyg.* 2000; 62(2): 247-56.
- Rutta ASM, Francis F, Mmbando BP, Ishengoma DS, Sembuche SH, Malecela EK, Sadi JY, Kamugisha ML, Lemnge MM. Using community-owned resource persons to provide early diagnosis and treatment and estimate malaria burden at community level in north-eastern Tanzania. *Malar J.* 2012; 152. .
- Sahu SS, Jambulingam P, Vijayakumar T, Subramanian S, Kalyanasundaram M. Impact of alphacypermethrin treated bed nets on malaria in villages of Malkangiri district, Orissa, India. *Acta Trop.* 2003; 89(1): 55-66.
- Sahu SS, Vijayakumar T, Kalyanasundaram M, Subramanian S, Jambulingam P. Impact of lambda-cyhalothrin capsule suspension treated bed nets on malaria in tribal villages of Malkangiri district, Orissa, India. *Indian J Med Res.* 2008; 128(3): 262-70.
- Schellenberg D, Menendez C, Kahigwa E, Aponte J, Vidal J, Tanner M, Mshinda H, Alonso P. Intermittent treatment for malaria and anaemia control at time of routine vaccinations in Tanzanian infants: a randomised, placebo-controlled trial. *Lancet.* 2001; 357(9267): 1471-7.
- Schellenberg DM, Aponte JJ, Kahigwa EA, Mshinda H, Tanner M, Menendez C, Alonso PL. The incidence of clinical malaria detected by active case detection in children in Ifakara, southern Tanzania. *Trans R Soc Trop Med Hyg.* 2003; 97(6): 647-54.
- Senn N, Rarau P, Stanicic DI, Robinson L, Barnadas C, Manong D, Salib M, Iga J, Tarongka N, Ley S, Rosanas-Urgell A, Aponte JJ, Zimmerman PA, Beeson JG, Schofield L, Siba P, Rogerson SJ, Reeder JC, Mueller I. Intermittent preventive treatment for malaria in Papua New Guinean infants exposed to Plasmodium falciparum and P. vivax: a randomized controlled trial. *PLoS Med.* 2012; 9(3): e1001195. .
- Sesay S, Milligan P, Touray E, Sowe M, Webb EL, Greenwood BM, Bojang KA. A trial of intermittent preventive treatment and home-based management of malaria in a rural area of The Gambia. *Malar J.* 2011; 10.
- Sharma SK, Chattopadhyay R, Chakrabarti K, Pati SS, Srivastava VK, Tyagi PK, Mahanty S, Misra SK, Adak T, Das BS, Chitnis CE. Epidemiology of malaria transmission and development of natural immunity in a malaria-endemic village, San Dulakudar, in Orissa state, India. *Am J Trop Med Hyg.* 2004; 71(4): 457-65.
- Sharma SK, Tyagi PK, Padhan K, Adak T, Subbarao SK. Malarial morbidity in tribal communities living in the forest and plain ecotypes of Orissa, India. *Ann Trop Med Parasitol.* 2004; 98(5): 459-68.
- Sharma SK, Tyagi PK, Padhan K, Upadhyay AK, Haque MA, Nanda N, Joshi H, Biswas S, Adak T, Das BS, Chauhan VS, Chitnis CE, Subbarao SK. Epidemiology of malaria transmission in forest and plain ecotype villages in Sundargarh District, Orissa, India. *Trans R Soc Trop Med Hyg.* 2006; 100(10): 917-25.
- Sharma SK, Tyagi PK, Upadhyay AK, Haque MA, Adak T, Dash AP. Building small dams can decrease malaria: a comparative study from Sundargarh District, Orissa, India. *Acta Trop.* 2008; 107(2): 174-8.
- Sharma SK, Upadhyay AK, Haque MA, Padhan K, Tyagi PK, Batra CP, Adak T, Dash AP, Subbarao SK. Effectiveness of mosquito nets treated with a tablet formulation of deltamethrin for malaria control in a hyperendemic tribal area of Sundargarh District, Orissa, India. *J Am Mosq Control Assoc.* 2006; 22(1): 111-8.
- Singh N, Mishra SS, Singh MP, Sharma VP. Seasonality of Plasmodium vivax and P. falciparum in tribal villages in central India (1987-1995). *Ann Trop Med Parasitol.* 2000; 94(2): 101-12.
- Singh N, Shukla MM, Chand G, Bharti PK, Singh MP, Shukla MK, Mehra RK, Sharma RK, Dash AP. Epidemic of Plasmodium falciparum malaria in Central India, an area where chloroquine has been replaced by artemisinin-based combination therapy. *Trans R Soc Trop Med Hyg.* 2011; 105(3): 133-9. .
- Soe-Soe, Khin-Saw-Aye, Htay-Aung, Nay-Win, Tin-Aung, Than-Swe, Roussillon C, Pérignon JL, Druilhe P. Premunition against Plasmodium falciparum in a malaria hyperendemic village in Myanmar. *Trans R Soc Trop Med Hyg.* 2001; 95(1): 81-4.
- Subramanian S, Manoharan A, Sahu S, Jambulingam P, Govardhini P, Mohapatra SS, Das PK. Living conditions and occurrence of malaria in a rural community. *Indian J Malariol.* 1991; 28(1): 29-37.
- Thiam S, Thwing J, Diallo I, Fall FB, Diouf MB, Perry R, Ndiop M, Diouf ML, Cisse MM, Diaw MM, Thior M. Scale-up of home-based management of malaria based on rapid diagnostic tests and artemisinin-based combination therapy in a resource-poor country: results in Senegal. *Malar J.* 2012; 334. .
- Thompson R, Begtrup K, Cuamba N, Dgedge M, Mendis C, Gamage-Mendis A, Enosse SM, Barreto J, Sinden RE, Hogg B. The Matola malaria project: a temporal and spatial study of malaria transmission and disease in a suburban area of Maputo, Mozambique. *Am J Trop Med Hyg.* 1997; 57(5): 550-9.

Thriemer K, Ley B, Ame S, von Seidlein L, Pak GD, Chang NY, Hashim R, Schmieid WH, Busch CJ-L, Nixon S, Morrissey A, Puri MK, Ali M, Ochiai RL, Wierzba T, Jiddawi MS, Clemens JD, Ali SM, Deen JL. The burden of invasive bacterial infections in Pemba, Zanzibar. *PLoS One*. 2012; 7(2): e30350. .

Trape J-F, Tall A, Diagne N, Ndiath O, Ly AB, Faye J, Dieye-Ba F, Roucher C, Bouganali C, Badiane A, Sarr FD, Mazenot C, Touré-Baldé A, Raoult D, Druilhe P, Mercereau-Puijalon O, Rogier C, Sokhna C. Malaria morbidity and pyrethroid resistance after the introduction of insecticide-treated bednets and artemisinin-based combination therapies: a longitudinal study. *Lancet Infect Dis*. 2011; 11(12): 925-32. .

Van den Berg H, Velayudhan R, Ebol A, Catbagan BHG Jr, Turingan R, Tusso M, Hii J. Operational efficiency and sustainability of vector control of malaria and dengue: descriptive case studies from the Philippines. *Malar J*. 2012; 269. .

Van der Hoek W, Konradsen F, Dijkstra DS, Amerasinghe PH, Amerasinghe FP. Risk factors for malaria: a microepidemiological study in a village in Sri Lanka. *Trans R Soc Trop Med Hyg*. 1998; 92(3): 265-9.

Veenemans J, Milligan P, Prentice AM, Schouten LRA, Inja N, van der Heijden AC, de Boer LCC, Jansen EJS, Koopmans AE, Enthoven WTM, Kraaijenhagen RJ, Demir AY, Uges DRA, Mbugi EV, Savelkoul HFJ, Verhoef H. Effect of supplementation with zinc and other micronutrients on malaria in Tanzanian children: a randomised trial. *PLoS Med*. 2011; 8(11): e1001125. .

Webb EL, Mawa PA, Ndibazza J, Kizito D, Namatovu A, Kyosiimire-Lugemwa J, Nanteza B, Nampijja M, Muhangi L, Woodburn PW, Akurut H, Mpairwe H, Akello M, Lyadda N, Bukusuba J, Kihembo M, Kizza M, Kizindo R, Nabulime J, Ameke C, Namujju PB, Twayongyere R, Muwanga M, Whitworth JAG, Elliott AM. Effect of single-dose anthelmintic treatment during pregnancy on an infant's response to immunisation and on susceptibility to infectious diseases in infancy: a randomised, double-blind, placebo-controlled trial. *Lancet*. 2011; 377(9759): 52-62. .

Wu N, Qin L, Liao G, Zhou W, Geng W, Shi Y, Tan Y, Zhao K. Field evaluation of bednets impregnated with deltamethrin for malaria control. *Southeast Asian J Trop Med Public Health*. 1993; 24(4): 664-71.

Yadav RS, Sampath TR, Sharma VP, Adak T, Ghosh SK. Evaluation of lambda-cyhalothrin-impregnated bednets in a malaria endemic area of India. Part 3. Effects on malaria incidence and clinical measures. *J Am Mosq Control Assoc*. 1998; 14(4): 444-50.

Yadav RS, Sharma VP, Ghosh SK, Kumar A. Quartan malaria--an investigation on the incidence of *Plasmodium malariae* in Bisra PHC, District Sundargarh, Orissa. *Indian J Malariol*. 1990; 27(2): 85-94.

Yamazaki A, Yasunami M, Ofori M, Horie H, Kikuchi M, Helegbe G, Takaki A, Ishii K, Omar AH, Akanmori BD, Hirayama K. Human leukocyte antigen class I polymorphisms influence the mild clinical manifestation of *Plasmodium falciparum* infection in Ghanaian children. *Hum Immunol*. 2011; 72(10): 881-8. .

Yé Y, Kyobutungi C, Louis VR, Sauerborn R. Micro-epidemiology of *Plasmodium falciparum* malaria: Is there any difference in transmission risk between neighbouring villages?. *Malar J*. 2007; 46.

Zaim M, Ghavami MB, Nazari M, Edrissian GH, Nateghpour M. Cyfluthrin (EW 050)-impregnated bednets in a malaria control program in Ghassreghand (Baluchistan, Iran). *J Am Mosq Control Assoc*. 1998; 14(4): 421-30.



**Appendix Table 12: Malaria mortality data sources used in the GBD 2013.**

| Country                | Source number | Source                                                                                                                                                                                                                                                               | Surveillance | Verbal Autopsy | Vital Registration |
|------------------------|---------------|----------------------------------------------------------------------------------------------------------------------------------------------------------------------------------------------------------------------------------------------------------------------|--------------|----------------|--------------------|
| Afghanistan            | 01 - AFG      | Centers for Disease Control and Prevention (CDC), United Nations Children's Fund (UNICEF). Afghanistan - Badghis Nutrition and Health Survey 2002.                                                                                                                   |              | X              |                    |
| Albania                | 01 - ALB      | World Health Organization (WHO). WHO Mortality Database Version February 2014. Geneva, Switzerland: World Health Organization (WHO), 2014.                                                                                                                           |              |                | X                  |
| Antigua and Barbuda    | 01 - ATG      | World Health Organization (WHO). WHO Mortality Database Version February 2014. Geneva, Switzerland: World Health Organization (WHO), 2014.                                                                                                                           |              |                | X                  |
| Argentina              | 01 - ARG      | World Health Organization (WHO). WHO Mortality Database Version February 2014. Geneva, Switzerland: World Health Organization (WHO), 2014.                                                                                                                           |              |                | X                  |
| Armenia                | 01 - ARM      | World Health Organization (WHO). WHO Mortality Database Version February 2014. Geneva, Switzerland: World Health Organization (WHO), 2014.                                                                                                                           |              |                | X                  |
| Australia              | 01 - AUS      | World Health Organization (WHO). WHO Mortality Database Version February 2014. Geneva, Switzerland: World Health Organization (WHO), 2014.                                                                                                                           |              |                | X                  |
| Austria                | 01 - AUT      | World Health Organization (WHO). WHO Mortality Database Version February 2014. Geneva, Switzerland: World Health Organization (WHO), 2014.                                                                                                                           |              |                | X                  |
| Azerbaijan             | 01 - AZE      | World Health Organization (WHO). WHO Mortality Database Version February 2014. Geneva, Switzerland: World Health Organization (WHO), 2014.                                                                                                                           |              |                | X                  |
| Bahrain                | 01 - BHR      | World Health Organization (WHO). WHO Mortality Database Version February 2014. Geneva, Switzerland: World Health Organization (WHO), 2014.                                                                                                                           |              |                | X                  |
| Bangladesh             | 01 - BGD      | INDEPTH, International Centre for Diarrhoeal Disease Research (Bangladesh). Bangladesh - Matlab Health and Demographic Surveillance System. Dhaka, Bangladesh: International Centre for Diarrhoeal Disease Research (Bangladesh).                                    |              | X              |                    |
| Bangladesh             | 02 - BGD      | INDEPTH. Bangladesh - AMK Health and Demographic Surveillance System.                                                                                                                                                                                                |              | X              |                    |
| Barbados               | 01 - BRB      | World Health Organization (WHO). WHO Mortality Database Version February 2014. Geneva, Switzerland: World Health Organization (WHO), 2014.                                                                                                                           |              |                | X                  |
| Belarus                | 01 - BLR      | World Health Organization (WHO). WHO Mortality Database Version February 2014. Geneva, Switzerland: World Health Organization (WHO), 2014.                                                                                                                           |              |                | X                  |
| Belgium                | 01 - BEL      | World Health Organization (WHO). WHO Mortality Database Version February 2014. Geneva, Switzerland: World Health Organization (WHO), 2014.                                                                                                                           |              |                | X                  |
| Belize                 | 01 - BLZ      | World Health Organization (WHO). WHO Mortality Database Version February 2014. Geneva, Switzerland: World Health Organization (WHO), 2014.                                                                                                                           |              |                | X                  |
| Bermuda                | 01 - BMU      | World Health Organization (WHO). WHO Mortality Database Version February 2014. Geneva, Switzerland: World Health Organization (WHO), 2014.                                                                                                                           |              |                | X                  |
| Bolivia                | 01 - BOL      | World Health Organization (WHO). WHO Mortality Database Version February 2014. Geneva, Switzerland: World Health Organization (WHO), 2014.                                                                                                                           |              |                | X                  |
| Bosnia and Herzegovina | 01 - BIH      | World Health Organization (WHO). WHO Mortality Database Version February 2014. Geneva, Switzerland: World Health Organization (WHO), 2014.                                                                                                                           |              |                | X                  |
| Brazil                 | 01 - BRA      | World Health Organization (WHO). WHO Mortality Database Version February 2014. Geneva, Switzerland: World Health Organization (WHO), 2014.                                                                                                                           |              |                | X                  |
| Brunei                 | 01 - BRN      | World Health Organization (WHO). WHO Mortality Database Version February 2014. Geneva, Switzerland: World Health Organization (WHO), 2014.                                                                                                                           |              |                | X                  |
| Bulgaria               | 01 - BGR      | World Health Organization (WHO). WHO Mortality Database Version February 2014. Geneva, Switzerland: World Health Organization (WHO), 2014.                                                                                                                           |              |                | X                  |
| Burkina Faso           | 01 - BFA      | Abdullah S, Adazu K, Masanja H, Diallo D, Hodgson A, Ilboudo-Sanogo E, Nhacolo A, Owusu-Agyei S, Thompson R, Smith T, Binka FN. Patterns of age-specific mortality in children in endemic areas of sub-Saharan Africa. Am J Trop Med Hyg. 2007; 77(6 Suppl): 99-105. |              | X              |                    |

|              |          |                                                                                                                                                                                                                                                                                                              |   |   |
|--------------|----------|--------------------------------------------------------------------------------------------------------------------------------------------------------------------------------------------------------------------------------------------------------------------------------------------------------------|---|---|
| Burkina Faso | 02 - BFA | Bell JS, Ouédraogo M, Ganaba R, Sombié I, Byass P, Baggaley RF, Filippi V, Fitzmaurice AE, Graham WJ. The epidemiology of pregnancy outcomes in rural Burkina Faso. <i>Trop Med Int Health</i> . 2008; 13 Suppl 1: 31-43.                                                                                    | X |   |
| Burkina Faso | 03 - BFA | Diallo AH, Meda N, Sommerfelt H, Traore GS, Cousens S, Tylleskar T. The high burden of infant deaths in rural Burkina Faso: a prospective community-based cohort study. <i>BMC Public Health</i> . 2012; 12(739).                                                                                            | X |   |
| Burkina Faso | 04 - BFA | INDEPTH, Nouna Health Research Center (Burkina Faso). Burkina Faso - Nouna Health and Demographic Surveillance System.                                                                                                                                                                                       | X |   |
| Burkina Faso | 05 - BFA | Office of Scientific and Technical Research Overseas (France). Burkina Faso - Niangoloko Childhood Mortality 1986-1988. 1989.                                                                                                                                                                                | X |   |
| Burkina Faso | 06 - BFA | Office of Scientific and Technical Research Overseas (France). Burkina Faso - Pissila Analysis of Mortality in Childhood after Three Years of Observation 1985-1987. Office of Scientific and Technical Research Overseas (France), 1988.                                                                    | X |   |
| Burkina Faso | 07 - BFA | Ramroth H, Lorenz E, Rankin JC, Fottrell E, Yé M, Neuhann F, Ssenono M, Sié A, Byass P, Becher H. Causas de la distribución de muerte con el modelo InterVA y la codificación de médicos en un área rural de Burkina Faso. <i>Trop Med Int Health</i> . 2012; 17(7): 904-13.                                 | X |   |
| Burkina Faso | 08 - BFA | Rowe AK, Rowe SY, Snow RW, Korenromp EL, Schellenberg JR, Stein C, Nahlen BL, Bryce J, Black RE, Steketee RW. The burden of malaria mortality among African children in the year 2000. <i>Int J Epidemiol</i> . 2006; 35(3): 691-704.                                                                        | X |   |
| Burkina Faso | 09 - BFA | Würthwein R, Gbangou A, Sauerborn R, Schmidt CM. Measuring the local burden of disease. A study of years of life lost in sub-Saharan Africa. <i>Int J Epidemiol</i> . 2001; 30(3): 501-8.                                                                                                                    | X |   |
| Burkina Faso | 10 - BFA | Yé M, Diboulo E, Niamba L, Sié A, Coulibaly B, Bagagnan C, Dembélé J, Ramroth H. An improved method for physician-certified verbal autopsy reduces the rate of discrepancy: experiences in the Nouna Health and Demographic Surveillance Site (NHDSS), Burkina Faso. <i>Popul Health Metr</i> . 2011; 9: 34. | X |   |
| Burundi      | 01 - BDI | Delacollette C, Barutwanayo M. Mortality and morbidity at young ages in a stable hyperendemic malaria region, community Nyanza-Lac, Imbo South, Burundi. <i>Bull Soc Pathol Exot</i> . 1993; 86(5): 373-9.                                                                                                   | X |   |
| Cambodia     | 01 - KHM | Oum S, Chandramohan D, Cairncross S. Community-based surveillance: a pilot study from rural Cambodia. <i>Trop Med Int Health</i> . 2005; 10(7): 689-97.                                                                                                                                                      | X |   |
| Canada       | 01 - CAN | World Health Organization (WHO). WHO Mortality Database Version February 2014. Geneva, Switzerland: World Health Organization (WHO), 2014.                                                                                                                                                                   |   | X |
| Cape Verde   | 01 - CPV | World Health Organization (WHO). WHO Mortality Database Version February 2014. Geneva, Switzerland: World Health Organization (WHO), 2014.                                                                                                                                                                   |   | X |
| Chile        | 01 - CHL | Ministry of Health (Chile), National Institute of Statistics (Chile). Chile Vital Registration - Deaths 1985.                                                                                                                                                                                                |   | X |
| Chile        | 02 - CHL | World Health Organization (WHO). WHO Mortality Database Version February 2014. Geneva, Switzerland: World Health Organization (WHO), 2014.                                                                                                                                                                   |   | X |
| China        | 01 - CHN | Chinese Center for Disease Control and Prevention (CCDC). China Disease Surveillance Points 1991 - China CDC.                                                                                                                                                                                                |   | X |
| China        | 02 - CHN | Chinese Center for Disease Control and Prevention (CCDC). China Disease Surveillance Points 1994 - China CDC.                                                                                                                                                                                                |   | X |
| China        | 03 - CHN | Chinese Center for Disease Control and Prevention (CCDC). China Disease Surveillance Points 2000 - China CDC.                                                                                                                                                                                                |   | X |
| China        | 04 - CHN | Chinese Center for Disease Control and Prevention (CCDC). China Disease Surveillance Points 2002 - China CDC.                                                                                                                                                                                                |   | X |
| China        | 05 - CHN | Chinese Center for Disease Control and Prevention (CCDC). China Disease Surveillance Points 2004 - China CDC.                                                                                                                                                                                                |   | X |
| China        | 06 - CHN | Chinese Center for Disease Control and Prevention (CCDC). China Disease Surveillance Points 2005 - China CDC.                                                                                                                                                                                                |   | X |
| China        | 07 - CHN | Chinese Center for Disease Control and Prevention (CCDC). China Disease Surveillance Points 2006 - China CDC.                                                                                                                                                                                                |   | X |
| China        | 08 - CHN | Chinese Center for Disease Control and Prevention (CCDC). China Disease Surveillance Points 2007 - China CDC.                                                                                                                                                                                                |   | X |
| China        | 09 - CHN | Chinese Center for Disease Control and Prevention (CCDC). China Disease Surveillance Points 2008 - China CDC.                                                                                                                                                                                                |   | X |
| China        | 10 - CHN | Chinese Center for Disease Control and Prevention (CCDC). China Disease Surveillance Points 2009 - China CDC.                                                                                                                                                                                                |   | X |
| China        | 11 - CHN | Chinese Center for Disease Control and Prevention (CCDC). China Disease Surveillance Points 2010 - China CDC.                                                                                                                                                                                                |   | X |

|                                  |          |                                                                                                                                                                                                                                         |  |   |   |
|----------------------------------|----------|-----------------------------------------------------------------------------------------------------------------------------------------------------------------------------------------------------------------------------------------|--|---|---|
| China                            | 12 - CHN | Chinese Center for Disease Control and Prevention (CCDC). China Disease Surveillance Points 2011 - China CDC.                                                                                                                           |  |   | X |
| China                            | 13 - CHN | World Health Organization (WHO). WHO Mortality Database Version February 2014. Geneva, Switzerland: World Health Organization (WHO), 2014.                                                                                              |  |   | X |
| Colombia                         | 01 - COL | National Administrative Department of Statistics (Colombia). Colombia Vital Statistics - Deaths 2008. Bogotá, Colombia: National Administrative Department of Statistics (Colombia).                                                    |  |   | X |
| Colombia                         | 02 - COL | World Health Organization (WHO). WHO Mortality Database Version February 2014. Geneva, Switzerland: World Health Organization (WHO), 2014.                                                                                              |  |   | X |
| Costa Rica                       | 01 - CRI | World Health Organization (WHO). WHO Mortality Database Version February 2014. Geneva, Switzerland: World Health Organization (WHO), 2014.                                                                                              |  |   | X |
| Croatia                          | 01 - HRV | World Health Organization (WHO). WHO Mortality Database Version February 2014. Geneva, Switzerland: World Health Organization (WHO), 2014.                                                                                              |  |   | X |
| Cuba                             | 01 - CUB | World Health Organization (WHO). WHO Mortality Database Version February 2014. Geneva, Switzerland: World Health Organization (WHO), 2014.                                                                                              |  |   | X |
| Cyprus                           | 01 - CYP | World Health Organization (WHO). WHO Mortality Database Version February 2014. Geneva, Switzerland: World Health Organization (WHO), 2014.                                                                                              |  |   | X |
| Czech Republic                   | 01 - CZE | World Health Organization (WHO). WHO Mortality Database Version February 2014. Geneva, Switzerland: World Health Organization (WHO), 2014.                                                                                              |  |   | X |
| Democratic Republic of the Congo | 01 - COD | Coghlan B, Brennan RJ, Ngoy P, Dofara D, Otto B, Clements M, Stewart T. Mortality in the Democratic Republic of Congo: a nationwide survey. <i>Lancet</i> . 2006; 367(9504): 44-51.                                                     |  | X |   |
| Democratic Republic of the Congo | 02 - COD | Delacollette C, Van der Stuyft P, Molima K, Delacollette-Lebrun C, Wery M. Etude de la mortalité globale et de la mortalité liée au paludisme dans le Kivu montagneux, Zaïre. <i>Rev Epidemiol Sante Publique</i> . 1989; 37(2): 161-6. |  | X |   |
| Democratic Republic of the Congo | 03 - COD | Garenne M, Willie D, Maire B, Fontaine O, Eeckels R, Briand A, Van den Broeck J. Incidence and duration of severe wasting in two African populations. <i>Public Health Nutr</i> . 2009; 12(11): 1974-82.                                |  | X |   |
| Democratic Republic of the Congo | 04 - COD | Van Den Broeck J, Eeckels R, Vuylsteke J. Influence of nutritional status on child mortality in rural Zaire. <i>Lancet</i> . 1993; 341(8859): 1491-5.                                                                                   |  | X |   |
| Denmark                          | 01 - DNK | World Health Organization (WHO). WHO Mortality Database Version February 2014. Geneva, Switzerland: World Health Organization (WHO), 2014.                                                                                              |  |   | X |
| Dominica                         | 01 - DMA | World Health Organization (WHO). WHO Mortality Database Version February 2014. Geneva, Switzerland: World Health Organization (WHO), 2014.                                                                                              |  |   | X |
| Dominican Republic               | 01 - DOM | World Health Organization (WHO). WHO Mortality Database Version February 2014. Geneva, Switzerland: World Health Organization (WHO), 2014.                                                                                              |  |   | X |
| Eastern Cape                     | 01 - ZEC | Department of Home Affairs (South Africa), Statistics South Africa. South Africa Mortality and Causes of Death 1997-2005. Pretoria, South Africa: Statistics South Africa.                                                              |  |   | X |
| Ecuador                          | 01 - ECU | World Health Organization (WHO). WHO Mortality Database Version February 2014. Geneva, Switzerland: World Health Organization (WHO), 2014.                                                                                              |  |   | X |
| Egypt                            | 01 - EGY | World Health Organization (WHO). WHO Mortality Database Version February 2014. Geneva, Switzerland: World Health Organization (WHO), 2014.                                                                                              |  |   | X |
| El Salvador                      | 01 - SLV | World Health Organization (WHO). WHO Mortality Database Version February 2014. Geneva, Switzerland: World Health Organization (WHO), 2014.                                                                                              |  |   | X |
| Estonia                          | 01 - EST | World Health Organization (WHO). WHO Mortality Database Version February 2014. Geneva, Switzerland: World Health Organization (WHO), 2014.                                                                                              |  |   | X |
| Ethiopia                         | 01 - ETH | Deribew A, Tessema F, Girma B. Determinants of under-five mortality in Gilgel Gibe Field Research Center, Southwest Ethiopia. <i>Ethiopian Journal of Health Development</i> . 2007; 21(2): 117-24.                                     |  | X |   |
| Ethiopia                         | 02 - ETH | Fantahun M, Fottrell E, Berhane Y, Wall S, Högberg U, Byass P. Assessing a new approach to verbal autopsy interpretation in a rural Ethiopian community: the InterVA model. <i>Bull World Health Organ</i> . 2006; 84(3): 204-10.       |  | X |   |
| Ethiopia                         | 03 - ETH | INDEPETH. Ethiopia - Butajira Health and Demographic Surveillance System.                                                                                                                                                               |  | X |   |

|            |          |                                                                                                                                                                                                                                                                                                                                                     |   |   |
|------------|----------|-----------------------------------------------------------------------------------------------------------------------------------------------------------------------------------------------------------------------------------------------------------------------------------------------------------------------------------------------------|---|---|
| Ethiopia   | 04 - ETH | Weldearegawi B, Ashebir Y, Gebeye E, Gebregziabher T, Yohannes M, Mussa S, Berhe H, Abebe Z. Emerging chronic non-communicable diseases in rural communities of Northern Ethiopia: evidence using population-based verbal autopsy method in Kilite Awlaelo surveillance site. <em>Health Policy Plan</em>. 2013. [Epub ahead of print]              | X |   |
| Ethiopia   | 05 - ETH | World Health Organization (WHO). Deployment of artemetherlumefantrine with rapid diagnostic tests at community level, Raya Valley, Tigray, Ethiopia. Geneva, Switzerland: World Health Organization (WHO), 2009.                                                                                                                                    | X |   |
| Fiji       | 01 - FJI | World Health Organization (WHO). WHO Mortality Database Version February 2014. Geneva, Switzerland: World Health Organization (WHO), 2014.                                                                                                                                                                                                          |   | X |
| Finland    | 01 - FIN | World Health Organization (WHO). WHO Mortality Database Version February 2014. Geneva, Switzerland: World Health Organization (WHO), 2014.                                                                                                                                                                                                          |   | X |
| France     | 01 - FRA | World Health Organization (WHO). WHO Mortality Database Version February 2014. Geneva, Switzerland: World Health Organization (WHO), 2014.                                                                                                                                                                                                          |   | X |
| Free State | 01 - ZFS | Department of Home Affairs (South Africa), Statistics South Africa. South Africa Mortality and Causes of Death 1997-2005. Pretoria, South Africa: Statistics South Africa.                                                                                                                                                                          |   | X |
| Gauteng    | 01 - ZGA | Department of Home Affairs (South Africa), Statistics South Africa. South Africa Mortality and Causes of Death 1997-2005. Pretoria, South Africa: Statistics South Africa.                                                                                                                                                                          |   | X |
| Georgia    | 01 - GEO | World Health Organization (WHO). WHO Mortality Database Version February 2014. Geneva, Switzerland: World Health Organization (WHO), 2014.                                                                                                                                                                                                          |   | X |
| Germany    | 01 - DEU | World Health Organization (WHO). WHO Mortality Database Version February 2014. Geneva, Switzerland: World Health Organization (WHO), 2014.                                                                                                                                                                                                          |   | X |
| Ghana      | 01 - GHA | Bawah AA, Binka FN. How many years of life could be saved if malaria were eliminated from a hyperendemic area of northern Ghana?. Am J Trop Med Hyg. 2007; 77(6 Suppl): 145-52.                                                                                                                                                                     | X |   |
| Ghana      | 02 - GHA | Binka FN, Kubaje A, Adjuik M, Williams LA, Lengeler C, Maude GH, Armah GE, Kajihara B, Adiamah JH, Smith PG. Impact of permethrin impregnated bednets on child mortality in Kassena-Nankana district, Ghana: a randomized controlled trial. Trop Med Int Health. 1996; 1(2): 147-54.                                                                | X |   |
| Ghana      | 03 - GHA | Births and Deaths Registry (Ghana). Ghana - Accra Births and Deaths Registry - Deaths 2000-2007.                                                                                                                                                                                                                                                    |   | X |
| Ghana      | 04 - GHA | Ghana Statistical Service, Ghana Health Service, Macro International, Inc. Ghana Special Demographic and Health Survey 2007-2008. Calverton, United States: Macro International, Inc., 2010.                                                                                                                                                        | X |   |
| Ghana      | 05 - GHA | Ghana VAST Study Team. Vitamin A supplementation in northern Ghana: effects on clinic attendances, hospital admissions, and child mortality. Lancet. 1993; 342(8862): 7-12.                                                                                                                                                                         | X |   |
| Ghana      | 06 - GHA | Hurt L, ten Asbroek A, Amenga-Etego S, Zandoh C, Danso S, Edmond K, Hurt C, Tawiah C, Hill Z, Fenty J, Owusu-Agyei S, Campbell OM, Kirkwood BR. Effect of vitamin A supplementation on cause-specific mortality in women of reproductive age in Ghana: a secondary analysis from the ObaapaVitA trial. Bull World Health Organ. 2013; 91(1): 19-27. | X |   |
| Ghana      | 07 - GHA | INDEPETH. Ghana - Navrongo Health and Demographic Surveillance System.                                                                                                                                                                                                                                                                              | X |   |
| Ghana      | 08 - GHA | Manortney S, Carey A, Ansong D, Harvey R, Good B, Boaheng J, Crookston B, Dickerson T. Verbal autopsy: an analysis of the common causes of childhood death in the Barekese sub-district of Ghana. Journal of Public Health in Africa. 2011; 2(e18): 73-7.                                                                                           | X |   |
| Ghana      | 09 - GHA | Mills S, Williams JE, Wak G, Hodgson A. Maternal mortality decline in the Kassena-Nankana district of northern Ghana. Matern Child Health J. 2008; 12(5): 577-85.                                                                                                                                                                                   | X |   |
| Greece     | 01 - GRC | World Health Organization (WHO). WHO Mortality Database Version February 2014. Geneva, Switzerland: World Health Organization (WHO), 2014.                                                                                                                                                                                                          |   | X |
| Grenada    | 01 - GRD | World Health Organization (WHO). WHO Mortality Database Version February 2014. Geneva, Switzerland: World Health Organization (WHO), 2014.                                                                                                                                                                                                          |   | X |
| Guatemala  | 01 - GTM | World Health Organization (WHO). WHO Mortality Database Version February 2014. Geneva, Switzerland: World Health Organization (WHO), 2014.                                                                                                                                                                                                          |   | X |

|               |          |                                                                                                                                                                                                                                              |  |   |   |
|---------------|----------|----------------------------------------------------------------------------------------------------------------------------------------------------------------------------------------------------------------------------------------------|--|---|---|
| Guinea        | 01 - GIN | Basic Support for Institutionalizing Child Survival (BASICS), Save the Children USA. Guinea - Mandiana Mortality Study 1998-1999. 2002.                                                                                                      |  | X |   |
| Guinea-Bissau | 01 - GNB | Roth A, Gustafson P, Nhaga A, Djana Q, Poulsen A, Garly ML, Jensen H, Sodemann M, Rodrigues A, Aaby P. BCG vaccination scar associated with better childhood survival in Guinea-Bissau. Int J Epidemiol. 2005; 34(3): 540-7.                 |  | X |   |
| Guyana        | 01 - GUY | World Health Organization (WHO). WHO Mortality Database Version February 2014. Geneva, Switzerland: World Health Organization (WHO), 2014.                                                                                                   |  |   | X |
| Haiti         | 01 - HTI | World Health Organization (WHO). WHO Mortality Database Version February 2014. Geneva, Switzerland: World Health Organization (WHO), 2014.                                                                                                   |  |   | X |
| Honduras      | 01 - HND | World Health Organization (WHO). WHO Mortality Database Version February 2014. Geneva, Switzerland: World Health Organization (WHO), 2014.                                                                                                   |  |   | X |
| Hungary       | 01 - HUN | World Health Organization (WHO). WHO Mortality Database Version February 2014. Geneva, Switzerland: World Health Organization (WHO), 2014.                                                                                                   |  |   | X |
| Iceland       | 01 - ISL | World Health Organization (WHO). WHO Mortality Database Version February 2014. Geneva, Switzerland: World Health Organization (WHO), 2014.                                                                                                   |  |   | X |
| India         | 01 - IND | Bassani DG, Kumar R, Awasthi S, Morris SK, Paul VK, Shet A, Ram U, Gaffey MF, Black RE, Jha P. Causes of neonatal and child mortality in India: a nationally representative mortality survey. Lancet. 2010; 376(9755): 1853-60.              |  | X |   |
| India         | 02 - IND | Byrraju Foundation, Centre for Chronic Disease Control (India), Cooperative for Assistance and Relief Everywhere (CARE), School of Population Health, University of Queensland (Australia). India - Andhra Pradesh Rural Health Initiative.  |  | X |   |
| India         | 03 - IND | Dhingra N, Jha P, Sharma VP, Cohen AA, Jotkar RM, Rodriguez PS, Bassani DG, Suraweera W, Laxminarayan R, Peto R. Adult and child malaria mortality in India: a nationally representative mortality survey. Lancet. 2010; 376(9754): 1768-74. |  | X |   |
| India         | 04 - IND | Indian Council of Medical Research (ICMR). India Study on Causes of Death by Verbal Autopsy 2003.                                                                                                                                            |  | X |   |
| India         | 05 - IND | Institute of Health Systems (India). India Cause of Death Dataset Version 1.3 1980-1998. Hyderabad, India: Institute of Health Systems (India), 2002.                                                                                        |  | X |   |
| India         | 06 - IND | International Institute for Population Sciences (IIPS) (India), Macro International, Inc. India Demographic and Health Survey 1998-1999. Calverton, United States: Macro International, Inc.                                                 |  | X |   |
| India         | 07 - IND | International Institute for Population Sciences (IIPS). India Demographic and Health Survey 1992-1993. Bombay, India: International Institute for Population Sciences (IIPS).                                                                |  | X |   |
| India         | 08 - IND | Kumar V, Datta N, Wadhwa SS, Singhi S. Morbidity and mortality in diarrhea in rural Haryana Indian. Indian J Pediatr. 1985; 52(418): 455-61.                                                                                                 |  | X |   |
| India         | 09 - IND | Ministry of Health and Family Welfare (India), Office of the Registrar General and Census Commissioner (India). India Special Survey of Deaths 2004.                                                                                         |  | X |   |
| India         | 10 - IND | Morris SK, Bassani DG, Awasthi S, Kumar R, Shet A, Suraweera W, Jha P. Diarrhea, Pneumonia, and Infectious Disease Mortality in Children Aged 5 to 14 Years in India. PLoS One. 2011; 6(5): e20119.                                          |  | X |   |
| India         | 11 - IND | Office of the Registrar General & Census Commissioner (India). India Vital Statistics 1980. New Delhi, India: Office of the Registrar General & Census Commissioner (India).                                                                 |  |   | X |
| India         | 12 - IND | Office of the Registrar General & Census Commissioner (India). India Vital Statistics 1981. New Delhi, India: Office of the Registrar General & Census Commissioner (India).                                                                 |  |   | X |
| India         | 13 - IND | Office of the Registrar General & Census Commissioner (India). India Vital Statistics 1982. New Delhi, India: Office of the Registrar General & Census Commissioner (India).                                                                 |  |   | X |
| India         | 14 - IND | Office of the Registrar General & Census Commissioner (India). India Vital Statistics 1983. New Delhi, India: Office of the Registrar General & Census Commissioner (India).                                                                 |  |   | X |
| India         | 15 - IND | Office of the Registrar General & Census Commissioner (India). India Vital Statistics 1986. New Delhi, India: Office of the Registrar General & Census Commissioner (India).                                                                 |  |   | X |
| India         | 16 - IND | Office of the Registrar General & Census Commissioner (India). India Vital Statistics 1987. New Delhi, India: Office of the Registrar General & Census Commissioner (India).                                                                 |  |   | X |

|           |          |                                                                                                                                                                                                                                                                                                             |   |  |   |
|-----------|----------|-------------------------------------------------------------------------------------------------------------------------------------------------------------------------------------------------------------------------------------------------------------------------------------------------------------|---|--|---|
| India     | 17 - IND | Office of the Registrar General & Census Commissioner (India). India Vital Statistics 1988. New Delhi, India: Office of the Registrar General & Census Commissioner (India).                                                                                                                                |   |  | X |
| India     | 18 - IND | Office of the Registrar General & Census Commissioner (India). India Vital Statistics 1989. New Delhi, India: Office of the Registrar General & Census Commissioner (India).                                                                                                                                |   |  | X |
| India     | 19 - IND | Office of the Registrar General and Census Commissioner (India). India MCCD Vital Statistics - Deaths 1990-1998.                                                                                                                                                                                            |   |  | X |
| India     | 20 - IND | Office of the Registrar General and Census Commissioner (India). India MCCD Vital Statistics - Deaths 1999-2001.                                                                                                                                                                                            |   |  | X |
| India     | 21 - IND | Office of the Registrar General and Census Commissioner (India). India Medical Certification of Cause of Death Report 2002. New Delhi, India: Office of the Registrar General and Census Commissioner (India), 2009.                                                                                        |   |  | X |
| India     | 22 - IND | Office of the Registrar General and Census Commissioner (India). India Medical Certification of Cause of Death Report 2003. New Delhi, India: Office of the Registrar General and Census Commissioner (India), 2009.                                                                                        |   |  | X |
| India     | 23 - IND | Office of the Registrar General and Census Commissioner (India). India Medical Certification of Cause of Death Report 2004. New Delhi, India: Office of the Registrar General and Census Commissioner (India), 2009.                                                                                        |   |  | X |
| India     | 24 - IND | Office of the Registrar General and Census Commissioner (India). India Medical Certification of Cause of Death Report 2005. New Delhi, India: Office of the Registrar General and Census Commissioner (India), 2012.                                                                                        |   |  | X |
| India     | 25 - IND | Office of the Registrar General and Census Commissioner (India). India Medical Certification of Cause of Death Report 2006. New Delhi, India: Office of the Registrar General and Census Commissioner (India), 2012.                                                                                        |   |  | X |
| India     | 26 - IND | Office of the Registrar General and Census Commissioner (India). India Medical Certification of Cause of Death Report 2008. New Delhi, India: Office of the Registrar General and Census Commissioner (India), 2013.                                                                                        |   |  | X |
| Indonesia | 01 - IDN | Anwar Z, Djamil H, Pardede N, Ismail R. The pattern of the causes of death in children in rural swampy area of South Sumatra, Indonesia. Paediatr Indones. 1987; 27(6-May): 93-8.                                                                                                                           | X |  |   |
| Indonesia | 02 - IDN | National Institute of Health Research and Development (NIHRD), Ministry of Health (Indonesia). Indonesia Sample Registration System 2012, Indonesia Cause of Death Survey 2010-2011, Indonesia Mortality Registration System Strengthening Project (IMRSSP), and Indonesia Basic Health Research 2007-2008. | X |  |   |
| Iran      | 01 - IRN | Ministry of Health and Medical Education (Iran). Iran Vital Registration - Deaths 2007.                                                                                                                                                                                                                     |   |  | X |
| Iran      | 02 - IRN | Ministry of Health and Medical Education (Iran). Iran Vital Registration - Deaths 2008.                                                                                                                                                                                                                     |   |  | X |
| Iran      | 03 - IRN | Ministry of Health and Medical Education (Iran). Iran Vital Registration - Deaths 2009.                                                                                                                                                                                                                     |   |  | X |
| Iran      | 04 - IRN | Ministry of Health and Medical Education (Iran). Iran Vital Registration - Deaths 2010.                                                                                                                                                                                                                     |   |  | X |
| Iran      | 05 - IRN | World Health Organization (WHO). WHO Mortality Database Version February 2014. Geneva, Switzerland: World Health Organization (WHO), 2014.                                                                                                                                                                  |   |  | X |
| Iraq      | 01 - IRQ | World Health Organization (WHO). WHO Mortality Database Version February 2014. Geneva, Switzerland: World Health Organization (WHO), 2014.                                                                                                                                                                  |   |  | X |
| Ireland   | 01 - IRL | World Health Organization (WHO). WHO Mortality Database Version February 2014. Geneva, Switzerland: World Health Organization (WHO), 2014.                                                                                                                                                                  |   |  | X |
| Israel    | 01 - ISR | World Health Organization (WHO). WHO Mortality Database Version February 2014. Geneva, Switzerland: World Health Organization (WHO), 2014.                                                                                                                                                                  |   |  | X |
| Italy     | 01 - ITA | World Health Organization (WHO). WHO Mortality Database Version February 2014. Geneva, Switzerland: World Health Organization (WHO), 2014.                                                                                                                                                                  |   |  | X |
| Jamaica   | 01 - JAM | World Health Organization (WHO). WHO Mortality Database Version February 2014. Geneva, Switzerland: World Health Organization (WHO), 2014.                                                                                                                                                                  |   |  | X |
| Japan     | 01 - JPN | World Health Organization (WHO). WHO Mortality Database Version February 2014. Geneva, Switzerland: World Health Organization (WHO), 2014.                                                                                                                                                                  |   |  | X |

|               |          |                                                                                                                                                                                                                                                                                    |  |   |   |
|---------------|----------|------------------------------------------------------------------------------------------------------------------------------------------------------------------------------------------------------------------------------------------------------------------------------------|--|---|---|
| Jordan        | 01 - JOR | World Health Organization (WHO). WHO Mortality Database Version February 2014. Geneva, Switzerland: World Health Organization (WHO), 2014.                                                                                                                                         |  |   | X |
| Kazakhstan    | 01 - KAZ | World Health Organization (WHO). WHO Mortality Database Version February 2014. Geneva, Switzerland: World Health Organization (WHO), 2014.                                                                                                                                         |  |   | X |
| Kenya         | 01 - KEN | Hamel MJ, Adazu K, Obor D, Sewe M, Vulule J, Williamson JM, Slutsker L, Feikin DR, Laserson KF. A reversal in reductions of child mortality in western Kenya, 2003-2009. <i>Am J Trop Med Hyg.</i> 2011; 85(4): 597-605.                                                           |  | X |   |
| Kenya         | 02 - KEN | INDEPTH. Kenya - Kisumu Health and Demographic Surveillance System.                                                                                                                                                                                                                |  | X |   |
| Kenya         | 03 - KEN | INDEPTH. Kenya - Nairobi Health and Demographic Surveillance System.                                                                                                                                                                                                               |  | X |   |
| Kenya         | 04 - KEN | Mirza NM, Macharia WM, Wafula EM, Agwanda R, Onyango FE. Mortality patterns in a rural Kenyan community. <i>East Afr Med J.</i> 1990; 67(11): 823-9.                                                                                                                               |  | X |   |
| Kenya         | 05 - KEN | Oti SO, Kyobutungi C. Verbal autopsy interpretation: a comparative analysis of the InterVA model versus physician review in determining causes of death in the Nairobi DSS. <i>Popul Health Metr.</i> 2010; 8: 21.                                                                 |  | X |   |
| Kenya         | 06 - KEN | Rowe AK, Rowe SY, Snow RW, Korenromp EL, Schellenberg JR, Stein C, Nahlen BL, Bryce J, Black RE, Steketee RW. The burden of malaria mortality among African children in the year 2000. <i>Int J Epidemiol.</i> 2006; 35(3): 691-704.                                               |  | X |   |
| Kenya         | 07 - KEN | van Eijk AM, Adazu K, Ofware P, Vulule J, Hamel M, Slutsker L. Causes of deaths using verbal autopsy among adolescents and adults in rural western Kenya. <i>Trop Med Int Health.</i> 2008; 13(10): 1314-24.                                                                       |  | X |   |
| Kiribati      | 01 - KIR | World Health Organization (WHO). WHO Mortality Database Version February 2014. Geneva, Switzerland: World Health Organization (WHO), 2014.                                                                                                                                         |  |   | X |
| Kuwait        | 01 - KWT | World Health Organization (WHO). WHO Mortality Database Version February 2014. Geneva, Switzerland: World Health Organization (WHO), 2014.                                                                                                                                         |  |   | X |
| KwaZulu-Natal | 01 - ZKN | Department of Home Affairs (South Africa), Statistics South Africa. South Africa Mortality and Causes of Death 1997-2005. Pretoria, South Africa: Statistics South Africa.                                                                                                         |  |   | X |
| Kyrgyzstan    | 01 - KGZ | World Health Organization (WHO). WHO Mortality Database Version February 2014. Geneva, Switzerland: World Health Organization (WHO), 2014.                                                                                                                                         |  |   | X |
| Latvia        | 01 - LVA | World Health Organization (WHO). WHO Mortality Database Version February 2014. Geneva, Switzerland: World Health Organization (WHO), 2014.                                                                                                                                         |  |   | X |
| Limpopo       | 01 - ZLI | Department of Home Affairs (South Africa), Statistics South Africa. South Africa Mortality and Causes of Death 1997-2005. Pretoria, South Africa: Statistics South Africa.                                                                                                         |  |   | X |
| Lithuania     | 01 - LTU | World Health Organization (WHO). WHO Mortality Database Version February 2014. Geneva, Switzerland: World Health Organization (WHO), 2014.                                                                                                                                         |  |   | X |
| Luxembourg    | 01 - LUX | World Health Organization (WHO). WHO Mortality Database Version February 2014. Geneva, Switzerland: World Health Organization (WHO), 2014.                                                                                                                                         |  |   | X |
| Macedonia     | 01 - MKD | World Health Organization (WHO). WHO Mortality Database Version February 2014. Geneva, Switzerland: World Health Organization (WHO), 2014.                                                                                                                                         |  |   | X |
| Madagascar    | 01 - MDG | Population and Development Research Center (CEPED) (France). Madagascar - Antananorivo Mortality Report 1984-1995.                                                                                                                                                                 |  |   | X |
| Malawi        | 01 - MWI | Checchi F, Nyasulu P, Chandramohan D, Roberts B. Rates and causes of death in Chiradzulu District, Malawi, 2008: a key informant study. <i>Trop Med Int Health.</i> 2011; 16(3): 375-8.                                                                                            |  | X |   |
| Malawi        | 02 - MWI | Chihana M, Floyd S, Molesworth A, Crampin AC, Kayuni N, Price A, Zaba B, Jahn A, Mvula H, Dube A, Ngwira B, Glynn JR, French N. Adult mortality and probable cause of death in rural northern Malawi in the era of HIV treatment. <i>Trop Med Int Health.</i> 2012; 17(8): E74-83. |  | X |   |
| Malawi        | 03 - MWI | Jahn A, Floyd S, Crampin AC, Mvula H, Mwinuka V, Mwaiyeghele E, McGrath N, Zaba B, Fine PEM, Glynn JR. Declining child mortality in northern Malawi despite high rates of infection with HIV. <i>Bull World Health Organ.</i> 2010; 88: 746-53.                                    |  | X |   |

|           |          |                                                                                                                                                                                                           |  |   |   |
|-----------|----------|-----------------------------------------------------------------------------------------------------------------------------------------------------------------------------------------------------------|--|---|---|
| Malawi    | 04 - MWI | Slutsker L, Bloland P, Steketee RW, Wirima JJ, Heymann DL, Breman JG. Infant and second-year mortality in rural Malawi: causes and descriptive epidemiology. Am J Trop Med Hyg. 1996; 55(1 Suppl): 77-81. |  | X |   |
| Malaysia  | 01 - MYS | Department of Statistics (Malaysia).Vital Statistics: West Malaysia 1969. Kuala Lumpur, Malaysia:Department of Statistics (Malaysia), 1971.                                                               |  |   | X |
| Malaysia  | 02 - MYS | World Health Organization (WHO). WHO Mortality Database Version February 2014. Geneva, Switzerland: World Health Organization (WHO), 2014.                                                                |  |   | X |
| Maldives  | 01 - MDV | World Health Organization (WHO). WHO Mortality Database Version February 2014. Geneva, Switzerland: World Health Organization (WHO), 2014.                                                                |  |   | X |
| Mali      | 01 - MLI | National Institute for Demographic Studies (France), Sahel Institute. Mali Twelve Years of Urban Mortality in the Sahel 1974-1985. 1988.                                                                  |  |   | X |
| Malta     | 01 - MLT | World Health Organization (WHO). WHO Mortality Database Version February 2014. Geneva, Switzerland: World Health Organization (WHO), 2014.                                                                |  |   | X |
| Mauritius | 01 - MUS | World Health Organization (WHO). WHO Mortality Database Version February 2014. Geneva, Switzerland: World Health Organization (WHO), 2014.                                                                |  |   | X |
| Mexico    | 01 - MEX | Ministry of Health (Mexico), National Institute of Statistics and Geography (Mexico). Mexico Vital Registration - Deaths 1980 .                                                                           |  |   | X |
| Mexico    | 02 - MEX | Ministry of Health (Mexico), National Institute of Statistics and Geography (Mexico). Mexico Vital Registration - Deaths 1981 .                                                                           |  |   | X |
| Mexico    | 03 - MEX | Ministry of Health (Mexico), National Institute of Statistics and Geography (Mexico). Mexico Vital Registration - Deaths 1982.                                                                            |  |   | X |
| Mexico    | 04 - MEX | Ministry of Health (Mexico), National Institute of Statistics and Geography (Mexico). Mexico Vital Registration - Deaths 1983.                                                                            |  |   | X |
| Mexico    | 05 - MEX | Ministry of Health (Mexico), National Institute of Statistics and Geography (Mexico). Mexico Vital Registration - Deaths 1984.                                                                            |  |   | X |
| Mexico    | 06 - MEX | Ministry of Health (Mexico), National Institute of Statistics and Geography (Mexico). Mexico Vital Registration - Deaths 1985.                                                                            |  |   | X |
| Mexico    | 07 - MEX | Ministry of Health (Mexico), National Institute of Statistics and Geography (Mexico). Mexico Vital Registration - Deaths 1986.                                                                            |  |   | X |
| Mexico    | 08 - MEX | Ministry of Health (Mexico), National Institute of Statistics and Geography (Mexico). Mexico Vital Registration - Deaths 1987.                                                                            |  |   | X |
| Mexico    | 09 - MEX | Ministry of Health (Mexico), National Institute of Statistics and Geography (Mexico). Mexico Vital Registration - Deaths 1988.                                                                            |  |   | X |
| Mexico    | 10 - MEX | Ministry of Health (Mexico), National Institute of Statistics and Geography (Mexico). Mexico Vital Registration - Deaths 1989.                                                                            |  |   | X |
| Mexico    | 11 - MEX | Ministry of Health (Mexico), National Institute of Statistics and Geography (Mexico). Mexico Vital Registration - Deaths 1990.                                                                            |  |   | X |
| Mexico    | 12 - MEX | Ministry of Health (Mexico), National Institute of Statistics and Geography (Mexico). Mexico Vital Registration - Deaths 1991.                                                                            |  |   | X |
| Mexico    | 13 - MEX | Ministry of Health (Mexico), National Institute of Statistics and Geography (Mexico). Mexico Vital Registration - Deaths 1992.                                                                            |  |   | X |
| Mexico    | 14 - MEX | Ministry of Health (Mexico), National Institute of Statistics and Geography (Mexico). Mexico Vital Registration - Deaths 1993.                                                                            |  |   | X |
| Mexico    | 15 - MEX | Ministry of Health (Mexico), National Institute of Statistics and Geography (Mexico). Mexico Vital Registration - Deaths 1994.                                                                            |  |   | X |
| Mexico    | 16 - MEX | Ministry of Health (Mexico), National Institute of Statistics and Geography (Mexico). Mexico Vital Registration - Deaths 1995.                                                                            |  |   | X |
| Mexico    | 17 - MEX | Ministry of Health (Mexico), National Institute of Statistics and Geography (Mexico). Mexico Vital Registration - Deaths 1996.                                                                            |  |   | X |
| Mexico    | 18 - MEX | Ministry of Health (Mexico), National Institute of Statistics and Geography (Mexico). Mexico Vital Registration - Deaths 1997.                                                                            |  |   | X |
| Mexico    | 19 - MEX | Ministry of Health (Mexico), National Institute of Statistics and Geography (Mexico). Mexico Vital Registration - Deaths 1998.                                                                            |  |   | X |
| Mexico    | 20 - MEX | Ministry of Health (Mexico), National Institute of Statistics and Geography (Mexico). Mexico Vital Registration - Deaths 1999.                                                                            |  |   | X |
| Mexico    | 21 - MEX | Ministry of Health (Mexico), National Institute of Statistics and Geography (Mexico). Mexico Vital Registration - Deaths 2000.                                                                            |  |   | X |
| Mexico    | 22 - MEX | Ministry of Health (Mexico), National Institute of Statistics and Geography (Mexico). Mexico Vital Registration - Deaths 2001.                                                                            |  |   | X |
| Mexico    | 23 - MEX | Ministry of Health (Mexico), National Institute of Statistics and Geography (Mexico). Mexico Vital Registration - Deaths 2002.                                                                            |  |   | X |
| Mexico    | 24 - MEX | Ministry of Health (Mexico), National Institute of Statistics and Geography (Mexico). Mexico Vital Registration - Deaths 2003.                                                                            |  |   | X |
| Mexico    | 25 - MEX | Ministry of Health (Mexico), National Institute of Statistics and Geography (Mexico). Mexico Vital Registration - Deaths 2004.                                                                            |  |   | X |



|               |          |                                                                                                                                                                                                                                                                                                                                            |   |  |   |
|---------------|----------|--------------------------------------------------------------------------------------------------------------------------------------------------------------------------------------------------------------------------------------------------------------------------------------------------------------------------------------------|---|--|---|
| Mexico        | 26 - MEX | Ministry of Health (Mexico), National Institute of Statistics and Geography (Mexico). Mexico Vital Registration - Deaths 2005.                                                                                                                                                                                                             |   |  | X |
| Mexico        | 27 - MEX | Ministry of Health (Mexico), National Institute of Statistics and Geography (Mexico). Mexico Vital Registration - Deaths 2006.                                                                                                                                                                                                             |   |  | X |
| Mexico        | 28 - MEX | Ministry of Health (Mexico), National Institute of Statistics and Geography (Mexico). Mexico Vital Registration - Deaths 2007.                                                                                                                                                                                                             |   |  | X |
| Mexico        | 29 - MEX | Ministry of Health (Mexico), National Institute of Statistics and Geography (Mexico). Mexico Vital Registration - Deaths 2008.                                                                                                                                                                                                             |   |  | X |
| Mexico        | 30 - MEX | Ministry of Health (Mexico), National Institute of Statistics and Geography (Mexico). Mexico Vital Registration - Deaths 2010.                                                                                                                                                                                                             |   |  | X |
| Mexico        | 31 - MEX | Ministry of Health (Mexico), National Institute of Statistics and Geography (Mexico). Mexico Vital Registration - Deaths 2011.                                                                                                                                                                                                             |   |  | X |
| Mexico        | 32 - MEX | National Institute of Statistics and Geography (Mexico). Mexico Vital Registration - Deaths 2012.                                                                                                                                                                                                                                          |   |  | X |
| Mexico        | 33 - MEX | National Institute of Statistics and Geography (Mexico). Mexico Vital Statistics - Deaths 2009 .                                                                                                                                                                                                                                           |   |  | X |
| Moldova       | 01 - MDA | World Health Organization (WHO). WHO Mortality Database Version February 2014. Geneva, Switzerland: World Health Organization (WHO), 2014.                                                                                                                                                                                                 |   |  | X |
| Montenegro    | 01 - MNE | World Health Organization (WHO). WHO Mortality Database Version February 2014. Geneva, Switzerland: World Health Organization (WHO), 2014.                                                                                                                                                                                                 |   |  | X |
| Morocco       | 01 - MAR | World Health Organization (WHO). WHO Mortality Database Version February 2014. Geneva, Switzerland: World Health Organization (WHO), 2014.                                                                                                                                                                                                 |   |  | X |
| Mozambique    | 01 - MOZ | Centers for Disease Control and Prevention (CDC), MEASURE Evaluation Project, Carolina Population Center, University of North Carolina, Ministry of Health (Mozambique), National Statistics Institute (Mozambique), US Census Bureau. Mozambique National Survey on the Causes of Death 2007-2008.                                        | X |  |   |
| Mozambique    | 02 - MOZ | INDEPTH. Mozambique - Manhiça Health and Demographic Surveillance System.                                                                                                                                                                                                                                                                  | X |  |   |
| Mozambique    | 03 - MOZ | Sacaral J, Nhacolo AQ, Sigaúque B, Nhalungo DA, Abacassamo F, Sacoor CN, Aide P, Machevo S, Nhampossa T, Macete EV, Bassat Q, David C, Bardaji A, Letang E, Saúde F, Aponte JJ, Thompson R, Alonso PL. A 10 year study of the cause of death in children under 15 years in Manhiça, Mozambique. BioMed Central Public Health. 2009; 9: 67. | X |  |   |
| Mpumalanga    | 01 - ZMP | Department of Home Affairs (South Africa), Statistics South Africa. South Africa Mortality and Causes of Death 1997-2005. Pretoria, South Africa: Statistics South Africa.                                                                                                                                                                 |   |  | X |
| Myanmar       | 01 - MMR | Myint, S. Cause of death verification study in Myanmar. Presentation at: World Health Organization Regional Office for South East Asia. Regional Consultation on Mortality Statistics. 2007; New Delhi, India.                                                                                                                             | X |  |   |
| Myanmar       | 02 - MMR | Ohnmar, Tun-Min, San-Shwe, Than-Win, Chongsuvivatwong V. Effects of malaria volunteer training on coverage and timeliness of diagnosis: a cluster randomized controlled trial in Myanmar. Malar J. 2012; 309.                                                                                                                              | X |  |   |
| Netherlands   | 01 - NLD | World Health Organization (WHO). WHO Mortality Database Version February 2014. Geneva, Switzerland: World Health Organization (WHO), 2014.                                                                                                                                                                                                 |   |  | X |
| New Zealand   | 01 - NZL | World Health Organization (WHO). WHO Mortality Database Version February 2014. Geneva, Switzerland: World Health Organization (WHO), 2014.                                                                                                                                                                                                 |   |  | X |
| Nicaragua     | 01 - NIC | World Health Organization (WHO). WHO Mortality Database Version February 2014. Geneva, Switzerland: World Health Organization (WHO), 2014.                                                                                                                                                                                                 |   |  | X |
| Nigeria       | 01 - NGA | Ekanem EE, Asindi AA, Okoi OU. Community-based surveillance of paediatric deaths in Cross River State, Nigeria. Tropical and Geographical Medicine. 1994; 46(5): 305-8.                                                                                                                                                                    | X |  |   |
| Nigeria       | 02 - NGA | Lawoyin TO. Infant and maternal deaths in rural south west Nigeria: a prospective study. Afr J Med Med Sci. 2007; 36(3): 235-41.                                                                                                                                                                                                           | X |  |   |
| North-West    | 01 - ZNW | Department of Home Affairs (South Africa), Statistics South Africa. South Africa Mortality and Causes of Death 1997-2005. Pretoria, South Africa: Statistics South Africa.                                                                                                                                                                 |   |  | X |
| Northern Cape | 01 - ZNC | Department of Home Affairs (South Africa), Statistics South Africa. South Africa Mortality and Causes of Death 1997-2005. Pretoria, South Africa: Statistics South Africa.                                                                                                                                                                 |   |  | X |
| Norway        | 01 - NOR | World Health Organization (WHO). WHO Mortality Database Version February 2014. Geneva, Switzerland: World Health Organization (WHO), 2014.                                                                                                                                                                                                 |   |  | X |

|                  |          |                                                                                                                                                                                                                                                                                          |   |   |   |
|------------------|----------|------------------------------------------------------------------------------------------------------------------------------------------------------------------------------------------------------------------------------------------------------------------------------------------|---|---|---|
| Oman             | 01 - OMN | World Health Organization (WHO). WHO Mortality Database Version February 2014. Geneva, Switzerland: World Health Organization (WHO), 2014.                                                                                                                                               |   |   | X |
| Pakistan         | 01 - PAK | Khan AJ, Khan JA, Akbar M, Addiss DG. Acute respiratory infections in children: a case management intervention in Abbottabad District, Pakistan. Bull World Health Organ. 1990; 68(5): 577-85.                                                                                           |   | X |   |
| Pakistan         | 02 - PAK | National Institute of Population Studies (NIPS) (Pakistan), Macro International, Inc. Pakistan Demographic and Health Survey 2006-2007. Calverton, United States: Macro International, Inc.                                                                                              |   | X |   |
| Palestine        | 01 - PSE | World Health Organization (WHO). WHO Mortality Database Version February 2014. Geneva, Switzerland: World Health Organization (WHO), 2014.                                                                                                                                               |   |   | X |
| Panama           | 01 - PAN | World Health Organization (WHO). WHO Mortality Database Version February 2014. Geneva, Switzerland: World Health Organization (WHO), 2014.                                                                                                                                               |   |   | X |
| Papua New Guinea | 01 - PNG | Genton B, al-Yaman F, Beck HP, Hii J, Mellor S, Rare L, Ginny M, Smith T, Alpers MP. The epidemiology of malaria in the Wosera area, East Sepik Province, Papua New Guinea, in preparation for vaccine trials. II. Mortality and morbidity. Ann Trop Med Parasitol. 1995; 89(4): 377-90. |   | X |   |
| Papua New Guinea | 02 - PNG | Kakazo M, Lehmann D, Coakley K, Gratten H, Saleu G, Taime J, Riley ID, Alpers MP. Mortality rates and the utilization of health services during terminal illness in the Asaro Valley, Eastern Highlands Province, Papua New Guinea. P N G Med J. 1999; 42(2-Jan): 13-26.                 |   | X |   |
| Papua New Guinea | 03 - PNG | Lehmann D. Demography and causes of death among the Huli in the Tari Basin. P N G Med J. 2002; 45(1-2): 51-62.                                                                                                                                                                           |   | X |   |
| Papua New Guinea | 04 - PNG | Moir JS, Garner PA, Heywood PF, Alpers MP. Mortality in a rural area of Madang Province, Papua New Guinea. Ann Trop Med Parasitol. 1989; 83(3): 305-19.                                                                                                                                  |   | X |   |
| Papua New Guinea | 05 - PNG | World Health Organization (WHO). WHO Mortality Database Version February 2014. Geneva, Switzerland: World Health Organization (WHO), 2014.                                                                                                                                               |   |   | X |
| Paraguay         | 01 - PRY | World Health Organization (WHO). WHO Mortality Database Version February 2014. Geneva, Switzerland: World Health Organization (WHO), 2014.                                                                                                                                               |   |   | X |
| Peru             | 01 - PER | World Health Organization (WHO). WHO Mortality Database Version February 2014. Geneva, Switzerland: World Health Organization (WHO), 2014.                                                                                                                                               |   |   | X |
| Philippines      | 01 - PHL | National Epidemiology Center, Department of Health (Philippines). Philippines Field Health Service Information System Annual Report 1993. Manila, Philippines: National Epidemiology Center, Department of Health (Philippines).                                                         | X |   |   |
| Philippines      | 02 - PHL | World Health Organization (WHO). WHO Mortality Database Version February 2014. Geneva, Switzerland: World Health Organization (WHO), 2014.                                                                                                                                               |   |   | X |
| Poland           | 01 - POL | World Health Organization (WHO). WHO Mortality Database Version February 2014. Geneva, Switzerland: World Health Organization (WHO), 2014.                                                                                                                                               |   |   | X |
| Portugal         | 01 - PRT | World Health Organization (WHO). WHO Mortality Database Version February 2014. Geneva, Switzerland: World Health Organization (WHO), 2014.                                                                                                                                               |   |   | X |
| Puerto Rico      | 01 - PRI | World Health Organization (WHO). WHO Mortality Database Version February 2014. Geneva, Switzerland: World Health Organization (WHO), 2014.                                                                                                                                               |   |   | X |
| Qatar            | 01 - QAT | World Health Organization (WHO). WHO Mortality Database Version February 2014. Geneva, Switzerland: World Health Organization (WHO), 2014.                                                                                                                                               |   |   | X |
| Romania          | 01 - ROU | World Health Organization (WHO). WHO Mortality Database Version February 2014. Geneva, Switzerland: World Health Organization (WHO), 2014.                                                                                                                                               |   |   | X |
| Russia           | 01 - RUS | Center for Demographic Research, New Economic School (Russia). Russia Mortality Rates by Region, Age, Sex, and Cause of Death 1989-1998. Moscow, Russia: Center for Demographic Research, New Economic School (Russia).                                                                  |   |   | X |
| Russia           | 02 - RUS | World Health Organization (WHO). WHO Mortality Database Version February 2014. Geneva, Switzerland: World Health Organization (WHO), 2014.                                                                                                                                               |   |   | X |
| Saint Lucia      | 01 - LCA | World Health Organization (WHO). WHO Mortality Database Version February 2014. Geneva, Switzerland: World Health Organization (WHO), 2014.                                                                                                                                               |   |   | X |

|                                  |          |                                                                                                                                                                                                                                                                           |  |   |   |
|----------------------------------|----------|---------------------------------------------------------------------------------------------------------------------------------------------------------------------------------------------------------------------------------------------------------------------------|--|---|---|
| Saint Vincent and the Grenadines | 01 - VCT | World Health Organization (WHO). WHO Mortality Database Version February 2014. Geneva, Switzerland: World Health Organization (WHO), 2014.                                                                                                                                |  |   | X |
| Sao Tome and Principe            | 01 - STP | World Health Organization (WHO). WHO Mortality Database Version February 2014. Geneva, Switzerland: World Health Organization (WHO), 2014.                                                                                                                                |  |   | X |
| Senegal                          | 01 - SEN | Etard JF, Le Hesran JY, Diallo A, Diallo JP, Ndiaye JL, Delaunay V. Childhood mortality and probable causes of death using verbal autopsy in Niakhar, Senegal, 1989-2000. Int J Epidemiol. 2004; 33(6): 1286-92.                                                          |  | X |   |
| Senegal                          | 02 - SEN | Garenne M, Willie D, Maire B, Fontaine O, Eeckels R, Briend A, Van den Broeck J. Incidence and duration of severe wasting in two African populations. Public Health Nutr. 2009; 12(11): 1974-82.                                                                          |  | X |   |
| Senegal                          | 03 - SEN | Population and Development Research Center (CEPED) (France). Senegal - Niakhar Risk of death associated with different nutritional states in children preschool age. Population and Development Research Center (CEPED) (France).                                         |  | X |   |
| Senegal                          | 04 - SEN | Trape JF, Pison G, Preziosi MP, Enel C, Desgrées du Loû A, Delaunay V, Samb B, Lagarde E, Molez JF, Simondon F. Impact of chloroquine resistance on malaria mortality. Comptes Rendus de l'Académie des Sciences - Series III - Sciences de la Vie. 1998; 321(8): 689-97. |  | X |   |
| Serbia                           | 01 - SRB | World Health Organization (WHO). WHO Mortality Database Version February 2014. Geneva, Switzerland: World Health Organization (WHO), 2014.                                                                                                                                |  |   | X |
| Seychelles                       | 01 - SYC | World Health Organization (WHO). WHO Mortality Database Version February 2014. Geneva, Switzerland: World Health Organization (WHO), 2014.                                                                                                                                |  |   | X |
| Sierra Leone                     | 01 - SLE | Amin R. Immunization coverage and child mortality in two rural districts of Sierra Leone. Soc Sci Med. 1996; 42(11): 1599-604.                                                                                                                                            |  | X |   |
| Sierra Leone                     | 02 - SLE | Barnish G, Maude GH, Bockarie MJ, Eggele TA, Greenwood BM, Ceesay S. Malaria in a rural area of Sierra Leone. I. Initial results. Ann Trop Med Parasitol. 1993; 87(2): 125-36.                                                                                            |  | X |   |
| Singapore                        | 01 - SGP | World Health Organization (WHO). WHO Mortality Database Version February 2014. Geneva, Switzerland: World Health Organization (WHO), 2014.                                                                                                                                |  |   | X |
| Slovakia                         | 01 - SVK | World Health Organization (WHO). WHO Mortality Database Version February 2014. Geneva, Switzerland: World Health Organization (WHO), 2014.                                                                                                                                |  |   | X |
| Slovenia                         | 01 - SVN | World Health Organization (WHO). WHO Mortality Database Version February 2014. Geneva, Switzerland: World Health Organization (WHO), 2014.                                                                                                                                |  |   | X |
| South Africa                     | 01 - ZAF | Kahn K, Tollman SM, Garenne M, Gear JS. Validation and application of verbal autopsies in a rural area of South Africa. Trop Med Int Health. 2000; 5(11): 824-31.                                                                                                         |  | X |   |
| South Africa                     | 02 - ZAF | MRC/Wits Rural Public Health and Health Transitions Research Unit (Agincourt) INDEPTH. South Africa - Agincourt Health and Socio-Demographic Surveillance System.                                                                                                         |  | X |   |
| South Africa                     | 03 - ZAF | Muhwava W. Contributions of the Africa Centre Demographic Surveillance to the Community. <em>Umbiko</em>. 2007; 12: 3-4.                                                                                                                                                  |  | X |   |
| South Africa                     | 04 - ZAF | World Health Organization (WHO). WHO Mortality Database Version February 2014. Geneva, Switzerland: World Health Organization (WHO), 2014.                                                                                                                                |  |   | X |
| South Korea                      | 01 - KOR | World Health Organization (WHO). WHO Mortality Database Version February 2014. Geneva, Switzerland: World Health Organization (WHO), 2014.                                                                                                                                |  |   | X |
| Spain                            | 01 - ESP | World Health Organization (WHO). WHO Mortality Database Version February 2014. Geneva, Switzerland: World Health Organization (WHO), 2014.                                                                                                                                |  |   | X |
| Sri Lanka                        | 01 - LKA | Registrar General's Department (Sri Lanka). Sri Lanka Vital Statistics - Deaths 1993-1996.                                                                                                                                                                                |  |   | X |
| Sri Lanka                        | 02 - LKA | World Health Organization (WHO). WHO Mortality Database Version February 2014. Geneva, Switzerland: World Health Organization (WHO), 2014.                                                                                                                                |  |   | X |
| Suriname                         | 01 - SUR | World Health Organization (WHO). WHO Mortality Database Version February 2014. Geneva, Switzerland: World Health Organization (WHO), 2014.                                                                                                                                |  |   | X |
| Sweden                           | 01 - SWE | World Health Organization (WHO). WHO Mortality Database Version February 2014. Geneva, Switzerland: World Health Organization (WHO), 2014.                                                                                                                                |  |   | X |
| Switzerland                      | 01 - CHE | World Health Organization (WHO). WHO Mortality Database Version February 2014. Geneva, Switzerland: World Health Organization (WHO), 2014.                                                                                                                                |  |   | X |

|            |          |                                                                                                                                                                                                                                                                             |   |   |   |
|------------|----------|-----------------------------------------------------------------------------------------------------------------------------------------------------------------------------------------------------------------------------------------------------------------------------|---|---|---|
| Syria      | 01 - SYR | World Health Organization (WHO). WHO Mortality Database Version February 2014. Geneva, Switzerland: World Health Organization (WHO), 2014.                                                                                                                                  |   |   | X |
| Taiwan     | 01 - TWN | Department of Health (Taiwan). Taiwan Statistics of Causes of Death 2008.                                                                                                                                                                                                   |   |   | X |
| Taiwan     | 02 - TWN | Department of Health (Taiwan). Taiwan Statistics of Causes of Death 2009.                                                                                                                                                                                                   |   |   | X |
| Taiwan     | 03 - TWN | Department of Health (Taiwan). Taiwan Statistics of Causes of Death 2010.                                                                                                                                                                                                   |   |   | X |
| Taiwan     | 04 - TWN | Department of Health (Taiwan). Taiwan Statistics of Causes of Death 2011.                                                                                                                                                                                                   |   |   | X |
| Taiwan     | 05 - TWN | Department of Health (Taiwan). Taiwan Statistics of Causes of Death 2012.                                                                                                                                                                                                   |   |   | X |
| Taiwan     | 06 - TWN | Department of Health (Taiwan). Taiwan Vital Statistics - Deaths 2007.                                                                                                                                                                                                       |   |   | X |
| Tajikistan | 01 - TJK | United Nations Children's Fund (UNICEF). Tajikistan Infant Mortality Report 2001-2003.                                                                                                                                                                                      |   | X |   |
| Tajikistan | 02 - TJK | World Health Organization (WHO). WHO Mortality Database Version February 2014. Geneva, Switzerland: World Health Organization (WHO), 2014.                                                                                                                                  |   |   | X |
| Tanzania   | 01 - TZA | Ae-Ngibise KA, Masanja H, Kellerman R, Owusu-Agyei S. Risk factors for injury mortality in rural Tanzania: a secondary data analysis. <i>BMJ Open</i> . 2012; 2(6): e001721.                                                                                                |   | X |   |
| Tanzania   | 02 - TZA | INDEPTH. Tanzania - Ifakara Health and Demographic Surveillance System.                                                                                                                                                                                                     |   | X |   |
| Tanzania   | 03 - TZA | INDEPTH. Tanzania - Rufiji Health and Demographic Surveillance System.                                                                                                                                                                                                      |   | X |   |
| Tanzania   | 04 - TZA | Illah E, Mbaruku G, Masanja H, Kahn K. Causes and risk factors for maternal mortality in rural Tanzania--case of Rufiji Health and Demographic Surveillance Site (HDSS). <i>Afr J Reprod Health</i> . 2013; 17(3): 119-30.                                                  | X |   |   |
| Tanzania   | 05 - TZA | Kaatano GM, Mashauri FM, Kinung'hi SM, Mwanga JR, Malima RC, Kishamawe C, Nnko SE, Magesa SM, Mboera LE. Patterns of malaria related mortality based on verbal autopsy in Muleba District, north-western Tanzania. <i>Tanzan J Health Res</i> . 2009; 11(4): 210-8.         |   | X |   |
| Tanzania   | 06 - TZA | Kamara MK. Clustering of mortality among children under five years due to malaria at the Ifakara Demographic Surveillance Site in Tanzania [Dissertation]. [Johannesburg]: <span dir="ltr">University of the Witwatersrand; 2008.                                           |   | X |   |
| Tanzania   | 07 - TZA | Ministry of Health and Social Welfare (Tanzania), Newcastle University, UK Department for International Development (DFID). Tanzania Policy Implications of Mortality Burden 1995-2001.                                                                                     |   | X |   |
| Tanzania   | 08 - TZA | Mtango FD, Neuvians D, Broome CV, Hightower AW, Pio A. Risk factors for deaths in children under 5 years old in Bagamoyo district, Tanzania. <i>Trop Med Parasitol</i> . 1992; 43(4): 229-33.                                                                               |   | X |   |
| Tanzania   | 09 - TZA | Narah-Bana, S. Risk Factors and Causes of Adult Deaths in the Ifakara Health and Demographic Surveillance System Population, 2003-2007 [dissertation]. [Johannesburg, South Africa]: University of the Witwatersrand; 2010. 174 p.                                          |   | X |   |
| Tanzania   | 10 - TZA | Narah-Bana SA, Chirwa TF, Mwanyangala MA, Nathan R. Muertes de adultos y el futuro: Un análisis causa-especifico de las muertes de adultos de un estudio longitudinal en Tanzania rural 2003-2007. <i>Trop Med Int Health</i> . 2012; 17(11): 1396-404.                     |   | X |   |
| Tanzania   | 11 - TZA | Premji Z, Ndayanga P, Shiff C, Minjas J, Lubega P, MacLeod J. Community based studies on childhood mortality in a malaria holoendemic area on the Tanzanian coast. <i>Acta Trop</i> . 1997; 63(2-3): 101-9.                                                                 |   | X |   |
| Tanzania   | 12 - TZA | Salum FM, Wilkes TJ, Kivumbi K, Curtis CF. Mortality of under-fives in a rural area of holoendemic malaria transmission. <i>Acta Trop</i> . 1994; 58(1): 29-34.                                                                                                             |   | X |   |
| Tanzania   | 13 - TZA | Sangber-Dery MD. The Role of Birth Order in Infant Mortality in Ifakara DSS Area in Rural Tanzania [master's thesis]. [Johannesburg, South Africa]: University of the Witwatersrand; 2009.                                                                                  |   | X |   |
| Tanzania   | 14 - TZA | Sazawal S, Black RE, Ramsan M, Chwaya HM, Dutta A, Dhingra U, Stoltzfus RJ, Othman MK, Kabole FM. Effect of zinc supplementation on mortality in children aged 1-48 months: a community-based randomised placebo-controlled trial. <i>Lancet</i> . 2007; 369(9565): 927-34. |   | X |   |
| Thailand   | 01 - THA | Ministry of Public Health (Thailand). Thailand Burden of Disease and Injuries 1998-1999.                                                                                                                                                                                    |   | X |   |

|                     |          |                                                                                                                                                                                                                                                                        |   |  |   |
|---------------------|----------|------------------------------------------------------------------------------------------------------------------------------------------------------------------------------------------------------------------------------------------------------------------------|---|--|---|
| Thailand            | 02 - THA | World Health Organization (WHO). WHO Mortality Database Version February 2014. Geneva, Switzerland: World Health Organization (WHO), 2014.                                                                                                                             |   |  | X |
| The Bahamas         | 01 - BHS | World Health Organization (WHO). WHO Mortality Database Version February 2014. Geneva, Switzerland: World Health Organization (WHO), 2014.                                                                                                                             |   |  | X |
| The Gambia          | 01 - GMB | Alonso PL, Lindsay SW, Armstrong JRM, de Francisco A, Shenton FC, Greenwood BM, Conteh M, Cham K, Hill AG, David PH, Fegan G, Hall AJ. The effect of insecticide-treated bed nets on mortality of Gambian children. Lancet. 1991; 337(8756): 1499-502.                 | X |  |   |
| The Gambia          | 02 - GMB | D'Alessandro U, Olaleye BO, McGuire W, Langerock P, Bennett S, Aikins MK, Thomson MC, Cham MK, Cham BA, Greenwood BM. Mortality and morbidity from malaria in Gambian children after introduction of an impregnated bednet programme. Lancet. 1995; 345(8948): 479-83. | X |  |   |
| The Gambia          | 03 - GMB | Greenwood BM, Greenwood AM, Bradley AK, Tulloch S, Hayes R, Oldfield FS. Deaths in infancy and early childhood in a well-vaccinated, rural, West African population. Ann Trop Paediatr. 1987; 7 (2): 91-9.                                                             | X |  |   |
| The Gambia          | 04 - GMB | Jaffar S, Leach A, Greenwood AM, Jepson A, Muller O, Ota MO, Bojang K, Obaro S, Greenwood BM. Changes in the pattern of infant and childhood mortality in upper river division, The Gambia, from 1989 to 1993. Trop Med Int Health. 1997; 2(1): 28-37.                 | X |  |   |
| The Gambia          | 05 - GMB | Menon A, Snow RW, Byass P, Greenwood BM, Hayes RJ, N'Jie AB. Sustained protection against mortality and morbidity from malaria in rural Gambian children by chemoprophylaxis given by village health workers. Trans R Soc Trop Med Hyg. 1990; 84(6): 768-72.           | X |  |   |
| Trinidad and Tobago | 01 - TTO | World Health Organization (WHO). WHO Mortality Database Version February 2014. Geneva, Switzerland: World Health Organization (WHO), 2014.                                                                                                                             |   |  | X |
| Turkey              | 01 - TUR | Baskent University, Ministry of Health (Turkey), State Institute of Statistics (Turkey). Turkey Verbal Autopsy Survey 2003.                                                                                                                                            | X |  |   |
| Turkey              | 02 - TUR | Turkish Statistical Institute. Turkey Causes of Death Statistics 2010-2012. Ankara Turkey: Turkish Statistical Institute.                                                                                                                                              |   |  | X |
| Turkey              | 03 - TUR | World Health Organization (WHO). WHO Mortality Database Version February 2014. Geneva, Switzerland: World Health Organization (WHO), 2014.                                                                                                                             |   |  | X |
| Turkmenistan        | 01 - TKM | World Health Organization (WHO). WHO Mortality Database Version February 2014. Geneva, Switzerland: World Health Organization (WHO), 2014.                                                                                                                             |   |  | X |
| Uganda              | 01 - UGA | MEASURE Evaluation Project, Carolina Population Center, University of North Carolina, Macro International, Inc, Uganda Bureau of Statistics. Uganda Child Verbal Autopsy Study 2007. Macro International, Inc.                                                         | X |  |   |
| Ukraine             | 01 - UKR | World Health Organization (WHO). WHO Mortality Database Version February 2014. Geneva, Switzerland: World Health Organization (WHO), 2014.                                                                                                                             |   |  | X |
| United Kingdom      | 01 - GBR | National Records of Scotland. United Kingdom - Scotland Vital Events Reference Tables 2011. Edinburgh, Scotland: National Records of Scotland.                                                                                                                         |   |  | X |
| United Kingdom      | 02 - GBR | National Records of Scotland. United Kingdom - Scotland Vital Events Reference Tables 2012. Edinburgh, Scotland: National Records of Scotland.                                                                                                                         |   |  | X |
| United Kingdom      | 03 - GBR | Northern Ireland Statistics and Research Agency (NISRA). United Kingdom - Northern Ireland Registrar General Annual Report 2011. Belfast, Northern Ireland: Northern Ireland Statistics and Research Agency (NISRA), 2012.                                             |   |  | X |
| United Kingdom      | 04 - GBR | Office for National Statistics (United Kingdom). United Kingdom - England and Wales Mortality Data 1981-1994. Newport, United Kingdom: Office for National Statistics (United Kingdom).                                                                                |   |  | X |
| United Kingdom      | 05 - GBR | Office for National Statistics (United Kingdom). United Kingdom - England and Wales Mortality Data 1995-2000. Newport, United Kingdom: Office for National Statistics (United Kingdom).                                                                                |   |  | X |
| United Kingdom      | 06 - GBR | Office for National Statistics (United Kingdom). United Kingdom - England and Wales Mortality Data 2001-2012. Newport, United Kingdom: Office for National Statistics (United Kingdom).                                                                                |   |  | X |
| United Kingdom      | 07 - GBR | World Health Organization (WHO). WHO Mortality Database Version February 2014. Geneva, Switzerland: World Health Organization (WHO), 2014.                                                                                                                             |   |  | X |
| United States       | 01 - USA | World Health Organization (WHO). WHO Mortality Database Version February 2014. Geneva, Switzerland: World Health Organization (WHO), 2014.                                                                                                                             |   |  | X |

|              |          |                                                                                                                                                                                                                                                                                                                           |  |   |   |
|--------------|----------|---------------------------------------------------------------------------------------------------------------------------------------------------------------------------------------------------------------------------------------------------------------------------------------------------------------------------|--|---|---|
| Uruguay      | 01 - URY | World Health Organization (WHO). WHO Mortality Database Version February 2014. Geneva, Switzerland: World Health Organization (WHO), 2014.                                                                                                                                                                                |  |   | X |
| Uzbekistan   | 01 - UZB | World Health Organization (WHO). WHO Mortality Database Version February 2014. Geneva, Switzerland: World Health Organization (WHO), 2014.                                                                                                                                                                                |  |   | X |
| Venezuela    | 01 - VEN | World Health Organization (WHO). WHO Mortality Database Version February 2014. Geneva, Switzerland: World Health Organization (WHO), 2014.                                                                                                                                                                                |  |   | X |
| Western Cape | 01 - ZWC | Department of Home Affairs (South Africa), Statistics South Africa. South Africa Mortality and Causes of Death 1997-2005. Pretoria, South Africa: Statistics South Africa.                                                                                                                                                |  |   | X |
| Zambia       | 01 - ZMB | Mudenda SS, Kamocha S, Mswia R, Conkling M, Sikanyiti P, Potter D, Mayaka WC, Marx MA. Feasibility of using a WHO-standard methodology for Sample Vital Registration with Verbal Autopsy (SAVVY) to report leading causes of death in Zambia: results of a pilot in four provinces, 2010. Popul Health Metr. 2011; 9: 40. |  | X |   |
| Zambia       | 02 - ZMB | Turnbull E, Lembalemba MK, Brad Guffey M, Bolton-Moore C, Mubiana-Mbewe M, Chintu N, Giganti MJ, Nalubamba-Phiri M, Stringer EM, Stringer JS. Causes of stillbirth, neonatal death and early childhood death in rural Zambia by verbal autopsy assessments. Trop Med Int Health. 2011; 16(7): 894-901.                    |  | X |   |
| Zimbabwe     | 01 - ZWE | Registrar General's Department (Zimbabwe), Zimbabwe National Statistics Agency. Zimbabwe Mortality Report 2007.                                                                                                                                                                                                           |  |   | X |
| Zimbabwe     | 02 - ZWE | World Health Organization (WHO). WHO Mortality Database Version February 2014. Geneva, Switzerland: World Health Organization (WHO), 2014.                                                                                                                                                                                |  |   | X |

**Appendix Table 13: Covariates used in CODEm for malaria - Males and Females**

| Covariate                                        | Direction | Level |
|--------------------------------------------------|-----------|-------|
| Health System Access                             | -1        | 1     |
| ITN Coverage (proportion)                        | -1        | 1     |
| Malaria Endemicity (40-100%) from MAP 2010       | 1         | 1     |
| Malaria Endemicity (5-100%) from MAP 2010        | 1         | 1     |
| Malaria Indoor Residual Spraying Coverage        | -1        | 1     |
| Malaria Lysenko PfPR (Hyperendemic-Holoendemic)  | 1         | 1     |
| Malaria Lysenko PfPR (Mesoendemic-Holoendemic)   | 1         | 1     |
| Malaria PfPR from MAP2010                        | 1         | 1     |
| Malaria Population-At-Risk (proportion) from WHO | 1         | 1     |
| Malaria Prevalence-Weighted Resistance           | 1         | 1     |
| Rainfall (Quintiles 2-5)                         | 1         | 1     |
| Rainfall (Quintiles 3-5)                         | 1         | 1     |
| Rainfall (Quintiles 4-5)                         | 1         | 1     |
| Interaction of ITN coverage with log(Pfpr)       | 0         | 1     |
| Education by Age                                 | -1        | 3     |
| LDI (I\$ per capita)                             | -1        | 3     |

**Appendix Table 14a: CODEm sub-model performance - Malaria Africa under 5 Males**

| Overall Rank | Model type | Dependent variable | Covariates                                                                                                                                                                 | Root Mean Squared Error |      | Trend Test |      | Draws |
|--------------|------------|--------------------|----------------------------------------------------------------------------------------------------------------------------------------------------------------------------|-------------------------|------|------------|------|-------|
|              |            |                    |                                                                                                                                                                            | Test 1                  | Rank | Test 1     | Rank |       |
| 1            | spacetime  | Logit(CF)          | Interaction of malaria ITN and log PFPR covariates, Malaria Prevalence-Weighted Resistance, Malaria Lysenko PFPR (2 Highest Endemicity)                                    | 0.4208                  | 3    | 0.2589     | 2    | 130   |
| 2            | spacetime  | Logit(CF)          | Interaction of malaria ITN and log PFPR covariates, Malaria Prevalence-Weighted Resistance, Malaria Lysenko PFPR (2 Highest Endemicity), Log LDI                           | 0.4273                  | 7    | 0.2582     | 1    | 113   |
| 3            | spacetime  | Logit(CF)          | Interaction of malaria ITN and log PFPR covariates, Malaria Prevalence-Weighted Resistance                                                                                 | 0.4267                  | 6    | 0.2591     | 3    | 99    |
| 4            | spacetime  | Logit(CF)          | Interaction of malaria ITN and log PFPR covariates, Malaria Prevalence-Weighted Resistance, Malaria Lysenko PFPR (2 Highest Endemicity), Rainfall (Quintiles 2-5)          | 0.4356                  | 20   | 0.2623     | 4    | 86    |
| 5            | spacetime  | Logit(CF)          | Malaria Prevalence-Weighted Resistance, Malaria Lysenko PFPR (2 Highest Endemicity)                                                                                        | 0.4180                  | 2    | 0.2688     | 31   | 75    |
| 6            | spacetime  | Logit(CF)          | Malaria Prevalence-Weighted Resistance                                                                                                                                     | 0.4146                  | 1    | 0.2689     | 32   | 65    |
| 7            | spacetime  | Ln(Rate)           | Interaction of malaria ITN and log PFPR covariates, Malaria Prevalence-Weighted Resistance                                                                                 | 0.4447                  | 31   | 0.2634     | 9    | 56    |
| 8            | spacetime  | Ln(Rate)           | Interaction of malaria ITN and log PFPR covariates, Malaria Prevalence-Weighted Resistance, Malaria Lysenko PFPR (2 Highest Endemicity)                                    | 0.4447                  | 32   | 0.2634     | 8    | 49    |
| 9            | spacetime  | Ln(Rate)           | Interaction of malaria ITN and log PFPR covariates, Malaria Prevalence-Weighted Resistance, Log LDI                                                                        | 0.4512                  | 37   | 0.2627     | 5    | 43    |
| 10           | spacetime  | Ln(Rate)           | Malaria Prevalence-Weighted Resistance, Log LDI                                                                                                                            | 0.4313                  | 11   | 0.2692     | 33   | 37    |
| 11           | spacetime  | Ln(Rate)           | Interaction of malaria ITN and log PFPR covariates, Malaria Prevalence-Weighted Resistance, Malaria Endemicity (5-100%)                                                    | 0.4507                  | 36   | 0.2644     | 11   | 32    |
| 12           | spacetime  | Ln(Rate)           | Interaction of malaria ITN and log PFPR covariates, Malaria Prevalence-Weighted Resistance, Malaria Lysenko PFPR (2 Highest Endemicity), Education (years per capita)      | 0.4536                  | 40   | 0.2630     | 7    | 28    |
| 13           | spacetime  | Logit(CF)          | Interaction of malaria ITN and log PFPR covariates, Malaria Prevalence-Weighted Resistance, Rainfall (Quintiles 2-5)                                                       | 0.4382                  | 23   | 0.2671     | 24   | 24    |
| 14           | spacetime  | Ln(Rate)           | Malaria Prevalence-Weighted Resistance                                                                                                                                     | 0.4348                  | 18   | 0.2695     | 36   | 21    |
| 15           | spacetime  | Ln(Rate)           | Interaction of malaria ITN and log PFPR covariates, Malaria Prevalence-Weighted Resistance, Malaria Lysenko PFPR (2 Highest Endemicity), Log LDI                           | 0.4556                  | 42   | 0.2647     | 12   | 18    |
| 16           | spacetime  | Logit(CF)          | Interaction of malaria ITN and log PFPR covariates, Malaria Prevalence-Weighted Resistance, Malaria Lysenko PFPR (2 Highest Endemicity), Rainfall (Quintiles 2-5), Log LDI | 0.4545                  | 41   | 0.2649     | 14   | 16    |
| 17           | spacetime  | Ln(Rate)           | Interaction of malaria ITN and log PFPR covariates, Malaria Prevalence-Weighted Resistance, Education (years per capita)                                                   | 0.4531                  | 39   | 0.2651     | 17   | 14    |
| 18           | spacetime  | Ln(Rate)           | Malaria Prevalence-Weighted Resistance, Malaria Lysenko PFPR (2 Highest Endemicity), Log LDI                                                                               | 0.4401                  | 24   | 0.2693     | 34   | 12    |
| 19           | spacetime  | Ln(Rate)           | Malaria Prevalence-Weighted Resistance, Education (years per capita)                                                                                                       | 0.4345                  | 16   | 0.2713     | 43   | 11    |
| 20           | spacetime  | Ln(Rate)           | Interaction of malaria ITN and log PFPR covariates, Malaria Prevalence-Weighted Resistance, Malaria Population-At-Risk (proportion)                                        | 0.4681                  | 54   | 0.2641     | 10   | 9     |
| 21           | spacetime  | Ln(Rate)           | Malaria Prevalence-Weighted Resistance, Malaria Lysenko PFPR (2 Highest Endemicity)                                                                                        | 0.4409                  | 26   | 0.2703     | 39   | 8     |



|    |           |           |                                                                                                                                                                                           |        |    |        |    |   |
|----|-----------|-----------|-------------------------------------------------------------------------------------------------------------------------------------------------------------------------------------------|--------|----|--------|----|---|
| 22 | spacetime | Ln(Rate)  | Interaction of malaria ITN and log PFPR covariates, Malaria Prevalence-Weighted Resistance, Malaria Endemicity (5-100%), Log LDI                                                          | 0.4526 | 38 | 0.2678 | 28 | 7 |
| 23 | spacetime | Ln(Rate)  | Malaria Prevalence-Weighted Resistance, Malaria Lysenko PFPR (2 Highest Endemicity), Education (years per capita)                                                                         | 0.4486 | 33 | 0.2699 | 37 | 6 |
| 24 | spacetime | Ln(Rate)  | Interaction of malaria ITN and log PFPR covariates, Malaria Prevalence-Weighted Resistance, Malaria Population-At-Risk (proportion), Log LDI                                              | 0.4649 | 50 | 0.2672 | 26 | 5 |
| 25 | spacetime | Ln(Rate)  | Interaction of malaria ITN and log PFPR covariates, Malaria Prevalence-Weighted Resistance, Malaria Endemicity (5-100%), Malaria Lysenko PFPR (2 Highest Endemicity)                      | 0.4598 | 44 | 0.2695 | 35 | 5 |
| 26 | spacetime | Ln(Rate)  | Malaria Prevalence-Weighted Resistance, Rainfall (Quintiles 2-5), Log LDI                                                                                                                 | 0.4330 | 13 | 0.2776 | 67 | 4 |
| 27 | spacetime | Logit(CF) | Malaria Prevalence-Weighted Resistance, Rainfall (Quintiles 2-5)                                                                                                                          | 0.4213 | 4  | 0.2798 | 80 | 3 |
| 28 | spacetime | Ln(Rate)  | Interaction of malaria ITN and log PFPR covariates, Malaria Prevalence-Weighted Resistance, Rainfall (Quintiles 2-5)                                                                      | 0.4682 | 55 | 0.2684 | 30 | 3 |
| 29 | spacetime | Ln(Rate)  | Interaction of malaria ITN and log PFPR covariates, Malaria Prevalence-Weighted Resistance, Malaria Lysenko PFPR (2 Highest Endemicity), Rainfall (Quintiles 2-5)                         | 0.4568 | 43 | 0.2701 | 38 | 3 |
| 30 | spacetime | Logit(CF) | Malaria Prevalence-Weighted Resistance, Malaria Lysenko PFPR (2 Highest Endemicity), Rainfall (Quintiles 2-5)                                                                             | 0.4227 | 5  | 0.2799 | 83 | 2 |
| 31 | spacetime | Ln(Rate)  | Malaria Prevalence-Weighted Resistance, Rainfall (Quintiles 2-5), Education (years per capita)                                                                                            | 0.4361 | 21 | 0.2776 | 66 | 2 |
| 32 | spacetime | Ln(Rate)  | Interaction of malaria ITN and log PFPR covariates, Malaria Prevalence-Weighted Resistance, Malaria Lysenko PFPR (2 Highest Endemicity), Malaria Population-At-Risk (proportion)          | 0.4695 | 59 | 0.2683 | 29 | 2 |
| 33 | spacetime | Ln(Rate)  | Malaria Population-At-Risk (proportion)                                                                                                                                                   | 0.4292 | 9  | 0.2822 | 91 | 1 |
| 34 | spacetime | Ln(Rate)  | Malaria Lysenko PFPR (2 Highest Endemicity)                                                                                                                                               | 0.4297 | 10 | 0.2824 | 92 | 1 |
| 35 | spacetime | Ln(Rate)  | Malaria Prevalence-Weighted Resistance, Rainfall (Quintiles 2-5)                                                                                                                          | 0.4345 | 17 | 0.2785 | 74 | 1 |
| 36 | spacetime | Ln(Rate)  | Malaria Prevalence-Weighted Resistance, Malaria Lysenko PFPR (2 Highest Endemicity), Rainfall (Quintiles 2-5)                                                                             | 0.4424 | 27 | 0.2796 | 79 | 1 |
| 37 | spacetime | Ln(Rate)  | Malaria Prevalence-Weighted Resistance, Malaria Lysenko PFPR (2 Highest Endemicity), Rainfall (Quintiles 2-5), Education (years per capita)                                               | 0.4487 | 34 | 0.2767 | 61 | 1 |
| 38 | spacetime | Ln(Rate)  | Interaction of malaria ITN and log PFPR covariates, Malaria Prevalence-Weighted Resistance, Rainfall (Quintiles 2-5), Education (years per capita)                                        | 0.4688 | 57 | 0.2703 | 40 | 1 |
| 39 | spacetime | Ln(Rate)  | Interaction of malaria ITN and log PFPR covariates, Malaria Prevalence-Weighted Resistance, Malaria Lysenko PFPR (2 Highest Endemicity), Malaria Population-At-Risk (proportion), Log LDI | 0.4869 | 76 | 0.2650 | 15 | 1 |
| 40 | spacetime | Ln(Rate)  | Interaction of malaria ITN and log PFPR covariates, Malaria Prevalence-Weighted Resistance, Malaria Endemicity (5-100%), Malaria Lysenko PFPR (2 Highest Endemicity), Log LDI             | 0.4811 | 72 | 0.2666 | 22 | 1 |

**Appendix Table 14b: CODEm sub-model performance - Malaria Africa under 5 Females**

| Overall Rank | Model type | Dependent variable | Covariates                                                                                                                                                            | Root Mean Squared Error |      | Trend Test |      | Draws |
|--------------|------------|--------------------|-----------------------------------------------------------------------------------------------------------------------------------------------------------------------|-------------------------|------|------------|------|-------|
|              |            |                    |                                                                                                                                                                       | Test 1                  | Rank | Test 1     | Rank |       |
| 1            | spacetime  | Logit(CF)          | Malaria Prevalence-Weighted Resistance                                                                                                                                | 0.4319                  | 1    | 0.2823     | 16   | 130   |
| 2            | spacetime  | Logit(CF)          | Malaria Prevalence-Weighted Resistance, Malaria Lysenko PFPR (2 Highest Endemicity)                                                                                   | 0.4542                  | 6    | 0.2822     | 15   | 113   |
| 3            | spacetime  | Logit(CF)          | Interaction of malaria ITN and log PFPR covariates, Malaria Prevalence-Weighted Resistance                                                                            | 0.4586                  | 11   | 0.2810     | 12   | 99    |
| 4            | spacetime  | Ln(Rate)           | Malaria Prevalence-Weighted Resistance, Education (years per capita)                                                                                                  | 0.4477                  | 4    | 0.2840     | 25   | 86    |
| 5            | spacetime  | Logit(CF)          | Interaction of malaria ITN and log PFPR covariates, Malaria Prevalence-Weighted Resistance, Malaria Lysenko PFPR (2 Highest Endemicity)                               | 0.4656                  | 16   | 0.2819     | 13   | 75    |
| 6            | spacetime  | Ln(Rate)           | Malaria Prevalence-Weighted Resistance, Log LDI                                                                                                                       | 0.4502                  | 5    | 0.2858     | 31   | 65    |
| 7            | spacetime  | Ln(Rate)           | Malaria Prevalence-Weighted Resistance                                                                                                                                | 0.4450                  | 3    | 0.2863     | 35   | 56    |
| 8            | spacetime  | Ln(Rate)           | Malaria Prevalence-Weighted Resistance, Malaria Lysenko PFPR (2 Highest Endemicity)                                                                                   | 0.4584                  | 10   | 0.2855     | 29   | 49    |
| 9            | spacetime  | Ln(Rate)           | Malaria Prevalence-Weighted Resistance, Malaria Lysenko PFPR (2 Highest Endemicity), Log LDI                                                                          | 0.4637                  | 15   | 0.2849     | 28   | 43    |
| 10           | spacetime  | Ln(Rate)           | ITN Coverage (proportion)                                                                                                                                             | 0.4657                  | 17   | 0.2846     | 27   | 37    |
| 11           | spacetime  | Logit(CF)          | Interaction of malaria ITN and log PFPR covariates, Malaria Prevalence-Weighted Resistance, Malaria Lysenko PFPR (2 Highest Endemicity), Log LDI                      | 0.4813                  | 38   | 0.2802     | 8    | 32    |
| 12           | spacetime  | Ln(Rate)           | Malaria Prevalence-Weighted Resistance, Malaria Lysenko PFPR (2 Highest Endemicity), Education (years per capita)                                                     | 0.4715                  | 29   | 0.2830     | 21   | 28    |
| 13           | spacetime  | Ln(Rate)           | Interaction of malaria ITN and log PFPR covariates, Malaria Prevalence-Weighted Resistance, Log LDI                                                                   | 0.4939                  | 50   | 0.2765     | 2    | 24    |
| 14           | spacetime  | Logit(CF)          | Malaria Lysenko PFPR (2 Highest Endemicity)                                                                                                                           | 0.4556                  | 8    | 0.2888     | 45   | 21    |
| 15           | spacetime  | Ln(Rate)           | Malaria Population-At-Risk (proportion), Log LDI                                                                                                                      | 0.4759                  | 31   | 0.2839     | 24   | 18    |
| 16           | spacetime  | Ln(Rate)           | Interaction of malaria ITN and log PFPR covariates, Malaria Prevalence-Weighted Resistance                                                                            | 0.4966                  | 54   | 0.2760     | 1    | 16    |
| 17           | spacetime  | Ln(Rate)           | Interaction of malaria ITN and log PFPR covariates, Malaria Prevalence-Weighted Resistance, Education (years per capita)                                              | 0.4957                  | 53   | 0.2777     | 3    | 14    |
| 18           | spacetime  | Ln(Rate)           | Interaction of malaria ITN and log PFPR covariates, Malaria Prevalence-Weighted Resistance, Malaria Endemicity (5-100%), Log LDI                                      | 0.4934                  | 49   | 0.2810     | 11   | 12    |
| 19           | spacetime  | Ln(Rate)           | Malaria Lysenko PFPR (2 Highest Endemicity), Education (years per capita)                                                                                             | 0.4696                  | 25   | 0.2865     | 36   | 11    |
| 20           | spacetime  | Ln(Rate)           | Malaria Endemicity (5-100%)                                                                                                                                           | 0.4708                  | 26   | 0.2872     | 37   | 9     |
| 21           | spacetime  | Ln(Rate)           | Malaria Lysenko PFPR (2 Highest Endemicity)                                                                                                                           | 0.4658                  | 18   | 0.2888     | 46   | 8     |
| 22           | spacetime  | Ln(Rate)           | Malaria Population-At-Risk (proportion)                                                                                                                               | 0.4712                  | 27   | 0.2872     | 38   | 7     |
| 23           | spacetime  | Ln(Rate)           | Interaction of malaria ITN and log PFPR covariates, Malaria Prevalence-Weighted Resistance, Malaria Population-At-Risk (proportion), Log LDI                          | 0.5013                  | 59   | 0.2804     | 9    | 6     |
| 24           | spacetime  | Ln(Rate)           | Interaction of malaria ITN and log PFPR covariates, Malaria Prevalence-Weighted Resistance, Malaria Lysenko PFPR (2 Highest Endemicity)                               | 0.5078                  | 67   | 0.2781     | 4    | 5     |
| 25           | spacetime  | Ln(Rate)           | Interaction of malaria ITN and log PFPR covariates, Malaria Prevalence-Weighted Resistance, Malaria Endemicity (5-100%)                                               | 0.4954                  | 52   | 0.2825     | 18   | 5     |
| 26           | spacetime  | Ln(Rate)           | Interaction of malaria ITN and log PFPR covariates, Malaria Prevalence-Weighted Resistance, Malaria Lysenko PFPR (2 Highest Endemicity), Education (years per capita) | 0.5074                  | 66   | 0.2795     | 7    | 4     |
| 27           | spacetime  | Logit(CF)          | Interaction of malaria ITN and log PFPR covariates                                                                                                                    | 0.4689                  | 23   | 0.2906     | 57   | 3     |
| 28           | spacetime  | Logit(CF)          | Interaction of malaria ITN and log PFPR covariates, Log LDI                                                                                                           | 0.4731                  | 30   | 0.2896     | 51   | 3     |

|    |           |           |                                                                                                                                                                                           |        |    |        |    |   |
|----|-----------|-----------|-------------------------------------------------------------------------------------------------------------------------------------------------------------------------------------------|--------|----|--------|----|---|
| 29 | spacetime | Ln(Rate)  | Interaction of malaria ITN and log PFPR covariates, Malaria Prevalence-Weighted Resistance, Malaria Population-At-Risk (proportion)                                                       | 0.4953 | 51 | 0.2857 | 30 | 3 |
| 30 | spacetime | Logit(CF) | Malaria Lysenko PFPR (2 Highest Endemicity), Log LDI                                                                                                                                      | 0.4765 | 33 | 0.2903 | 55 | 2 |
| 31 | spacetime | Ln(Rate)  | Malaria Lysenko PFPR (2 Highest Endemicity), Log LDI                                                                                                                                      | 0.4912 | 47 | 0.2886 | 43 | 2 |
| 32 | spacetime | Ln(Rate)  | Interaction of malaria ITN and log PFPR covariates, Malaria Prevalence-Weighted Resistance, Malaria Population-At-Risk (proportion), Education (years per capita)                         | 0.5021 | 60 | 0.2838 | 23 | 2 |
| 33 | spacetime | Logit(CF) | Interaction of malaria ITN and log PFPR covariates, Malaria Lysenko PFPR (2 Highest Endemicity)                                                                                           | 0.4892 | 44 | 0.2902 | 54 | 1 |
| 34 | spacetime | Ln(Rate)  | Interaction of malaria ITN and log PFPR covariates, Malaria Endemicity (5-100%), Log LDI                                                                                                  | 0.4996 | 58 | 0.2892 | 47 | 1 |
| 35 | spacetime | Ln(Rate)  | Interaction of malaria ITN and log PFPR covariates, Malaria Prevalence-Weighted Resistance, Malaria Lysenko PFPR (2 Highest Endemicity), Log LDI                                          | 0.5301 | 94 | 0.2784 | 5  | 1 |
| 36 | spacetime | Ln(Rate)  | Interaction of malaria ITN and log PFPR covariates, Malaria Prevalence-Weighted Resistance, Malaria Lysenko PFPR (2 Highest Endemicity), Malaria Population-At-Risk (proportion)          | 0.5216 | 81 | 0.2860 | 33 | 1 |
| 37 | spacetime | Ln(Rate)  | Interaction of malaria ITN and log PFPR covariates, Malaria Prevalence-Weighted Resistance, Malaria Lysenko PFPR (2 Highest Endemicity), Malaria Population-At-Risk (proportion), Log LDI | 0.5231 | 84 | 0.2836 | 22 | 1 |
| 38 | spacetime | Ln(Rate)  | Interaction of malaria ITN and log PFPR covariates, Malaria Prevalence-Weighted Resistance, Malaria Endemicity (5-100%), Malaria Lysenko PFPR (2 Highest Endemicity)                      | 0.5128 | 74 | 0.2843 | 26 | 1 |
| 39 | spacetime | Ln(Rate)  | Interaction of malaria ITN and log PFPR covariates, Malaria Prevalence-Weighted Resistance, Malaria Endemicity (5-100%), Malaria Lysenko PFPR (2 Highest Endemicity), Log LDI             | 0.5188 | 79 | 0.2822 | 14 | 1 |
| 40 | spacetime | Ln(Rate)  | Interaction of malaria ITN and log PFPR covariates, log(malaria PfPR)                                                                                                                     | 0.5280 | 91 | 0.2825 | 17 | 1 |

**Appendix Table 14c: CODEm sub-model performance - Malaria Africa over 5 Males**

| Overall Rank | Model type | Dependent variable | Covariates                                                                                                         | Root Mean Squared Error |      | Trend Test |      | Draws |
|--------------|------------|--------------------|--------------------------------------------------------------------------------------------------------------------|-------------------------|------|------------|------|-------|
|              |            |                    |                                                                                                                    | Test 1                  | Rank | Test 1     | Rank |       |
| 1            | spacetime  | Logit(CF)          | ITN Coverage (proportion), log(malaria PfPR)                                                                       | 0.5218                  | 4    | 0.2403     | 1    | 123   |
| 2            | spacetime  | Ln(Rate)           | ITN Coverage (proportion), log(malaria PfPR), Malaria Endemicity (40-100%)                                         | 0.5197                  | 3    | 0.2548     | 4    | 108   |
| 3            | spacetime  | Logit(CF)          | ITN Coverage (proportion), Interaction of malaria ITN and log PFPR covariates                                      | 0.5177                  | 2    | 0.2558     | 5    | 94    |
| 4            | spacetime  | Logit(CF)          | ITN Coverage (proportion), log(malaria PfPR), Malaria Endemicity (40-100%)                                         | 0.5285                  | 8    | 0.2521     | 3    | 83    |
| 5            | spacetime  | Logit(CF)          | Interaction of malaria ITN and log PFPR covariates, log(malaria PfPR), Malaria Endemicity (40-100%)                | 0.5134                  | 1    | 0.2703     | 11   | 73    |
| 6            | spacetime  | Logit(CF)          | Interaction of malaria ITN and log PFPR covariates, log(malaria PfPR)                                              | 0.5250                  | 5    | 0.2648     | 7    | 64    |
| 7            | spacetime  | Ln(Rate)           | ITN Coverage (proportion), log(malaria PfPR)                                                                       | 0.5292                  | 10   | 0.2504     | 2    | 56    |
| 8            | spacetime  | Ln(Rate)           | ITN Coverage (proportion), Interaction of malaria ITN and log PFPR covariates, Malaria Endemicity (40-100%)        | 0.5282                  | 7    | 0.2655     | 8    | 49    |
| 9            | spacetime  | Logit(CF)          | ITN Coverage (proportion), Interaction of malaria ITN and log PFPR covariates, Malaria Endemicity (40-100%)        | 0.5260                  | 6    | 0.2656     | 9    | 43    |
| 10           | spacetime  | Ln(Rate)           | ITN Coverage (proportion), Interaction of malaria ITN and log PFPR covariates                                      | 0.5414                  | 15   | 0.2571     | 6    | 38    |
| 11           | spacetime  | Ln(Rate)           | Interaction of malaria ITN and log PFPR covariates, log(malaria PfPR), Malaria Endemicity (40-100%)                | 0.5359                  | 12   | 0.2767     | 15   | 33    |
| 12           | spacetime  | Logit(CF)          | ITN Coverage (proportion), Malaria Prevalence-Weighted Resistance                                                  | 0.5406                  | 14   | 0.2743     | 14   | 29    |
| 13           | spacetime  | Logit(CF)          | ITN Coverage (proportion)                                                                                          | 0.5451                  | 17   | 0.2715     | 12   | 25    |
| 14           | spacetime  | Logit(CF)          | ITN Coverage (proportion), Malaria Endemicity (40-100%)                                                            | 0.5367                  | 13   | 0.2775     | 17   | 22    |
| 15           | spacetime  | Ln(Rate)           | Interaction of malaria ITN and log PFPR covariates, log(malaria PfPR)                                              | 0.5424                  | 16   | 0.2773     | 16   | 20    |
| 16           | spacetime  | Logit(CF)          | ITN Coverage (proportion), Malaria Lysenko PFPR (3 Highest Endemicity)                                             | 0.5624                  | 25   | 0.2687     | 10   | 17    |
| 17           | spacetime  | Logit(CF)          | Interaction of malaria ITN and log PFPR covariates, log(malaria PfPR), Education (years per capita)                | 0.5292                  | 9    | 0.2836     | 34   | 15    |
| 18           | spacetime  | Ln(Rate)           | Interaction of malaria ITN and log PFPR covariates, log(malaria PfPR), Education (years per capita)                | 0.5668                  | 29   | 0.2786     | 19   | 13    |
| 19           | spacetime  | Logit(CF)          | ITN Coverage (proportion), Malaria Population-At-Risk (proportion)                                                 | 0.5565                  | 20   | 0.2863     | 39   | 12    |
| 20           | spacetime  | Logit(CF)          | ITN Coverage (proportion), Malaria Endemicity (5-100%)                                                             | 0.5578                  | 22   | 0.2845     | 38   | 10    |
| 21           | spacetime  | Logit(CF)          | log(malaria PfPR), Malaria Lysenko PFPR (2 Highest Endemicity), Education (years per capita)                       | 0.5562                  | 18   | 0.2958     | 47   | 9     |
| 22           | spacetime  | Logit(CF)          | log(malaria PfPR)                                                                                                  | 0.5667                  | 28   | 0.3008     | 55   | 8     |
| 23           | spacetime  | Logit(CF)          | Health System Access (capped), ITN Coverage (proportion), log(malaria PfPR)                                        | 0.5723                  | 35   | 0.2966     | 49   | 7     |
| 24           | spacetime  | Logit(CF)          | log(malaria PfPR), Malaria Lysenko PFPR (2 Highest Endemicity)                                                     | 0.5701                  | 33   | 0.2990     | 52   | 6     |
| 25           | spacetime  | Logit(CF)          | log(malaria PfPR), Malaria Prevalence-Weighted Resistance                                                          | 0.5357                  | 11   | 0.3058     | 77   | 5     |
| 26           | spacetime  | Ln(Rate)           | ITN Coverage (proportion), Malaria Endemicity (40-100%)                                                            | 0.5757                  | 41   | 0.2977     | 50   | 5     |
| 27           | spacetime  | Logit(CF)          | log(malaria PfPR), Education (years per capita)                                                                    | 0.5824                  | 50   | 0.2966     | 48   | 4     |
| 28           | spacetime  | Ln(Rate)           | ITN Coverage (proportion), Malaria Lysenko PFPR (3 Highest Endemicity)                                             | 0.5972                  | 73   | 0.2786     | 20   | 4     |
| 29           | spacetime  | Logit(CF)          | log(malaria PfPR), Malaria Prevalence-Weighted Resistance, Education (years per capita)                            | 0.5748                  | 39   | 0.3028     | 62   | 3     |
| 30           | spacetime  | Logit(CF)          | Interaction of malaria ITN and log PFPR covariates, log(malaria PfPR), Malaria Lysenko PFPR (3 Highest Endemicity) | 0.5621                  | 23   | 0.3062     | 80   | 3     |

|    |           |           |                                                                                                                             |        |     |        |     |   |
|----|-----------|-----------|-----------------------------------------------------------------------------------------------------------------------------|--------|-----|--------|-----|---|
| 31 | spacetime | Logit(CF) | ITN Coverage (proportion), Malaria Endemicity (40-100%), Malaria Population-At-Risk (proportion)                            | 0.5650 | 26  | 0.3067 | 86  | 2 |
| 32 | spacetime | Logit(CF) | Health System Access (capped), log(malaria PfPR), Malaria Prevalence-Weighted Resistance                                    | 0.5684 | 30  | 0.3053 | 75  | 2 |
| 33 | spacetime | Logit(CF) | Health System Access (capped), Interaction of malaria ITN and log PFPR covariates, log(malaria PfPR)                        | 0.5692 | 32  | 0.3050 | 74  | 2 |
| 34 | spacetime | Ln(Rate)  | ITN Coverage (proportion)                                                                                                   | 0.5754 | 40  | 0.3035 | 66  | 2 |
| 35 | spacetime | Logit(CF) | log(malaria PfPR), Malaria Lysenko PFPR (2 Highest Endemicity), Log LDI                                                     | 0.5878 | 59  | 0.3022 | 60  | 1 |
| 36 | spacetime | Logit(CF) | Interaction of malaria ITN and log PFPR covariates, log(malaria PfPR), Malaria Lysenko PFPR (2 Highest Endemicity), Log LDI | 0.6203 | 120 | 0.2728 | 13  | 1 |
| 37 | spacetime | Logit(CF) | Health System Access (capped), log(malaria PfPR), Malaria Lysenko PFPR (2 Highest Endemicity)                               | 0.5993 | 78  | 0.3020 | 59  | 1 |
| 38 | spacetime | Ln(Rate)  | log(malaria PfPR), Malaria Lysenko PFPR (2 Highest Endemicity), Education (years per capita)                                | 0.5878 | 58  | 0.3010 | 57  | 1 |
| 39 | spacetime | Ln(Rate)  | log(malaria PfPR), Malaria Prevalence-Weighted Resistance                                                                   | 0.5623 | 24  | 0.3099 | 104 | 1 |
| 40 | spacetime | Ln(Rate)  | ITN Coverage (proportion), Malaria Population-At-Risk (proportion)                                                          | 0.5565 | 19  | 0.3109 | 111 | 1 |
| 41 | spacetime | Ln(Rate)  | ITN Coverage (proportion), Malaria Prevalence-Weighted Resistance                                                           | 0.5685 | 31  | 0.3070 | 89  | 1 |
| 42 | spacetime | Ln(Rate)  | ITN Coverage (proportion), Malaria Prevalence-Weighted Resistance, Malaria Endemicity (40-100%)                             | 0.5846 | 53  | 0.3047 | 73  | 1 |
| 43 | spacetime | Ln(Rate)  | Health System Access (capped), ITN Coverage (proportion), log(malaria PfPR)                                                 | 0.5954 | 72  | 0.2993 | 53  | 1 |

**Appendix Table 14d: CODEm sub-model performance - Malaria Africa over 5 Females**

| Overall Rank | Model type | Dependent variable | Covariates                                                                                                                                                                                    | Root Mean Squared Error |      | Trend Test |      | Draws |
|--------------|------------|--------------------|-----------------------------------------------------------------------------------------------------------------------------------------------------------------------------------------------|-------------------------|------|------------|------|-------|
|              |            |                    |                                                                                                                                                                                               | Test 1                  | Rank | Test 1     | Rank |       |
| 1            | spacetime  | Logit(CF)          | Interaction of malaria ITN and log PFPR covariates, log(malaria PfPR), Malaria Lysenko PFPR (3 Highest Endemicity)                                                                            | 0.7138                  | 1    | 0.3290     | 6    | 160   |
| 2            | spacetime  | Ln(Rate)           | Interaction of malaria ITN and log PFPR covariates, log(malaria PfPR), Malaria Lysenko PFPR (3 Highest Endemicity)                                                                            | 0.7380                  | 6    | 0.3304     | 8    | 134   |
| 3            | spacetime  | Logit(CF)          | Interaction of malaria ITN and log PFPR covariates, log(malaria PfPR), Malaria Lysenko PFPR (2 Highest Endemicity), Malaria Lysenko PFPR (3 Highest Endemicity)                               | 0.7497                  | 16   | 0.3289     | 4    | 113   |
| 4            | spacetime  | Logit(CF)          | Interaction of malaria ITN and log PFPR covariates, log(malaria PfPR), Malaria Endemicity (40-100%), Malaria Lysenko PFPR (2 Highest Endemicity)                                              | 0.7541                  | 21   | 0.3289     | 5    | 95    |
| 5            | spacetime  | Logit(CF)          | Interaction of malaria ITN and log PFPR covariates, Malaria Prevalence-Weighted Resistance                                                                                                    | 0.7327                  | 2    | 0.3518     | 28   | 80    |
| 6            | spacetime  | Logit(CF)          | log(malaria PfPR), Malaria Prevalence-Weighted Resistance                                                                                                                                     | 0.7394                  | 7    | 0.3491     | 23   | 67    |
| 7            | spacetime  | Logit(CF)          | Health System Access (capped), Interaction of malaria ITN and log PFPR covariates, log(malaria PfPR), Malaria Lysenko PFPR (3 Highest Endemicity)                                             | 0.7583                  | 31   | 0.3254     | 1    | 56    |
| 8            | spacetime  | Logit(CF)          | Interaction of malaria ITN and log PFPR covariates, log(malaria PfPR), Malaria Lysenko PFPR (2 Highest Endemicity)                                                                            | 0.7552                  | 25   | 0.3348     | 10   | 47    |
| 9            | spacetime  | Logit(CF)          | ITN Coverage (proportion), Interaction of malaria ITN and log PFPR covariates, Malaria Lysenko PFPR (3 Highest Endemicity)                                                                    | 0.7543                  | 23   | 0.3442     | 17   | 40    |
| 10           | spacetime  | Logit(CF)          | log(malaria PfPR)                                                                                                                                                                             | 0.7429                  | 11   | 0.3524     | 31   | 33    |
| 11           | spacetime  | Ln(Rate)           | Interaction of malaria ITN and log PFPR covariates, log(malaria PfPR), Malaria Lysenko PFPR (2 Highest Endemicity), Malaria Lysenko PFPR (3 Highest Endemicity), Education (years per capita) | 0.7639                  | 39   | 0.3281     | 3    | 28    |
| 12           | spacetime  | Logit(CF)          | Interaction of malaria ITN and log PFPR covariates, Malaria Prevalence-Weighted Resistance, Malaria Endemicity (40-100%)                                                                      | 0.7327                  | 3    | 0.3552     | 39   | 24    |
| 13           | spacetime  | Ln(Rate)           | Interaction of malaria ITN and log PFPR covariates, log(malaria PfPR), Malaria Lysenko PFPR (2 Highest Endemicity), Malaria Lysenko PFPR (3 Highest Endemicity)                               | 0.7640                  | 41   | 0.3269     | 2    | 20    |
| 14           | spacetime  | Logit(CF)          | log(malaria PfPR), Malaria Lysenko PFPR (2 Highest Endemicity), Education (years per capita)                                                                                                  | 0.7579                  | 30   | 0.3431     | 16   | 17    |
| 15           | spacetime  | Logit(CF)          | log(malaria PfPR), Malaria Endemicity (40-100%), Malaria Lysenko PFPR (2 Highest Endemicity)                                                                                                  | 0.7366                  | 5    | 0.3572     | 42   | 14    |
| 16           | spacetime  | Logit(CF)          | Interaction of malaria ITN and log PFPR covariates, log(malaria PfPR)                                                                                                                         | 0.7541                  | 22   | 0.3512     | 27   | 12    |
| 17           | spacetime  | Ln(Rate)           | Health System Access (capped), Interaction of malaria ITN and log PFPR covariates, log(malaria PfPR), Malaria Prevalence-Weighted Resistance, Malaria Lysenko PFPR (3 Highest Endemicity)     | 0.7693                  | 55   | 0.3317     | 9    | 10    |
| 18           | spacetime  | Ln(Rate)           | Health System Access (capped), Interaction of malaria ITN and log PFPR covariates, log(malaria PfPR), Malaria Lysenko PFPR (3 Highest Endemicity)                                             | 0.7705                  | 58   | 0.3294     | 7    | 8     |
| 19           | spacetime  | Logit(CF)          | ITN Coverage (proportion), Interaction of malaria ITN and log PFPR covariates, Malaria Prevalence-Weighted Resistance                                                                         | 0.7653                  | 44   | 0.3478     | 22   | 7     |
| 20           | spacetime  | Ln(Rate)           | ITN Coverage (proportion), Interaction of malaria ITN and log PFPR covariates, Malaria Lysenko PFPR (3 Highest Endemicity)                                                                    | 0.7593                  | 32   | 0.3559     | 40   | 6     |
| 21           | spacetime  | Logit(CF)          | log(malaria PfPR), Malaria Lysenko PFPR (2 Highest Endemicity)                                                                                                                                | 0.7573                  | 29   | 0.3573     | 43   | 5     |

|    |           |           |                                                                                                                                                                            |        |    |        |    |   |
|----|-----------|-----------|----------------------------------------------------------------------------------------------------------------------------------------------------------------------------|--------|----|--------|----|---|
| 22 | spacetime | Ln(Rate)  | Interaction of malaria ITN and log PFPR covariates, Malaria Prevalence-Weighted Resistance, Malaria Endemicity (40-100%)                                                   | 0.7514 | 18 | 0.3668 | 56 | 4 |
| 23 | spacetime | Logit(CF) | Interaction of malaria ITN and log PFPR covariates, Malaria Lysenko PFPR (2 Highest Endemicity), Education (years per capita)                                              | 0.7459 | 13 | 0.3694 | 62 | 3 |
| 24 | spacetime | Logit(CF) | ITN Coverage (proportion), Interaction of malaria ITN and log PFPR covariates, Malaria Lysenko PFPR (2 Highest Endemicity)                                                 | 0.7643 | 42 | 0.3528 | 32 | 3 |
| 25 | spacetime | Logit(CF) | Interaction of malaria ITN and log PFPR covariates, Malaria Lysenko PFPR (2 Highest Endemicity), Malaria Lysenko PFPR (3 Highest Endemicity), Education (years per capita) | 0.7498 | 17 | 0.3680 | 59 | 2 |
| 26 | spacetime | Logit(CF) | Interaction of malaria ITN and log PFPR covariates, Malaria Prevalence-Weighted Resistance, Malaria Lysenko PFPR (2 Highest Endemicity), Education (years per capita)      | 0.7442 | 12 | 0.3709 | 64 | 2 |
| 27 | spacetime | Ln(Rate)  | Interaction of malaria ITN and log PFPR covariates, Malaria Prevalence-Weighted Resistance                                                                                 | 0.7535 | 20 | 0.3665 | 55 | 2 |
| 28 | spacetime | Logit(CF) | Interaction of malaria ITN and log PFPR covariates                                                                                                                         | 0.7352 | 4  | 0.3743 | 84 | 1 |
| 29 | spacetime | Logit(CF) | Interaction of malaria ITN and log PFPR covariates, Malaria Lysenko PFPR (3 Highest Endemicity), Education (years per capita)                                              | 0.7545 | 24 | 0.3661 | 54 | 1 |
| 30 | spacetime | Logit(CF) | Interaction of malaria ITN and log PFPR covariates, Malaria Endemicity (5-100%)                                                                                            | 0.7410 | 8  | 0.3737 | 81 | 1 |
| 31 | spacetime | Logit(CF) | Interaction of malaria ITN and log PFPR covariates, Malaria Endemicity (40-100%)                                                                                           | 0.7415 | 9  | 0.3717 | 70 | 1 |
| 32 | spacetime | Logit(CF) | ITN Coverage (proportion), Interaction of malaria ITN and log PFPR covariates, Malaria Population-At-Risk (proportion)                                                     | 0.7660 | 48 | 0.3520 | 29 | 1 |
| 33 | spacetime | Logit(CF) | ITN Coverage (proportion), Interaction of malaria ITN and log PFPR covariates, Malaria Prevalence-Weighted Resistance, Malaria Lysenko PFPR (2 Highest Endemicity)         | 0.7672 | 51 | 0.3540 | 37 | 1 |
| 34 | spacetime | Ln(Rate)  | Interaction of malaria ITN and log PFPR covariates, log(malaria PfPR), Malaria Lysenko PFPR (2 Highest Endemicity)                                                         | 0.7752 | 69 | 0.3361 | 11 | 1 |

**Appendix Table 14g: CODEm sub-model performance - Malaria Outside Africa over 5 Males**

| Overall Rank | Model type | Dependent variable | Covariates                                                                                                                                                                                    | Root Mean Squared Error |      | Trend Test |      | Draws |
|--------------|------------|--------------------|-----------------------------------------------------------------------------------------------------------------------------------------------------------------------------------------------|-------------------------|------|------------|------|-------|
|              |            |                    |                                                                                                                                                                                               | Test 1                  | Rank | Test 1     | Rank |       |
| 1            | spacetime  | Logit(CF)          | Health System Access (capped), Malaria Lysenko PFPR (3 Highest Endemicity), Rainfall (Quintiles 3-5)                                                                                          | 0.6517                  | 54   | 0.4150     | 28   | 48    |
| 2            | spacetime  | Logit(CF)          | Health System Access (capped), Malaria Lysenko PFPR (2 Highest Endemicity), Malaria Population-At-Risk (proportion), Rainfall (Quintiles 3-5)                                                 | 0.6494                  | 41   | 0.4155     | 46   | 45    |
| 3            | spacetime  | Logit(CF)          | Health System Access (capped), Malaria Lysenko PFPR (3 Highest Endemicity), Malaria Population-At-Risk (proportion), Rainfall (Quintiles 4-5)                                                 | 0.6524                  | 58   | 0.4153     | 40   | 43    |
| 4            | spacetime  | Logit(CF)          | Interaction of malaria ITN and log PFPR covariates, log(malaria PfPR), Malaria Population-At-Risk (proportion), Rainfall (Quintiles 4-5)                                                      | 0.6618                  | 98   | 0.4136     | 6    | 41    |
| 5            | spacetime  | Logit(CF)          | Health System Access (capped), Malaria Prevalence-Weighted Resistance, Malaria Lysenko PFPR (3 Highest Endemicity), Rainfall (Quintiles 3-5)                                                  | 0.6536                  | 61   | 0.4156     | 52   | 39    |
| 6            | spacetime  | Ln(Rate)           | Health System Access (capped), Malaria Lysenko PFPR (3 Highest Endemicity), Rainfall (Quintiles 3-5)                                                                                          | 0.6571                  | 77   | 0.4154     | 42   | 37    |
| 7            | spacetime  | Logit(CF)          | ITN Coverage (proportion)                                                                                                                                                                     | 0.6613                  | 91   | 0.4152     | 32   | 36    |
| 8            | spacetime  | Logit(CF)          | Health System Access (capped), log(malaria PfPR), Malaria Population-At-Risk (proportion), Rainfall (Quintiles 3-5)                                                                           | 0.6478                  | 20   | 0.4164     | 106  | 34    |
| 9            | spacetime  | Logit(CF)          | Health System Access (capped), Malaria Population-At-Risk (proportion), Rainfall (Quintiles 4-5)                                                                                              | 0.6585                  | 81   | 0.4156     | 54   | 32    |
| 10           | spacetime  | Logit(CF)          | ITN Coverage (proportion), Malaria Lysenko PFPR (3 Highest Endemicity)                                                                                                                        | 0.6618                  | 99   | 0.4152     | 36   | 31    |
| 11           | spacetime  | Logit(CF)          | Interaction of malaria ITN and log PFPR covariates, log(malaria PfPR), Malaria Lysenko PFPR (2 Highest Endemicity)                                                                            | 0.6576                  | 79   | 0.4157     | 57   | 29    |
| 12           | spacetime  | Logit(CF)          | ITN Coverage (proportion), Interaction of malaria ITN and log PFPR covariates, Malaria Population-At-Risk (proportion), Rainfall (Quintiles 4-5)                                              | 0.6645                  | 122  | 0.4147     | 15   | 28    |
| 13           | spacetime  | Logit(CF)          | Interaction of malaria ITN and log PFPR covariates, log(malaria PfPR), Malaria Lysenko PFPR (2 Highest Endemicity), Malaria Population-At-Risk (proportion), Rainfall (Quintiles 3-5)         | 0.6645                  | 124  | 0.4146     | 14   | 27    |
| 14           | spacetime  | Logit(CF)          | Health System Access (capped), Malaria Lysenko PFPR (3 Highest Endemicity)                                                                                                                    | 0.6354                  | 2    | 0.4168     | 136  | 25    |
| 15           | spacetime  | Logit(CF)          | Health System Access (capped)                                                                                                                                                                 | 0.6347                  | 1    | 0.4168     | 138  | 24    |
| 16           | spacetime  | Logit(CF)          | Health System Access (capped), Interaction of malaria ITN and log PFPR covariates, Malaria Population-At-Risk (proportion), Rainfall (Quintiles 3-5)                                          | 0.6480                  | 24   | 0.4166     | 116  | 23    |
| 17           | spacetime  | Logit(CF)          | ITN Coverage (proportion), log(malaria PfPR), Malaria Lysenko PFPR (2 Highest Endemicity), Malaria Population-At-Risk (proportion), Rainfall (Quintiles 3-5)                                  | 0.6621                  | 102  | 0.4153     | 39   | 22    |
| 18           | spacetime  | Logit(CF)          | ITN Coverage (proportion), Interaction of malaria ITN and log PFPR covariates, Malaria Lysenko PFPR (2 Highest Endemicity), Malaria Population-At-Risk (proportion), Rainfall (Quintiles 3-5) | 0.6617                  | 97   | 0.4155     | 45   | 21    |
| 19           | spacetime  | Logit(CF)          | Health System Access (capped), Malaria Lysenko PFPR (2 Highest Endemicity), Rainfall (Quintiles 3-5)                                                                                          | 0.6547                  | 68   | 0.4160     | 77   | 20    |
| 20           | spacetime  | Logit(CF)          | ITN Coverage (proportion), log(malaria PfPR), Malaria Population-At-Risk (proportion), Rainfall (Quintiles 4-5)                                                                               | 0.6652                  | 136  | 0.4145     | 11   | 19    |
| 21           | spacetime  | Logit(CF)          | Health System Access (capped), Malaria Lysenko PFPR (2 Highest Endemicity)                                                                                                                    | 0.6372                  | 3    | 0.4169     | 146  | 18    |
| 22           | spacetime  | Logit(CF)          | Health System Access (capped), Malaria Lysenko PFPR (2 Highest Endemicity), Malaria Population-At-Risk (proportion)                                                                           | 0.6438                  | 11   | 0.4168     | 139  | 17    |



|    |           |           |                                                                                                                                                                                     |        |     |        |     |    |
|----|-----------|-----------|-------------------------------------------------------------------------------------------------------------------------------------------------------------------------------------|--------|-----|--------|-----|----|
| 23 | spacetime | Logit(CF) | Interaction of malaria ITN and log PFPR covariates, log(malaria PfPR), Malaria Lysenko PFPR (2 Highest Endemicity), Malaria Population-At-Risk (proportion)                         | 0.6608 | 85  | 0.4159 | 66  | 16 |
| 24 | spacetime | Logit(CF) | Health System Access (capped), Malaria Population-At-Risk (proportion)                                                                                                              | 0.6394 | 4   | 0.4169 | 149 | 16 |
| 25 | spacetime | Ln(Rate)  | Health System Access (capped), Malaria Lysenko PFPR (3 Highest Endemicity), Malaria Population-At-Risk (proportion), Rainfall (Quintiles 3-5)                                       | 0.6538 | 63  | 0.4163 | 94  | 15 |
| 26 | spacetime | Logit(CF) | ITN Coverage (proportion), Malaria Lysenko PFPR (2 Highest Endemicity), Malaria Lysenko PFPR (3 Highest Endemicity)                                                                 | 0.6651 | 134 | 0.4149 | 25  | 14 |
| 27 | spacetime | Ln(Rate)  | ITN Coverage (proportion)                                                                                                                                                           | 0.6648 | 127 | 0.4152 | 34  | 13 |
| 28 | spacetime | Ln(Rate)  | Health System Access (capped), Rainfall (Quintiles 3-5)                                                                                                                             | 0.6603 | 84  | 0.4160 | 75  | 13 |
| 29 | spacetime | Logit(CF) | Interaction of malaria ITN and log PFPR covariates, log(malaria PfPR), Malaria Population-At-Risk (proportion), Rainfall (Quintiles 3-5)                                            | 0.6636 | 112 | 0.4156 | 49  | 12 |
| 30 | spacetime | Logit(CF) | Health System Access (capped), ITN Coverage (proportion), log(malaria PfPR), Malaria Population-At-Risk (proportion), Rainfall (Quintiles 3-5)                                      | 0.6544 | 66  | 0.4163 | 95  | 12 |
| 31 | spacetime | Logit(CF) | Health System Access (capped), ITN Coverage (proportion), Interaction of malaria ITN and log PFPR covariates, Malaria Population-At-Risk (proportion), Rainfall (Quintiles 3-5)     | 0.6544 | 65  | 0.4164 | 98  | 11 |
| 32 | spacetime | Logit(CF) | Interaction of malaria ITN and log PFPR covariates, log(malaria PfPR), Malaria Population-At-Risk (proportion)                                                                      | 0.6592 | 82  | 0.4161 | 81  | 10 |
| 33 | spacetime | Logit(CF) | ITN Coverage (proportion), Malaria Lysenko PFPR (2 Highest Endemicity)                                                                                                              | 0.6654 | 139 | 0.4149 | 26  | 10 |
| 34 | spacetime | Logit(CF) | Health System Access (capped), Malaria Lysenko PFPR (3 Highest Endemicity), Malaria Population-At-Risk (proportion), Rainfall (Quintiles 3-5)                                       | 0.6506 | 49  | 0.4165 | 115 | 10 |
| 35 | spacetime | Logit(CF) | ITN Coverage (proportion), Interaction of malaria ITN and log PFPR covariates, log(malaria PfPR), Malaria Population-At-Risk (proportion), Rainfall (Quintiles 4-5)                 | 0.6662 | 145 | 0.4148 | 21  | 9  |
| 36 | spacetime | Ln(Rate)  | Health System Access (capped), Malaria Population-At-Risk (proportion), Rainfall (Quintiles 3-5)                                                                                    | 0.6484 | 33  | 0.4168 | 132 | 9  |
| 37 | spacetime | Logit(CF) | Interaction of malaria ITN and log PFPR covariates, log(malaria PfPR), Malaria Indoor Residual Spraying Coverage, Malaria Lysenko PFPR (2 Highest Endemicity)                       | 0.6621 | 101 | 0.4159 | 69  | 8  |
| 38 | spacetime | Logit(CF) | ITN Coverage (proportion), Malaria Lysenko PFPR (2 Highest Endemicity), Malaria Population-At-Risk (proportion)                                                                     | 0.6635 | 111 | 0.4158 | 58  | 8  |
| 39 | spacetime | Logit(CF) | ITN Coverage (proportion), log(malaria PfPR), Malaria Lysenko PFPR (2 Highest Endemicity)                                                                                           | 0.6638 | 116 | 0.4158 | 59  | 7  |
| 40 | spacetime | Logit(CF) | ITN Coverage (proportion), log(malaria PfPR), Malaria Lysenko PFPR (2 Highest Endemicity), Malaria Population-At-Risk (proportion)                                                  | 0.6616 | 96  | 0.4161 | 84  | 7  |
| 41 | spacetime | Ln(Rate)  | ITN Coverage (proportion), Malaria Lysenko PFPR (3 Highest Endemicity)                                                                                                              | 0.6655 | 140 | 0.4153 | 37  | 7  |
| 42 | spacetime | Logit(CF) | Interaction of malaria ITN and log PFPR covariates, log(malaria PfPR), Rainfall (Quintiles 3-5)                                                                                     | 0.6642 | 117 | 0.4159 | 63  | 6  |
| 43 | spacetime | Logit(CF) | Interaction of malaria ITN and log PFPR covariates, log(malaria PfPR), Malaria Indoor Residual Spraying Coverage, Malaria Population-At-Risk (proportion), Rainfall (Quintiles 4-5) | 0.6637 | 113 | 0.4159 | 70  | 6  |
| 44 | spacetime | Logit(CF) | ITN Coverage (proportion), Malaria Population-At-Risk (proportion)                                                                                                                  | 0.6579 | 80  | 0.4164 | 101 | 6  |
| 45 | spacetime | Ln(Rate)  | Health System Access (capped), Malaria Prevalence-Weighted Resistance, Malaria Lysenko PFPR (3 Highest Endemicity), Rainfall (Quintiles 3-5)                                        | 0.6620 | 100 | 0.4161 | 83  | 6  |
| 46 | spacetime | Logit(CF) | Health System Access (capped), Malaria Prevalence-Weighted Resistance                                                                                                               | 0.6404 | 5   | 0.4173 | 180 | 5  |
| 47 | spacetime | Logit(CF) | Health System Access (capped), Malaria Prevalence-Weighted Resistance, Malaria Lysenko PFPR (2 Highest Endemicity), Rainfall (Quintiles 3-5)                                        | 0.6565 | 72  | 0.4165 | 112 | 5  |

|    |           |           |                                                                                                                                                                                                        |        |     |        |     |   |
|----|-----------|-----------|--------------------------------------------------------------------------------------------------------------------------------------------------------------------------------------------------------|--------|-----|--------|-----|---|
| 48 | spacetime | Logit(CF) | Health System Access (capped), ITN Coverage (proportion), Interaction of malaria ITN and log PFPR covariates, Malaria Lysenko PFPR (2 Highest Endemicity), Malaria Population-At-Risk (proportion)     | 0.6502 | 46  | 0.4168 | 140 | 5 |
| 49 | spacetime | Ln(Rate)  | Health System Access (capped), ITN Coverage (proportion), log(malaria PfPR), Malaria Lysenko PFPR (2 Highest Endemicity), Malaria Population-At-Risk (proportion)                                      | 0.6486 | 36  | 0.4170 | 150 | 5 |
| 50 | spacetime | Logit(CF) | ITN Coverage (proportion), Interaction of malaria ITN and log PFPR covariates, Malaria Lysenko PFPR (2 Highest Endemicity), Malaria Population-At-Risk (proportion)                                    | 0.6615 | 93  | 0.4163 | 93  | 4 |
| 51 | spacetime | Logit(CF) | Health System Access (capped), Malaria Prevalence-Weighted Resistance, Malaria Lysenko PFPR (3 Highest Endemicity)                                                                                     | 0.6424 | 9   | 0.4173 | 177 | 4 |
| 52 | spacetime | Logit(CF) | Health System Access (capped), ITN Coverage (proportion), log(malaria PfPR), Malaria Lysenko PFPR (2 Highest Endemicity), Malaria Population-At-Risk (proportion)                                      | 0.6509 | 51  | 0.4168 | 135 | 4 |
| 53 | spacetime | Ln(Rate)  | Interaction of malaria ITN and log PFPR covariates, log(malaria PfPR), Malaria Population-At-Risk (proportion)                                                                                         | 0.6648 | 126 | 0.4159 | 64  | 4 |
| 54 | spacetime | Ln(Rate)  | Health System Access (capped), ITN Coverage (proportion), Interaction of malaria ITN and log PFPR covariates, Malaria Lysenko PFPR (2 Highest Endemicity), Malaria Population-At-Risk (proportion)     | 0.6485 | 34  | 0.4170 | 153 | 4 |
| 55 | spacetime | Logit(CF) | Interaction of malaria ITN and log PFPR covariates, log(malaria PfPR), Malaria Indoor Residual Spraying Coverage, Malaria Population-At-Risk (proportion)                                              | 0.6612 | 90  | 0.4164 | 103 | 3 |
| 56 | spacetime | Logit(CF) | ITN Coverage (proportion), Interaction of malaria ITN and log PFPR covariates, Malaria Lysenko PFPR (2 Highest Endemicity)                                                                             | 0.6645 | 121 | 0.4160 | 73  | 3 |
| 57 | spacetime | Logit(CF) | Health System Access (capped), Malaria Lysenko PFPR (3 Highest Endemicity), Malaria Population-At-Risk (proportion)                                                                                    | 0.6481 | 28  | 0.4171 | 163 | 3 |
| 58 | spacetime | Logit(CF) | Health System Access (capped), Malaria Prevalence-Weighted Resistance, Malaria Lysenko PFPR (2 Highest Endemicity)                                                                                     | 0.6418 | 7   | 0.4174 | 185 | 3 |
| 59 | spacetime | Ln(Rate)  | Interaction of malaria ITN and log PFPR covariates, log(malaria PfPR), Malaria Population-At-Risk (proportion), Rainfall (Quintiles 3-5)                                                               | 0.6697 | 174 | 0.4148 | 23  | 3 |
| 60 | spacetime | Ln(Rate)  | ITN Coverage (proportion), Malaria Lysenko PFPR (2 Highest Endemicity)                                                                                                                                 | 0.6693 | 171 | 0.4150 | 27  | 3 |
| 61 | spacetime | Ln(Rate)  | Health System Access (capped), Malaria Lysenko PFPR (3 Highest Endemicity), Malaria Population-At-Risk (proportion), Rainfall (Quintiles 4-5)                                                          | 0.6514 | 53  | 0.4168 | 137 | 3 |
| 62 | spacetime | Logit(CF) | Interaction of malaria ITN and log PFPR covariates, log(malaria PfPR), Malaria Indoor Residual Spraying Coverage, Malaria Lysenko PFPR (2 Highest Endemicity), Malaria Population-At-Risk (proportion) | 0.6615 | 92  | 0.4166 | 119 | 2 |
| 63 | spacetime | Logit(CF) | ITN Coverage (proportion), log(malaria PfPR), Malaria Population-At-Risk (proportion)                                                                                                                  | 0.6630 | 106 | 0.4164 | 100 | 2 |
| 64 | spacetime | Logit(CF) | ITN Coverage (proportion), Interaction of malaria ITN and log PFPR covariates, Malaria Population-At-Risk (proportion)                                                                                 | 0.6627 | 105 | 0.4165 | 111 | 2 |
| 65 | spacetime | Logit(CF) | ITN Coverage (proportion), Interaction of malaria ITN and log PFPR covariates, log(malaria PfPR), Malaria Population-At-Risk (proportion)                                                              | 0.6637 | 114 | 0.4162 | 85  | 2 |
| 66 | spacetime | Logit(CF) | ITN Coverage (proportion), Interaction of malaria ITN and log PFPR covariates, log(malaria PfPR), Malaria Population-At-Risk (proportion), Rainfall (Quintiles 3-5)                                    | 0.6651 | 132 | 0.4159 | 68  | 2 |
| 67 | spacetime | Ln(Rate)  | Interaction of malaria ITN and log PFPR covariates, log(malaria PfPR), Malaria Lysenko PFPR (2 Highest Endemicity)                                                                                     | 0.6671 | 151 | 0.4158 | 62  | 2 |

|    |           |           |                                                                                                                                                                                       |        |     |        |     |   |
|----|-----------|-----------|---------------------------------------------------------------------------------------------------------------------------------------------------------------------------------------|--------|-----|--------|-----|---|
| 68 | spacetime | Ln(Rate)  | Interaction of malaria ITN and log PFPR covariates, log(malaria PfPR), Malaria Indoor Residual Spraying Coverage, Malaria Population-At-Risk (proportion)                             | 0.6651 | 133 | 0.4161 | 82  | 2 |
| 69 | spacetime | Ln(Rate)  | Health System Access (capped)                                                                                                                                                         | 0.6411 | 6   | 0.4176 | 205 | 2 |
| 70 | spacetime | Ln(Rate)  | Health System Access (capped), Malaria Lysenko PFPR (2 Highest Endemicity)                                                                                                            | 0.6423 | 8   | 0.4176 | 204 | 2 |
| 71 | spacetime | Ln(Rate)  | Health System Access (capped), Malaria Prevalence-Weighted Resistance, Rainfall (Quintiles 3-5)                                                                                       | 0.6567 | 74  | 0.4168 | 133 | 2 |
| 72 | spacetime | Logit(CF) | log(malaria PfPR), Malaria Lysenko PFPR (2 Highest Endemicity), Malaria Population-At-Risk (proportion), Rainfall (Quintiles 3-5)                                                     | 0.6727 | 201 | 0.4148 | 18  | 1 |
| 73 | spacetime | Logit(CF) | Interaction of malaria ITN and log PFPR covariates, Malaria Lysenko PFPR (2 Highest Endemicity), Malaria Population-At-Risk (proportion), Rainfall (Quintiles 3-5)                    | 0.6749 | 218 | 0.4151 | 29  | 1 |
| 74 | spacetime | Logit(CF) | Interaction of malaria ITN and log PFPR covariates, log(malaria PfPR)                                                                                                                 | 0.6569 | 75  | 0.4172 | 171 | 1 |
| 75 | spacetime | Logit(CF) | ITN Coverage (proportion), Malaria Lysenko PFPR (3 Highest Endemicity), Malaria Population-At-Risk (proportion)                                                                       | 0.6652 | 135 | 0.4163 | 97  | 1 |
| 76 | spacetime | Logit(CF) | ITN Coverage (proportion), Malaria Lysenko PFPR (3 Highest Endemicity), Malaria Population-At-Risk (proportion), Rainfall (Quintiles 4-5)                                             | 0.6788 | 250 | 0.4132 | 2   | 1 |
| 77 | spacetime | Logit(CF) | ITN Coverage (proportion), Malaria Indoor Residual Spraying Coverage, Malaria Population-At-Risk (proportion)                                                                         | 0.6608 | 86  | 0.4170 | 154 | 1 |
| 78 | spacetime | Logit(CF) | ITN Coverage (proportion), Malaria Indoor Residual Spraying Coverage, Malaria Lysenko PFPR (3 Highest Endemicity), Malaria Population-At-Risk (proportion)                            | 0.6656 | 141 | 0.4164 | 102 | 1 |
| 79 | spacetime | Logit(CF) | ITN Coverage (proportion), Malaria Indoor Residual Spraying Coverage, Malaria Lysenko PFPR (2 Highest Endemicity), Malaria Population-At-Risk (proportion)                            | 0.6659 | 143 | 0.4161 | 79  | 1 |
| 80 | spacetime | Logit(CF) | ITN Coverage (proportion), log(malaria PfPR), Malaria Population-At-Risk (proportion), Rainfall (Quintiles 3-5)                                                                       | 0.6637 | 115 | 0.4165 | 113 | 1 |
| 81 | spacetime | Logit(CF) | ITN Coverage (proportion), Interaction of malaria ITN and log PFPR covariates, Malaria Population-At-Risk (proportion), Rainfall (Quintiles 3-5)                                      | 0.6632 | 108 | 0.4165 | 110 | 1 |
| 82 | spacetime | Logit(CF) | Health System Access (capped), Rainfall (Quintiles 4-5)                                                                                                                               | 0.6545 | 67  | 0.4170 | 152 | 1 |
| 83 | spacetime | Logit(CF) | Health System Access (capped), Rainfall (Quintiles 3-5)                                                                                                                               | 0.6526 | 59  | 0.4171 | 158 | 1 |
| 84 | spacetime | Logit(CF) | Health System Access (capped), log(malaria PfPR), Malaria Lysenko PFPR (2 Highest Endemicity), Malaria Population-At-Risk (proportion)                                                | 0.6489 | 38  | 0.4174 | 184 | 1 |
| 85 | spacetime | Logit(CF) | Health System Access (capped), Interaction of malaria ITN and log PFPR covariates, Malaria Lysenko PFPR (2 Highest Endemicity), Malaria Population-At-Risk (proportion)               | 0.6487 | 37  | 0.4175 | 197 | 1 |
| 86 | spacetime | Ln(Rate)  | Interaction of malaria ITN and log PFPR covariates, log(malaria PfPR), Rainfall (Quintiles 3-5)                                                                                       | 0.6681 | 160 | 0.4160 | 76  | 1 |
| 87 | spacetime | Ln(Rate)  | Interaction of malaria ITN and log PFPR covariates, log(malaria PfPR), Malaria Lysenko PFPR (2 Highest Endemicity), Malaria Population-At-Risk (proportion)                           | 0.6692 | 170 | 0.4156 | 53  | 1 |
| 88 | spacetime | Ln(Rate)  | Interaction of malaria ITN and log PFPR covariates, log(malaria PfPR), Malaria Lysenko PFPR (2 Highest Endemicity), Malaria Population-At-Risk (proportion), Rainfall (Quintiles 3-5) | 0.6737 | 210 | 0.4147 | 17  | 1 |
| 89 | spacetime | Ln(Rate)  | Interaction of malaria ITN and log PFPR covariates, log(malaria PfPR), Malaria Indoor Residual Spraying Coverage, Malaria Lysenko PFPR (2 Highest Endemicity)                         | 0.6682 | 163 | 0.4159 | 67  | 1 |

|    |           |          |                                                                                                                                                                                                        |        |     |        |     |   |
|----|-----------|----------|--------------------------------------------------------------------------------------------------------------------------------------------------------------------------------------------------------|--------|-----|--------|-----|---|
| 90 | spacetime | Ln(Rate) | Interaction of malaria ITN and log PFPR covariates, log(malaria PfPR), Malaria Indoor Residual Spraying Coverage, Malaria Lysenko PFPR (2 Highest Endemicity), Malaria Population-At-Risk (proportion) | 0.6682 | 161 | 0.4162 | 86  | 1 |
| 91 | spacetime | Ln(Rate) | Health System Access (capped), Malaria Population-At-Risk (proportion)                                                                                                                                 | 0.6455 | 12  | 0.4178 | 224 | 1 |
| 92 | spacetime | Ln(Rate) | Health System Access (capped), Malaria Population-At-Risk (proportion), Rainfall (Quintiles 4-5)                                                                                                       | 0.6517 | 55  | 0.4171 | 162 | 1 |
| 93 | spacetime | Ln(Rate) | Health System Access (capped), Malaria Lysenko PFPR (3 Highest Endemicity)                                                                                                                             | 0.6427 | 10  | 0.4176 | 211 | 1 |
| 94 | spacetime | Ln(Rate) | Health System Access (capped), log(malaria PfPR), Malaria Lysenko PFPR (2 Highest Endemicity), Malaria Population-At-Risk (proportion)                                                                 | 0.6462 | 13  | 0.4178 | 233 | 1 |

**Appendix Table 14h: CODEm sub-model performance - Malaria Outside Africa over 5 Females**

| Overall Rank | Model type | Dependent variable | Covariates                                                                                                                                                                                                                   | Root Mean Squared Error |      | Trend Test |      | Draws |
|--------------|------------|--------------------|------------------------------------------------------------------------------------------------------------------------------------------------------------------------------------------------------------------------------|-------------------------|------|------------|------|-------|
|              |            |                    |                                                                                                                                                                                                                              | Test 1                  | Rank | Test 1     | Rank |       |
| 1            | spacetime  | Ln(Rate)           | Health System Access (capped), Malaria Lysenko PFPR (3 Highest Endemicity), Malaria Population-At-Risk (proportion), Rainfall (Quintiles 4-5)                                                                                | 0.6626                  | 2    | 0.3869     | 18   | 48    |
| 2            | spacetime  | Logit(CF)          | Health System Access (capped), Interaction of malaria ITN and log PFPR covariates, Malaria Lysenko PFPR (3 Highest Endemicity), Malaria Population-At-Risk (proportion), Rainfall (Quintiles 4-5)                            | 0.6686                  | 15   | 0.3866     | 13   | 45    |
| 3            | spacetime  | Logit(CF)          | Health System Access (capped), ITN Coverage (proportion), Interaction of malaria ITN and log PFPR covariates, Malaria Lysenko PFPR (3 Highest Endemicity), Malaria Population-At-Risk (proportion), Rainfall (Quintiles 4-5) | 0.6699                  | 21   | 0.3858     | 10   | 43    |
| 4            | spacetime  | Logit(CF)          | Health System Access (capped), log(malaria PfPR), Malaria Lysenko PFPR (3 Highest Endemicity), Malaria Population-At-Risk (proportion), Rainfall (Quintiles 4-5)                                                             | 0.6695                  | 18   | 0.3878     | 24   | 41    |
| 5            | spacetime  | Logit(CF)          | Health System Access (capped), ITN Coverage (proportion), Interaction of malaria ITN and log PFPR covariates                                                                                                                 | 0.6682                  | 13   | 0.3889     | 32   | 39    |
| 6            | spacetime  | Logit(CF)          | Health System Access (capped), Interaction of malaria ITN and log PFPR covariates, Malaria Population-At-Risk (proportion), Rainfall (Quintiles 4-5)                                                                         | 0.6716                  | 43   | 0.3857     | 8    | 37    |
| 7            | spacetime  | Logit(CF)          | Health System Access (capped), ITN Coverage (proportion), log(malaria PfPR), Malaria Lysenko PFPR (3 Highest Endemicity), Malaria Population-At-Risk (proportion), Rainfall (Quintiles 4-5)                                  | 0.6710                  | 33   | 0.3875     | 22   | 36    |
| 8            | spacetime  | Logit(CF)          | Health System Access (capped), ITN Coverage (proportion), Interaction of malaria ITN and log PFPR covariates, Malaria Population-At-Risk (proportion)                                                                        | 0.6704                  | 27   | 0.3889     | 31   | 34    |
| 9            | spacetime  | Logit(CF)          | Health System Access (capped), ITN Coverage (proportion), log(malaria PfPR)                                                                                                                                                  | 0.6700                  | 22   | 0.3891     | 37   | 32    |
| 10           | spacetime  | Ln(Rate)           | Health System Access (capped), Malaria Prevalence-Weighted Resistance, Rainfall (Quintiles 4-5)                                                                                                                              | 0.6681                  | 12   | 0.3899     | 50   | 31    |
| 11           | spacetime  | Ln(Rate)           | Health System Access (capped), Malaria Population-At-Risk (proportion), Rainfall (Quintiles 4-5)                                                                                                                             | 0.6736                  | 61   | 0.3847     | 4    | 29    |
| 12           | spacetime  | Logit(CF)          | Health System Access (capped), ITN Coverage (proportion), Interaction of malaria ITN and log PFPR covariates, Malaria Lysenko PFPR (3 Highest Endemicity), Malaria Population-At-Risk (proportion)                           | 0.6703                  | 24   | 0.3894     | 42   | 28    |
| 13           | spacetime  | Logit(CF)          | Health System Access (capped), Malaria Lysenko PFPR (3 Highest Endemicity), Malaria Population-At-Risk (proportion), Rainfall (Quintiles 4-5)                                                                                | 0.6738                  | 64   | 0.3841     | 3    | 27    |
| 14           | spacetime  | Logit(CF)          | Health System Access (capped), ITN Coverage (proportion), Interaction of malaria ITN and log PFPR covariates, Malaria Population-At-Risk (proportion), Rainfall (Quintiles 4-5)                                              | 0.6736                  | 62   | 0.3849     | 6    | 25    |
| 15           | spacetime  | Logit(CF)          | Health System Access (capped), log(malaria PfPR), Malaria Population-At-Risk (proportion), Rainfall (Quintiles 4-5)                                                                                                          | 0.6727                  | 54   | 0.3869     | 16   | 24    |
| 16           | spacetime  | Logit(CF)          | Health System Access (capped), ITN Coverage (proportion), log(malaria PfPR), Malaria Population-At-Risk (proportion)                                                                                                         | 0.6716                  | 42   | 0.3889     | 35   | 23    |
| 17           | spacetime  | Logit(CF)          | Health System Access (capped), ITN Coverage (proportion), Malaria Lysenko PFPR (3 Highest Endemicity), Malaria Population-At-Risk (proportion), Rainfall (Quintiles 4-5)                                                     | 0.6657                  | 6    | 0.3909     | 71   | 22    |
| 18           | spacetime  | Logit(CF)          | Health System Access (capped), ITN Coverage (proportion), log(malaria PfPR), Malaria Lysenko PFPR (3 Highest Endemicity), Malaria Population-At-Risk (proportion)                                                            | 0.6714                  | 37   | 0.3895     | 45   | 21    |

|    |           |           |                                                                                                                                                                                                    |        |     |        |     |    |
|----|-----------|-----------|----------------------------------------------------------------------------------------------------------------------------------------------------------------------------------------------------|--------|-----|--------|-----|----|
| 19 | spacetime | Logit(CF) | Health System Access (capped), ITN Coverage (proportion), log(malaria PfPR), Malaria Population-At-Risk (proportion), Rainfall (Quintiles 4-5)                                                     | 0.6749 | 70  | 0.3867 | 14  | 20 |
| 20 | spacetime | Logit(CF) | Health System Access (capped), ITN Coverage (proportion), Interaction of malaria ITN and log PFPR covariates, Malaria Lysenko PFPR (2 Highest Endemicity)                                          | 0.6745 | 67  | 0.3890 | 36  | 19 |
| 21 | spacetime | Ln(Rate)  | Health System Access (capped), Rainfall (Quintiles 4-5)                                                                                                                                            | 0.6755 | 79  | 0.3885 | 27  | 18 |
| 22 | spacetime | Logit(CF) | Health System Access (capped), Interaction of malaria ITN and log PFPR covariates                                                                                                                  | 0.6704 | 25  | 0.3914 | 85  | 17 |
| 23 | spacetime | Logit(CF) | Health System Access (capped), Interaction of malaria ITN and log PFPR covariates, Malaria Population-At-Risk (proportion)                                                                         | 0.6688 | 16  | 0.3916 | 98  | 16 |
| 24 | spacetime | Logit(CF) | Health System Access (capped), ITN Coverage (proportion), Malaria Lysenko PFPR (2 Highest Endemicity), Malaria Population-At-Risk (proportion)                                                     | 0.6729 | 56  | 0.3901 | 58  | 16 |
| 25 | spacetime | Logit(CF) | Health System Access (capped), Interaction of malaria ITN and log PFPR covariates, Malaria Lysenko PFPR (2 Highest Endemicity)                                                                     | 0.6712 | 36  | 0.3913 | 80  | 15 |
| 26 | spacetime | Logit(CF) | Health System Access (capped), ITN Coverage (proportion), log(malaria PfPR), Malaria Lysenko PFPR (2 Highest Endemicity)                                                                           | 0.6763 | 81  | 0.3892 | 38  | 14 |
| 27 | spacetime | Logit(CF) | ITN Coverage (proportion), Malaria Lysenko PFPR (3 Highest Endemicity), Malaria Population-At-Risk (proportion), Rainfall (Quintiles 4-5)                                                          | 0.6783 | 98  | 0.3889 | 33  | 13 |
| 28 | spacetime | Logit(CF) | Health System Access (capped), Malaria Population-At-Risk (proportion), Rainfall (Quintiles 4-5)                                                                                                   | 0.6804 | 118 | 0.3839 | 2   | 13 |
| 29 | spacetime | Logit(CF) | Health System Access (capped), Malaria Lysenko PFPR (2 Highest Endemicity)                                                                                                                         | 0.6708 | 31  | 0.3917 | 106 | 12 |
| 30 | spacetime | Logit(CF) | Health System Access (capped), Interaction of malaria ITN and log PFPR covariates, Malaria Lysenko PFPR (3 Highest Endemicity), Malaria Population-At-Risk (proportion)                            | 0.6720 | 47  | 0.3916 | 93  | 12 |
| 31 | spacetime | Ln(Rate)  | Health System Access (capped), ITN Coverage (proportion), Interaction of malaria ITN and log PFPR covariates, Malaria Lysenko PFPR (2 Highest Endemicity), Malaria Population-At-Risk (proportion) | 0.6729 | 57  | 0.3914 | 88  | 11 |
| 32 | spacetime | Logit(CF) | Health System Access (capped), Malaria Prevalence-Weighted Resistance, Rainfall (Quintiles 4-5)                                                                                                    | 0.6813 | 127 | 0.3883 | 25  | 10 |
| 33 | spacetime | Logit(CF) | Health System Access (capped), log(malaria PfPR), Malaria Population-At-Risk (proportion)                                                                                                          | 0.6698 | 20  | 0.3921 | 131 | 10 |
| 34 | spacetime | Ln(Rate)  | Health System Access (capped), ITN Coverage (proportion), log(malaria PfPR), Malaria Lysenko PFPR (2 Highest Endemicity), Malaria Population-At-Risk (proportion)                                  | 0.6739 | 65  | 0.3915 | 89  | 10 |
| 35 | spacetime | Logit(CF) | Health System Access (capped), Malaria Lysenko PFPR (2 Highest Endemicity), Malaria Population-At-Risk (proportion), Rainfall (Quintiles 4-5)                                                      | 0.6824 | 138 | 0.3869 | 17  | 9  |
| 36 | spacetime | Logit(CF) | Health System Access (capped), ITN Coverage (proportion), Malaria Lysenko PFPR (3 Highest Endemicity), Malaria Population-At-Risk (proportion)                                                     | 0.6666 | 9   | 0.3925 | 148 | 9  |
| 37 | spacetime | Logit(CF) | Health System Access (capped), Malaria Lysenko PFPR (2 Highest Endemicity), Malaria Population-At-Risk (proportion)                                                                                | 0.6748 | 69  | 0.3915 | 91  | 8  |
| 38 | spacetime | Logit(CF) | Health System Access (capped), ITN Coverage (proportion), Interaction of malaria ITN and log PFPR covariates, Malaria Lysenko PFPR (2 Highest Endemicity), Malaria Population-At-Risk (proportion) | 0.6799 | 106 | 0.3899 | 53  | 8  |
| 39 | spacetime | Logit(CF) | Health System Access (capped), Rainfall (Quintiles 4-5)                                                                                                                                            | 0.6842 | 154 | 0.3864 | 12  | 7  |
| 40 | spacetime | Logit(CF) | Health System Access (capped), Malaria Prevalence-Weighted Resistance, Malaria Lysenko PFPR (2 Highest Endemicity)                                                                                 | 0.6716 | 41  | 0.3920 | 124 | 7  |

|    |           |           |                                                                                                                                                                                                                              |        |     |        |     |   |
|----|-----------|-----------|------------------------------------------------------------------------------------------------------------------------------------------------------------------------------------------------------------------------------|--------|-----|--------|-----|---|
| 41 | spacetime | Ln(Rate)  | Health System Access (capped), ITN Coverage (proportion), Interaction of malaria ITN and log PFPR covariates, Malaria Lysenko PFPR (2 Highest Endemicity), Malaria Population-At-Risk (proportion), Rainfall (Quintiles 3-5) | 0.6770 | 89  | 0.3911 | 76  | 7 |
| 42 | spacetime | Logit(CF) | Health System Access (capped), log(malaria PfPR)                                                                                                                                                                             | 0.6715 | 40  | 0.3922 | 135 | 6 |
| 43 | spacetime | Logit(CF) | Health System Access (capped), Interaction of malaria ITN and log PFPR covariates, Malaria Lysenko PFPR (2 Highest Endemicity), Malaria Population-At-Risk (proportion)                                                      | 0.6761 | 80  | 0.3915 | 92  | 6 |
| 44 | spacetime | Logit(CF) | Health System Access (capped), ITN Coverage (proportion), log(malaria PfPR), Malaria Lysenko PFPR (2 Highest Endemicity), Malaria Population-At-Risk (proportion)                                                            | 0.6810 | 124 | 0.3899 | 51  | 6 |
| 45 | spacetime | Ln(Rate)  | Health System Access (capped), ITN Coverage (proportion), log(malaria PfPR), Malaria Lysenko PFPR (2 Highest Endemicity), Malaria Population-At-Risk (proportion), Rainfall (Quintiles 3-5)                                  | 0.6782 | 97  | 0.3912 | 78  | 6 |
| 46 | spacetime | Logit(CF) | Health System Access (capped), Malaria Population-At-Risk (proportion)                                                                                                                                                       | 0.6709 | 32  | 0.3926 | 154 | 5 |
| 47 | spacetime | Logit(CF) | Health System Access (capped), Malaria Lysenko PFPR (3 Highest Endemicity), Malaria Population-At-Risk (proportion)                                                                                                          | 0.6718 | 45  | 0.3923 | 138 | 5 |
| 48 | spacetime | Logit(CF) | Health System Access (capped), Malaria Lysenko PFPR (2 Highest Endemicity), Malaria Lysenko PFPR (3 Highest Endemicity)                                                                                                      | 0.6746 | 68  | 0.3918 | 108 | 5 |
| 49 | spacetime | Logit(CF) | Health System Access (capped), log(malaria PfPR), Malaria Lysenko PFPR (2 Highest Endemicity)                                                                                                                                | 0.6730 | 58  | 0.3921 | 126 | 5 |
| 50 | spacetime | Logit(CF) | Health System Access (capped)                                                                                                                                                                                                | 0.6721 | 48  | 0.3926 | 158 | 4 |
| 51 | spacetime | Logit(CF) | Health System Access (capped), log(malaria PfPR), Malaria Lysenko PFPR (3 Highest Endemicity), Malaria Population-At-Risk (proportion)                                                                                       | 0.6726 | 52  | 0.3921 | 134 | 4 |
| 52 | spacetime | Logit(CF) | Health System Access (capped), log(malaria PfPR), Malaria Lysenko PFPR (2 Highest Endemicity), Malaria Population-At-Risk (proportion)                                                                                       | 0.6769 | 86  | 0.3920 | 122 | 4 |
| 53 | spacetime | Ln(Rate)  | Health System Access (capped), ITN Coverage (proportion), log(malaria PfPR), Malaria Population-At-Risk (proportion)                                                                                                         | 0.6740 | 66  | 0.3923 | 140 | 4 |
| 54 | spacetime | Ln(Rate)  | Health System Access (capped), ITN Coverage (proportion), Interaction of malaria ITN and log PFPR covariates, Malaria Population-At-Risk (proportion)                                                                        | 0.6735 | 60  | 0.3922 | 137 | 4 |
| 55 | spacetime | Logit(CF) | Health System Access (capped), Malaria Lysenko PFPR (3 Highest Endemicity)                                                                                                                                                   | 0.6753 | 76  | 0.3925 | 145 | 3 |
| 56 | spacetime | Logit(CF) | Health System Access (capped), ITN Coverage (proportion), Malaria Lysenko PFPR (2 Highest Endemicity), Malaria Population-At-Risk (proportion), Rainfall (Quintiles 4-5)                                                     | 0.6806 | 120 | 0.3915 | 90  | 3 |
| 57 | spacetime | Logit(CF) | Health System Access (capped), ITN Coverage (proportion), Interaction of malaria ITN and log PFPR covariates, Malaria Lysenko PFPR (2 Highest Endemicity), Malaria Population-At-Risk (proportion), Rainfall (Quintiles 3-5) | 0.6802 | 111 | 0.3918 | 112 | 3 |
| 58 | spacetime | Ln(Rate)  | Health System Access (capped), Malaria Prevalence-Weighted Resistance, Malaria Lysenko PFPR (2 Highest Endemicity)                                                                                                           | 0.6660 | 7   | 0.3940 | 225 | 3 |
| 59 | spacetime | Ln(Rate)  | Health System Access (capped), Interaction of malaria ITN and log PFPR covariates, Malaria Lysenko PFPR (2 Highest Endemicity), Malaria Population-At-Risk (proportion)                                                      | 0.6724 | 51  | 0.3928 | 168 | 3 |
| 60 | spacetime | Ln(Rate)  | Health System Access (capped), ITN Coverage (proportion), log(malaria PfPR), Malaria Lysenko PFPR (2 Highest Endemicity)                                                                                                     | 0.6752 | 73  | 0.3927 | 160 | 3 |
| 61 | spacetime | Ln(Rate)  | Health System Access (capped), ITN Coverage (proportion), Interaction of malaria ITN and log PFPR covariates, Malaria Lysenko PFPR (2 Highest Endemicity)                                                                    | 0.6753 | 74  | 0.3925 | 150 | 3 |
| 62 | spacetime | Logit(CF) | Malaria Lysenko PFPR (2 Highest Endemicity)                                                                                                                                                                                  | 0.6877 | 178 | 0.3906 | 61  | 2 |
| 63 | spacetime | Logit(CF) | Malaria Lysenko PFPR (2 Highest Endemicity), Malaria Lysenko PFPR (3 Highest Endemicity)                                                                                                                                     | 0.6886 | 187 | 0.3906 | 62  | 2 |

|    |           |           |                                                                                                                                                                                             |        |     |        |     |   |
|----|-----------|-----------|---------------------------------------------------------------------------------------------------------------------------------------------------------------------------------------------|--------|-----|--------|-----|---|
| 64 | spacetime | Logit(CF) | Malaria Lysenko PFPR (2 Highest Endemicity), Malaria Lysenko PFPR (3 Highest Endemicity), Malaria Population-At-Risk (proportion)                                                           | 0.6887 | 191 | 0.3907 | 65  | 2 |
| 65 | spacetime | Logit(CF) | Health System Access (capped), Malaria Prevalence-Weighted Resistance                                                                                                                       | 0.6726 | 53  | 0.3930 | 181 | 2 |
| 66 | spacetime | Logit(CF) | Health System Access (capped), Interaction of malaria ITN and log PFPR covariates, Malaria Population-At-Risk (proportion), Rainfall (Quintiles 3-5)                                        | 0.6694 | 17  | 0.3942 | 237 | 2 |
| 67 | spacetime | Logit(CF) | Health System Access (capped), ITN Coverage (proportion), Malaria Lysenko PFPR (2 Highest Endemicity), Malaria Population-At-Risk (proportion), Rainfall (Quintiles 3-5)                    | 0.6753 | 75  | 0.3929 | 176 | 2 |
| 68 | spacetime | Logit(CF) | Health System Access (capped), ITN Coverage (proportion), log(malaria PfPR), Malaria Lysenko PFPR (2 Highest Endemicity), Malaria Population-At-Risk (proportion), Rainfall (Quintiles 3-5) | 0.6815 | 129 | 0.3921 | 128 | 2 |
| 69 | spacetime | Ln(Rate)  | Health System Access (capped), Malaria Lysenko PFPR (3 Highest Endemicity), Malaria Population-At-Risk (proportion)                                                                         | 0.6650 | 4   | 0.3941 | 231 | 2 |
| 70 | spacetime | Ln(Rate)  | Health System Access (capped), Malaria Lysenko PFPR (2 Highest Endemicity)                                                                                                                  | 0.6719 | 46  | 0.3937 | 210 | 2 |
| 71 | spacetime | Ln(Rate)  | Health System Access (capped), log(malaria PfPR), Malaria Lysenko PFPR (2 Highest Endemicity), Malaria Population-At-Risk (proportion)                                                      | 0.6730 | 59  | 0.3931 | 186 | 2 |
| 72 | spacetime | Logit(CF) | Malaria Lysenko PFPR (3 Highest Endemicity)                                                                                                                                                 | 0.6904 | 225 | 0.3907 | 63  | 1 |
| 73 | spacetime | Logit(CF) | Malaria Lysenko PFPR (3 Highest Endemicity), Malaria Population-At-Risk (proportion), Rainfall (Quintiles 4-5)                                                                              | 0.6932 | 262 | 0.3824 | 1   | 1 |
| 74 | spacetime | Logit(CF) | Malaria Lysenko PFPR (2 Highest Endemicity), Malaria Population-At-Risk (proportion)                                                                                                        | 0.6889 | 196 | 0.3907 | 64  | 1 |
| 75 | spacetime | Logit(CF) | Malaria Lysenko PFPR (2 Highest Endemicity), Malaria Population-At-Risk (proportion), Rainfall (Quintiles 4-5)                                                                              | 0.6943 | 286 | 0.3854 | 7   | 1 |
| 76 | spacetime | Logit(CF) | Malaria Indoor Residual Spraying Coverage, Malaria Population-At-Risk (proportion)                                                                                                          | 0.6854 | 163 | 0.3921 | 127 | 1 |
| 77 | spacetime | Logit(CF) | Malaria Indoor Residual Spraying Coverage, Malaria Lysenko PFPR (3 Highest Endemicity), Malaria Population-At-Risk (proportion)                                                             | 0.6868 | 172 | 0.3919 | 118 | 1 |
| 78 | spacetime | Logit(CF) | Malaria Indoor Residual Spraying Coverage, Malaria Lysenko PFPR (3 Highest Endemicity), Malaria Population-At-Risk (proportion), Rainfall (Quintiles 4-5)                                   | 0.6932 | 263 | 0.3886 | 29  | 1 |
| 79 | spacetime | Logit(CF) | Malaria Indoor Residual Spraying Coverage, Malaria Lysenko PFPR (2 Highest Endemicity), Malaria Population-At-Risk (proportion)                                                             | 0.6871 | 174 | 0.3917 | 100 | 1 |
| 80 | spacetime | Logit(CF) | ITN Coverage (proportion), Malaria Indoor Residual Spraying Coverage                                                                                                                        | 0.6834 | 148 | 0.3921 | 133 | 1 |
| 81 | spacetime | Logit(CF) | ITN Coverage (proportion), Malaria Indoor Residual Spraying Coverage, Malaria Lysenko PFPR (2 Highest Endemicity)                                                                           | 0.6861 | 167 | 0.3916 | 96  | 1 |
| 82 | spacetime | Logit(CF) | Health System Access (capped), Rainfall (Quintiles 3-5)                                                                                                                                     | 0.6766 | 82  | 0.3933 | 194 | 1 |
| 83 | spacetime | Logit(CF) | Health System Access (capped), Malaria Lysenko PFPR (2 Highest Endemicity), Malaria Population-At-Risk (proportion), Rainfall (Quintiles 3-5)                                               | 0.6752 | 72  | 0.3934 | 201 | 1 |
| 84 | spacetime | Logit(CF) | Health System Access (capped), log(malaria PfPR), Malaria Population-At-Risk (proportion), Rainfall (Quintiles 3-5)                                                                         | 0.6706 | 29  | 0.3946 | 263 | 1 |
| 85 | spacetime | Ln(Rate)  | Health System Access (capped)                                                                                                                                                               | 0.6678 | 11  | 0.3946 | 259 | 1 |
| 86 | spacetime | Ln(Rate)  | Health System Access (capped), Malaria Population-At-Risk (proportion)                                                                                                                      | 0.6674 | 10  | 0.3944 | 252 | 1 |
| 87 | spacetime | Ln(Rate)  | Health System Access (capped), Malaria Lysenko PFPR (3 Highest Endemicity)                                                                                                                  | 0.6714 | 38  | 0.3945 | 254 | 1 |
| 88 | spacetime | Ln(Rate)  | Health System Access (capped), Malaria Lysenko PFPR (2 Highest Endemicity), Malaria Population-At-Risk (proportion)                                                                         | 0.6737 | 63  | 0.3933 | 196 | 1 |
| 89 | spacetime | Ln(Rate)  | Health System Access (capped), Malaria Prevalence-Weighted Resistance                                                                                                                       | 0.6620 | 1   | 0.3949 | 273 | 1 |



|    |           |          |                                                                                                                                                                                                    |        |     |        |     |   |
|----|-----------|----------|----------------------------------------------------------------------------------------------------------------------------------------------------------------------------------------------------|--------|-----|--------|-----|---|
| 90 | spacetime | Ln(Rate) | Health System Access (capped), Malaria Prevalence-Weighted Resistance, Malaria Lysenko PFPR (3 Highest Endemicity)                                                                                 | 0.6644 | 3   | 0.3948 | 267 | 1 |
| 91 | spacetime | Ln(Rate) | Health System Access (capped), Interaction of malaria ITN and log PFPR covariates, Malaria Lysenko PFPR (2 Highest Endemicity)                                                                     | 0.6769 | 87  | 0.3929 | 175 | 1 |
| 92 | spacetime | Ln(Rate) | Health System Access (capped), ITN Coverage (proportion), log(malaria PfPR), Malaria Lysenko PFPR (3 Highest Endemicity), Malaria Population-At-Risk (proportion)                                  | 0.6779 | 96  | 0.3932 | 190 | 1 |
| 93 | spacetime | Ln(Rate) | Health System Access (capped), ITN Coverage (proportion), Interaction of malaria ITN and log PFPR covariates                                                                                       | 0.6802 | 112 | 0.3927 | 162 | 1 |
| 94 | spacetime | Ln(Rate) | Health System Access (capped), ITN Coverage (proportion), Interaction of malaria ITN and log PFPR covariates, Malaria Lysenko PFPR (3 Highest Endemicity), Malaria Population-At-Risk (proportion) | 0.6776 | 91  | 0.3931 | 189 | 1 |

**Appendix Table 15: Countries grouped by data used for estimation of malaria incident cases**

| Study-level data | WHO data adjusted for undercount | WHO case report data used |
|------------------|----------------------------------|---------------------------|
| AGO              | AFG                              | BLZ                       |
| BDI              | ARE                              | CHN                       |
| BEN              | ARG                              | IRN                       |
| BFA              | ARM                              | KGZ                       |
| CAF              | AZE                              | PAN                       |
| CIV              | BGD                              | SAU                       |
| CMR              | BOL                              | TJK                       |
| COD              | BRA                              | ZAF                       |
| COG              | BTN                              |                           |
| ETH              | BWA                              |                           |
| GAB              | COL                              |                           |
| GHA              | COM                              |                           |
| GIN              | CPV                              |                           |
| GMB              | CRI                              |                           |
| GNB              | DJI                              |                           |
| GNQ              | DOM                              |                           |
| GUF              | EGY                              |                           |
| IDN              | ERI                              |                           |
| IND              | GEO                              |                           |
| KEN              | GTM                              |                           |
| LBR              | GUY                              |                           |
| MDG              | HND                              |                           |
| MLI              | HTI                              |                           |
| MMR              | IRQ                              |                           |
| MOZ              | KHM                              |                           |
| MRT              | KOR                              |                           |
| MUS              | LAO                              |                           |
| MWI              | LBY                              |                           |
| MYT              | LKA                              |                           |
| NER              | MAR                              |                           |
| NGA              | MEX                              |                           |
| PNG              | MYS                              |                           |
| RWA              | NAM                              |                           |
| SDN              | NIC                              |                           |
| SEN              | NPL                              |                           |
| SLE              | OMN                              |                           |
| SOM              | PAK                              |                           |
| SSD              | PER                              |                           |
| TCD              | PHL                              |                           |
| TGO              | PRK                              |                           |
| TZA              | PRY                              |                           |
| UGA              | SLB                              |                           |
| YEM              | SLV                              |                           |
| ZMB              | STP                              |                           |

|     |     |  |
|-----|-----|--|
| ZWE | SUR |  |
|     | SWZ |  |
|     | SYR |  |
|     | THA |  |
|     | TKM |  |
|     | TLS |  |
|     | TUR |  |
|     | UZB |  |
|     | VEN |  |
|     | VNM |  |
|     | VUT |  |
